# **Ordered dephosphorylation initiated by the selective proteolysis of cyclin B drives mitotic exit**

James Holder, Shabaz Mohammed and Francis A. Barr

Department of Biochemistry, University of Oxford, South Parks Road, Oxford

OX1 3QU

Please address correspondence to:

[francis.barr@bioch.ox.ac.uk](mailto:francis.barr@bioch.ox.ac.uk)

[james.holder@path.ox.ac.uk](mailto:james.holder@path.ox.ac.uk)

**Keywords:** Cell cycle, proteolysis, phosphatase, kinase

**Running title:** Protein dephosphorylation drives mitotic exit

## ABSTRACT

APC/C-mediated proteolysis of cyclin B and securin promotes entry into anaphase, inactivating CDK1 and permitting chromosome segregation, respectively. Reduction of CDK1 activity relieves inhibition of the CDK1-opposing phosphatases PP1 and PP2A-B55 leading to dephosphorylation of substrates crucial for mitotic exit.

Meanwhile, continued APC/C activity is required to target various proteins, including Aurora and Polo kinases, for degradation. Together, these activities orchestrate a complex series of events during mitotic exit. However, the relative importance of regulated proteolysis and dephosphorylation in dictating the order and timing of these events remains unclear. Using high temporal-resolution mass spectrometry, we compare the relative extent of proteolysis and protein dephosphorylation. This reveals highly-selective rapid (~5min half-life) proteolysis of cyclin B, securin and geminin at the metaphase to anaphase transition, followed by slow proteolysis (>60 min half-life) of other mitotic regulators. Protein dephosphorylation requires APC/C-dependent destruction of cyclin B and was resolved into PP1-dependent fast, intermediate and slow categories with unique sequence motifs. We conclude that dephosphorylation initiated by the selective proteolysis of cyclin B drives the bulk of changes observed during mitotic exit.

## INTRODUCTION

Each cell cycle concludes with mitotic exit, wherein aligned chromosomes are segregated into two newly forming daughter cells. This process has to be executed faithfully, since errors adversely impact the longevity and genomic stability of daughter cells, thus contributing to a variety of pathologies, including cancer and neurological disorders (Chunduri and Storchova, 2019; Gordon et al., 2012). Mitotic exit is highly complex, involving wide-ranging changes in cell morphology, cytoskeletal architecture and genome packaging, alongside the reformation of membrane-bound organelles (Lowe and Barr, 2007). These dramatic events occur in a matter of minutes, necessitating a regulatory system that incorporates specific timing properties. Two modes of regulation dominate the current understanding of mitotic exit; ubiquitin-dependent proteolysis and protein dephosphorylation, mediated by the anaphase-promoting complex/cyclosome (APC/C) and phospho-protein phosphatases (PPP), respectively (Holder et al., 2019; Nilsson, 2019; Sivakumar and Gorbsky, 2015; Watson et al., 2019). Together these regulatory mechanisms coordinate global removal of CDK phosphorylation, local removal of Polo and Aurora kinase phosphorylations and degradation of mitotic proteins. However, direct analysis of the relative contributions of these two regulatory branches to the successful completion of mitotic exit remains incompletely understood and data often lacks sufficient time-resolution.

PP1 and PP2A-B55, both members of the PPP family, are thought to be the major phosphatases responsible for dephosphorylation during mitotic exit in human cells (Castilho et al., 2009; Cundell et al., 2013; Cundell et al., 2016; Holder et al., 2019; McCloy et al., 2015; Mochida et al., 2009; Rodrigues et al., 2015; Schmitz et al., 2010; Trinkle-Mulcahy et al., 2006; Vagnarelli et al., 2011; Wu et al., 2009).

Consequently, PP1 and PP2A-B55 are inhibited by the cyclin B-dependent kinase 1 (CDK1-cyclin B) following mitotic entry, allowing mitotic phosphorylation to accumulate. PP1 is directly inhibited by CDK1-cyclin B through phosphorylation in the C-terminal tail at PP1-T320 (Dohadwala et al., 1994; Yamano et al., 1994). Inhibition of PP2A-B55 is indirect and mediated by the B55-ENSA-Greatwall (BEG) pathway (Castilho et al., 2009; Cundell et al., 2013; Gharbi-Ayachi et al., 2010; Mochida et al., 2010). ENSA itself is only slowly dephosphorylated by PP2A-B55, leading to the characteristic delay in dephosphorylation of PP2A-B55 substrates following cyclin B degradation (Cundell et al., 2013; Williams et al., 2014). Therefore, degradation of cyclin B triggers inactivation of CDK1 and relieves the inhibition of the opposing phosphatases, PP1 and PP2A-B55, resulting in global protein-dephosphorylation.

PP1 and PP2A share highly similar catalytic subunits and individually do not demonstrate different substrate specificities, necessitating the presence of regulatory subunits to target their activities appropriately (Agostinis et al., 1992; Imaoka et al., 1983; Mumby et al., 1987). PP1 catalytic subunits, PPP1CA/B/C, can bind hundreds of regulatory subunits (Bollen et al., 2010). In contrast, the B55 regulatory subunit interacts with both PPP2CA/B catalytic and a scaffold subunit to form PP2A-B55 holoenzymes (Xing et al., 2006; Xu et al., 2006). The phospho-site preferences of PPPs have previously been shown to impact the order of events during mitotic exit. An acidic patch on the surface of the B55 subunit confers a preference to PP2A-B55 holoenzymes for phospho-sites flanked by a bi-partite basic motif (Cundell et al., 2016). Significantly, the substrates with the highest rates of B55-dependent dephosphorylation are the most basic, typically the proteins involved in spindle morphology changes such as PRC1 and TPX2. Conversely the slowest

dephosphorylated substrates are less basic and include nuclear pore and envelope proteins such as nuclear pore complex protein 153 (NUP153). This ensures that nuclear envelope reformation and import occur downstream of chromosome segregation and central spindle formation (Cundell et al., 2016). Furthermore, phospho-threonine is more readily dephosphorylated by PP2A-B55 than phospho-serine, impacting spindle assembly checkpoint responsiveness and APC/C co-factor selection, and therefore substrate specificity (Hein et al., 2017). A proteomic study conducted in HeLa cells suggested that these phospho-site preferences apply to the bulk of phosphatases active in mitotic exit, not just to PP2A-B55 (McCloy et al., 2015). Nevertheless this analysis was limited to one timepoint during early mitotic exit under conditions of proteasome inhibition. A further analysis of mitotic exit in budding yeast found that early dephosphorylations were more basic than later dephosphorylations, correlating with the kinase motifs of CDK and PLK1, respectively (Touati and Uhlmann, 2018). However, it remains to be seen if these results are directly applicable to mammalian cells since Cdc14 is the primary mitotic exit phosphatase in budding yeast (Stegmeier and Amon, 2004) and current evidence suggests that this role is not conserved in human cells (Berdougo et al., 2008; Mocchiari et al., 2010). Furthermore, Cdc14 regulation through the FEAR and MEN pathways is highly divergent from the CDK1-mediated inhibition of PP1 and PP2A-B55, therefore timing properties are not directly comparable between yeast and human cells.

CDK1-inactivation and the loss of chromosome cohesion are required to initiate mitotic exit. This is achieved through the APC/C-mediated degradation of cyclin B and securin, respectively (Funabiki et al., 1996; King et al., 1995; Sudakin et al., 1995). The APC/C is a multi-subunit E3-ubiquitin ligase (Hutchins et al., 2010;

Zachariae et al., 1996) which requires the presence of a coactivator, either CDC20 or CDH1, to ubiquitinate substrates (Kramer et al., 1998; Visintin et al., 1997). Both CDC20 and CDH1 make similar contacts with the APC/C, however only CDC20 binding is promoted by mitotic APC/C phosphorylation (Kraft et al., 2003; Zhang et al., 2016). APC/C co-activator complexes recognise substrates through degron motifs, typically the D-box, whose presence is necessary and sufficient for APC/C-mediated ubiquitination of particular substrates (Glotzer et al., 1991; King et al., 1996). Alternatively, proteins can be targeted through the KEN box, either alone or in combination with a D-box (Burton and Solomon, 2001; Passmore et al., 2003; Pflieger and Kirschner, 2000). Alternative degron motifs have also been identified such as the ABBA motif, found in cyclin A, BUBR1 and BUB1, which is recognised by human CDC20 (Davey and Morgan, 2016; Di Fiore et al., 2015; Di Fiore and Pines, 2010; Lu et al., 2014).

A further complication when analysing mitotic exit is the potential contribution of protein synthesis. Mitotic factors, including cyclin B, Aurora and Polo kinases and mitotic spindle factors, are predominantly synthesised in G2 (Whitfield et al., 2002). APC/C activity is then required to ensure that these proteins are degraded in a timely manner during mitotic exit. In a 2011 review, 55 human proteins were identified as APC/C substrates (Meyer and Rape, 2011). During mitosis, the spindle assembly checkpoint promotes assembly of the mitotic checkpoint complex (MCC) from MAD2, BUB3, BUBR1 and CDC20 at unattached kinetochores to inhibit APC/C activity against anaphase substrates (Fang, 2002; Tipton et al., 2011). CDC20 is unique amongst the MCC proteins in that it is simultaneously a co-activator and inhibitor of the APC/C (Alfieri et al., 2016; Izawa and Pines, 2015; Yamaguchi et al., 2016). Once the checkpoint is satisfied and the MCC is disassembled APC/C<sup>CDC20</sup> becomes

active, leading to ubiquitination and proteasomal degradation of many substrates. It has been proposed that continual synthesis and degradation of CDC20 is required for rapid APC/C<sup>CDC20</sup> activation upon checkpoint satisfaction (Foe et al., 2011; Foster and Morgan, 2012; Nilsson et al., 2008; Varetta et al., 2011; Wang et al., 2017). This degradation of CDC20 is dependent on a functional SAC and is mediated by APC15 (Mansfeld et al., 2011; Uzunova et al., 2012). Furthermore, the ubiquitination of CDC20 has itself been suggested to promote MCC disassembly (Kallio et al., 1998); (Reddy et al., 2007).

The MCC ensures ordered cyclin proteolysis during mitosis, permitting APC/C activity against cyclin A during mitosis whilst preventing ubiquitination of cyclin B (Di Fiore et al., 2015; Jacobs et al., 2001). It has also been proposed that ordered proteolysis contributes to a proper mitotic exit (Lindon and Pines, 2004). The APC/C<sup>CDH1</sup> complex can form as cyclin B is degraded and CDK1 activity falls in an APC/C<sup>CDC20</sup>-mediated manner (Kramer et al., 2000; Kotani et al., 1999; Visintin et al., 1997). APC/C<sup>CDH1</sup> can then target CDC20 for destruction (Pfleger and Kirschner, 2000). This rapid change in APC/C coactivator alters substrate specificity, contributing to ordered proteolysis during mitotic exit. Once active, APC/C<sup>CDH1</sup> can target cytokinesis regulators, such as Aurora kinases, TPX2, PLK1, anillin and cytoskeletal associated protein 2 (CKAP2) for degradation (Floyd et al., 2008; Lindon and Pines, 2004; Seki and Fang, 2007; Stewart and Fang, 2005; Taylor and Peters, 2008; Zhao and Fang, 2005). It has been suggested that PLK1 is degraded prior to Aurora A (Lindon and Pines, 2004), to ensure proper spindle dynamics and organisation during anaphase (Floyd et al., 2008). Interestingly, few proteins, beside Aurora kinases, have been shown to be completely dependent on APC/C<sup>CDH1</sup> for their destruction (Floyd et al., 2008). Furthermore, depletion of CDH1 stabilises

levels of anillin and CKAP2 but does not affect the kinetics of mitotic exit or cytokinesis (Garcia-Higuera et al., 2008; Seki and Fang, 2007), raising questions regarding the importance of switching coactivators during mitotic exit in human cells. Global proteomic analysis of meiotic exit in *Xenopus* eggs, which lack CDH1, showed that proteolysis was limited to a few key rapidly degraded targets such as cyclin B1, B2 and securin and that dephosphorylation proceeded normally in this system (Presler et al., 2017). Additionally, proteasome inhibition, using MG-132, did not alter the rate of dephosphorylation of PPP1CA-pT320 or PRC1-pT481 in HeLa cells following CDK inhibition (Cundell et al., 2013). These latter results suggest that APC/C-dependent proteolysis fulfils a more limited role than previously thought and may be more important for resetting cell status in G1 rather than implicitly impacting the order and timing of events during mitotic exit.

Here, we use high-resolution mass spectrometry to show that proteolysis of the crucial APC/C substrate, cyclin B1 (CCNB1), triggers a graded series of dephosphorylations whose rate is encoded into the system at the level of individual phospho-sites. We show that one important general aspect of this is that PPPs will more readily dephosphorylate phospho-threonine in a basic environment, both at the level of an individual phosphatase, PP1, or the system as a whole.

Significantly, these dephosphorylations proceed normally in the absence of APC/C activity following CDK inhibition, demonstrating that ordered proteolysis and protein synthesis alone are insufficient to co-ordinate the events of mitotic exit. Instead we suggest that the main orchestration of mitotic exit events is mediated by regulated dephosphorylation.



## RESULTS

### **Ordered dephosphorylation, not proteolysis, is the dominant mode of anaphase regulation**

To gain a more detailed quantitative understanding of mitotic exit it was important to be able to follow changes in both protein abundance and phosphorylation state *in vivo* with high temporal resolution. To achieve this, HeLa cells were synchronised in mitotic prometaphase by washout from nocodazole arrest for 30 min to allow spindle formation and chromosome alignment. To promote entry into anaphase with a high degree of synchrony, CDK1 was then inhibited using flavopiridol and samples taken every 30 sec until 10 min and at increasing intervals up to 60 min ([Figure 1A](#)).

Markers of mitosis and anaphase were followed by Western blot as cells progressed through mitotic exit ([Figure 1A](#)). The use of chemical CDK inhibition to trigger mitotic exit uncouples CDK1 activity from the level of CCNB1, consequently some dephosphorylations take place earlier than under physiological conditions (Cundell et al., 2013; Cundell et al., 2016). This system collapses the characteristic delay seen before dephosphorylation of PP2A-B55 sites, such as PRC1-pT481 ([Figure 1A and B](#)) (Cundell et al., 2013). Following CDK inhibition, both PPP1CA-pT320, an indicator of PP1 activity and PRC1-pT481 are rapidly dephosphorylated with near complete loss of signal by 10 minutes ([Figure 1A-C](#)). This indicates that the inhibition of PP1 and PP2A-B55, respectively, has been relieved. Additionally, the anaphase-specific PLK1 phosphorylation of PRC1-pT602 began to accumulate precociously from 2.5 minutes, as the PRC1-pT481 signal decreased ([Figure 1A and B](#)). Finally, APC/C-dependent proteolysis was observed as highlighted by the decreasing levels of CCNB1 and securin ([Figure 1A and D](#)). Together these markers indicate that the

cells had undergone mitotic exit and progressed into anaphase in an orderly fashion.

Four repeats of these time course samples were processed for mass spectrometry using quantitative di-methyl labelling followed by phospho-peptide enrichment (Boersema et al., 2009). This resulted in the high confidence identification of 4813 proteins and 18,675 phosphorylation sites ([Figure 2-source data 1 and 2](#)). Global trends in the data were identified through a clustering analysis, grouping proteolysis or dephosphorylation events into four categories: early, intermediate, late or stable. Following processing, 2165 proteins and 4,632 phospho-sites were clustered ([Figure 2A-D](#)). Reference substrates of CCNB1, PRC1 and PRC1-pT481 show that the proteomic data accurately recapitulates that obtained by Western blot ([Figure 2E-G](#)).

Strikingly, given the number of APC/C substrates and proteins synthesised for mitosis, the vast majority of the total proteome was stable during the time window observed ([Figure 2A](#)). In fact, the only protein seen to be degraded rapidly using this global proteomic approach was CCNB1 ([Figure 2E](#)). Detection of securin was inconsistent due to the frequency and distribution of basic residues cleaved during a tryptic digest. A small number of proteins, such as PLK1, were degraded slowly during the time window analysed while the only proteins which demonstrated an intermediate rate of proteolysis were Aurora A and its coactivator TPX2. To corroborate these findings previously published proteomic data, generated by the lab using MPS1-inhibition to trigger mitotic exit rather than CDK-inhibition (Hayward et al., 2019), was also inspected for changes at the protein level and subjected to the same clustering analysis as above ([Figure 2-figure supplement 1 and source data 3](#)).

In this data set CCNB1 degradation followed more typical delayed sigmoidal kinetics during mitotic exit ([Figure 2-figure supplement 1E](#)), whilst the proteome as a whole remains stable following MPS1 inhibition, exemplified by PRC1 ([Figure 2-figure supplement 1A and F](#)). This means that under conditions of either normal (MPS1i) or collapsed mitotic exit (CDKi) the detectable fraction of the proteome was stable for the window observed. This fitted with expectations, as only the degradation kinetics should change between the two conditions, rather than the entire substrate specificity of the APC/C. Of all the detected proteins only CCNB1 and securin (Western blot only) exhibited rapid enough destruction to impact the events of anaphase. Importantly, in unperturbed cells, these degradation events occur prior to the onset of anaphase. These data would question the role of ordered proteolysis in the regulation of mitotic exit, beyond triggering anaphase entry.

By contrast, when similarly analysed, dephosphorylations clustered neatly into four groups; early, intermediate, late and stable ([Figure 2B](#)). Sequence-logo analysis of each cluster highlights a clear trend in phospho-site sequence characteristics. Early dephosphorylations, with an average half-life of 5 min, were strongly enriched for phospho-threonine over phospho-serine ([Figure 2C, early](#)). Surrounding the phospho-site, a mild enrichment of basic residues and a strong de-enrichment of acidic residues could be observed ([Figure 2C, early](#)). Intermediate dephosphorylations, with a typical half-life of 13.5 min, were also de-enriched of acidic residues, albeit to a lesser extent than the early cluster ([Figure 2C, intermediate](#)). Late dephosphorylations with an average half-life of 46 min showed little dominant positive or negative selections, save for a mild selection against phospho-threonine ([Figure 2C, late](#)). Stable phosphorylation, defined as sites with a half-life greater than 60 min, had a very strong enrichment of acidic residues

surrounding the phospho-site and some enrichment for phospho-serine (Figure 2C, stable). Phospho-threonine and basic residues were modestly selected against within the stable population. This analysis shows a gradual and continuous trend consistent with the published literature whereby the more acidic a phosphorylation site, the slower its dephosphorylation (McCloy et al., 2015; Touati and Uhlmann, 2018). Additionally, all else being equal, a phospho-threonine is more likely to be dephosphorylated rapidly than a phospho-serine (Cundell et al., 2016; Hein et al., 2017).

A clustering analysis of data generated following MPS1 inhibition yielded the same trends in sequence characteristics seen after CDK1 inhibition (Figure 2-figure supplement 1B and C). Only two clusters of dephosphorylation could be observed in this analysis (Figure 2-figure supplement 1B, intermediate and early). Since MPS1 inhibition causes a gradual decline in CDK1 activity, via CCNB1 destruction, many dephosphorylations will be slower under these conditions, as demonstrated by the profiles of PPP1CA-pT320 and PRC1-pT481 (Figure 2-figure supplement 1G). Two stable clusters of phospho-sites could be observed, one of which displayed the sequence traits expected (Figure 2-figure supplement 1C, stable 1). The second stable cluster contained noisier data, as seen by an increase in randomly scattered black marks, representative of missing values (Figure 2-figure supplement 1C, stable 2). This led to a logo without any apparent preferences. Taken together these data suggest that it is ordered dephosphorylation and not proteolysis which is responsible for anaphase regulation following mitosis. Furthermore, the rate of these dephosphorylations is encoded into the system through the amino acid sequence characteristics surrounding each phospho-site.

## The majority of APC/C-mediated proteolysis occurs downstream of anaphase

Although over 2000 proteins were reliably quantified across the time course, it remained possible that lower abundance proteins were being degraded but could not be detected due to instrument limitations. Therefore, high pH fractionation was used to increase the depth of the total-proteome, using samples taken every 10 minutes across two repeats of the time course. With this approach over 5600 proteins were identified, with 3748 being reliably quantitated (Figure 3-source data 1). The profile of CCNB1 in the fractionated samples (Figure 3-figure supplement 1C) was consistent with Western blotting and our initial proteomic approach (Figure 1D and 2E, respectively). The greater sensitivity afforded by high pH fractionation enabled the detection of lower abundance, lysine-rich proteins such as CDC20 and the DNA replication licensing regulator geminin (GMNN) (Figure 3-figure supplement 1D and E). Importantly, the clustering analysis showed that the majority of the proteome was stable even at greater depth (Figure 3-figure supplement 1A). Additionally, ~50% CDC20 was still present one hour after CDK inhibition. This would suggest that the switch from CDC20- to CDH1- dependent degradation may not be as clear as was once thought. The representation of APC/C substrates and their half-lives, from within this dataset, was then assessed. Firstly, a review listed 55 human proteins as substrates of the APC/C (Meyer and Rape, 2011), 34 of which were identified here (Figure 3A). Additionally, of the 210 genes shown to demonstrate G2/M or M/G1 expression patterns (Whitfield et al., 2002), 120 are identified in the fractionated data set (Figure 3A). To ensure unbiased classification of whether a protein was degraded during the experimental window, a threshold value was selected. Since the events of anaphase happen on a timescale of minutes this threshold was set to a half-life of 60 minutes. When analysing both reference lists, only five proteins meet

the criterion of APC/C-mediated anaphase degradation: Aurora A, CENPF, CCNB1, GMNN and securin (Figure 3B, green triangles). Indeed, CCNB1, GMNN and securin are degraded prior to anaphase onset in unperturbed cells, while proteolysis of Aurora A and CENPF occurred too slowly to impact Anaphase A. If this half-life threshold was relaxed to 2 h to include proteolytic events occurring in telophase or early G1, an additional 11 proteins would meet the degradation criteria. (Figure 3B, left of orange line). With the exception of GMNN and securin, these 16 degraded proteins fall into two categories; either SAC, kinetochore and centromere proteins or mitotic spindle factors. A small number of proteins such as PRC1, HEC1 and BUB1 had half-lives between 2-5 hours placing their proteolysis in the subsequent G1 phase (Figure 3B, left of orange line). The remaining 89 proteins all had half-lives greater than 5 hours. This additional analysis supports the conclusion that only a small portion of the mitotic proteome is subject to degradation and very few of these proteolytic events could impact the order of events in anaphase.

### **Protein synthesis is not required for progression through the metaphase-anaphase transition**

It has been proposed that continued synthesis of key mitotic proteins including CDC20 and CCNB1 is essential to SAC function (Nilsson et al., 2008; Varetta et al., 2011). Protein synthesis could therefore impact mitotic exit, potentially masking APC/C activity towards many substrates. To assess the contribution of protein synthesis to mitosis and mitotic exit, CRISPR-tagged CCNB1-GFP cells (Alfonso-Perez et al., 2019) were followed by live cell microscopy. Cycloheximide (CHX), an inhibitor of protein synthesis, or DMSO were added just prior to cells entering mitosis. In control cells the level of CCNB1 continued to climb throughout the experiment until cells entered mitosis (Figure 4A and B, upper panels). CCNB1

levels peaked and briefly plateaued before rapidly decreasing. These features indicated that the cells had entered mitosis, satisfied the checkpoint and entered anaphase. Importantly, the presence of a plateau indicates that levels of CCNB1 do not continue to rise throughout mitosis. Upon addition of CHX, levels of CCNB1 ceased to increase, confirming the activity of the drug (Figure 4A and B, lower panels). As such, many of the cells imaged did not have the necessary levels of CCNB1 to enter mitosis. In these cells the CCNB1 fluorescence only gradually declined, more indicative of bleaching than of active degradation (Figure 4B, lower panel). Cells which had accumulated adequate levels of CCNB1 before the addition of CHX did enter mitosis, and the length of mitosis was compared to that of control cells. There was no statistically significant difference in the mean time spent in mitosis following addition of CHX (Figure 4C). This suggests that neither mitotic progression nor SAC function is perturbed in the absence of protein synthesis.

Checkpoint function was then interrogated directly under conditions of inhibited protein synthesis by treating these cells simultaneously with nocodazole and either DMSO or CHX. In control cells, CCNB1 fluorescence increased until mitotic entry followed by a small plateau, after which the fluorescence gradually decreased (Figure 4-figure supplement 1A and B, upper panels). Since the cells were arrested in mitosis during imaging (Figure 4-figure supplement 1A), this decrease in signal is again likely due to fluorophore bleaching rather than protein degradation. When treated with CHX and nocodazole, CCNB1 fluorescence began decreasing immediately following drug addition, at a similar rate to that seen in control cells (Figure 4-figure supplement 1A and B). Importantly, the cells in both groups were still arrested in mitosis 360 min after drug addition, meaning CCNB1

and CDC20 must still be sufficiently present to permit checkpoint function (Figure 4-figure supplement 1A, lower panel).

Changes in protein level were then followed by Western blot in checkpoint-arrested cells. BUBR1 and MAD2 were both stable for two hours following inhibition of protein synthesis (Figure 4-figure supplement 1C and D). During this period CCNB1 levels fell to 80% of their starting value, however the levels were barely different from the control during the first 60 min (Figure 4-figure supplement 1C-E). Across the two hours approximately 50% of CDC20 was destroyed (Figure 4-figure supplement 1F). This is inconsistent with the published high rates of protein synthesis and turnover during mitosis in mammalian cells (Nilsson et al., 2008; Varetta et al., 2011). However, those published results were obtained using a CDC20 antibody directed against an epitope within the C-terminal 50 amino acids of the protein. This region is ubiquitinated in an APC15-dependent manner under conditions of checkpoint activation (Uzunova et al., 2012), therefore the rapid degradation observed is likely a consequence of epitope masking (Nilsson et al., 2008; Varetta et al., 2011). Importantly, the changes in protein level here were followed over a 120 min period, whereas a normal mitosis typically takes ~60 min. These results suggest that ongoing protein synthesis and turnover is not essential for SAC-dependent arrest during mitosis or progression into anaphase.

Next it was assessed whether protein synthesis was required to complete anaphase A and initiate cytokinesis. The CCNB1-GFP cells treated with CHX did not display any apparent structural abnormalities during this time window (Figure 4A). Furthermore, there was no difference found in the time taken to begin furrow ingression following chromosome separation between the control cells and the CHX-treated cells, both having means of ~9 minutes (Figure 4-figure supplement 1F). To



confirm these results, mitotically arrested HeLa cells were pre-treated with CHX prior to the addition of CDK inhibitor. Degradation of proteins during mitotic exit was then followed by Western blotting and was found to be unaffected by inhibition of protein synthesis (Figure 4D). This was confirmed by quantification of CDC20 and CCNB1 (Figure 4E and F). Furthermore, if continued protein synthesis was critical to a normal mitosis it would follow that a 25 min treatment with CHX, equivalent to roughly half a normal mitosis, should cause a measurable decrease in protein levels. However, no difference was observed when comparing the levels of different mitotic proteins in the -25 and 0 min timepoints in either control or synthesis-inhibited conditions (Figure 4D). Critically, dephosphorylation of PRC1-pT481 was unaffected by the addition of CHX (Figure 4D). These results suggest that protein synthesis is not required for normal cellular function during mitosis and anaphase. Furthermore, our results demonstrate that continued protein synthesis into anaphase is insufficient to explain the observed stability of the total proteome.

### **Anaphase dephosphorylations are unperturbed by the absence of APC/C activity**

Our data shows that beyond the initial destruction of CCNB1, GMNN and securin, protein level homeostasis is not responsible for regulating the events of anaphase. If regulation of anaphase is indeed dominated by phosphatase activity then substrate dephosphorylation should be unaffected by the absence of proteolytic activity (Cundell et al., 2013). Owing to the presence of many ubiquitin ligases within the cell, direct inhibition of the proteasome, using MG-132, is not specific enough to test this. Therefore, the APC/C inhibitors APC inhibitor (apcin) and pro-tosyl-L-arginine methyl ester (pro-TAME) were used. These have been shown to function synergistically, providing optimal results when used together (Sackton et al., 2014).

An initial low-resolution time course was carried out to assess dephosphorylation under conditions of APC/C inhibition. Cells were prepared as before, and pre-treated with either DMSO, APC/C inhibitors alone or APC/C and proteasome inhibitors (40  $\mu$ M MG-132) prior to CDK inhibition. The functional consequences of these treatments are highlighted in [Figure 5A](#). CCNB1 was completely degraded by 20 min in control conditions and was fully stabilised when both the APC/C and proteasome were inhibited ([Figure 5B and C](#), [green and orange lines](#)). Complete stabilisation was not achieved through APC/C inhibition alone ([Figure 5C](#), [blue line](#)). However, 80% of CCNB1 was stabilised by the combined apcin/pro-TAME treatment during the first 20 min window after CDK1 inhibition in which CCNB1 is normally fully degraded. This trend is also evident in the stability of securin and TPX2. Furthermore, Aurora A, whose degradation is CDH1-dependent, was largely stabilised by the addition of APC/C inhibitors ([Figure 5D](#), [blue line](#)). The changes in CDC20 level seen here are consistent with mass spectrometry data whereby ~50% is degraded over 60 min ([Figure 3-figure supplement 1E](#); [Figure 5B and E](#), [green line](#)). Interestingly, whilst the CDC20 signal was stabilised by proteasome inhibition ([Figure 5E](#), [orange line](#)), its levels were not stabilised by APC/C inhibitors alone ([Figure 5E](#), [blue line](#)). This suggests that the CDC20 ubiquitination required for proteolytic degradation occurred prior to drug addition within this experiment and is consistent with this occurring while the SAC is active, in an APC15-dependent manner (Mansfeld et al., 2011; Uzunova et al., 2012). This is, however, inconsistent with CDC20 degradation being dependent on APC/C<sup>CDH1</sup> activity. Predictably, the levels of CDH1 were stable throughout the time course, as CDH1 is necessary for APC/C activity into the next G1 phase.

Importantly, under all conditions dephosphorylation of PP1 and PP2A-B55 substrates could be seen to occur as rapidly as in control cells, as indicated by the dephosphorylation kinetics of PPP1CA-pT320 and PRC1-pT481 (Figure 5B and E). These results support the hypothesis that phosphatase activity is responsible for the bulk of anaphase regulation. Moreover, they suggest that the only proteolytic event necessary for mitotic exit is the degradation of CCNB1, to inactivate CDK1 and relieve separase inhibition. However, a more in-depth analysis was necessary to see if this holds true on a global level. This was achieved by combining the established mass spectrometry protocol and high-resolution time course with the chemical inhibition of the APC/C described above.

Again, APC/C inhibition resulted in stabilisation of CCNB1 and securin, especially during the first 20 min following CDK inhibition (Figure 6D and Figure 6-figure supplement 1). Interestingly, while securin migrated as a single band under control conditions a smear above a single band was observed when APC/C was inhibited (Figure 5B and Figure 6-figure supplement 1). This could indicate multiple modification states of securin, necessary for ubiquitination, which are not normally observable under control conditions (Hellmuth et al., 2014). Levels of CDC20 were again seen to fall slowly irrespective of APC/C inhibition (Figure 6-figure supplement 1A and B), supporting the view that this is not rapidly targeted by the APC/C early in mitotic exit. As before, dephosphorylation of PPP1CA-pT320 and PRC1-pT481 was equally rapid in control or APC/C-inhibited cells (Figure 6E and F and Figure 6-figure supplement 1). These samples were then subjected to the same MS analysis previously described, resulting in the clustering of 2950 phospho-sites.

It was found that five clusters gave rise to the most sensible groupings of phospho-site behaviour across both time courses (Figure 6-source data 1). This

allowed a category to be included for noisier data which was not quantified equally well in both conditions (302 phospho-sites, not shown). The four remaining clusters followed the same pattern observed in the previous analysis (Figure 6A and B, Figure 2), with phospho-site groupings of early, intermediate, late and stable. Furthermore, the average half-life of phospho-sites within each cluster was very similar in the control and APC/C inhibited conditions (Figure 6B). Predictably, the sequence logo of each of these clusters very closely matched those seen in analysis of mitotic exit under conditions where the APC/C is active (Figure 2B). This indicates that inhibition of APC/C-dependent proteolysis neither prevents dephosphorylation during mitotic exit nor affects the order in which they occur. Furthermore, it appears that the minimal proteolytic requirement for a successful mitotic exit is the degradation of CCNB1. Together these results are consistent with dephosphorylation, rather than proteolysis, determining the order of events during anaphase.

### **PP1 and PP2A-B55 share a preference for basic phospho-threonine sites**

Previous work has demonstrated that the preference of PP2A-B55 towards basic substrates impacts the order of events in anaphase (Cundell et al., 2016). In the global analysis presented here the most basic phospho-sites were dephosphorylated the most rapidly, suggesting that a preference for basicity is an inherent characteristic of PPPs and a general principal of phosphatase-mediated anaphase regulation. To test whether PP1 shares this same preference, samples from a high-resolution analysis of mitotic exit under PP1 depleted conditions (Bancroft et al., 2020) were subjected to mass spectrometry analysis. To identify PP1-dependent clusters, the average phospho-site half-life was calculated for both control and PP1 depletion within each cluster. Clusters where phospho-site half-life in the PP1

depleted condition was >50% longer than that of control were taken forward for further analysis. Depletion of PPP1CB had very little effect on bulk dephosphorylation over time and no clusters were found to have a half-life >50% difference from control ([Figure 7-source data 1](#)). This supports a predominantly non-mitotic role for PPP1CB, consistent with phenotype data (Takaki et al., 2017; Zeng et al., 2010).

The clustering comparison of 2963 phospho-sites from control and PPP1CA/C depleted samples was empirically found to require seven clusters, five of which exhibited a longer half-life following depletion ([Figure 7A and Figure 7-source data 1](#)). These half-lives were all doubled or extended to beyond the window of the experiment and corresponded to the majority of non-stable phospho-sites observed within the analysis. Unsurprisingly, some of these sites are known PP2A-B55 substrates, as PP1 lies upstream of PP2A-B55 activation (Cundell et al., 2016; Rogers et al., 2016). Nevertheless, many of these sites are not currently assigned as substrates of a particular phosphatase, indicative of the mitotic function of PPP1CA/C suggested in the literature (Wu et al., 2009). The sequence characteristics of these clusters followed the trends observed previously ([Figure 7A](#)). Due to the number of potential PP1 holoenzymes the sequence characteristics seen here are indicative of the general preferences of PP1 catalytic subunits. Moreover, these results show that the preference for phospho-threonine in the absence of negative charge may be a general property of PPP holoenzymes not just PP2A-B55.

## **DISCUSSION**

### **Proteolytic and phosphatase control of mitotic exit**

The combination of high temporal-resolution mass spectrometry with the cell biological techniques used in this research provides insights into cell cycle control. These data show that proteolysis plays a crucial role initiating the mitotic exit transitions whereas phosphatase activity is required for downstream regulation of order within the system. Therefore, the following model is proposed with regard to how CDK-inhibited phosphatases and the APC/C co-operate to ensure orderly progression through mitotic exit (Figure 8). Proteolysis of a single substrate, cyclin B, triggers a graded series of dephosphorylations whose rate is encoded into the system at the level of individual phospho-sites (Bouchoux and Uhlmann, 2011). Due to differential regulation by CDK1-cyclin B1, in mammalian cells multiple thresholds of cyclin B degradation ensure ordered activation of CDK-inhibited phosphatases which imparts further timing properties to the system. Once both PP1 and PP2A-B55 are active, phosphorylations at thousands of sites can be removed helping to reset the system for the next cell cycle. The order of these dephosphorylations, and therefore anaphase events, is determined by the suitability of each substrate for interactions with a phosphatase active site, dependent upon the chemical and physical properties of the amino acid constituents of each phospho-site (Figure 8). Finally, late in telophase the APC/C targets many mitotic proteins for degradation, preparing the cell for the subsequent G1 phase.

### **APC/C fulfils two temporally distinct roles during mitotic exit**

The very different rates of proteolysis between early and late APC/C substrates described here supports the view that CDC20 and CDH1 globally satisfy two

different requirements of mitotic exit (Figure 3 and 8). Firstly, creation of a cell state free from CDK-cyclin activity, through degradation of CCNB1, to permit mitotic exit and phosphatase activation. Although, securin and GMNN were also observed as early substrates of the APC/C, we would argue that degradation of CCNB1 is the primary function of the APC/C at this time. Cells can survive without securin, as CCNB1 can inhibit separase both directly and through promoting CDK1 activity (Gorr et al., 2005; Huang et al., 2005; Stemmann et al., 2006). Moreover, loss of CDK activity is required for cells to capitalise on the DNA replication licensing window created during anaphase, between the sequential degradation of GMNN and CDT1 (Ballabeni et al., 2004; Clijsters et al., 2013). The second function of the APC/C is to promote destruction of mitotic factors and reset the cellular state for the subsequent cell cycle. A simple view would be to separate these functions based on APC/C coactivator, CDC20 for cyclin destruction and CDH1 for resetting cell status. This is supported by a proteomic analysis of meiotic exit in *Xenopus* eggs which found that wide-spread dephosphorylation was triggered by the degradation of a small number of proteins, typified by the APC/C<sup>CDC20</sup> substrates: CCNB1/2, securin and GMNN (Presler et al., 2017). These eggs lack CDH1, therefore typical APC/C<sup>CDH1</sup> substrates such as Aurora kinases were, unsurprisingly, stable. The absence of CDH1-dependent degradation is thought to help bypass G1 and promote rapid divisions within the early embryo (Presler et al., 2017), highlighting a role for APC/C<sup>CDH1</sup> activity in promoting the formation of a stable G1 state. Nevertheless, APC/C<sup>CDC20</sup> is required for the degradation of BUBR1, CENPF and PLK1 late in anaphase (Choi et al., 2009; Floyd et al., 2008; Gurden et al., 2010). Moreover, we show that CDC20 is not rapidly degraded during mitotic exit (Figure 5, Figure 3-figure supplement 1 and Figure 6-figure supplement 1) suggesting that both CDC20

and CDH1 function during late anaphase and telophase to degrade mitotic proteins (Figure 8). At present it is unclear how the APC/C promotes such distinct proteolytic kinetics between early and late substrates.

### **Proteolytic regulation of CDC20 during mitotic exit**

CDC20 is unique in that it functions as both an activator and inhibitor of the APC/C and is therefore subject to complex regulation through post-translational modification. Previous work suggested that continuous synthesis and degradation of CDC20 was necessary to maintain the mitotic state and allow for rapid APC/C activation following SAC silencing (Foe et al., 2011; Foster and Morgan, 2012; Nilsson et al., 2008; Varetta et al., 2011; Wang et al., 2017). The data presented here argue against a requirement for protein synthesis during mitosis in mammalian cells (Figure 4 and Figure 4-figure supplement 1). Inhibition of protein synthesis did not cause cells to leave mitosis prematurely, nor did this inhibition override checkpoint-mediated mitotic arrest. Evidence suggests that in *S. cerevisiae*, APC/C<sup>CDC20</sup> activity inversely correlates with levels of CDC20 transcription (Wang et al., 2017). Nevertheless, in mammalian cells there is no known feedback between APC/C activity and protein expression, which would be necessary to ensure the correct levels of CDC20 and cyclin B synthesis are maintained in spite of continued destruction. Likewise, mammalian cells inhibit bulk protein synthesis at mitotic entry whilst budding yeast manufacture proteins throughout their cell cycle (Polymenis and Aramayo, 2015). These variations in regulation of protein expression, alongside the fundamental differences between open and closed mitosis could explain the divergent requirements for continued CDC20 synthesis during mitosis in budding yeast and mammalian cells.



CDC20 degradation is thought to be a consequence of APC/C switching coactivators to CDH1, following CDK1 inactivation. Here we show that CDC20 degradation was independent of ongoing APC/C activity during mitotic exit, suggesting that the necessary ubiquitination of CDC20 occurs prior to checkpoint silencing (Figure 5 and Figure 6-figure supplement 1). These findings are consistent with CDC20 being ubiquitinated as part of APC/C<sup>CDC20</sup>-bound MCC complex (Foe et al., 2011; Mansfeld et al., 2011; Uzunova et al., 2012). Given that ~50% of CDC20 still remained one hour after CDK inhibition, it is important to understand whether any particular pools of CDC20 are preferentially degraded during mitotic exit.

### **CDK1-inhibited phosphatases are activated with distinct timings to co-ordinate the events of early anaphase**

PP1 and PP2A-B55 carry out distinct roles to ensure proper passage into mitotic exit; APC/C activation and initiation of cytokinesis, respectively (Bancroft et al., 2020; Cundell et al., 2013; Cundell et al., 2016; Wu et al., 2009). These functions explain the requirement for two CDK1-inhibited phosphatases that are divergently regulated. Direct CDK1 inhibition ensures that the bulk of PP1 is inactive, allowing a global increase in phosphorylation status upon mitotic entry (Wu et al., 2009). As cyclin B is degraded, PP1 rapidly responds globally to the changes in CDK1 activity becoming dephosphorylated (Figure 1, 2 and Figure 2-figure supplement 1) (Wu et al., 2009). PP2A-B55 inhibition is maintained during this period by the BEG pathway. Once dephosphorylated, PP1 can then oppose the CDK1 phosphorylation of MASTL and initiate PP2A-B55 activation (Rogers et al., 2016). This would create two waves of phosphatase activation to co-ordinate the early events of mitotic exit. This is reflected in the mass spectrometry time course data following MPS1 inhibition. PPP1CA-pT320 dephosphorylation commenced ~5 min earlier than the model

PP2A-B55 substrate PRC1-pT481. Moreover, the half-life of PRC1-pT481 was ~2 min longer than that of PPP1CA-pT320 (Figure 2-figure supplement 1G). These data are consistent with the delay of ~2-4 min observed between chromosome separation and commencing central spindle formation (Cundell et al., 2013). Once activated, both PP1 and PP2A-B55 lead to the dephosphorylation of many substrates during mitotic exit (Figure 8) (Cundell et al., 2016; Wu et al., 2009). Dephosphorylation rate correlates with the sequence characteristics of each substrate and this trend applies to the specificity of individual phosphatases PP1 (Figure 7A) and PP2A-B55 (Cundell et al., 2016), as well as to the cell as a whole (Figure 2 and Figure 2-figure supplement 1). The molecular basis for this may relate to the conserved acidic groove found in PP1 and PP2A catalytic subunits close to the active site, providing a molecular basis for the discrimination against more acidic phospho-sites (Figure 8). The negative charge provided by acidic residues in addition to a phosphate group would be electrostatically repelled from this binding groove, preventing efficient substrate binding and dephosphorylation (Figure 8).

Regulated phosphatase activities and highly selective proteolysis thus initiate and choreograph the rapid series of events which occur during mitotic exit and ensure that faithful inheritance of genetic material is coupled to the formation of new cells. Our data provide evidence in support of this conclusion and will support future studies in this area.

## **ACKNOWLEDGEMENTS**

We thank Ulrike Gruneberg and Elena Poser for discussion and comments on the manuscript.

JH was supported by a Wellcome Trust PhD award and a Cancer Research UK program grant award (C20079/A15940) to FAB.

The authors declare no competing financial interests.

## MATERIALS & METHODS

### Reagents and Antibodies

Standard lab reagents and stocks were purchased from Sigma Aldrich, Thermo Scientific and VWR. Inhibitors and drugs were bought from Tocris (flavopiridol, 5 mM; apcin, 50 mM; pro-TAME, 20 mM), Cell signalling (cycloheximide, 100 mM), CalBiochem (nocodazole, 200 µg/µl; taxol, 200 µg/µl; MG-132, 20 mM), Sigma (protease inhibitor cocktail C, phosphatase inhibitor cocktail 3) and resuspended in DMSO. Thymidine was purchased from CalBiochem and resuspended in sterile Millipore filtered water to a concentration of 100 mM. Protein concentrations were measured by Bradford assay using Protein Assay Dye Reagent Concentrate (Bio-Rad Laboratories).

Rabbit antibodies against PLK1, PRC1 and PRC1-pT602 were described previously (Neef et al., 2007; Neef et al., 2006). The MAD2 antibody was raised in sheep (Scottish Blood Transfusion Service) using full length human 6His-MAD2 expressed in bacteria and coupled to KLH as the antigen. The serum was affinity-purified using GST-tagged MAD2. The commercial antibodies used were Aurora A (Cell Signalling; 4718S), Aurora B (BD Transduction labs; 611083), BUBR1 (Bethyl; A300-386A), CDC20 (Proteintech; 10252-1), CDH1 (Santa Cruz; sc-56312), Cyclin B1 (Millipore; 05-373), PPP1CA (Bethyl; A300-904A), PPP1CA-pT320 (AbCam, ab62334), PRC1-pT481 (AbCam; EP1514Y/ab62366), securin (AbCam; ab79546), TPX2 (AbCam; ab32795), tubulin (Sigma; T6199). For Western blotting, proteins were separated by SDS-PAGE and transferred to nitrocellulose using a Trans-blot Turbo system (Bio-Rad Laboratories). Species-specific secondary antibodies conjugated to horseradish peroxidase (HRP) were obtained from Jackson

ImmunoResearch Laboratories, Inc. and used at 1  $\mu\text{g/ml}$ . All Western blots were revealed using ECL (GE Healthcare) on films.

## **Cell culture**

HeLa cells were grown in DMEM containing 10% [vol/vol] FBS at 37°C and 5% CO<sub>2</sub>. CRISPR/Cas9-edited HeLa cells, with an inserted GFP tag in the C-terminus of the CCNB1 gene product, were grown in the same medium (Alfonso-Perez et al., 2019; Hayward et al., 2019).

## **High-resolution mitotic exit time courses for Western blot and mass spectrometry**

For high-resolution time courses HeLa cells were arrested in mitosis using 100 ng/ml nocodazole treatment for 20 h. Mitotic cells were harvested by shake-off, washed twice in 1x PBS, and once in Opti-MEM, both of which had been pre-equilibrated to 37°C, 5% CO<sub>2</sub>. Cells were counted and resuspended in pre-equilibrated Opti-MEM to give 15,000,000 cells/ml and incubated for 25 min (37°C, 5% CO<sub>2</sub>) to allow cells to rebuild bipolar mitotic spindles. CDK inhibition, using 20  $\mu\text{M}$  flavopiridol, was used to trigger mitotic exit. Where necessary, drugs were added at the start of the 25 min incubation to ensure maximal inhibition prior to the addition of flavopiridol. MG-132, a proteasome inhibitor, was used at 40  $\mu\text{M}$  while apcin and proTAME, APC/C inhibitors, were used at 400  $\mu\text{M}$  and 25  $\mu\text{M}$ , respectively. Cycloheximide (CHX) was used at 100  $\mu\text{g/ml}$ .

For cell lysis, 100  $\mu\text{l}$  samples of cells were taken at each timepoint and added to a tube pre-aliquoted with 200  $\mu\text{l}$  ice cold urea buffer (8 M urea, 100 mM ammonium-bicarbonate (AMBIC)) and immediately snap frozen. The urea buffer was supplemented with protease inhibitors (Sigma cocktail C, 1:250 dilution),

phosphatase inhibitors (Sigma cocktail 3, 1:100 dilution) and 100 nM okadaic acid. For the subsequent di-methyl labelling protocol greater quantities of  $t_0$  sample were required, therefore twelve 300  $\mu$ l aliquots were taken at this time and each added to a tube pre-aliquoted with 600  $\mu$ l ice cold urea buffer. Samples were thawed on ice for 20 min with intermittent vortexing and the concentration determined by Bradford assay. A 50  $\mu$ l aliquot of lysate was taken for Western blotting, added to 25  $\mu$ l of 3x sample buffer and boiled for 5 min prior to loading for Western blots. Typically, 6  $\mu$ g was loaded on each Western blot but when necessary increased to 10  $\mu$ g. Western blot data from time course samples depleted of PP1 subunits were published previously (Bancroft et al., 2020), here the remaining lysate was subjected to trypsin digestion for subsequent proteomic analysis. Low-resolution time courses for Western blot were set up as above, however cells were lysed directly in 3x sample buffer. These samples were diluted 1:2 with 1x sample buffer prior to Western blotting.

### **Digestion of samples for proteomic analysis**

Time-course samples were reduced using 4 mM dithiothreitol (DTT) (Fluka) for 25 min at 56°C followed by alkylation, using 8 mM iodoacetamide (IAA) incubation, in the dark for 30 min. Excess IAA was quenched by addition of DTT to a final concentration of 8 mM. Proteins were digested first with lysyl endopeptidase (Lys-C) (Wako Pure Chemical Industries) for 4 h at 37°C in 8 M urea. The sample was then diluted to 2 M urea, with 50 mM ammonium bicarbonate. Trypsin was then added for 12 h at 37°C. Both enzymes were used at 1:50 ratio relative to the starting amount of protein. Digestions were quenched by acidification with 5% (vol/vol) formic acid (FA).

## **Di-methyl labelling and titanium dioxide phospho-peptide enrichment**

Digested peptides, equivalent to 0.4–1.5 mg of total protein, were bound to SepPak reverse-phase C18-columns (Waters) and subjected to on-column dimethyl labelling as previously described (Boersema et al., 2009). Peptides from all timepoints of the dephosphorylation assay were labelled with cyanoborohydride and deuterated formaldehyde to generate a mass increase of 32 Da per primary amine, referred to as the 'heavy' label. Additionally, 6-8 mg of 0 min timepoint was labelled with formaldehyde and cyanoborohydride to generate a mass increase of 28 Da per primary amine, referred to as the 'light' label; 1-2 mg of 0 min was labelled 'heavy'. After this, 225 µg 'light'- and 'heavy'- labelled peptides were mixed (450 µg total). A 50 µg aliquot was dried on a speed-vac and re-suspended in 5% [vol/vol] formic acid and 5% [vol/vol] DMSO, this represented the total proteome sample. The remainder (400 µg) was subjected to titanium dioxide enrichment.

Phospho-peptide enrichment was performed using microspin columns packed with titanium dioxide (TopTip; Glygen). All spin steps were performed at 550 rpm, equivalent to  $34\times g_{av}$ , for 5 min at room temperature (Eppendorf Centrifuge 5427 R). Columns were washed with 65 µl elution buffer (5% ammonia solution in water), then three times with 65 µl loading buffer (5% [vol/vol] trifluoroacetic acid (TFA), 1 M glycolic acid, 80% [vol/vol] acetonitrile (ACN)). An equal volume of loading buffer was added to the dimethyl labelled peptide mixtures. Phospho-peptides were then bound to the column 65 µl at a time. Following loading, columns were washed once each with loading buffer, 0.2% [vol/vol] TFA acid in 80% [vol/vol] ACN, followed by 20% [vol/vol] ACN. Phospho-peptides were eluted with three washes of 20 µl of elution buffer (5% ammonium solution) into 20 µl of 10% [vol/vol] FA and 10%

[vol/vol] DMSO. This gave a total volume of 120  $\mu$ l of which 20  $\mu$ l was loaded onto the mass spectrometer.

### **High pH fractionation of total proteome samples**

Home-made in stage tips, constructed from five 4G C18 discs (Empore) were used for fractionation, all spins were carried out at 3000x  $g_{av}$ , 3 min unless otherwise specified. Tips were conditioned once each with methanol, 20 mM  $NH_3$ / 80% [vol/vol] ACN and 20 mM  $NH_3$ . Next 25  $\mu$ g of peptides, previously resuspended in 5% FA, 5% DMSO [vol/vol], were loaded on each tip; 1500x  $g_{av}$ , 3 min. The flow-through was reapplied twice more and the final flow-through (FT) retained. Bound peptides were washed with 20  $\mu$ l 20 mM  $NH_3$  and the flow through was then pooled with FT to create the FT/F1 fraction. Peptides were then eluted with 20  $\mu$ l of 20 mM  $NH_3$  buffers of increasing ACN composition (4-80%), which formed fractions F2-7. Samples containing <10% ACN were diluted 1:1 whereas samples with higher concentrations of ACN were diluted to 10% [vol/vol] ACN and 80% of the sample loaded directly on the mass spectrometer. These dilutions were performed with 5% [vol/vol] FA, 5% [vol/vol] DMSO. Fractions FT/F1 and F6-7 were run on 30 min gradients whilst fractions F2-5 were run on 120 min gradients.

### **Online nano-LC and tandem mass spectrometry**

LC was performed using an EASY-nano-LC 1000 system (Proxeon) in which peptides were initially trapped on a 75  $\mu$ m internal diameter guard column packed with Reprosil-Gold 120 C18, 3  $\mu$ m, 120 Å pores (Dr. Maisch GmbH) in solvent A (0.1% [vol/vol] FA in water) using a constant pressure of 500 bar. Peptides were then separated on a 45°C heated EASY-Spray column (50 cm  $\times$  75  $\mu$ m ID, PepMap RSLC C18, 2  $\mu$ m; Thermo Fisher Scientific) using a 3 h linear 8-30% (vol/vol)



acetonitrile gradient and constant 200 nl/min flow rate. Titanium dioxide-enriched peptides were introduced via an EASY-Spray nano-electrospray ion source into an Orbitrap Elite mass spectrometer (Thermo Fisher Scientific). Other samples were injected into Q-exactive mass spectrometers (Thermo Fischer Scientific), using linear 8-30% [vol/vol] acetonitrile gradients between 1 and 3 h in length. For non-fractionated total protein samples, 6 µg was loaded onto the mass spectrometer for a 3 h gradient. Spectra were acquired with resolution 30,000, m/z range 350–1,500, AGC target  $10^6$ , maximum injection time 250 ms. The 20 most abundant peaks were fragmented using CID (AGC target  $5 \times 10^3$ , maximum injection time 100 ms) or ETD (AGC cation and anion target  $5 \times 10^3$  and  $2 \times 10^5$ , respectively, maximum injection time 100 ms, normalised collision energy 35%) in a data-dependent decision tree method for titanium dioxide-enriched peptides. Peaks from other samples were fragmented using CID alone. Peptide identification and quantification of 'heavy' to 'light' phospho-peptide ratios was then performed using MaxQuant (Tyanova et al., 2016a).

### **Analysis of mass spectrometry time course data**

The MaxQuant (Tyanova et al., 2016a) search output was analysed in Perseus (Tyanova et al., 2016b) as follows. Firstly, data was filtered for contaminants; identified by modification site only and identified in the reverse database only. Phospho-peptides were also filtered so that only those with a localisation score of  $>0.75$  remained. Missing values were then replaced. If a single value was missing, it was replaced either by the average of the two adjacent values in the time series or the adjacent value if either the first or last timepoint was missing. However, two or more consecutive missing values were not replaced as these were more likely to represent a true 0 value rather than just a missed quantification. Missing value

replacement was performed in Microsoft Excel. Next, the  $t/t_0$  for each timepoint was averaged across repeat experiments, presuming at least two valid quantification values were observed. Protein groups and phospho-peptides were then filtered for the number of values observed over time, using CCNB1 and PRC1-pT481 as reference profiles of proteolysis and dephosphorylation, respectively. While there were a small number of dephosphorylations that were more rapid than the PRC1-pT481, these were less well understood and would not serve as a reliable reference. At this point any remaining missing values were replaced with the constant value, 0, to enable the clustering algorithm to function correctly. The hierarchical clustering algorithm within Perseus was used, grouping rows into four clusters and outputting a heat map. For clustering a single condition, ten iterations and one restart were allowed, this was increased to 25 iterations and two restarts when comparing two conditions.

When comparing two time-courses under different conditions, cross-mixing was necessary to account for changes in the steady state level of a protein or phospho-peptide. The ratios were extracted from the cross-mixed samples and used to adjust the protein/phospho-peptide ratios relative to control. Following this, a more iterative approach to clustering was required; starting from three, the number of clusters was gradually increased. This was continued until the settings were found which yielded the most clusters without producing random groupings containing very few identifications. Taking this approach allowed the comparison of complex trends found within the large data sets from the two conditions. The heatmap shown was derived from the majority result of the clustering analysis in each case. In the case of PPP1CA/C depleted time course, an error occurred during mixing heavy and light label resulting in all ratios being up-shifted. Therefore, for the purposes of the

clustering analysis comparison with control depletion, a correction factor of 0.25 was subtracted from these ratios so that the  $t_0$  histogram centred around  $\sim 1$ . This correction was applied to all timepoints.

Clusters were exported separately from Perseus. The phospho-site sequences of each individual cluster were then aligned in IceLogo 1.2 software, using the sequences of all phospho-sites clustered as the negative set. For the percentage difference in residue enrichment to be seen in the sequence logo a p-value  $< 0.05$  was required. To determine half-lives for each cluster, the average ratio and standard error of the mean, for each timepoint, was calculated. These were adjusted to a starting ratio of one, plotted and fitted with a non-linear plateau with one phase decay curve in GraphPad Prism. The half-life was the point where the curve fit crossed  $y=0.5$ . Previously published time course proteomic data of mitotic exit under conditions of MPS1 inhibition was reanalysed here as described above (Hayward et al., 2019).

To calculate the half-lives of individual proteins from fractionated time course samples the Maxquant output was filtered and missing values replaced, as above. The ratios for each time point were averaged across experimental repeats and then median subtracted. A correction of 0.85 was added to all ratios to remove any negative values. To account for technical variation in detection between the samples at 50 and 60 min, where the latter value was consistently higher across all proteins, these ratios were averaged. This endpoint value was then used to calculate a percentage of protein remaining after 60 min and converted to a half-life.

## **Time courses assessing contribution of protein synthesis to mitosis**

HeLa cells were seeded at 50,000 cells/well on six well plates in DMEM/FBS and grown for 72 h. These cells were arrested in mitosis using either a 100 ng/ml nocodazole, 20 h or 80 ng/ml taxol, 16 h. Cells for  $t_0$  were collected by shake-off and pelleted 400x  $g_{av}$ , 60 s and then resuspended in 1 ml 1x PBS, 37°C and spun 1000x  $g_{av}$ , 30 s. The washed pellet was lysed in 50  $\mu$ l of 1.5x sample buffer and diluted 1:3 with 1x samples buffer and 5  $\mu$ l loaded for Western blotting. Time was then started following addition of either 100  $\mu$ g/ml cycloheximide or an equal volume of DMSO to the remaining wells. Samples were harvested, as above, at the remaining timepoints.

## **Time lapse imaging for CCNB1-GFP**

Live cell imaging was carried out in 35 mm dishes with a 14 mm No. 1.5 thickness coverglass window (MatTek Corporation). HeLa CCNB1-GFP cells were seeded at 50,000 cells/imaging dish and grown for 48 h before being treated with 2 mM thymidine for 18 hours. The thymidine was removed by washing twice with 2ml 1x PBS and twice with 2 ml DMEM, both pre-equilibrated at 37°C, 5% CO<sub>2</sub>, and imaging was started 9 hours later. Cells were imaged in a chamber maintained at 37°C, 5% CO<sub>2</sub>, using an Olympus Ix81 inverted microscope, 60x 1.42 NA oil immersion objective and an Ultraview Vox spinning disk confocal system (Perkin Elmer). A C9100-EM-CCD camera was used for image capture. Volocity software was used for experimental set up, image projection and exporting. Cells were excited with 488 nm lasers with 100 ms exposures at 4% laser power. Cycloheximide and nocodazole were diluted in 100  $\mu$ l of pre-equilibrated media before being added dropwise when necessary during the experiment, to a final concentration 100  $\mu$ g/ml and 100 ng/ml, respectively.

## **Computational analysis**

Graphs and statistical analysis were performed in GraphPad Prism. All figures were produced using Adobe Photoshop and Illustrator (Adobe CC).

Images were processed in ImageJ. For the CCNB1-GFP fluorescence measurements over time, raw image data was opened in ImageJ using the BioFormats plug-in. Images were then Z-projected to sum the intensity across the volume of the whole cell. A region of interest was drawn around each cell in interphase, this shape was copied to a vacant region of the field of view for a measurement of background signal. The integrated density was then measured in these regions over time and the background subtracted. The corrected values were plotted either as raw intensity.

Densitometric quantification of Western blots was also performed in ImageJ. Intensity was measured in a 60 x 30 px region of interest around each band. An adjacent region was also measured to account for background intensity.

## FIGURE LEGENDS

### **Figure 1. CDK inhibition promotes orderly mitotic exit.**

(A) Mitotically arrested cells were washed out from nocodazole, at 37°C 5% CO<sub>2</sub>, and the CDK inhibitor (CDKi) flavopiridol was added at 0 min. Samples were taken at the indicated timepoints, those used for subsequent mass spectrometry analysis are highlighted in green. Densitometric quantification of repeat experiments, as in (A) (Mean±SEM) is shown for (B) PRC1-pT481 (n=3)/ pT602 (n=2), (C) PPP1CA-pT320 (n=3) and protein level for (D) CCNB1 and securin (n=3).

### **Figure 2. An ordered cascade of dephosphorylation during mitotic exit.**

HeLa cells were arrested in mitosis and mitotic exit triggered as previously described in Figure 1. Heatmap of (A) protein groups (Figure 2-source data 1) or (B) phospho-sites (Figure 2-source data 2) clustered based on trends over time. Time is shown in minutes. (C) Sequence logo analysis showing the relative enrichment of residues in the adjacent cluster from (B). The number of phospho-sites and average half-life for each cluster is indicated. (D) Key linking heatmap colour with observed ratio. Quantitative ratio of (E-F) CCNB1 and PRC1 protein level (n=3) or (G) PRC1-pT481 phosphorylation (Mean±SEM, n=4).

### **Figure 3. Selective proteolysis of cyclin B, geminin and securin in anaphase A.**

(A) Venn diagram comparison of mitotically expressed genes and validated APC/C substrates with proteins identified here by mass spectrometry. The reference lists were obtained from Whitfield et al., 2002 and Meyer et al., 2011, respectively. Numbers indicate how many identifications are in each region. (B) Proteins identified

by mass spectrometry plotted according to the percentage of protein remaining 60 min after CDK inhibition (Figure 3-source data 1). Corresponding Western blot samples were used for the analysis of securin levels following CDK inhibition. Vertical lines indicate various set half-lives for degrading proteins. The corresponding cell cycle stage is indicated above the graph. Proteins found in both the Whitfield and Meyer papers were classified as APC/C substrates.

**Figure 4. Protein synthesis does not impact mitotic progression nor account for the differences in the apparent rate of proteolysis during mitotic exit.**

(A) Live cell imaging of endogenously CRISPR tagged CCNB1, following addition of either DMSO or 100 µg/ml cycloheximide (CHX). (B) Fluorescence intensity plot of all cells within the field of view following drug addition (DMSO n=24, CHX n=21). Times shown in (A-B) are relative to the point of drug addition. (C) Statistical analysis of the time cells from (A) spent in mitosis using a Mann-Whitney test, \* denotes the calculated p-value (DMSO n=24, CHX n=7). Images shown are sum intensity projections, quantification was carried out on sum intensity projections. (D) Mitotically arrested HeLa cells were washed out from nocodazole and treated with either DMSO or 100 µg/ml CHX for 25 min prior to CDK inhibition with flavopiridol. Samples were harvested as indicated and analysed by Western blot. (E-F) Densitometric quantification of protein level, from Western blot data (D), for indicated protein (Mean ±SEM, n=2).

**Figure 5. CDK inhibition in the absence of APC/C or proteasome activity triggers mitotic exit.**

HeLa cells were arrested in mitosis as previously described. (A) Schematic detailing the APC/C and proteolytic activities in each condition. (B) Western blot showing the protein levels and phosphorylation state in mitotically arrested HeLa cells, following CDK1 inhibition, in the presence or absence of APC/C inhibitors (APC/Ci), 400  $\mu$ M apcin or 25  $\mu$ M pro-TAME, or APC/C and proteasome inhibitors (Prot-i), 40  $\mu$ M MG-132. Densitometric quantification of the levels of (C) CCNB1, (D) AurA, (E) CDC20 and (F) PRC1-pT481 (n=1).

**Figure 6. APC/C-dependent proteolysis is not necessary for ordered dephosphorylation during mitotic exit.**

HeLa cells were arrested in mitosis and mitotic exit triggered as previously. (A) Heatmap of phospho-sites clustered based on their behaviour over time, following CDK inhibition, in the presence of either DMSO or APC/C inhibitors (APC/Ci), 400  $\mu$ M apcin and 25  $\mu$ M pro-TAME (Figure 6-source data 1). (B) Sequence logo analysis showing the relative enrichment of residues in the adjacent cluster when compared against the sequences of all clustered phospho-peptides. Number of phospho-sites and the average half-life of each cluster is indicated. (C) Key linking heatmap colour with observed ratio. (D-F) Densitometric quantification of Western blot samples (Figure 6-figure supplement 1), corresponding to those used for mass spectrometric analysis, is shown for (D) CCNB1, (E) PPP1CA-pT320 and (F) PRC1-pT481 (n=1).



### **Figure 7. Depletion of PP1 increases the half-life of protein phosphorylation during mitotic exit.**

HeLa cell samples depleted of either control or PPP1CA/C were processed for mass spectrometry and analysed as described previously (Bancroft et al., 2020). (A) Clustering heat-map comparing the trends in phosphorylation over time in control and PPP1CA/C depleted cells following CDK1 inhibition (Figure 7-source data 1). Times shown are in minutes. Clusters where the average siPPP1CA/C half-life is >25% more than that of siControl are marked with an orange line to the right of the heatmap. (B) Sequence logo analysis showing the relative enrichment of residues in the correspondingly numbered cluster when compared against the sequences of all clustered phospho-peptides. Number of phospho-sites and the average half-life of each cluster is indicated. (C) Key linking heatmap colour with observed MS ratio.

### **Figure 8. Selective proteolysis of Cyclin B1 initiates ordered dephosphorylation to drive mitotic exit.**

Model highlighting the distinct roles of ubiquitin-mediated proteolysis and phospho-protein phosphatases (PPP) in the regulation of mitotic exit. During metaphase, high levels of CDK1:CCNB1 activity maintains the inhibition of PP1 and PP2A-B55 as well as APC/C<sup>CDC20</sup>. This ensures that mitotic phosphorylations are protected and that cells cannot leave mitosis prematurely, before the proper alignment and attachment of chromosomes. Following checkpoint satisfaction, APC/C<sup>CDC20</sup> can target CCNB1 for degradation leading to CDK1 inactivation and sister chromatid separation. As CDK1 activity falls, inhibition of PP1 and PP2A-B55 is relieved triggering a cascade of dephosphorylations. The rate of dephosphorylation is encoded into the system based on the charge characteristics of each phosphorylation site and their suitability

for interaction with the PPP active site, as determined by amino acid sequence.

These dephosphorylations co-ordinate the many, rapid changes which must occur to create two new daughter cells. Later, in telophase or G1, APC/C<sup>CDC20</sup> and APC/C<sup>CDH1</sup> target the remaining the mitotic factors for degradation to reset the cell for the subsequent G1 phase. The late-APC/C substrates include accessory mitotic kinases, such as Aurora A/B and PLK1, and kinetochore proteins, such as BUBR1 and CENPF.

## REFERENCES

- Agostinis, P., R. Derua, S. Sarno, J. Goris, and W. Merlevede. 1992. Specificity of the polycation-stimulated (type-2A) and ATP,Mg-dependent (type-1) protein phosphatases toward substrates phosphorylated by P34cdc2 kinase. *European journal of biochemistry*. 205:241-248.
- Alfieri, C., L. Chang, Z. Zhang, J. Yang, S. Maslen, M. Skehel, and D. Barford. 2016. Molecular basis of APC/C regulation by the spindle assembly checkpoint. *Nature*. 536:431-436.
- Alfonso-Perez, T., D. Hayward, J. Holder, U. Gruneberg, and F.A. Barr. 2019. MAD1-dependent recruitment of CDK1-CCNB1 to kinetochores promotes spindle checkpoint signaling. *J Cell Biol*. 218:1108-1117.
- Ballabeni, A., M. Melixetian, R. Zamponi, L. Masiero, F. Marinoni, and K. Helin. 2004. Human geminin promotes pre-RC formation and DNA replication by stabilizing CDT1 in mitosis. *The EMBO journal*. 23:3122-3132.
- Bancroft, J., J. Holder, Z. Geraghty, F.A. Barr, and U. Gruneberg. 2020. PP1 promotes cyclin B destruction and the metaphase-anaphase transition by dephosphorylating CDC20. **UNDER REVIEW**
- Berdougo, E., M.V. Nachury, P.K. Jackson, and P.V. Jallepalli. 2008. The nucleolar phosphatase Cdc14B is dispensable for chromosome segregation and mitotic exit in human cells. *Cell cycle*. 7:1184-1190.
- Boersema, P.J., R. Raijmakers, S. Lemeer, S. Mohammed, and A.J. Heck. 2009. Multiplex peptide stable isotope dimethyl labeling for quantitative proteomics. *Nat Protoc*. 4:484-494.
- Bollen, M., W. Peti, M.J. Ragusa, and M. Beullens. 2010. The extended PP1 toolkit: designed to create specificity. *Trends Biochem Sci*. 35:450-458.
- Bouchoux, C., and F. Uhlmann. 2011. A quantitative model for ordered Cdk substrate dephosphorylation during mitotic exit. *Cell*. 147:803-814.
- Burton, J.L., and M.J. Solomon. 2001. D box and KEN box motifs in budding yeast Hsl1p are required for APC-mediated degradation and direct binding to Cdc20p and Cdh1p. *Genes & development*. 15:2381-2395.
- Castilho, P.V., B.C. Williams, S. Mochida, Y. Zhao, and M.L. Goldberg. 2009. The M phase kinase Greatwall (Gwl) promotes inactivation of PP2A/B55delta, a phosphatase directed against CDK phosphosites. *Molecular biology of the cell*. 20:4777-4789.
- Choi, E., H. Choe, J. Min, J.Y. Choi, J. Kim, and H. Lee. 2009. BubR1 acetylation at prometaphase is required for modulating APC/C activity and timing of mitosis. *The EMBO journal*. 28:2077-2089.
- Chunduri, N.K., and Z. Storchova. 2019. The diverse consequences of aneuploidy. *Nat Cell Biol*. 21:54-62.
- Clijsters, L., J. Ogink, and R. Wolthuis. 2013. The spindle checkpoint, APC/C(Cdc20), and APC/C(Cdh1) play distinct roles in connecting mitosis to S phase. *J Cell Biol*. 201:1013-1026.
- Cundell, M.J., R.N. Bastos, T. Zhang, J. Holder, U. Gruneberg, B. Novak, and F.A. Barr. 2013. The BEG (PP2A-B55/ENSA/Greatwall) pathway ensures cytokinesis follows chromosome separation. *Mol Cell*. 52:393-405.

- Cundell, M.J., L.H. Hutter, R. Nunes Bastos, E. Poser, J. Holder, S. Mohammed, B. Novak, and F.A. Barr. 2016. A PP2A-B55 recognition signal controls substrate dephosphorylation kinetics during mitotic exit. *J Cell Biol.* 214:539-554.
- Davey, N.E., and D.O. Morgan. 2016. Building a Regulatory Network with Short Linear Sequence Motifs: Lessons from the Degrons of the Anaphase-Promoting Complex. *Mol Cell.* 64:12-23.
- Di Fiore, B., N.E. Davey, A. Hagting, D. Izawa, J. Mansfeld, T.J. Gibson, and J. Pines. 2015. The ABBA motif binds APC/C activators and is shared by APC/C substrates and regulators. *Developmental cell.* 32:358-372.
- Di Fiore, B., and J. Pines. 2010. How cyclin A destruction escapes the spindle assembly checkpoint. *J Cell Biol.* 190:501-509.
- Dohadwala, M., E.F. da Cruz e Silva, F.L. Hall, R.T. Williams, D.A. Carbonaro-Hall, A.C. Nairn, P. Greengard, and N. Berndt. 1994. Phosphorylation and inactivation of protein phosphatase 1 by cyclin-dependent kinases. *Proc Natl Acad Sci U S A.* 91:6408-6412.
- Fang, G. 2002. Checkpoint protein BubR1 acts synergistically with Mad2 to inhibit anaphase-promoting complex. *Molecular biology of the cell.* 13:755-766.
- Floyd, S., J. Pines, and C. Lindon. 2008. APC/C Cdh1 targets aurora kinase to control reorganization of the mitotic spindle at anaphase. *Current biology : CB.* 18:1649-1658.
- Foe, I.T., S.A. Foster, S.K. Cheung, S.Z. DeLuca, D.O. Morgan, and D.P. Toczyski. 2011. Ubiquitination of Cdc20 by the APC occurs through an intramolecular mechanism. *Current biology : CB.* 21:1870-1877.
- Foster, S.A., and D.O. Morgan. 2012. The APC/C subunit Mnd2/Apc15 promotes Cdc20 autoubiquitination and spindle assembly checkpoint inactivation. *Mol Cell.* 47:921-932.
- Funabiki, H., K. Kumada, and M. Yanagida. 1996. Fission yeast Cut1 and Cut2 are essential for sister chromatid separation, concentrate along the metaphase spindle and form large complexes. *The EMBO journal.* 15:6617-6628.
- Garcia-Higuera, I., E. Manchado, P. Dubus, M. Canamero, J. Mendez, S. Moreno, and M. Malumbres. 2008. Genomic stability and tumour suppression by the APC/C cofactor Cdh1. *Nat Cell Biol.* 10:802-811.
- Gharbi-Ayachi, A., J.C. Labbe, A. Burgess, S. Vigneron, J.M. Strub, E. Brioude, A. Van-Dorsselaer, A. Castro, and T. Lorca. 2010. The substrate of Greatwall kinase, Arpp19, controls mitosis by inhibiting protein phosphatase 2A. *Science.* 330:1673-1677.
- Glotzer, M., A.W. Murray, and M.W. Kirschner. 1991. Cyclin is degraded by the ubiquitin pathway. *Nature.* 349:132-138.
- Gordon, D.J., B. Resio, and D. Pellman. 2012. Causes and consequences of aneuploidy in cancer. *Nat Rev Genet.* 13:189-203.
- Gorr, I.H., D. Boos, and O. Stemmann. 2005. Mutual inhibition of separase and Cdk1 by two-step complex formation. *Mol Cell.* 19:135-141.
- Gurden, M.D., A.J. Holland, W. van Zon, A. Tighe, M.A. Vergnolle, D.A. Andres, H.P. Spielmann, M. Malumbres, R.M. Wolthuis, D.W. Cleveland, and S.S. Taylor. 2010. Cdc20 is required for the post-anaphase, KEN-dependent degradation of centromere protein F. *J Cell Sci.* 123:321-330.

- Hayward, D., T. Alfonso-Perez, M.J. Cundell, M. Hopkins, J. Holder, J. Bancroft, L.H. Hutter, B. Novak, F.A. Barr, and U. Gruneberg. 2019. CDK1-CCNB1 creates a spindle checkpoint-permissive state by enabling MPS1 kinetochore localization. *J Cell Biol.* 218:1182-1199.
- Hein, J.B., E.P.T. Hertz, D.H. Garvanska, T. Kruse, and J. Nilsson. 2017. Distinct kinetics of serine and threonine dephosphorylation are essential for mitosis. *Nat Cell Biol.* 19:1433-1440.
- Hellmuth, S., F. Bottger, C. Pan, M. Mann, and O. Stemmann. 2014. PP2A delays APC/C-dependent degradation of separase-associated but not free securin. *The EMBO journal.* 33:1134-1147.
- Holder, J., E. Poser, and F.A. Barr. 2019. Getting out of mitosis: spatial and temporal control of mitotic exit and cytokinesis by PP1 and PP2A. *FEBS Lett.* 593:2908-2924.
- Huang, X., R. Hatcher, J.P. York, and P. Zhang. 2005. Securin and separase phosphorylation act redundantly to maintain sister chromatid cohesion in mammalian cells. *Molecular biology of the cell.* 16:4725-4732.
- Hutchins, J.R., Y. Toyoda, B. Hegemann, I. Poser, J.K. Heriche, M.M. Sykora, M. Augsburg, O. Hudecz, B.A. Buschhorn, J. Bulkescher, C. Conrad, D. Comartin, A. Schleiffer, M. Sarov, A. Pozniakovsky, M.M. Slabicki, S. Schloissnig, I. Steinmacher, M. Leuschner, A. Ssykor, S. Lawo, L. Pelletier, H. Stark, K. Nasmyth, J. Ellenberg, R. Durbin, F. Buchholz, K. Mechtler, A.A. Hyman, and J.M. Peters. 2010. Systematic analysis of human protein complexes identifies chromosome segregation proteins. *Science.* 328:593-599.
- Imaoka, T., J.A. Lynham, and R.J. Haslam. 1983. Purification and characterization of the 47,000-dalton protein phosphorylated during degranulation of human platelets. *The Journal of biological chemistry.* 258:11404-11414.
- Izawa, D., and J. Pines. 2015. The mitotic checkpoint complex binds a second CDC20 to inhibit active APC/C. *Nature.* 517:631-634.
- Jacobs, H.W., E. Keidel, and C.F. Lehner. 2001. A complex degradation signal in Cyclin A required for G1 arrest, and a C-terminal region for mitosis. *The EMBO journal.* 20:2376-2386.
- Kallio, M., J. Weinstein, J.R. Daum, D.J. Burke, and G.J. Gorbsky. 1998. Mammalian p55CDC mediates association of the spindle checkpoint protein Mad2 with the cyclosome/anaphase-promoting complex, and is involved in regulating anaphase onset and late mitotic events. *J Cell Biol.* 141:1393-1406.
- King, R.W., M. Glotzer, and M.W. Kirschner. 1996. Mutagenic analysis of the destruction signal of mitotic cyclins and structural characterization of ubiquitinated intermediates. *Molecular biology of the cell.* 7:1343-1357.
- King, R.W., J.M. Peters, S. Tugendreich, M. Rolfe, P. Hieter, and M.W. Kirschner. 1995. A 20S complex containing CDC27 and CDC16 catalyzes the mitosis-specific conjugation of ubiquitin to cyclin B. *Cell.* 81:279-288.
- Kotani, S., H. Tanaka, H. Yasuda, and K. Todokoro. 1999. Regulation of APC activity by phosphorylation and regulatory factors. *J Cell Biol.* 146:791-800.
- Kraft, C., F. Herzog, C. Gieffers, K. Mechtler, A. Hagting, J. Pines, and J.M. Peters. 2003. Mitotic regulation of the human anaphase-promoting complex by phosphorylation. *The EMBO journal.* 22:6598-6609.

- Kramer, E.R., C. Gieffers, G. Holzl, M. Hengstschlager, and J.M. Peters. 1998. Activation of the human anaphase-promoting complex by proteins of the CDC20/Fizzy family. *Current biology : CB*. 8:1207-1210.
- Kramer, E.R., N. Scheuringer, A.V. Podtelejnikov, M. Mann, and J.M. Peters. 2000. Mitotic regulation of the APC activator proteins CDC20 and CDH1. *Molecular biology of the cell*. 11:1555-1569.
- Lindon, C., and J. Pines. 2004. Ordered proteolysis in anaphase inactivates Plk1 to contribute to proper mitotic exit in human cells. *J Cell Biol*. 164:233-241.
- Lowe, M., and F.A. Barr. 2007. Inheritance and biogenesis of organelles in the secretory pathway. *Nat Rev Mol Cell Biol*. 8:429-439.
- Lu, D., J.Y. Hsiao, N.E. Davey, V.A. Van Voorhis, S.A. Foster, C. Tang, and D.O. Morgan. 2014. Multiple mechanisms determine the order of APC/C substrate degradation in mitosis. *J Cell Biol*. 207:23-39.
- Mansfeld, J., P. Collin, M.O. Collins, J.S. Choudhary, and J. Pines. 2011. APC15 drives the turnover of MCC-CDC20 to make the spindle assembly checkpoint responsive to kinetochore attachment. *Nat Cell Biol*. 13:1234-1243.
- McCloy, R.A., B.L. Parker, S. Rogers, R. Chaudhuri, V. Gayevskiy, N.J. Hoffman, N. Ali, D.N. Watkins, R.J. Daly, D.E. James, T. Lorca, A. Castro, and A. Burgess. 2015. Global Phosphoproteomic Mapping of Early Mitotic Exit in Human Cells Identifies Novel Substrate Dephosphorylation Motifs. *Mol Cell Proteomics*. 14:2194-2212.
- Meyer, H.J., and M. Rape. 2011. Processive ubiquitin chain formation by the anaphase-promoting complex. *Seminars in cell & developmental biology*. 22:544-550.
- Mocciaro, A., E. Berdugo, K. Zeng, E. Black, P. Vagnarelli, W. Earnshaw, D. Gillespie, P. Jallepalli, and E. Schiebel. 2010. Vertebrate cells genetically deficient for Cdc14A or Cdc14B retain DNA damage checkpoint proficiency but are impaired in DNA repair. *J Cell Biol*. 189:631-639.
- Mochida, S., S. Ikeo, J. Gannon, and T. Hunt. 2009. Regulated activity of PP2A-B55 delta is crucial for controlling entry into and exit from mitosis in Xenopus egg extracts. *The EMBO journal*. 28:2777-2785.
- Mochida, S., S.L. Maslen, M. Skehel, and T. Hunt. 2010. Greatwall phosphorylates an inhibitor of protein phosphatase 2A that is essential for mitosis. *Science*. 330:1670-1673.
- Mumby, M.C., K.L. Russell, L.J. Garrard, and D.D. Green. 1987. Cardiac contractile protein phosphatases. Purification of two enzyme forms and their characterization with subunit-specific antibodies. *The Journal of biological chemistry*. 262:6257-6265.
- Neef, R., U. Gruneberg, R. Kopajtich, X. Li, E.A. Nigg, H. Sillje, and F.A. Barr. 2007. Choice of Plk1 docking partners during mitosis and cytokinesis is controlled by the activation state of Cdk1. *Nat Cell Biol*. 9:436-444.
- Neef, R., U.R. Klein, R. Kopajtich, and F.A. Barr. 2006. Cooperation between mitotic kinesins controls the late stages of cytokinesis. *Current biology : CB*. 16:301-307.
- Nilsson, J. 2019. Protein phosphatases in the regulation of mitosis. *J Cell Biol*. 218:395-409.

- Nilsson, J., M. Yekezare, J. Minshull, and J. Pines. 2008. The APC/C maintains the spindle assembly checkpoint by targeting Cdc20 for destruction. *Nat Cell Biol.* 10:1411-1420.
- Passmore, L.A., E.A. McCormack, S.W. Au, A. Paul, K.R. Willison, J.W. Harper, and D. Barford. 2003. Doc1 mediates the activity of the anaphase-promoting complex by contributing to substrate recognition. *The EMBO journal.* 22:786-796.
- Pfleger, C.M., and M.W. Kirschner. 2000. The KEN box: an APC recognition signal distinct from the D box targeted by Cdh1. *Genes & development.* 14:655-665.
- Polymenis, M., and R. Aramayo. 2015. Translate to divide: control of the cell cycle by protein synthesis. *Microb Cell.* 2:94-104.
- Presler, M., E. Van Itallie, A.M. Klein, R. Kunz, M.L. Coughlin, L. Peshkin, S.P. Gygi, M. Wühr, and M.W. Kirschner. 2017. Proteomics of phosphorylation and protein dynamics during fertilization and meiotic exit in the *Xenopus* egg. *Proc Natl Acad Sci U S A.* 114:E10838-E10847.
- Reddy, S.K., M. Rape, W.A. Margansky, and M.W. Kirschner. 2007. Ubiquitination by the anaphase-promoting complex drives spindle checkpoint inactivation. *Nature.* 446:921-925.
- Rodrigues, N.T., S. Lekomtsev, S. Jananji, J. Kriston-Vizi, G.R. Hickson, and B. Baum. 2015. Kinetochore-localized PP1-Sds22 couples chromosome segregation to polar relaxation. *Nature.* 524:489-492.
- Rogers, S., D. Fey, R.A. McCloy, B.L. Parker, N.J. Mitchell, R.J. Payne, R.J. Daly, D.E. James, C.E. Caldon, D.N. Watkins, D.R. Croucher, and A. Burgess. 2016. PP1 initiates the dephosphorylation of MASTL, triggering mitotic exit and bistability in human cells. *J Cell Sci.* 129:1340-1354.
- Sackton, K.L., N. Dimova, X. Zeng, W. Tian, M. Zhang, T.B. Sackton, J. Meaders, K.L. Pfaff, F. Sigoillot, H. Yu, X. Luo, and R.W. King. 2014. Synergistic blockade of mitotic exit by two chemical inhibitors of the APC/C. *Nature.* 514:646-649.
- Schmitz, M.H., M. Held, V. Janssens, J.R. Hutchins, O. Hudecz, E. Ivanova, J. Goris, L. Trinkle-Mulcahy, A.I. Lamond, I. Poser, A.A. Hyman, K. Mechtler, J.M. Peters, and D.W. Gerlich. 2010. Live-cell imaging RNAi screen identifies PP2A-B55alpha and importin-beta1 as key mitotic exit regulators in human cells. *Nat Cell Biol.* 12:886-893.
- Seki, A., and G. Fang. 2007. CKAP2 is a spindle-associated protein degraded by APC/C-Cdh1 during mitotic exit. *The Journal of biological chemistry.* 282:15103-15113.
- Sivakumar, S., and G.J. Gorbsky. 2015. Spatiotemporal regulation of the anaphase-promoting complex in mitosis. *Nat Rev Mol Cell Biol.* 16:82-94.
- Stegmeier, F., and A. Amon. 2004. Closing mitosis: the functions of the Cdc14 phosphatase and its regulation. *Annual review of genetics.* 38:203-232.
- Stemmann, O., I.H. Gorr, and D. Boos. 2006. Anaphase topsy-turvy: Cdk1 a securin, separase a CKI. *Cell cycle.* 5:11-13.
- Stewart, S., and G. Fang. 2005. Destruction box-dependent degradation of aurora B is mediated by the anaphase-promoting complex/cyclosome and Cdh1. *Cancer research.* 65:8730-8735.

- Sudakin, V., D. Ganoth, A. Dahan, H. Heller, J. Hershko, F.C. Luca, J.V. Ruderman, and A. Hershko. 1995. The cyclosome, a large complex containing cyclin-selective ubiquitin ligase activity, targets cyclins for destruction at the end of mitosis. *Molecular biology of the cell*. 6:185-197.
- Takaki, T., M. Montagner, M.P. Serres, M. Le Berre, M. Russell, L. Collinson, K. Szuhai, M. Howell, S.J. Boulton, E. Sahai, and M. Petronczki. 2017. Actomyosin drives cancer cell nuclear dysmorphia and threatens genome stability. *Nature communications*. 8:16013.
- Taylor, S., and J.M. Peters. 2008. Polo and Aurora kinases: lessons derived from chemical biology. *Current opinion in cell biology*. 20:77-84.
- Tipton, A.R., K. Wang, L. Link, J.J. Bellizzi, H. Huang, T. Yen, and S.T. Liu. 2011. BUBR1 and closed MAD2 (C-MAD2) interact directly to assemble a functional mitotic checkpoint complex. *The Journal of biological chemistry*. 286:21173-21179.
- Touati, S.A., and F. Uhlmann. 2018. A global view of substrate phosphorylation and dephosphorylation during budding yeast mitotic exit. *Microb Cell*. 5:389-392.
- Trinkle-Mulcahy, L., J. Andersen, Y.W. Lam, G. Moorhead, M. Mann, and A.I. Lamond. 2006. Repo-Man recruits PP1 gamma to chromatin and is essential for cell viability. *J Cell Biol*. 172:679-692.
- Tyanova, S., T. Temu, and J. Cox. 2016a. The MaxQuant computational platform for mass spectrometry-based shotgun proteomics. *Nat Protoc*. 11:2301-2319.
- Tyanova, S., T. Temu, P. Sinitcyn, A. Carlson, M.Y. Hein, T. Geiger, M. Mann, and J. Cox. 2016b. The Perseus computational platform for comprehensive analysis of (prote)omics data. *Nat Methods*. 13:731-740.
- Uzunova, K., B.T. Dye, H. Schutz, R. Ladurner, G. Petzold, Y. Toyoda, M.A. Jarvis, N.G. Brown, I. Poser, M. Novatchkova, K. Mechtler, A.A. Hyman, H. Stark, B.A. Schulman, and J.M. Peters. 2012. APC15 mediates CDC20 autoubiquitylation by APC/C(MCC) and disassembly of the mitotic checkpoint complex. *Nat Struct Mol Biol*. 19:1116-1123.
- Vagnarelli, P., S. Ribeiro, L. Sennels, L. Sanchez-Pulido, F. de Lima Alves, T. Verheyen, D.A. Kelly, C.P. Ponting, J. Rappsilber, and W.C. Earnshaw. 2011. Repo-Man coordinates chromosomal reorganization with nuclear envelope reassembly during mitotic exit. *Developmental cell*. 21:328-342.
- Varetti, G., C. Guida, S. Santaguida, E. Chirolì, and A. Musacchio. 2011. Homeostatic control of mitotic arrest. *Mol Cell*. 44:710-720.
- Visintin, R., S. Prinz, and A. Amon. 1997. CDC20 and CDH1: a family of substrate-specific activators of APC-dependent proteolysis. *Science*. 278:460-463.
- Wang, R., J.L. Burton, and M.J. Solomon. 2017. Transcriptional and post-transcriptional regulation of Cdc20 during the spindle assembly checkpoint in *S. cerevisiae*. *Cell Signal*. 33:41-48.
- Watson, E.R., N.G. Brown, J.M. Peters, H. Stark, and B.A. Schulman. 2019. Posing the APC/C E3 Ubiquitin Ligase to Orchestrate Cell Division. *Trends Cell Biol*. 29:117-134.
- Whitfield, M.L., G. Sherlock, A.J. Saldanha, J.I. Murray, C.A. Ball, K.E. Alexander, J.C. Matese, C.M. Perou, M.M. Hurt, P.O. Brown, and D. Botstein. 2002. Identification of genes periodically expressed in the human cell cycle and their expression in tumors. *Molecular biology of the cell*. 13:1977-2000.



- Williams, B.C., J.J. Filter, K.A. Blake-Hodek, B.E. Wadzinski, N.J. Fuda, D. Shalloway, and M.L. Goldberg. 2014. Greatwall-phosphorylated Endosulfine is both an inhibitor and a substrate of PP2A-B55 heterotrimers. *Elife*. 3:e01695.
- Wu, J.Q., J.Y. Guo, W. Tang, C.S. Yang, C.D. Freel, C. Chen, A.C. Nairn, and S. Kornbluth. 2009. PP1-mediated dephosphorylation of phosphoproteins at mitotic exit is controlled by inhibitor-1 and PP1 phosphorylation. *Nat Cell Biol*. 11:644-651.
- Xing, Y., Y. Xu, Y. Chen, P.D. Jeffrey, Y. Chao, Z. Lin, Z. Li, S. Strack, J.B. Stock, and Y. Shi. 2006. Structure of protein phosphatase 2A core enzyme bound to tumor-inducing toxins. *Cell*. 127:341-353.
- Xu, Y., Y. Xing, Y. Chen, Y. Chao, Z. Lin, E. Fan, J.W. Yu, S. Strack, P.D. Jeffrey, and Y. Shi. 2006. Structure of the protein phosphatase 2A holoenzyme. *Cell*. 127:1239-1251.
- Yamaguchi, M., R. VanderLinden, F. Weissmann, R. Qiao, P. Dube, N.G. Brown, D. Haselbach, W. Zhang, S.S. Sidhu, J.M. Peters, H. Stark, and B.A. Schulman. 2016. Cryo-EM of Mitotic Checkpoint Complex-Bound APC/C Reveals Reciprocal and Conformational Regulation of Ubiquitin Ligation. *Mol Cell*. 63:593-607.
- Yamano, H., K. Ishii, and M. Yanagida. 1994. Phosphorylation of dis2 protein phosphatase at the C-terminal cdc2 consensus and its potential role in cell cycle regulation. *The EMBO journal*. 13:5310-5318.
- Zachariae, W., T.H. Shin, M. Galova, B. Obermaier, and K. Nasmyth. 1996. Identification of subunits of the anaphase-promoting complex of *Saccharomyces cerevisiae*. *Science*. 274:1201-1204.
- Zeng, K., R.N. Bastos, F.A. Barr, and U. Gruneberg. 2010. Protein phosphatase 6 regulates mitotic spindle formation by controlling the T-loop phosphorylation state of Aurora A bound to its activator TPX2. *J Cell Biol*. 191:1315-1332.
- Zhang, S., L. Chang, C. Alfieri, Z. Zhang, J. Yang, S. Maslen, M. Skehel, and D. Barford. 2016. Molecular mechanism of APC/C activation by mitotic phosphorylation. *Nature*. 533:260-264.
- Zhao, W.M., and G. Fang. 2005. Anillin is a substrate of anaphase-promoting complex/cyclosome (APC/C) that controls spatial contractility of myosin during late cytokinesis. *The Journal of biological chemistry*. 280:33516-33524.

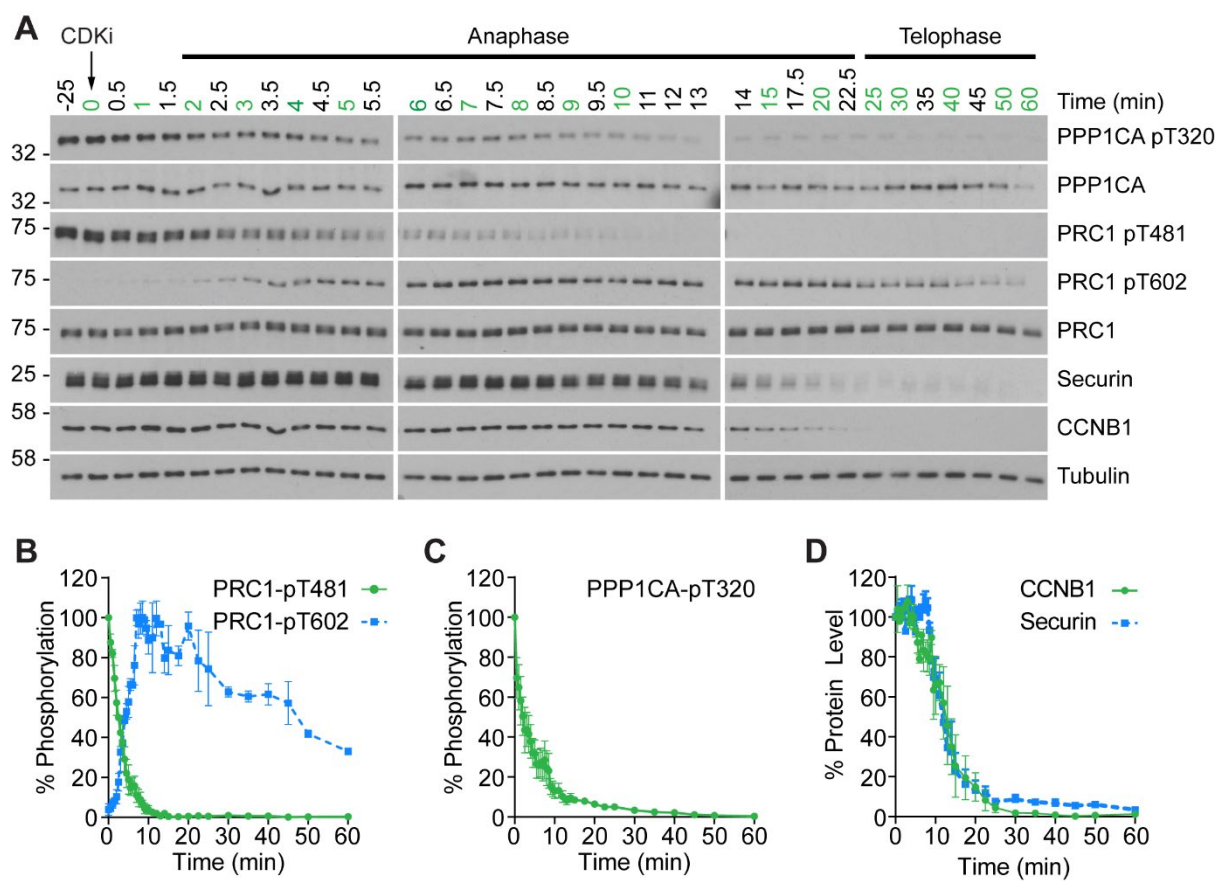

**Figure 1. CDK inhibition promotes orderly mitotic exit.**

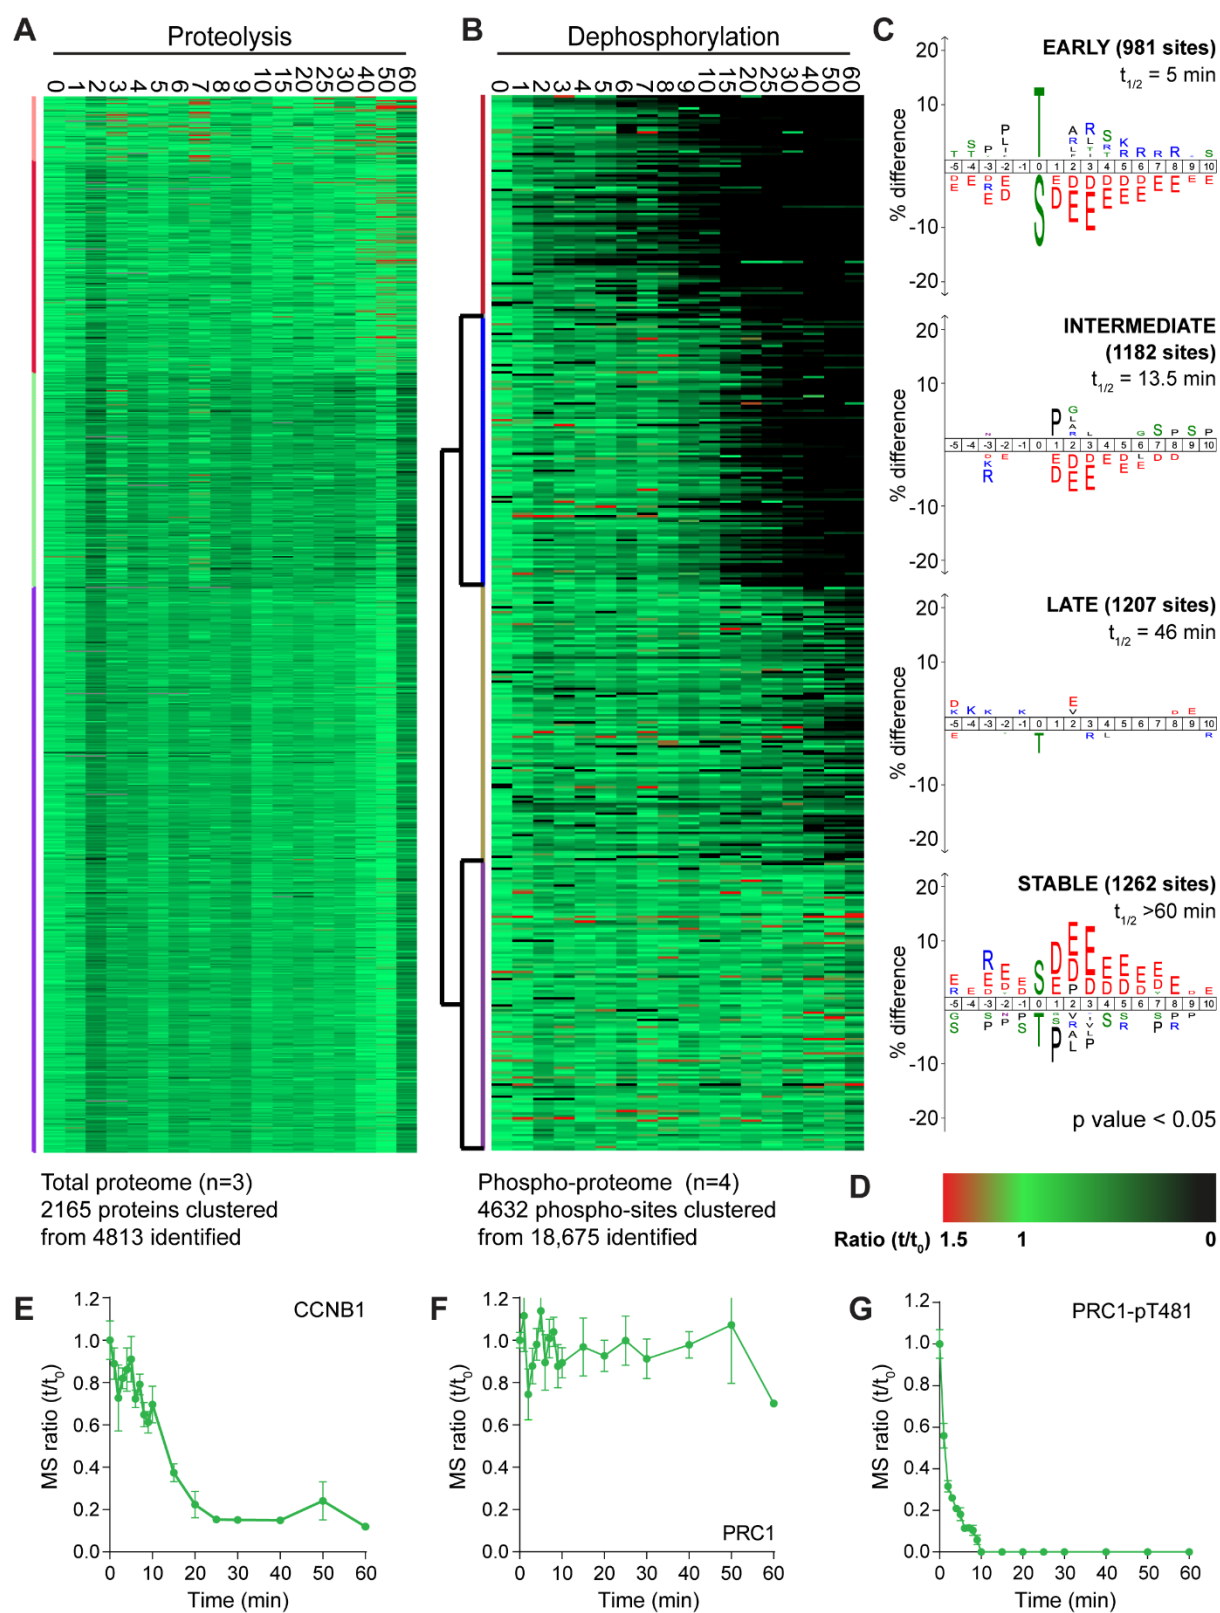

**Figure 2. An ordered cascade of dephosphorylation during mitotic exit.**

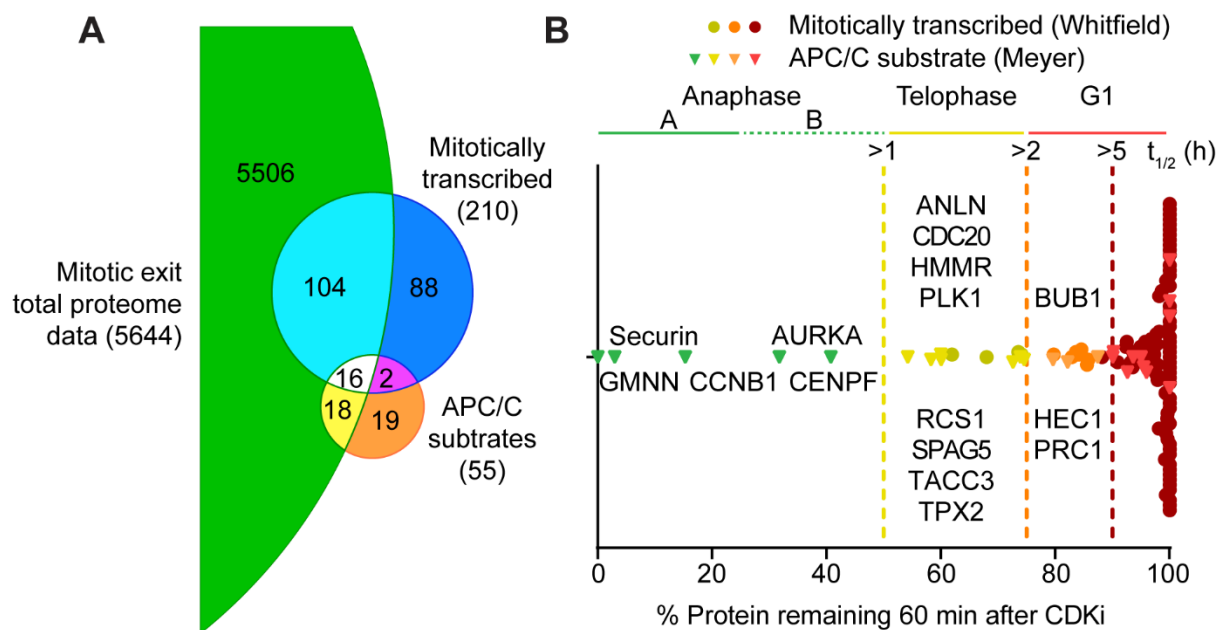

**Figure 3. Selective proteolysis of cyclin B, geminin and securin in anaphase A.**

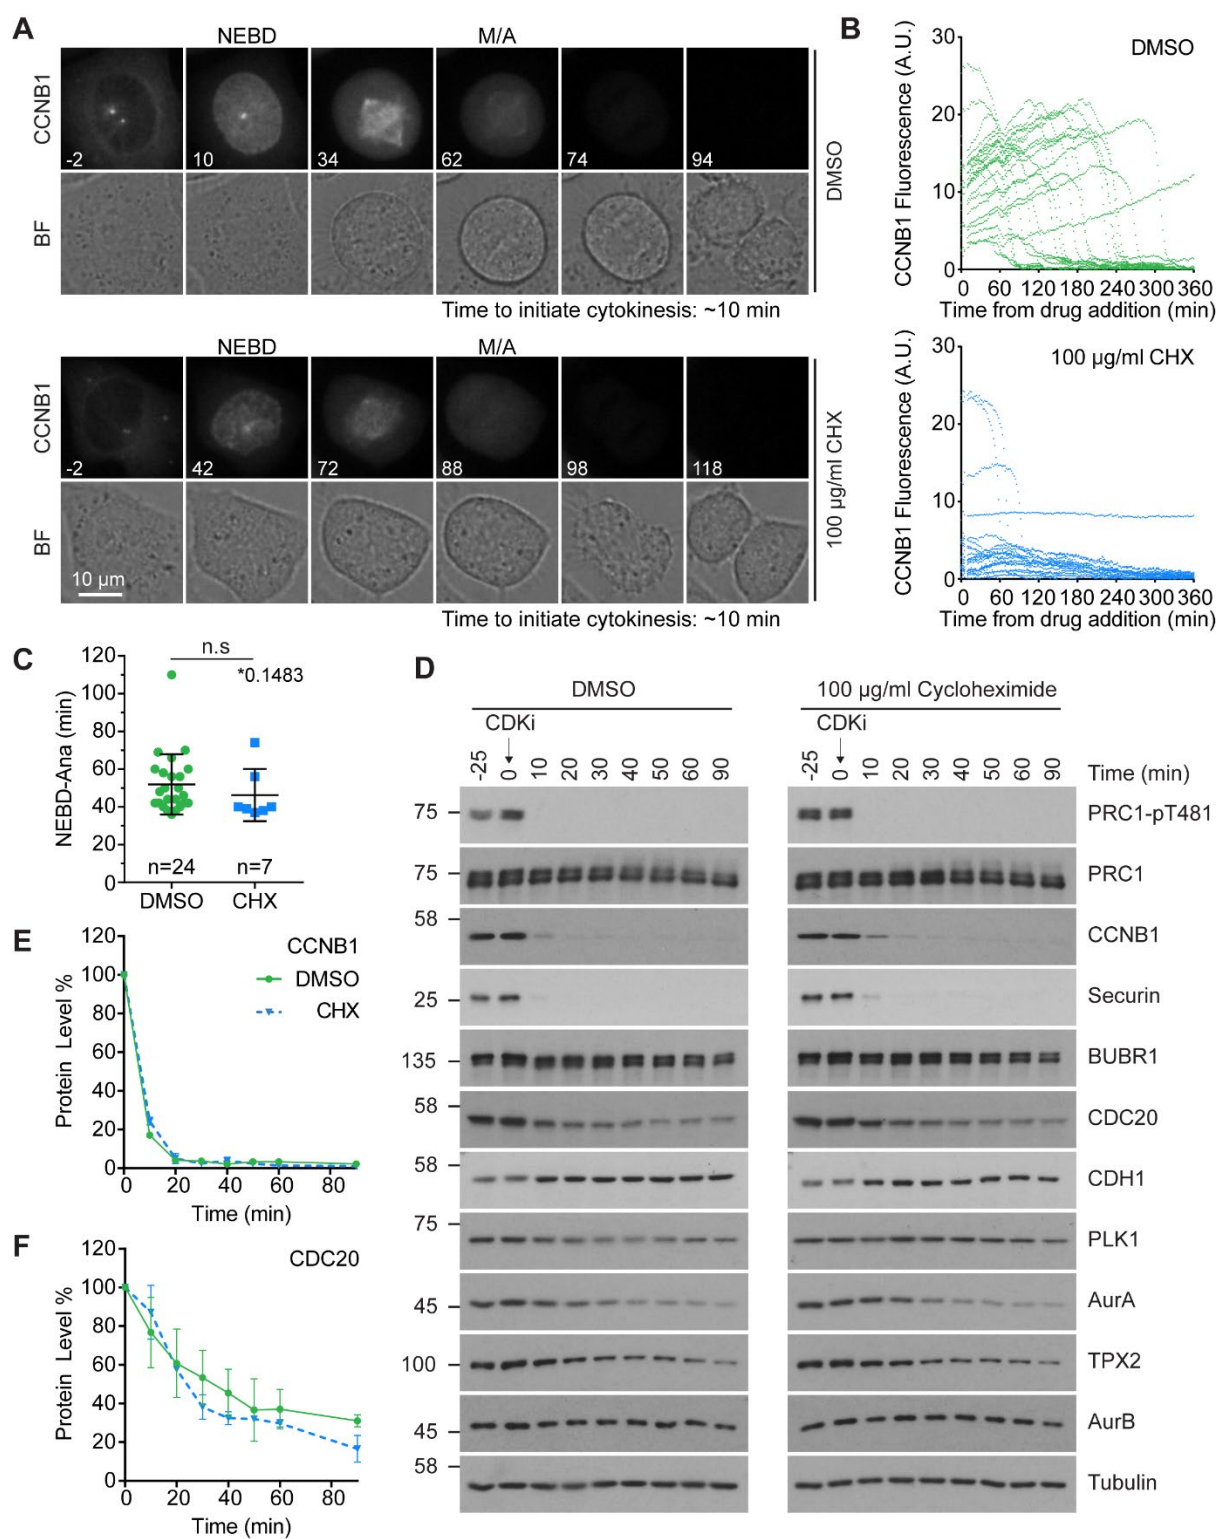

**Figure 4. Protein synthesis does not impact mitotic progression nor account for the differences in the apparent rate of proteolysis during mitotic exit.**

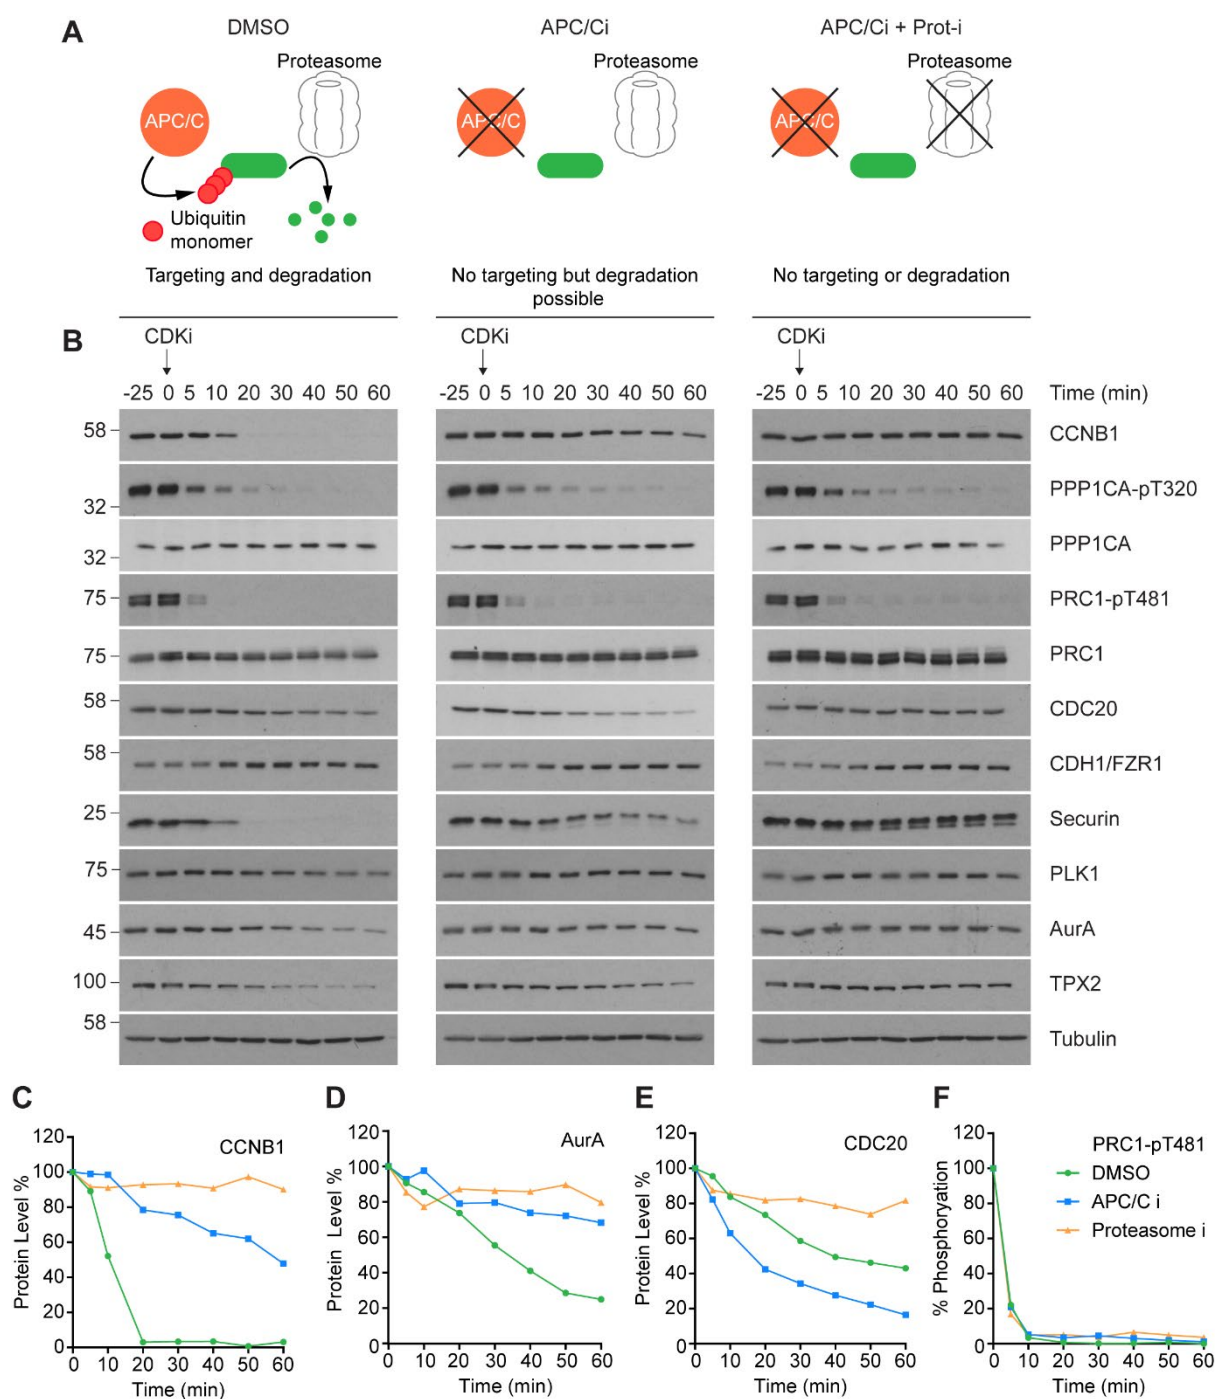

**Figure 5. CDK inhibition in the absence of APC/C or proteasome activity triggers mitotic exit.**

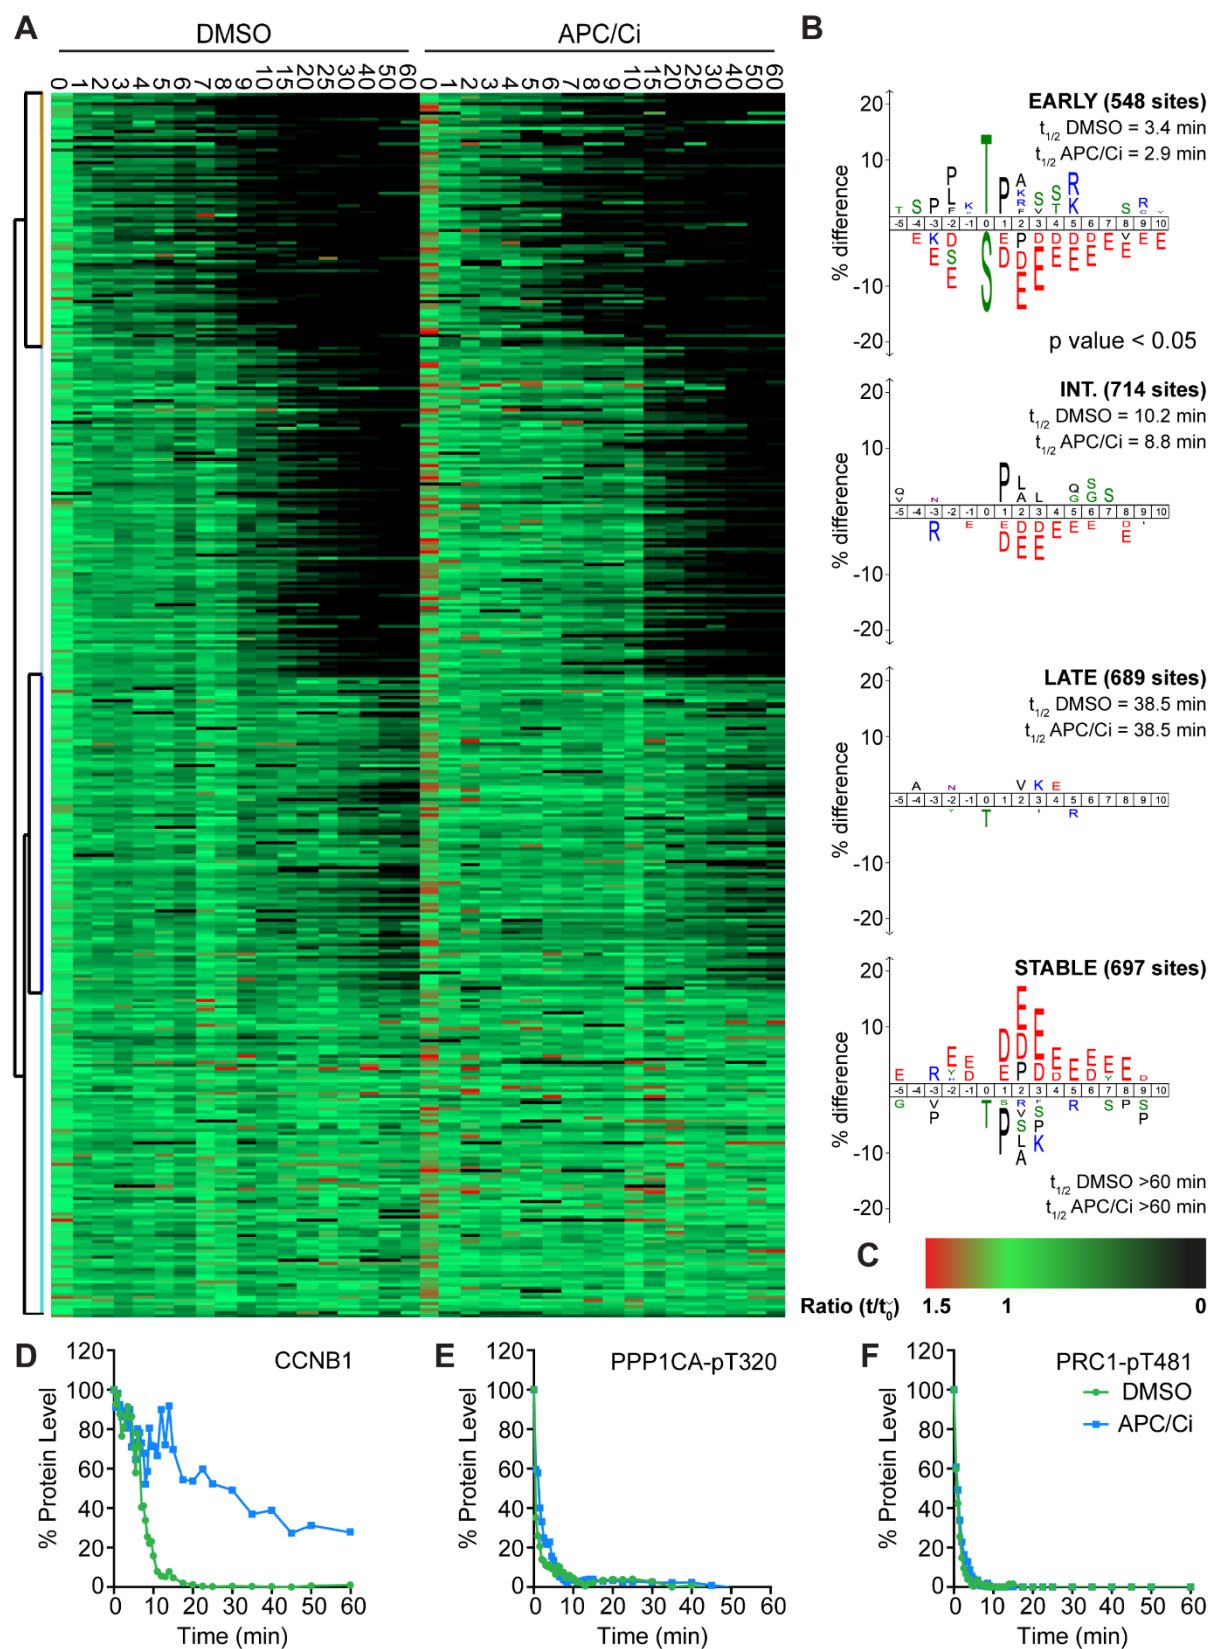

**Figure 6. APC/C-dependent proteolysis is not necessary for ordered dephosphorylation during mitotic exit.**

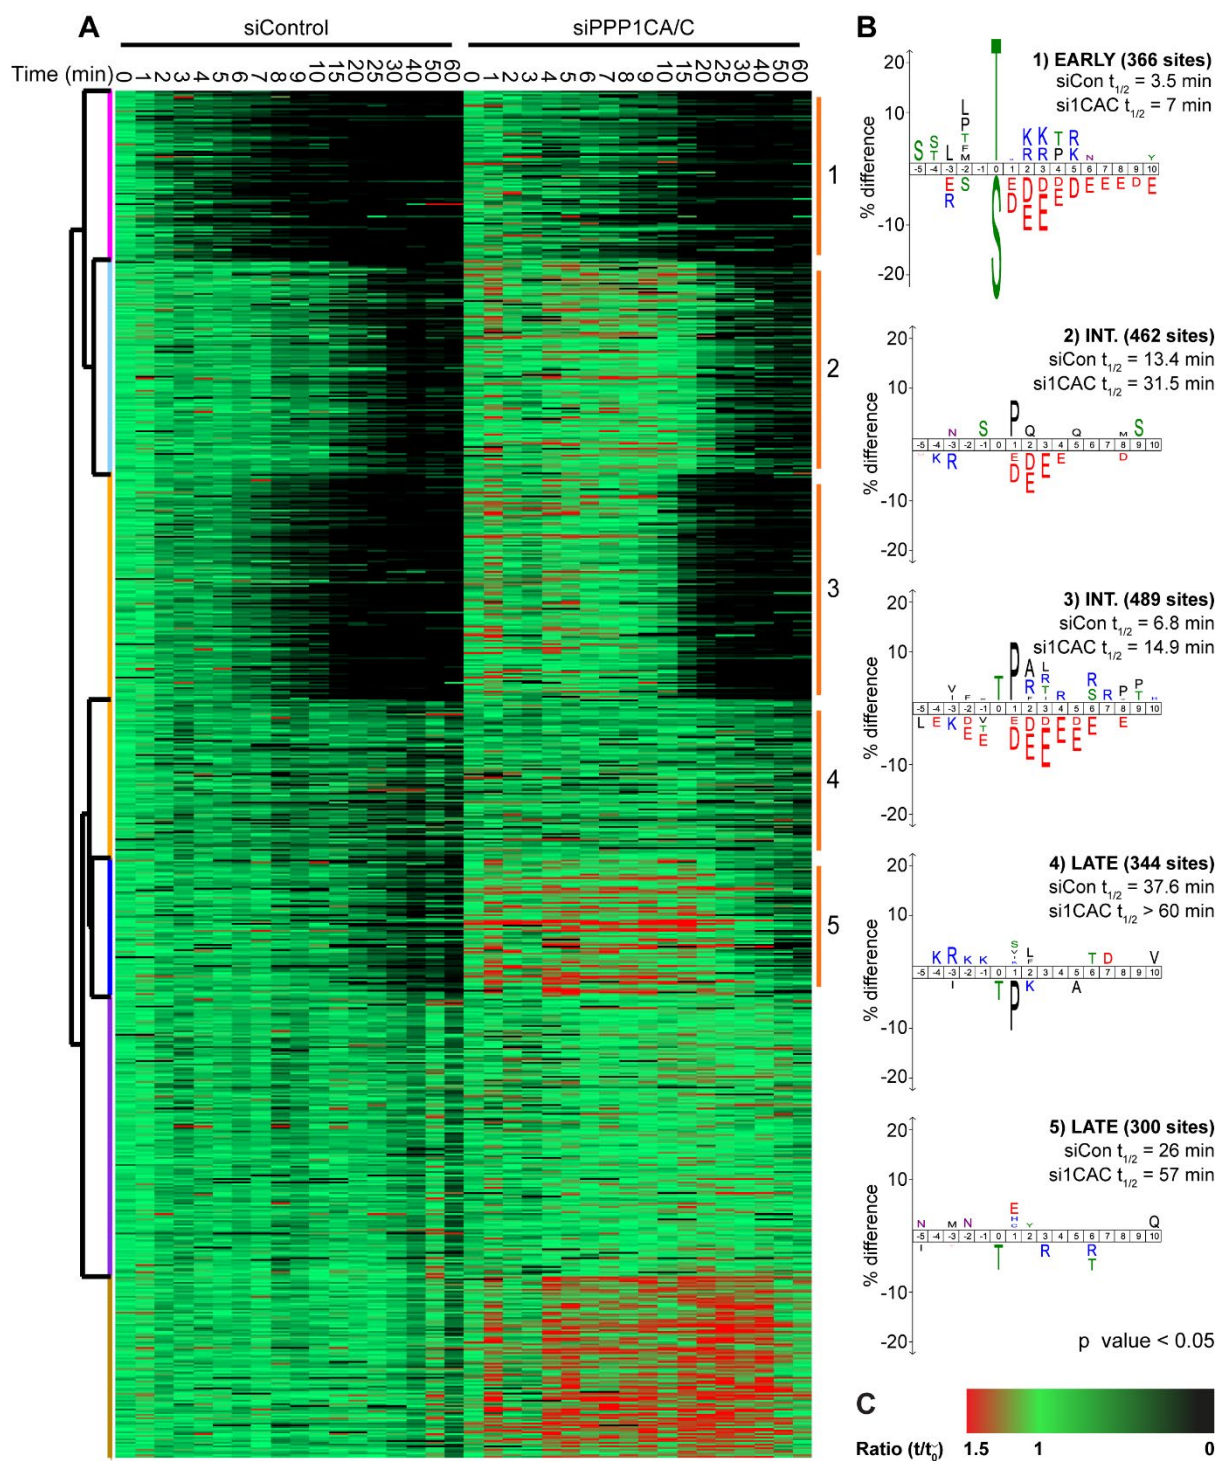

Figure 7. Depletion of PP1 increases the half-life of protein phosphorylation during mitotic exit (cont.).



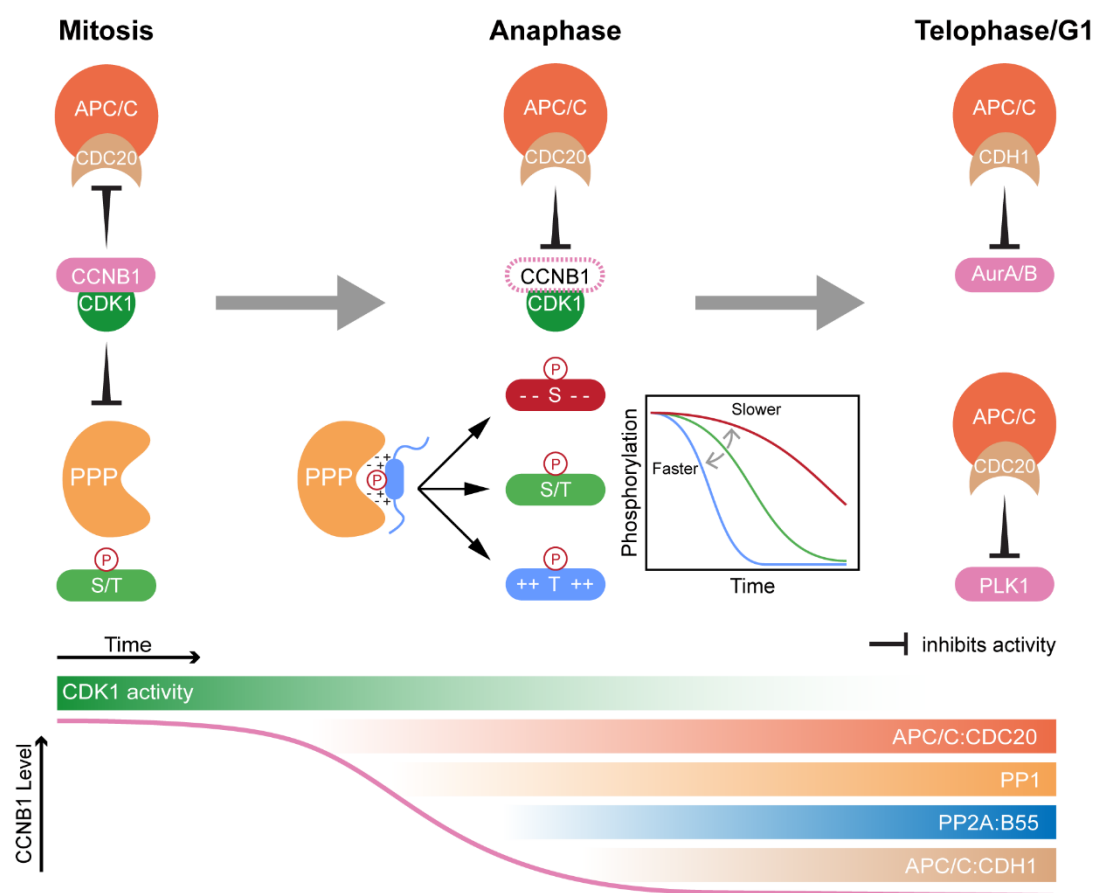

**Figure 8. Selective proteolysis of Cyclin B1 initiates ordered dephosphorylation to drive mitotic exit.**
