# Supplementary material for: Ordered dephosphorylation initiated by the selective proteolysis of cyclin B drives mitotic exit
Source: bioRxiv preprint, doi:10.1101/2020.06.12.148742, version 1 (2020-06-13)
Supplement: Figure 2_Source Data 1_CDKi Total proteome data [file 148742_file03.xlsx]

## Sheet: CDKi Total Proteome MS data
Ratio H/L 00_01	Ratio H/L 00_02	Ratio H/L 00_03	Ratio H/L 01_01	Ratio H/L 01_02	Ratio H/L 01_03	Ratio H/L 02_01	Ratio H/L 02_02	Ratio H/L 02_03	Ratio H/L 03_01	Ratio H/L 03_02	Ratio H/L 03_03	Ratio H/L 04_01	Ratio H/L 04_02	Ratio H/L 04_03	Ratio H/L 05_01	Ratio H/L 05_02	Ratio H/L 05_03	Ratio H/L 06_01	Ratio H/L 06_02	Ratio H/L 06_03	Ratio H/L 07_01	Ratio H/L 07_02	Ratio H/L 07_03	Ratio H/L 08_01	Ratio H/L 08_02	Ratio H/L 08_03	Ratio H/L 09_01	Ratio H/L 09_02	Ratio H/L 09_03	Ratio H/L 10_01	Ratio H/L 10_02	Ratio H/L 10_03	Ratio H/L 15_01	Ratio H/L 15_02	Ratio H/L 15_03	Ratio H/L 20_01	Ratio H/L 20_02	Ratio H/L 20_03	Ratio H/L 25_01	Ratio H/L 25_02	Ratio H/L 25_03	Ratio H/L 30_01	Ratio H/L 30_02	Ratio H/L 30_03	Ratio H/L 40_02	Ratio H/L 40_03	Ratio H/L 50_02	Ratio H/L 50_03	Ratio H/L 60_02
NaN	NaN	NaN	NaN	NaN	NaN	NaN	NaN	NaN	NaN	NaN	NaN	NaN	NaN	NaN	NaN	NaN	NaN	NaN	NaN	NaN	NaN	NaN	NaN	NaN	NaN	NaN	NaN	NaN	NaN	NaN	NaN	NaN	NaN	NaN	NaN	NaN	NaN	NaN	NaN	NaN	NaN	NaN	NaN	NaN	NaN	NaN	NaN	NaN	NaN
0.95446	0.78782	1.0423	0.69488	0.7604	0.95317	0.53361	0.6742	0.85798	0.77085	0.57328	0.92971	0.68078	0.67482	0.89922	0.85095	0.62747	0.97614	0.68481	0.60984	0.80679	0.55841	0.69005	0.94374	0.78074	0.70167	0.84154	0.75578	0.64696	0.88885	0.80835	0.75552	0.93448	0.73511	0.77471	0.84996	0.69751	0.80073	0.94498	0.74485	0.61623	0.99184	0.74069	0.71163	1.0317	1.1121	0.65773	0.67464	1.2135	0.72723
0.84398	0.77103	0.94125	0.56863	0.70626	0.9764	0.4022	0.62651	0.98504	0.66095	0.65883	0.82394	0.58823	0.60609	0.92729	0.68279	0.71741	1.0862	0.76459	0.52117	0.71185	0.61587	0.56643	1.0695	0.75098	0.75006	1.0313	0.77083	0.64745	0.99282	0.6986	0.54281	1.0277	0.6287	0.49069	1.0197	0.60766	0.59389	1.1335	0.86373	0.39368	1.1278	0.75699	0.64685	1.1593	1.0865	0.69646	0.57597	1.3231	0.54415
0.91974	0.68372	1.1243	0.53611	0.76241	1.1289	0.41741	0.70157	0.97638	0.65506	0.70326	0.63224	0.61996	0.69561	1.003	0.82486	0.58767	0.97799	0.74199	0.60982	0.81725	0.63569	0.74531	0.9497	0.82862	0.67515	0.71667	0.77843	0.58242	0.88165	0.76532	0.84318	0.91811	0.81935	0.62282	0.99016	0.70174	0.89981	0.9177	0.83032	0.6459	0.94785	0.83132	0.70641	1.0062	1.0313	0.66379	0.66563	1.4145	0.81932
NaN	NaN	NaN	NaN	NaN	NaN	NaN	NaN	NaN	NaN	NaN	NaN	NaN	NaN	NaN	NaN	NaN	NaN	NaN	NaN	NaN	NaN	NaN	NaN	NaN	NaN	NaN	NaN	NaN	NaN	NaN	NaN	NaN	NaN	NaN	NaN	NaN	NaN	NaN	NaN	NaN	NaN	NaN	NaN	NaN	NaN	NaN	NaN	NaN	NaN
0.90845	0.75417	0.95286	0.62506	0.75018	1.0389	0.38634	0.67806	0.91892	0.69267	0.63257	0.73346	0.62994	0.61977	0.90052	0.81256	0.66556	0.95729	0.70409	0.65188	0.86377	0.59194	0.6735	0.90365	0.76864	0.84122	0.78573	0.72151	0.58402	0.85235	0.72407	0.78188	0.98184	0.77719	0.75688	0.97673	0.6263	0.68554	0.87762	0.76325	0.6353	0.90338	0.72542	0.81486	0.90764	1.0907	0.75385	0.68239	1.2712	0.71714
1.1262	0.81506	0.98098	0.81383	0.70573	1.11	0.35658	0.56017	1.1817	0.77423	NaN	0.85321	0.76588	0.55311	0.88343	0.93202	0.56477	1.0901	0.79093	0.49222	0.87142	0.50449	0.5686	NaN	0.78852	0.58365	NaN	0.74486	NaN	0.89764	0.88241	0.69782	NaN	0.75168	0.5141	NaN	0.50297	0.54916	NaN	0.80956	0.5995	1.1951	0.82245	0.49421	1.5629	1.0194	NaN	0.56849	1.2384	0.55733
NaN	0.72024	NaN	NaN	NaN	NaN	NaN	0.29485	NaN	NaN	NaN	NaN	NaN	NaN	NaN	NaN	NaN	NaN	NaN	NaN	NaN	NaN	0.62469	NaN	NaN	NaN	NaN	NaN	NaN	NaN	NaN	1.023	NaN	NaN	NaN	NaN	0.75525	NaN	NaN	1.0408	NaN	NaN	NaN	0.29635	NaN	NaN	NaN	0.38019	NaN	NaN
0.7445	0.69221	NaN	NaN	NaN	NaN	0.40197	NaN	NaN	NaN	NaN	NaN	NaN	NaN	NaN	NaN	NaN	NaN	0.91817	0.89218	NaN	NaN	NaN	NaN	NaN	NaN	NaN	NaN	NaN	NaN	NaN	1.1136	NaN	NaN	NaN	NaN	NaN	0.99137	NaN	NaN	NaN	NaN	NaN	1.4957	NaN	NaN	NaN	NaN	NaN	NaN
0.77062	NaN	1.2089	0.68486	NaN	1.3326	0.46449	NaN	NaN	0.70687	0.54119	1.3365	0.67744	NaN	0.7297	0.97734	0.54279	NaN	0.60538	0.55581	0.9207	0.74947	0.71541	NaN	0.76163	0.8656	NaN	0.67957	NaN	0.75571	0.91517	0.73068	NaN	0.71942	0.55697	NaN	NaN	0.65998	NaN	0.77721	0.81432	NaN	0.42508	0.85527	NaN	0.9621	NaN	0.86381	NaN	1.0973
NaN	NaN	NaN	NaN	NaN	NaN	NaN	NaN	NaN	NaN	NaN	NaN	NaN	NaN	NaN	NaN	NaN	NaN	NaN	NaN	NaN	NaN	NaN	NaN	NaN	NaN	NaN	NaN	NaN	NaN	NaN	NaN	NaN	NaN	NaN	NaN	NaN	NaN	NaN	NaN	NaN	NaN	NaN	NaN	NaN	NaN	NaN	NaN	NaN	NaN
NaN	NaN	NaN	NaN	NaN	NaN	NaN	NaN	NaN	NaN	NaN	NaN	NaN	NaN	NaN	NaN	NaN	NaN	NaN	NaN	NaN	0.64728	NaN	NaN	NaN	NaN	NaN	NaN	NaN	NaN	NaN	NaN	NaN	NaN	NaN	NaN	NaN	NaN	NaN	NaN	NaN	NaN	NaN	NaN	NaN	NaN	NaN	NaN	NaN	NaN
NaN	NaN	NaN	NaN	NaN	NaN	NaN	NaN	NaN	NaN	NaN	NaN	NaN	NaN	NaN	NaN	NaN	NaN	NaN	NaN	NaN	NaN	NaN	NaN	NaN	NaN	NaN	NaN	NaN	NaN	NaN	NaN	NaN	NaN	NaN	NaN	NaN	NaN	NaN	NaN	NaN	NaN	NaN	NaN	NaN	NaN	NaN	NaN	NaN	NaN
NaN	NaN	NaN	NaN	NaN	NaN	NaN	NaN	NaN	NaN	NaN	NaN	NaN	NaN	NaN	NaN	NaN	NaN	NaN	NaN	NaN	NaN	NaN	NaN	NaN	NaN	NaN	NaN	NaN	NaN	NaN	NaN	NaN	NaN	NaN	NaN	NaN	NaN	NaN	NaN	NaN	NaN	NaN	NaN	NaN	NaN	NaN	NaN	NaN	NaN
NaN	NaN	NaN	NaN	NaN	NaN	NaN	NaN	NaN	NaN	NaN	NaN	NaN	NaN	1.1472	NaN	NaN	NaN	NaN	NaN	NaN	NaN	NaN	NaN	NaN	NaN	0.93471	NaN	NaN	1.011	NaN	NaN	1.0691	NaN	NaN	1.1732	NaN	NaN	NaN	NaN	NaN	NaN	NaN	NaN	1.0808	NaN	NaN	NaN	NaN	NaN
NaN	0.59055	0.6301	NaN	0.37215	NaN	NaN	NaN	NaN	NaN	NaN	NaN	NaN	NaN	NaN	NaN	NaN	1.1726	NaN	0.50123	NaN	NaN	NaN	NaN	NaN	NaN	NaN	NaN	NaN	0.61749	NaN	0.38743	0.74152	NaN	NaN	NaN	NaN	0.4651	0.93009	0.58449	0.59401	NaN	NaN	NaN	NaN	0.56029	NaN	0.65419	NaN	0.76347
0.85856	0.81738	0.99512	0.62421	0.78925	1.2318	0.3438	0.74815	0.82883	0.64337	0.66894	0.92303	0.58452	0.72419	0.93785	0.8645	0.65325	0.99399	0.69328	0.62966	0.89068	0.57093	0.73169	1.059	0.72875	0.74102	0.89772	0.70171	0.63672	0.84803	0.77177	0.80458	0.99694	0.73673	0.74286	1.0517	0.6038	0.78961	1.0318	0.79818	0.69259	1.1273	0.76599	0.85402	0.99374	1.1815	0.73456	0.75205	1.3936	0.77912
0.90246	NaN	0.96684	0.80834	NaN	1.213	NaN	NaN	0.68994	1.1933	NaN	0.91269	1.3135	NaN	0.82917	NaN	NaN	NaN	NaN	NaN	0.74156	1.173	NaN	0.92199	0.64774	NaN	0.76578	0.67978	NaN	0.8019	NaN	NaN	1.0735	0.77768	NaN	0.78932	0.70917	NaN	0.90957	0.79426	NaN	NaN	0.75228	NaN	0.66062	NaN	0.53203	0.65407	NaN	NaN
1.0171	NaN	NaN	0.63373	0.69306	NaN	0.4111	NaN	NaN	0.62044	0.66073	NaN	0.67524	NaN	NaN	0.84728	0.63344	NaN	NaN	NaN	NaN	0.57628	0.76223	NaN	0.76351	NaN	NaN	NaN	NaN	NaN	0.76108	NaN	NaN	1.1709	NaN	NaN	0.77215	0.63849	NaN	0.66714	0.51713	NaN	0.89339	0.90953	NaN	1.4301	NaN	0.8735	NaN	0.8361
1.0339	NaN	NaN	0.85683	0.68626	NaN	NaN	NaN	NaN	0.55892	NaN	NaN	0.80298	0.79429	NaN	1.0794	NaN	NaN	NaN	0.9141	NaN	NaN	NaN	NaN	0.83215	NaN	NaN	NaN	0.77846	NaN	0.83377	NaN	NaN	0.60368	NaN	NaN	NaN	NaN	NaN	0.87909	NaN	NaN	NaN	0.60196	NaN	1.0616	NaN	NaN	NaN	NaN
0.73952	NaN	NaN	NaN	NaN	NaN	NaN	NaN	NaN	0.97599	NaN	NaN	0.94482	NaN	NaN	0.83384	NaN	NaN	1.1234	NaN	NaN	NaN	NaN	NaN	1.0919	NaN	NaN	NaN	NaN	NaN	0.78345	NaN	NaN	0.74714	NaN	NaN	1.1744	NaN	NaN	NaN	NaN	NaN	0.76224	NaN	NaN	NaN	NaN	NaN	NaN	NaN
NaN	NaN	NaN	NaN	NaN	NaN	NaN	NaN	NaN	NaN	NaN	NaN	NaN	NaN	NaN	NaN	NaN	NaN	NaN	NaN	NaN	NaN	NaN	NaN	NaN	NaN	NaN	NaN	NaN	NaN	NaN	NaN	NaN	NaN	NaN	NaN	NaN	NaN	0.82134	NaN	NaN	NaN	NaN	NaN	NaN	NaN	NaN	NaN	NaN	NaN
NaN	NaN	NaN	NaN	NaN	NaN	NaN	NaN	NaN	NaN	NaN	NaN	NaN	NaN	NaN	NaN	NaN	NaN	NaN	NaN	NaN	NaN	NaN	NaN	NaN	NaN	NaN	NaN	NaN	NaN	NaN	NaN	NaN	NaN	NaN	NaN	NaN	NaN	NaN	NaN	NaN	NaN	NaN	NaN	NaN	NaN	NaN	NaN	NaN	NaN
NaN	NaN	NaN	NaN	NaN	1.2663	NaN	NaN	1.2883	NaN	NaN	1.0318	NaN	NaN	NaN	NaN	NaN	0.79593	NaN	NaN	0.77669	3.4117	NaN	1.0154	NaN	NaN	NaN	NaN	NaN	0.70249	NaN	NaN	NaN	NaN	NaN	1.2652	1.5596	NaN	1.1722	1.1365	NaN	1.01	NaN	NaN	1.105	NaN	NaN	NaN	NaN	NaN
NaN	NaN	NaN	NaN	NaN	NaN	NaN	0.57088	0.81317	NaN	NaN	NaN	NaN	NaN	NaN	NaN	NaN	NaN	NaN	NaN	NaN	NaN	NaN	NaN	NaN	NaN	NaN	NaN	NaN	NaN	NaN	NaN	NaN	NaN	NaN	NaN	NaN	NaN	NaN	NaN	NaN	NaN	NaN	NaN	NaN	NaN	NaN	NaN	NaN	NaN
NaN	NaN	NaN	NaN	NaN	NaN	NaN	NaN	NaN	NaN	NaN	NaN	NaN	NaN	NaN	NaN	NaN	NaN	NaN	NaN	NaN	NaN	NaN	NaN	NaN	NaN	NaN	NaN	NaN	NaN	NaN	NaN	NaN	NaN	NaN	NaN	NaN	NaN	NaN	NaN	NaN	NaN	NaN	NaN	NaN	NaN	NaN	NaN	NaN	NaN
NaN	0.80167	NaN	NaN	NaN	NaN	NaN	NaN	NaN	NaN	NaN	NaN	NaN	0.53245	NaN	0.85777	NaN	NaN	0.55463	0.59914	NaN	NaN	0.55669	NaN	0.96105	0.71667	NaN	NaN	NaN	NaN	NaN	0.66105	NaN	0.70647	NaN	NaN	NaN	NaN	NaN	NaN	NaN	NaN	NaN	NaN	NaN	0.84916	NaN	NaN	NaN	NaN
0.83362	0.76903	0.99583	0.62362	0.6272	1.226	0.4038	0.4807	0.86331	0.87578	0.49814	0.84345	0.7015	0.54255	0.85303	0.90851	0.55156	0.92784	0.71275	0.53184	0.83153	0.79768	0.59551	0.92851	0.78081	0.47908	1.0788	0.7491	0.45759	0.88078	0.57578	0.6225	0.83428	0.74392	0.37378	0.98417	0.6284	0.55307	1.0593	0.68628	NaN	1.1393	0.69126	0.55167	0.76154	0.75624	0.73479	0.4557	1.2604	0.51907
0.94129	0.72819	0.98732	0.63371	0.69103	1.1846	0.40694	0.70408	1.0876	0.88324	0.68367	0.83063	0.60647	0.72902	1.1008	0.8135	0.68126	1.0914	0.63902	0.564	0.94322	0.597	0.7254	0.93279	0.79816	0.68397	0.76863	0.78313	0.64737	0.72497	0.93082	0.73266	0.82753	0.79315	0.80162	1.12	0.65062	0.76068	1.0756	0.77386	0.70177	1.1303	0.77409	0.84886	0.96426	1.111	0.81254	0.79474	1.227	0.77554
0.94984	0.79233	1.0347	0.68498	0.88621	1.0887	0.47586	0.76986	0.91006	1.713	0.79834	1.1246	0.86807	0.81049	1.0992	1.1974	0.73931	0.95718	0.91297	0.71498	0.86111	1.4003	0.86625	1.1805	0.98339	0.8971	1.0363	0.93463	0.8427	0.89607	1.0918	0.91948	1.0889	1.0143	0.89468	1.1322	0.79513	0.83102	1.0821	0.93595	0.81651	1.2005	0.91028	0.82375	0.90969	1.0252	0.84297	0.82641	1.5602	0.64721
0.94715	0.77348	1.0588	0.64125	0.79945	0.99973	0.44009	0.61776	0.92259	0.74384	0.7565	0.74989	0.59099	0.77828	0.91437	0.91897	0.67528	1.0291	0.77055	0.636	0.85856	0.74594	0.7728	1.0221	0.86465	0.72146	0.76619	0.72212	0.79819	0.78835	0.77163	0.75302	0.94098	0.72434	0.65378	0.89971	0.64872	0.79788	0.70933	0.90133	0.80843	0.97508	0.77553	0.69186	0.78143	1.0513	0.76691	0.69784	1.2494	0.6129
0.93576	0.7849	0.95436	0.71513	0.69312	1.0271	0.40806	0.634	0.87798	0.83166	0.55025	0.9636	0.64535	0.65271	1.0477	0.91716	0.65037	1.1743	0.75717	0.60253	0.90287	0.67534	0.7506	1.1153	0.72449	0.68108	0.92398	0.74421	0.61342	0.92608	0.80776	0.69101	1.0859	0.69494	0.62206	1.0814	0.67022	0.72385	1.1418	0.89925	0.62752	1.167	0.74247	0.66213	0.95843	0.87238	0.77785	0.63184	1.2591	0.70014
0.81291	0.77782	1.0484	0.96395	NaN	1.2453	NaN	NaN	0.84456	1.9294	NaN	0.81219	0.44685	NaN	0.87398	0.79611	NaN	0.9217	0.59267	NaN	0.76218	2.5318	NaN	0.8207	0.4776	NaN	0.88213	NaN	NaN	0.85943	NaN	NaN	0.96102	NaN	0.45348	1.0152	NaN	NaN	0.88494	NaN	0.68538	0.95244	0.44291	0.78038	0.90333	0.58471	0.67984	0.81805	1.3558	0.46454
0.94932	NaN	NaN	0.96125	NaN	NaN	NaN	NaN	0.90144	NaN	NaN	NaN	NaN	NaN	NaN	NaN	NaN	0.98452	NaN	NaN	NaN	0.66439	NaN	0.99635	0.86324	NaN	0.78364	0.77361	NaN	NaN	NaN	NaN	0.9429	NaN	NaN	NaN	0.88745	NaN	0.7996	NaN	NaN	1.0789	NaN	NaN	0.81898	NaN	0.89917	NaN	NaN	NaN
NaN	NaN	NaN	NaN	NaN	NaN	NaN	NaN	NaN	NaN	NaN	NaN	NaN	NaN	NaN	NaN	NaN	NaN	NaN	NaN	NaN	NaN	NaN	NaN	NaN	NaN	NaN	NaN	NaN	NaN	NaN	NaN	NaN	NaN	NaN	NaN	NaN	NaN	NaN	NaN	NaN	NaN	NaN	NaN	NaN	NaN	NaN	NaN	NaN	NaN
0.85253	0.78526	1.0978	0.56064	0.71387	1.2661	0.39013	0.61758	0.90705	0.56602	0.58873	0.85676	0.61998	0.63967	0.88612	0.82238	0.57685	1.0661	0.64424	0.55715	0.8493	0.58179	0.67447	1.1625	0.70709	0.62361	1.3011	0.74242	0.61872	0.82219	0.74244	0.73612	0.93505	0.73572	0.63931	0.89555	0.59815	0.73421	1.1814	0.7449	0.66774	1.269	0.76918	0.73009	1.0399	1.0225	0.6682	0.70002	1.4905	0.68359
0.99246	0.99908	NaN	0.63909	0.83827	NaN	0.35112	1.0076	NaN	0.71577	NaN	NaN	0.64949	0.65346	NaN	0.76962	0.52963	NaN	0.76079	0.49763	NaN	0.73532	0.84811	NaN	0.79572	0.55412	NaN	0.77769	0.77408	NaN	0.69529	0.70262	NaN	0.74249	0.54286	NaN	0.64981	1.0422	NaN	0.72062	0.55643	NaN	0.7861	1.2072	NaN	NaN	NaN	NaN	NaN	0.93759
NaN	NaN	NaN	NaN	NaN	NaN	NaN	NaN	NaN	NaN	NaN	NaN	NaN	NaN	NaN	NaN	NaN	NaN	NaN	NaN	NaN	NaN	NaN	NaN	NaN	NaN	NaN	NaN	NaN	NaN	NaN	NaN	NaN	NaN	NaN	NaN	NaN	NaN	NaN	NaN	NaN	NaN	NaN	NaN	NaN	NaN	NaN	NaN	NaN	NaN
NaN	NaN	NaN	NaN	NaN	NaN	NaN	NaN	NaN	NaN	NaN	NaN	NaN	NaN	NaN	NaN	NaN	NaN	NaN	NaN	NaN	NaN	NaN	NaN	NaN	NaN	NaN	NaN	NaN	NaN	NaN	NaN	NaN	NaN	NaN	NaN	NaN	NaN	NaN	NaN	NaN	NaN	NaN	NaN	NaN	NaN	NaN	NaN	NaN	NaN
0.92398	0.81671	0.97141	0.74124	0.60284	NaN	0.47023	0.56235	1.0092	0.58587	0.61602	0.7594	0.6025	0.74148	NaN	0.82485	NaN	0.82153	NaN	0.51773	NaN	0.57136	NaN	0.94179	0.69236	0.65619	0.68611	0.63339	NaN	NaN	0.88281	0.81277	NaN	0.74471	NaN	NaN	0.57626	NaN	0.77801	0.68001	0.63473	0.74706	0.66175	0.70639	0.84239	1.0069	0.56471	0.75735	NaN	0.60648
0.92405	0.80428	1.0252	0.80411	0.59585	0.93971	0.37259	0.49885	0.8479	1.0282	0.64518	0.73917	0.67207	0.82549	0.92742	0.91364	0.52562	0.88057	0.83322	1.0003	0.73519	0.98587	NaN	1.0317	0.86895	0.64133	0.70728	0.84954	0.5996	0.56155	0.69194	0.79834	0.95625	0.84109	0.83548	0.92679	0.90609	0.62886	0.88156	0.84697	1.117	0.78139	0.87535	1.1422	0.91364	1.3032	0.62678	0.86445	1.2288	0.99875
0.89174	0.6539	1.0277	0.65109	0.73698	1.4903	0.39394	0.67418	0.6705	0.7503	0.58577	0.82108	0.69429	0.4928	0.78827	0.84992	0.5116	0.77789	0.61476	0.50246	1.4228	0.63546	0.62659	1.0443	0.83027	0.64577	0.70878	0.68843	0.53103	0.85482	0.70386	0.88057	0.85913	0.72425	0.87763	0.93748	0.6354	0.69764	0.93546	0.7933	0.66435	0.96108	0.70289	0.78954	0.90917	0.9362	0.75909	0.75454	1.1965	0.70483
0.75866	0.77123	0.91239	0.73081	0.52666	1.1055	0.34829	0.52107	0.78958	1.1311	0.65436	0.68208	0.53911	0.55768	0.97521	0.7153	0.5903	0.81765	0.74279	0.69684	0.87885	1.1434	0.58557	0.82212	0.66728	0.45239	0.62435	0.65368	0.53453	0.63	0.68933	0.61115	0.71712	0.92902	0.43485	0.98238	0.89681	0.49569	0.95772	0.7787	0.46018	0.71804	0.64863	0.82049	0.80824	1.2854	0.7654	0.54179	1.3548	0.46975
0.88137	0.82769	0.97284	0.79875	0.64375	1.0371	0.44316	0.56796	0.87959	1.0416	0.71348	0.9215	0.63443	0.62114	0.95583	0.86343	0.67799	0.99758	0.71939	0.59925	0.77596	0.9221	0.72539	1.0244	0.70401	0.65869	0.78237	0.68775	0.64271	0.75316	0.6853	0.78259	0.94798	0.82495	0.77746	0.9563	0.75039	0.61897	0.92896	0.78428	0.79448	0.94342	0.76113	0.77925	0.906	0.99843	0.68241	0.80265	1.224	0.78115
0.94444	NaN	0.95896	0.69526	NaN	NaN	NaN	NaN	NaN	0.85025	NaN	NaN	0.63635	NaN	NaN	0.98684	NaN	NaN	NaN	NaN	NaN	0.68204	NaN	NaN	NaN	NaN	NaN	0.81719	NaN	NaN	0.74262	NaN	NaN	0.77864	NaN	NaN	NaN	0.63002	NaN	0.38794	NaN	NaN	0.81007	NaN	NaN	NaN	NaN	NaN	NaN	NaN
0.88626	0.83543	0.96606	0.70205	0.54273	1.1104	0.37822	0.42753	0.93263	0.82744	0.61489	0.59522	0.60874	0.46751	0.77615	0.88482	0.51558	0.7933	0.75325	0.64381	0.71734	0.85442	0.5572	0.85716	0.75321	0.6354	0.65189	0.71113	0.54341	0.71126	0.65166	0.74136	0.71065	0.81096	0.48791	0.74041	0.75943	0.5061	0.74517	0.74192	0.55663	0.85863	0.76312	0.69856	0.7896	0.80198	0.54145	0.51716	1.2519	0.65218
0.9276	NaN	NaN	NaN	NaN	NaN	NaN	0.48334	NaN	NaN	NaN	NaN	NaN	NaN	NaN	NaN	NaN	NaN	0.76368	NaN	NaN	NaN	0.96378	NaN	NaN	0.85867	NaN	0.80024	NaN	NaN	NaN	0.91031	NaN	NaN	NaN	NaN	NaN	NaN	NaN	0.82637	NaN	NaN	NaN	NaN	NaN	1.0548	NaN	0.56489	NaN	0.8986
0.84443	0.79034	1.0185	0.66092	0.63447	1.0955	0.33295	0.57191	0.86803	0.88133	0.70409	0.82071	0.62157	0.65541	0.86071	0.80308	0.63264	0.88221	0.78387	0.72501	0.80246	0.87264	0.64204	0.9122	0.67503	0.59342	0.71955	0.63771	0.65219	0.71152	0.60632	0.69136	0.79947	0.76055	0.58368	0.84852	0.82409	0.60468	0.85529	0.81131	0.636	0.98856	0.76113	0.65114	0.8565	0.91069	0.79092	0.62901	1.0581	0.6534
0.66281	0.78695	0.85695	0.73233	0.70073	0.93527	0.48439	0.69807	0.98118	0.73082	0.7563	0.88621	0.69762	0.72081	0.80804	0.77557	0.74581	1.0003	0.66763	0.69623	0.85879	0.70889	0.74429	0.90449	0.73319	0.83203	0.86676	0.70424	0.7252	0.76128	0.83504	0.92571	0.85904	0.68914	0.73641	0.98384	0.72487	0.81379	0.85182	0.73817	0.70785	0.85545	0.83619	1.194	0.91147	1.6975	0.82695	1.3739	1.3779	1.0613
0.88174	0.81259	1.3523	0.62628	0.84438	1.0301	0.43462	0.81115	0.81414	0.6143	0.94995	0.75403	0.58893	0.75624	0.84279	1.0641	1.0759	1.091	0.73532	0.79075	0.88352	0.60387	0.82284	0.97631	0.70969	1.0583	1.0742	0.78217	1.0022	0.8075	1.0379	1.1169	1.0456	0.85775	NaN	1.009	0.74939	0.8936	1.0318	0.83432	NaN	1.1323	1.2207	NaN	1.0481	1.3208	NaN	0.69498	NaN	1.1657
NaN	NaN	NaN	NaN	NaN	NaN	NaN	NaN	NaN	NaN	NaN	NaN	NaN	NaN	NaN	NaN	NaN	NaN	NaN	NaN	NaN	NaN	NaN	NaN	NaN	NaN	NaN	NaN	NaN	NaN	NaN	NaN	NaN	NaN	NaN	NaN	NaN	NaN	NaN	NaN	NaN	NaN	NaN	NaN	NaN	NaN	NaN	NaN	NaN	NaN
0.87609	NaN	NaN	0.56716	0.44879	NaN	NaN	0.60111	NaN	0.6733	NaN	1.0957	0.61463	NaN	NaN	NaN	NaN	NaN	0.69509	NaN	NaN	0.67343	NaN	NaN	0.91267	NaN	NaN	NaN	NaN	NaN	NaN	NaN	NaN	0.6359	NaN	NaN	NaN	NaN	NaN	NaN	NaN	NaN	NaN	NaN	NaN	NaN	NaN	0.54686	NaN	NaN
0.96323	0.72826	0.9862	0.68425	0.72873	1.2505	0.37683	0.72	0.91881	0.6789	0.59201	0.63318	0.6634	0.77856	0.86899	0.88449	0.73866	0.93808	0.89069	0.64484	0.93119	0.68885	0.73816	0.80295	0.79516	0.79664	0.67434	0.70622	0.59867	0.72779	0.8926	0.76641	0.9017	0.80691	0.51367	0.84285	0.76024	0.77426	0.82597	0.84394	0.55392	0.80405	0.86982	0.62938	0.81724	1.0436	0.81215	0.64854	1.2618	0.6166
0.8804	0.76801	1.04	0.67064	0.78169	1.1053	0.39396	0.68956	0.90617	0.7053	0.67069	0.87283	0.64835	0.74339	0.93603	0.8572	0.70004	1.0002	0.74286	0.64595	0.86129	0.57719	0.69983	1.01	0.78912	0.74353	0.87578	0.74908	0.70672	0.85293	0.79237	0.81458	0.98342	0.77296	0.70678	1.0575	0.64754	0.78777	0.97978	0.81253	0.61043	1.0471	0.75498	0.7271	0.9685	1.0586	0.75948	0.69037	1.3918	0.76971
1.027	0.75467	1.0315	0.67365	0.80783	1.0858	0.40006	0.6606	0.92283	0.64836	0.69451	0.90256	0.65935	0.66492	0.9353	0.96413	0.66289	1.0517	0.71265	0.66944	0.94488	0.5981	0.7607	1.059	0.85286	0.78511	1.0249	0.74275	0.63163	0.86309	0.84728	0.7466	0.95136	0.84035	0.63908	0.95653	0.65517	0.75121	1.018	0.84132	0.65793	1.0846	0.78656	0.71899	0.96285	1.0225	0.75248	0.70217	1.3761	0.71831
0.93135	0.77616	0.97411	0.76204	0.62209	1.0383	0.34641	0.47429	0.76036	0.98819	0.63653	0.73503	0.59335	0.51542	0.86459	0.78708	0.56182	0.93105	0.75105	0.64201	0.80297	0.96894	0.5832	0.93122	0.69557	0.51931	0.59374	0.63777	0.52634	0.70515	0.70789	0.65627	0.8325	0.80382	0.48924	0.9517	0.80759	0.48292	0.88438	0.76853	0.58581	0.88888	0.77775	0.62839	0.89187	0.93518	0.65599	0.57726	1.1892	0.61461
0.73717	0.836	NaN	0.50522	0.59846	NaN	NaN	0.48299	NaN	NaN	NaN	NaN	0.46783	0.52455	NaN	0.88865	0.50629	NaN	0.4795	NaN	NaN	0.71841	1.1152	0.67716	NaN	NaN	NaN	NaN	0.56816	NaN	0.83384	NaN	NaN	0.72557	0.58623	NaN	NaN	NaN	NaN	0.74126	0.94004	NaN	0.70767	0.92372	NaN	0.95789	NaN	0.63536	NaN	NaN
NaN	0.62675	1.042	0.66866	0.64311	0.96011	0.37783	0.48801	0.91264	NaN	0.58657	0.79972	0.58825	0.57496	0.81201	0.78063	0.52021	0.84893	0.65141	0.60566	0.66725	0.8834	NaN	0.81505	0.79516	0.75267	0.69477	0.66834	0.48825	0.6913	0.63733	0.65392	0.83153	0.69648	0.58015	0.79277	0.70978	NaN	0.75458	0.73519	0.61056	0.81275	0.65326	0.83501	0.87656	0.79383	0.56741	0.63311	1.238	0.59371
0.81751	0.75618	1.1669	0.65867	0.82024	NaN	0.42609	0.64587	0.87874	0.58713	0.67274	0.87471	0.59879	0.71766	0.99733	0.91479	0.65209	1.0732	0.83479	0.60164	0.99348	0.55573	0.78345	1.0737	0.73636	0.7876	0.81594	0.71783	0.60994	0.86022	0.75251	0.93003	1.1142	0.57816	0.6273	1.1059	0.60516	0.75103	0.99559	0.69241	0.84897	0.97042	0.72347	0.75509	1.0054	1.0762	0.74278	0.91402	1.5673	1.1016
0.79766	NaN	1.0851	0.62717	NaN	1.0721	0.2824	NaN	NaN	0.90939	0.57707	NaN	0.54654	0.5673	NaN	0.64128	0.54515	NaN	0.62657	0.67246	0.86799	0.9241	NaN	NaN	0.61516	0.75537	NaN	0.57114	0.69366	NaN	0.63895	0.67941	NaN	0.77839	NaN	NaN	0.73271	0.72052	NaN	0.79107	0.69062	NaN	0.70668	0.43206	NaN	0.82843	0.64014	0.7002	NaN	0.56761
0.99187	0.67947	NaN	0.87791	0.79867	NaN	0.4262	0.69263	NaN	0.94605	0.69321	NaN	0.62991	0.75264	NaN	1.0071	0.57927	0.81736	0.72926	0.55859	NaN	0.64758	0.68932	0.86718	0.81899	0.63352	0.89056	0.80412	0.57984	NaN	0.85811	0.63618	NaN	0.79514	0.56103	NaN	0.76127	0.66133	0.91062	0.81204	0.47892	0.96288	0.83151	0.72727	NaN	1.1954	0.6363	0.57624	1.4274	0.73684
0.81005	0.64034	0.98347	0.5355	0.71084	NaN	0.38269	0.70642	0.67449	0.58214	0.66161	0.89946	0.6268	0.56885	NaN	0.77604	0.93973	1.0117	0.63729	0.55162	NaN	0.57008	0.8087	1.1261	0.71634	0.79306	1.1372	0.68322	0.52678	0.95405	0.83241	0.76638	NaN	0.72041	0.69993	1.0095	0.67655	0.8168	0.85514	0.7964	0.71453	1.2029	0.82693	0.8382	0.93439	1.1979	0.73959	0.76555	NaN	0.82137
NaN	NaN	NaN	NaN	NaN	NaN	NaN	NaN	NaN	NaN	NaN	NaN	NaN	NaN	NaN	NaN	NaN	1.2375	NaN	NaN	NaN	NaN	NaN	1.4973	NaN	NaN	NaN	NaN	NaN	NaN	NaN	NaN	NaN	NaN	NaN	NaN	NaN	NaN	1.2122	NaN	NaN	NaN	NaN	NaN	NaN	NaN	0.8824	NaN	NaN	NaN
0.8352	NaN	NaN	0.70606	NaN	NaN	NaN	NaN	NaN	1.0271	NaN	NaN	0.59738	NaN	NaN	0.8019	0.93435	NaN	0.6182	NaN	NaN	0.87111	NaN	NaN	0.69342	NaN	NaN	0.71241	NaN	NaN	NaN	NaN	NaN	0.77766	NaN	NaN	0.74436	NaN	NaN	NaN	NaN	NaN	NaN	NaN	NaN	0.99653	NaN	NaN	NaN	NaN
NaN	NaN	NaN	NaN	NaN	NaN	NaN	NaN	NaN	NaN	NaN	NaN	NaN	NaN	NaN	NaN	NaN	NaN	NaN	NaN	NaN	NaN	NaN	NaN	NaN	NaN	NaN	NaN	NaN	NaN	NaN	NaN	NaN	NaN	NaN	NaN	NaN	NaN	NaN	NaN	NaN	NaN	NaN	NaN	NaN	NaN	NaN	NaN	NaN	NaN
0.96552	0.65778	0.76839	0.44331	0.57387	1.346	0.62415	0.54516	0.78835	1.6183	0.56645	0.97724	0.57995	0.60105	0.98011	0.94971	0.64186	0.97817	0.76522	0.6131	NaN	1.7681	0.70637	1.2929	0.73074	0.53741	1.0235	0.73143	0.59226	0.83675	0.86934	0.67867	1.0479	0.85938	0.73637	0.95386	0.61181	0.98286	1.1266	NaN	0.43296	1.4668	0.55648	0.44558	0.96595	0.63781	0.83521	0.55286	1.6022	0.61667
0.8734	0.79788	1.0272	0.61662	0.74405	1.1633	0.47387	0.619	0.91091	0.98359	0.62137	0.99632	0.61465	0.65555	1.1703	0.91122	0.62498	0.86362	0.75882	0.55243	0.86116	0.76131	0.68473	1.0692	0.7306	0.65562	0.78642	0.79273	0.56299	1.1463	0.71441	0.68718	0.96679	0.81824	0.75543	1.1519	0.68784	0.65387	1.0342	0.72521	0.57998	1.035	0.72162	0.73444	1.0361	0.84964	NaN	0.61342	1.4501	0.70342
NaN	NaN	NaN	NaN	NaN	NaN	NaN	NaN	NaN	NaN	NaN	NaN	NaN	NaN	NaN	NaN	NaN	NaN	NaN	NaN	NaN	NaN	NaN	NaN	NaN	NaN	NaN	NaN	NaN	NaN	NaN	NaN	NaN	NaN	NaN	NaN	NaN	NaN	NaN	NaN	NaN	NaN	NaN	NaN	NaN	NaN	NaN	NaN	NaN	NaN
NaN	NaN	NaN	NaN	NaN	NaN	NaN	NaN	NaN	NaN	NaN	NaN	NaN	NaN	NaN	NaN	NaN	NaN	NaN	NaN	NaN	NaN	NaN	NaN	NaN	NaN	NaN	NaN	NaN	NaN	NaN	NaN	NaN	NaN	NaN	NaN	NaN	NaN	NaN	NaN	NaN	NaN	NaN	NaN	NaN	NaN	NaN	NaN	NaN	NaN
NaN	NaN	NaN	NaN	NaN	NaN	NaN	NaN	NaN	NaN	NaN	NaN	NaN	NaN	NaN	NaN	NaN	NaN	NaN	NaN	NaN	NaN	NaN	NaN	NaN	NaN	NaN	NaN	NaN	NaN	NaN	NaN	NaN	NaN	NaN	NaN	NaN	NaN	NaN	NaN	NaN	NaN	NaN	NaN	NaN	NaN	NaN	NaN	NaN	NaN
NaN	0.77719	NaN	NaN	NaN	NaN	NaN	NaN	NaN	NaN	NaN	NaN	NaN	NaN	NaN	NaN	0.57735	NaN	0.88112	NaN	NaN	NaN	NaN	NaN	NaN	NaN	NaN	NaN	NaN	NaN	NaN	NaN	NaN	NaN	NaN	NaN	NaN	NaN	NaN	NaN	NaN	NaN	NaN	NaN	NaN	NaN	NaN	NaN	NaN	NaN
1.0359	0.92867	0.97559	0.65817	0.79135	1.0477	0.34721	0.64758	NaN	0.75287	0.68818	0.80597	0.60431	0.6469	1.0755	0.84147	0.65555	0.77947	0.7115	0.66858	0.76033	0.683	0.67923	1.1805	0.78105	0.63057	0.92407	0.71944	0.58593	1.043	0.86475	0.81154	NaN	0.7549	0.49826	0.7729	0.61773	0.75309	0.68298	0.71638	0.65006	1.0675	0.71934	0.81034	0.84986	1.0034	0.81252	0.68779	1.3223	0.64276
0.89268	0.78617	0.99794	0.65489	0.75931	1.144	0.38851	0.6447	0.86377	0.71832	0.66958	0.95034	0.64777	0.66037	0.94138	0.82801	0.65056	0.99714	0.70145	0.59975	0.88553	0.64036	0.68202	0.99595	0.76792	0.70543	0.87212	0.7135	0.66057	0.81529	0.76508	0.74835	0.93478	0.77883	0.70158	0.94333	0.64372	0.74253	0.94829	0.77614	0.66778	1.0562	0.72821	0.77198	0.9283	1.1026	0.73742	0.78439	1.3249	0.79649
NaN	NaN	NaN	NaN	NaN	NaN	NaN	NaN	NaN	NaN	NaN	NaN	NaN	NaN	NaN	NaN	NaN	NaN	NaN	NaN	NaN	NaN	NaN	NaN	NaN	NaN	NaN	NaN	NaN	NaN	NaN	NaN	NaN	NaN	NaN	NaN	NaN	NaN	NaN	NaN	NaN	NaN	NaN	NaN	NaN	NaN	NaN	NaN	NaN	NaN
0.87058	0.76117	1.0637	0.62691	0.73048	1.2915	0.37647	0.68067	0.86342	0.68478	0.64608	0.88637	0.59103	0.61788	0.99485	0.72597	0.63918	0.97993	0.65699	0.49158	0.91525	0.57913	0.60413	1.088	0.74259	0.74528	0.87654	0.61099	0.60389	0.84589	0.70368	0.73967	0.74378	0.69709	0.68211	1.2068	0.59323	0.73948	0.84663	0.72767	0.65049	1.0521	0.67145	0.75678	0.89828	1.1149	0.75503	0.78519	1.239	0.91862
0.89678	0.88224	0.84758	0.74134	0.79616	1.1098	0.53493	0.6315	0.73265	0.82189	0.60133	NaN	0.70888	0.63122	0.83541	0.93496	0.66414	1.0596	0.79954	0.61969	NaN	0.64711	0.6623	NaN	0.71436	0.59449	0.82577	0.87981	0.6753	0.86509	0.9002	0.62999	0.82695	0.78533	0.57355	NaN	0.66858	0.67137	0.91827	0.8315	0.57572	1.149	0.74822	0.67208	0.83659	0.88648	0.75832	0.60957	1.212	0.61052
0.87573	0.80799	1.0363	0.66057	0.75393	1.1202	0.35767	0.67628	0.92525	0.65713	0.62784	0.88468	0.64108	0.66409	0.99047	0.83389	0.62702	0.96253	0.70407	0.61009	0.95839	0.59011	0.6919	0.99279	0.73511	0.69267	0.79876	0.7103	0.62415	0.75509	0.75036	0.77157	0.93756	0.77298	0.67775	0.96383	0.56856	0.77183	0.96181	0.77893	0.68487	1.0082	0.73397	0.74686	0.95109	1.0902	0.70125	0.76147	1.3369	0.78732
NaN	NaN	NaN	NaN	NaN	NaN	NaN	NaN	NaN	NaN	NaN	NaN	NaN	NaN	NaN	NaN	NaN	NaN	NaN	NaN	NaN	NaN	NaN	NaN	NaN	NaN	NaN	NaN	NaN	NaN	NaN	NaN	NaN	NaN	NaN	NaN	NaN	NaN	NaN	NaN	NaN	NaN	NaN	NaN	NaN	NaN	NaN	NaN	NaN	NaN
0.87395	0.78563	0.98009	0.62007	0.71674	1.1026	0.38018	0.63229	0.87065	0.66355	0.62171	0.82842	0.59252	0.66454	0.93212	0.77519	0.62867	0.96682	0.68062	0.58822	0.88444	0.58529	0.70482	0.98153	0.71777	0.69811	0.84787	0.68751	0.62031	0.79819	0.74333	0.76034	0.93302	0.76519	0.66054	0.98044	0.62465	0.78438	0.9291	0.77533	0.67146	1.0063	0.71857	0.74541	0.94734	1.0692	0.71963	0.71846	1.3122	0.78618
NaN	NaN	NaN	NaN	NaN	NaN	NaN	NaN	NaN	NaN	NaN	NaN	NaN	NaN	NaN	NaN	NaN	NaN	NaN	NaN	NaN	0.51206	NaN	NaN	0.66008	NaN	NaN	NaN	NaN	NaN	NaN	NaN	NaN	NaN	NaN	NaN	NaN	0.63882	NaN	NaN	NaN	NaN	NaN	NaN	NaN	NaN	NaN	NaN	NaN	NaN
0.94544	0.83571	0.97131	0.58627	0.64927	1.0096	0.35952	0.67583	0.82536	0.72982	0.54067	0.72804	0.57087	0.65371	0.84543	0.88306	0.61165	0.8692	0.64516	0.55291	0.8069	0.5046	0.6765	0.95243	0.77311	0.67357	0.56085	0.71609	0.67369	0.73151	0.76409	0.72832	0.90964	0.74365	0.99527	0.98751	0.5515	0.76311	0.88887	0.78437	0.90848	1.0299	0.80049	0.972	0.90818	1.2337	0.69438	1.3032	1.2905	0.81449
NaN	NaN	NaN	NaN	NaN	NaN	NaN	NaN	NaN	NaN	NaN	NaN	NaN	NaN	NaN	NaN	NaN	NaN	NaN	NaN	NaN	NaN	NaN	NaN	NaN	NaN	1.0791	NaN	NaN	NaN	NaN	NaN	NaN	NaN	NaN	1.2366	NaN	NaN	0.97693	NaN	NaN	NaN	NaN	NaN	NaN	NaN	NaN	0.69985	NaN	NaN
0.87825	0.61597	1.0279	0.60011	0.61212	1.0159	0.37751	0.57286	0.85165	0.61624	0.66537	0.76675	0.66533	0.57449	1.081	0.79449	0.57687	0.80995	0.66992	0.58497	0.83801	0.59106	0.71862	1.0061	0.81454	0.69763	0.80303	0.65043	0.46581	0.76752	0.82022	0.73972	0.92203	0.78075	0.65312	0.853	0.60971	0.7556	0.86313	0.8333	0.75295	0.95917	0.77926	0.7626	0.9235	0.90525	0.63142	0.71801	1.311	0.67231
0.86941	0.72107	1.0242	0.62003	0.6606	1.0628	0.34394	0.59325	0.77962	0.6944	0.5609	1.0655	0.6328	0.70713	0.85083	0.84603	0.55867	0.99323	0.71664	0.61993	0.85774	0.53201	0.69587	1.0044	0.67876	0.69989	1.056	0.67238	0.55027	0.985	0.76289	0.74975	0.84018	0.81822	0.59492	0.86902	0.62894	0.74816	1.06	0.71546	0.62021	1.0723	0.69964	0.73038	1.1736	0.98335	0.76681	0.77895	1.4335	0.71896
NaN	NaN	NaN	NaN	NaN	NaN	NaN	NaN	NaN	NaN	NaN	NaN	NaN	NaN	NaN	NaN	NaN	NaN	NaN	NaN	NaN	NaN	NaN	NaN	NaN	NaN	NaN	NaN	NaN	NaN	NaN	NaN	NaN	NaN	NaN	NaN	NaN	NaN	NaN	NaN	NaN	NaN	NaN	NaN	NaN	NaN	NaN	NaN	NaN	NaN
NaN	NaN	NaN	NaN	NaN	NaN	NaN	NaN	NaN	NaN	NaN	NaN	NaN	NaN	NaN	NaN	NaN	NaN	NaN	NaN	NaN	NaN	NaN	NaN	NaN	NaN	NaN	NaN	NaN	NaN	NaN	NaN	NaN	NaN	NaN	NaN	NaN	NaN	NaN	NaN	NaN	NaN	NaN	NaN	NaN	NaN	NaN	NaN	NaN	NaN
NaN	0.70294	NaN	NaN	0.8029	NaN	0.31544	0.52942	NaN	NaN	0.54037	NaN	NaN	0.5224	NaN	1.7849	0.54852	NaN	0.93184	NaN	NaN	NaN	NaN	NaN	NaN	0.58775	NaN	NaN	0.55069	NaN	NaN	NaN	NaN	NaN	0.62011	NaN	NaN	NaN	NaN	NaN	NaN	NaN	NaN	NaN	NaN	NaN	NaN	0.80251	NaN	0.82682
NaN	0.75366	NaN	NaN	NaN	NaN	NaN	0.7549	NaN	NaN	NaN	NaN	NaN	0.91025	NaN	NaN	NaN	NaN	NaN	NaN	NaN	NaN	NaN	NaN	NaN	NaN	NaN	NaN	NaN	NaN	NaN	NaN	NaN	0.66887	NaN	NaN	NaN	NaN	NaN	NaN	NaN	NaN	NaN	NaN	NaN	NaN	NaN	NaN	NaN	NaN
NaN	NaN	NaN	NaN	NaN	NaN	NaN	NaN	NaN	NaN	NaN	NaN	NaN	NaN	NaN	NaN	NaN	NaN	NaN	NaN	NaN	NaN	NaN	NaN	NaN	NaN	NaN	NaN	NaN	NaN	NaN	NaN	NaN	NaN	NaN	NaN	NaN	NaN	NaN	NaN	NaN	NaN	NaN	NaN	NaN	NaN	NaN	NaN	NaN	NaN
NaN	NaN	NaN	NaN	NaN	NaN	NaN	0.72714	NaN	NaN	NaN	NaN	NaN	NaN	NaN	NaN	NaN	NaN	0.70561	NaN	NaN	NaN	NaN	NaN	0.58373	0.71243	NaN	NaN	NaN	NaN	0.6934	1.0032	NaN	NaN	NaN	NaN	NaN	NaN	NaN	NaN	0.80297	NaN	NaN	NaN	NaN	1.5374	NaN	NaN	NaN	NaN
NaN	NaN	NaN	NaN	NaN	NaN	NaN	NaN	NaN	NaN	NaN	NaN	NaN	NaN	NaN	NaN	NaN	NaN	NaN	NaN	NaN	NaN	NaN	NaN	NaN	NaN	NaN	NaN	NaN	NaN	NaN	NaN	NaN	NaN	NaN	NaN	NaN	NaN	NaN	NaN	NaN	NaN	NaN	NaN	NaN	NaN	NaN	NaN	NaN	NaN
NaN	NaN	NaN	NaN	NaN	NaN	NaN	NaN	NaN	NaN	NaN	NaN	NaN	NaN	NaN	NaN	NaN	NaN	NaN	NaN	NaN	NaN	NaN	NaN	NaN	NaN	NaN	NaN	NaN	NaN	NaN	NaN	NaN	NaN	NaN	NaN	NaN	NaN	NaN	NaN	NaN	NaN	NaN	NaN	NaN	NaN	NaN	NaN	NaN	NaN
NaN	NaN	NaN	NaN	NaN	NaN	NaN	NaN	NaN	NaN	NaN	NaN	NaN	NaN	NaN	NaN	NaN	NaN	NaN	NaN	NaN	NaN	NaN	NaN	NaN	NaN	NaN	NaN	NaN	NaN	NaN	NaN	NaN	NaN	NaN	NaN	NaN	NaN	NaN	NaN	NaN	NaN	NaN	NaN	NaN	NaN	NaN	NaN	NaN	NaN
0.84809	0.71958	0.96874	0.70429	0.73764	1.0497	0.33168	0.67127	0.90403	0.80113	0.62756	0.80729	0.63211	0.64687	0.82492	0.88746	0.58094	1.006	0.79174	0.58602	0.84493	0.69493	0.65299	0.99983	0.76146	0.65326	0.81525	0.72587	0.64203	0.70634	0.78613	0.72861	0.77482	0.7588	0.61427	0.89351	0.63952	0.71972	0.89116	0.74118	0.56305	0.93885	0.70643	0.86924	0.89769	1.0897	0.70714	0.65291	1.3457	0.65517
NaN	NaN	NaN	NaN	NaN	NaN	NaN	NaN	NaN	NaN	NaN	NaN	NaN	NaN	NaN	NaN	NaN	NaN	NaN	NaN	NaN	NaN	NaN	NaN	NaN	NaN	NaN	NaN	NaN	NaN	NaN	NaN	NaN	NaN	NaN	NaN	NaN	NaN	NaN	NaN	NaN	NaN	NaN	NaN	NaN	NaN	NaN	NaN	NaN	NaN
NaN	NaN	NaN	NaN	NaN	NaN	NaN	NaN	NaN	NaN	NaN	NaN	NaN	NaN	NaN	NaN	NaN	NaN	NaN	NaN	NaN	NaN	NaN	NaN	NaN	NaN	NaN	NaN	NaN	NaN	NaN	NaN	NaN	NaN	NaN	NaN	NaN	NaN	NaN	NaN	NaN	NaN	NaN	NaN	NaN	NaN	NaN	NaN	NaN	NaN
NaN	NaN	NaN	NaN	NaN	NaN	NaN	NaN	NaN	NaN	NaN	NaN	NaN	NaN	NaN	NaN	NaN	NaN	NaN	NaN	NaN	NaN	NaN	NaN	NaN	NaN	NaN	NaN	NaN	NaN	NaN	NaN	NaN	NaN	NaN	NaN	NaN	NaN	NaN	NaN	NaN	NaN	NaN	NaN	NaN	NaN	NaN	NaN	NaN	NaN
NaN	NaN	NaN	NaN	NaN	NaN	NaN	NaN	NaN	NaN	NaN	NaN	NaN	NaN	NaN	NaN	NaN	NaN	NaN	NaN	NaN	NaN	NaN	NaN	NaN	NaN	NaN	NaN	NaN	NaN	NaN	NaN	NaN	NaN	NaN	NaN	NaN	NaN	NaN	NaN	NaN	NaN	NaN	NaN	NaN	NaN	NaN	NaN	NaN	NaN
0.81082	NaN	NaN	NaN	NaN	NaN	NaN	NaN	NaN	NaN	NaN	NaN	NaN	NaN	NaN	NaN	NaN	NaN	NaN	NaN	NaN	NaN	NaN	NaN	NaN	NaN	NaN	NaN	NaN	NaN	NaN	NaN	NaN	NaN	NaN	NaN	NaN	NaN	NaN	NaN	NaN	NaN	0.80524	NaN	NaN	NaN	NaN	NaN	NaN	NaN
NaN	NaN	NaN	NaN	NaN	NaN	NaN	NaN	NaN	NaN	NaN	NaN	NaN	NaN	NaN	NaN	NaN	NaN	NaN	NaN	NaN	NaN	NaN	NaN	NaN	NaN	NaN	NaN	NaN	NaN	NaN	NaN	NaN	NaN	NaN	NaN	NaN	NaN	NaN	NaN	NaN	NaN	NaN	NaN	NaN	NaN	NaN	NaN	NaN	NaN
0.96883	0.77247	1.0272	0.66615	0.81055	1.1134	0.37519	0.74421	1.002	0.77482	0.68034	0.90594	0.75784	0.74912	0.94119	0.89426	0.70628	0.95756	0.7998	0.66942	0.94478	0.70734	0.75323	0.95882	0.79791	0.75944	0.81753	0.85446	0.66514	0.82343	0.84889	0.83987	0.97505	0.90823	0.59824	0.99776	0.65401	0.83541	0.94391	0.88687	0.58741	1.0691	0.81575	0.76465	1.0042	1.0812	0.75793	0.72007	1.3259	0.76871
1.0147	NaN	1.1764	0.5928	0.70677	1.0243	0.39095	0.58326	0.86289	0.61794	0.60282	1.2065	0.56445	0.56118	0.97547	0.88681	NaN	1.005	0.65822	0.63487	0.92938	0.85645	0.76261	NaN	0.7945	NaN	NaN	0.77749	0.59221	NaN	0.60706	0.73944	NaN	0.74681	0.57833	0.93517	0.68614	0.8349	NaN	0.77802	0.8708	1.1855	0.67189	1.1271	NaN	1.0924	0.76159	0.78349	NaN	1.0338
NaN	NaN	NaN	NaN	NaN	NaN	NaN	NaN	NaN	NaN	NaN	NaN	NaN	NaN	NaN	NaN	NaN	NaN	NaN	NaN	NaN	NaN	NaN	NaN	0.95071	NaN	NaN	NaN	NaN	NaN	0.96463	NaN	NaN	0.90899	NaN	NaN	NaN	NaN	NaN	NaN	0.9661	NaN	NaN	NaN	NaN	NaN	NaN	NaN	NaN	1.1048
0.9761	0.7704	0.90131	0.501	0.78639	0.97407	0.33742	0.90958	0.84952	0.61226	0.59114	1.2736	0.65721	0.71872	0.89444	0.92504	0.70965	0.87432	0.66377	0.66434	0.81112	0.64589	0.78836	0.76189	0.83048	0.82238	1.4	0.76793	0.6072	0.74039	1.0898	0.75498	1.0154	0.84842	0.57668	0.87931	0.59485	0.76842	NaN	0.88287	0.64914	0.92662	0.75517	0.69849	0.90166	1.1892	NaN	0.70628	1.4016	0.83249
0.82996	NaN	0.90221	NaN	0.73869	NaN	NaN	0.90061	NaN	1.2431	NaN	NaN	0.75249	0.86852	NaN	NaN	0.64765	NaN	NaN	0.63091	NaN	0.64103	0.72374	NaN	0.62922	NaN	NaN	0.69901	0.65598	NaN	0.63834	0.73096	NaN	0.79989	0.72053	NaN	0.61182	0.7178	NaN	0.61402	NaN	NaN	NaN	0.77398	NaN	1.0109	NaN	0.79541	NaN	0.58972
0.83735	0.85207	NaN	0.74518	0.73678	NaN	0.46499	NaN	NaN	0.88963	0.71451	NaN	0.71099	NaN	0.8234	0.89325	NaN	NaN	0.68105	0.58173	NaN	0.63485	0.93397	0.98219	0.82758	NaN	0.45974	0.67304	NaN	0.64115	NaN	0.70933	NaN	0.70699	NaN	0.38861	0.52351	NaN	NaN	0.82047	0.73428	NaN	0.68775	NaN	NaN	1.0994	NaN	0.60614	NaN	0.6945
0.72938	0.69249	NaN	0.59105	NaN	NaN	NaN	NaN	NaN	0.62436	NaN	NaN	0.5558	0.70816	NaN	0.81518	0.56873	NaN	0.56545	0.96607	NaN	0.54181	0.65894	NaN	0.77126	1.326	NaN	0.78276	0.45754	NaN	1.0926	NaN	NaN	0.80156	1.6319	NaN	0.61202	0.8028	NaN	0.87464	NaN	NaN	0.79201	0.61899	NaN	1.1245	NaN	0.67083	NaN	0.69414
0.96629	0.92722	0.93099	0.74903	0.65871	NaN	0.48978	0.6834	0.78595	0.80503	NaN	NaN	0.71368	0.6052	1.1664	0.82465	0.89485	1.2912	0.70267	NaN	NaN	0.64123	NaN	NaN	0.66014	NaN	1.3361	0.89938	0.62294	0.63653	NaN	0.80381	NaN	0.81841	0.75105	NaN	NaN	0.85715	NaN	0.53872	0.75054	NaN	0.77512	1.0921	1.076	1.5523	0.75672	0.99581	1.3266	0.93515
0.84428	0.7389	1.0226	0.60122	0.73736	1.2597	0.35065	0.70076	0.86681	0.63567	0.67468	0.98797	0.6304	0.60476	0.89894	0.83309	0.59698	0.99162	0.76606	0.62294	0.83872	0.55577	0.69725	0.92727	0.89218	0.81699	0.92933	0.76357	0.59402	0.89966	0.74863	0.83459	0.93575	0.87697	1.7918	1.106	0.63979	0.81549	0.97505	0.77617	1.3346	1.1562	0.73935	0.65835	1.0823	0.81852	0.74592	0.91744	1.3375	0.91864
0.91568	0.86568	1.1879	0.59796	0.8485	1.3655	0.39883	0.73035	0.86807	0.67539	0.68495	1.177	0.61722	0.7615	1.0025	0.80589	0.77409	1.0891	0.67979	0.74641	1.0938	0.5787	0.78813	1.0983	0.78696	0.86224	0.80878	0.67299	0.60463	0.81372	0.80058	0.85197	1.2064	0.71539	0.70445	1.1215	0.63006	0.89699	0.98279	0.80118	0.68441	1.0579	0.67621	0.697	0.95918	1.1094	0.75989	0.74166	1.3341	0.74327
NaN	NaN	NaN	NaN	NaN	NaN	NaN	NaN	NaN	NaN	NaN	NaN	NaN	NaN	NaN	NaN	NaN	NaN	NaN	NaN	NaN	NaN	NaN	NaN	NaN	NaN	NaN	NaN	NaN	NaN	NaN	NaN	NaN	NaN	NaN	NaN	NaN	NaN	NaN	NaN	NaN	NaN	NaN	NaN	NaN	NaN	NaN	NaN	NaN	NaN
NaN	NaN	NaN	NaN	NaN	NaN	NaN	NaN	NaN	NaN	NaN	NaN	NaN	NaN	NaN	1.213	NaN	NaN	NaN	NaN	NaN	NaN	NaN	NaN	NaN	NaN	NaN	NaN	NaN	NaN	1.0812	NaN	NaN	NaN	NaN	NaN	NaN	NaN	NaN	NaN	NaN	NaN	NaN	NaN	NaN	NaN	NaN	NaN	NaN	NaN
NaN	NaN	NaN	NaN	NaN	NaN	NaN	NaN	NaN	NaN	NaN	NaN	1.0384	NaN	NaN	NaN	NaN	NaN	NaN	NaN	NaN	NaN	NaN	NaN	NaN	NaN	NaN	NaN	NaN	NaN	NaN	NaN	NaN	NaN	NaN	NaN	NaN	NaN	NaN	NaN	NaN	NaN	NaN	NaN	NaN	NaN	NaN	NaN	NaN	NaN
NaN	NaN	1.0008	NaN	NaN	1.1545	NaN	NaN	0.74289	NaN	NaN	0.80813	NaN	NaN	0.82577	NaN	NaN	0.89658	NaN	NaN	0.89437	1.7401	NaN	0.90026	NaN	NaN	0.65793	NaN	NaN	0.64925	NaN	NaN	0.79395	NaN	NaN	0.93062	NaN	NaN	0.83728	NaN	NaN	1.0157	NaN	NaN	0.80399	NaN	0.72881	NaN	1.1358	NaN
1.1255	NaN	1.0918	0.6588	NaN	0.98304	NaN	NaN	NaN	0.73386	NaN	0.90031	NaN	NaN	0.88508	0.77848	0.67053	0.9955	0.83274	NaN	0.9891	0.62634	NaN	1.02	0.7665	NaN	0.82174	0.68687	NaN	0.67316	0.83968	NaN	NaN	0.69902	0.73425	1.0206	0.72176	NaN	1.0102	0.74277	NaN	1.0476	0.78391	0.93069	0.94063	1.2098	0.6814	0.98807	1.179	0.99271
NaN	NaN	NaN	NaN	NaN	NaN	NaN	NaN	NaN	NaN	NaN	NaN	NaN	NaN	NaN	NaN	NaN	NaN	NaN	NaN	NaN	NaN	NaN	NaN	NaN	NaN	NaN	NaN	NaN	NaN	NaN	NaN	NaN	1.5785	NaN	NaN	NaN	NaN	NaN	NaN	NaN	NaN	0.96253	NaN	NaN	NaN	NaN	NaN	NaN	NaN
NaN	NaN	NaN	NaN	NaN	NaN	NaN	NaN	NaN	NaN	NaN	NaN	NaN	NaN	NaN	NaN	NaN	NaN	NaN	NaN	NaN	NaN	NaN	NaN	NaN	NaN	NaN	NaN	NaN	NaN	NaN	NaN	NaN	NaN	NaN	NaN	NaN	NaN	NaN	NaN	NaN	NaN	NaN	NaN	NaN	NaN	NaN	NaN	NaN	NaN
0.87852	0.76321	1.0689	0.60197	0.76768	1.1794	0.41286	0.66555	0.87619	0.67182	0.72548	0.96573	0.63278	0.79657	0.99324	0.81033	0.59476	0.93738	0.64405	0.63415	1.0071	0.57441	0.69395	1.1437	0.73816	0.73319	0.92865	0.74245	0.57103	0.86959	0.69782	0.83105	1.1326	0.67895	0.80323	1.067	0.67014	0.87117	0.98068	0.76093	0.62542	1.1624	0.77637	0.83997	1.0256	1.2534	0.80282	0.87192	1.4773	0.7438
0.67816	NaN	NaN	0.60148	NaN	NaN	0.2766	NaN	NaN	NaN	NaN	NaN	NaN	NaN	NaN	NaN	NaN	NaN	NaN	NaN	NaN	0.83978	NaN	NaN	0.63772	NaN	NaN	NaN	NaN	0.72705	NaN	NaN	NaN	NaN	NaN	NaN	0.79541	NaN	NaN	0.85831	NaN	1.064	NaN	NaN	NaN	NaN	NaN	NaN	0.99751	NaN
NaN	NaN	0.79724	NaN	NaN	NaN	NaN	NaN	0.75484	NaN	NaN	0.74749	NaN	NaN	0.91534	NaN	NaN	NaN	NaN	NaN	NaN	NaN	NaN	NaN	NaN	NaN	NaN	NaN	NaN	0.96179	NaN	NaN	NaN	NaN	NaN	NaN	NaN	NaN	NaN	0.79369	NaN	NaN	NaN	NaN	0.86796	NaN	NaN	NaN	NaN	NaN
0.93714	0.86617	1.0101	0.79532	0.80068	1.1736	0.4856	0.70994	0.75658	0.8183	0.67691	0.829	0.71955	0.67448	1.0306	0.9714	0.67725	1.0772	0.85223	0.66433	1.0674	0.81864	0.72102	1.0965	0.8487	0.80161	0.84143	0.83507	0.691	0.90765	0.87749	0.8267	0.86929	0.85555	0.62327	1.0263	0.71821	0.75099	1.0458	0.94901	0.63209	1.0389	0.85291	0.70107	0.93839	1.0865	0.7259	0.74799	1.2307	0.78976
NaN	NaN	NaN	NaN	NaN	1.3867	NaN	NaN	NaN	NaN	NaN	NaN	NaN	NaN	NaN	NaN	NaN	NaN	NaN	0.72147	1.1197	NaN	1.3959	NaN	NaN	NaN	NaN	NaN	NaN	NaN	NaN	NaN	NaN	NaN	NaN	NaN	NaN	NaN	NaN	NaN	NaN	NaN	NaN	NaN	NaN	NaN	NaN	NaN	NaN	NaN
1.1172	NaN	NaN	NaN	NaN	NaN	NaN	NaN	NaN	NaN	NaN	NaN	NaN	0.54758	NaN	NaN	1.0648	NaN	NaN	0.52735	NaN	0.50216	0.59941	NaN	NaN	NaN	NaN	0.88884	NaN	NaN	NaN	0.68869	NaN	NaN	0.66381	NaN	0.60681	NaN	NaN	0.64407	0.62696	NaN	0.79703	0.51085	NaN	NaN	NaN	NaN	NaN	0.51791
NaN	0.93023	NaN	NaN	NaN	NaN	NaN	NaN	NaN	NaN	NaN	NaN	NaN	NaN	NaN	NaN	NaN	NaN	NaN	NaN	NaN	NaN	NaN	NaN	NaN	NaN	NaN	NaN	NaN	NaN	NaN	NaN	NaN	NaN	NaN	NaN	NaN	NaN	NaN	NaN	NaN	NaN	NaN	NaN	NaN	NaN	NaN	NaN	NaN	NaN
NaN	NaN	0.85027	NaN	1.4195	2.0214	NaN	0.83078	0.84941	2.0821	NaN	0.82844	NaN	NaN	NaN	NaN	NaN	0.98735	NaN	0.4183	NaN	3.4272	NaN	NaN	NaN	0.827	0.8153	0.69167	0.74877	0.98167	1.0866	NaN	1.3836	NaN	1.0411	NaN	NaN	0.80403	NaN	NaN	NaN	NaN	NaN	0.96245	NaN	1.0871	1.0845	NaN	1.8101	NaN
0.88914	0.70789	0.93761	0.60716	0.70338	1.1196	0.36511	0.63361	0.8922	0.69044	0.56521	0.80753	0.60133	0.6206	0.83897	0.86963	0.6032	0.93524	0.73609	0.55195	0.89856	0.59057	0.66232	0.96982	0.75341	0.69554	0.75898	0.78693	0.61516	0.79459	0.77792	0.73144	0.92052	0.76221	0.56511	0.99502	0.56406	0.70005	0.9417	0.76995	0.55921	1.0179	0.73632	0.63108	0.91059	0.98853	0.68423	0.64951	1.2367	0.63552
0.82458	0.80878	1.0133	0.6142	0.76989	0.7538	0.34568	0.75651	1.2361	0.67373	0.63913	1.0095	0.63515	0.7282	1.0475	0.85538	0.65641	1.1157	0.68685	0.67042	0.92379	0.65931	0.67625	1.1106	0.80938	0.81419	0.89161	0.70979	0.66336	0.88984	0.67925	0.74274	1.1053	0.68851	0.53443	1.1779	0.63507	0.72471	1.1832	0.79025	0.62161	1.2319	0.68436	0.67604	1.0516	1.1051	0.90485	0.61941	1.591	0.61415
NaN	NaN	NaN	NaN	NaN	NaN	NaN	NaN	NaN	NaN	NaN	NaN	NaN	NaN	NaN	NaN	NaN	NaN	NaN	NaN	NaN	NaN	NaN	NaN	NaN	NaN	NaN	NaN	NaN	NaN	NaN	NaN	NaN	NaN	NaN	NaN	NaN	NaN	NaN	NaN	NaN	NaN	NaN	NaN	NaN	NaN	NaN	NaN	NaN	NaN
0.89359	0.72887	0.9906	0.62212	0.71899	1.0246	0.37353	0.63035	0.87876	0.68817	0.62155	0.73503	0.59427	0.66332	0.85886	0.8348	0.63804	0.8974	0.74934	0.61792	0.79624	0.62769	0.67507	0.8983	0.74862	0.70397	0.71169	0.6732	0.58704	0.74026	0.73337	0.76912	0.84925	0.70733	0.56273	0.8865	0.57108	0.65284	0.85749	0.66076	0.51237	0.92176	0.62426	0.5574	0.84162	0.87533	0.65689	0.53653	1.1811	0.57005
0.75084	NaN	0.76062	0.50821	NaN	NaN	NaN	NaN	NaN	NaN	NaN	NaN	0.63014	NaN	0.93392	NaN	NaN	0.81099	0.9408	NaN	NaN	NaN	NaN	1.0287	0.71853	NaN	0.67559	0.42019	NaN	0.71072	NaN	0.40545	0.74868	NaN	NaN	0.82768	NaN	0.5488	NaN	NaN	NaN	1.0735	NaN	NaN	0.81902	NaN	NaN	NaN	NaN	NaN
0.87658	0.7696	0.97645	0.64093	0.7065	1.0707	0.41563	0.62209	0.81822	0.66872	0.6192	0.96457	0.68827	0.63579	0.96836	0.80365	0.6483	1.0108	0.67298	0.59927	0.80494	0.58445	0.70904	1.0793	0.77446	0.62917	0.88232	0.74652	0.63205	0.91017	0.69791	0.76376	0.95406	0.75577	0.59259	0.92571	0.56424	0.7403	1.0075	0.7801	0.58399	1.1321	0.72075	0.60877	0.97925	0.96802	0.74619	0.66519	1.3584	0.70941
NaN	NaN	NaN	NaN	NaN	NaN	NaN	NaN	NaN	NaN	NaN	NaN	NaN	NaN	NaN	NaN	NaN	NaN	NaN	NaN	NaN	NaN	NaN	NaN	NaN	NaN	NaN	NaN	NaN	NaN	NaN	NaN	NaN	NaN	NaN	NaN	NaN	NaN	NaN	NaN	NaN	NaN	NaN	NaN	NaN	NaN	NaN	NaN	NaN	NaN
0.83066	0.74872	0.99597	0.79361	0.50128	1.0058	0.29812	0.3795	0.87461	1.1104	0.45159	0.79187	0.57721	0.48023	0.89765	0.78959	0.52328	0.85683	0.66777	0.77654	0.82002	1.3469	0.50981	0.96475	0.58715	0.42785	0.75812	0.72054	0.51764	0.74151	0.70544	0.55681	0.89378	0.80934	0.48545	0.93339	0.85414	0.52824	0.84183	0.74643	0.43866	0.96888	0.73337	0.56287	0.86923	0.6917	0.71282	0.50846	1.2304	0.53929
NaN	NaN	NaN	NaN	NaN	NaN	NaN	NaN	NaN	NaN	NaN	NaN	NaN	NaN	NaN	NaN	NaN	NaN	NaN	NaN	NaN	NaN	NaN	NaN	NaN	NaN	NaN	NaN	NaN	NaN	NaN	NaN	NaN	NaN	NaN	NaN	NaN	NaN	NaN	NaN	NaN	NaN	NaN	NaN	NaN	NaN	NaN	NaN	NaN	NaN
0.9249	0.785	0.97823	0.616	0.78812	1.1705	0.3991	0.64902	0.86598	0.66313	0.68199	0.84798	0.62187	0.78984	0.92256	0.82649	0.75702	0.92798	0.69382	0.67816	0.92412	0.69208	0.85824	1.0452	0.71078	0.76773	0.93658	0.77431	0.66655	0.8456	0.7638	0.87254	0.90627	0.76259	0.79608	1.0019	0.62307	0.84777	1.0187	0.82385	0.74323	1.0457	0.8198	1.0363	0.95374	1.113	0.67071	0.97461	1.4204	0.88939
0.87831	0.65171	1.1111	0.61861	0.70713	1.2698	0.37868	0.6745	0.87212	0.53808	0.6022	0.93159	0.57859	0.66019	0.97015	0.89525	0.62315	1.0746	0.69013	0.55581	0.87727	0.65967	0.69419	0.9691	0.80821	0.80983	0.84363	0.70497	0.54568	0.85295	0.79523	0.76679	1.0087	0.73664	0.66298	1.0621	0.64934	0.75035	0.98832	0.79947	0.74837	1.1225	0.81039	0.72645	0.91819	0.97715	0.7664	0.7647	1.412	0.68161
0.79718	0.73039	0.93544	0.65969	0.93343	1.1712	0.43833	0.82036	0.70791	0.60392	0.75501	0.88017	0.62274	0.69739	1.0386	0.80674	0.69057	1.4963	0.7538	0.63586	0.85938	0.61902	0.65337	NaN	0.7084	0.72453	NaN	0.65424	0.68613	0.94899	0.76162	0.7573	0.96086	0.72108	0.60344	1.2951	0.68348	0.65836	1.4523	0.78414	0.51686	NaN	0.75094	0.70527	1.0021	0.90948	NaN	0.64777	1.5305	0.62681
0.86886	0.75324	1.0646	0.75951	0.66131	1.18	0.34999	0.62105	0.91102	0.77395	0.61338	0.75446	0.65323	0.58938	0.98341	0.82347	0.61846	0.8554	0.8114	0.64418	0.82554	0.69966	0.70995	1.0153	0.78285	0.64062	0.87241	0.7331	0.72991	0.82058	0.84017	0.72767	1.0672	0.92931	0.59495	0.99526	0.71364	0.83238	0.91607	0.78927	0.586	1.099	0.84706	0.70441	1.0046	1.09	0.72156	0.75651	1.2209	0.6806
0.9132	0.96832	0.99831	0.76247	0.78254	1.166	0.42481	0.75902	0.87725	0.77423	0.76941	0.83197	0.69503	0.85872	0.89337	0.94748	0.67661	0.87134	0.8183	0.70151	0.89205	0.61672	0.79364	0.95406	0.81517	0.81664	0.77202	0.79792	0.70195	0.74954	0.87658	0.8135	0.91663	0.8155	0.69434	0.89641	0.65086	0.72193	0.93989	0.82262	0.64702	1.0181	0.76111	0.68174	0.90583	0.99933	0.71075	0.68303	1.321	0.71896
NaN	NaN	NaN	NaN	NaN	NaN	NaN	NaN	NaN	NaN	NaN	NaN	NaN	NaN	NaN	NaN	NaN	NaN	NaN	NaN	NaN	NaN	NaN	NaN	NaN	NaN	NaN	NaN	NaN	NaN	NaN	NaN	NaN	NaN	NaN	NaN	NaN	NaN	NaN	NaN	NaN	NaN	NaN	NaN	NaN	NaN	NaN	NaN	NaN	NaN
1.0529	1.033	1.0734	0.65923	0.61336	1.3892	0.34587	0.60832	0.79273	0.88261	0.71367	0.93167	0.71176	0.60563	0.8536	0.93128	0.56261	1.0094	0.65083	0.64307	0.77469	0.76117	0.66408	1.0155	0.73328	0.62145	0.84748	0.7678	0.5717	0.80578	0.75264	0.7493	0.94288	0.91124	0.6361	1.0178	0.80904	0.61684	0.99343	0.83574	0.46815	1.0292	0.75989	0.75554	0.93981	0.98089	0.71087	0.58111	1.2991	0.62787
NaN	1.0701	NaN	NaN	NaN	NaN	NaN	NaN	NaN	NaN	NaN	NaN	NaN	NaN	NaN	NaN	NaN	NaN	NaN	NaN	NaN	NaN	NaN	NaN	NaN	NaN	NaN	NaN	NaN	NaN	NaN	NaN	NaN	NaN	NaN	NaN	NaN	NaN	NaN	NaN	NaN	NaN	NaN	NaN	NaN	NaN	NaN	NaN	NaN	NaN
0.95078	1.0279	NaN	NaN	NaN	NaN	0.51278	NaN	NaN	0.77081	0.58941	NaN	NaN	0.73016	NaN	0.81615	0.56875	NaN	0.73181	NaN	NaN	NaN	0.5947	NaN	NaN	NaN	NaN	NaN	NaN	NaN	0.91407	NaN	0.9361	0.79643	NaN	NaN	NaN	NaN	NaN	0.60061	0.69479	NaN	NaN	NaN	NaN	NaN	NaN	NaN	NaN	NaN
0.83611	NaN	NaN	NaN	NaN	1.6619	NaN	0.9704	NaN	1.0728	NaN	NaN	NaN	NaN	NaN	NaN	0.82035	NaN	1.148	0.72193	NaN	0.81083	NaN	NaN	NaN	NaN	NaN	NaN	NaN	NaN	0.83932	0.7213	NaN	NaN	NaN	NaN	NaN	0.73824	NaN	NaN	NaN	NaN	NaN	NaN	NaN	1.026	NaN	NaN	NaN	NaN
1.0276	0.81063	0.90946	NaN	NaN	NaN	NaN	NaN	NaN	0.70811	NaN	0.6869	0.59059	0.76237	0.88771	0.92391	NaN	NaN	0.83707	NaN	NaN	NaN	0.61982	NaN	0.84076	0.71404	NaN	0.92733	NaN	NaN	0.89066	NaN	0.89892	NaN	0.65078	NaN	NaN	NaN	NaN	0.68552	0.66382	NaN	0.77973	NaN	NaN	NaN	NaN	NaN	NaN	0.63931
1.2588	NaN	NaN	NaN	NaN	NaN	NaN	NaN	NaN	NaN	NaN	NaN	NaN	NaN	NaN	NaN	NaN	NaN	NaN	NaN	NaN	NaN	NaN	NaN	NaN	NaN	NaN	NaN	NaN	NaN	NaN	NaN	NaN	NaN	NaN	NaN	NaN	NaN	NaN	NaN	NaN	NaN	NaN	NaN	NaN	NaN	NaN	NaN	NaN	NaN
0.875	0.70433	0.97373	0.61779	0.70463	1.1122	0.37935	0.69272	0.88277	0.72634	0.66153	0.79135	0.63258	0.71683	0.89009	0.89573	0.65009	1.0855	0.74744	0.61319	0.83166	0.58494	0.71767	1.0863	0.79223	0.77479	0.80209	0.73548	0.61399	0.96109	0.8606	0.75453	0.9162	0.83169	0.7309	0.97366	0.65702	0.77888	0.86522	0.82134	0.67889	1.0204	0.81876	0.7415	1.1161	1.1066	0.67217	0.7838	1.5536	0.79719
0.83627	0.73043	0.97104	0.63707	0.66175	1.0167	0.35529	0.63108	1.0649	0.64439	0.63661	0.82186	0.65956	0.6381	0.88145	0.90154	0.64652	0.86411	0.64922	0.59149	0.89029	0.55004	0.68991	0.91481	0.82691	0.70675	0.76182	0.76116	0.64905	0.76862	0.95421	0.77206	0.84521	0.90035	0.66157	0.90711	0.72719	0.72487	0.92913	0.79655	0.6141	0.93855	0.74007	0.81304	0.93066	1.1516	0.69863	0.68069	1.2562	0.72639
0.81147	NaN	1.254	0.56728	0.67296	2.0308	0.35056	0.4475	NaN	0.68319	NaN	NaN	0.51652	NaN	NaN	0.69909	0.39873	1.247	0.73036	NaN	NaN	NaN	0.79686	1.0207	0.68432	0.43225	0.96113	0.51328	NaN	0.92814	NaN	NaN	NaN	0.66555	0.76486	NaN	0.72084	0.53782	1.2107	0.66132	0.67006	1.2461	NaN	0.88116	NaN	NaN	NaN	0.77067	NaN	0.87249
NaN	NaN	NaN	NaN	NaN	NaN	NaN	NaN	NaN	NaN	NaN	NaN	NaN	NaN	NaN	NaN	NaN	NaN	NaN	NaN	NaN	NaN	NaN	NaN	NaN	0.71724	NaN	NaN	NaN	NaN	NaN	NaN	NaN	NaN	NaN	NaN	NaN	NaN	NaN	NaN	NaN	NaN	NaN	NaN	NaN	NaN	NaN	NaN	NaN	NaN
0.85795	0.67389	NaN	0.54803	0.63801	NaN	NaN	0.65251	NaN	0.64766	NaN	NaN	0.66967	0.57363	NaN	0.75847	0.63727	NaN	0.66934	NaN	NaN	NaN	NaN	NaN	0.77939	NaN	NaN	0.66098	0.63541	NaN	0.75266	0.78909	NaN	0.60728	0.66447	NaN	0.55884	0.69326	NaN	0.76278	0.64082	NaN	0.48241	0.71698	NaN	0.87679	NaN	0.63753	NaN	0.59654
NaN	NaN	NaN	NaN	NaN	NaN	NaN	NaN	NaN	NaN	NaN	NaN	NaN	NaN	NaN	NaN	NaN	NaN	NaN	NaN	NaN	NaN	NaN	NaN	NaN	NaN	NaN	NaN	NaN	NaN	NaN	NaN	NaN	NaN	NaN	NaN	NaN	NaN	NaN	NaN	NaN	NaN	NaN	NaN	NaN	NaN	NaN	NaN	NaN	NaN
NaN	NaN	NaN	NaN	NaN	NaN	NaN	NaN	NaN	NaN	NaN	NaN	NaN	NaN	NaN	NaN	NaN	NaN	NaN	NaN	NaN	NaN	NaN	NaN	NaN	NaN	NaN	NaN	NaN	NaN	NaN	NaN	NaN	NaN	NaN	NaN	NaN	NaN	NaN	NaN	NaN	NaN	NaN	NaN	NaN	NaN	NaN	NaN	NaN	NaN
NaN	NaN	NaN	NaN	NaN	NaN	NaN	NaN	NaN	NaN	NaN	NaN	NaN	NaN	NaN	NaN	NaN	NaN	NaN	NaN	NaN	NaN	NaN	NaN	NaN	NaN	NaN	NaN	NaN	NaN	NaN	NaN	NaN	NaN	NaN	NaN	NaN	NaN	NaN	NaN	NaN	NaN	NaN	NaN	NaN	NaN	NaN	NaN	NaN	NaN
0.97934	0.98377	NaN	NaN	0.71973	NaN	0.3543	0.56931	NaN	0.74421	0.6395	NaN	0.83073	0.75745	NaN	0.70332	0.62577	NaN	0.65661	0.59919	NaN	0.64167	0.80764	1.086	0.80486	0.6739	1.0607	0.59204	0.57605	NaN	0.67269	0.80152	NaN	0.76167	0.59377	1.0592	NaN	0.59573	1.053	0.87917	NaN	NaN	0.66936	0.8095	0.83034	0.94058	NaN	NaN	0.99044	0.58124
0.87716	0.91241	0.9577	0.79186	0.87594	1.1532	0.36728	0.77196	0.78967	1.0389	0.67055	0.81261	0.70574	0.69744	0.95379	0.87301	0.55111	0.96123	0.84247	0.60061	0.80321	0.87893	0.70852	1.0232	0.82394	0.70173	0.74483	0.76007	0.52146	0.69999	0.83162	0.67924	0.82411	0.85233	0.49275	0.90597	0.82799	0.57652	0.89823	0.87448	0.56471	0.9818	0.77086	0.73283	0.85763	0.96942	0.64862	0.60939	1.2297	0.68816
0.86275	0.7266	1.3362	0.78931	NaN	NaN	NaN	NaN	NaN	0.71568	0.52002	0.9607	0.57439	0.59991	1.0819	NaN	0.85847	1.2931	0.63846	0.58851	0.79152	0.98062	0.54493	1.3189	0.56053	0.49072	0.7185	0.83442	0.51544	0.62496	NaN	0.45726	0.99688	0.73712	0.62942	NaN	0.84487	NaN	0.84737	0.62651	0.36664	0.99775	0.69252	0.73942	0.73877	0.97158	NaN	1.1735	NaN	0.56549
NaN	NaN	NaN	NaN	NaN	NaN	NaN	NaN	NaN	NaN	NaN	NaN	NaN	NaN	NaN	NaN	NaN	NaN	NaN	NaN	NaN	NaN	NaN	NaN	NaN	NaN	NaN	NaN	NaN	NaN	NaN	NaN	NaN	NaN	NaN	NaN	NaN	NaN	NaN	NaN	NaN	NaN	NaN	NaN	NaN	NaN	NaN	NaN	NaN	NaN
NaN	NaN	NaN	NaN	NaN	NaN	0.35747	NaN	NaN	NaN	NaN	NaN	NaN	NaN	0.86328	NaN	NaN	NaN	NaN	NaN	NaN	NaN	NaN	NaN	NaN	NaN	NaN	0.44867	NaN	NaN	NaN	NaN	NaN	NaN	NaN	NaN	NaN	NaN	NaN	NaN	NaN	NaN	NaN	NaN	NaN	NaN	NaN	NaN	1.2503	NaN
NaN	NaN	NaN	NaN	NaN	NaN	NaN	NaN	NaN	NaN	NaN	NaN	NaN	NaN	NaN	NaN	NaN	NaN	NaN	NaN	NaN	NaN	NaN	NaN	NaN	NaN	NaN	NaN	NaN	NaN	NaN	NaN	NaN	NaN	NaN	NaN	NaN	NaN	NaN	NaN	NaN	NaN	NaN	NaN	NaN	NaN	NaN	NaN	NaN	NaN
NaN	NaN	NaN	NaN	NaN	NaN	NaN	NaN	NaN	NaN	NaN	NaN	NaN	NaN	NaN	NaN	NaN	NaN	NaN	NaN	NaN	0.69407	NaN	NaN	NaN	NaN	NaN	NaN	NaN	NaN	NaN	0.59367	NaN	NaN	NaN	NaN	NaN	NaN	NaN	NaN	NaN	NaN	0.51487	1.8067	NaN	NaN	NaN	NaN	NaN	NaN
NaN	NaN	NaN	NaN	NaN	NaN	NaN	NaN	NaN	NaN	NaN	NaN	NaN	NaN	NaN	NaN	NaN	NaN	NaN	NaN	NaN	NaN	NaN	NaN	NaN	NaN	NaN	NaN	NaN	NaN	NaN	NaN	NaN	NaN	NaN	NaN	NaN	NaN	NaN	NaN	NaN	NaN	NaN	NaN	NaN	NaN	NaN	NaN	NaN	NaN
0.87769	0.75201	0.98367	0.59879	0.71629	1.0496	0.38003	0.62231	0.90492	0.7425	0.65304	0.83509	0.63619	0.64639	0.84742	0.84729	0.57059	0.8434	0.67971	0.62538	0.8643	0.72696	0.64416	0.89409	0.68147	0.6871	0.69283	0.7324	0.59836	0.7189	0.83607	0.74787	0.83672	0.79305	0.59417	1.0364	0.71003	0.64132	0.86936	0.82569	0.59348	0.83248	0.74173	0.69975	0.89067	0.8711	0.65913	0.64518	1.1906	0.77909
0.81418	0.70506	0.90653	0.62239	0.69513	0.96407	0.4774	0.59234	0.82289	0.60184	0.579	0.77291	0.61334	0.64599	0.93625	0.86834	0.63472	0.84804	0.78265	0.59962	0.71513	0.7125	0.66509	0.83437	0.74401	0.64275	0.67297	0.66157	0.56986	0.83414	0.7443	0.65331	0.86313	0.7331	0.63075	0.84334	0.66005	0.62894	0.81395	0.7495	0.64558	0.93038	0.65325	0.62599	0.81255	0.99126	0.6406	0.77468	1.1195	0.66916
0.92826	0.92387	0.99201	0.74482	0.83648	1.1154	0.53059	0.72945	0.96908	0.74008	0.77416	0.81497	0.82508	0.75522	0.93698	0.83718	0.69665	0.94483	0.79337	0.75256	0.86039	0.61536	0.82117	0.96019	0.8142	0.84614	0.82346	0.78477	0.72721	0.80714	0.80461	0.89352	0.88886	0.73736	0.82982	0.97064	0.70906	1.0216	0.96706	0.84387	0.63677	1.0034	0.80236	0.78101	0.91897	1.2946	0.76126	0.75766	1.3202	0.92216
0.91054	0.79417	1.0603	0.67572	0.80047	1.2793	0.43345	0.72344	0.8808	0.67636	0.67309	0.9421	0.64865	0.73417	0.75949	0.82061	0.69073	1.1154	0.72459	0.6638	0.98119	0.60799	0.76278	1.0559	0.81094	0.78197	0.91693	0.74023	0.6723	0.94597	0.77746	0.85208	1.0737	0.76433	0.72732	1.1273	0.66087	0.76863	1.1387	0.83057	0.70217	1.2126	0.7979	0.76311	1.0442	1.1078	0.80186	0.80372	1.5035	0.74283
NaN	NaN	NaN	NaN	NaN	NaN	NaN	NaN	NaN	NaN	NaN	NaN	NaN	NaN	NaN	NaN	NaN	NaN	NaN	NaN	NaN	NaN	NaN	NaN	NaN	NaN	NaN	NaN	NaN	NaN	NaN	NaN	NaN	NaN	NaN	NaN	NaN	NaN	NaN	NaN	NaN	NaN	NaN	NaN	NaN	NaN	NaN	NaN	NaN	NaN
NaN	NaN	NaN	NaN	NaN	NaN	NaN	NaN	NaN	NaN	NaN	NaN	NaN	NaN	NaN	NaN	NaN	NaN	NaN	NaN	NaN	NaN	NaN	NaN	NaN	NaN	NaN	NaN	NaN	NaN	NaN	NaN	NaN	NaN	NaN	NaN	NaN	NaN	NaN	NaN	NaN	NaN	NaN	NaN	NaN	NaN	NaN	NaN	NaN	NaN
NaN	1.1615	NaN	NaN	1.3615	NaN	NaN	NaN	NaN	0.58122	NaN	NaN	NaN	NaN	NaN	NaN	NaN	NaN	NaN	NaN	NaN	NaN	NaN	NaN	NaN	1.2029	NaN	NaN	NaN	NaN	NaN	NaN	NaN	NaN	NaN	NaN	NaN	NaN	NaN	NaN	NaN	NaN	NaN	NaN	NaN	NaN	NaN	NaN	NaN	NaN
NaN	NaN	NaN	NaN	NaN	NaN	NaN	NaN	NaN	NaN	NaN	NaN	NaN	NaN	NaN	NaN	NaN	NaN	NaN	NaN	NaN	NaN	NaN	NaN	NaN	NaN	NaN	NaN	NaN	NaN	NaN	NaN	NaN	NaN	NaN	NaN	NaN	NaN	NaN	NaN	NaN	NaN	NaN	NaN	NaN	NaN	NaN	NaN	NaN	NaN
NaN	NaN	NaN	NaN	NaN	NaN	NaN	NaN	NaN	NaN	NaN	NaN	NaN	NaN	NaN	NaN	NaN	NaN	NaN	NaN	NaN	NaN	NaN	NaN	NaN	NaN	NaN	NaN	NaN	NaN	NaN	NaN	NaN	NaN	NaN	NaN	NaN	NaN	NaN	NaN	NaN	NaN	NaN	NaN	NaN	NaN	NaN	NaN	NaN	NaN
NaN	NaN	NaN	NaN	NaN	NaN	NaN	NaN	NaN	NaN	NaN	NaN	NaN	NaN	NaN	NaN	NaN	NaN	NaN	NaN	NaN	NaN	NaN	NaN	NaN	NaN	NaN	NaN	NaN	NaN	NaN	NaN	NaN	NaN	NaN	NaN	NaN	NaN	NaN	NaN	NaN	NaN	NaN	NaN	NaN	NaN	NaN	NaN	NaN	NaN
NaN	NaN	NaN	NaN	NaN	NaN	NaN	NaN	0.89887	NaN	NaN	NaN	NaN	NaN	0.79666	NaN	NaN	NaN	NaN	NaN	NaN	NaN	NaN	NaN	NaN	NaN	NaN	NaN	NaN	NaN	NaN	NaN	NaN	NaN	NaN	NaN	NaN	NaN	NaN	NaN	NaN	NaN	NaN	NaN	NaN	NaN	0.55435	NaN	1.1216	NaN
NaN	NaN	NaN	NaN	NaN	NaN	NaN	NaN	NaN	NaN	NaN	NaN	NaN	NaN	NaN	NaN	NaN	NaN	NaN	NaN	NaN	NaN	NaN	NaN	NaN	NaN	NaN	NaN	NaN	NaN	NaN	NaN	NaN	NaN	NaN	NaN	NaN	NaN	NaN	NaN	NaN	NaN	NaN	NaN	NaN	NaN	NaN	NaN	NaN	NaN
NaN	NaN	NaN	NaN	NaN	NaN	NaN	NaN	NaN	NaN	NaN	NaN	NaN	NaN	NaN	0.89952	NaN	NaN	NaN	NaN	NaN	NaN	NaN	NaN	NaN	NaN	NaN	NaN	NaN	NaN	NaN	NaN	NaN	0.83503	NaN	NaN	NaN	NaN	NaN	NaN	NaN	NaN	NaN	NaN	NaN	NaN	NaN	NaN	NaN	NaN
NaN	NaN	NaN	NaN	NaN	NaN	NaN	NaN	NaN	NaN	NaN	NaN	NaN	NaN	NaN	NaN	NaN	1.3821	NaN	NaN	NaN	NaN	NaN	NaN	NaN	NaN	NaN	NaN	NaN	NaN	NaN	NaN	NaN	NaN	NaN	NaN	NaN	NaN	NaN	NaN	NaN	NaN	NaN	NaN	NaN	NaN	NaN	NaN	NaN	NaN
0.97278	0.90583	0.9554	0.71579	0.85744	1.2047	0.40755	0.77047	1.0397	1.5113	0.80272	0.99876	0.71789	0.81433	1.1671	0.90445	0.7871	1.0843	0.80286	0.72263	0.83651	1.5681	0.82974	1.1763	0.86044	0.79233	1.3402	0.78321	0.79069	0.89425	0.86323	0.97223	0.90817	0.79983	0.76336	1.1721	0.73884	0.85959	1.1557	0.87945	0.75367	1.249	0.87191	0.69489	0.81527	1.2811	0.82145	0.81568	1.4264	0.88114
NaN	NaN	NaN	NaN	NaN	NaN	NaN	NaN	NaN	NaN	NaN	NaN	NaN	NaN	NaN	NaN	NaN	NaN	NaN	NaN	NaN	NaN	NaN	NaN	NaN	NaN	NaN	NaN	NaN	NaN	NaN	NaN	NaN	NaN	NaN	NaN	NaN	NaN	NaN	NaN	NaN	NaN	NaN	NaN	NaN	NaN	NaN	NaN	NaN	NaN
0.903	0.70998	0.92654	0.67259	0.78647	NaN	0.44025	0.64362	0.7397	0.73393	0.7881	NaN	0.71184	0.64302	NaN	0.82121	0.67136	NaN	0.86721	0.59139	NaN	0.70137	0.70982	NaN	0.74796	0.64526	NaN	0.83739	0.68856	0.78968	0.73586	0.75343	NaN	0.74816	0.71742	NaN	0.58631	0.69538	NaN	0.74782	0.78709	NaN	0.80478	0.62735	NaN	0.8666	NaN	0.84792	NaN	0.80458
1.0204	NaN	NaN	0.89397	NaN	NaN	NaN	NaN	NaN	1.0177	NaN	NaN	0.75424	NaN	NaN	0.99434	NaN	NaN	1.0782	NaN	NaN	NaN	NaN	NaN	0.75301	NaN	NaN	0.87975	NaN	NaN	0.80633	NaN	NaN	NaN	NaN	NaN	NaN	NaN	NaN	NaN	NaN	NaN	1.2441	NaN	NaN	NaN	NaN	NaN	NaN	NaN
NaN	NaN	NaN	NaN	NaN	NaN	NaN	NaN	NaN	NaN	NaN	NaN	NaN	NaN	NaN	NaN	NaN	NaN	NaN	NaN	NaN	NaN	NaN	NaN	NaN	NaN	NaN	NaN	NaN	NaN	NaN	NaN	NaN	NaN	NaN	NaN	NaN	NaN	NaN	NaN	NaN	NaN	NaN	NaN	NaN	NaN	NaN	NaN	NaN	NaN
NaN	NaN	NaN	NaN	NaN	NaN	NaN	NaN	NaN	NaN	NaN	NaN	NaN	NaN	NaN	NaN	NaN	NaN	NaN	NaN	NaN	NaN	NaN	NaN	NaN	NaN	NaN	NaN	NaN	NaN	NaN	NaN	NaN	NaN	NaN	NaN	NaN	NaN	NaN	NaN	NaN	NaN	NaN	NaN	NaN	NaN	NaN	NaN	NaN	NaN
NaN	NaN	NaN	NaN	NaN	NaN	NaN	NaN	NaN	NaN	NaN	NaN	NaN	NaN	NaN	NaN	NaN	NaN	NaN	NaN	NaN	NaN	NaN	NaN	NaN	NaN	NaN	NaN	NaN	NaN	NaN	NaN	NaN	NaN	NaN	NaN	NaN	NaN	NaN	NaN	NaN	NaN	NaN	NaN	NaN	NaN	NaN	NaN	NaN	NaN
0.70875	0.71719	0.86648	0.49016	0.65336	NaN	0.30817	0.78712	0.83846	0.88377	0.70006	0.59153	0.74328	0.65143	0.82248	0.71036	0.50822	0.82566	0.56966	0.61331	NaN	0.61776	0.86989	0.86372	0.7303	0.56782	0.71569	0.72693	0.60802	0.85179	0.81994	0.79949	0.85898	0.85678	0.62778	0.89122	0.71322	0.90408	0.75318	0.86114	0.71157	1.0485	0.83108	0.66752	1.0129	0.70087	0.65728	0.8433	1.3925	0.88492
1.0776	NaN	NaN	NaN	NaN	NaN	NaN	NaN	NaN	NaN	NaN	NaN	0.68915	NaN	NaN	NaN	NaN	NaN	NaN	NaN	NaN	NaN	3.1114	NaN	NaN	1.4544	NaN	NaN	NaN	NaN	NaN	NaN	NaN	NaN	NaN	NaN	NaN	NaN	NaN	0.62892	NaN	NaN	0.65805	NaN	NaN	NaN	NaN	NaN	NaN	NaN
NaN	NaN	NaN	NaN	NaN	NaN	NaN	NaN	NaN	NaN	NaN	NaN	NaN	NaN	NaN	NaN	NaN	NaN	NaN	NaN	NaN	NaN	NaN	NaN	NaN	NaN	NaN	NaN	0.53818	NaN	NaN	NaN	NaN	NaN	NaN	NaN	NaN	NaN	NaN	NaN	NaN	NaN	NaN	NaN	NaN	NaN	NaN	NaN	NaN	NaN
NaN	NaN	NaN	NaN	NaN	NaN	NaN	NaN	NaN	NaN	NaN	NaN	NaN	NaN	NaN	NaN	NaN	NaN	NaN	NaN	NaN	NaN	NaN	NaN	NaN	NaN	NaN	NaN	NaN	NaN	NaN	NaN	NaN	NaN	NaN	NaN	NaN	NaN	NaN	NaN	NaN	NaN	NaN	NaN	NaN	NaN	NaN	NaN	NaN	NaN
0.79777	0.70585	NaN	0.45749	0.68407	NaN	NaN	0.75224	NaN	0.49753	0.753	NaN	0.48617	0.50471	NaN	0.79262	NaN	NaN	0.89231	0.63132	NaN	0.51658	0.63067	NaN	0.59873	0.75664	NaN	0.67089	0.61333	NaN	0.85517	NaN	NaN	0.83233	0.78786	NaN	0.64961	0.68688	NaN	0.77924	0.7456	NaN	0.74045	0.34835	NaN	0.91704	NaN	0.72797	NaN	0.26916
NaN	0.92579	NaN	0.83797	0.83223	NaN	NaN	NaN	NaN	0.689	NaN	NaN	0.66498	NaN	NaN	1.138	NaN	NaN	NaN	NaN	NaN	0.66328	0.8817	NaN	NaN	NaN	NaN	NaN	NaN	NaN	0.74805	NaN	NaN	NaN	NaN	NaN	0.62834	NaN	NaN	0.77323	NaN	NaN	NaN	NaN	NaN	NaN	NaN	NaN	NaN	NaN
NaN	NaN	NaN	NaN	NaN	NaN	NaN	NaN	NaN	NaN	NaN	NaN	NaN	NaN	NaN	NaN	NaN	NaN	NaN	NaN	NaN	NaN	NaN	NaN	NaN	NaN	NaN	NaN	NaN	NaN	NaN	NaN	NaN	NaN	NaN	NaN	NaN	NaN	NaN	NaN	NaN	NaN	NaN	NaN	NaN	NaN	NaN	NaN	NaN	NaN
NaN	NaN	NaN	NaN	NaN	NaN	NaN	NaN	NaN	NaN	NaN	NaN	NaN	NaN	NaN	NaN	NaN	NaN	NaN	NaN	NaN	NaN	NaN	NaN	NaN	NaN	NaN	NaN	NaN	NaN	NaN	NaN	NaN	NaN	NaN	NaN	NaN	NaN	NaN	NaN	NaN	NaN	NaN	NaN	NaN	NaN	NaN	NaN	NaN	NaN
NaN	0.72005	NaN	NaN	0.57293	NaN	NaN	NaN	NaN	NaN	NaN	NaN	NaN	NaN	NaN	NaN	NaN	NaN	NaN	0.83915	NaN	NaN	NaN	NaN	NaN	NaN	NaN	NaN	NaN	NaN	NaN	NaN	NaN	NaN	NaN	NaN	0.70491	NaN	NaN	NaN	NaN	NaN	NaN	NaN	NaN	NaN	NaN	NaN	NaN	NaN
0.86929	0.79312	1.0103	0.70359	0.7362	1.0489	0.38486	0.63047	0.95572	0.67726	0.57196	0.8094	0.63972	0.65333	0.99194	0.86276	0.63035	0.99012	0.76031	0.57575	0.79286	0.65004	0.68831	0.95841	0.69384	0.68887	0.79746	0.67603	0.62043	0.82303	0.81602	0.72948	0.95044	0.79154	0.64236	1.0385	0.59937	0.6746	0.881	0.81044	0.64147	1.0764	0.70991	0.70666	0.88555	0.94137	0.70921	0.60301	1.057	0.51826
0.91661	0.70942	0.95007	0.64648	0.69222	1.2156	0.44002	0.76222	0.88513	0.75611	0.68163	0.60152	0.69049	0.81683	0.90075	0.95781	0.70138	0.94659	0.76963	0.58402	0.96579	0.55064	0.64873	0.99924	0.8041	0.91079	0.95618	0.7552	0.55806	0.90496	0.96039	0.78833	0.99356	0.89706	0.28546	1.0355	0.78458	0.77856	0.93054	0.79897	0.33499	1.2352	0.81975	0.36306	1.0944	0.92932	0.7267	0.39101	1.5091	0.3298
0.90254	0.67862	1.0343	0.57445	0.6821	1.1238	0.34654	0.58332	0.80828	0.54776	0.60489	0.79371	0.58606	0.5912	0.90938	0.70047	0.61446	0.98393	0.68736	0.52352	0.94755	0.59618	0.56609	0.94261	0.67535	0.63614	0.8852	0.72561	0.51761	0.79454	0.78447	0.67153	1.0308	0.7663	0.5939	0.99248	0.62418	0.59823	0.9363	0.76958	0.52309	1.0979	0.74299	0.59713	0.95383	0.98279	0.91584	0.80072	1.2812	0.581
0.89883	1.2036	0.75158	0.54707	1.2414	2.1454	0.43709	0.79014	NaN	0.60763	0.87173	NaN	0.61806	0.80827	NaN	0.90481	0.79039	1.0427	NaN	0.88784	0.70643	0.63619	0.89074	0.84664	0.60435	1.1822	0.6873	0.68416	0.99849	NaN	0.96963	1.4067	NaN	NaN	NaN	NaN	0.81943	1.0592	0.91621	0.78315	0.43875	0.76405	0.93235	0.53257	NaN	1.1906	NaN	0.52654	NaN	NaN
0.93246	0.72146	NaN	0.64773	0.663	NaN	NaN	0.50844	NaN	1.0795	NaN	NaN	0.57134	0.67289	NaN	0.84872	0.59767	NaN	0.83717	0.71229	NaN	1.0491	0.84398	NaN	NaN	NaN	NaN	0.79262	NaN	NaN	NaN	0.6094	NaN	0.80121	NaN	NaN	0.90007	NaN	NaN	0.84562	NaN	NaN	0.85999	NaN	NaN	NaN	NaN	NaN	NaN	NaN
0.95597	0.72096	0.97287	0.68915	0.57266	1.1501	0.38417	0.56937	0.94151	0.93256	0.58881	0.98465	0.60652	0.55232	0.88695	0.82517	0.56872	0.97681	0.75154	0.58357	0.78895	0.91208	0.6099	0.98046	0.76194	0.59868	0.78676	0.71236	0.56322	0.83111	0.74708	0.69293	0.98218	0.76726	0.48992	0.97225	0.62978	0.5907	0.91091	0.68137	0.48191	0.97991	0.65741	0.58421	0.82613	0.80768	0.66162	0.51934	1.22	0.61762
0.95403	0.7258	1.09	0.68611	0.50641	1.1552	0.33408	0.58694	1.005	1.1387	0.54878	1.1762	0.59747	0.4887	1.1964	0.87745	0.55848	NaN	0.7571	0.58636	0.96128	1.3966	1.2261	1.4635	0.73947	0.62794	1.1034	0.83959	0.60364	0.92803	0.81454	0.61778	NaN	0.88085	0.51176	NaN	0.80775	0.54252	NaN	0.71881	0.5633	1.1045	0.7813	0.51568	0.86492	0.73846	1.0308	0.60932	1.678	0.58214
0.91482	0.70378	0.96638	0.67839	0.49506	1.2061	0.27001	0.32644	0.94868	1.3994	0.37423	0.99704	0.43119	0.37158	0.88985	0.64863	0.42969	0.96025	0.47253	0.58696	0.88457	1.6644	0.44128	1.0005	0.44413	0.33111	0.80772	0.61142	0.3674	0.77885	0.71112	0.4656	0.96052	0.75986	0.42043	0.89401	0.83717	0.38849	0.94557	0.55925	0.34704	0.96821	0.58091	0.43145	0.81024	0.53803	0.69067	0.3403	1.3581	0.48738
0.78446	0.7338	0.98976	0.53491	0.64376	1.0578	0.39926	0.60331	0.92765	0.71512	0.55604	0.90149	0.58086	0.61978	0.92633	0.73857	0.5967	0.93099	0.68666	0.59238	0.86248	0.63561	0.64917	0.94208	0.75079	0.62808	0.69823	0.67635	0.58655	0.903	0.73755	0.67438	0.90965	0.77917	0.54704	0.96414	0.60606	0.67698	1.0135	0.71831	0.56612	1.2287	0.66188	0.58678	0.83732	0.92377	0.71987	0.62714	1.265	0.57661
0.89821	0.84865	0.76511	0.75728	0.52425	NaN	0.25632	0.5267	NaN	0.89688	0.53671	NaN	0.61204	NaN	NaN	0.69198	0.58373	0.93193	0.50477	0.60878	NaN	1.1955	0.53385	1.2707	0.53185	0.545	1.0209	0.713	NaN	0.72273	0.58175	0.53628	NaN	0.71488	NaN	0.95135	0.65869	0.45406	NaN	0.62484	NaN	1.2279	0.64068	NaN	0.72291	NaN	0.81	NaN	NaN	NaN
0.88885	0.69168	0.96512	0.70367	0.37335	1.2001	0.29275	0.35634	0.84055	1.169	0.47873	0.86414	0.39982	0.42263	0.98181	0.7789	0.47471	0.98154	0.56104	0.51229	0.96662	1.4034	0.47207	0.99759	0.47574	0.4	0.87668	0.66064	0.45575	0.85651	0.5578	0.51352	0.98816	0.75514	0.82867	0.9856	0.73631	0.42729	0.97019	0.73271	0.48169	1.0042	0.65268	0.61501	0.91746	0.57049	0.7544	0.51846	1.4775	0.59557
0.91441	0.81148	0.95337	0.76243	0.4884	1.1412	0.32739	0.42392	0.91468	1.2828	0.55773	0.86615	0.50754	0.48538	0.92911	0.63848	0.44495	0.94343	0.61813	0.60831	0.8866	1.4538	0.49991	1.0597	0.52991	0.62495	0.85174	0.57061	0.41354	0.8286	0.67092	0.64139	0.85485	0.73893	0.54807	0.94813	0.75143	0.48173	0.93873	0.55631	0.45378	0.98	0.58851	0.53183	0.86358	0.70385	0.74948	0.52467	1.3334	0.52206
1.0236	0.98086	1.1885	1.3116	0.74593	1.1142	0.41395	0.46945	1.0807	1.5386	NaN	1.2451	NaN	0.45521	1.1527	0.77331	0.37401	1.326	NaN	0.71482	0.94323	2.2457	0.49559	1.3785	0.60896	0.48154	NaN	0.78918	0.52559	1.3904	0.7529	0.61359	1.2355	1.0932	0.5384	1.7117	1.1624	0.29879	NaN	0.91445	0.51848	1.5519	0.85679	0.52573	1.035	0.75456	1.2388	0.54423	1.3697	0.77405
NaN	NaN	NaN	NaN	NaN	NaN	NaN	NaN	NaN	NaN	NaN	NaN	NaN	NaN	NaN	NaN	NaN	NaN	NaN	NaN	NaN	NaN	NaN	NaN	NaN	NaN	NaN	NaN	NaN	NaN	NaN	NaN	NaN	NaN	NaN	NaN	NaN	NaN	NaN	NaN	NaN	NaN	NaN	NaN	NaN	NaN	NaN	NaN	NaN	NaN
NaN	NaN	NaN	NaN	NaN	NaN	NaN	NaN	NaN	NaN	NaN	NaN	NaN	NaN	NaN	NaN	NaN	NaN	NaN	NaN	NaN	NaN	NaN	NaN	NaN	NaN	NaN	NaN	NaN	NaN	NaN	NaN	NaN	NaN	NaN	NaN	NaN	NaN	NaN	NaN	NaN	NaN	NaN	NaN	NaN	NaN	NaN	NaN	NaN	NaN
0.84922	0.72465	0.98599	0.58845	0.67886	1.2695	0.37335	0.57663	0.90454	0.69495	0.57906	0.77318	0.62083	0.61883	1.0089	0.89616	0.59243	0.93859	0.68382	0.5459	0.82813	0.54061	0.62871	0.9665	0.70032	0.65994	0.67793	0.66618	0.55528	0.76753	0.7704	0.65898	0.88764	0.76505	0.58768	0.82074	0.55071	0.65498	0.88943	0.73019	0.77596	1.0267	0.78169	0.61734	0.85275	0.96256	0.7427	0.67445	1.1955	0.71994
0.84044	0.69209	1.1392	0.63816	0.69496	1.0448	0.34705	0.62669	0.64178	0.62883	0.698	0.99914	0.63645	0.68068	0.95272	0.89554	0.65505	1.219	0.76535	0.58704	0.89503	0.59193	0.75565	1.1229	0.77296	0.66152	0.92098	0.78768	0.63316	1.0476	0.75575	0.71489	0.98788	0.7678	0.61399	1.0728	0.73302	0.73032	0.84601	0.79577	0.64834	1.0467	0.76607	0.57871	0.9638	0.8624	0.69565	0.63945	1.4934	0.70025
NaN	NaN	0.98436	NaN	NaN	1.039	NaN	NaN	0.90004	NaN	NaN	NaN	NaN	NaN	0.8651	NaN	NaN	NaN	NaN	NaN	0.84507	NaN	NaN	NaN	NaN	NaN	NaN	NaN	NaN	0.84677	NaN	NaN	0.89353	NaN	NaN	NaN	NaN	NaN	NaN	NaN	NaN	NaN	NaN	NaN	0.94826	NaN	NaN	NaN	NaN	NaN
0.94277	0.76516	0.81038	0.62241	0.60336	1.1242	0.42215	0.64027	0.84227	0.71211	0.62905	1.0292	0.65874	0.61609	0.70779	0.89252	0.60419	0.99323	0.66236	0.56203	0.95623	0.66077	0.68133	0.84464	0.74515	0.70891	0.63808	0.72356	0.5488	0.86781	0.74798	0.6861	0.94799	0.76794	0.49486	0.77959	0.66698	0.61309	1.188	0.82297	0.47941	0.99688	0.76574	0.55743	0.87316	0.9386	0.70644	0.56249	1.0636	0.55289
NaN	NaN	NaN	NaN	0.68663	NaN	NaN	NaN	NaN	NaN	NaN	NaN	NaN	0.66757	NaN	NaN	0.69199	NaN	NaN	NaN	NaN	NaN	NaN	NaN	NaN	0.74786	NaN	NaN	NaN	NaN	NaN	NaN	NaN	NaN	NaN	NaN	NaN	NaN	NaN	NaN	NaN	NaN	NaN	NaN	NaN	1.0357	NaN	NaN	NaN	NaN
0.86609	0.73202	0.91524	0.6087	0.72935	1.0255	0.35362	0.62261	0.95206	0.63316	0.63137	0.81913	0.63412	0.69199	0.99016	0.82132	0.63752	0.96052	0.6466	0.58682	0.86264	0.57866	0.69978	0.97234	0.72554	0.73093	0.72584	0.72907	0.61213	0.94925	0.71484	0.8044	0.95369	0.73843	0.64165	0.85062	0.61321	0.68884	0.83969	0.76894	0.69828	1.0546	0.70917	0.75165	1.0487	1.0247	0.71257	0.75541	1.6311	0.6856
0.84433	0.6062	NaN	0.64073	0.70502	0.84859	0.43402	0.8478	0.75675	0.60934	0.66601	0.74122	0.55897	0.7546	0.98637	0.68733	0.85183	0.80725	0.63584	0.66724	NaN	0.50075	0.74713	0.97761	0.7126	0.73765	0.81353	0.72606	0.66987	0.8994	0.74696	0.77243	0.99271	0.78406	0.68351	0.9978	0.5868	0.82109	0.88743	0.80854	0.58273	1.2513	0.71776	0.64699	0.91042	0.96312	0.71483	0.75218	1.3546	0.59612
0.89231	0.74084	0.94078	0.62714	0.69734	0.99389	0.33567	0.6427	0.96065	0.66958	0.60723	0.79711	0.64181	0.56364	0.84851	0.87491	0.74968	0.82999	0.76053	0.58726	0.77589	0.58963	0.61507	0.80514	0.69648	0.77047	0.70362	0.63174	0.63863	0.77206	0.66213	0.68628	0.82438	0.72411	0.6838	0.73587	0.56969	0.75325	0.8407	0.71133	0.87069	0.90935	0.68965	0.7541	0.80679	1.004	0.65339	0.74655	1.3177	0.74945
0.90777	0.84367	0.90585	0.63575	0.73683	0.9687	0.36165	0.60115	0.81087	0.70094	0.5878	0.96189	0.58179	0.64857	0.87668	0.98862	0.59039	0.86067	0.67733	0.58289	0.69981	0.62931	0.68962	0.99034	0.64028	0.70848	0.86364	0.64994	0.52187	0.92139	0.72508	0.77522	1.0705	0.73048	0.53775	0.74886	0.54944	0.68455	0.7857	0.78617	0.59896	1.0374	0.69421	0.89218	0.79497	1.0335	0.69583	0.60396	1.3102	0.69388
NaN	0.69129	NaN	NaN	0.67766	NaN	NaN	NaN	NaN	NaN	0.73127	NaN	NaN	0.50529	NaN	NaN	0.70852	1.0592	0.79474	0.4965	1.2591	0.82899	0.7594	1.1472	0.78196	NaN	0.88375	NaN	NaN	0.93407	NaN	NaN	1.0735	NaN	0.5534	0.90842	0.87875	NaN	0.91525	1.2193	0.63908	NaN	NaN	0.54089	NaN	0.97666	NaN	0.58198	1.3901	NaN
0.97533	0.64377	1.1126	0.61687	0.97721	1.2922	0.41276	0.60108	0.77196	0.6046	0.62791	0.88061	0.58382	0.58092	0.89331	0.80054	0.52729	1.0899	0.66532	0.63479	0.83318	0.65466	0.68392	1.0181	0.82059	0.65208	0.88145	0.67673	0.65455	0.80674	0.80181	0.81328	0.92445	0.70597	0.67623	0.99033	0.60453	0.77495	0.9451	0.66368	0.54268	1.1809	0.71274	0.71427	0.93845	1.1382	0.7894	0.52807	1.3228	0.70327
0.78254	0.68799	1.1066	0.43444	0.67368	1.5515	0.35439	0.54904	0.77421	0.73565	0.55557	NaN	0.89397	0.6387	0.99041	0.75489	0.57672	1.0819	0.5792	0.65126	0.68531	0.61369	0.64913	1.2885	0.70217	0.6551	1.0528	0.8023	0.65683	0.85866	0.64591	0.70582	0.85561	0.78812	0.52671	1.0275	0.6146	0.75584	0.9146	0.67271	0.55331	1.0125	0.81615	0.64768	0.88325	0.97657	0.81016	0.6242	1.1219	0.62936
0.86898	0.75189	1.0028	0.60503	0.81915	1.164	0.39227	0.66257	0.88064	0.6777	0.62333	0.86045	0.56853	0.62245	0.93366	0.83874	0.63515	1.0027	0.678	0.59409	0.94826	0.65166	0.72299	1.0707	0.73221	0.71524	0.79653	0.74509	0.59344	0.79896	0.83108	0.78695	1.0112	0.73807	0.52405	1.0921	0.59738	0.7959	0.97706	0.77451	0.58536	1.1131	0.73613	0.73125	0.95945	0.98528	0.67812	0.7203	1.4199	0.75757
0.81389	0.85251	1.0762	0.60804	0.70583	NaN	NaN	0.65535	NaN	0.72564	0.59758	NaN	0.52043	0.6818	1.1551	0.83756	0.68706	NaN	NaN	0.57837	NaN	NaN	0.63728	NaN	NaN	0.68057	NaN	0.85545	0.5978	NaN	0.75044	0.72363	NaN	0.79426	0.45671	1.2588	0.59281	0.70267	1.1282	0.86621	0.42668	1.3875	0.60279	0.62024	1.1713	0.96269	NaN	0.62433	NaN	0.60852
0.80557	NaN	NaN	NaN	NaN	NaN	NaN	NaN	NaN	NaN	0.63346	NaN	0.46464	NaN	NaN	0.69839	NaN	NaN	NaN	NaN	NaN	NaN	0.68691	NaN	0.7003	NaN	NaN	NaN	NaN	NaN	NaN	NaN	NaN	NaN	NaN	NaN	NaN	NaN	NaN	NaN	NaN	NaN	0.53902	NaN	NaN	NaN	NaN	NaN	NaN	NaN
NaN	NaN	NaN	NaN	NaN	NaN	NaN	NaN	NaN	NaN	NaN	NaN	NaN	NaN	NaN	NaN	NaN	NaN	NaN	NaN	NaN	NaN	NaN	NaN	NaN	NaN	NaN	NaN	NaN	NaN	NaN	NaN	NaN	NaN	NaN	NaN	NaN	NaN	NaN	NaN	NaN	NaN	NaN	NaN	NaN	NaN	NaN	NaN	NaN	NaN
0.94001	0.69488	1.023	0.5807	0.70272	1.0421	0.33586	0.638	0.83788	0.58957	0.59024	0.79477	0.65482	0.64529	1.0175	0.88506	0.58953	1.0564	0.65397	0.56731	0.82417	0.55447	0.69721	1.0439	0.71103	0.70685	0.9795	0.71371	0.58419	0.84264	0.77922	0.80707	0.88793	0.8031	0.59729	1.1135	0.66009	0.76287	1.0523	0.77495	0.64087	1.1914	0.78947	0.66933	1.0499	1.0654	0.81799	0.63192	1.5584	0.74801
0.93347	0.7751	0.99776	0.62601	0.69648	1.122	0.39275	0.6063	0.90693	0.69299	0.63499	0.79204	0.64951	0.60699	0.88987	0.88532	0.65155	0.97389	0.6822	0.5822	0.87821	0.57721	0.65209	0.96434	0.7981	0.68653	0.75001	0.67941	0.59431	0.7646	0.80053	0.74391	0.96995	0.79665	0.56274	1.0165	0.61433	0.73045	1.0054	0.77685	0.57672	1.0668	0.77127	0.67286	0.9522	0.97142	0.79783	0.66761	1.3931	0.63296
0.96859	0.67811	0.99922	0.64375	0.70036	1.0886	0.32442	0.65071	0.92537	0.77389	0.66052	0.90212	0.64181	0.71018	0.98585	0.81226	0.66059	1.1923	0.78805	0.64734	0.88747	0.64064	0.75604	1.1151	0.84617	0.80239	0.90718	0.72967	0.69831	0.84236	0.7876	0.8488	0.9962	0.76046	0.66893	1.0471	0.65191	0.72973	1.0248	0.82312	0.66407	1.0136	0.77857	0.7471	0.99179	1.099	0.73808	0.67843	1.542	0.69487
NaN	NaN	NaN	NaN	NaN	NaN	NaN	NaN	0.78264	NaN	NaN	NaN	NaN	NaN	NaN	NaN	NaN	0.88159	NaN	NaN	NaN	NaN	NaN	NaN	NaN	NaN	NaN	0.6504	NaN	0.62026	NaN	NaN	NaN	NaN	NaN	1.2571	NaN	NaN	NaN	0.77482	NaN	NaN	0.77544	NaN	NaN	NaN	NaN	NaN	NaN	NaN
NaN	NaN	NaN	NaN	NaN	NaN	NaN	NaN	NaN	NaN	NaN	NaN	NaN	NaN	NaN	NaN	NaN	NaN	NaN	NaN	NaN	NaN	NaN	NaN	NaN	NaN	NaN	NaN	NaN	NaN	NaN	NaN	NaN	NaN	NaN	NaN	NaN	NaN	NaN	NaN	NaN	NaN	NaN	NaN	NaN	NaN	NaN	NaN	NaN	NaN
NaN	NaN	NaN	NaN	0.55433	1.4686	NaN	NaN	0.9111	1.9853	NaN	NaN	0.92529	NaN	NaN	NaN	NaN	0.87456	1.0668	0.77021	NaN	NaN	NaN	0.92665	0.9771	NaN	0.7421	NaN	NaN	0.67947	1.0693	NaN	NaN	0.90394	0.61298	0.83441	0.63845	NaN	0.86317	NaN	NaN	1.0351	0.63512	0.50694	0.6839	NaN	0.64304	0.49752	1.2418	0.53064
0.82699	0.83485	0.97747	0.60573	0.70931	0.97097	0.32505	0.61146	0.88876	0.69697	0.64363	0.74955	0.58193	0.73596	0.99323	0.70684	0.6424	0.93835	0.70137	0.57708	0.82821	0.61571	0.64671	0.87436	0.76775	0.57871	0.79361	0.65201	0.58244	0.75837	0.7169	0.67036	0.89807	0.67247	0.49082	0.97791	0.59115	0.71128	0.94215	0.66083	0.63704	1.0417	0.67139	0.55712	0.88402	1.0293	0.69925	0.63847	1.3102	0.72457
NaN	0.78713	NaN	NaN	NaN	NaN	NaN	NaN	NaN	NaN	0.61966	NaN	0.71424	0.7623	NaN	0.99393	0.5971	NaN	NaN	0.60659	NaN	NaN	0.64449	NaN	NaN	0.76884	NaN	NaN	0.65418	NaN	0.85914	0.7465	NaN	0.97291	0.67531	NaN	NaN	0.59384	NaN	NaN	0.66479	NaN	NaN	0.64357	NaN	0.89024	NaN	NaN	NaN	0.70022
NaN	0.70281	NaN	NaN	NaN	NaN	0.33747	NaN	NaN	NaN	0.65597	NaN	NaN	NaN	NaN	NaN	0.57521	NaN	NaN	0.59992	NaN	NaN	0.62388	NaN	0.57582	0.55566	NaN	NaN	0.51497	NaN	NaN	0.63933	NaN	0.54094	NaN	NaN	NaN	0.55108	NaN	0.51885	0.41538	NaN	NaN	NaN	NaN	NaN	NaN	NaN	NaN	0.40661
NaN	NaN	NaN	NaN	NaN	NaN	NaN	NaN	NaN	NaN	NaN	NaN	NaN	NaN	NaN	NaN	NaN	NaN	NaN	NaN	NaN	NaN	NaN	NaN	NaN	NaN	NaN	NaN	NaN	NaN	NaN	NaN	NaN	NaN	NaN	NaN	NaN	NaN	NaN	NaN	NaN	NaN	NaN	NaN	NaN	NaN	NaN	NaN	NaN	NaN
NaN	NaN	NaN	NaN	NaN	NaN	NaN	NaN	NaN	NaN	NaN	NaN	NaN	NaN	NaN	NaN	NaN	NaN	NaN	NaN	NaN	NaN	NaN	NaN	NaN	NaN	NaN	NaN	NaN	NaN	NaN	NaN	NaN	NaN	NaN	NaN	NaN	NaN	NaN	NaN	NaN	NaN	NaN	NaN	NaN	NaN	NaN	NaN	NaN	NaN
NaN	NaN	NaN	NaN	NaN	NaN	NaN	NaN	NaN	NaN	NaN	NaN	NaN	NaN	NaN	NaN	NaN	NaN	NaN	NaN	NaN	NaN	NaN	NaN	NaN	NaN	NaN	NaN	NaN	NaN	NaN	NaN	NaN	NaN	NaN	NaN	NaN	NaN	NaN	NaN	NaN	NaN	NaN	NaN	NaN	NaN	NaN	NaN	NaN	NaN
0.88293	NaN	0.74389	0.80876	0.80701	NaN	0.39629	0.84719	NaN	0.71851	1.0595	NaN	0.70042	1.0155	0.87072	0.81615	0.87118	NaN	0.74702	0.70476	NaN	0.65332	0.79581	NaN	0.80614	0.81756	0.86873	0.80094	NaN	0.74462	0.7255	0.80636	0.76119	0.75841	0.76533	1.0129	0.56247	1.0254	1.0985	0.89957	0.6831	0.94982	0.7274	0.87254	0.94131	1.2859	NaN	0.78818	NaN	0.80531
0.84714	0.72562	0.99146	0.57071	0.71354	NaN	0.30371	0.67242	1.1776	0.64771	0.61966	0.90662	0.61262	0.61111	0.9329	0.7654	0.61894	1.0372	0.64659	0.60416	NaN	0.58136	0.70301	1.2155	0.79033	0.69542	0.89143	0.68755	0.57999	0.88696	0.75182	0.71242	0.80566	0.689	0.5278	1.1533	0.61032	0.71003	1.0046	0.70331	0.53632	0.9659	0.71695	0.65231	0.94083	0.96392	NaN	0.6287	1.3239	0.67461
NaN	NaN	NaN	NaN	NaN	NaN	NaN	NaN	NaN	NaN	NaN	NaN	NaN	NaN	NaN	NaN	NaN	NaN	NaN	NaN	NaN	NaN	NaN	NaN	NaN	NaN	NaN	NaN	NaN	NaN	NaN	NaN	NaN	NaN	NaN	NaN	NaN	NaN	NaN	NaN	NaN	NaN	NaN	NaN	NaN	NaN	NaN	NaN	NaN	NaN
0.74557	NaN	NaN	0.56593	NaN	NaN	NaN	0.8185	NaN	NaN	0.9769	NaN	0.65305	0.85032	NaN	NaN	1.0045	NaN	0.66221	0.62537	NaN	0.60993	0.42721	NaN	0.71604	0.78545	NaN	0.78133	0.82052	NaN	0.81202	0.79404	NaN	0.94809	0.64898	NaN	NaN	0.78049	NaN	0.83423	0.62265	NaN	0.74674	0.71218	NaN	1.1474	0.5259	0.68595	NaN	0.80225
NaN	NaN	NaN	NaN	NaN	NaN	NaN	NaN	0.86637	NaN	NaN	NaN	NaN	NaN	NaN	NaN	0.62057	NaN	NaN	0.91572	0.85393	NaN	0.58381	NaN	NaN	NaN	NaN	NaN	NaN	NaN	NaN	0.7988	NaN	NaN	0.34474	0.81103	NaN	1.0157	NaN	NaN	0.40072	NaN	NaN	0.51677	NaN	0.94323	NaN	0.43776	NaN	0.33191
NaN	NaN	NaN	NaN	NaN	NaN	NaN	NaN	NaN	NaN	NaN	NaN	NaN	NaN	NaN	NaN	NaN	NaN	NaN	NaN	NaN	NaN	NaN	NaN	NaN	NaN	NaN	NaN	NaN	NaN	NaN	NaN	NaN	NaN	NaN	NaN	NaN	NaN	NaN	NaN	NaN	NaN	NaN	NaN	NaN	NaN	NaN	NaN	NaN	NaN
0.81151	0.74149	1.0032	0.58496	0.72222	1.0785	0.35797	0.60477	0.92136	0.62271	0.59235	0.84416	0.60997	0.66609	0.95045	0.79745	0.60547	0.97082	0.67384	0.57442	0.9384	0.54477	0.68225	1.0242	0.68402	0.6969	0.76651	0.6828	0.60279	0.80343	0.72064	0.76565	0.93397	0.73559	0.62389	1.0519	0.61798	0.69964	1.0237	0.7601	0.59046	1.025	0.73928	0.71637	1.0325	1.0098	0.82325	0.66523	1.2469	0.66823
0.87092	0.7656	0.95213	0.56418	0.7572	1.0669	0.33046	0.74391	0.94882	0.66024	0.67812	0.81589	0.57722	0.71099	0.8572	0.78862	0.60714	1.0109	0.66672	0.64584	0.9434	0.57393	0.73738	1.0363	0.70152	0.69845	0.9514	0.71763	0.67639	0.99583	0.7644	0.78265	0.88435	0.7245	0.49042	0.9703	0.64181	0.69657	0.95733	0.78374	0.49255	1.0642	0.7755	0.61255	0.93463	1.0802	0.73622	0.744	1.3401	0.5304
NaN	NaN	NaN	NaN	NaN	NaN	NaN	NaN	NaN	NaN	NaN	NaN	NaN	NaN	NaN	NaN	NaN	NaN	NaN	NaN	NaN	NaN	NaN	NaN	NaN	NaN	NaN	NaN	NaN	NaN	NaN	NaN	NaN	NaN	NaN	NaN	NaN	NaN	NaN	NaN	NaN	NaN	NaN	NaN	NaN	NaN	NaN	NaN	NaN	NaN
0.99239	0.68902	0.83893	0.74025	0.76753	1.1485	0.4312	0.71489	0.85484	0.87759	0.61853	0.9745	0.66854	0.72525	0.91905	0.80017	0.67898	NaN	0.70517	0.63497	0.80221	0.75668	0.71719	1.0489	0.79899	0.71423	0.95038	0.72467	0.69455	0.87418	0.80459	0.76019	1.0329	0.75074	0.52031	0.95415	0.59587	0.75342	0.93093	0.79499	0.54525	1.0402	0.7149	0.66627	1.0416	0.96185	0.67381	0.52396	1.2973	0.62784
NaN	0.62843	NaN	0.66908	0.76949	NaN	0.4241	0.60771	NaN	0.67539	0.63118	0.90043	0.60405	0.67842	0.95717	0.68696	0.62524	NaN	0.74054	0.88513	NaN	0.62137	0.76113	NaN	0.75082	0.65156	NaN	0.64477	NaN	0.84944	0.69567	0.70663	1.0034	0.62304	0.41735	0.89151	0.56554	1.059	1.0156	0.74275	0.49632	1.3057	0.84615	0.48438	NaN	0.94674	NaN	0.54855	1.2833	0.49846
0.99047	0.70346	NaN	0.61572	0.67614	1.1023	NaN	NaN	NaN	0.94205	0.70855	NaN	0.67085	0.4455	0.85891	0.73891	NaN	NaN	NaN	NaN	NaN	0.72939	NaN	NaN	NaN	NaN	NaN	NaN	0.5363	0.99645	0.81937	NaN	NaN	0.80929	NaN	1.2261	0.70801	NaN	0.99011	NaN	NaN	NaN	NaN	0.5184	NaN	NaN	0.71169	NaN	NaN	NaN
0.97156	0.57969	NaN	0.62455	NaN	1.0175	NaN	0.73942	NaN	0.66773	NaN	0.8044	NaN	NaN	NaN	NaN	NaN	0.89067	0.61944	NaN	NaN	0.53355	0.72893	NaN	0.69721	0.68564	NaN	0.67229	NaN	NaN	0.7346	0.75798	0.71388	0.86002	0.56935	1.0145	NaN	0.7674	0.98075	0.88359	0.57562	0.90683	0.70241	0.84429	0.56399	NaN	NaN	0.68193	NaN	0.95342
NaN	NaN	NaN	NaN	NaN	NaN	NaN	NaN	NaN	NaN	NaN	NaN	NaN	NaN	NaN	NaN	NaN	NaN	NaN	NaN	NaN	NaN	NaN	NaN	NaN	NaN	NaN	NaN	NaN	NaN	NaN	NaN	NaN	NaN	NaN	NaN	NaN	NaN	NaN	NaN	NaN	NaN	NaN	NaN	NaN	NaN	NaN	NaN	NaN	NaN
0.85973	NaN	NaN	0.61553	NaN	NaN	NaN	NaN	NaN	0.45254	NaN	NaN	NaN	NaN	NaN	0.73876	NaN	NaN	NaN	NaN	NaN	NaN	NaN	NaN	0.49873	0.72719	NaN	NaN	NaN	NaN	NaN	NaN	NaN	0.54135	NaN	NaN	NaN	1.0199	NaN	NaN	NaN	NaN	NaN	0.78889	NaN	NaN	NaN	NaN	NaN	NaN
NaN	NaN	NaN	NaN	NaN	NaN	NaN	NaN	NaN	NaN	NaN	NaN	NaN	NaN	NaN	NaN	NaN	NaN	NaN	NaN	NaN	NaN	NaN	NaN	NaN	NaN	NaN	NaN	NaN	NaN	NaN	NaN	NaN	NaN	NaN	NaN	NaN	NaN	NaN	NaN	NaN	NaN	NaN	NaN	NaN	NaN	NaN	NaN	NaN	NaN
NaN	0.73163	NaN	NaN	NaN	NaN	0.53822	NaN	NaN	NaN	0.84947	NaN	NaN	NaN	NaN	0.81333	0.59374	NaN	0.81758	NaN	NaN	NaN	NaN	NaN	0.849	1.0017	NaN	NaN	NaN	NaN	0.82865	0.64328	NaN	0.77799	NaN	NaN	NaN	1.1352	NaN	NaN	NaN	NaN	NaN	NaN	NaN	1.0983	NaN	NaN	NaN	NaN
0.52506	0.9837	0.86415	0.43863	NaN	NaN	0.44159	NaN	NaN	0.47307	NaN	NaN	0.87112	0.51919	NaN	1.1822	NaN	NaN	0.43236	0.6906	NaN	0.46818	0.61697	NaN	0.50854	NaN	NaN	0.4085	NaN	NaN	0.68723	0.92393	NaN	NaN	NaN	NaN	0.67508	NaN	NaN	0.42644	0.66977	NaN	0.42208	0.44265	NaN	NaN	NaN	0.73823	NaN	NaN
NaN	NaN	NaN	NaN	NaN	NaN	NaN	NaN	NaN	NaN	NaN	NaN	NaN	NaN	NaN	NaN	NaN	NaN	NaN	NaN	NaN	NaN	NaN	NaN	NaN	NaN	NaN	NaN	NaN	NaN	NaN	NaN	NaN	NaN	NaN	NaN	NaN	NaN	NaN	NaN	NaN	NaN	NaN	NaN	NaN	NaN	NaN	0.60624	NaN	NaN
NaN	NaN	NaN	NaN	NaN	NaN	NaN	NaN	NaN	NaN	NaN	NaN	NaN	NaN	NaN	NaN	NaN	NaN	NaN	NaN	NaN	NaN	NaN	NaN	NaN	NaN	NaN	NaN	NaN	NaN	NaN	NaN	NaN	NaN	NaN	NaN	NaN	NaN	NaN	NaN	NaN	NaN	NaN	NaN	NaN	NaN	NaN	NaN	NaN	NaN
0.69283	NaN	NaN	NaN	NaN	NaN	0.62927	0.79541	NaN	NaN	0.57311	NaN	0.75329	NaN	NaN	NaN	NaN	NaN	NaN	NaN	NaN	0.69119	NaN	NaN	0.95171	0.73907	NaN	0.63835	NaN	NaN	NaN	NaN	NaN	NaN	0.57042	NaN	0.51647	0.71543	NaN	1.2173	0.70039	NaN	NaN	NaN	NaN	NaN	NaN	NaN	NaN	NaN
0.85891	0.73818	0.89256	0.6071	0.67036	1.0324	0.35357	0.72272	1.0344	0.63668	0.74202	NaN	0.60787	0.69106	0.93419	0.82967	0.64184	1.1126	0.70931	0.65633	0.96352	0.63079	0.68762	0.95474	0.7542	0.78329	0.69383	0.75569	0.64112	0.87702	0.86091	0.72347	0.70635	0.79212	0.63153	0.83326	0.61258	0.92302	0.85668	0.76231	0.61359	1.0895	0.83849	0.89993	1.0285	0.93047	0.81796	0.77442	1.2934	0.6295
NaN	NaN	NaN	NaN	NaN	NaN	NaN	NaN	NaN	NaN	NaN	NaN	NaN	NaN	NaN	NaN	NaN	NaN	NaN	NaN	NaN	NaN	NaN	NaN	NaN	NaN	NaN	NaN	NaN	NaN	NaN	NaN	NaN	NaN	NaN	NaN	NaN	NaN	NaN	NaN	NaN	NaN	NaN	NaN	NaN	NaN	NaN	NaN	NaN	NaN
0.72221	NaN	NaN	0.47356	0.53222	NaN	NaN	NaN	NaN	0.74651	NaN	NaN	NaN	NaN	NaN	0.85219	NaN	NaN	NaN	NaN	NaN	0.59137	NaN	NaN	NaN	NaN	NaN	0.59515	NaN	NaN	0.77846	NaN	NaN	0.72229	0.6412	NaN	NaN	NaN	NaN	0.67015	NaN	NaN	0.62702	NaN	NaN	NaN	NaN	NaN	NaN	NaN
NaN	NaN	NaN	NaN	NaN	NaN	NaN	NaN	NaN	NaN	NaN	NaN	NaN	NaN	NaN	NaN	NaN	NaN	NaN	NaN	NaN	NaN	NaN	NaN	NaN	NaN	NaN	NaN	NaN	NaN	NaN	NaN	NaN	NaN	NaN	NaN	NaN	NaN	NaN	NaN	NaN	NaN	NaN	NaN	NaN	NaN	NaN	NaN	NaN	NaN
0.96746	NaN	NaN	NaN	NaN	NaN	NaN	0.59082	NaN	0.75683	NaN	NaN	0.72762	NaN	NaN	NaN	NaN	NaN	0.72214	NaN	NaN	0.7222	NaN	NaN	NaN	NaN	NaN	NaN	NaN	NaN	NaN	NaN	NaN	NaN	NaN	NaN	0.81506	NaN	NaN	NaN	NaN	NaN	NaN	NaN	NaN	NaN	NaN	NaN	NaN	NaN
NaN	NaN	NaN	NaN	NaN	NaN	NaN	NaN	NaN	NaN	NaN	NaN	NaN	NaN	NaN	NaN	NaN	NaN	NaN	NaN	NaN	NaN	NaN	NaN	NaN	NaN	NaN	NaN	NaN	NaN	NaN	NaN	NaN	NaN	NaN	NaN	NaN	NaN	NaN	NaN	NaN	NaN	NaN	NaN	NaN	NaN	NaN	NaN	NaN	NaN
NaN	NaN	NaN	NaN	NaN	NaN	NaN	NaN	NaN	NaN	NaN	NaN	NaN	NaN	NaN	NaN	NaN	NaN	NaN	NaN	NaN	NaN	NaN	NaN	NaN	NaN	NaN	NaN	NaN	NaN	NaN	NaN	NaN	NaN	NaN	NaN	NaN	NaN	NaN	NaN	NaN	NaN	NaN	NaN	NaN	NaN	NaN	NaN	NaN	NaN
0.89287	0.74612	0.99731	0.59124	0.77044	1.0274	0.36694	0.70347	0.79927	0.5922	0.79123	0.92652	0.57067	0.77577	0.94158	0.83873	0.68988	0.8413	0.75869	0.61325	0.87009	0.51566	0.70635	0.84048	0.68775	0.74741	1.0746	0.73154	0.6818	0.80749	0.80769	0.80134	0.90981	0.57423	0.31043	0.88382	0.65389	0.76455	0.99813	0.78006	0.34767	1.119	0.63417	0.40373	0.94865	0.96983	0.73594	0.48565	1.3987	0.38211
NaN	NaN	NaN	NaN	NaN	NaN	NaN	NaN	NaN	NaN	NaN	NaN	NaN	NaN	NaN	NaN	NaN	NaN	NaN	NaN	NaN	NaN	NaN	NaN	NaN	NaN	NaN	NaN	NaN	NaN	NaN	NaN	NaN	NaN	NaN	NaN	NaN	NaN	NaN	NaN	NaN	NaN	NaN	NaN	NaN	NaN	NaN	NaN	NaN	NaN
0.78023	0.69007	1.0964	0.57974	0.70201	NaN	0.42989	0.67503	0.84601	0.75932	0.5823	NaN	0.49564	0.67414	NaN	0.97498	0.63153	1.0129	0.72902	0.61454	NaN	0.68407	0.66747	1.1754	0.78451	0.74154	0.88816	0.79917	0.58385	0.70281	0.83109	0.96685	NaN	0.75674	0.68081	NaN	NaN	0.70298	0.96656	0.87988	0.73928	1.4703	0.69308	0.7754	0.90279	1.1149	NaN	0.90469	NaN	0.64116
NaN	NaN	NaN	NaN	NaN	NaN	NaN	NaN	NaN	NaN	NaN	NaN	NaN	NaN	NaN	NaN	NaN	NaN	NaN	NaN	NaN	NaN	NaN	NaN	NaN	NaN	NaN	NaN	NaN	NaN	NaN	NaN	NaN	NaN	NaN	NaN	NaN	NaN	NaN	NaN	NaN	NaN	NaN	NaN	NaN	NaN	NaN	NaN	NaN	NaN
NaN	0.48971	NaN	NaN	NaN	NaN	NaN	NaN	NaN	NaN	NaN	NaN	NaN	NaN	NaN	NaN	NaN	NaN	NaN	NaN	NaN	NaN	NaN	NaN	NaN	NaN	NaN	NaN	NaN	NaN	NaN	0.65786	NaN	NaN	NaN	NaN	NaN	NaN	NaN	NaN	NaN	NaN	NaN	0.98389	NaN	NaN	NaN	NaN	NaN	0.90347
NaN	NaN	NaN	0.64566	NaN	NaN	NaN	NaN	NaN	0.66268	NaN	NaN	NaN	NaN	NaN	0.70375	NaN	NaN	NaN	NaN	NaN	NaN	NaN	NaN	NaN	3.2409	NaN	NaN	NaN	NaN	NaN	NaN	NaN	NaN	2.9908	NaN	NaN	NaN	NaN	NaN	NaN	NaN	NaN	NaN	NaN	NaN	NaN	NaN	NaN	NaN
NaN	NaN	NaN	NaN	NaN	NaN	NaN	NaN	NaN	NaN	NaN	NaN	NaN	NaN	NaN	NaN	NaN	NaN	NaN	NaN	NaN	NaN	NaN	NaN	NaN	NaN	NaN	NaN	NaN	NaN	NaN	NaN	NaN	NaN	NaN	NaN	NaN	NaN	NaN	NaN	NaN	NaN	NaN	NaN	NaN	NaN	NaN	NaN	NaN	NaN
NaN	NaN	NaN	NaN	NaN	NaN	NaN	NaN	NaN	NaN	NaN	NaN	NaN	NaN	NaN	NaN	NaN	NaN	NaN	NaN	NaN	NaN	NaN	NaN	NaN	NaN	NaN	NaN	NaN	NaN	NaN	NaN	NaN	NaN	NaN	NaN	NaN	NaN	NaN	NaN	NaN	NaN	NaN	NaN	NaN	NaN	NaN	NaN	NaN	NaN
NaN	NaN	NaN	NaN	NaN	NaN	NaN	NaN	NaN	NaN	NaN	NaN	NaN	NaN	NaN	NaN	NaN	NaN	NaN	NaN	NaN	NaN	NaN	NaN	NaN	NaN	NaN	NaN	NaN	NaN	NaN	NaN	NaN	NaN	NaN	NaN	NaN	NaN	NaN	NaN	NaN	NaN	NaN	NaN	NaN	NaN	NaN	NaN	NaN	NaN
NaN	NaN	NaN	NaN	NaN	NaN	NaN	NaN	NaN	NaN	NaN	NaN	NaN	NaN	NaN	NaN	NaN	NaN	NaN	NaN	NaN	NaN	NaN	NaN	NaN	NaN	NaN	NaN	NaN	NaN	NaN	NaN	NaN	NaN	NaN	NaN	NaN	NaN	NaN	NaN	NaN	NaN	NaN	NaN	NaN	NaN	NaN	NaN	NaN	NaN
NaN	NaN	NaN	NaN	NaN	NaN	NaN	NaN	NaN	NaN	NaN	NaN	NaN	NaN	NaN	NaN	NaN	NaN	NaN	NaN	NaN	NaN	NaN	NaN	NaN	NaN	NaN	NaN	NaN	NaN	NaN	NaN	NaN	NaN	NaN	NaN	NaN	NaN	NaN	NaN	NaN	NaN	NaN	NaN	NaN	NaN	NaN	NaN	NaN	NaN
NaN	NaN	NaN	NaN	NaN	NaN	NaN	NaN	NaN	NaN	NaN	NaN	NaN	NaN	NaN	NaN	NaN	NaN	NaN	NaN	NaN	NaN	NaN	NaN	NaN	NaN	NaN	NaN	NaN	NaN	NaN	NaN	NaN	NaN	NaN	NaN	NaN	NaN	NaN	NaN	NaN	NaN	NaN	NaN	NaN	NaN	NaN	NaN	NaN	NaN
NaN	0.89924	NaN	0.84664	0.849	NaN	0.48771	NaN	NaN	NaN	1.0195	NaN	0.58346	1.1973	NaN	0.88497	NaN	NaN	0.77991	1.0679	NaN	0.61342	NaN	NaN	0.78303	1.2569	NaN	0.8316	NaN	NaN	NaN	0.65337	NaN	NaN	0.85818	NaN	0.57152	1.2613	NaN	0.82419	0.81665	NaN	0.85655	0.88791	NaN	NaN	NaN	0.82614	NaN	1.002
0.63371	NaN	NaN	0.66175	0.6028	NaN	0.48156	0.82264	0.76335	0.46088	NaN	NaN	0.70357	NaN	NaN	0.79765	NaN	NaN	0.76765	0.71164	NaN	0.72579	NaN	NaN	0.81906	NaN	NaN	0.77543	0.53848	NaN	0.79603	0.92977	NaN	0.82223	NaN	NaN	0.63695	NaN	NaN	0.84796	0.7994	NaN	0.7301	0.90812	NaN	0.95143	NaN	0.87218	NaN	0.94828
NaN	NaN	NaN	NaN	NaN	NaN	NaN	NaN	NaN	NaN	NaN	NaN	NaN	NaN	NaN	NaN	NaN	NaN	NaN	NaN	NaN	NaN	NaN	NaN	1.4424	NaN	NaN	NaN	NaN	NaN	NaN	0.82354	NaN	NaN	0.65466	NaN	NaN	NaN	NaN	NaN	NaN	NaN	NaN	0.80892	NaN	NaN	NaN	0.85955	NaN	0.77442
0.81569	0.59987	1.0776	0.73473	NaN	1.327	0.34876	0.59538	1.1774	0.90902	NaN	0.82617	0.69139	0.52047	NaN	0.91067	NaN	1.2083	NaN	0.60853	0.87603	0.92782	NaN	0.91141	0.84429	NaN	0.94821	0.71488	NaN	0.77894	0.72891	NaN	NaN	0.47961	0.38222	1.0087	0.55023	NaN	1.1474	0.69372	0.51706	0.9913	0.62153	NaN	NaN	0.79672	0.63766	NaN	NaN	0.36316
0.70055	0.78046	0.9905	0.52089	0.83443	NaN	0.34054	0.59932	0.69641	0.60444	0.69918	1.2391	0.54864	0.67934	NaN	0.75435	0.67351	0.73391	0.6357	0.86157	NaN	0.60134	0.85118	NaN	0.62746	0.78251	NaN	0.67339	NaN	0.69883	0.59156	0.77748	1.1611	0.68224	0.57454	NaN	0.58302	0.64875	NaN	0.67216	0.64893	NaN	0.68245	0.71305	0.5945	0.94757	NaN	0.45807	1.4837	0.58316
NaN	NaN	NaN	NaN	NaN	NaN	NaN	NaN	NaN	NaN	NaN	NaN	NaN	NaN	NaN	NaN	NaN	NaN	NaN	NaN	NaN	NaN	NaN	NaN	NaN	NaN	NaN	NaN	NaN	NaN	NaN	NaN	NaN	NaN	NaN	NaN	NaN	NaN	NaN	NaN	NaN	NaN	NaN	NaN	NaN	NaN	NaN	NaN	NaN	NaN
0.7502	0.65617	1.2231	0.54088	0.68275	1.0946	0.33717	0.52315	0.89365	0.67543	0.65788	0.76543	0.63772	0.65399	0.9403	0.92508	0.64686	0.94275	0.65454	0.61018	0.85561	0.51407	0.74107	0.95662	0.69257	0.8632	0.74675	0.69528	0.71964	0.77459	0.76806	0.68676	0.82205	0.75712	0.69332	1.0517	0.55154	0.75886	0.8525	0.72725	0.65591	0.99293	0.70053	0.68298	0.80864	1.1693	0.64149	0.84548	1.3427	0.77341
NaN	NaN	NaN	NaN	NaN	NaN	NaN	NaN	NaN	NaN	NaN	NaN	NaN	NaN	NaN	NaN	NaN	NaN	NaN	NaN	NaN	NaN	NaN	NaN	NaN	NaN	NaN	NaN	NaN	NaN	NaN	NaN	NaN	NaN	NaN	NaN	NaN	NaN	NaN	NaN	NaN	NaN	NaN	NaN	NaN	NaN	NaN	NaN	NaN	NaN
NaN	NaN	NaN	NaN	NaN	NaN	NaN	NaN	NaN	NaN	NaN	NaN	NaN	NaN	NaN	NaN	NaN	NaN	NaN	NaN	NaN	NaN	NaN	NaN	NaN	NaN	NaN	NaN	NaN	NaN	NaN	NaN	NaN	NaN	NaN	NaN	NaN	NaN	NaN	NaN	NaN	NaN	NaN	NaN	NaN	NaN	NaN	NaN	NaN	NaN
0.98262	0.74705	1.1083	0.65444	NaN	1.0949	0.42797	NaN	0.94948	1.8768	0.60808	0.81305	0.90293	NaN	0.88115	1.2086	0.66514	0.94686	0.93407	NaN	NaN	1.9947	0.90247	1.2838	0.79008	NaN	1.0367	0.9414	0.68631	0.8427	1.0363	0.8937	NaN	0.77679	NaN	0.90466	0.60793	NaN	1.0008	0.63323	0.42405	1.2531	0.5933	0.4678	0.8251	0.65946	0.78081	NaN	1.332	0.6074
NaN	NaN	NaN	NaN	NaN	NaN	NaN	NaN	NaN	NaN	NaN	NaN	NaN	NaN	NaN	NaN	NaN	NaN	NaN	NaN	NaN	NaN	NaN	NaN	NaN	NaN	NaN	NaN	NaN	NaN	NaN	NaN	NaN	NaN	NaN	NaN	NaN	NaN	NaN	NaN	NaN	NaN	NaN	NaN	NaN	NaN	NaN	NaN	NaN	NaN
1.1887	1.1324	0.85525	NaN	0.62846	1.5992	NaN	0.65098	1.6882	NaN	1.5763	0.77241	NaN	NaN	1.1185	NaN	NaN	NaN	0.79714	NaN	1.1877	1.2546	0.61448	NaN	0.60699	NaN	NaN	0.92139	NaN	NaN	NaN	NaN	NaN	0.75336	0.88165	NaN	0.95835	NaN	NaN	NaN	NaN	0.4942	0.56888	NaN	NaN	NaN	NaN	1.24	NaN	NaN
NaN	0.77325	NaN	0.69252	0.6972	NaN	0.40932	NaN	NaN	NaN	0.53598	NaN	NaN	NaN	NaN	1.0652	0.5497	NaN	NaN	NaN	NaN	NaN	NaN	NaN	NaN	NaN	NaN	0.68768	0.64697	0.69325	NaN	NaN	NaN	NaN	NaN	NaN	0.74783	NaN	NaN	0.78263	NaN	NaN	0.74545	NaN	NaN	NaN	NaN	NaN	NaN	NaN
NaN	NaN	NaN	NaN	NaN	NaN	NaN	NaN	NaN	NaN	NaN	NaN	NaN	NaN	NaN	NaN	NaN	NaN	NaN	NaN	NaN	NaN	NaN	NaN	NaN	NaN	NaN	NaN	NaN	NaN	NaN	NaN	NaN	NaN	NaN	NaN	NaN	NaN	NaN	NaN	NaN	NaN	NaN	0.76421	NaN	NaN	NaN	NaN	NaN	NaN
1.068	0.64075	NaN	0.68131	NaN	NaN	NaN	NaN	NaN	0.72387	0.59794	NaN	0.75645	0.69328	NaN	1.0476	NaN	NaN	0.78435	NaN	NaN	NaN	0.74117	NaN	0.81349	NaN	NaN	0.83409	0.5873	NaN	0.98308	NaN	NaN	0.94936	NaN	NaN	0.66652	NaN	NaN	NaN	NaN	NaN	0.7363	NaN	NaN	NaN	NaN	NaN	NaN	NaN
NaN	NaN	NaN	NaN	NaN	NaN	NaN	NaN	NaN	NaN	NaN	NaN	NaN	NaN	NaN	NaN	NaN	NaN	NaN	NaN	NaN	NaN	NaN	NaN	NaN	NaN	NaN	NaN	NaN	NaN	NaN	NaN	NaN	NaN	NaN	NaN	NaN	NaN	NaN	NaN	NaN	NaN	NaN	NaN	NaN	NaN	NaN	NaN	NaN	NaN
0.82042	NaN	NaN	NaN	NaN	NaN	NaN	NaN	NaN	NaN	NaN	NaN	NaN	NaN	NaN	NaN	NaN	NaN	NaN	NaN	NaN	NaN	NaN	NaN	NaN	NaN	NaN	0.73945	NaN	NaN	NaN	NaN	NaN	0.89408	NaN	NaN	0.54546	NaN	NaN	NaN	NaN	NaN	0.8916	NaN	NaN	NaN	NaN	NaN	NaN	NaN
0.89031	0.84489	0.92372	0.5999	0.63787	1.2499	0.37756	0.62081	0.87601	0.66634	0.58007	0.94551	0.6638	0.64063	0.66658	0.90773	0.60229	0.98197	0.81208	0.61601	0.92496	0.68777	0.668	1.0806	0.79539	0.69589	0.73153	0.71528	0.62128	0.91063	0.84928	0.72047	0.90279	0.79623	0.61673	0.79271	0.68397	0.77329	0.81563	0.75544	0.63915	1.3119	0.71798	0.72272	0.9364	1.054	0.74051	0.62408	1.1867	0.78331
0.77655	0.74908	1.1479	0.62552	0.69677	1.3959	0.39641	0.68543	0.86582	0.6685	0.59532	0.90756	0.64461	0.64326	1.0182	0.92705	0.63662	1.225	0.68082	0.66448	1.0383	0.57644	0.69446	0.88771	0.86587	0.63838	0.78324	0.70327	0.59689	0.79602	0.79155	0.74745	1.0324	0.82257	0.60022	0.76987	0.60946	0.66498	0.93002	0.75103	0.52657	0.97272	0.7709	0.69154	0.99589	0.80988	0.81959	0.61932	1.5948	0.68367
0.9302	0.71584	1.0385	0.56108	0.67919	1.2213	0.25084	0.56974	1.074	0.58948	0.56265	0.81571	0.49597	0.53034	0.79091	0.81517	0.58553	0.91154	0.64379	0.55813	NaN	0.58271	0.53364	0.89503	0.56092	0.69023	1.0028	0.72498	0.61935	0.90349	0.69475	0.65722	1.0117	0.67645	0.89718	0.91635	0.58749	0.60623	0.94051	0.76124	0.55802	1.2728	0.68455	1.1047	0.88528	1.498	0.76999	0.97605	1.4385	0.85812
0.82219	0.65586	NaN	0.53639	0.60837	NaN	0.2708	0.54895	0.87254	0.66227	0.57719	NaN	0.49166	0.58382	NaN	0.85043	0.64761	0.98012	0.519	0.52687	0.86691	0.39512	NaN	0.82359	0.60037	0.60884	0.86121	0.6539	0.54184	0.81762	0.88508	NaN	0.8328	0.62462	0.30585	0.89576	0.64142	0.65968	1.0304	0.74031	0.34751	1.0854	0.70039	0.42526	0.87963	0.82573	0.68575	0.53172	1.1712	0.50231
0.93927	NaN	1.0002	0.77237	1.8785	NaN	NaN	0.99533	0.77449	0.76088	0.98067	NaN	0.7163	1.1406	NaN	NaN	0.79744	1.0901	0.8288	NaN	NaN	1.593	NaN	0.9694	0.83797	0.97975	0.58	0.80296	NaN	0.88559	0.79095	0.71942	NaN	0.81798	0.66202	0.99529	NaN	NaN	1.0669	0.88726	NaN	1.0439	0.97272	0.55145	0.9846	1.4857	0.75045	0.92997	1.4919	NaN
1.1711	0.79494	1.0425	0.65697	0.85835	NaN	NaN	0.63734	NaN	NaN	0.69174	NaN	0.85273	0.72687	0.98751	NaN	0.63579	NaN	0.81144	0.60885	NaN	0.63122	0.65835	NaN	0.84399	0.62968	1.0258	0.8475	0.7547	NaN	0.75163	0.79259	NaN	NaN	0.60299	NaN	0.67906	0.69226	NaN	0.67281	0.90543	NaN	NaN	0.68166	NaN	1.0557	NaN	0.661	NaN	0.64215
NaN	NaN	NaN	0.99103	NaN	NaN	NaN	NaN	NaN	NaN	NaN	NaN	NaN	NaN	NaN	NaN	NaN	NaN	NaN	NaN	NaN	NaN	NaN	NaN	NaN	NaN	NaN	0.80741	NaN	NaN	NaN	NaN	NaN	NaN	NaN	NaN	0.66389	NaN	NaN	1.0607	NaN	NaN	0.8842	NaN	NaN	NaN	NaN	NaN	NaN	NaN
NaN	NaN	NaN	NaN	NaN	NaN	NaN	NaN	NaN	NaN	0.83393	NaN	NaN	NaN	NaN	NaN	NaN	NaN	NaN	0.66384	NaN	NaN	1.0213	NaN	NaN	NaN	NaN	NaN	NaN	NaN	NaN	1.2272	NaN	NaN	NaN	NaN	NaN	NaN	NaN	NaN	NaN	NaN	NaN	NaN	NaN	NaN	NaN	NaN	NaN	NaN
NaN	NaN	NaN	NaN	NaN	NaN	NaN	NaN	NaN	NaN	NaN	NaN	NaN	NaN	NaN	NaN	NaN	NaN	NaN	NaN	NaN	NaN	NaN	NaN	NaN	NaN	NaN	NaN	NaN	NaN	NaN	NaN	NaN	NaN	NaN	NaN	NaN	NaN	NaN	NaN	NaN	NaN	NaN	NaN	NaN	NaN	NaN	NaN	NaN	NaN
NaN	NaN	NaN	NaN	NaN	NaN	NaN	NaN	NaN	NaN	NaN	NaN	NaN	NaN	NaN	NaN	NaN	NaN	NaN	NaN	NaN	NaN	NaN	NaN	NaN	NaN	NaN	NaN	NaN	NaN	NaN	NaN	NaN	NaN	NaN	NaN	NaN	NaN	NaN	NaN	NaN	NaN	NaN	NaN	NaN	NaN	NaN	NaN	NaN	NaN
NaN	NaN	NaN	NaN	NaN	NaN	NaN	NaN	NaN	NaN	NaN	NaN	NaN	NaN	NaN	NaN	NaN	NaN	NaN	NaN	NaN	NaN	NaN	NaN	NaN	NaN	NaN	NaN	NaN	NaN	NaN	NaN	NaN	NaN	NaN	NaN	NaN	NaN	NaN	NaN	NaN	NaN	NaN	NaN	NaN	NaN	NaN	NaN	NaN	NaN
NaN	NaN	NaN	NaN	NaN	NaN	NaN	NaN	NaN	NaN	NaN	NaN	NaN	NaN	NaN	NaN	NaN	NaN	NaN	NaN	NaN	NaN	NaN	NaN	NaN	NaN	NaN	NaN	NaN	NaN	NaN	NaN	NaN	NaN	NaN	NaN	NaN	NaN	NaN	NaN	NaN	NaN	NaN	NaN	NaN	NaN	NaN	NaN	NaN	NaN
0.95767	NaN	NaN	0.7431	1.1775	NaN	NaN	NaN	NaN	NaN	NaN	NaN	0.75561	NaN	NaN	0.98211	NaN	NaN	0.8	NaN	NaN	0.75605	0.98192	NaN	0.85777	NaN	NaN	NaN	NaN	NaN	NaN	NaN	NaN	NaN	NaN	NaN	NaN	NaN	NaN	NaN	NaN	NaN	NaN	NaN	NaN	NaN	NaN	NaN	NaN	0.87279
NaN	NaN	NaN	NaN	NaN	NaN	NaN	NaN	NaN	NaN	NaN	NaN	NaN	NaN	NaN	NaN	NaN	NaN	NaN	NaN	NaN	NaN	NaN	NaN	NaN	NaN	NaN	NaN	NaN	NaN	NaN	NaN	NaN	NaN	NaN	NaN	NaN	NaN	NaN	NaN	NaN	NaN	NaN	NaN	NaN	NaN	NaN	NaN	NaN	NaN
NaN	NaN	NaN	NaN	NaN	NaN	NaN	NaN	NaN	NaN	NaN	NaN	NaN	0.60747	NaN	NaN	NaN	NaN	NaN	NaN	NaN	NaN	NaN	NaN	NaN	0.9366	NaN	NaN	NaN	0.89671	0.63218	NaN	NaN	NaN	NaN	NaN	NaN	NaN	0.9493	1.0302	NaN	NaN	NaN	NaN	NaN	NaN	NaN	NaN	NaN	NaN
NaN	NaN	NaN	NaN	NaN	NaN	NaN	NaN	NaN	NaN	NaN	NaN	NaN	NaN	NaN	NaN	NaN	NaN	NaN	NaN	NaN	NaN	NaN	NaN	NaN	NaN	NaN	NaN	NaN	NaN	NaN	NaN	NaN	NaN	NaN	NaN	NaN	NaN	NaN	NaN	NaN	NaN	NaN	NaN	NaN	NaN	NaN	NaN	NaN	NaN
0.88345	0.89314	1.0388	0.57591	0.86264	1.0818	0.36615	0.7771	1.0253	0.76473	0.67148	0.80911	0.57993	0.81924	0.96875	0.80583	0.75088	0.97185	0.80717	0.59755	0.85518	0.62647	0.82217	1.0476	0.8982	0.73348	0.77479	0.65449	0.66043	0.808	0.72123	0.85652	0.95936	0.80008	0.61407	1.0683	0.5508	0.94835	0.94214	0.80322	0.59943	1.0768	0.86029	0.66758	0.94451	0.90309	0.75329	0.66117	1.4141	0.74325
0.78929	0.63485	1.1258	0.67994	0.68335	1.1331	0.40365	0.62615	0.81386	0.6845	0.60362	1.2062	0.59695	0.64276	0.72767	0.81433	0.59155	0.98735	0.72693	0.61819	NaN	0.53617	0.74984	1.0472	0.66707	0.74515	0.74369	0.65842	0.63228	0.91908	0.73492	0.81189	0.8915	0.70119	0.55599	0.84795	0.57033	0.84267	0.94254	0.76903	0.58135	1.0396	0.71543	0.64179	0.84141	1.0273	0.79907	0.586	1.103	0.61666
0.90555	NaN	0.97959	0.65528	0.67922	1.3072	0.38829	NaN	1.0954	1.896	NaN	1.0069	0.72717	0.67423	0.75488	1.0986	NaN	0.92238	0.96533	NaN	0.91309	1.9402	NaN	0.98981	0.74432	NaN	0.81867	1.1673	NaN	0.78082	0.93339	NaN	0.86847	0.85193	NaN	0.88884	0.53423	NaN	0.90593	0.55199	NaN	0.91959	0.49839	NaN	0.84728	NaN	0.746	NaN	1.2532	NaN
NaN	NaN	0.84373	NaN	NaN	NaN	NaN	NaN	NaN	NaN	NaN	NaN	NaN	NaN	NaN	NaN	NaN	NaN	NaN	NaN	NaN	NaN	NaN	NaN	NaN	NaN	NaN	NaN	NaN	NaN	NaN	NaN	NaN	NaN	NaN	NaN	NaN	NaN	NaN	NaN	NaN	NaN	NaN	NaN	NaN	NaN	NaN	NaN	NaN	NaN
NaN	NaN	NaN	NaN	NaN	NaN	NaN	NaN	NaN	NaN	NaN	NaN	NaN	NaN	NaN	NaN	NaN	NaN	0.94092	NaN	NaN	NaN	NaN	NaN	NaN	NaN	NaN	NaN	NaN	NaN	NaN	NaN	NaN	NaN	NaN	NaN	NaN	NaN	NaN	NaN	NaN	NaN	NaN	NaN	NaN	NaN	NaN	NaN	NaN	NaN
0.86956	0.82779	0.99754	0.67681	0.78124	1.0877	0.40871	0.71447	0.96225	0.68951	0.67747	0.82879	0.64479	0.71143	0.86857	0.88388	0.66524	0.88097	0.756	0.63216	0.85627	0.60628	0.80282	0.85903	0.75686	0.73401	0.84901	0.75593	0.69267	0.82373	0.80234	0.87491	0.88159	0.7444	0.78888	0.84934	0.61699	0.88014	0.83273	0.78876	0.79867	0.98736	0.7232	0.84719	0.96613	1.2423	0.68238	0.79461	1.3547	0.89187
1.0358	0.73403	NaN	NaN	0.75888	NaN	NaN	0.67321	NaN	0.81248	0.64211	NaN	0.63284	0.58224	NaN	0.82464	0.83943	NaN	0.67084	0.72611	NaN	0.54465	0.62121	NaN	NaN	0.61705	NaN	0.6861	0.62122	NaN	0.73833	0.69242	NaN	0.75951	NaN	NaN	0.68641	0.66561	NaN	NaN	0.95233	NaN	0.80065	0.95159	NaN	1.0796	NaN	0.82098	NaN	NaN
NaN	NaN	1.1991	NaN	NaN	NaN	NaN	NaN	0.68025	NaN	NaN	1.1546	NaN	NaN	NaN	NaN	NaN	NaN	NaN	NaN	NaN	NaN	NaN	NaN	NaN	NaN	0.77412	NaN	NaN	0.7776	NaN	NaN	NaN	1.0875	NaN	NaN	NaN	NaN	NaN	NaN	NaN	NaN	0.72064	NaN	0.9066	NaN	NaN	NaN	1.4354	NaN
0.96685	0.35609	0.93529	NaN	0.33099	1.0343	NaN	0.37317	0.84224	1.756	0.82259	0.68974	NaN	NaN	0.89534	0.9361	NaN	0.93825	0.79057	1.0196	0.79824	2.4917	NaN	0.97575	0.84797	NaN	1.0384	0.66509	NaN	0.71868	0.68173	NaN	0.90569	0.88409	0.55609	0.80105	1.0482	NaN	0.87929	0.72125	0.52929	0.9254	0.57701	0.4205	0.84303	0.60494	0.81981	NaN	1.0194	0.57267
NaN	NaN	NaN	NaN	NaN	NaN	NaN	NaN	NaN	NaN	NaN	NaN	NaN	NaN	NaN	NaN	NaN	NaN	NaN	NaN	NaN	NaN	NaN	NaN	NaN	NaN	NaN	NaN	NaN	NaN	NaN	NaN	NaN	NaN	NaN	NaN	NaN	NaN	NaN	NaN	NaN	NaN	NaN	NaN	NaN	NaN	NaN	NaN	NaN	NaN
NaN	NaN	NaN	NaN	NaN	NaN	NaN	NaN	NaN	NaN	NaN	NaN	NaN	NaN	NaN	NaN	NaN	NaN	NaN	NaN	NaN	NaN	NaN	NaN	NaN	NaN	NaN	NaN	NaN	NaN	NaN	NaN	NaN	NaN	NaN	NaN	NaN	NaN	NaN	NaN	NaN	NaN	NaN	NaN	NaN	NaN	NaN	NaN	NaN	NaN
NaN	NaN	NaN	NaN	NaN	NaN	NaN	NaN	NaN	NaN	NaN	NaN	NaN	NaN	NaN	NaN	NaN	NaN	NaN	NaN	NaN	NaN	NaN	NaN	NaN	NaN	NaN	NaN	NaN	NaN	NaN	NaN	NaN	NaN	NaN	NaN	NaN	NaN	NaN	NaN	NaN	NaN	NaN	NaN	NaN	NaN	NaN	NaN	NaN	NaN
NaN	NaN	NaN	NaN	NaN	NaN	NaN	NaN	NaN	NaN	NaN	NaN	NaN	NaN	NaN	NaN	NaN	NaN	NaN	NaN	NaN	NaN	NaN	NaN	NaN	NaN	NaN	NaN	NaN	NaN	NaN	NaN	NaN	NaN	NaN	NaN	NaN	NaN	NaN	NaN	NaN	NaN	NaN	NaN	NaN	NaN	NaN	NaN	NaN	NaN
NaN	NaN	NaN	NaN	NaN	NaN	NaN	NaN	NaN	NaN	NaN	NaN	NaN	NaN	NaN	NaN	NaN	NaN	NaN	NaN	NaN	NaN	NaN	NaN	NaN	NaN	NaN	NaN	NaN	NaN	NaN	NaN	NaN	NaN	NaN	NaN	NaN	NaN	NaN	NaN	NaN	NaN	NaN	NaN	NaN	NaN	NaN	NaN	NaN	NaN
NaN	NaN	NaN	NaN	NaN	NaN	NaN	NaN	NaN	NaN	NaN	NaN	NaN	NaN	NaN	NaN	NaN	NaN	NaN	NaN	NaN	NaN	NaN	NaN	NaN	NaN	NaN	NaN	NaN	NaN	NaN	NaN	NaN	NaN	NaN	NaN	NaN	NaN	NaN	NaN	NaN	NaN	NaN	NaN	NaN	NaN	NaN	NaN	NaN	0.73085
0.88364	0.59481	1.1192	0.60857	0.62268	NaN	0.39651	0.59262	NaN	0.72005	0.65036	0.84184	0.62397	0.61072	NaN	0.85866	0.54659	1.3065	0.72977	0.55097	1.0988	0.57267	0.62389	1.0627	0.63659	0.7258	0.95189	0.72672	0.70672	NaN	0.72177	0.73123	NaN	0.84419	0.63588	0.80199	0.58847	0.66638	1.0044	0.77932	0.75683	NaN	0.6726	0.78414	1.207	1.0657	NaN	0.75315	NaN	0.76153
NaN	NaN	NaN	NaN	NaN	NaN	NaN	NaN	NaN	NaN	NaN	NaN	NaN	NaN	NaN	NaN	NaN	NaN	NaN	NaN	NaN	NaN	NaN	NaN	NaN	NaN	NaN	NaN	NaN	NaN	NaN	NaN	NaN	NaN	NaN	NaN	NaN	NaN	NaN	NaN	NaN	NaN	NaN	NaN	NaN	NaN	NaN	NaN	NaN	NaN
NaN	NaN	NaN	NaN	NaN	NaN	NaN	NaN	NaN	NaN	NaN	NaN	NaN	NaN	NaN	NaN	NaN	NaN	NaN	NaN	NaN	NaN	NaN	NaN	NaN	NaN	NaN	NaN	NaN	NaN	NaN	NaN	NaN	NaN	NaN	NaN	NaN	NaN	NaN	NaN	NaN	NaN	NaN	NaN	NaN	NaN	NaN	NaN	NaN	NaN
NaN	NaN	1.1346	NaN	NaN	NaN	NaN	NaN	NaN	NaN	NaN	0.84218	NaN	NaN	NaN	0.81973	NaN	NaN	NaN	NaN	NaN	NaN	NaN	NaN	NaN	NaN	NaN	NaN	NaN	NaN	0.80411	NaN	1.1645	0.73652	NaN	0.82965	0.54867	NaN	NaN	0.52573	NaN	NaN	NaN	NaN	NaN	NaN	NaN	NaN	NaN	NaN
0.93718	0.83282	1.0819	0.6513	0.76226	1.2248	0.41103	0.68031	0.9588	0.7713	0.79809	0.89088	0.66979	0.79706	0.99304	0.87963	0.65718	1.1416	0.73939	0.64142	0.97366	0.65963	0.72089	1.1264	0.76971	0.80342	1.0636	0.79568	0.66443	1.1169	0.80073	0.79108	0.97012	0.81982	0.754	0.97764	0.67637	0.85515	1.144	0.77793	0.86104	1.1413	0.70464	0.85336	1.0376	1.3876	0.75759	0.79649	1.4097	0.83901
NaN	NaN	NaN	NaN	NaN	NaN	NaN	NaN	NaN	NaN	NaN	NaN	NaN	NaN	NaN	NaN	NaN	NaN	NaN	NaN	NaN	NaN	NaN	NaN	NaN	NaN	0.57421	NaN	NaN	NaN	NaN	NaN	NaN	NaN	NaN	NaN	NaN	NaN	NaN	NaN	NaN	NaN	NaN	NaN	NaN	NaN	NaN	NaN	NaN	NaN
0.92855	0.80386	1.1104	0.61832	0.50717	1.1378	0.36164	0.68257	0.87714	1.8952	NaN	0.87579	0.72201	NaN	0.87507	1.1274	NaN	0.89973	0.85787	0.76196	0.71401	1.6898	0.71983	0.9877	0.67054	NaN	0.90527	0.86622	NaN	0.93094	0.77986	0.53694	0.97812	0.81643	0.61011	0.87208	0.66369	NaN	0.88752	0.74784	NaN	1.041	0.54827	0.40804	0.6774	NaN	0.61758	0.46845	1.6332	0.39309
NaN	NaN	NaN	NaN	NaN	NaN	NaN	NaN	NaN	NaN	NaN	NaN	NaN	NaN	NaN	NaN	NaN	NaN	NaN	NaN	NaN	NaN	NaN	NaN	NaN	NaN	NaN	NaN	NaN	NaN	NaN	NaN	NaN	NaN	NaN	NaN	NaN	NaN	NaN	NaN	NaN	NaN	NaN	NaN	NaN	NaN	NaN	NaN	NaN	NaN
NaN	NaN	NaN	NaN	NaN	NaN	NaN	NaN	NaN	NaN	NaN	NaN	NaN	NaN	NaN	NaN	NaN	NaN	NaN	NaN	NaN	NaN	NaN	NaN	NaN	NaN	NaN	NaN	NaN	NaN	NaN	NaN	NaN	NaN	NaN	NaN	NaN	NaN	NaN	NaN	NaN	NaN	NaN	NaN	NaN	NaN	NaN	NaN	NaN	NaN
0.85153	1.0625	0.95115	0.51403	NaN	NaN	0.36422	NaN	0.97946	0.59198	NaN	0.76946	0.70002	NaN	NaN	0.80895	0.9909	0.91744	0.90932	NaN	1.1348	0.69623	0.9619	1.1244	0.9529	0.89262	0.80337	0.82608	NaN	0.71848	0.82606	1.0686	0.96656	0.82744	0.54581	0.95658	0.68633	1.0166	1.1082	0.97961	0.48239	1.1855	0.79381	0.7194	1.0731	NaN	0.70537	0.64674	1.4188	0.74226
NaN	NaN	NaN	NaN	NaN	NaN	NaN	NaN	NaN	NaN	NaN	1.2641	NaN	NaN	1.0368	NaN	NaN	NaN	NaN	NaN	NaN	NaN	NaN	NaN	NaN	NaN	NaN	NaN	NaN	0.95018	NaN	NaN	NaN	NaN	NaN	NaN	NaN	NaN	NaN	NaN	NaN	NaN	NaN	NaN	0.96811	NaN	NaN	NaN	1.412	NaN
1.0457	0.89302	NaN	0.62719	NaN	NaN	NaN	NaN	NaN	2.0368	NaN	1.0255	0.80979	0.57343	NaN	NaN	NaN	NaN	NaN	0.83941	NaN	1.9303	NaN	NaN	0.76642	NaN	NaN	0.81136	NaN	NaN	NaN	NaN	NaN	0.8725	NaN	NaN	NaN	NaN	NaN	NaN	NaN	NaN	NaN	NaN	NaN	NaN	0.56077	NaN	1.3331	NaN
0.9121	0.8251	0.99463	0.76079	0.33313	1.0896	0.23728	0.27564	0.88165	1.7909	0.31048	0.88334	0.42031	0.31911	0.9297	0.64665	0.3277	1.0026	0.55554	0.60865	0.84685	2.302	0.45352	1.0614	0.45097	0.33966	0.89303	0.6279	0.31028	0.8692	0.67989	0.47681	0.95502	0.92066	0.39489	1.0598	0.9726	0.40873	1.0429	0.58087	0.28714	1.0869	0.64751	0.31559	0.87867	0.48516	0.75131	0.3534	1.3978	0.38859
NaN	0.76264	0.94738	0.9009	0.3856	1.1116	0.36081	0.31203	0.85345	1.6724	0.33262	0.71516	NaN	0.32019	0.89864	0.82517	NaN	0.89514	0.56962	0.56592	0.79978	1.8574	0.32125	0.98317	0.4577	NaN	0.78804	NaN	NaN	0.79235	NaN	0.3809	0.92877	NaN	0.29204	0.92162	1.0832	0.33185	0.93966	0.85617	NaN	1.0195	0.77375	0.2068	0.8632	0.81033	0.64045	NaN	1.3199	NaN
0.95597	0.6191	1.1381	0.79446	NaN	0.96823	0.3802	0.39178	0.91005	1.8506	NaN	0.7819	NaN	NaN	0.98409	0.50525	0.35713	1.2099	0.5239	0.97707	NaN	2.2157	0.38469	1.16	NaN	NaN	0.62918	0.78935	NaN	0.76462	0.63959	0.72103	0.98184	1.2194	0.67331	1.1604	0.99672	NaN	1.1665	0.82122	NaN	0.89567	0.66165	NaN	0.84082	0.60593	0.90626	0.44962	1.8255	0.29712
0.90565	0.74129	0.95586	0.67519	0.52742	1.1923	0.35636	0.54248	0.95169	1.8656	0.57983	0.91051	0.83073	0.67536	0.94833	1.1326	0.60653	1.0329	0.94377	0.82884	0.87666	2.2114	0.74537	1.0812	0.74007	0.50287	0.92357	1.0428	0.5941	0.78512	0.86899	0.75602	0.95101	0.76553	0.60141	0.96006	0.68038	0.60575	0.94638	0.65734	0.37833	1.0419	0.58887	0.58202	0.7299	0.57783	0.79405	0.40186	1.2605	0.57514
0.91404	0.65706	0.99914	0.8517	0.25693	1.1472	NaN	0.2767	0.83875	1.2232	NaN	0.735	0.39076	0.29508	0.91661	0.59485	0.53024	0.98512	0.5302	0.45108	0.88368	2.2094	NaN	0.89315	NaN	0.27408	0.77754	0.55006	NaN	0.87625	0.71837	0.31025	0.85896	0.85721	NaN	0.91687	0.73223	NaN	0.86151	0.38507	NaN	0.83408	0.64531	NaN	0.99626	NaN	0.67378	NaN	1.203	NaN
NaN	NaN	NaN	NaN	NaN	NaN	NaN	NaN	NaN	NaN	NaN	NaN	NaN	NaN	NaN	NaN	NaN	NaN	NaN	NaN	NaN	NaN	NaN	NaN	NaN	NaN	NaN	NaN	NaN	NaN	NaN	NaN	NaN	NaN	NaN	NaN	NaN	NaN	NaN	NaN	NaN	NaN	NaN	NaN	NaN	NaN	NaN	NaN	NaN	NaN
NaN	NaN	NaN	NaN	NaN	NaN	NaN	NaN	NaN	NaN	NaN	NaN	NaN	NaN	NaN	NaN	NaN	NaN	NaN	NaN	NaN	NaN	NaN	NaN	NaN	NaN	NaN	NaN	NaN	NaN	NaN	NaN	NaN	NaN	NaN	NaN	NaN	NaN	NaN	NaN	NaN	NaN	NaN	NaN	NaN	NaN	NaN	NaN	NaN	NaN
0.9727	NaN	NaN	NaN	NaN	1.2428	NaN	NaN	NaN	NaN	NaN	NaN	NaN	0.95746	NaN	NaN	NaN	NaN	0.99827	NaN	0.83701	NaN	NaN	NaN	NaN	NaN	NaN	1.236	NaN	NaN	NaN	NaN	NaN	NaN	NaN	NaN	1.2993	NaN	NaN	1.2709	NaN	NaN	NaN	NaN	NaN	0.73939	NaN	NaN	NaN	NaN
0.8931	0.83599	1.0003	0.6996	0.67705	1.183	0.36389	0.58224	0.90169	0.884	0.70665	0.88171	0.57247	0.60602	0.96763	0.77735	0.5914	0.93948	0.6796	0.64257	0.82435	0.89573	0.65237	1.0141	0.69471	0.63175	0.76114	0.69042	0.6039	0.78133	0.68224	0.66363	0.88385	0.75829	0.58495	0.9295	0.76739	0.57924	0.94488	0.79324	0.60003	0.96475	0.72886	0.6894	0.86692	0.9699	0.68955	0.61205	1.2133	0.64507
0.94223	0.77341	1.0079	0.66639	0.64078	1.136	0.3503	0.5753	0.80049	0.81338	0.74006	0.82268	0.59015	0.69499	0.88511	0.84497	0.60192	0.9538	0.68121	0.62731	0.79705	0.83081	0.67194	0.93548	0.67612	0.71668	0.7814	0.68188	0.66132	0.81544	0.70674	0.72754	0.93217	0.79958	0.61265	0.9216	0.74294	0.59936	0.97951	0.77472	0.64145	0.99521	0.72856	0.68072	0.90211	0.87885	0.6137	0.59536	1.165	0.64528
0.77795	0.66327	0.91635	0.63045	0.59256	1.1799	0.29116	0.53738	0.83994	0.82182	0.63441	0.95781	0.55698	0.591	0.81455	0.74981	0.55733	0.89806	0.64375	0.61646	0.74483	0.90355	0.59544	1.0208	0.61699	0.60053	0.77078	0.67223	0.60701	0.78506	0.68037	0.67569	0.91954	0.82141	0.51522	0.81943	0.7118	0.52766	0.88826	0.78787	0.57582	0.85292	0.67407	0.60514	0.73659	0.90885	0.63605	0.53821	1.1175	0.60514
0.78059	0.65957	0.88893	0.60493	0.53503	1.1269	NaN	0.50064	0.66296	0.68825	0.60669	NaN	0.56108	0.61167	NaN	0.73678	0.69345	0.93623	0.65449	0.80821	0.71032	0.58378	0.68573	NaN	0.71648	0.57829	1.0636	0.65639	0.65909	NaN	0.68959	0.68394	NaN	0.78296	NaN	0.96868	0.83871	0.66888	NaN	0.80816	NaN	NaN	0.65639	0.52256	NaN	0.66512	0.68449	0.45723	NaN	0.49908
0.83934	NaN	NaN	0.64199	NaN	NaN	NaN	NaN	NaN	0.77159	NaN	NaN	0.59095	NaN	NaN	0.87566	NaN	NaN	0.66056	NaN	NaN	0.69282	NaN	NaN	0.70673	NaN	NaN	0.62821	NaN	NaN	0.68159	NaN	NaN	0.73204	NaN	NaN	0.66165	NaN	NaN	0.73471	NaN	NaN	0.64601	NaN	NaN	NaN	NaN	NaN	NaN	NaN
0.65243	0.783	1.0219	0.56558	0.25392	1.0373	NaN	NaN	0.92174	1.888	NaN	0.74958	NaN	NaN	0.7505	0.5041	NaN	0.88878	0.61042	0.86712	0.53961	1.8114	NaN	0.95481	NaN	NaN	0.71906	0.49259	0.20338	0.6539	0.59498	NaN	0.96948	0.81344	0.19431	0.94429	1.1075	NaN	0.89624	0.55802	NaN	0.84286	0.59312	0.16899	0.89112	NaN	0.82022	NaN	1.1357	NaN
0.98662	0.71737	0.97671	0.86365	0.61834	1.1322	0.19956	0.49814	0.79831	1.8457	0.39984	0.74475	0.43555	0.60153	0.81311	0.67241	0.4993	0.80572	0.56925	0.89889	0.77293	2.4121	0.27709	0.88809	0.19311	NaN	0.76481	0.60973	NaN	0.60377	0.60439	0.39701	0.84729	0.96108	0.43762	0.83537	1.238	0.49098	0.8353	0.65212	0.24069	0.85459	0.59216	0.34085	0.71968	0.42167	0.66025	0.33219	1.1689	0.48974
1.0626	NaN	0.98188	0.86568	NaN	1.0928	NaN	NaN	0.95187	1.5319	NaN	0.82949	0.40112	NaN	0.77214	0.69543	NaN	0.84595	0.5576	NaN	0.77484	2.9317	NaN	0.93401	NaN	NaN	0.71615	0.67698	NaN	NaN	0.6028	NaN	0.85887	0.94245	NaN	0.73992	1.2378	NaN	0.84766	0.67005	NaN	0.94637	0.70279	NaN	0.84817	NaN	0.61296	NaN	1.3377	NaN
0.95844	0.91997	1.0287	0.65384	0.79837	1.0391	0.47157	NaN	0.87968	1.2137	0.93641	0.80066	0.74672	0.62149	0.74615	1.0561	0.90178	0.76516	0.72089	0.62116	0.79173	0.80983	0.7376	0.84318	0.6672	0.58949	0.711	0.66894	0.97771	0.64663	0.73553	0.67445	0.7517	0.77233	NaN	0.66664	0.91911	0.61322	0.8582	0.9556	0.3531	0.91788	0.84547	NaN	0.82072	0.93269	0.64341	0.4353	1.0013	NaN
1.0074	NaN	NaN	NaN	NaN	NaN	NaN	NaN	NaN	1.5653	NaN	NaN	NaN	NaN	NaN	NaN	NaN	NaN	NaN	NaN	NaN	2.1836	NaN	NaN	NaN	NaN	NaN	0.77672	NaN	NaN	0.81787	NaN	NaN	1.2047	NaN	NaN	0.82969	NaN	NaN	0.71225	NaN	NaN	0.91722	NaN	NaN	NaN	NaN	NaN	NaN	NaN
0.82171	0.63296	1.0767	0.64381	0.22138	1.2115	NaN	0.16143	0.90498	1.7275	0.18426	0.72027	0.31941	0.19481	0.90061	0.58499	0.2225	0.86235	0.43208	0.7709	0.83328	2.3307	0.22497	1.0013	0.16957	0.10891	0.71115	0.47673	0.16578	0.69057	0.53437	0.25269	0.85148	0.81692	NaN	0.93603	1.0149	0.29084	0.90966	0.51698	0.13267	0.92618	0.59706	0.15845	0.76573	0.25676	0.65392	0.19142	1.151	0.22454
0.87811	0.72744	1.0277	0.66672	0.57724	1.0991	0.32435	0.51727	0.84567	0.79009	0.64632	0.82461	0.54138	0.56424	0.8733	0.86036	0.56271	1.0157	0.62555	0.43311	0.79446	0.76477	0.65751	1.0217	0.72709	0.59021	0.7941	0.68705	0.56288	0.73993	0.67469	0.63637	0.81937	0.72399	0.69838	1.0097	0.69265	0.59917	0.90711	0.77908	0.54927	1.0225	0.69412	0.77314	0.9011	0.85908	0.71213	0.5575	1.1356	0.53778
NaN	NaN	1.1411	NaN	NaN	NaN	0.33955	NaN	0.68447	NaN	NaN	NaN	0.59407	NaN	0.80804	NaN	NaN	NaN	NaN	NaN	NaN	NaN	NaN	NaN	NaN	NaN	0.65119	NaN	NaN	NaN	NaN	NaN	0.96973	NaN	NaN	NaN	0.44793	NaN	NaN	NaN	NaN	0.75529	NaN	NaN	0.72943	NaN	NaN	NaN	NaN	NaN
NaN	NaN	NaN	NaN	0.65115	NaN	NaN	NaN	NaN	NaN	NaN	NaN	NaN	NaN	NaN	NaN	NaN	NaN	NaN	NaN	NaN	NaN	NaN	NaN	NaN	NaN	NaN	NaN	NaN	NaN	NaN	NaN	NaN	NaN	NaN	NaN	NaN	0.9828	NaN	NaN	NaN	NaN	NaN	NaN	NaN	NaN	NaN	NaN	NaN	0.57766
0.7935	0.84989	NaN	NaN	0.84725	NaN	0.47352	0.70721	NaN	NaN	0.65178	0.90045	0.39606	0.5927	1.1182	0.73311	NaN	NaN	0.70037	0.6667	NaN	1.0099	0.49013	1.024	0.53589	0.68045	0.76961	0.73021	0.68474	NaN	0.90752	NaN	NaN	0.68562	NaN	NaN	0.8432	NaN	0.70847	NaN	NaN	NaN	0.68977	NaN	0.67578	NaN	0.63813	NaN	1.6494	0.43313
0.77886	0.6956	NaN	0.53118	0.77161	NaN	NaN	0.61128	0.84928	0.65725	0.60809	NaN	0.4977	0.64897	NaN	0.78406	0.73164	NaN	0.59258	NaN	NaN	0.54591	0.7795	NaN	0.60298	NaN	NaN	0.61939	0.593	NaN	0.69839	NaN	NaN	0.61778	0.63002	1.0292	0.59608	0.60234	0.89927	0.62789	NaN	1.1011	0.61418	NaN	NaN	0.7998	0.67918	0.35177	NaN	NaN
NaN	NaN	NaN	NaN	NaN	NaN	NaN	NaN	NaN	NaN	NaN	NaN	NaN	NaN	NaN	NaN	NaN	NaN	NaN	NaN	NaN	NaN	NaN	NaN	NaN	NaN	NaN	NaN	NaN	NaN	NaN	NaN	NaN	NaN	NaN	NaN	NaN	NaN	NaN	NaN	NaN	NaN	NaN	NaN	NaN	NaN	NaN	NaN	NaN	NaN
0.88584	0.82678	0.94445	0.6695	0.70905	1.2034	0.41633	0.67687	0.84261	0.76243	0.6723	0.9738	0.69028	0.74677	0.99008	0.9045	0.65147	0.99866	0.76329	0.57739	0.8925	0.65504	0.69579	0.97439	0.79266	0.67664	0.77075	0.75846	0.63564	0.84735	0.83386	0.74388	0.94447	0.71398	0.62876	1.0422	0.66569	0.69099	0.98581	0.7705	0.70276	1.0606	0.731	0.82388	0.90498	1.0399	0.69591	0.77346	1.5723	0.70595
0.85967	0.86541	0.92195	0.63892	0.77239	1.1534	0.33971	0.81072	0.76718	NaN	0.66708	0.81578	0.61464	0.6397	0.98194	0.84227	0.59217	1.0218	0.72619	0.56981	0.90993	0.44974	0.79253	1.0259	0.56292	0.73962	0.76206	0.73683	0.54816	0.77339	0.65462	0.76741	0.91468	1.0057	0.63822	1.1052	0.54399	0.72876	0.95658	0.86678	0.65742	1.0472	0.7851	0.75996	0.92589	1.0486	0.75644	0.74207	1.3383	0.94583
1.5228	0.68153	NaN	NaN	0.87365	1.0713	NaN	0.75268	0.84569	0.67536	0.67445	0.87117	0.7035	0.75775	NaN	0.78019	0.60132	0.8273	NaN	0.65936	0.86652	0.82371	0.92385	0.94501	NaN	1.077	NaN	NaN	0.62857	1.1606	NaN	0.75247	NaN	0.8361	0.8472	1.0515	0.70428	0.91263	NaN	0.95964	0.61446	1.0521	0.49977	0.67847	1.3917	1.154	0.76779	NaN	1.24	0.67039
NaN	NaN	NaN	NaN	NaN	NaN	NaN	NaN	NaN	NaN	NaN	NaN	NaN	NaN	NaN	NaN	NaN	NaN	NaN	NaN	NaN	NaN	NaN	NaN	NaN	NaN	NaN	NaN	NaN	NaN	NaN	NaN	NaN	NaN	NaN	NaN	NaN	NaN	NaN	NaN	NaN	NaN	NaN	NaN	NaN	NaN	NaN	NaN	NaN	NaN
0.87843	0.54252	NaN	0.71099	NaN	NaN	0.26924	NaN	0.77149	0.62865	0.76145	0.70193	0.63037	NaN	NaN	0.83814	0.83236	NaN	0.84196	NaN	NaN	0.63099	0.78852	NaN	0.76515	0.94019	NaN	0.81633	0.73879	NaN	0.72085	0.72175	NaN	0.71048	NaN	0.88673	0.72991	0.6516	NaN	0.91107	0.49056	0.92964	0.8047	0.52827	NaN	1.1294	NaN	NaN	1.2298	NaN
NaN	NaN	NaN	NaN	NaN	NaN	NaN	NaN	NaN	NaN	NaN	NaN	NaN	NaN	NaN	NaN	NaN	NaN	NaN	NaN	NaN	NaN	NaN	NaN	NaN	NaN	NaN	NaN	NaN	NaN	NaN	NaN	NaN	NaN	NaN	NaN	NaN	NaN	NaN	NaN	NaN	NaN	NaN	NaN	NaN	NaN	NaN	NaN	NaN	NaN
NaN	NaN	NaN	NaN	0.58428	NaN	0.38213	NaN	NaN	NaN	NaN	NaN	NaN	NaN	NaN	0.90761	NaN	NaN	NaN	NaN	NaN	NaN	NaN	NaN	NaN	NaN	NaN	NaN	NaN	NaN	0.79371	NaN	NaN	0.89553	NaN	NaN	NaN	0.67108	NaN	NaN	0.76077	NaN	NaN	NaN	NaN	NaN	NaN	NaN	NaN	NaN
0.86389	0.63961	NaN	0.5656	NaN	1.409	0.2644	0.76629	NaN	0.71388	NaN	NaN	0.76172	NaN	NaN	0.84485	0.6407	NaN	0.69981	NaN	NaN	0.66722	0.72312	NaN	0.82855	NaN	NaN	0.76113	0.60161	NaN	0.86793	NaN	NaN	0.7597	NaN	NaN	0.63983	0.9735	NaN	0.74901	NaN	NaN	0.64679	NaN	NaN	NaN	NaN	NaN	NaN	NaN
NaN	NaN	NaN	NaN	NaN	NaN	NaN	NaN	NaN	0.73269	NaN	NaN	0.63427	NaN	NaN	NaN	NaN	NaN	NaN	NaN	NaN	NaN	NaN	NaN	0.64016	NaN	NaN	NaN	NaN	NaN	NaN	NaN	NaN	0.83872	NaN	NaN	NaN	NaN	NaN	NaN	NaN	NaN	NaN	NaN	NaN	NaN	NaN	NaN	NaN	NaN
0.66653	NaN	NaN	0.55983	0.60305	0.93986	0.30195	0.54564	NaN	0.65051	0.58782	NaN	0.5122	NaN	NaN	0.74297	0.51345	NaN	0.59826	NaN	0.91279	NaN	0.61871	NaN	0.60586	NaN	NaN	NaN	0.54773	NaN	0.64642	NaN	NaN	0.72225	NaN	NaN	NaN	NaN	NaN	NaN	NaN	NaN	NaN	NaN	NaN	NaN	NaN	NaN	NaN	0.39864
NaN	NaN	NaN	NaN	NaN	NaN	NaN	NaN	NaN	NaN	NaN	NaN	NaN	NaN	NaN	NaN	NaN	NaN	NaN	NaN	NaN	NaN	NaN	NaN	NaN	NaN	NaN	NaN	NaN	NaN	NaN	NaN	NaN	NaN	NaN	NaN	NaN	NaN	NaN	NaN	NaN	NaN	NaN	NaN	NaN	NaN	NaN	NaN	NaN	NaN
1.4214	NaN	NaN	0.53655	NaN	NaN	0.60095	NaN	NaN	0.88021	0.66252	NaN	0.72354	NaN	NaN	0.90887	NaN	NaN	1.4782	NaN	NaN	0.71769	0.57034	NaN	0.73355	0.57757	NaN	NaN	0.97391	NaN	0.88092	NaN	NaN	1.1362	0.55268	NaN	NaN	NaN	1.1803	NaN	NaN	NaN	NaN	0.74218	NaN	0.99977	NaN	0.73049	NaN	0.79151
0.83732	0.77493	0.92253	0.49647	0.84488	1.2494	0.34588	0.67524	0.65289	0.52509	0.60963	0.9254	0.56245	0.73595	0.90043	0.7945	0.64215	0.87323	0.57745	0.58941	0.88823	0.52553	0.77389	0.95406	0.66169	0.73543	0.96391	0.64084	0.58133	0.90695	0.73629	0.72598	0.92417	0.73314	0.60601	0.9192	0.56976	0.66682	0.89135	0.71777	0.52359	0.98685	0.67971	0.69832	0.86823	0.90788	0.73417	0.47799	1.1768	0.64239
1.0189	NaN	NaN	NaN	0.83415	NaN	NaN	0.78025	NaN	NaN	NaN	NaN	NaN	0.73181	NaN	NaN	NaN	NaN	NaN	NaN	NaN	NaN	0.98732	NaN	NaN	0.89548	NaN	NaN	NaN	NaN	0.90889	NaN	NaN	0.59867	0.56462	NaN	0.89747	0.87443	NaN	0.808	0.46318	NaN	0.62547	NaN	NaN	NaN	NaN	0.83548	NaN	0.49113
0.90168	0.95393	0.95692	0.53985	0.81049	1.2125	0.31088	0.70862	NaN	0.65652	0.6513	0.80943	0.65113	0.7264	1.3721	0.92566	0.57602	0.98446	0.61238	0.58991	0.94157	0.59826	0.77429	0.96691	0.79116	0.70703	0.97226	0.7155	0.57724	0.86729	0.81605	0.79836	0.98248	0.79373	0.52229	1.0686	0.61612	0.79148	1.0661	0.74877	0.83604	0.96611	0.69915	0.52522	0.91296	1.1513	NaN	0.73535	NaN	0.64918
NaN	NaN	NaN	NaN	NaN	NaN	NaN	NaN	NaN	NaN	NaN	NaN	NaN	NaN	NaN	NaN	NaN	NaN	NaN	NaN	NaN	NaN	NaN	NaN	NaN	NaN	NaN	NaN	NaN	NaN	NaN	NaN	NaN	NaN	NaN	NaN	NaN	NaN	NaN	NaN	NaN	NaN	NaN	NaN	NaN	NaN	NaN	NaN	NaN	NaN
NaN	NaN	NaN	NaN	NaN	NaN	NaN	NaN	NaN	NaN	NaN	NaN	NaN	NaN	NaN	NaN	NaN	NaN	NaN	NaN	NaN	NaN	NaN	NaN	NaN	NaN	NaN	NaN	NaN	NaN	NaN	NaN	NaN	NaN	NaN	NaN	NaN	NaN	NaN	NaN	NaN	NaN	NaN	NaN	NaN	NaN	NaN	NaN	NaN	NaN
0.70222	0.65877	1.0548	0.48619	NaN	1.1581	NaN	0.51357	0.90041	NaN	NaN	0.88241	NaN	0.60955	1.0009	1.1628	0.60783	0.97541	0.75937	NaN	0.83401	NaN	0.69205	0.98565	NaN	NaN	0.78831	NaN	0.59804	0.6575	NaN	NaN	0.91145	NaN	0.51493	NaN	NaN	0.69785	1.0068	NaN	0.43443	0.99892	NaN	0.36043	0.7807	0.66453	1.021	0.39241	1.2582	NaN
0.97846	0.78867	0.96986	0.64482	0.76709	1.1724	0.41257	0.66074	0.99137	0.88905	0.61382	0.67509	0.66369	0.65576	0.96526	0.82657	0.64162	0.67591	0.64985	0.62596	0.82641	0.69846	0.69673	0.86018	0.71498	0.73815	0.73605	0.64473	0.63259	0.75955	0.75996	0.80073	0.97528	0.70148	0.71239	0.85001	0.39789	0.60203	0.59454	0.45335	0.56061	0.56679	0.41546	0.56472	0.33538	0.5724	0.25697	0.43444	0.32095	0.30631
NaN	0.98791	NaN	NaN	NaN	1.1579	NaN	0.77851	0.78013	0.64661	NaN	NaN	NaN	NaN	0.83146	1.406	NaN	0.96554	0.8697	NaN	NaN	NaN	1.0149	0.99705	0.98435	NaN	NaN	0.58877	NaN	0.77167	0.76261	NaN	NaN	NaN	0.76224	0.89984	NaN	0.95911	0.90933	NaN	NaN	NaN	0.73733	0.82133	NaN	NaN	1.3619	NaN	1.126	0.62735
NaN	NaN	NaN	NaN	0.66406	NaN	NaN	NaN	NaN	NaN	NaN	NaN	NaN	NaN	NaN	NaN	NaN	NaN	NaN	NaN	NaN	NaN	NaN	NaN	NaN	NaN	NaN	NaN	NaN	NaN	NaN	NaN	NaN	0.9769	NaN	NaN	NaN	NaN	NaN	NaN	NaN	NaN	NaN	NaN	NaN	NaN	NaN	NaN	NaN	NaN
NaN	NaN	NaN	NaN	NaN	NaN	NaN	NaN	NaN	NaN	NaN	NaN	NaN	NaN	NaN	NaN	NaN	NaN	NaN	NaN	NaN	NaN	NaN	NaN	NaN	NaN	NaN	NaN	NaN	NaN	NaN	NaN	NaN	NaN	NaN	NaN	NaN	NaN	NaN	NaN	NaN	NaN	NaN	NaN	NaN	NaN	NaN	NaN	NaN	NaN
0.86546	0.71227	1.0225	0.64022	0.60963	1.0818	0.33955	0.64969	0.85304	0.61293	0.59343	0.73391	0.59936	0.60047	0.84713	0.85413	0.64918	0.82341	0.7585	0.50869	0.76882	0.55517	0.69665	0.87171	0.90759	0.63246	0.81246	0.65578	0.52482	0.81708	0.85617	0.7499	0.88092	0.8693	0.42897	0.92878	0.62186	0.65819	0.914	0.7946	0.56224	0.89801	0.71547	0.65893	0.77716	0.9593	0.4695	0.65849	1.1587	0.63613
NaN	NaN	NaN	NaN	NaN	NaN	NaN	NaN	NaN	NaN	NaN	NaN	NaN	NaN	NaN	NaN	NaN	NaN	NaN	NaN	NaN	NaN	NaN	NaN	NaN	NaN	NaN	NaN	NaN	NaN	NaN	NaN	NaN	NaN	NaN	NaN	NaN	NaN	NaN	NaN	NaN	NaN	NaN	NaN	NaN	NaN	NaN	NaN	NaN	NaN
NaN	NaN	NaN	NaN	NaN	NaN	NaN	NaN	NaN	NaN	NaN	NaN	NaN	NaN	NaN	NaN	NaN	NaN	NaN	NaN	NaN	NaN	NaN	NaN	NaN	NaN	NaN	NaN	NaN	NaN	NaN	NaN	NaN	NaN	NaN	NaN	NaN	NaN	NaN	NaN	NaN	NaN	NaN	NaN	NaN	NaN	NaN	NaN	NaN	NaN
NaN	NaN	NaN	NaN	NaN	NaN	NaN	NaN	NaN	NaN	NaN	NaN	NaN	NaN	NaN	NaN	NaN	NaN	NaN	NaN	NaN	NaN	NaN	NaN	NaN	NaN	NaN	NaN	NaN	NaN	NaN	NaN	NaN	NaN	NaN	NaN	NaN	NaN	NaN	NaN	NaN	NaN	NaN	NaN	NaN	NaN	NaN	NaN	NaN	NaN
NaN	NaN	NaN	NaN	NaN	NaN	NaN	NaN	NaN	NaN	NaN	NaN	NaN	NaN	NaN	NaN	NaN	NaN	NaN	0.51225	NaN	NaN	NaN	NaN	NaN	NaN	NaN	NaN	NaN	NaN	NaN	NaN	NaN	NaN	NaN	NaN	NaN	NaN	NaN	NaN	NaN	NaN	NaN	NaN	NaN	0.85404	NaN	NaN	NaN	NaN
0.95527	0.69334	NaN	0.7618	0.74298	1.1525	0.39937	0.57289	NaN	0.83994	0.58525	NaN	0.60312	0.64251	0.88512	0.91986	0.56014	0.9739	0.96186	0.5374	0.71605	0.67961	0.69865	0.83626	0.85202	0.74217	0.51932	0.79465	0.54102	0.65323	0.89887	0.74462	0.89436	0.86688	0.67419	0.89881	0.69904	0.71071	0.87427	0.87318	0.55991	0.86394	0.82034	0.72797	0.85192	0.96699	0.71377	0.72153	1.1827	0.61856
0.79911	0.70971	0.96037	0.64971	0.89541	0.87002	0.34504	0.67282	0.94319	0.64239	0.74909	0.85611	0.72484	0.70248	0.81611	0.74492	0.69659	0.90968	0.74324	0.71261	0.86434	0.59353	0.88414	0.97023	0.7096	0.76823	0.89273	0.61018	0.70051	0.84516	0.8403	0.89132	0.81328	0.69623	0.83272	1.0201	0.64162	0.86791	0.97142	0.7188	1.026	1.0145	0.71698	1.3424	1.0574	1.1918	0.67489	1.328	1.275	1.0522
0.91631	0.74161	1.0306	0.63877	0.77447	1.0846	0.42652	0.63801	0.80578	0.68436	0.61497	0.89788	0.6855	0.70929	1.3568	0.9868	0.61996	1.1063	0.80121	0.60914	0.85514	0.57669	0.67663	0.98925	0.781	0.68532	0.7873	0.82369	0.64226	0.85769	0.83151	0.85422	1.0425	0.92153	0.7748	1.3972	0.73288	0.7845	1.037	0.91373	0.7244	1.0528	0.90585	0.98652	1.0078	1.1664	1.0825	0.89642	1.6359	1.1281
NaN	NaN	NaN	NaN	NaN	NaN	NaN	NaN	NaN	NaN	NaN	NaN	NaN	NaN	NaN	NaN	NaN	NaN	NaN	NaN	NaN	NaN	NaN	NaN	NaN	NaN	NaN	NaN	NaN	NaN	NaN	NaN	NaN	NaN	NaN	NaN	NaN	NaN	NaN	NaN	NaN	NaN	NaN	NaN	NaN	NaN	NaN	NaN	NaN	NaN
NaN	NaN	NaN	NaN	NaN	NaN	NaN	NaN	NaN	NaN	NaN	NaN	NaN	NaN	NaN	NaN	NaN	NaN	NaN	NaN	NaN	NaN	NaN	NaN	NaN	NaN	NaN	NaN	NaN	NaN	NaN	NaN	NaN	NaN	NaN	NaN	NaN	NaN	NaN	NaN	NaN	NaN	NaN	NaN	NaN	NaN	NaN	NaN	NaN	NaN
0.95666	0.67439	1.0758	0.54294	0.70062	1.3216	0.29043	0.65814	0.81838	0.50988	0.55124	1.0856	0.64304	0.63959	1.0071	0.75965	0.6433	0.95204	0.64159	0.59829	0.7134	0.58417	0.68369	NaN	0.77455	0.68225	1.0136	0.74262	0.61361	1.1393	0.69764	0.76887	0.95226	0.70954	0.49077	NaN	0.56503	0.72455	1.037	0.79533	0.51354	1.1337	0.67855	0.60877	NaN	0.82762	0.92056	0.50793	NaN	0.6337
0.92237	NaN	NaN	NaN	NaN	NaN	NaN	NaN	NaN	NaN	NaN	NaN	NaN	NaN	NaN	NaN	NaN	NaN	1.5928	NaN	NaN	NaN	NaN	NaN	NaN	NaN	NaN	NaN	NaN	NaN	NaN	NaN	NaN	NaN	NaN	NaN	NaN	NaN	NaN	NaN	NaN	NaN	NaN	NaN	NaN	NaN	NaN	NaN	NaN	NaN
0.76005	0.70343	0.96134	0.48188	0.65562	0.91589	0.35787	0.61868	1.0689	0.61882	0.62839	1.2336	0.49543	0.71251	NaN	0.81302	0.70016	NaN	0.58117	1.3023	0.89603	0.59929	0.78318	NaN	0.65057	0.619	NaN	0.70684	0.63367	NaN	0.73571	0.68452	NaN	0.70395	0.59922	NaN	0.58057	0.67964	NaN	0.83861	0.93441	NaN	0.71237	0.66918	NaN	0.89517	NaN	0.59005	NaN	0.66176
NaN	NaN	NaN	NaN	NaN	NaN	NaN	NaN	NaN	NaN	NaN	NaN	NaN	NaN	NaN	NaN	NaN	NaN	NaN	NaN	NaN	NaN	NaN	NaN	NaN	NaN	NaN	NaN	NaN	NaN	NaN	NaN	NaN	NaN	NaN	NaN	NaN	NaN	NaN	NaN	NaN	NaN	NaN	NaN	NaN	NaN	NaN	NaN	NaN	NaN
0.86715	0.64902	0.99119	0.82031	0.63602	0.86919	0.38523	0.60317	1.2345	0.8062	0.60103	0.81336	0.62848	0.60478	0.86319	0.78007	0.59603	0.8305	0.88273	0.56244	0.86583	1.0014	0.63486	1.0496	0.71648	0.62771	0.97085	0.37375	0.5345	0.70743	0.27559	0.60772	0.93383	0.1975	0.11271	0.9975	0.23384	0.21274	0.84137	0.3085	0.11671	1.1471	0.33033	0.26342	0.62624	0.3751	0.63707	0.32326	1.2346	0.58759
NaN	NaN	NaN	NaN	NaN	NaN	NaN	NaN	NaN	1.0096	NaN	NaN	NaN	NaN	NaN	NaN	NaN	NaN	NaN	NaN	NaN	NaN	NaN	NaN	0.94415	NaN	NaN	NaN	NaN	NaN	0.9402	NaN	NaN	NaN	NaN	NaN	0.90899	NaN	NaN	NaN	NaN	NaN	NaN	NaN	NaN	NaN	NaN	NaN	NaN	NaN
0.92063	0.74263	1.0095	0.66273	0.56102	1.0185	0.34712	0.53407	0.89363	0.97838	0.50793	1.023	0.56398	0.52015	0.87852	0.78155	0.55191	0.90176	0.70574	0.62823	0.78705	1.0731	0.60466	0.89244	0.65953	0.57629	0.90869	0.67422	0.48061	0.71972	0.77922	0.68457	0.87863	0.83951	0.60991	0.99322	0.7543	0.62073	0.875	0.70047	0.54338	1.0445	0.69909	0.65389	0.82756	0.97792	0.85964	0.67607	1.1388	0.64947
NaN	NaN	NaN	NaN	NaN	NaN	NaN	NaN	0.87173	0.74911	NaN	1.0087	NaN	0.75845	NaN	0.67673	0.62577	NaN	NaN	0.82105	NaN	NaN	0.86818	NaN	0.58977	NaN	NaN	NaN	NaN	0.88123	0.60106	0.89111	1.0348	0.63656	0.61265	NaN	NaN	NaN	NaN	NaN	NaN	NaN	NaN	NaN	1.0253	NaN	NaN	NaN	NaN	NaN
NaN	NaN	NaN	NaN	NaN	NaN	NaN	NaN	NaN	NaN	NaN	NaN	NaN	NaN	NaN	NaN	NaN	NaN	NaN	NaN	NaN	0.67241	NaN	NaN	NaN	NaN	NaN	NaN	NaN	NaN	NaN	NaN	NaN	NaN	NaN	NaN	NaN	NaN	NaN	NaN	NaN	NaN	NaN	NaN	NaN	NaN	NaN	NaN	NaN	NaN
1.1003	NaN	0.9575	0.54438	NaN	1.0314	NaN	0.44179	1.0054	2.5606	NaN	1.0515	NaN	0.706	0.8476	0.85209	0.5	0.88154	0.91815	0.56872	0.89297	2.8793	0.74766	1.137	0.90444	0.58337	0.91784	0.86186	NaN	0.83744	0.88362	0.80008	1.0188	0.74202	0.55598	1.0056	1.0162	0.70133	1.0595	0.90918	0.61594	0.97755	0.86769	0.45017	NaN	1.2296	0.60251	0.5745	1.5097	0.74563
0.70133	1.3232	1.0085	0.67527	0.63998	1.2983	0.48152	0.6403	0.97894	1.3514	0.62763	0.59833	0.71956	0.66803	0.86095	1.1483	NaN	0.80699	0.52445	0.80121	0.90432	2.3001	0.79658	0.9138	0.98179	0.46428	0.46797	0.81528	0.37611	0.27843	0.66067	0.78964	0.69914	0.82221	NaN	0.94196	0.78907	0.75282	0.87255	0.96946	NaN	0.91913	0.85494	0.49062	0.56759	0.89684	0.79589	0.73348	0.98897	0.69635
NaN	NaN	NaN	NaN	NaN	NaN	NaN	NaN	NaN	NaN	NaN	NaN	NaN	NaN	NaN	NaN	NaN	NaN	NaN	NaN	NaN	NaN	0.60386	NaN	NaN	0.62579	NaN	NaN	NaN	NaN	NaN	NaN	NaN	NaN	NaN	NaN	NaN	NaN	NaN	NaN	NaN	NaN	NaN	0.91871	NaN	NaN	NaN	NaN	NaN	NaN
NaN	NaN	NaN	NaN	NaN	NaN	NaN	NaN	NaN	NaN	NaN	NaN	NaN	NaN	NaN	NaN	NaN	NaN	NaN	NaN	NaN	NaN	NaN	NaN	NaN	NaN	NaN	NaN	NaN	NaN	NaN	NaN	NaN	NaN	NaN	NaN	NaN	NaN	NaN	NaN	NaN	NaN	NaN	NaN	NaN	NaN	NaN	NaN	NaN	NaN
0.81594	0.68655	1.1548	0.77409	0.92839	0.92481	0.33772	0.8178	0.64504	0.48718	0.75904	0.75193	0.64521	0.69612	0.73192	NaN	0.77307	0.9677	NaN	0.74054	0.89306	0.61066	0.79584	0.81349	0.59068	0.74956	1.096	0.71932	0.72678	0.9678	1.0227	0.97823	0.82604	0.91661	0.53075	0.64794	0.83846	0.75233	0.93142	0.86584	0.68277	0.93922	0.83728	0.63235	0.91774	1.0448	0.79941	0.66903	1.2664	0.62864
0.90823	NaN	0.98272	0.65472	0.98911	1.6642	0.31411	0.74601	NaN	0.76807	NaN	NaN	0.70461	0.70719	0.82098	0.73441	NaN	NaN	0.97239	NaN	NaN	0.72912	NaN	NaN	0.80359	NaN	NaN	0.64258	NaN	0.7437	0.65934	NaN	NaN	0.74326	NaN	NaN	0.85231	NaN	NaN	0.83949	NaN	1.2173	0.72491	NaN	0.88892	NaN	NaN	NaN	1.098	NaN
0.99238	0.90116	0.89299	0.61867	0.52692	1.0282	0.42656	1.0065	0.88397	0.72191	0.66442	0.78357	0.48065	0.48044	0.78213	0.8793	0.74149	0.82158	0.74935	0.59465	0.80898	0.5053	0.52497	0.93391	0.82779	0.51401	0.78042	0.63475	0.63873	0.6447	0.83167	0.61818	0.77655	0.70786	0.83131	0.87539	0.70268	0.59307	1.0355	0.95031	1.0159	0.90682	0.80886	1.1673	0.9819	0.87284	0.66915	1.2205	1.143	0.76927
NaN	NaN	NaN	NaN	NaN	NaN	NaN	NaN	NaN	NaN	NaN	NaN	NaN	NaN	NaN	NaN	NaN	NaN	NaN	NaN	NaN	NaN	NaN	NaN	NaN	NaN	NaN	NaN	NaN	NaN	NaN	NaN	NaN	NaN	NaN	NaN	NaN	NaN	NaN	NaN	NaN	NaN	NaN	NaN	NaN	NaN	NaN	NaN	NaN	NaN
NaN	NaN	NaN	NaN	NaN	NaN	NaN	NaN	NaN	NaN	NaN	NaN	NaN	NaN	NaN	NaN	NaN	0.98634	NaN	NaN	NaN	NaN	NaN	1.0969	NaN	NaN	NaN	NaN	NaN	0.84121	NaN	NaN	NaN	NaN	NaN	0.97094	NaN	NaN	0.73179	NaN	NaN	1.0502	NaN	NaN	NaN	NaN	0.80219	NaN	1.2931	NaN
NaN	NaN	NaN	NaN	NaN	NaN	NaN	NaN	NaN	NaN	NaN	NaN	NaN	NaN	NaN	NaN	NaN	NaN	NaN	NaN	NaN	NaN	NaN	NaN	NaN	NaN	NaN	NaN	NaN	NaN	NaN	NaN	NaN	NaN	NaN	NaN	NaN	NaN	NaN	NaN	NaN	NaN	NaN	NaN	NaN	NaN	NaN	NaN	NaN	NaN
NaN	0.92811	1.1482	NaN	0.76168	NaN	NaN	0.72499	NaN	NaN	0.65963	NaN	NaN	0.74699	NaN	NaN	0.66132	NaN	1.8534	0.47262	0.93366	NaN	0.61257	NaN	1.0128	0.71498	NaN	NaN	0.62011	NaN	0.92117	NaN	NaN	0.95994	0.75966	NaN	1.1813	NaN	NaN	0.91463	0.73191	NaN	0.83905	0.90877	NaN	1.1811	NaN	0.82982	1.144	0.8312
NaN	NaN	NaN	NaN	NaN	NaN	NaN	NaN	NaN	NaN	NaN	NaN	NaN	NaN	NaN	NaN	NaN	NaN	NaN	NaN	NaN	NaN	NaN	NaN	NaN	NaN	NaN	NaN	NaN	NaN	NaN	NaN	NaN	NaN	NaN	NaN	NaN	NaN	NaN	NaN	NaN	NaN	NaN	NaN	NaN	NaN	NaN	NaN	NaN	NaN
NaN	NaN	NaN	NaN	NaN	NaN	NaN	NaN	NaN	NaN	NaN	NaN	NaN	NaN	NaN	NaN	NaN	NaN	NaN	NaN	NaN	NaN	NaN	NaN	NaN	NaN	NaN	NaN	NaN	NaN	NaN	NaN	NaN	NaN	NaN	NaN	NaN	NaN	NaN	NaN	NaN	NaN	NaN	NaN	NaN	NaN	NaN	NaN	NaN	NaN
NaN	NaN	NaN	NaN	NaN	NaN	NaN	NaN	NaN	NaN	NaN	NaN	NaN	NaN	NaN	NaN	NaN	NaN	NaN	NaN	NaN	NaN	NaN	NaN	NaN	NaN	NaN	NaN	NaN	NaN	NaN	NaN	NaN	NaN	NaN	NaN	NaN	NaN	NaN	NaN	NaN	NaN	NaN	NaN	NaN	NaN	NaN	NaN	NaN	NaN
NaN	NaN	NaN	NaN	NaN	NaN	NaN	NaN	NaN	NaN	NaN	NaN	NaN	NaN	NaN	NaN	NaN	NaN	0.87641	NaN	NaN	NaN	NaN	NaN	NaN	NaN	NaN	NaN	NaN	NaN	NaN	NaN	NaN	NaN	NaN	NaN	NaN	NaN	NaN	NaN	NaN	NaN	NaN	NaN	NaN	NaN	NaN	NaN	NaN	NaN
NaN	NaN	NaN	NaN	NaN	NaN	NaN	NaN	NaN	NaN	NaN	NaN	NaN	NaN	NaN	NaN	NaN	NaN	NaN	NaN	NaN	NaN	NaN	NaN	NaN	NaN	NaN	NaN	NaN	NaN	NaN	NaN	NaN	NaN	NaN	NaN	NaN	NaN	NaN	NaN	NaN	NaN	NaN	NaN	NaN	NaN	NaN	NaN	NaN	NaN
0.88627	0.78232	0.99954	0.67718	0.78951	1.047	0.3947	0.76374	0.85364	0.72761	0.83461	0.74134	0.66332	0.83969	1.0945	0.80018	0.74523	0.82181	0.74296	0.66437	0.82844	0.6734	0.55173	1.005	0.81694	0.75827	0.7109	0.76205	0.62935	0.76167	0.79983	0.8443	0.98898	0.69099	0.93846	0.90145	0.60587	0.84978	0.89583	0.79187	0.86946	0.89763	0.82172	0.90601	0.95039	1.0456	0.82072	0.81002	1.0925	0.97495
NaN	NaN	NaN	NaN	NaN	NaN	NaN	NaN	NaN	NaN	NaN	NaN	NaN	NaN	NaN	NaN	NaN	NaN	NaN	NaN	NaN	NaN	NaN	NaN	NaN	NaN	NaN	NaN	NaN	NaN	NaN	NaN	NaN	NaN	NaN	NaN	NaN	NaN	NaN	NaN	NaN	NaN	NaN	NaN	NaN	NaN	NaN	NaN	NaN	NaN
NaN	NaN	NaN	NaN	NaN	NaN	NaN	NaN	NaN	NaN	NaN	NaN	NaN	NaN	NaN	NaN	NaN	NaN	NaN	NaN	NaN	NaN	NaN	NaN	NaN	NaN	NaN	NaN	NaN	NaN	NaN	NaN	NaN	NaN	NaN	NaN	NaN	NaN	NaN	NaN	NaN	NaN	NaN	NaN	NaN	NaN	NaN	NaN	NaN	NaN
NaN	NaN	NaN	1.2234	NaN	NaN	NaN	NaN	NaN	0.87445	NaN	NaN	NaN	NaN	NaN	NaN	NaN	NaN	NaN	NaN	NaN	NaN	NaN	NaN	NaN	NaN	NaN	NaN	NaN	NaN	NaN	NaN	NaN	NaN	NaN	NaN	NaN	NaN	NaN	NaN	NaN	NaN	NaN	NaN	NaN	NaN	NaN	NaN	NaN	NaN
NaN	NaN	NaN	0.67127	NaN	NaN	0.306	NaN	NaN	0.55957	NaN	NaN	NaN	NaN	NaN	0.85968	NaN	NaN	NaN	NaN	NaN	NaN	NaN	NaN	0.67735	NaN	NaN	NaN	NaN	NaN	NaN	NaN	NaN	NaN	NaN	NaN	NaN	NaN	NaN	NaN	NaN	NaN	0.83743	NaN	NaN	NaN	NaN	NaN	NaN	NaN
NaN	NaN	NaN	NaN	NaN	NaN	NaN	NaN	NaN	NaN	NaN	NaN	NaN	NaN	NaN	NaN	NaN	NaN	NaN	NaN	NaN	NaN	NaN	NaN	NaN	NaN	NaN	NaN	NaN	NaN	NaN	NaN	NaN	NaN	NaN	NaN	NaN	NaN	NaN	NaN	NaN	NaN	NaN	NaN	NaN	NaN	NaN	NaN	NaN	NaN
0.65812	NaN	NaN	NaN	NaN	NaN	NaN	NaN	NaN	NaN	NaN	NaN	NaN	0.52151	NaN	NaN	NaN	NaN	NaN	0.50158	NaN	NaN	NaN	NaN	NaN	0.67547	NaN	NaN	NaN	NaN	NaN	NaN	NaN	NaN	NaN	NaN	NaN	NaN	NaN	NaN	NaN	NaN	NaN	NaN	NaN	NaN	NaN	0.51434	NaN	NaN
0.91476	1.0711	NaN	0.85445	NaN	NaN	0.44423	0.82109	NaN	0.95051	NaN	NaN	0.67992	1.0166	NaN	0.9528	0.72411	NaN	0.71064	NaN	NaN	0.86351	NaN	NaN	0.859	0.72585	NaN	NaN	0.73249	NaN	NaN	1.0505	NaN	NaN	1.1506	NaN	0.80226	NaN	NaN	1.0361	1.0979	NaN	0.84777	NaN	NaN	1.5351	NaN	1.0319	NaN	1.0093
0.95041	1.1713	1.1136	0.69568	1.0657	NaN	NaN	1.1017	1.0267	0.87243	0.93752	0.69958	0.64314	0.86399	0.63188	0.9341	NaN	1.125	0.85521	0.55872	1.0571	0.54242	1.2138	1.1124	0.93933	0.69351	0.87235	0.93991	0.95777	NaN	0.83043	0.86403	1.1241	1.0314	0.92706	1.2139	1.0749	0.90012	1.1406	0.99264	0.94325	0.92992	1.1052	0.78341	0.89302	1.9564	0.77018	0.78564	1.8535	0.90927
NaN	NaN	NaN	NaN	NaN	NaN	NaN	NaN	NaN	NaN	NaN	NaN	NaN	NaN	NaN	NaN	NaN	NaN	NaN	NaN	NaN	NaN	NaN	NaN	NaN	NaN	NaN	NaN	NaN	NaN	NaN	NaN	NaN	NaN	NaN	NaN	NaN	NaN	NaN	NaN	NaN	NaN	NaN	NaN	NaN	NaN	NaN	NaN	NaN	NaN
NaN	NaN	NaN	NaN	0.87442	NaN	NaN	NaN	NaN	NaN	NaN	NaN	NaN	NaN	NaN	NaN	NaN	NaN	NaN	NaN	NaN	NaN	0.72098	NaN	NaN	NaN	NaN	NaN	NaN	NaN	NaN	NaN	NaN	NaN	NaN	NaN	NaN	NaN	NaN	NaN	NaN	NaN	NaN	0.70973	NaN	NaN	NaN	0.70884	NaN	0.81534
NaN	NaN	NaN	NaN	0.64729	NaN	NaN	NaN	NaN	NaN	NaN	NaN	NaN	0.48783	NaN	NaN	NaN	NaN	1.2719	NaN	NaN	NaN	0.69715	NaN	0.79724	0.69798	NaN	NaN	NaN	NaN	NaN	NaN	NaN	0.95416	NaN	NaN	NaN	NaN	NaN	0.93183	NaN	NaN	NaN	NaN	NaN	0.52028	NaN	NaN	NaN	NaN
NaN	NaN	NaN	NaN	0.72262	NaN	NaN	NaN	NaN	NaN	NaN	NaN	NaN	NaN	NaN	NaN	0.75168	NaN	NaN	NaN	NaN	0.69298	NaN	NaN	NaN	NaN	NaN	NaN	NaN	NaN	0.74732	NaN	NaN	NaN	NaN	NaN	0.549	NaN	NaN	NaN	NaN	NaN	NaN	NaN	NaN	NaN	NaN	NaN	NaN	NaN
1.0077	0.77048	1.0105	0.66123	0.63077	0.7578	0.56357	0.69848	1.0614	0.93745	0.84504	0.70438	0.92418	0.66734	0.88092	0.83389	0.60874	0.58192	0.72036	0.77878	0.8668	0.73956	0.70631	NaN	0.79333	0.77697	NaN	0.71872	0.51357	0.64516	0.95376	1.0283	0.69587	0.80686	NaN	NaN	0.66032	0.87515	NaN	0.87919	0.70414	NaN	0.78694	0.92574	0.84567	0.92397	NaN	0.92898	1.2735	0.73442
NaN	NaN	NaN	NaN	NaN	NaN	NaN	NaN	NaN	NaN	NaN	NaN	NaN	NaN	NaN	NaN	NaN	NaN	NaN	NaN	NaN	NaN	NaN	NaN	NaN	NaN	NaN	NaN	NaN	NaN	NaN	NaN	NaN	NaN	NaN	NaN	NaN	NaN	NaN	NaN	NaN	NaN	NaN	NaN	NaN	NaN	NaN	NaN	NaN	NaN
NaN	NaN	NaN	NaN	NaN	NaN	NaN	NaN	NaN	NaN	NaN	NaN	NaN	NaN	NaN	NaN	NaN	NaN	NaN	NaN	NaN	NaN	NaN	NaN	NaN	NaN	NaN	NaN	NaN	NaN	NaN	NaN	NaN	NaN	NaN	NaN	NaN	NaN	NaN	NaN	NaN	NaN	NaN	NaN	NaN	NaN	NaN	NaN	NaN	NaN
0.82935	0.72007	NaN	0.52998	0.64461	NaN	0.4215	0.5982	NaN	0.65655	0.58342	NaN	0.62316	0.57933	1.1825	0.79073	0.52065	1.2436	0.63442	0.51	NaN	0.57186	0.66511	1.27	0.82501	0.68801	1.0813	0.64001	0.58321	0.82768	0.73681	0.78768	NaN	0.78199	0.23289	0.68008	0.64738	0.68386	1.0204	0.7722	0.63094	1.1137	0.73116	0.62624	1.1838	0.82843	1.0707	0.65349	NaN	0.23827
0.90693	1.0279	1.0962	0.63014	0.8677	1.2585	0.42103	0.85084	0.90639	0.66796	0.81966	1.0461	0.68714	0.83396	0.86711	0.96868	0.78541	1.0808	0.75489	0.75713	0.94352	0.61127	0.86231	1.0698	0.83328	0.93342	1.1035	0.75307	0.76694	1.1389	0.89664	0.94299	0.91528	0.77918	0.45569	0.93498	0.77209	0.88253	1.1321	0.82828	0.55911	1.1079	0.81461	0.63748	1.0199	1.2431	0.78546	0.72546	1.3875	0.7145
NaN	NaN	NaN	NaN	NaN	NaN	NaN	NaN	NaN	NaN	NaN	NaN	NaN	NaN	NaN	NaN	NaN	NaN	NaN	NaN	NaN	NaN	NaN	NaN	NaN	NaN	NaN	NaN	NaN	NaN	NaN	NaN	NaN	NaN	NaN	NaN	NaN	NaN	NaN	NaN	NaN	NaN	NaN	NaN	NaN	NaN	NaN	NaN	NaN	NaN
NaN	NaN	NaN	NaN	NaN	NaN	NaN	NaN	NaN	NaN	NaN	NaN	NaN	NaN	NaN	NaN	NaN	NaN	NaN	NaN	NaN	NaN	0.58238	NaN	NaN	NaN	NaN	NaN	NaN	NaN	NaN	NaN	NaN	NaN	NaN	NaN	NaN	NaN	NaN	NaN	NaN	NaN	NaN	NaN	NaN	NaN	NaN	NaN	1.038	0.57897
NaN	0.72838	1.0986	NaN	0.56878	NaN	NaN	NaN	NaN	NaN	0.48686	NaN	NaN	NaN	0.58698	NaN	0.44976	0.98671	NaN	0.4829	NaN	NaN	0.52781	0.85529	NaN	0.64716	NaN	0.46645	0.53157	NaN	NaN	0.69211	NaN	NaN	0.68759	NaN	NaN	0.72347	0.68978	NaN	NaN	NaN	NaN	0.80953	NaN	1.0479	NaN	0.74455	2.2273	0.70786
NaN	0.67738	NaN	0.33303	NaN	NaN	NaN	NaN	NaN	0.63614	NaN	NaN	0.40744	NaN	NaN	NaN	NaN	NaN	NaN	0.52485	NaN	NaN	NaN	NaN	0.90048	NaN	NaN	NaN	NaN	NaN	NaN	NaN	NaN	NaN	NaN	NaN	1.2853	NaN	NaN	0.80202	NaN	NaN	1.1091	NaN	NaN	NaN	NaN	NaN	NaN	NaN
NaN	NaN	NaN	NaN	NaN	NaN	NaN	NaN	NaN	NaN	NaN	NaN	NaN	NaN	NaN	NaN	NaN	NaN	NaN	NaN	NaN	NaN	NaN	NaN	NaN	NaN	NaN	NaN	NaN	NaN	NaN	NaN	NaN	NaN	NaN	NaN	NaN	NaN	NaN	NaN	NaN	NaN	NaN	NaN	NaN	NaN	NaN	NaN	NaN	NaN
1.1416	0.74384	1.0808	0.81216	0.7304	NaN	0.36454	0.68698	0.74491	0.8099	0.57423	1.0944	0.85247	0.58203	0.96597	1.2695	0.57642	0.91542	0.90522	0.6408	0.97715	0.73559	0.68185	0.93129	1.0295	0.53802	0.94589	0.87202	0.59734	0.99566	NaN	0.72192	1.1309	0.9806	0.4663	0.95996	0.72711	0.70527	1.0709	0.80709	0.57509	NaN	0.93345	0.70918	1.0329	1.093	0.72705	0.64785	1.4319	0.54853
NaN	NaN	1.2659	NaN	NaN	NaN	NaN	NaN	NaN	NaN	NaN	NaN	NaN	NaN	NaN	NaN	NaN	NaN	NaN	NaN	NaN	NaN	NaN	NaN	NaN	NaN	NaN	NaN	NaN	NaN	NaN	NaN	NaN	0.71735	NaN	NaN	NaN	NaN	NaN	NaN	NaN	NaN	NaN	NaN	NaN	NaN	NaN	NaN	NaN	NaN
0.73682	0.82957	1.1315	0.54795	0.7652	1.4688	0.34044	0.80219	0.80024	0.74285	0.52732	0.92051	0.61697	0.70291	0.89504	0.63628	0.73663	1.0578	0.66289	0.73674	0.96544	0.78587	0.808	0.94988	0.86294	0.86537	1.288	0.47769	0.48856	0.86453	0.71714	0.96425	1.2507	0.7102	0.73733	0.97368	0.60846	0.8917	1.1436	0.63298	0.76404	1.2055	0.71443	0.68225	0.84114	1.0106	0.83983	0.71288	2.0891	0.91379
NaN	NaN	NaN	NaN	NaN	NaN	NaN	NaN	NaN	NaN	NaN	NaN	NaN	NaN	NaN	NaN	NaN	NaN	NaN	NaN	NaN	NaN	NaN	NaN	NaN	NaN	NaN	NaN	NaN	NaN	NaN	NaN	NaN	NaN	NaN	NaN	NaN	NaN	NaN	NaN	NaN	NaN	NaN	NaN	NaN	NaN	NaN	NaN	NaN	NaN
1.0902	0.94688	0.91922	0.74131	0.70075	0.923	0.45425	NaN	0.82902	1.0572	0.84489	0.8072	0.9245	0.82875	0.94368	1.0699	NaN	0.71314	0.7357	0.42363	0.8864	0.77412	0.52898	NaN	0.96477	NaN	NaN	0.96476	0.8912	0.6994	0.76107	0.76144	1.0528	1.2498	NaN	0.80416	0.619	NaN	0.80823	0.93794	1.0878	0.77886	0.68795	NaN	0.84677	NaN	0.64283	1.3482	1.3518	NaN
NaN	0.72564	NaN	0.68724	0.77501	NaN	0.36907	0.66501	1.0075	0.91085	NaN	1.0002	NaN	0.66873	1.1697	0.90384	NaN	1.1861	0.71472	NaN	NaN	0.80565	0.69315	1.213	0.81645	NaN	1.025	0.74568	0.64602	1.0352	0.83549	0.67101	1.1139	0.78579	NaN	1.1011	0.6706	NaN	1.168	0.8262	NaN	1.2208	0.77383	NaN	1.1299	1.0267	0.88737	0.81439	1.6442	0.7307
NaN	NaN	NaN	NaN	NaN	NaN	NaN	NaN	NaN	NaN	NaN	NaN	NaN	NaN	NaN	NaN	NaN	NaN	NaN	NaN	NaN	NaN	NaN	NaN	NaN	NaN	NaN	NaN	NaN	NaN	NaN	NaN	NaN	NaN	NaN	NaN	NaN	NaN	NaN	NaN	NaN	NaN	NaN	NaN	NaN	NaN	NaN	NaN	NaN	NaN
NaN	NaN	NaN	NaN	NaN	NaN	0.31356	NaN	NaN	NaN	NaN	NaN	NaN	NaN	NaN	NaN	NaN	NaN	NaN	NaN	NaN	NaN	NaN	NaN	NaN	NaN	NaN	0.70298	NaN	NaN	NaN	NaN	NaN	NaN	NaN	NaN	NaN	NaN	NaN	NaN	NaN	NaN	NaN	NaN	NaN	NaN	NaN	NaN	NaN	NaN
NaN	NaN	NaN	NaN	NaN	NaN	NaN	0.66993	NaN	NaN	NaN	NaN	NaN	NaN	NaN	NaN	NaN	NaN	NaN	NaN	NaN	NaN	NaN	NaN	NaN	NaN	NaN	NaN	0.4828	NaN	NaN	NaN	NaN	NaN	NaN	NaN	NaN	NaN	NaN	NaN	NaN	NaN	NaN	NaN	NaN	0.93732	NaN	NaN	NaN	NaN
NaN	NaN	NaN	NaN	NaN	NaN	NaN	NaN	NaN	NaN	NaN	NaN	NaN	NaN	NaN	0.74017	NaN	NaN	NaN	NaN	NaN	NaN	NaN	NaN	NaN	NaN	NaN	NaN	NaN	NaN	0.67808	NaN	NaN	NaN	NaN	NaN	NaN	NaN	NaN	NaN	NaN	NaN	NaN	NaN	NaN	NaN	NaN	NaN	NaN	NaN
0.84389	0.69196	NaN	0.68548	NaN	0.83938	0.58327	NaN	NaN	NaN	NaN	0.56105	NaN	NaN	0.79981	NaN	0.62576	0.8413	0.60219	NaN	NaN	0.46062	0.83419	0.68811	0.52429	2.6556	NaN	NaN	NaN	NaN	NaN	2.0263	NaN	0.9147	0.71248	NaN	0.69592	3.103	NaN	1.1457	NaN	NaN	0.97286	0.93202	0.56309	0.99187	NaN	0.77697	NaN	NaN
NaN	NaN	NaN	NaN	NaN	NaN	NaN	NaN	NaN	NaN	NaN	NaN	NaN	NaN	NaN	NaN	NaN	NaN	NaN	NaN	NaN	NaN	NaN	NaN	NaN	NaN	NaN	NaN	NaN	NaN	NaN	NaN	NaN	NaN	NaN	NaN	NaN	NaN	NaN	NaN	NaN	NaN	NaN	NaN	NaN	NaN	NaN	NaN	NaN	NaN
NaN	NaN	NaN	NaN	NaN	NaN	NaN	NaN	NaN	NaN	NaN	NaN	NaN	NaN	NaN	NaN	NaN	NaN	NaN	NaN	NaN	NaN	NaN	NaN	NaN	NaN	NaN	NaN	NaN	NaN	NaN	NaN	NaN	NaN	NaN	NaN	NaN	NaN	NaN	NaN	NaN	NaN	NaN	NaN	NaN	NaN	NaN	NaN	NaN	NaN
NaN	NaN	NaN	0.57915	NaN	NaN	0.26254	NaN	NaN	0.64649	NaN	NaN	0.45643	NaN	NaN	NaN	NaN	NaN	0.58824	NaN	NaN	0.61169	NaN	NaN	0.76761	0.73912	NaN	0.5975	NaN	NaN	NaN	0.88632	NaN	NaN	NaN	NaN	0.59959	NaN	NaN	0.79995	NaN	NaN	0.66229	NaN	NaN	NaN	NaN	NaN	NaN	NaN
NaN	NaN	NaN	NaN	NaN	NaN	NaN	NaN	NaN	NaN	NaN	NaN	NaN	NaN	NaN	NaN	NaN	NaN	NaN	NaN	NaN	NaN	NaN	NaN	NaN	NaN	NaN	NaN	NaN	NaN	NaN	NaN	NaN	NaN	NaN	NaN	NaN	NaN	NaN	NaN	NaN	NaN	NaN	NaN	NaN	NaN	NaN	NaN	NaN	NaN
0.88198	0.8301	0.99733	0.67149	0.73691	0.99125	0.36211	0.72468	0.83931	0.719	0.67934	0.87506	0.59848	0.66987	0.91589	0.89371	0.65396	1.0183	0.85663	0.58309	0.8198	0.68741	0.6528	1.0736	0.71131	0.68588	0.77382	0.54457	0.65899	0.81808	0.81494	0.74884	0.97557	0.7772	0.6456	0.9395	0.57633	0.60465	1.1474	0.70886	0.68575	0.89128	0.78577	0.72806	0.95844	1.0572	0.791	0.68435	1.7558	0.81657
0.81138	NaN	NaN	0.85424	NaN	NaN	NaN	NaN	NaN	0.88714	NaN	NaN	0.96688	NaN	NaN	NaN	0.44999	NaN	0.70151	NaN	NaN	0.60777	0.45277	NaN	NaN	0.68764	NaN	0.85015	NaN	NaN	1.0195	0.77124	NaN	NaN	NaN	NaN	NaN	NaN	NaN	0.65863	NaN	NaN	0.76776	NaN	NaN	1.2664	NaN	NaN	NaN	0.63596
0.63788	0.7701	0.87611	NaN	0.62136	0.8194	0.34139	0.6199	1.1752	NaN	0.65031	0.69845	NaN	0.64563	0.67058	0.90319	0.56928	0.76638	0.50796	0.68072	0.86109	0.50189	0.66909	0.87861	0.87649	0.65308	0.71735	0.61715	0.54978	0.79373	NaN	0.66401	0.7378	0.81435	0.5527	0.69676	0.73443	0.66123	0.90014	0.98391	0.56292	0.83051	NaN	0.62608	NaN	1.0182	NaN	0.57034	NaN	0.64173
0.9577	0.77054	1.0249	0.87687	0.42023	1.2541	0.37755	0.49824	0.9664	1.6299	0.47298	0.87415	0.63734	0.51218	0.96297	0.87674	0.51108	1.0091	0.67971	0.76581	0.83358	1.9316	0.53408	0.97749	0.62955	0.50609	0.84772	0.72163	0.50815	0.79189	0.7759	0.68128	0.91654	0.98186	0.36235	0.97702	0.91379	0.51471	0.96753	0.81082	0.356	1.0272	0.82314	0.47675	0.91811	0.79299	0.77147	0.44837	1.4196	0.53852
NaN	NaN	0.90548	NaN	NaN	1.05	NaN	NaN	0.88202	NaN	NaN	0.91759	NaN	NaN	NaN	NaN	NaN	0.92221	NaN	NaN	0.59569	NaN	NaN	1.0143	NaN	NaN	0.88282	NaN	NaN	NaN	NaN	NaN	0.97479	NaN	NaN	1.1307	NaN	NaN	1.0034	NaN	NaN	1.2479	NaN	NaN	NaN	NaN	0.81814	NaN	1.2391	NaN
NaN	NaN	0.87806	NaN	NaN	NaN	1.7294	NaN	NaN	0.86579	0.69355	NaN	NaN	0.70663	NaN	0.96474	NaN	NaN	NaN	NaN	NaN	NaN	0.55998	NaN	NaN	NaN	NaN	0.64149	NaN	NaN	NaN	NaN	NaN	NaN	NaN	NaN	0.85022	NaN	NaN	0.88865	NaN	NaN	0.69019	NaN	NaN	NaN	NaN	NaN	NaN	NaN
0.89553	0.74839	0.95268	0.81053	0.737	1.1293	0.41487	0.72414	1.2547	0.79772	0.62795	0.80387	0.74316	0.72876	0.99536	0.86986	0.60118	0.95044	0.84302	0.54895	0.86015	0.72815	0.7277	0.90577	0.83618	0.69484	0.84714	0.66693	0.64531	0.76657	0.79773	0.80067	0.95653	0.78051	0.69084	1.007	0.58525	0.79338	0.94394	0.81803	0.57077	0.99565	0.6994	0.76059	0.92035	0.98598	0.6784	0.95803	1.3416	0.83651
0.85411	0.73526	1.0077	0.7584	0.85249	1.0718	0.42521	0.69244	1.0199	0.88466	0.72269	0.72109	0.60889	0.80715	0.9668	0.81605	0.72388	0.98861	0.72441	0.71825	0.95025	0.70457	0.78219	0.99534	0.79737	0.7556	0.72827	0.73448	0.63208	0.72693	0.76036	0.88418	0.92788	0.93326	0.32006	0.97792	0.60999	0.86076	0.97368	0.73564	0.44742	1.0127	0.80204	0.60843	0.93009	0.84782	0.76815	0.57795	1.5352	0.61603
0.87703	1.7779	0.87497	0.5293	NaN	0.95654	0.38182	0.72549	0.71462	1.1575	NaN	NaN	1.0019	NaN	NaN	0.60409	NaN	0.91152	NaN	NaN	0.84704	1.2951	0.65344	1.0267	0.71507	0.79721	0.76814	NaN	0.56625	NaN	0.79603	NaN	NaN	1.0338	0.16234	NaN	0.53762	0.38792	0.98749	0.62255	NaN	NaN	0.65038	NaN	NaN	NaN	NaN	NaN	NaN	NaN
1.3117	1.2061	0.95336	NaN	1.1044	NaN	NaN	0.52605	0.70475	NaN	NaN	1.2253	NaN	0.60744	NaN	1.362	0.50111	0.86102	NaN	NaN	NaN	NaN	0.85312	NaN	1.0407	NaN	NaN	NaN	NaN	0.69988	0.94471	0.46351	1.0852	0.80548	NaN	1.129	NaN	0.54112	0.85579	NaN	0.82199	0.79061	NaN	NaN	NaN	0.98982	NaN	NaN	NaN	0.52067
0.9267	0.75885	0.95659	0.92997	0.75435	1.1783	0.37218	0.68439	0.80642	0.7315	0.63522	0.84644	1.0751	0.67316	0.9832	0.95084	0.6096	0.93711	0.80866	0.63549	0.95351	0.70783	0.71019	1.0025	0.78919	0.72019	0.7321	0.86881	0.60582	0.89413	0.8001	0.75749	0.89656	0.81788	0.50983	0.92406	0.66999	0.78692	0.97943	0.84629	0.60678	1.0299	0.82339	0.70621	0.93512	0.99394	0.80136	0.71063	1.3766	0.62652
0.90527	1.0227	0.88073	0.84926	1.0302	NaN	NaN	0.62663	NaN	0.68085	0.57035	1.0016	NaN	0.7004	NaN	NaN	0.65561	NaN	0.71547	0.68764	0.87144	0.55768	0.88925	NaN	0.6284	0.94649	NaN	NaN	0.543	0.96394	NaN	0.76544	NaN	NaN	NaN	NaN	NaN	0.88913	NaN	NaN	0.70769	1.1258	NaN	0.20285	NaN	0.67053	NaN	0.78182	NaN	0.46087
0.87864	0.84298	1.0179	0.55796	0.57283	1.3136	0.34962	0.5732	0.97675	0.70531	0.59138	1.2093	0.62765	0.54138	1.0286	0.79742	0.59803	1.0479	0.62345	0.69907	1.0517	0.66762	0.58372	0.99617	0.76898	0.65294	0.82375	0.62482	0.52254	0.8425	0.84449	0.70136	1.1265	0.72221	0.70606	1.2063	0.63788	0.64882	1.0224	0.73363	0.86137	1.1879	0.71941	0.55119	1.0089	0.99992	0.80852	0.64279	1.4853	0.61272
0.89043	0.70308	1.0086	0.60065	0.74341	1.0742	0.38439	0.60659	0.8543	0.69645	0.6487	0.91927	0.62508	0.71418	0.95612	0.89093	0.61979	0.96772	0.74625	0.61274	0.89844	0.64783	0.64572	1.0495	0.8203	0.67714	0.84656	0.74224	0.68036	0.82066	0.75956	0.771	0.87501	0.78448	0.67318	0.95728	0.60533	0.67383	0.95385	0.78674	0.6343	1.0626	0.78556	0.72251	0.89589	0.95245	0.74919	0.66637	1.2752	0.73977
0.89905	0.76654	1.0235	0.70763	0.75402	1.2322	0.41053	0.63625	0.92313	0.70757	0.62929	0.82663	0.66242	0.71284	0.89455	0.88501	0.57628	1.0316	0.70987	0.6265	0.84434	0.67958	0.68491	0.999	0.7748	0.71848	0.82626	0.80245	0.58972	0.75302	0.8013	0.74684	0.94049	0.75696	0.55774	0.9478	0.64909	0.70714	0.94692	0.88779	0.59512	0.96007	0.76364	0.73762	0.9756	0.96408	0.6376	0.67263	1.3613	0.71821
NaN	NaN	NaN	NaN	NaN	NaN	NaN	NaN	NaN	NaN	NaN	NaN	NaN	NaN	NaN	NaN	NaN	NaN	NaN	NaN	NaN	NaN	NaN	NaN	NaN	NaN	NaN	NaN	NaN	NaN	NaN	NaN	NaN	NaN	NaN	NaN	NaN	NaN	NaN	NaN	NaN	NaN	NaN	NaN	NaN	NaN	NaN	NaN	NaN	NaN
NaN	NaN	NaN	NaN	NaN	NaN	NaN	NaN	NaN	NaN	NaN	NaN	NaN	NaN	NaN	NaN	NaN	NaN	NaN	NaN	NaN	NaN	NaN	NaN	NaN	NaN	NaN	NaN	NaN	NaN	NaN	NaN	NaN	NaN	NaN	NaN	NaN	NaN	NaN	NaN	NaN	NaN	NaN	NaN	NaN	NaN	NaN	NaN	NaN	NaN
1.5141	1.1782	NaN	1.098	NaN	NaN	0.83715	NaN	NaN	1.1353	NaN	NaN	0.73855	NaN	NaN	1.0014	NaN	0.93244	0.91619	NaN	NaN	0.79818	NaN	NaN	1.285	NaN	NaN	0.88799	NaN	NaN	1.0468	NaN	NaN	1.3306	NaN	NaN	0.95973	NaN	NaN	0.97425	NaN	NaN	1.0914	0.74469	NaN	NaN	NaN	NaN	NaN	0.56524
NaN	NaN	NaN	NaN	NaN	NaN	NaN	NaN	NaN	NaN	0.56191	NaN	NaN	NaN	NaN	NaN	NaN	NaN	NaN	NaN	NaN	NaN	NaN	NaN	NaN	NaN	NaN	NaN	NaN	NaN	NaN	NaN	NaN	NaN	NaN	NaN	NaN	NaN	NaN	NaN	NaN	NaN	NaN	NaN	NaN	NaN	NaN	NaN	NaN	NaN
0.86295	NaN	NaN	0.67135	NaN	NaN	0.3702	NaN	NaN	0.76367	NaN	NaN	0.64046	NaN	NaN	1.3388	NaN	NaN	0.66347	NaN	NaN	0.62706	NaN	NaN	0.74315	NaN	NaN	0.64265	NaN	NaN	0.72125	NaN	NaN	0.92754	NaN	NaN	0.51892	NaN	NaN	0.791	NaN	NaN	0.73436	NaN	NaN	NaN	NaN	NaN	NaN	NaN
0.92891	0.74992	0.90944	0.5409	0.76038	1.1286	0.39496	0.6286	0.78105	0.63541	0.639	0.94319	0.58983	0.70662	0.96593	0.72559	0.60578	0.98759	0.68116	0.65783	0.97451	0.52936	0.79897	1.0112	0.74707	0.71658	1.0093	0.73547	0.56145	0.99679	0.79084	0.7414	0.93844	0.87014	0.52644	0.87848	0.62	0.76458	1.0191	0.78418	0.5748	1.0497	0.71253	0.60551	1.0428	1.0978	0.59036	0.63884	1.2647	0.69137
1.0114	0.77677	0.90582	0.6582	0.7899	0.89963	0.36563	0.74762	1.0496	0.78484	0.69351	0.69108	0.75272	0.7087	0.89119	1.0442	0.69722	0.96357	0.72743	0.5435	0.77692	0.59015	0.72673	1.099	0.87332	0.90213	0.80059	0.68893	0.78055	0.73342	0.93788	0.64705	0.88991	0.78198	0.77282	0.90838	0.71814	0.74916	0.94974	0.72525	0.68876	0.94545	0.77349	0.80184	0.85596	1.0345	0.75341	0.82236	1.1546	0.84428
NaN	NaN	NaN	NaN	NaN	NaN	NaN	NaN	NaN	NaN	NaN	NaN	NaN	NaN	NaN	NaN	NaN	NaN	NaN	NaN	NaN	NaN	NaN	NaN	NaN	NaN	NaN	NaN	NaN	NaN	NaN	NaN	NaN	NaN	NaN	NaN	NaN	NaN	NaN	NaN	NaN	NaN	NaN	NaN	NaN	NaN	NaN	NaN	NaN	NaN
0.70999	NaN	NaN	NaN	NaN	NaN	NaN	NaN	NaN	NaN	NaN	NaN	0.66237	NaN	NaN	0.8868	NaN	NaN	0.74099	NaN	NaN	NaN	NaN	NaN	NaN	NaN	NaN	0.43725	NaN	NaN	NaN	NaN	NaN	NaN	NaN	NaN	0.42037	NaN	NaN	NaN	NaN	NaN	NaN	NaN	NaN	NaN	NaN	NaN	NaN	NaN
NaN	NaN	NaN	NaN	NaN	NaN	NaN	NaN	0.99029	NaN	NaN	NaN	NaN	NaN	NaN	NaN	NaN	1.0442	NaN	NaN	NaN	NaN	NaN	1.1953	NaN	NaN	NaN	NaN	NaN	NaN	NaN	1.1991	NaN	NaN	NaN	NaN	NaN	NaN	1.2641	NaN	NaN	0.94117	NaN	NaN	1.2658	0.96868	0.65678	NaN	NaN	NaN
0.88594	NaN	NaN	0.65379	NaN	NaN	NaN	NaN	NaN	NaN	NaN	NaN	0.63628	NaN	NaN	NaN	NaN	NaN	0.71814	NaN	NaN	0.62931	NaN	NaN	0.80591	NaN	NaN	0.77084	NaN	NaN	NaN	NaN	NaN	0.76076	NaN	NaN	0.69481	NaN	NaN	0.93057	0.75887	NaN	0.78195	0.78333	NaN	1.125	NaN	0.66824	NaN	0.72278
NaN	NaN	NaN	NaN	NaN	NaN	NaN	NaN	NaN	NaN	NaN	NaN	NaN	NaN	NaN	NaN	NaN	NaN	NaN	NaN	NaN	NaN	NaN	NaN	NaN	NaN	NaN	NaN	NaN	NaN	NaN	NaN	NaN	NaN	NaN	NaN	NaN	NaN	0.61605	NaN	NaN	NaN	NaN	NaN	NaN	NaN	NaN	NaN	NaN	NaN
NaN	NaN	NaN	NaN	NaN	NaN	NaN	NaN	NaN	NaN	NaN	NaN	NaN	NaN	NaN	NaN	NaN	NaN	NaN	NaN	NaN	NaN	NaN	NaN	NaN	NaN	NaN	NaN	NaN	NaN	NaN	NaN	NaN	NaN	NaN	NaN	NaN	NaN	NaN	NaN	NaN	NaN	NaN	NaN	NaN	NaN	NaN	NaN	NaN	NaN
1.0557	0.83644	1.0597	0.70703	0.82501	1.1355	0.40835	0.78719	1.1111	0.81685	0.75616	0.97698	0.74565	0.85616	1.0981	0.94022	0.78541	1.0585	0.76443	0.74744	0.98436	0.58211	0.791	1.0726	0.91001	0.78658	0.78535	0.78406	0.73374	0.84951	0.79945	0.88704	1.0158	0.84646	0.5986	0.98173	0.80447	0.70231	0.91459	0.81186	0.65285	0.85683	0.81288	0.68652	1.0686	1.0206	0.79186	0.69491	1.4351	0.84828
NaN	NaN	NaN	NaN	NaN	NaN	NaN	NaN	NaN	NaN	NaN	NaN	NaN	NaN	NaN	NaN	NaN	NaN	NaN	NaN	NaN	NaN	NaN	NaN	NaN	NaN	NaN	NaN	NaN	NaN	NaN	NaN	NaN	NaN	NaN	NaN	NaN	NaN	NaN	NaN	NaN	NaN	NaN	NaN	NaN	NaN	NaN	NaN	NaN	NaN
NaN	NaN	NaN	NaN	NaN	NaN	NaN	NaN	NaN	NaN	NaN	NaN	NaN	NaN	NaN	NaN	NaN	NaN	NaN	NaN	NaN	NaN	NaN	NaN	NaN	NaN	NaN	NaN	NaN	NaN	NaN	NaN	NaN	NaN	NaN	NaN	NaN	NaN	NaN	NaN	NaN	NaN	NaN	NaN	NaN	NaN	NaN	NaN	NaN	NaN
NaN	NaN	NaN	NaN	NaN	NaN	NaN	NaN	NaN	NaN	NaN	NaN	NaN	NaN	NaN	NaN	NaN	NaN	NaN	NaN	NaN	NaN	NaN	NaN	NaN	NaN	NaN	NaN	NaN	NaN	NaN	NaN	NaN	NaN	NaN	NaN	NaN	NaN	NaN	NaN	NaN	NaN	NaN	NaN	NaN	NaN	NaN	NaN	NaN	NaN
NaN	NaN	NaN	NaN	NaN	NaN	NaN	0.73945	NaN	NaN	NaN	NaN	NaN	NaN	NaN	NaN	NaN	NaN	NaN	NaN	NaN	NaN	NaN	NaN	NaN	0.76601	NaN	NaN	NaN	NaN	NaN	NaN	NaN	NaN	NaN	NaN	NaN	NaN	NaN	NaN	NaN	NaN	NaN	NaN	NaN	NaN	NaN	NaN	NaN	NaN
NaN	NaN	NaN	NaN	NaN	NaN	NaN	NaN	NaN	NaN	NaN	NaN	NaN	NaN	NaN	NaN	NaN	NaN	NaN	NaN	NaN	NaN	NaN	NaN	NaN	NaN	NaN	NaN	NaN	NaN	NaN	NaN	NaN	NaN	NaN	NaN	NaN	NaN	NaN	NaN	NaN	NaN	NaN	NaN	NaN	NaN	NaN	NaN	NaN	NaN
NaN	NaN	NaN	NaN	NaN	NaN	NaN	NaN	NaN	NaN	NaN	NaN	NaN	NaN	NaN	NaN	NaN	NaN	NaN	NaN	NaN	NaN	NaN	NaN	NaN	NaN	NaN	NaN	NaN	NaN	NaN	NaN	NaN	NaN	NaN	NaN	NaN	NaN	NaN	NaN	NaN	NaN	NaN	NaN	NaN	NaN	NaN	NaN	NaN	NaN
NaN	NaN	NaN	NaN	NaN	NaN	NaN	NaN	NaN	NaN	NaN	NaN	NaN	NaN	NaN	NaN	NaN	NaN	NaN	NaN	NaN	NaN	NaN	NaN	NaN	NaN	NaN	NaN	NaN	NaN	NaN	NaN	NaN	NaN	NaN	NaN	NaN	NaN	NaN	NaN	NaN	NaN	NaN	NaN	NaN	NaN	NaN	NaN	NaN	NaN
NaN	NaN	NaN	NaN	NaN	NaN	NaN	NaN	NaN	NaN	NaN	NaN	NaN	NaN	NaN	NaN	NaN	NaN	NaN	NaN	NaN	NaN	NaN	NaN	NaN	NaN	NaN	NaN	NaN	NaN	NaN	NaN	NaN	NaN	NaN	NaN	NaN	NaN	NaN	NaN	NaN	NaN	NaN	NaN	NaN	NaN	NaN	NaN	NaN	NaN
0.87253	0.86032	1.0424	0.75025	0.79641	1.039	0.4507	0.72952	0.95547	0.86089	0.67144	0.67213	0.83868	0.95744	0.85438	0.85771	0.76614	0.78783	0.80174	0.64995	0.84894	0.7611	0.69476	0.8146	0.78922	0.94474	0.7644	0.78215	0.56572	0.59435	0.89172	0.8057	0.82039	0.86143	0.79416	0.91243	0.68469	0.72109	0.77807	0.83805	0.67003	0.86956	0.86598	0.94938	0.89142	1.1794	0.72134	0.55497	1.1654	0.63876
0.82696	0.95202	1.0494	0.74177	0.57599	NaN	NaN	NaN	NaN	0.91851	0.8303	NaN	0.88955	0.698	NaN	0.79049	0.61075	NaN	NaN	0.66278	NaN	NaN	0.74285	NaN	0.85255	NaN	NaN	NaN	0.7346	0.84944	0.83087	0.74018	NaN	0.75919	0.56877	NaN	0.66092	0.83734	NaN	NaN	0.74579	NaN	0.78458	0.82109	NaN	1.1814	NaN	0.84762	NaN	0.76429
NaN	NaN	NaN	NaN	NaN	NaN	NaN	NaN	NaN	NaN	NaN	NaN	NaN	NaN	NaN	NaN	NaN	NaN	NaN	NaN	NaN	NaN	NaN	NaN	NaN	NaN	NaN	NaN	NaN	NaN	NaN	NaN	NaN	NaN	NaN	NaN	NaN	NaN	NaN	NaN	NaN	NaN	NaN	NaN	NaN	NaN	NaN	NaN	NaN	NaN
NaN	NaN	NaN	NaN	NaN	NaN	NaN	NaN	NaN	NaN	NaN	NaN	NaN	NaN	NaN	NaN	NaN	NaN	NaN	NaN	NaN	NaN	NaN	NaN	NaN	NaN	NaN	NaN	NaN	NaN	NaN	NaN	NaN	NaN	NaN	NaN	NaN	NaN	NaN	NaN	NaN	NaN	NaN	NaN	NaN	NaN	NaN	NaN	NaN	NaN
NaN	NaN	1.0516	NaN	NaN	NaN	NaN	NaN	NaN	NaN	NaN	NaN	0.62926	0.88256	NaN	0.70925	0.70934	NaN	NaN	0.6941	NaN	NaN	NaN	NaN	0.45119	NaN	NaN	0.56873	NaN	NaN	NaN	NaN	NaN	NaN	0.81317	NaN	NaN	NaN	NaN	NaN	0.68982	1.1425	NaN	NaN	NaN	NaN	NaN	NaN	NaN	NaN
NaN	NaN	NaN	NaN	NaN	NaN	NaN	NaN	NaN	NaN	NaN	NaN	NaN	NaN	NaN	NaN	NaN	NaN	NaN	NaN	NaN	NaN	NaN	NaN	NaN	NaN	NaN	NaN	NaN	NaN	NaN	NaN	NaN	NaN	NaN	NaN	NaN	NaN	NaN	NaN	NaN	NaN	NaN	NaN	NaN	NaN	NaN	NaN	NaN	NaN
NaN	NaN	NaN	NaN	NaN	NaN	NaN	NaN	NaN	NaN	NaN	NaN	NaN	NaN	NaN	NaN	NaN	NaN	NaN	NaN	NaN	NaN	NaN	NaN	NaN	NaN	NaN	NaN	NaN	NaN	NaN	NaN	NaN	NaN	NaN	NaN	NaN	NaN	NaN	NaN	NaN	NaN	NaN	NaN	NaN	NaN	NaN	NaN	NaN	NaN
0.85748	NaN	NaN	NaN	NaN	NaN	NaN	NaN	NaN	NaN	0.93722	NaN	NaN	NaN	NaN	NaN	NaN	NaN	NaN	NaN	1.0015	0.672	NaN	NaN	0.75483	NaN	NaN	0.63311	NaN	NaN	NaN	NaN	NaN	0.86032	NaN	NaN	0.92422	NaN	NaN	NaN	NaN	NaN	0.84956	NaN	NaN	NaN	NaN	1.1819	NaN	NaN
NaN	NaN	NaN	NaN	NaN	NaN	NaN	NaN	NaN	NaN	NaN	NaN	NaN	NaN	NaN	NaN	NaN	NaN	NaN	NaN	NaN	NaN	NaN	NaN	NaN	NaN	NaN	NaN	NaN	NaN	NaN	NaN	NaN	NaN	NaN	NaN	NaN	NaN	NaN	NaN	NaN	NaN	NaN	NaN	NaN	NaN	NaN	NaN	NaN	NaN
0.88254	0.7607	1.0347	0.79625	0.76066	1.3663	0.39036	0.70826	0.85437	1.0227	0.83033	0.70032	0.64708	0.80993	0.89035	0.84485	0.6713	1.0692	0.82331	0.69968	0.77376	0.99397	0.74773	1.0571	0.77819	0.69789	0.61807	0.71777	0.68149	0.77902	0.69636	0.83536	0.868	0.85264	0.46153	0.96576	0.89444	0.66872	1.0382	0.89351	0.73506	0.90367	0.82601	0.36912	0.99901	0.79384	0.658	0.68076	1.3154	0.72093
NaN	NaN	NaN	NaN	NaN	NaN	NaN	NaN	NaN	NaN	NaN	NaN	NaN	NaN	NaN	NaN	NaN	NaN	NaN	NaN	NaN	NaN	NaN	NaN	NaN	NaN	NaN	NaN	NaN	NaN	NaN	NaN	NaN	NaN	NaN	NaN	NaN	NaN	NaN	NaN	NaN	NaN	NaN	NaN	NaN	NaN	NaN	NaN	NaN	NaN
0.81345	0.75741	1.1468	NaN	0.71245	NaN	0.32007	0.62123	0.81251	NaN	NaN	0.88445	NaN	NaN	1.0416	NaN	NaN	0.98944	NaN	0.53394	0.82429	0.56557	NaN	1.0058	NaN	NaN	0.99358	0.59305	0.58142	0.9559	NaN	0.76809	0.97982	NaN	NaN	0.96656	0.81765	NaN	1.0891	0.67376	NaN	1.0454	0.68195	0.72842	1.0195	NaN	0.72912	0.70689	1.4136	0.83764
0.99892	0.83192	0.99303	0.86617	0.47931	0.99038	0.45989	0.55103	0.8434	1.1224	0.63762	0.79987	0.81693	0.55281	0.8906	0.71421	NaN	0.83037	0.78745	0.62526	0.76414	0.79943	0.55992	0.90092	0.85044	0.63659	0.81937	0.64157	0.57915	0.65482	0.7027	0.56398	0.78435	0.83485	0.5226	0.8423	0.82041	0.54629	0.78609	0.85363	0.61702	0.80443	0.77566	0.61287	0.89938	NaN	0.75025	0.59717	1.1638	NaN
NaN	0.67416	NaN	NaN	NaN	NaN	NaN	NaN	0.91171	NaN	0.52277	NaN	NaN	0.68642	NaN	NaN	0.65355	0.71673	0.71216	0.53137	NaN	0.60624	0.4951	NaN	NaN	0.75718	0.70581	1.1312	NaN	0.65218	NaN	0.86025	NaN	0.90946	0.59727	NaN	NaN	0.65727	0.60712	1.0099	NaN	0.93559	NaN	1.0312	NaN	NaN	0.72029	0.55402	0.95867	0.73499
0.87212	0.75391	0.97012	0.5799	0.76982	1.153	0.35363	0.62967	0.86199	0.6208	0.57798	0.8911	0.58938	0.64314	0.89261	0.79391	0.64673	0.95449	0.68253	0.58509	0.8414	0.57327	0.68795	0.97279	0.73841	0.70134	0.76164	0.70467	0.66631	0.76746	0.71544	0.71761	0.90949	0.72207	0.59185	0.95115	0.58572	0.72714	0.87905	0.77786	0.61921	0.96485	0.71473	0.76499	0.9138	0.98316	0.69719	0.68963	1.234	0.70333
NaN	NaN	NaN	NaN	NaN	NaN	NaN	NaN	NaN	NaN	NaN	NaN	NaN	NaN	NaN	NaN	NaN	NaN	NaN	NaN	NaN	NaN	NaN	NaN	NaN	NaN	NaN	NaN	NaN	NaN	NaN	NaN	NaN	NaN	NaN	NaN	NaN	NaN	NaN	NaN	NaN	NaN	NaN	NaN	NaN	NaN	NaN	NaN	NaN	NaN
0.90358	NaN	NaN	NaN	NaN	NaN	NaN	NaN	NaN	NaN	NaN	NaN	0.57485	NaN	NaN	NaN	NaN	NaN	0.72798	NaN	NaN	0.9583	NaN	NaN	NaN	NaN	NaN	0.84835	NaN	NaN	0.6844	NaN	NaN	NaN	NaN	NaN	0.96134	NaN	NaN	NaN	NaN	NaN	0.74572	NaN	NaN	NaN	NaN	NaN	NaN	NaN
NaN	NaN	NaN	NaN	NaN	NaN	NaN	NaN	NaN	NaN	NaN	NaN	NaN	NaN	NaN	NaN	NaN	NaN	NaN	NaN	NaN	NaN	NaN	NaN	NaN	NaN	NaN	NaN	NaN	NaN	NaN	NaN	NaN	NaN	NaN	NaN	NaN	NaN	NaN	0.97311	NaN	NaN	NaN	NaN	NaN	NaN	NaN	NaN	NaN	NaN
NaN	NaN	NaN	NaN	NaN	NaN	NaN	NaN	NaN	NaN	NaN	NaN	NaN	NaN	NaN	NaN	NaN	NaN	NaN	NaN	NaN	NaN	NaN	NaN	NaN	NaN	NaN	NaN	NaN	NaN	NaN	NaN	NaN	NaN	NaN	NaN	NaN	NaN	NaN	NaN	NaN	NaN	NaN	NaN	NaN	NaN	NaN	NaN	NaN	NaN
NaN	NaN	NaN	NaN	NaN	NaN	NaN	NaN	NaN	NaN	NaN	NaN	NaN	NaN	NaN	NaN	NaN	NaN	NaN	NaN	NaN	NaN	NaN	NaN	NaN	NaN	NaN	NaN	NaN	NaN	NaN	NaN	NaN	NaN	NaN	NaN	NaN	NaN	NaN	NaN	NaN	NaN	NaN	NaN	NaN	NaN	NaN	NaN	NaN	NaN
0.90915	NaN	NaN	NaN	NaN	NaN	NaN	NaN	NaN	0.36982	NaN	NaN	NaN	NaN	NaN	NaN	NaN	NaN	NaN	NaN	NaN	NaN	NaN	NaN	NaN	NaN	NaN	NaN	NaN	NaN	NaN	NaN	NaN	NaN	NaN	NaN	NaN	NaN	NaN	NaN	NaN	NaN	NaN	NaN	NaN	NaN	NaN	NaN	NaN	NaN
NaN	NaN	NaN	NaN	NaN	NaN	NaN	NaN	NaN	NaN	NaN	NaN	NaN	NaN	NaN	NaN	NaN	NaN	NaN	NaN	NaN	NaN	NaN	NaN	NaN	NaN	NaN	NaN	NaN	NaN	NaN	NaN	NaN	NaN	NaN	NaN	NaN	NaN	NaN	NaN	NaN	NaN	NaN	NaN	NaN	NaN	NaN	NaN	NaN	NaN
1.0014	0.62244	0.80921	0.74282	1.3827	NaN	NaN	0.663	NaN	0.98205	0.54796	NaN	0.75559	0.48486	0.92533	1.0467	0.48234	NaN	0.75838	0.55085	NaN	NaN	0.665	NaN	0.93819	0.57604	NaN	0.6989	0.45401	NaN	NaN	0.66465	NaN	NaN	0.6504	NaN	0.76505	0.66813	NaN	0.5293	0.645	NaN	0.64453	0.85971	1.1579	1.0165	NaN	1.3028	NaN	0.86316
0.99757	1.0036	NaN	NaN	NaN	NaN	NaN	NaN	0.72688	1.4896	NaN	NaN	0.70302	0.7002	NaN	0.90742	0.66293	0.87001	0.7515	NaN	NaN	1.9213	NaN	NaN	1.0157	0.77086	NaN	0.70855	NaN	NaN	0.90492	0.8613	NaN	1.0471	0.89733	0.91689	0.81116	NaN	NaN	1.0041	NaN	0.94387	0.86035	NaN	NaN	NaN	NaN	NaN	NaN	NaN
NaN	NaN	NaN	NaN	NaN	NaN	NaN	NaN	NaN	NaN	NaN	NaN	NaN	0.68714	0.9558	NaN	NaN	NaN	NaN	NaN	NaN	NaN	NaN	NaN	NaN	NaN	NaN	NaN	NaN	0.80493	NaN	NaN	1.2132	NaN	NaN	NaN	NaN	NaN	NaN	NaN	NaN	NaN	NaN	NaN	NaN	NaN	NaN	NaN	1.4915	0.81314
NaN	NaN	NaN	NaN	NaN	NaN	NaN	NaN	NaN	NaN	NaN	NaN	NaN	NaN	NaN	NaN	NaN	NaN	NaN	NaN	NaN	NaN	NaN	NaN	NaN	NaN	NaN	NaN	NaN	NaN	NaN	NaN	NaN	NaN	NaN	NaN	NaN	NaN	NaN	NaN	NaN	NaN	NaN	NaN	NaN	NaN	NaN	NaN	NaN	NaN
NaN	NaN	NaN	NaN	NaN	NaN	NaN	NaN	NaN	NaN	NaN	NaN	NaN	NaN	NaN	NaN	NaN	NaN	NaN	NaN	NaN	NaN	NaN	NaN	NaN	NaN	NaN	NaN	NaN	NaN	NaN	NaN	NaN	NaN	NaN	NaN	NaN	NaN	NaN	NaN	NaN	NaN	NaN	NaN	NaN	NaN	NaN	NaN	NaN	NaN
NaN	NaN	NaN	NaN	NaN	NaN	NaN	NaN	NaN	NaN	NaN	NaN	NaN	NaN	NaN	NaN	NaN	NaN	NaN	NaN	NaN	NaN	NaN	NaN	NaN	NaN	NaN	NaN	NaN	NaN	NaN	NaN	NaN	NaN	NaN	NaN	NaN	NaN	NaN	NaN	NaN	NaN	NaN	NaN	NaN	NaN	NaN	NaN	NaN	NaN
NaN	NaN	NaN	NaN	NaN	NaN	NaN	NaN	NaN	NaN	NaN	NaN	NaN	NaN	NaN	NaN	NaN	NaN	NaN	NaN	NaN	NaN	NaN	NaN	NaN	NaN	NaN	NaN	NaN	NaN	NaN	NaN	NaN	NaN	NaN	NaN	NaN	NaN	NaN	NaN	NaN	NaN	NaN	NaN	NaN	NaN	NaN	NaN	NaN	NaN
NaN	NaN	NaN	NaN	NaN	NaN	NaN	NaN	NaN	NaN	NaN	NaN	NaN	NaN	NaN	NaN	NaN	NaN	NaN	NaN	NaN	NaN	NaN	NaN	NaN	NaN	NaN	NaN	NaN	NaN	NaN	NaN	NaN	NaN	NaN	NaN	NaN	NaN	NaN	NaN	NaN	NaN	NaN	NaN	NaN	NaN	NaN	NaN	NaN	NaN
0.87006	NaN	NaN	0.58508	NaN	NaN	NaN	NaN	NaN	0.58551	NaN	NaN	0.59587	NaN	NaN	0.80241	0.85536	NaN	0.67311	NaN	NaN	0.5453	NaN	NaN	0.72118	NaN	NaN	0.73273	NaN	NaN	NaN	NaN	NaN	NaN	NaN	NaN	0.93147	NaN	NaN	0.68559	NaN	NaN	0.89967	NaN	NaN	NaN	NaN	NaN	NaN	NaN
0.8921	NaN	NaN	NaN	0.82416	NaN	NaN	0.72729	NaN	0.68755	0.74773	0.77299	0.7194	0.69259	NaN	0.83191	NaN	NaN	0.80093	0.71609	NaN	NaN	NaN	NaN	0.90686	NaN	NaN	0.71057	NaN	NaN	0.86948	NaN	NaN	0.82408	NaN	NaN	0.77152	NaN	NaN	0.79401	1.1808	NaN	NaN	NaN	NaN	NaN	NaN	0.99234	NaN	1.2577
0.99933	0.76318	NaN	1.2888	0.82005	NaN	NaN	0.76467	NaN	0.89492	0.64053	NaN	0.90651	0.6502	NaN	1.0107	1.0813	NaN	0.78932	0.51321	NaN	0.68304	0.65459	NaN	0.88906	0.67733	NaN	0.77158	0.58029	NaN	0.75797	0.8025	NaN	0.72013	0.51119	NaN	0.69767	0.61655	NaN	0.78734	0.6199	NaN	0.80452	0.82404	NaN	1.0781	NaN	0.80671	NaN	0.65408
NaN	NaN	NaN	NaN	NaN	NaN	NaN	NaN	NaN	NaN	NaN	NaN	NaN	NaN	NaN	NaN	NaN	NaN	NaN	NaN	NaN	NaN	NaN	NaN	NaN	NaN	NaN	NaN	NaN	NaN	NaN	NaN	NaN	NaN	NaN	NaN	NaN	NaN	NaN	NaN	NaN	NaN	NaN	NaN	NaN	NaN	NaN	NaN	NaN	NaN
NaN	NaN	NaN	NaN	NaN	NaN	NaN	NaN	0.78451	NaN	NaN	NaN	NaN	NaN	NaN	NaN	NaN	NaN	NaN	NaN	NaN	NaN	NaN	NaN	NaN	NaN	1.3996	NaN	NaN	NaN	0.48418	NaN	NaN	NaN	NaN	NaN	NaN	NaN	NaN	NaN	NaN	NaN	NaN	NaN	NaN	0.80764	NaN	NaN	NaN	NaN
NaN	NaN	NaN	NaN	NaN	NaN	NaN	NaN	NaN	NaN	NaN	NaN	NaN	NaN	NaN	NaN	NaN	NaN	NaN	NaN	NaN	NaN	NaN	NaN	NaN	NaN	NaN	NaN	NaN	NaN	NaN	NaN	NaN	NaN	NaN	NaN	NaN	NaN	NaN	NaN	NaN	NaN	NaN	NaN	NaN	NaN	NaN	NaN	NaN	NaN
0.81991	0.67446	0.95139	0.63133	0.74453	1.0417	0.3887	0.57224	0.9307	0.67688	0.52606	0.78714	0.60853	0.64246	0.84902	0.84559	0.66582	0.90331	0.70664	0.59376	0.76736	0.56909	0.63973	0.93385	0.70914	0.66112	0.78949	0.73411	0.57973	0.76049	0.78146	0.68286	0.91563	0.74715	1.2945	0.90331	0.65781	0.68127	0.85021	0.84914	1.1493	0.97241	0.80152	1.0641	0.94282	1.0974	0.65104	1.3117	1.2837	1.2052
0.87377	0.70783	1.0379	0.5545	0.80877	1.2423	0.3417	0.70211	0.94453	0.67379	0.61417	0.87521	0.63355	0.74315	0.92242	0.8074	0.60978	1.0648	0.6895	0.67574	0.91142	0.60967	0.73374	0.9819	0.75989	0.7743	0.86963	0.73109	0.67006	0.77376	0.77106	0.75623	0.92013	0.72186	0.61107	0.90982	0.63839	0.80977	0.98659	0.81559	0.62725	1.0101	0.71889	0.70389	1.0244	1.0248	0.95877	0.69318	1.326	0.70271
NaN	NaN	NaN	NaN	NaN	NaN	NaN	NaN	NaN	NaN	NaN	NaN	NaN	NaN	NaN	NaN	NaN	NaN	NaN	NaN	NaN	NaN	NaN	NaN	NaN	NaN	NaN	NaN	NaN	NaN	NaN	NaN	NaN	NaN	NaN	NaN	NaN	NaN	NaN	NaN	NaN	NaN	NaN	NaN	NaN	NaN	NaN	NaN	NaN	NaN
0.94682	0.74299	1.0381	0.60508	0.7119	1.1132	0.38973	0.63437	0.82669	0.68339	0.67587	0.87956	0.60577	0.66284	1.0467	0.86449	0.58141	1.1204	0.67287	0.55314	0.97129	0.53661	0.77359	1.1214	0.7825	0.75879	0.94495	0.72701	0.67572	1.016	0.76374	0.80191	1.0251	0.70804	1.1484	0.98679	0.6233	0.76663	0.88282	0.86945	0.7757	1.1358	0.80297	0.8662	1.0333	1.1486	0.87743	0.83095	1.3387	0.80962
NaN	NaN	NaN	NaN	NaN	NaN	NaN	NaN	NaN	NaN	NaN	NaN	NaN	NaN	NaN	NaN	NaN	NaN	NaN	NaN	NaN	NaN	NaN	NaN	NaN	NaN	NaN	NaN	NaN	NaN	NaN	NaN	NaN	NaN	NaN	NaN	NaN	NaN	NaN	NaN	NaN	NaN	NaN	NaN	NaN	NaN	NaN	NaN	NaN	NaN
0.76366	0.72998	0.95868	0.59923	0.62313	1.2237	0.36936	0.53882	0.86652	0.62641	0.52635	0.58967	0.48116	0.53783	0.94333	0.66739	0.53601	0.8481	0.59543	0.57881	0.87252	0.55615	0.63796	0.90754	0.61324	0.55149	0.53346	0.5571	0.59819	0.73394	0.60945	0.65141	1.0192	0.64426	0.53415	0.97738	0.50907	0.62857	0.94541	0.88479	0.41355	0.93992	0.62106	0.5243	1.0105	0.93478	0.76266	0.48183	1.4885	0.34252
0.88308	0.84029	0.94871	0.69906	0.80032	1.0892	0.4088	0.67775	0.90887	0.72842	0.65681	0.75374	0.6754	0.64659	0.81631	0.91728	0.6575	0.855	0.75934	0.60361	0.811	0.6025	0.72461	0.90612	0.78568	0.74459	0.68952	0.80102	0.61221	0.73261	0.86048	0.78135	0.82748	0.85186	0.59261	0.77712	0.65505	0.79513	0.85617	0.83453	0.58746	0.83434	0.73221	0.67141	0.88484	1.0251	0.6495	0.64416	1.1435	0.71609
0.91318	0.87416	0.91525	0.73129	0.81891	1.0177	0.60705	0.72335	0.88968	0.76296	0.74642	0.69578	0.73843	0.69311	0.86498	0.92109	0.65276	0.8587	0.91089	0.70073	0.82438	0.64069	0.76795	0.95896	0.88257	0.78939	0.73503	0.85282	0.73599	0.7626	0.86142	0.81493	0.82745	0.79251	0.63797	0.9576	0.74968	0.79917	0.84496	0.87013	0.57794	0.93403	0.81261	0.76395	0.85449	1.1144	0.641	0.74836	1.1691	0.7573
NaN	0.83512	NaN	NaN	0.75598	NaN	NaN	0.63121	NaN	NaN	NaN	NaN	NaN	NaN	1.0256	NaN	NaN	0.87571	NaN	NaN	NaN	NaN	NaN	0.90295	NaN	NaN	0.56916	NaN	0.8006	0.73906	NaN	NaN	0.98384	NaN	NaN	0.93935	NaN	0.85056	0.77273	NaN	NaN	0.86201	NaN	NaN	0.95994	NaN	0.73658	NaN	1.3713	NaN
NaN	NaN	NaN	NaN	NaN	NaN	NaN	NaN	NaN	NaN	NaN	NaN	NaN	NaN	NaN	NaN	NaN	NaN	NaN	NaN	NaN	NaN	NaN	NaN	NaN	NaN	NaN	NaN	NaN	NaN	NaN	NaN	NaN	NaN	NaN	NaN	NaN	NaN	NaN	NaN	NaN	NaN	NaN	NaN	NaN	NaN	NaN	NaN	NaN	NaN
NaN	NaN	NaN	NaN	NaN	NaN	NaN	NaN	NaN	NaN	NaN	NaN	NaN	NaN	NaN	NaN	NaN	NaN	NaN	NaN	NaN	NaN	NaN	NaN	NaN	NaN	NaN	NaN	NaN	NaN	NaN	NaN	NaN	NaN	NaN	NaN	NaN	NaN	NaN	NaN	NaN	NaN	NaN	NaN	NaN	NaN	NaN	NaN	NaN	NaN
1.3743	0.8181	1.0488	NaN	0.72502	NaN	0.623	0.65935	1.1314	NaN	NaN	NaN	0.91112	0.65714	NaN	1.1129	0.58445	NaN	NaN	0.40602	NaN	0.91428	0.55994	NaN	NaN	0.6588	NaN	0.92414	0.68701	NaN	NaN	0.56753	NaN	1.2516	0.63508	NaN	0.78621	0.41965	0.91638	1.1101	0.4752	0.94482	1.0293	0.68527	0.87772	1.0095	0.7297	0.49579	1.1396	0.78102
NaN	NaN	NaN	NaN	NaN	NaN	NaN	NaN	NaN	NaN	NaN	NaN	NaN	NaN	NaN	NaN	NaN	NaN	NaN	NaN	NaN	NaN	NaN	NaN	NaN	NaN	NaN	NaN	NaN	NaN	NaN	NaN	NaN	NaN	NaN	NaN	NaN	NaN	NaN	NaN	NaN	NaN	NaN	NaN	NaN	NaN	NaN	NaN	NaN	NaN
0.90325	0.68992	1.0044	0.59732	0.73857	1.1302	0.39165	0.60607	0.86457	0.62464	0.63647	0.8342	0.61174	0.64831	0.84501	0.84711	0.63018	0.88564	0.68803	0.59267	0.85485	0.56312	0.69688	0.88573	0.752	0.71257	0.76851	0.71119	0.58542	0.77471	0.83325	0.75923	0.92414	0.72873	0.5659	0.91942	0.60542	0.71068	0.89445	0.76346	0.59688	0.95159	0.75912	0.65702	0.91382	1.0209	0.62957	0.62859	1.2971	0.69125
0.89925	0.76337	0.99884	0.62855	0.69843	1.205	0.36884	0.69556	0.97345	1.9203	0.54622	0.88977	0.81207	0.58115	1.0052	1.255	0.58913	1.0131	0.94173	0.73445	0.9284	2.1817	0.75312	1.0889	0.79728	0.53969	0.74827	0.98809	0.56885	0.71512	1.0524	0.76731	1.032	0.87795	0.50353	0.9952	0.73856	0.62733	1.0209	0.65261	0.35323	1.0307	0.54034	0.31665	0.81881	0.6073	0.83216	0.35641	1.4607	0.39129
0.87836	0.83351	0.96854	0.64798	0.78979	1.1074	0.36851	0.70275	0.94674	0.62278	0.61528	0.80437	0.66111	0.67943	0.84409	0.82435	0.63425	0.88297	0.72526	0.59274	0.84822	0.59904	0.71151	0.8986	0.81065	0.71409	0.77246	0.71453	0.59492	0.82607	0.74979	0.70468	0.84532	0.76342	0.63089	0.90299	0.63081	0.72847	0.88781	0.78129	0.63334	0.93088	0.69137	0.68525	0.90065	1.0086	0.69688	0.6614	1.2565	0.71824
NaN	0.55248	NaN	0.53367	0.73677	NaN	NaN	NaN	NaN	NaN	NaN	NaN	NaN	NaN	NaN	0.69315	0.68935	NaN	0.49428	NaN	NaN	NaN	NaN	NaN	NaN	NaN	NaN	NaN	NaN	NaN	NaN	NaN	NaN	0.46753	NaN	NaN	NaN	0.80604	NaN	NaN	NaN	NaN	0.6942	NaN	NaN	1.0047	NaN	NaN	NaN	NaN
0.93589	0.79344	0.99168	0.66612	0.71506	1.1358	0.42299	0.63166	0.8365	0.67102	0.6331	0.82215	0.66015	0.67139	0.864	0.862	0.66514	0.95116	0.74246	0.65492	0.8718	0.60505	0.7218	0.92458	0.80861	0.76713	0.74962	0.76998	0.62022	0.73465	0.83105	0.82837	0.87311	0.7793	0.66962	0.88535	0.67615	0.76448	0.89943	0.86364	0.65214	0.94019	0.7858	0.70514	0.86076	1.0791	0.68195	0.70489	1.2518	0.66488
0.97593	0.81681	NaN	0.71267	0.79222	NaN	0.39757	0.74427	0.98025	0.54014	0.63359	0.82449	0.68829	0.69698	0.99195	0.72219	0.70884	NaN	0.75092	0.6771	0.96787	0.56894	0.77113	NaN	0.79142	0.79744	NaN	0.75541	0.72459	0.75103	0.79427	0.85196	NaN	0.66329	0.59434	NaN	0.6936	0.76327	NaN	1.0463	0.67338	NaN	0.87008	0.74574	NaN	1.0163	NaN	0.77207	1.3492	0.50894
0.85718	0.8315	0.9921	0.69404	0.74716	1.4518	0.67314	0.70847	0.89764	0.75471	0.73947	1.0395	0.66559	0.78681	1.0433	1.0188	0.75596	0.96272	0.80145	0.71035	0.83988	0.64431	0.72194	1.1405	0.85754	0.8518	1.0335	0.75242	0.76748	1.0584	0.90018	0.88759	1.0386	0.7586	0.66648	0.94935	0.81706	0.84247	1.1327	0.80242	0.73586	1.1888	0.88362	0.84541	1.0387	1.1231	0.74461	0.78423	1.3043	0.75472
0.92513	1.6282	0.91276	1.0783	0.8546	1.5042	NaN	1.2025	1.11	0.65943	0.92242	0.89651	0.90376	1.222	0.88837	0.97063	1.0471	0.97468	0.73925	1.2719	1.0543	0.74375	1.0653	1.4399	0.72028	1.2683	1.0227	0.89074	0.71291	0.89514	1.0408	1.2767	NaN	1.0789	0.75246	1.3927	0.82441	1.0079	1.1477	1.0697	0.72621	1.2945	0.96042	0.87312	0.94375	1.1558	NaN	0.93965	1.3721	0.72785
0.88662	0.67008	0.96457	0.66963	0.6571	0.98508	0.44518	0.59896	0.80658	0.78531	0.48776	0.80938	0.71734	0.60022	0.93724	0.78623	0.54659	0.87104	0.80231	0.60409	0.84216	0.61943	0.66276	0.90934	0.76992	0.60617	0.72452	0.68575	0.54974	0.69458	0.73847	0.65083	0.8584	0.78455	0.7623	0.85382	0.54819	0.60947	0.86569	0.83617	0.68092	0.90341	0.72937	0.78952	0.88312	1.0762	0.67961	0.79053	1.135	0.87384
0.89693	0.81627	1.0281	0.75375	0.76538	1	0.39825	0.72179	0.95493	0.68816	0.67139	0.84508	0.64728	0.62187	0.96333	0.79551	0.65958	0.97604	0.81247	0.6416	0.85283	0.6154	0.82852	1.0038	0.77206	0.77751	0.81957	0.71446	0.62151	0.82856	0.73079	0.81144	0.97442	0.77731	0.68332	0.99166	0.58866	0.8084	0.97755	0.77938	0.68203	0.98803	0.72436	0.77798	0.96595	1.0617	0.71696	0.75867	1.4062	0.96092
1.0877	0.84779	1.0339	0.70895	0.80927	NaN	0.51082	0.69324	NaN	0.61524	0.58654	0.90349	0.79584	0.70559	0.99138	0.94934	0.73398	0.95156	0.58814	0.59576	0.80366	0.5063	0.69687	1.0517	0.74921	0.73414	1.0682	0.77715	0.59118	0.87441	0.89745	0.81583	1.0647	0.85024	0.62007	NaN	0.63218	0.78884	1.0515	0.66009	0.69455	1.1657	0.76018	0.76182	1.1588	1.1482	0.73257	0.68333	1.375	0.66269
0.89529	0.76689	1.0189	0.58316	0.83029	1.31	0.38497	0.7562	0.74763	0.70908	0.7422	0.87895	0.58188	0.72278	1.0038	0.82864	0.72512	0.96686	0.7117	0.67038	0.98448	0.51682	0.71067	0.97448	0.78648	0.78787	0.76073	0.72933	0.64045	0.98758	0.7088	0.85312	1.0529	0.8579	0.59996	1.0304	0.5777	0.78353	1.0908	0.7748	0.56543	1.1077	0.71954	0.67535	1.0248	1.1007	0.76676	0.62513	1.4252	0.70931
NaN	1.1901	NaN	1.4034	1.1926	0.94534	NaN	0.93052	1.3813	1.2157	NaN	1.007	1.2622	1.0327	NaN	1.2419	1.047	0.78601	NaN	NaN	NaN	NaN	NaN	0.8718	0.91432	NaN	0.56344	0.666	1.048	NaN	1.07	1.0326	NaN	0.29334	0.77083	NaN	NaN	1.4406	NaN	NaN	0.72564	NaN	NaN	NaN	NaN	1.5292	NaN	NaN	NaN	1.4629
0.91688	0.87787	1.0708	0.60374	0.84835	1.4161	0.41779	0.88913	NaN	0.67442	0.724	NaN	0.66363	0.76144	1.0422	0.81935	0.69506	NaN	0.69717	0.66823	1.0453	0.62789	0.72761	NaN	0.79913	0.83701	NaN	0.76296	0.68408	NaN	0.74983	0.84742	NaN	0.84124	0.82085	0.88679	0.69355	0.79704	1.3289	0.87232	0.99062	NaN	0.9642	0.70567	NaN	1.2294	NaN	0.66461	NaN	0.84575
0.85563	0.75083	1.0431	0.69685	0.75568	1.1877	0.40956	0.72837	0.97398	0.64587	0.71851	0.81174	0.6429	0.79068	1.0049	0.85482	0.7235	0.98396	0.72331	0.69984	0.76129	0.59746	0.76002	1.0289	0.70041	0.73677	0.81663	0.71087	0.80451	0.84232	0.79404	0.8799	0.91808	0.76874	0.71105	1.0526	0.64827	0.70539	0.77494	0.82905	0.66514	0.937	0.83151	0.66285	0.91708	1.0369	0.74291	0.74999	1.4566	0.80933
NaN	0.84951	1.0674	NaN	NaN	NaN	NaN	0.67746	0.8504	1.3487	0.651	NaN	NaN	NaN	NaN	NaN	NaN	0.71629	NaN	0.70458	NaN	NaN	0.55182	1.0058	1.0478	NaN	0.89985	NaN	NaN	NaN	NaN	NaN	NaN	NaN	0.36432	1.2847	NaN	NaN	NaN	1.126	NaN	0.92234	NaN	0.52501	0.73867	NaN	0.55081	NaN	1.0414	NaN
0.70349	0.79186	NaN	0.69967	1.1525	NaN	NaN	1.028	NaN	1.1087	1.3438	NaN	NaN	0.94199	NaN	1.0506	NaN	NaN	NaN	0.7236	NaN	NaN	NaN	NaN	NaN	NaN	NaN	NaN	0.92005	NaN	NaN	NaN	NaN	1.0565	NaN	NaN	NaN	NaN	NaN	0.82793	NaN	NaN	NaN	NaN	NaN	NaN	NaN	NaN	NaN	NaN
0.70241	NaN	NaN	NaN	NaN	NaN	NaN	NaN	NaN	NaN	NaN	NaN	NaN	NaN	NaN	NaN	NaN	NaN	NaN	NaN	NaN	NaN	1.3462	NaN	NaN	NaN	NaN	NaN	NaN	NaN	0.7217	NaN	NaN	0.65996	NaN	NaN	NaN	NaN	NaN	NaN	NaN	NaN	NaN	NaN	NaN	1.9708	NaN	NaN	NaN	1.172
NaN	NaN	NaN	NaN	NaN	NaN	NaN	NaN	NaN	NaN	NaN	NaN	NaN	NaN	NaN	NaN	NaN	NaN	NaN	NaN	NaN	NaN	NaN	NaN	NaN	NaN	NaN	NaN	NaN	NaN	NaN	NaN	NaN	NaN	NaN	NaN	NaN	NaN	NaN	NaN	NaN	NaN	NaN	NaN	NaN	NaN	NaN	NaN	NaN	NaN
NaN	NaN	NaN	NaN	NaN	NaN	NaN	NaN	NaN	NaN	NaN	NaN	NaN	NaN	NaN	NaN	NaN	NaN	NaN	NaN	NaN	NaN	NaN	NaN	NaN	NaN	NaN	NaN	NaN	NaN	NaN	NaN	NaN	NaN	NaN	NaN	NaN	NaN	NaN	NaN	NaN	NaN	NaN	NaN	NaN	NaN	NaN	NaN	NaN	NaN
NaN	NaN	NaN	NaN	NaN	NaN	NaN	NaN	NaN	NaN	NaN	NaN	NaN	NaN	NaN	NaN	NaN	NaN	NaN	NaN	NaN	NaN	NaN	NaN	NaN	NaN	NaN	NaN	NaN	NaN	NaN	NaN	NaN	NaN	NaN	NaN	NaN	NaN	NaN	NaN	NaN	NaN	NaN	NaN	NaN	NaN	NaN	NaN	NaN	NaN
0.99557	NaN	NaN	0.69972	0.70699	NaN	0.41753	NaN	NaN	0.60679	NaN	NaN	0.6731	0.72093	NaN	0.91852	NaN	NaN	0.67967	NaN	NaN	0.76527	0.67665	NaN	0.84772	0.56832	NaN	1.0002	NaN	NaN	0.83844	NaN	NaN	0.77252	NaN	NaN	0.67007	NaN	NaN	NaN	0.50867	NaN	0.90469	NaN	NaN	NaN	NaN	NaN	NaN	NaN
0.78677	NaN	NaN	NaN	0.68951	NaN	NaN	NaN	NaN	NaN	NaN	NaN	NaN	0.78528	NaN	0.76986	NaN	NaN	NaN	NaN	NaN	NaN	NaN	NaN	NaN	NaN	NaN	NaN	NaN	NaN	0.93642	NaN	NaN	0.76817	NaN	NaN	NaN	NaN	NaN	0.91259	NaN	NaN	NaN	NaN	NaN	NaN	NaN	1.1231	NaN	NaN
NaN	NaN	NaN	NaN	NaN	NaN	NaN	NaN	NaN	NaN	NaN	NaN	NaN	NaN	NaN	NaN	NaN	NaN	NaN	NaN	NaN	NaN	NaN	NaN	NaN	NaN	NaN	NaN	NaN	NaN	NaN	NaN	NaN	NaN	NaN	NaN	NaN	NaN	NaN	NaN	NaN	NaN	NaN	NaN	NaN	NaN	NaN	NaN	NaN	NaN
0.93703	0.73964	1.001	0.72646	0.87033	1.1284	0.45121	0.75642	0.86506	0.68961	0.73858	0.84263	0.70411	0.69652	0.95769	0.91947	0.80855	0.98885	0.75485	0.67119	0.87293	0.65721	0.77776	1.0577	0.79962	0.80583	0.87208	0.75652	0.77806	0.78117	0.73226	0.83574	0.95598	0.83302	0.57241	1.0442	0.64974	0.79662	0.99659	0.83116	0.61289	1.0345	0.77707	0.75387	0.89727	1.0922	0.86534	0.75819	1.4274	0.71096
1.1125	0.84481	1.0651	0.71084	0.83016	1.1772	0.45543	0.82663	0.8431	0.92325	0.65568	0.96062	0.7022	0.73502	1.2102	0.85817	0.67705	1.226	0.93871	0.66809	1.0258	0.81394	0.79667	1.2633	0.99561	0.82024	0.88927	0.95963	0.66708	0.90927	0.81021	0.85362	1.0296	0.8209	0.6299	1.0306	0.66698	0.79174	1.0043	1.0014	0.60895	1.1372	0.86786	0.72281	0.99041	1.052	0.75764	0.70683	1.371	0.74457
NaN	NaN	NaN	NaN	NaN	NaN	NaN	NaN	NaN	NaN	NaN	NaN	NaN	NaN	NaN	NaN	NaN	NaN	NaN	NaN	NaN	NaN	NaN	NaN	NaN	NaN	NaN	NaN	NaN	NaN	NaN	NaN	NaN	NaN	NaN	NaN	NaN	NaN	NaN	NaN	NaN	NaN	NaN	NaN	NaN	NaN	NaN	NaN	NaN	NaN
NaN	NaN	NaN	NaN	NaN	NaN	NaN	NaN	NaN	NaN	NaN	NaN	NaN	NaN	NaN	0.71598	NaN	NaN	NaN	0.72867	NaN	NaN	0.7991	NaN	NaN	0.78483	NaN	1.0113	NaN	NaN	NaN	0.7699	NaN	NaN	NaN	NaN	NaN	0.81429	NaN	NaN	NaN	NaN	1.1386	NaN	NaN	0.96282	NaN	NaN	NaN	NaN
NaN	NaN	NaN	NaN	NaN	NaN	NaN	NaN	NaN	NaN	NaN	NaN	NaN	NaN	NaN	NaN	NaN	NaN	NaN	NaN	NaN	NaN	NaN	NaN	NaN	NaN	NaN	NaN	NaN	NaN	NaN	NaN	NaN	NaN	NaN	NaN	NaN	NaN	NaN	NaN	NaN	NaN	NaN	NaN	NaN	NaN	NaN	NaN	NaN	NaN
0.87854	0.73318	0.92389	0.61032	0.766	1.1128	0.39277	0.66741	0.86724	0.66597	0.62539	0.93544	0.61059	0.71548	0.99662	0.87306	0.71111	1.0364	0.71623	0.60446	0.84051	0.58113	0.72597	1.0296	0.74954	0.69245	0.79641	0.72635	0.64036	0.81754	0.77406	0.80078	0.95131	0.74202	0.7575	0.99387	0.61141	0.77957	1.0538	0.78208	0.70187	1.0378	0.73448	0.87789	1.0223	1.1248	0.73952	0.70278	1.3174	0.84243
0.84303	NaN	NaN	NaN	NaN	NaN	0.32216	NaN	NaN	0.78795	NaN	NaN	0.62966	NaN	NaN	0.75153	0.80811	NaN	0.6726	NaN	NaN	0.63467	0.70408	NaN	0.74505	NaN	NaN	0.76563	0.56485	NaN	0.77193	NaN	NaN	0.85329	NaN	NaN	0.52281	NaN	NaN	0.81231	NaN	NaN	0.81858	NaN	NaN	NaN	NaN	0.88962	NaN	NaN
0.863	0.7013	1.1576	0.61448	0.76547	1.1709	0.34902	0.65176	0.88574	0.76187	0.62988	0.78567	0.60005	0.75939	0.91592	0.7847	0.65247	0.95635	0.92909	0.60943	0.90072	0.59914	0.69506	0.9593	0.74732	0.81406	0.60733	0.66583	0.62512	0.87061	0.72511	0.71325	0.95854	0.72289	0.6266	1.1122	0.6095	0.72834	0.90025	0.76135	0.61049	1.0935	0.64932	0.65584	1.0143	1.0098	0.87173	0.64851	1.3771	0.59728
NaN	NaN	NaN	NaN	NaN	NaN	NaN	NaN	NaN	NaN	NaN	NaN	NaN	NaN	NaN	NaN	NaN	NaN	NaN	NaN	NaN	NaN	NaN	NaN	NaN	NaN	NaN	NaN	NaN	NaN	NaN	NaN	NaN	NaN	NaN	NaN	NaN	NaN	NaN	NaN	NaN	NaN	NaN	NaN	NaN	NaN	NaN	NaN	NaN	NaN
NaN	NaN	NaN	NaN	NaN	NaN	NaN	NaN	NaN	NaN	NaN	NaN	NaN	NaN	NaN	NaN	NaN	NaN	NaN	NaN	NaN	NaN	NaN	NaN	NaN	NaN	NaN	NaN	NaN	NaN	NaN	NaN	NaN	NaN	NaN	NaN	NaN	NaN	NaN	NaN	NaN	NaN	NaN	NaN	NaN	NaN	NaN	NaN	NaN	NaN
0.7977	0.7971	0.90174	0.57762	0.81324	1.0479	0.41638	0.85299	0.81718	0.77245	0.6822	1.4273	0.57766	0.81175	0.86485	0.84296	0.72264	0.87306	0.73991	0.6206	0.84501	0.55793	0.72846	0.87232	0.7904	0.82654	1.2388	0.7627	0.67505	0.77061	0.7114	0.89417	0.95329	0.75496	0.64817	1.0744	0.62628	0.8001	0.92265	0.80092	0.75478	1.0862	0.73253	0.79372	0.89781	1.1774	0.699	0.80851	1.1913	0.75183
0.85568	0.72491	0.94062	0.62239	0.66514	1.0709	0.39734	0.63848	0.99973	0.69845	0.70901	0.88304	0.61921	0.7012	1.0619	0.85153	0.64044	0.82719	0.69005	0.64845	0.87815	0.56493	0.70948	1.0103	0.81468	0.73958	0.90507	0.76067	0.63358	0.79273	0.90925	0.78105	0.88334	0.75326	0.66734	0.92806	0.59489	0.77263	0.84831	0.80866	0.67894	0.95382	0.73806	0.77732	0.96241	0.97323	0.69611	0.72591	1.3199	0.77267
0.85558	NaN	NaN	NaN	NaN	NaN	NaN	NaN	NaN	NaN	NaN	NaN	0.66185	NaN	NaN	NaN	NaN	NaN	NaN	NaN	NaN	1.0535	NaN	1.1097	NaN	NaN	1.1576	NaN	0.46643	NaN	NaN	NaN	NaN	NaN	NaN	1.0258	NaN	NaN	NaN	0.855	NaN	1.1546	0.78394	NaN	0.75157	NaN	NaN	NaN	NaN	NaN
NaN	NaN	NaN	NaN	NaN	NaN	NaN	NaN	NaN	NaN	NaN	NaN	NaN	NaN	NaN	NaN	NaN	NaN	NaN	NaN	NaN	NaN	NaN	NaN	NaN	NaN	NaN	NaN	NaN	NaN	NaN	NaN	NaN	NaN	NaN	NaN	NaN	NaN	NaN	NaN	NaN	NaN	NaN	NaN	NaN	NaN	NaN	NaN	NaN	NaN
0.86388	0.72893	1.0308	0.54909	0.7725	1.0228	0.38642	0.67519	0.81262	0.64262	0.67673	1.055	0.63748	0.70418	0.98597	0.77603	0.63687	0.93516	0.74776	0.60837	0.87336	0.64505	0.69278	0.952	0.81133	0.73121	1.042	0.6951	0.62304	0.95278	0.87681	0.83189	0.93184	0.83317	0.61912	1.0929	0.60649	0.70957	1.1044	0.8305	0.61811	1.2397	0.78956	0.86594	0.96933	1.0239	1.0203	0.53984	1.6073	0.86509
0.58754	NaN	NaN	0.93714	NaN	NaN	NaN	NaN	NaN	NaN	NaN	NaN	NaN	0.6468	NaN	NaN	NaN	NaN	NaN	NaN	NaN	NaN	NaN	NaN	0.63512	NaN	NaN	0.75668	NaN	NaN	NaN	NaN	NaN	NaN	NaN	NaN	NaN	NaN	NaN	NaN	NaN	NaN	0.55842	NaN	NaN	1.0723	NaN	NaN	NaN	NaN
0.8306	0.71515	0.92833	0.61523	0.76751	1.4621	0.34319	0.49701	NaN	0.65781	0.55505	0.73077	0.6389	0.53267	0.90606	0.87498	0.54672	1.0637	0.73757	0.56164	0.87883	0.61378	0.68085	1.1088	0.70554	0.71477	0.74946	0.71025	NaN	NaN	0.72926	0.67828	0.92961	0.71878	0.53658	NaN	0.72747	0.77266	NaN	0.84818	0.56955	NaN	0.78356	0.67322	1.029	0.83341	0.69199	0.6794	1.5504	0.67341
NaN	NaN	NaN	NaN	NaN	NaN	NaN	NaN	NaN	NaN	NaN	NaN	NaN	NaN	NaN	NaN	NaN	NaN	NaN	NaN	NaN	NaN	NaN	NaN	NaN	NaN	NaN	NaN	NaN	NaN	NaN	NaN	NaN	NaN	NaN	NaN	NaN	NaN	NaN	NaN	NaN	NaN	NaN	NaN	NaN	NaN	NaN	NaN	NaN	NaN
NaN	NaN	NaN	NaN	NaN	NaN	NaN	NaN	NaN	NaN	NaN	NaN	NaN	NaN	NaN	NaN	NaN	NaN	NaN	NaN	NaN	NaN	NaN	NaN	NaN	NaN	NaN	NaN	NaN	NaN	NaN	NaN	NaN	NaN	NaN	NaN	NaN	NaN	NaN	NaN	NaN	NaN	NaN	NaN	NaN	NaN	NaN	NaN	NaN	NaN
1.3558	0.8679	0.98088	0.85591	0.55772	0.97453	0.66828	0.6696	NaN	1.0347	0.6368	NaN	0.8107	0.78702	NaN	1.3335	0.52596	NaN	NaN	0.65334	NaN	1.0565	0.62788	NaN	1.0978	0.7302	0.70168	0.63401	0.6083	NaN	0.63908	0.77318	NaN	1.2174	0.79818	1.1425	0.71184	0.79847	NaN	0.57571	0.57442	NaN	0.78973	0.73186	0.78469	1.0263	NaN	0.89636	NaN	0.71501
NaN	NaN	NaN	NaN	NaN	NaN	NaN	NaN	NaN	NaN	NaN	NaN	NaN	NaN	NaN	NaN	NaN	NaN	NaN	NaN	NaN	NaN	NaN	NaN	NaN	NaN	NaN	NaN	NaN	NaN	NaN	NaN	NaN	NaN	NaN	NaN	NaN	NaN	NaN	NaN	NaN	NaN	NaN	NaN	NaN	NaN	NaN	NaN	NaN	NaN
NaN	NaN	NaN	NaN	NaN	NaN	NaN	NaN	NaN	NaN	NaN	NaN	NaN	NaN	NaN	NaN	NaN	NaN	NaN	NaN	NaN	NaN	NaN	NaN	NaN	NaN	NaN	NaN	NaN	NaN	NaN	NaN	NaN	NaN	NaN	NaN	NaN	NaN	NaN	NaN	NaN	NaN	1.3105	NaN	NaN	NaN	NaN	NaN	NaN	NaN
NaN	NaN	NaN	NaN	NaN	NaN	NaN	NaN	NaN	NaN	NaN	NaN	NaN	NaN	NaN	NaN	NaN	NaN	NaN	NaN	NaN	NaN	NaN	NaN	NaN	NaN	NaN	NaN	NaN	NaN	NaN	NaN	NaN	NaN	NaN	NaN	NaN	NaN	NaN	NaN	NaN	NaN	NaN	NaN	NaN	NaN	NaN	NaN	NaN	NaN
NaN	NaN	NaN	NaN	NaN	NaN	NaN	NaN	NaN	NaN	NaN	NaN	NaN	NaN	NaN	NaN	NaN	NaN	NaN	NaN	NaN	NaN	NaN	NaN	NaN	NaN	NaN	NaN	0.69827	NaN	NaN	NaN	NaN	NaN	NaN	NaN	NaN	NaN	NaN	NaN	0.49099	NaN	NaN	NaN	NaN	NaN	NaN	NaN	NaN	NaN
NaN	NaN	NaN	NaN	NaN	NaN	NaN	NaN	NaN	NaN	NaN	NaN	NaN	NaN	NaN	NaN	NaN	NaN	NaN	NaN	NaN	NaN	0.63214	NaN	NaN	NaN	NaN	NaN	NaN	NaN	NaN	NaN	NaN	0.85621	0.42806	NaN	0.58214	NaN	NaN	NaN	0.58961	NaN	NaN	NaN	NaN	NaN	NaN	0.50343	NaN	NaN
0.74133	NaN	NaN	0.98437	NaN	NaN	0.31861	NaN	NaN	0.975	NaN	NaN	0.67678	0.56342	NaN	1.3789	NaN	NaN	0.70139	NaN	NaN	0.70343	NaN	NaN	0.59348	NaN	NaN	NaN	0.91865	1.0293	NaN	NaN	NaN	NaN	NaN	NaN	0.53751	NaN	NaN	0.85678	NaN	NaN	0.78756	NaN	NaN	NaN	NaN	0.9595	NaN	NaN
0.77815	0.95055	1.0249	0.62528	0.61373	1.3615	0.3519	0.62728	1.0036	1.8419	0.60596	0.9753	0.5925	0.64973	1.0651	1.0978	0.64702	0.93742	0.70221	0.63965	0.79141	1.9697	0.88032	1.1082	0.66153	0.59941	0.82983	0.7816	0.97222	0.68945	0.85658	0.77965	1.1253	0.78684	0.49397	0.79715	0.77597	0.69679	0.86977	0.75234	0.49637	1.0852	NaN	0.40156	0.9266	0.64864	0.74878	0.41269	1.4275	0.43387
0.87487	NaN	NaN	0.6463	NaN	NaN	NaN	NaN	NaN	NaN	NaN	NaN	NaN	NaN	NaN	NaN	NaN	NaN	0.64384	NaN	NaN	NaN	NaN	NaN	NaN	NaN	NaN	NaN	NaN	NaN	NaN	NaN	NaN	NaN	NaN	NaN	NaN	NaN	NaN	1.5651	NaN	NaN	NaN	NaN	NaN	1.1158	NaN	NaN	NaN	NaN
NaN	NaN	NaN	0.87699	NaN	NaN	NaN	NaN	NaN	NaN	NaN	NaN	0.47679	NaN	NaN	NaN	NaN	NaN	0.48787	NaN	NaN	NaN	NaN	NaN	NaN	NaN	0.77192	NaN	NaN	NaN	NaN	NaN	NaN	NaN	NaN	NaN	NaN	NaN	NaN	NaN	NaN	NaN	0.68523	NaN	NaN	NaN	NaN	NaN	NaN	NaN
NaN	NaN	NaN	NaN	NaN	NaN	NaN	NaN	NaN	NaN	NaN	NaN	NaN	NaN	NaN	NaN	NaN	NaN	NaN	NaN	NaN	NaN	NaN	NaN	NaN	NaN	NaN	NaN	NaN	NaN	NaN	NaN	NaN	NaN	NaN	NaN	NaN	NaN	NaN	NaN	NaN	NaN	NaN	NaN	NaN	NaN	NaN	NaN	NaN	NaN
0.95551	0.46092	NaN	0.54888	NaN	1.0117	0.38086	NaN	0.62574	0.8042	NaN	0.67177	1.0439	0.62843	0.82004	0.74585	NaN	0.91835	0.65618	0.70213	0.91333	NaN	NaN	0.99795	1.0564	NaN	0.8774	0.84524	NaN	0.87642	0.79213	NaN	0.82774	NaN	NaN	0.8966	0.7074	0.86833	0.89656	0.83961	0.47911	1.1495	1.0162	NaN	0.96588	NaN	NaN	0.52383	1.2152	0.63585
NaN	NaN	NaN	NaN	NaN	NaN	NaN	NaN	NaN	NaN	NaN	NaN	NaN	NaN	NaN	NaN	NaN	NaN	NaN	NaN	NaN	NaN	NaN	NaN	NaN	NaN	NaN	NaN	NaN	NaN	NaN	NaN	NaN	NaN	NaN	NaN	NaN	NaN	NaN	NaN	NaN	NaN	NaN	NaN	NaN	NaN	NaN	NaN	NaN	NaN
0.7779	0.73837	1.0474	0.78798	0.72915	1.3928	0.46505	0.82851	1.2344	0.92033	0.77204	NaN	0.67647	0.67132	NaN	0.87952	0.69867	NaN	0.79477	0.67772	1.1775	0.51282	0.62357	1.3567	0.84759	0.83673	0.81612	0.80572	0.8046	NaN	0.77897	0.66758	0.86641	0.83961	0.77329	NaN	0.6371	0.60425	0.84639	0.73168	0.73885	0.97178	0.78809	0.6598	NaN	1.1676	0.69634	0.72627	NaN	0.72134
NaN	NaN	NaN	NaN	NaN	NaN	NaN	NaN	NaN	NaN	NaN	NaN	NaN	NaN	NaN	NaN	NaN	NaN	NaN	NaN	NaN	NaN	NaN	NaN	NaN	NaN	NaN	NaN	NaN	NaN	NaN	NaN	NaN	NaN	NaN	NaN	NaN	NaN	NaN	NaN	NaN	NaN	NaN	NaN	NaN	NaN	NaN	NaN	NaN	NaN
0.91743	0.90826	1.1716	0.7594	0.6762	1.0492	0.44377	NaN	NaN	0.74326	0.46716	0.85615	0.59625	0.58858	NaN	0.82872	NaN	NaN	0.81903	0.5751	0.88996	0.64426	0.70633	0.74441	0.82243	0.63289	0.67162	0.74195	NaN	NaN	0.78521	0.79817	0.95262	0.80846	0.62508	0.8012	0.62401	0.62239	NaN	0.77759	0.65234	NaN	0.85983	0.47289	0.73126	0.97239	0.61504	1.1177	NaN	0.86623
NaN	NaN	NaN	NaN	NaN	NaN	NaN	NaN	NaN	NaN	NaN	NaN	NaN	NaN	NaN	NaN	NaN	NaN	NaN	NaN	NaN	NaN	NaN	NaN	NaN	NaN	NaN	NaN	NaN	NaN	NaN	NaN	NaN	NaN	NaN	NaN	NaN	NaN	NaN	NaN	NaN	NaN	NaN	NaN	NaN	NaN	NaN	NaN	NaN	NaN
NaN	NaN	NaN	NaN	NaN	NaN	NaN	NaN	NaN	NaN	NaN	NaN	NaN	NaN	NaN	NaN	NaN	NaN	NaN	NaN	NaN	NaN	NaN	NaN	NaN	NaN	NaN	NaN	NaN	NaN	NaN	NaN	NaN	NaN	NaN	NaN	NaN	NaN	NaN	NaN	NaN	NaN	NaN	NaN	NaN	NaN	NaN	NaN	NaN	NaN
NaN	NaN	NaN	NaN	NaN	NaN	NaN	NaN	NaN	NaN	NaN	NaN	NaN	NaN	NaN	NaN	NaN	NaN	NaN	NaN	NaN	NaN	NaN	NaN	NaN	NaN	NaN	NaN	NaN	NaN	NaN	NaN	NaN	NaN	NaN	NaN	NaN	NaN	NaN	NaN	NaN	NaN	NaN	NaN	NaN	NaN	NaN	NaN	NaN	NaN
NaN	NaN	NaN	NaN	NaN	NaN	NaN	NaN	NaN	NaN	NaN	NaN	NaN	NaN	NaN	NaN	NaN	NaN	NaN	NaN	NaN	NaN	NaN	NaN	NaN	NaN	NaN	NaN	NaN	NaN	NaN	NaN	NaN	NaN	NaN	NaN	NaN	NaN	NaN	NaN	NaN	NaN	NaN	NaN	NaN	NaN	NaN	NaN	NaN	NaN
NaN	NaN	NaN	NaN	NaN	NaN	NaN	NaN	NaN	NaN	NaN	NaN	NaN	NaN	NaN	NaN	NaN	NaN	NaN	NaN	NaN	NaN	NaN	NaN	NaN	NaN	NaN	NaN	NaN	NaN	NaN	NaN	NaN	NaN	NaN	NaN	NaN	NaN	NaN	NaN	NaN	NaN	NaN	NaN	NaN	NaN	NaN	NaN	NaN	NaN
0.81742	0.73376	1.0404	0.66877	0.72317	0.91363	0.35106	0.64086	0.89248	0.7574	0.61101	0.75817	0.59574	0.6982	0.93909	0.85417	0.57752	0.92874	0.63144	0.55137	0.69228	0.62292	0.64518	0.78209	0.61816	0.61598	0.44524	0.42876	0.57731	0.58094	0.43087	0.66975	0.70419	0.23926	0.36454	0.36605	0.13022	0.25536	NaN	0.11728	0.14849	NaN	0.12561	0.1356	NaN	0.14148	NaN	0.11831	0.29835	0.097553
NaN	NaN	NaN	NaN	NaN	NaN	NaN	NaN	NaN	1.329	NaN	NaN	NaN	NaN	NaN	NaN	NaN	NaN	NaN	NaN	NaN	NaN	NaN	NaN	NaN	NaN	NaN	NaN	NaN	NaN	NaN	NaN	NaN	NaN	NaN	NaN	NaN	NaN	NaN	NaN	NaN	NaN	NaN	NaN	NaN	NaN	NaN	NaN	NaN	NaN
NaN	NaN	NaN	NaN	NaN	NaN	NaN	NaN	NaN	NaN	NaN	NaN	NaN	NaN	NaN	0.89276	NaN	NaN	NaN	NaN	NaN	NaN	NaN	NaN	NaN	NaN	NaN	NaN	NaN	NaN	0.79777	NaN	NaN	NaN	NaN	NaN	NaN	NaN	NaN	NaN	NaN	NaN	NaN	NaN	NaN	NaN	NaN	NaN	NaN	NaN
0.86457	NaN	NaN	NaN	0.92765	1.3316	NaN	NaN	NaN	NaN	NaN	NaN	NaN	0.86946	NaN	NaN	NaN	NaN	NaN	NaN	NaN	0.49381	0.70084	NaN	NaN	0.6677	NaN	0.47178	NaN	0.51733	NaN	0.93478	NaN	0.72581	NaN	NaN	NaN	NaN	NaN	NaN	0.57857	1.2197	NaN	NaN	NaN	NaN	NaN	0.79501	NaN	NaN
NaN	NaN	NaN	NaN	NaN	NaN	NaN	NaN	NaN	NaN	NaN	NaN	NaN	NaN	NaN	NaN	NaN	NaN	NaN	NaN	NaN	NaN	NaN	NaN	NaN	NaN	NaN	NaN	NaN	NaN	NaN	NaN	NaN	NaN	NaN	NaN	NaN	NaN	NaN	NaN	NaN	NaN	NaN	NaN	NaN	NaN	NaN	NaN	NaN	NaN
1.0424	NaN	NaN	NaN	NaN	NaN	NaN	NaN	NaN	0.66243	NaN	NaN	NaN	NaN	NaN	NaN	NaN	NaN	0.58508	1.0881	NaN	NaN	1.1734	NaN	NaN	0.7058	NaN	NaN	NaN	NaN	1.015	0.82645	NaN	NaN	0.92286	NaN	NaN	NaN	NaN	NaN	NaN	NaN	NaN	NaN	NaN	NaN	NaN	1.3884	NaN	NaN
NaN	NaN	NaN	NaN	NaN	NaN	NaN	NaN	NaN	NaN	NaN	NaN	NaN	NaN	NaN	NaN	NaN	NaN	NaN	NaN	NaN	NaN	NaN	NaN	NaN	NaN	NaN	NaN	NaN	NaN	NaN	NaN	NaN	NaN	NaN	NaN	NaN	NaN	NaN	NaN	NaN	NaN	NaN	NaN	NaN	NaN	NaN	NaN	NaN	NaN
NaN	NaN	NaN	NaN	NaN	NaN	NaN	NaN	NaN	NaN	NaN	NaN	NaN	NaN	NaN	NaN	NaN	NaN	NaN	NaN	NaN	NaN	NaN	NaN	NaN	NaN	NaN	NaN	NaN	NaN	NaN	NaN	NaN	NaN	NaN	NaN	NaN	NaN	NaN	NaN	NaN	NaN	NaN	NaN	NaN	NaN	NaN	NaN	NaN	NaN
0.85883	0.82149	0.93754	0.64182	0.78152	1.0686	0.38425	0.67241	0.90914	0.6859	0.67022	0.88732	0.65289	0.70779	0.95104	0.87813	0.67512	0.97738	0.74555	0.64274	0.78605	0.57812	0.75701	0.98869	0.73785	0.80133	0.86059	0.70587	0.64048	0.77754	0.79215	0.81768	0.89392	0.76374	0.67023	0.97647	0.64257	0.83843	0.96664	0.80764	0.68754	0.99586	0.73143	0.78476	0.9204	1.2642	0.73969	0.72989	1.2007	0.78717
0.8962	0.7324	0.97029	0.63538	0.71182	1.1145	0.38451	0.61028	0.84766	0.65703	0.60118	0.96767	0.64424	0.64446	0.98159	0.85939	0.61454	1.064	0.70129	0.56661	0.92526	0.59258	0.64992	1.0206	0.77357	0.67929	0.96628	0.71857	0.60238	0.89819	0.78935	0.72931	0.9799	0.74898	0.59677	1.0371	0.62541	0.70372	1.0322	0.79917	0.62649	1.0719	0.74254	0.71695	0.93926	0.99827	0.77588	0.68467	1.4755	0.70216
0.83668	0.76384	1.0041	0.59487	0.73701	1.1227	0.34459	0.64013	0.90953	0.66665	0.63961	0.861	0.61526	0.64187	0.96406	0.77061	0.66124	0.95621	0.60118	0.61361	0.90128	0.55478	0.75296	1.0052	0.68779	0.70276	0.80134	0.68289	0.58928	0.77322	0.72739	0.81439	0.93456	0.71838	0.7059	1.043	0.58896	0.77754	0.94631	0.73879	0.81892	0.99686	0.68157	0.75715	0.91865	1.0824	0.73619	0.82834	1.3761	0.82967
0.89634	0.76846	0.95769	0.60689	0.78679	1.0912	0.37913	0.63897	0.8284	0.63615	0.65043	0.78821	0.60382	0.68847	0.91065	0.83675	0.64969	0.92015	0.69871	0.62393	0.84027	0.61005	0.67039	0.92484	0.74376	0.69386	0.79605	0.69542	0.63631	0.76753	0.7524	0.79654	0.88517	0.70839	0.58019	0.89471	0.60109	0.73102	0.90694	0.80477	0.62962	0.93662	0.72994	0.72957	0.93737	1.0271	0.72752	0.6582	1.275	0.72895
0.86248	0.72928	0.92568	0.61973	0.77376	1.0333	0.33958	0.66064	0.85374	0.61657	0.62648	0.78575	0.58741	0.64861	0.92449	0.81708	0.63208	0.95192	0.71696	0.56514	0.86855	0.61441	0.70369	0.98425	0.73669	0.68648	0.81371	0.68536	0.61466	0.78237	0.7772	0.73089	0.96238	0.75652	0.61033	0.93082	0.60755	0.7177	0.9258	0.75842	0.593	0.94765	0.71397	0.69767	0.96659	1.0747	0.695	0.67053	1.2646	0.70884
0.90213	0.72216	1.0185	0.65159	0.70151	1.0928	0.39187	0.64258	0.90543	0.61653	0.60337	0.84117	0.6394	0.65947	0.94997	0.80652	0.65414	1.0015	0.6839	0.58179	0.9521	0.51615	0.67982	0.99163	0.72725	0.69538	0.88775	0.71008	0.64934	0.86522	0.74214	0.77982	0.93665	0.72765	0.69758	1.0291	0.63418	0.77052	0.99011	0.78367	0.57805	1.1366	0.7169	0.69149	0.95175	1.0131	0.75614	0.67158	1.4171	0.66045
0.86035	0.74	0.92685	0.57441	0.74209	1.033	0.37304	0.65523	0.89171	0.6649	0.61343	0.80384	0.58396	0.6738	0.89196	0.78192	0.63756	0.95292	0.69623	0.62811	0.82196	0.55942	0.71253	0.9684	0.72816	0.71101	0.81068	0.70598	0.63752	0.8472	0.73472	0.76052	0.84194	0.72707	0.58937	0.92237	0.60275	0.72535	0.9198	0.77387	0.65299	0.97727	0.69466	0.70192	0.93821	1.0096	0.70489	0.69397	1.2941	0.68717
NaN	NaN	NaN	NaN	NaN	NaN	NaN	NaN	NaN	NaN	NaN	NaN	NaN	NaN	NaN	NaN	NaN	NaN	NaN	NaN	NaN	NaN	NaN	NaN	NaN	NaN	NaN	NaN	NaN	NaN	NaN	NaN	NaN	NaN	NaN	NaN	NaN	NaN	NaN	NaN	NaN	NaN	NaN	NaN	NaN	NaN	NaN	NaN	NaN	NaN
0.97789	0.73666	0.99007	0.68501	0.71534	NaN	0.3478	0.69253	NaN	0.71413	NaN	0.77821	0.69654	0.6814	0.80842	0.7128	NaN	0.85286	0.763	0.44326	0.68988	0.73619	0.81009	0.93722	0.65073	0.59011	0.78446	0.77063	0.59335	0.71955	0.76402	0.73182	0.80675	0.78426	0.55996	0.89437	0.59435	0.74413	0.81545	0.78022	0.56539	0.93482	0.84747	0.7202	0.86747	1.2041	0.62744	0.66353	1.2889	0.82982
0.79218	0.66628	NaN	0.57321	0.84229	NaN	0.40362	0.73816	NaN	0.65744	0.61496	NaN	0.66316	0.68359	0.96412	0.86614	0.66901	NaN	0.71004	0.62914	NaN	0.60621	0.78781	NaN	0.73846	0.79726	NaN	0.6449	0.62686	0.76981	0.85196	0.74618	0.76101	0.72747	0.73311	NaN	0.63174	0.62898	0.95096	0.79937	0.61889	NaN	0.72458	0.73039	1.0027	1.007	NaN	0.90957	1.1626	0.69829
NaN	0.69524	NaN	NaN	0.71111	NaN	NaN	0.56665	NaN	0.62412	NaN	NaN	NaN	NaN	NaN	NaN	NaN	NaN	0.68511	NaN	NaN	0.54383	0.70681	NaN	0.77097	NaN	NaN	0.67418	NaN	NaN	0.99178	NaN	NaN	NaN	NaN	NaN	NaN	NaN	NaN	0.67488	NaN	NaN	NaN	NaN	1.154	NaN	NaN	NaN	1.4533	NaN
NaN	1.0279	NaN	NaN	NaN	NaN	NaN	NaN	NaN	NaN	NaN	NaN	NaN	NaN	NaN	NaN	NaN	NaN	NaN	NaN	NaN	NaN	NaN	NaN	NaN	NaN	NaN	NaN	NaN	NaN	NaN	NaN	NaN	NaN	NaN	NaN	NaN	NaN	NaN	NaN	NaN	NaN	NaN	NaN	NaN	NaN	NaN	NaN	NaN	NaN
0.98009	NaN	NaN	NaN	0.94443	NaN	0.39613	0.74472	NaN	0.86615	0.68293	NaN	NaN	NaN	NaN	NaN	NaN	1.0626	0.60545	NaN	NaN	NaN	1.0695	0.86508	NaN	NaN	1.0589	0.88463	NaN	0.8867	0.84636	NaN	NaN	0.59583	NaN	0.87565	NaN	NaN	1.2208	1.4672	NaN	1.2529	0.68878	NaN	0.98758	NaN	0.78611	NaN	1.4658	NaN
0.99599	0.86779	1.0158	0.71561	0.49049	1.3016	0.29696	0.54408	0.77818	1.5274	0.48986	0.91571	0.45848	1.0417	1.03	0.75457	0.78413	1.0514	0.49888	0.91005	0.97707	1.8753	0.51245	1.1603	0.4739	NaN	0.93991	0.65408	0.40157	0.95796	0.81871	0.65092	0.95122	0.96089	0.55269	1.0807	0.93311	NaN	1.004	0.6112	0.38036	1.1719	0.64905	0.44577	0.90212	0.68845	0.78497	NaN	1.4312	0.51868
1.0837	NaN	NaN	0.97448	NaN	NaN	NaN	NaN	NaN	1.4104	NaN	NaN	NaN	NaN	NaN	NaN	NaN	NaN	NaN	NaN	NaN	1.6228	NaN	NaN	0.94134	NaN	NaN	0.87726	NaN	NaN	NaN	NaN	NaN	NaN	NaN	1.2383	0.54618	0.70311	1.0844	NaN	NaN	1.1922	NaN	NaN	0.52465	NaN	1.0626	NaN	1.611	NaN
NaN	NaN	NaN	1.3737	NaN	NaN	NaN	NaN	NaN	NaN	NaN	NaN	NaN	NaN	NaN	NaN	NaN	NaN	NaN	NaN	NaN	4.2601	NaN	NaN	NaN	NaN	NaN	NaN	NaN	NaN	NaN	NaN	NaN	NaN	NaN	NaN	NaN	NaN	NaN	NaN	NaN	NaN	NaN	NaN	NaN	NaN	NaN	NaN	NaN	NaN
0.89623	0.64915	1.0537	0.6304	0.43312	1.3145	0.2637	0.39213	0.64613	1.233	0.35802	0.88883	0.4355	0.37099	0.84829	0.72474	0.35671	0.94692	0.48776	0.57065	1.0237	1.3977	0.30658	0.99263	0.49658	0.4443	0.8668	0.58867	0.32437	0.78819	0.74077	0.56967	0.88757	0.77081	0.29088	0.9267	0.81435	0.50754	0.88695	0.63262	0.37097	1.1806	0.7244	0.40209	0.92373	0.61983	0.73747	0.43547	1.1688	0.40666
NaN	NaN	NaN	NaN	NaN	NaN	NaN	NaN	NaN	NaN	NaN	NaN	NaN	NaN	NaN	NaN	NaN	NaN	NaN	NaN	NaN	NaN	NaN	NaN	NaN	NaN	NaN	NaN	NaN	0.85965	NaN	NaN	NaN	NaN	NaN	NaN	NaN	NaN	NaN	NaN	NaN	NaN	NaN	NaN	NaN	NaN	NaN	NaN	NaN	NaN
0.87036	0.94043	0.8972	0.69473	0.41531	1.0564	0.36788	0.38187	0.85118	1.4438	0.36308	0.75341	0.53318	0.3393	0.91959	0.85666	0.34355	0.87412	0.56607	0.69885	0.83044	1.5242	0.49056	1.0348	0.5149	0.37563	0.73622	0.64316	0.35004	0.65981	0.67658	0.63139	0.83992	0.79093	0.4913	0.89965	0.69296	0.52774	0.86905	0.6352	0.44389	0.89564	0.61887	0.33516	0.84753	0.74424	0.72222	0.48009	1.1775	0.52218
NaN	0.68936	NaN	0.60775	0.57608	3.047	0.27622	0.48972	NaN	0.96028	NaN	NaN	0.5369	0.50079	NaN	NaN	0.52235	NaN	0.75694	0.56132	NaN	1.0341	NaN	NaN	0.67331	NaN	NaN	0.72371	NaN	NaN	NaN	0.64895	NaN	NaN	0.16881	NaN	NaN	0.58675	0.93674	0.64936	NaN	NaN	0.7064	0.19634	NaN	0.45714	NaN	0.1847	1.2188	NaN
NaN	1.1428	NaN	0.6097	NaN	NaN	NaN	NaN	NaN	1.6388	NaN	0.56821	NaN	0.6563	1.1271	NaN	NaN	1.1346	NaN	NaN	NaN	1.5206	NaN	1.2432	NaN	NaN	NaN	0.54162	NaN	0.8631	0.53745	NaN	0.99325	0.8133	NaN	1.1081	0.66223	NaN	0.79755	0.66856	NaN	NaN	0.56412	NaN	NaN	NaN	0.71753	NaN	1.2707	NaN
NaN	0.70646	NaN	NaN	NaN	0.91079	NaN	NaN	NaN	NaN	NaN	NaN	NaN	NaN	0.78125	NaN	NaN	0.88179	NaN	NaN	NaN	NaN	NaN	1.0054	NaN	NaN	NaN	NaN	NaN	NaN	NaN	0.36849	NaN	NaN	0.41437	NaN	NaN	NaN	NaN	NaN	NaN	NaN	NaN	0.67855	NaN	NaN	0.67828	NaN	NaN	NaN
1.0303	NaN	1.1219	1.0284	NaN	NaN	0.62982	NaN	1.0991	1.3472	NaN	0.71956	NaN	NaN	0.89542	NaN	NaN	NaN	NaN	NaN	NaN	0.71866	NaN	0.94586	0.79712	NaN	1.4204	0.82926	NaN	0.96833	NaN	NaN	1.0512	NaN	NaN	NaN	0.65728	NaN	NaN	0.72876	NaN	NaN	0.62675	NaN	1.1926	NaN	NaN	NaN	1.3159	NaN
NaN	NaN	1.0143	0.8419	0.67973	NaN	NaN	NaN	NaN	NaN	0.69501	0.96716	NaN	NaN	NaN	NaN	NaN	NaN	NaN	NaN	NaN	NaN	0.50011	NaN	NaN	0.6065	NaN	NaN	0.44453	0.78399	0.62875	NaN	NaN	0.82896	NaN	NaN	0.75665	0.69155	NaN	NaN	NaN	NaN	NaN	NaN	NaN	NaN	NaN	0.46723	NaN	NaN
NaN	0.95793	1.1476	0.77783	0.97017	1.4891	NaN	0.94684	0.8456	NaN	0.71388	1.1964	0.81701	NaN	1.2968	NaN	NaN	1.1913	NaN	0.48161	1.0412	NaN	NaN	1.154	NaN	0.82584	0.97727	1.0742	0.89891	1.0731	1.192	0.88798	1.2498	NaN	0.83065	1.1641	NaN	NaN	1.0497	NaN	0.77534	1.2197	NaN	0.86483	1.1888	1.3251	0.85463	0.70512	1.6342	NaN
1.1544	0.7306	NaN	0.82013	0.69566	0.94319	0.70367	0.58673	NaN	0.85586	0.61321	NaN	0.80477	0.58676	NaN	1.1108	0.58945	0.91669	1.1237	0.57225	NaN	1.157	0.7625	NaN	0.92639	0.63258	0.80902	0.89136	0.5513	NaN	0.8735	0.79341	NaN	NaN	0.6845	NaN	0.64677	0.70451	1.1831	1.0185	0.60693	NaN	0.85941	1.0179	0.98296	0.9228	0.61313	NaN	1.2378	0.74007
NaN	NaN	NaN	NaN	NaN	NaN	NaN	NaN	NaN	NaN	NaN	NaN	NaN	NaN	NaN	1.1707	0.48778	NaN	NaN	0.49309	NaN	NaN	0.50995	NaN	NaN	0.59455	NaN	NaN	NaN	NaN	1.2229	0.60676	NaN	NaN	0.39331	NaN	0.77032	NaN	NaN	NaN	NaN	NaN	NaN	NaN	NaN	NaN	NaN	0.42086	NaN	0.47407
NaN	NaN	NaN	NaN	NaN	NaN	NaN	NaN	NaN	NaN	NaN	NaN	NaN	NaN	NaN	NaN	NaN	NaN	NaN	NaN	NaN	NaN	NaN	NaN	NaN	NaN	NaN	NaN	NaN	NaN	NaN	NaN	NaN	NaN	NaN	NaN	NaN	NaN	NaN	NaN	NaN	NaN	NaN	NaN	NaN	NaN	NaN	NaN	NaN	NaN
0.85701	0.83765	NaN	0.49562	0.52256	1.5878	NaN	0.79985	NaN	0.80513	0.54859	NaN	0.52837	0.78486	NaN	0.81078	0.76381	NaN	0.74655	0.84513	1.1643	NaN	0.78282	NaN	0.71002	0.8152	NaN	0.58594	0.6043	NaN	0.84296	1.0728	NaN	0.77952	0.82866	NaN	0.61935	1.2248	NaN	0.72851	0.37579	NaN	0.698	0.60525	NaN	1.0207	NaN	0.81751	NaN	0.53994
NaN	NaN	NaN	NaN	NaN	NaN	NaN	NaN	NaN	NaN	NaN	NaN	NaN	NaN	NaN	NaN	NaN	NaN	NaN	NaN	NaN	NaN	NaN	NaN	NaN	NaN	NaN	NaN	NaN	NaN	NaN	NaN	NaN	NaN	NaN	NaN	NaN	NaN	NaN	NaN	NaN	NaN	NaN	NaN	NaN	NaN	NaN	NaN	NaN	NaN
0.7944	NaN	NaN	0.56534	NaN	NaN	NaN	NaN	0.86698	0.71844	NaN	NaN	NaN	NaN	NaN	0.95429	NaN	NaN	NaN	NaN	NaN	NaN	NaN	NaN	0.6366	NaN	NaN	NaN	NaN	0.62782	0.65278	NaN	NaN	0.85684	NaN	NaN	NaN	NaN	NaN	0.68433	NaN	NaN	0.70345	NaN	1.0202	NaN	NaN	NaN	NaN	NaN
NaN	NaN	NaN	NaN	NaN	NaN	NaN	NaN	NaN	NaN	NaN	NaN	NaN	NaN	NaN	NaN	NaN	NaN	NaN	NaN	NaN	NaN	NaN	NaN	NaN	NaN	NaN	NaN	NaN	NaN	NaN	NaN	NaN	NaN	NaN	NaN	NaN	NaN	NaN	NaN	NaN	NaN	NaN	NaN	NaN	NaN	NaN	NaN	NaN	NaN
0.82686	0.70611	0.91603	0.61007	0.68267	1.0114	0.33781	0.72093	1.0125	0.7331	0.63703	0.71853	0.58161	0.61778	0.9228	0.8102	0.54376	0.92932	0.70785	0.57935	0.78898	0.53974	0.67621	0.88497	0.65754	0.74361	0.79465	0.67816	0.55175	0.82243	0.82348	0.7514	0.8896	0.74174	0.59597	0.97089	0.57898	0.63561	0.87036	0.74956	0.44906	0.88041	0.71468	0.73938	0.93701	1.0269	0.75423	0.61944	1.3224	0.63662
NaN	NaN	NaN	NaN	NaN	NaN	NaN	NaN	NaN	NaN	NaN	NaN	NaN	NaN	NaN	NaN	NaN	NaN	NaN	NaN	NaN	NaN	NaN	NaN	NaN	NaN	NaN	NaN	NaN	NaN	NaN	NaN	NaN	NaN	NaN	NaN	NaN	NaN	NaN	NaN	NaN	NaN	NaN	NaN	NaN	NaN	NaN	NaN	NaN	NaN
NaN	NaN	NaN	NaN	NaN	NaN	NaN	NaN	NaN	NaN	NaN	NaN	NaN	0.83631	NaN	NaN	NaN	NaN	NaN	NaN	NaN	NaN	NaN	NaN	NaN	NaN	NaN	NaN	0.70766	NaN	NaN	NaN	NaN	NaN	NaN	NaN	0.48704	NaN	NaN	NaN	NaN	NaN	NaN	NaN	NaN	1.0409	NaN	NaN	NaN	NaN
0.96878	0.6509	0.85354	0.76704	0.41253	0.8876	0.524	0.3537	1.1593	1.494	0.40262	0.68464	0.74775	0.50113	0.73473	0.83681	0.44939	0.91932	0.56092	0.54017	0.82596	1.7981	0.40405	0.75689	0.59095	0.34516	0.76934	0.62659	0.38342	0.63432	0.66309	0.48451	0.70336	1.1036	0.45319	0.73932	0.72585	0.49536	0.71985	0.67218	0.35146	0.74083	0.68122	0.42146	0.66265	0.62906	0.58009	0.38154	0.78223	0.46864
0.83717	NaN	NaN	NaN	NaN	NaN	NaN	NaN	NaN	NaN	NaN	NaN	NaN	NaN	NaN	NaN	NaN	NaN	NaN	NaN	NaN	NaN	NaN	NaN	0.73208	NaN	NaN	0.54125	NaN	NaN	NaN	NaN	NaN	0.51436	NaN	NaN	0.60105	NaN	NaN	NaN	NaN	NaN	NaN	NaN	NaN	NaN	NaN	NaN	NaN	NaN
NaN	NaN	NaN	NaN	NaN	NaN	NaN	NaN	NaN	0.66936	NaN	NaN	NaN	NaN	NaN	NaN	NaN	NaN	NaN	NaN	NaN	NaN	NaN	NaN	NaN	0.84202	NaN	NaN	NaN	NaN	0.91053	NaN	NaN	NaN	NaN	NaN	NaN	NaN	NaN	NaN	NaN	NaN	NaN	NaN	NaN	0.91199	NaN	0.80152	NaN	NaN
NaN	NaN	NaN	NaN	NaN	NaN	NaN	NaN	NaN	NaN	NaN	NaN	NaN	NaN	NaN	NaN	NaN	NaN	NaN	NaN	NaN	NaN	NaN	NaN	1.6347	NaN	NaN	NaN	NaN	NaN	NaN	NaN	NaN	NaN	NaN	NaN	NaN	NaN	NaN	NaN	NaN	NaN	NaN	NaN	NaN	NaN	NaN	NaN	NaN	NaN
0.8755	0.75329	0.96414	0.66771	0.83053	1.0751	0.40211	0.70646	0.9926	0.96098	0.60684	0.74255	0.6573	0.72561	0.858	0.90552	0.66974	1.0158	0.79104	0.80316	0.82576	0.95987	0.74665	1.0993	0.75629	0.71503	0.71269	0.69661	0.61694	0.7529	0.87189	0.74542	0.95766	0.77555	0.52447	0.9183	0.6783	0.80837	1.0961	0.84865	0.68915	0.9016	0.78955	0.7863	0.7966	1.0248	0.66196	0.67885	1.334	0.73735
NaN	NaN	NaN	NaN	NaN	NaN	NaN	NaN	NaN	NaN	NaN	NaN	NaN	NaN	NaN	NaN	NaN	NaN	NaN	NaN	NaN	NaN	NaN	NaN	NaN	NaN	NaN	NaN	NaN	NaN	NaN	NaN	NaN	NaN	NaN	NaN	NaN	NaN	NaN	NaN	NaN	NaN	NaN	NaN	NaN	NaN	NaN	NaN	NaN	NaN
0.89309	0.75784	NaN	0.67709	0.51482	1.0481	0.33153	NaN	0.73556	0.86977	0.57831	NaN	0.59134	NaN	NaN	0.8143	0.5201	2.0035	0.7458	0.49273	NaN	0.70643	0.60707	1.0086	0.72008	NaN	0.78102	0.68927	NaN	0.93278	0.85345	0.62454	NaN	0.78422	0.91074	NaN	0.63688	0.71431	1.02	0.77167	1.1593	1.0252	0.79324	0.98298	NaN	1.1542	NaN	0.54333	NaN	0.67698
NaN	NaN	NaN	NaN	NaN	NaN	NaN	NaN	NaN	0.97323	NaN	NaN	NaN	NaN	NaN	NaN	NaN	NaN	NaN	NaN	NaN	NaN	NaN	NaN	NaN	NaN	NaN	NaN	NaN	NaN	NaN	NaN	NaN	NaN	NaN	NaN	NaN	NaN	NaN	NaN	NaN	NaN	NaN	NaN	NaN	NaN	NaN	NaN	NaN	NaN
NaN	NaN	NaN	NaN	NaN	NaN	NaN	NaN	NaN	NaN	NaN	NaN	NaN	NaN	NaN	NaN	NaN	NaN	NaN	NaN	NaN	NaN	NaN	NaN	NaN	NaN	NaN	NaN	NaN	NaN	NaN	NaN	NaN	NaN	NaN	NaN	NaN	NaN	NaN	NaN	NaN	NaN	NaN	NaN	NaN	NaN	NaN	NaN	NaN	NaN
0.85908	0.67848	0.76937	0.59854	1.0442	0.79172	0.61149	0.75061	0.87829	1.2733	0.64014	0.61887	0.61292	1.2764	0.81663	0.9469	0.56327	0.81486	0.81035	0.80728	0.58081	1.0483	0.46312	1.7721	NaN	0.82244	0.77297	0.66591	NaN	0.99724	NaN	0.87037	0.94677	0.75257	NaN	1.0484	NaN	0.82236	1.1058	NaN	0.47198	1.0751	NaN	0.66486	0.5881	1.5069	0.91059	NaN	0.70819	0.61184
0.95271	0.79133	1.0212	0.76784	0.7835	1.1917	0.39142	0.65592	0.73716	0.8468	0.62929	0.8969	0.66757	0.71548	0.86193	0.7534	0.63101	0.86584	0.68049	0.58995	0.89828	0.59827	0.65748	0.94448	0.77077	0.72406	0.96889	0.73639	0.65295	0.78415	0.71728	0.7612	0.94433	0.75804	0.54688	0.81395	0.58845	0.68813	0.76031	0.77405	0.57015	0.97076	0.69967	0.59439	0.87438	0.95577	0.60684	0.66001	1.3119	0.72029
0.81583	0.69037	NaN	0.50093	0.82692	NaN	NaN	0.63716	NaN	NaN	NaN	NaN	0.68529	0.54574	NaN	NaN	NaN	NaN	NaN	NaN	NaN	0.566	NaN	NaN	0.76388	NaN	NaN	0.68504	0.57033	NaN	0.82565	NaN	NaN	NaN	NaN	NaN	0.52295	NaN	NaN	0.72358	NaN	NaN	0.69719	NaN	NaN	NaN	NaN	NaN	NaN	NaN
NaN	NaN	NaN	NaN	NaN	NaN	NaN	NaN	NaN	NaN	NaN	NaN	NaN	0.91966	NaN	NaN	NaN	NaN	NaN	NaN	NaN	NaN	NaN	NaN	NaN	NaN	NaN	NaN	NaN	NaN	NaN	NaN	NaN	NaN	NaN	NaN	NaN	NaN	NaN	NaN	NaN	NaN	NaN	NaN	NaN	1.4651	NaN	NaN	NaN	NaN
0.85949	0.77171	1.1779	0.61282	0.75593	1.197	0.38415	0.67468	0.84255	0.76236	0.71902	0.91635	0.6282	0.66901	1.0245	0.88641	0.64185	0.93338	0.76044	0.61852	0.93596	0.72634	0.67203	1.0386	0.75476	0.69394	0.88716	0.67923	0.6427	0.84829	0.82463	0.72712	0.9897	0.74111	0.55383	0.96992	0.53471	0.79032	1.0215	0.82491	0.68244	0.96594	0.74466	0.65685	0.90095	0.88925	0.71335	0.7076	1.4758	0.68211
NaN	NaN	NaN	NaN	NaN	NaN	NaN	NaN	NaN	NaN	NaN	NaN	NaN	NaN	NaN	NaN	NaN	NaN	NaN	NaN	NaN	NaN	NaN	NaN	NaN	NaN	NaN	NaN	NaN	NaN	NaN	NaN	NaN	NaN	NaN	NaN	NaN	NaN	NaN	NaN	NaN	NaN	NaN	NaN	NaN	NaN	NaN	NaN	NaN	NaN
NaN	1.009	NaN	NaN	0.84636	NaN	NaN	NaN	0.77308	1.0301	0.80295	NaN	NaN	NaN	NaN	0.9684	0.91212	NaN	NaN	0.92244	1.377	NaN	0.9905	NaN	NaN	NaN	0.9263	NaN	0.54852	0.79059	1.2717	1.0866	0.7922	1.0047	NaN	NaN	NaN	1.0516	1.0547	NaN	NaN	NaN	NaN	1.1176	NaN	1.1652	0.62635	1.0819	NaN	0.95296
NaN	0.72693	1.0608	NaN	0.76664	NaN	NaN	0.58927	NaN	0.53463	NaN	NaN	NaN	0.60203	NaN	0.77257	0.55447	1.3202	NaN	0.46978	NaN	NaN	0.61671	NaN	0.69872	NaN	NaN	NaN	0.5638	1.0573	0.7581	0.70934	NaN	0.75136	0.60308	NaN	NaN	0.77295	1.0651	0.6898	NaN	1.2555	NaN	0.68634	NaN	0.99106	NaN	0.51728	1.5367	0.79406
NaN	NaN	NaN	NaN	NaN	NaN	NaN	NaN	NaN	NaN	NaN	NaN	NaN	NaN	NaN	NaN	NaN	NaN	NaN	NaN	NaN	NaN	NaN	NaN	NaN	NaN	NaN	NaN	NaN	NaN	NaN	NaN	NaN	NaN	NaN	NaN	NaN	NaN	NaN	NaN	NaN	NaN	NaN	NaN	NaN	NaN	NaN	NaN	NaN	NaN
NaN	NaN	NaN	NaN	NaN	NaN	NaN	0.95893	NaN	NaN	NaN	NaN	NaN	NaN	NaN	NaN	NaN	NaN	NaN	NaN	NaN	NaN	NaN	NaN	NaN	NaN	NaN	NaN	NaN	0.2258	NaN	NaN	0.77426	NaN	NaN	NaN	0.37154	NaN	0.42513	NaN	NaN	NaN	NaN	NaN	NaN	NaN	NaN	NaN	NaN	NaN
NaN	NaN	NaN	NaN	NaN	NaN	NaN	NaN	NaN	NaN	NaN	NaN	NaN	NaN	NaN	NaN	NaN	NaN	NaN	NaN	NaN	NaN	NaN	NaN	NaN	NaN	NaN	NaN	NaN	NaN	NaN	NaN	NaN	NaN	NaN	NaN	NaN	NaN	NaN	NaN	NaN	NaN	NaN	NaN	NaN	NaN	NaN	NaN	NaN	NaN
0.82414	0.72923	NaN	0.60121	0.90055	NaN	NaN	NaN	NaN	NaN	0.71493	NaN	0.56422	0.64429	NaN	0.71658	0.56145	NaN	0.7546	0.79376	NaN	0.57243	0.70455	NaN	0.58365	0.85718	NaN	NaN	0.6033	NaN	0.52678	0.78	NaN	NaN	NaN	NaN	0.69877	0.98706	NaN	0.81825	NaN	NaN	0.7981	NaN	NaN	NaN	NaN	0.97458	NaN	NaN
0.62183	0.82474	NaN	NaN	0.81651	NaN	0.46887	0.78785	NaN	NaN	0.99758	NaN	NaN	0.85312	NaN	NaN	1.37	NaN	0.87381	0.86283	NaN	NaN	0.85571	NaN	NaN	0.91176	NaN	0.76358	NaN	NaN	NaN	1.0889	NaN	0.7603	NaN	NaN	0.72153	0.82191	NaN	0.76587	NaN	NaN	NaN	NaN	NaN	NaN	NaN	NaN	NaN	NaN
0.90302	0.865	0.98639	0.56162	0.82833	1.2573	0.39463	0.79035	0.76569	0.70209	0.71302	0.882	0.60835	0.89703	0.92255	0.78954	0.64342	0.86494	0.7241	0.7336	0.92441	0.49485	0.77007	1.0267	0.74631	0.85316	0.85153	0.71227	0.84298	0.92084	0.80927	0.90685	0.95126	0.78809	0.61297	1.0928	0.60109	0.82901	0.93578	0.78988	0.64294	1.0548	0.78867	0.81851	0.9213	1.1489	0.72224	0.72047	1.4457	0.83354
0.64094	0.67216	1.1613	NaN	0.60966	0.98453	0.32187	0.54713	1.0219	NaN	0.6486	0.86538	NaN	NaN	1.4279	NaN	0.58565	0.86936	NaN	0.46352	0.8762	NaN	NaN	1.0747	NaN	NaN	NaN	0.56665	0.65754	0.43385	0.75578	NaN	1.036	0.6591	0.5127	1.2233	NaN	NaN	1.1367	0.84247	NaN	0.96142	0.52675	0.55036	0.91566	NaN	0.50394	NaN	NaN	NaN
0.92361	0.66024	NaN	0.56374	0.71422	NaN	0.358	0.62938	NaN	0.66565	0.62888	NaN	0.53332	0.62664	NaN	0.71016	0.65095	NaN	0.65147	0.63762	NaN	NaN	0.76743	NaN	0.72819	0.68289	NaN	0.72768	NaN	NaN	NaN	0.91018	NaN	NaN	0.71684	NaN	NaN	0.73984	NaN	0.73813	0.6743	NaN	NaN	0.64816	NaN	0.87928	NaN	0.68536	NaN	0.73379
NaN	NaN	NaN	NaN	NaN	NaN	NaN	NaN	NaN	NaN	NaN	NaN	NaN	NaN	NaN	NaN	NaN	NaN	NaN	NaN	NaN	NaN	NaN	NaN	NaN	NaN	NaN	NaN	NaN	NaN	NaN	NaN	NaN	NaN	NaN	NaN	NaN	NaN	NaN	NaN	NaN	NaN	NaN	NaN	NaN	NaN	NaN	NaN	NaN	NaN
0.87659	0.7895	1.0341	0.67975	0.78088	1.1221	0.42098	0.65253	0.93275	0.68535	0.69429	0.84924	0.66225	0.71741	1.0064	0.92879	0.68162	0.87646	0.79259	0.67718	0.85791	0.64047	0.75894	0.98827	0.82209	0.79441	0.82337	0.77381	0.69762	0.7823	0.8729	0.8621	0.86214	0.83086	0.75113	1.0034	0.69661	0.82776	0.96402	0.87297	0.78034	0.92705	0.82855	0.87025	0.9423	1.3225	0.70718	0.91332	1.4326	0.91482
1.3476	0.85519	NaN	1.0091	0.93609	NaN	1.1874	0.86793	NaN	NaN	NaN	NaN	0.80639	0.66742	NaN	0.92775	NaN	NaN	NaN	NaN	NaN	NaN	0.72316	NaN	0.529	0.71552	NaN	NaN	NaN	NaN	1.0847	0.75968	NaN	NaN	NaN	NaN	1.2842	0.93253	NaN	0.5711	0.58578	NaN	0.76314	0.72032	NaN	1.0278	NaN	NaN	NaN	0.724
NaN	NaN	NaN	NaN	NaN	NaN	NaN	NaN	NaN	NaN	NaN	NaN	NaN	NaN	NaN	NaN	NaN	NaN	NaN	NaN	NaN	NaN	NaN	NaN	NaN	NaN	NaN	NaN	NaN	NaN	NaN	NaN	NaN	NaN	NaN	NaN	NaN	NaN	NaN	NaN	NaN	NaN	NaN	NaN	NaN	NaN	NaN	NaN	NaN	NaN
0.9004	0.75127	0.99977	0.66921	0.85308	1.0316	0.4096	0.66393	1.0497	1.0003	0.59826	0.92489	0.79417	0.69895	0.9694	0.80764	0.59494	NaN	0.82093	0.56964	0.81381	0.85045	0.64638	NaN	0.81269	0.6849	0.9469	0.82083	0.56758	0.84486	0.86013	0.84812	0.79976	0.94247	0.54728	NaN	0.63192	0.75105	0.93763	0.91574	0.58718	NaN	0.73903	0.61382	NaN	1.0037	0.67165	0.60188	1.1985	0.56318
0.99886	0.75009	0.76368	0.96474	NaN	NaN	0.39853	0.54576	NaN	1.2336	0.64175	0.70265	0.80839	0.52905	NaN	1.0156	0.46485	0.92401	0.79191	NaN	0.92298	1.0261	0.57947	NaN	0.76858	0.55496	NaN	0.91416	0.5826	0.67487	0.8008	0.63971	NaN	1.0535	0.56998	1.0833	0.71849	0.63042	0.91717	0.72557	0.53984	0.91456	0.66832	0.51546	NaN	0.98341	NaN	0.60379	NaN	0.66679
0.92554	0.63014	1.1134	0.61244	0.81251	1.0075	0.42588	0.51629	0.82015	0.95546	0.47882	0.7539	0.5185	0.54296	0.84023	0.79767	0.52512	0.88929	0.56111	0.48031	0.83083	0.57452	0.5729	0.89784	0.72998	0.63874	0.74714	0.71821	0.51119	0.82115	0.83566	0.73252	0.76414	0.83736	0.71325	0.81809	0.50733	0.6186	0.85325	0.76425	0.51	0.85654	0.75479	0.58834	0.90173	0.9226	0.86533	0.69301	1.2265	0.62603
NaN	NaN	NaN	NaN	NaN	NaN	NaN	NaN	NaN	NaN	NaN	NaN	NaN	NaN	NaN	NaN	NaN	NaN	NaN	NaN	NaN	NaN	NaN	NaN	NaN	NaN	NaN	NaN	NaN	NaN	NaN	NaN	NaN	NaN	NaN	NaN	NaN	NaN	NaN	NaN	NaN	NaN	NaN	NaN	NaN	NaN	NaN	NaN	NaN	NaN
0.93091	0.7283	0.97296	0.53327	0.67736	0.98477	0.297	0.59358	0.81471	0.78032	0.68464	0.79125	0.64224	0.68223	0.72922	0.71093	0.65486	0.86811	0.78162	0.63253	0.74547	0.74302	0.67108	0.81603	0.75015	0.77588	0.72484	0.75202	0.63765	0.77186	0.69604	0.76885	0.83988	0.69262	0.6422	0.89374	0.66167	0.67049	0.75051	0.65888	0.66433	0.81271	0.56693	0.6397	0.54318	0.70687	0.36643	0.52952	0.50822	0.51573
NaN	NaN	NaN	NaN	NaN	NaN	NaN	NaN	NaN	NaN	NaN	NaN	NaN	NaN	NaN	NaN	NaN	NaN	NaN	NaN	NaN	NaN	NaN	NaN	NaN	NaN	NaN	NaN	NaN	NaN	NaN	NaN	NaN	NaN	NaN	NaN	NaN	NaN	NaN	NaN	NaN	NaN	NaN	NaN	NaN	NaN	NaN	NaN	NaN	NaN
NaN	NaN	NaN	NaN	NaN	NaN	NaN	NaN	NaN	NaN	NaN	NaN	NaN	NaN	NaN	NaN	NaN	NaN	NaN	NaN	NaN	NaN	NaN	NaN	NaN	NaN	NaN	NaN	NaN	NaN	NaN	NaN	NaN	NaN	NaN	NaN	NaN	NaN	NaN	NaN	NaN	NaN	NaN	NaN	NaN	NaN	NaN	NaN	NaN	NaN
0.90943	0.79451	1.205	0.74621	NaN	NaN	NaN	NaN	NaN	1.1948	NaN	NaN	NaN	NaN	0.97152	0.9953	NaN	1.0773	NaN	0.79549	NaN	NaN	NaN	1.0182	NaN	NaN	0.84723	NaN	0.60864	0.79808	0.78377	0.82505	0.77398	NaN	0.63807	1.0966	NaN	0.71961	0.86995	NaN	NaN	0.75405	0.63197	NaN	0.71822	NaN	0.69732	0.65332	1.3214	NaN
NaN	NaN	NaN	NaN	NaN	NaN	NaN	NaN	NaN	NaN	NaN	NaN	NaN	NaN	NaN	NaN	NaN	NaN	NaN	NaN	NaN	NaN	NaN	0.80774	NaN	NaN	NaN	NaN	NaN	NaN	NaN	NaN	NaN	NaN	NaN	NaN	NaN	NaN	NaN	NaN	NaN	NaN	NaN	NaN	NaN	NaN	NaN	NaN	NaN	NaN
NaN	NaN	NaN	NaN	NaN	NaN	NaN	NaN	NaN	NaN	NaN	NaN	NaN	NaN	NaN	NaN	NaN	NaN	NaN	NaN	NaN	NaN	NaN	NaN	NaN	NaN	NaN	NaN	NaN	NaN	NaN	NaN	NaN	NaN	NaN	NaN	NaN	NaN	NaN	NaN	NaN	NaN	NaN	NaN	NaN	NaN	NaN	NaN	NaN	NaN
NaN	NaN	NaN	NaN	NaN	NaN	NaN	NaN	NaN	NaN	NaN	NaN	NaN	NaN	NaN	NaN	NaN	NaN	NaN	NaN	NaN	NaN	NaN	NaN	NaN	NaN	NaN	NaN	NaN	NaN	NaN	NaN	NaN	NaN	NaN	NaN	NaN	NaN	NaN	NaN	NaN	NaN	NaN	NaN	NaN	NaN	NaN	NaN	NaN	NaN
NaN	NaN	NaN	NaN	NaN	NaN	NaN	NaN	NaN	NaN	NaN	NaN	NaN	NaN	NaN	NaN	NaN	NaN	NaN	NaN	NaN	NaN	NaN	NaN	NaN	NaN	NaN	NaN	NaN	NaN	NaN	NaN	NaN	NaN	NaN	NaN	NaN	NaN	NaN	NaN	NaN	NaN	NaN	NaN	NaN	NaN	NaN	NaN	NaN	NaN
NaN	NaN	NaN	NaN	NaN	NaN	NaN	NaN	NaN	NaN	NaN	NaN	NaN	NaN	NaN	NaN	NaN	NaN	NaN	NaN	NaN	NaN	NaN	NaN	NaN	NaN	NaN	NaN	NaN	NaN	NaN	NaN	NaN	NaN	NaN	1.121	NaN	NaN	NaN	NaN	NaN	NaN	NaN	NaN	NaN	NaN	NaN	NaN	NaN	NaN
NaN	NaN	NaN	NaN	NaN	NaN	NaN	NaN	NaN	NaN	NaN	NaN	NaN	NaN	NaN	NaN	NaN	NaN	NaN	NaN	NaN	NaN	NaN	NaN	NaN	NaN	NaN	NaN	NaN	NaN	NaN	NaN	NaN	NaN	NaN	NaN	NaN	NaN	NaN	NaN	NaN	NaN	NaN	NaN	NaN	NaN	NaN	NaN	NaN	NaN
NaN	NaN	NaN	NaN	NaN	NaN	NaN	NaN	NaN	NaN	NaN	NaN	NaN	NaN	NaN	NaN	NaN	NaN	NaN	NaN	NaN	NaN	NaN	NaN	NaN	NaN	NaN	NaN	NaN	NaN	NaN	NaN	NaN	NaN	NaN	NaN	NaN	NaN	NaN	NaN	NaN	NaN	NaN	NaN	NaN	NaN	NaN	NaN	NaN	NaN
NaN	NaN	NaN	NaN	NaN	NaN	NaN	NaN	NaN	NaN	NaN	NaN	NaN	NaN	NaN	0.83182	NaN	NaN	NaN	NaN	NaN	NaN	NaN	NaN	NaN	NaN	NaN	NaN	NaN	NaN	NaN	NaN	NaN	0.82078	NaN	NaN	NaN	NaN	NaN	NaN	NaN	NaN	NaN	NaN	NaN	NaN	NaN	NaN	NaN	NaN
0.84121	0.76095	0.9639	0.65967	0.64465	1.0605	0.32485	0.59464	0.95319	0.57963	0.56392	0.8073	0.62303	0.60476	0.70911	0.88013	0.55699	0.70236	0.6064	0.52083	0.8232	0.58874	0.63332	0.81134	0.64328	0.61665	0.88551	0.73007	0.59897	0.7408	0.73369	0.68277	0.69145	0.64348	0.73817	1.1008	0.59053	0.77627	0.88742	0.78218	0.74261	0.89674	0.69426	0.91347	0.79561	1.1957	0.56194	0.91019	0.87844	0.95974
0.98608	0.66188	1.0418	0.63751	0.69524	NaN	0.39568	0.63593	0.9626	0.77266	0.62708	0.56464	0.53392	0.65238	1.0099	0.75179	0.56358	1.0517	0.73232	0.49011	0.93138	0.54953	0.78002	0.93177	0.79459	0.69033	0.43529	NaN	0.57105	0.9141	0.90978	0.83346	0.64446	NaN	0.6288	NaN	NaN	0.66217	NaN	0.67769	0.67121	0.97118	0.56673	0.69064	NaN	0.97	0.6282	0.76688	1.6466	0.70217
NaN	NaN	NaN	NaN	NaN	NaN	NaN	NaN	NaN	NaN	NaN	NaN	NaN	NaN	NaN	NaN	NaN	NaN	NaN	NaN	NaN	NaN	NaN	NaN	NaN	NaN	NaN	NaN	NaN	NaN	NaN	NaN	NaN	NaN	NaN	NaN	NaN	NaN	NaN	NaN	NaN	NaN	NaN	NaN	NaN	NaN	NaN	NaN	NaN	NaN
NaN	NaN	NaN	NaN	NaN	NaN	NaN	NaN	NaN	NaN	NaN	NaN	2.5283	NaN	NaN	NaN	NaN	NaN	NaN	NaN	NaN	NaN	NaN	NaN	NaN	NaN	NaN	NaN	NaN	NaN	NaN	NaN	NaN	NaN	NaN	NaN	NaN	NaN	NaN	NaN	NaN	NaN	NaN	NaN	NaN	NaN	NaN	NaN	NaN	NaN
NaN	NaN	NaN	NaN	0.71362	NaN	NaN	0.72733	NaN	NaN	NaN	NaN	NaN	NaN	NaN	NaN	NaN	NaN	NaN	NaN	NaN	NaN	0.87092	NaN	NaN	0.85344	NaN	NaN	NaN	NaN	NaN	NaN	NaN	NaN	NaN	NaN	NaN	NaN	NaN	NaN	NaN	NaN	NaN	NaN	NaN	NaN	NaN	NaN	NaN	NaN
NaN	0.78936	NaN	NaN	0.64284	NaN	NaN	0.94954	NaN	NaN	NaN	NaN	NaN	NaN	NaN	NaN	NaN	NaN	NaN	NaN	NaN	NaN	NaN	NaN	NaN	0.46124	NaN	1.1488	0.77685	NaN	NaN	0.86553	NaN	NaN	NaN	NaN	0.78094	NaN	NaN	NaN	NaN	NaN	NaN	NaN	NaN	NaN	NaN	NaN	NaN	NaN
0.88068	NaN	NaN	0.57745	NaN	NaN	NaN	NaN	NaN	0.76785	NaN	NaN	0.57094	NaN	NaN	0.72966	NaN	NaN	0.54392	NaN	NaN	0.48805	NaN	NaN	0.75252	NaN	NaN	0.64634	NaN	NaN	0.7562	NaN	NaN	0.68446	NaN	NaN	0.6643	NaN	NaN	0.6167	NaN	NaN	0.52047	NaN	NaN	NaN	NaN	NaN	NaN	NaN
NaN	NaN	NaN	NaN	NaN	NaN	NaN	NaN	NaN	NaN	NaN	NaN	NaN	NaN	NaN	NaN	NaN	NaN	NaN	NaN	NaN	NaN	NaN	NaN	NaN	NaN	NaN	NaN	NaN	NaN	NaN	NaN	NaN	NaN	NaN	NaN	NaN	NaN	NaN	NaN	NaN	NaN	NaN	NaN	NaN	NaN	NaN	NaN	NaN	NaN
0.81846	NaN	NaN	0.65388	NaN	NaN	0.35831	0.69725	0.80425	0.60822	NaN	0.946	0.59091	NaN	0.88775	NaN	NaN	1.0966	0.72963	NaN	NaN	0.51731	0.58463	1.1725	0.64461	NaN	1	0.76537	0.51701	0.95672	0.69888	NaN	NaN	0.73862	NaN	0.9873	0.69233	NaN	1.1193	0.86488	NaN	1.2085	0.71848	NaN	1.0647	0.96826	0.90875	NaN	1.2737	0.49513
0.98376	0.67969	0.97891	0.66326	0.54883	1.1849	NaN	0.56003	0.73612	1.139	0.53078	0.87642	NaN	0.52679	1.1274	0.85517	0.5616	0.94527	0.65832	0.73728	0.80222	0.8771	0.59539	0.98844	0.55755	0.59719	1.0121	NaN	0.55771	0.73493	0.72145	0.64637	0.91826	0.67328	0.52596	0.941	NaN	0.58985	0.93119	NaN	0.59885	1.0264	NaN	0.53275	0.77438	0.79645	0.72356	0.72814	1.3338	0.49781
0.87205	0.8166	1.0328	0.75675	0.90803	1.025	0.49683	0.80686	0.77731	1.0689	0.76082	0.59077	0.7273	0.91458	0.88399	1.11	0.91069	0.87335	0.9807	0.86777	0.7946	0.77444	0.99112	0.9281	0.98828	NaN	0.71359	0.93205	0.82709	0.66679	1.0157	0.98911	0.85973	1.0078	0.93214	0.84606	0.7562	1.0723	0.81482	0.99831	1.2456	0.87008	0.97402	1.294	0.89262	0.9743	0.7398	0.90458	1.0937	1.31
NaN	NaN	NaN	NaN	0.83507	NaN	NaN	NaN	NaN	NaN	0.87257	NaN	NaN	NaN	NaN	NaN	NaN	NaN	NaN	NaN	NaN	NaN	NaN	NaN	NaN	0.79845	NaN	NaN	0.77585	NaN	NaN	NaN	NaN	NaN	NaN	NaN	NaN	NaN	NaN	NaN	NaN	NaN	NaN	NaN	NaN	1.011	NaN	NaN	NaN	NaN
0.90061	0.75944	NaN	NaN	NaN	NaN	0.47069	NaN	NaN	0.85767	0.61651	NaN	NaN	NaN	NaN	0.87324	NaN	NaN	NaN	0.96728	NaN	0.68368	0.77119	NaN	0.75717	0.47622	NaN	0.89111	NaN	NaN	NaN	0.72757	NaN	0.90042	NaN	NaN	NaN	NaN	NaN	NaN	0.69524	NaN	0.80873	NaN	NaN	NaN	NaN	NaN	NaN	NaN
0.93694	NaN	NaN	NaN	0.65572	NaN	NaN	NaN	NaN	0.89041	0.7469	0.92968	1.0561	0.69764	NaN	1.0454	NaN	NaN	0.77102	0.50607	NaN	0.862	0.84206	NaN	0.86191	0.86965	NaN	0.93009	0.6333	NaN	1.0538	NaN	NaN	0.9312	0.62678	NaN	NaN	0.70645	NaN	0.76356	0.63361	NaN	0.90621	1.2845	NaN	1.4933	NaN	0.91803	NaN	0.60058
NaN	NaN	NaN	NaN	NaN	NaN	NaN	NaN	NaN	NaN	NaN	NaN	NaN	NaN	NaN	NaN	NaN	NaN	NaN	NaN	NaN	NaN	NaN	NaN	NaN	NaN	NaN	NaN	NaN	NaN	NaN	NaN	NaN	NaN	NaN	NaN	NaN	NaN	NaN	NaN	NaN	NaN	NaN	NaN	NaN	NaN	NaN	NaN	NaN	NaN
0.8238	NaN	NaN	NaN	NaN	NaN	NaN	NaN	NaN	NaN	NaN	NaN	NaN	NaN	NaN	NaN	NaN	NaN	NaN	NaN	NaN	NaN	NaN	NaN	NaN	NaN	NaN	NaN	NaN	NaN	NaN	0.46834	NaN	NaN	0.4787	NaN	NaN	NaN	NaN	NaN	NaN	NaN	NaN	0.68579	NaN	NaN	NaN	NaN	NaN	NaN
0.87719	0.77138	0.86975	0.62503	0.69592	1.0722	0.36818	0.62875	0.86089	0.88453	0.61542	0.77375	0.62987	0.6358	0.94984	0.88213	0.63661	0.95291	0.73735	0.60142	0.83748	0.72001	0.67269	1.0159	0.71278	0.70902	0.8288	0.7128	0.5633	0.75148	0.70525	0.72404	1.0061	0.78661	0.63557	1.0693	0.58891	0.66475	0.95235	0.69895	0.62052	1.0011	0.66772	0.69235	0.94603	0.96273	0.73413	0.70247	1.278	0.69969
NaN	NaN	NaN	NaN	NaN	NaN	NaN	NaN	NaN	NaN	NaN	NaN	NaN	NaN	NaN	NaN	NaN	NaN	NaN	NaN	NaN	NaN	NaN	NaN	NaN	NaN	NaN	NaN	NaN	NaN	NaN	NaN	NaN	NaN	NaN	NaN	NaN	NaN	NaN	NaN	NaN	NaN	NaN	NaN	NaN	NaN	NaN	NaN	NaN	NaN
NaN	NaN	NaN	NaN	NaN	NaN	NaN	NaN	NaN	NaN	NaN	NaN	NaN	NaN	NaN	NaN	NaN	NaN	NaN	NaN	NaN	NaN	NaN	NaN	NaN	0.68179	NaN	NaN	NaN	NaN	NaN	NaN	NaN	NaN	NaN	NaN	NaN	NaN	NaN	NaN	NaN	NaN	NaN	NaN	NaN	NaN	NaN	NaN	NaN	0.65061
NaN	0.78811	NaN	NaN	NaN	NaN	NaN	NaN	NaN	NaN	NaN	NaN	NaN	NaN	NaN	NaN	NaN	NaN	NaN	NaN	NaN	NaN	NaN	NaN	NaN	NaN	NaN	NaN	NaN	NaN	NaN	NaN	NaN	NaN	NaN	NaN	NaN	NaN	NaN	NaN	NaN	NaN	NaN	NaN	NaN	NaN	NaN	NaN	NaN	NaN
0.85512	0.78611	NaN	0.68034	0.76449	NaN	0.32753	0.62123	0.95967	0.65409	0.58733	0.70456	0.6974	0.64724	NaN	0.89688	0.73425	0.88894	0.68856	0.70191	NaN	0.57497	0.67864	0.96813	0.76047	0.82674	NaN	0.71645	0.58001	0.71053	0.69656	0.85104	0.91634	0.76321	0.63257	0.91683	0.61207	0.72147	NaN	0.70413	0.47513	0.94216	0.61447	0.71607	0.85765	1.0996	0.5982	0.61884	1.005	0.73997
NaN	NaN	NaN	0.63003	NaN	NaN	0.35179	NaN	NaN	0.61369	NaN	NaN	0.73749	NaN	NaN	NaN	NaN	NaN	0.80994	NaN	NaN	NaN	NaN	NaN	NaN	NaN	NaN	NaN	NaN	NaN	NaN	NaN	NaN	0.75214	NaN	NaN	NaN	NaN	NaN	0.84706	NaN	NaN	0.78355	NaN	NaN	NaN	NaN	NaN	NaN	NaN
NaN	NaN	NaN	NaN	NaN	NaN	NaN	NaN	NaN	NaN	NaN	NaN	NaN	NaN	NaN	NaN	NaN	NaN	NaN	NaN	NaN	NaN	NaN	NaN	NaN	NaN	NaN	NaN	NaN	NaN	NaN	NaN	NaN	NaN	NaN	NaN	NaN	NaN	NaN	NaN	NaN	NaN	NaN	NaN	NaN	NaN	NaN	NaN	NaN	NaN
NaN	NaN	NaN	NaN	NaN	NaN	NaN	NaN	NaN	NaN	NaN	NaN	NaN	NaN	NaN	NaN	NaN	NaN	NaN	NaN	NaN	NaN	NaN	NaN	NaN	NaN	NaN	NaN	NaN	NaN	NaN	NaN	NaN	NaN	NaN	NaN	NaN	NaN	NaN	NaN	NaN	NaN	NaN	NaN	NaN	NaN	NaN	NaN	NaN	NaN
NaN	0.77372	NaN	NaN	NaN	NaN	NaN	NaN	0.43007	NaN	NaN	NaN	NaN	NaN	NaN	NaN	NaN	NaN	NaN	NaN	NaN	NaN	NaN	NaN	NaN	NaN	NaN	NaN	NaN	NaN	NaN	NaN	NaN	NaN	NaN	NaN	NaN	NaN	NaN	NaN	0.62408	NaN	NaN	0.62453	NaN	0.99773	NaN	0.54152	NaN	0.53789
NaN	NaN	NaN	NaN	NaN	NaN	NaN	NaN	NaN	NaN	NaN	NaN	NaN	NaN	NaN	NaN	NaN	NaN	NaN	NaN	NaN	NaN	NaN	NaN	NaN	NaN	NaN	NaN	NaN	NaN	NaN	NaN	NaN	NaN	NaN	NaN	NaN	NaN	NaN	NaN	NaN	NaN	NaN	NaN	NaN	NaN	NaN	NaN	NaN	NaN
NaN	NaN	NaN	0.48205	NaN	NaN	0.29828	NaN	NaN	NaN	NaN	NaN	NaN	NaN	NaN	NaN	0.64096	NaN	0.55486	NaN	NaN	NaN	0.62764	0.87517	NaN	0.65272	NaN	0.62023	0.67398	NaN	NaN	0.678	NaN	NaN	0.56231	1.2286	0.53516	NaN	NaN	0.73377	NaN	NaN	0.67832	NaN	NaN	NaN	0.70592	NaN	1.1765	NaN
NaN	NaN	NaN	NaN	NaN	NaN	NaN	NaN	NaN	NaN	NaN	NaN	NaN	NaN	NaN	NaN	NaN	NaN	NaN	NaN	NaN	NaN	NaN	NaN	NaN	NaN	NaN	NaN	NaN	NaN	NaN	NaN	NaN	NaN	NaN	NaN	NaN	NaN	NaN	0.9289	NaN	NaN	0.78847	NaN	NaN	NaN	NaN	NaN	NaN	NaN
1.0716	0.92425	0.96774	NaN	1.02	1.3594	NaN	0.96772	NaN	1.0989	0.90738	NaN	NaN	NaN	NaN	NaN	NaN	NaN	1.0857	NaN	NaN	NaN	0.95151	NaN	NaN	0.68157	0.75651	NaN	NaN	0.87943	NaN	NaN	NaN	NaN	NaN	0.80961	NaN	0.71756	1.0368	0.8383	0.86191	1.0965	NaN	NaN	NaN	1.0968	0.75807	NaN	NaN	NaN
0.91979	0.74322	1.0121	0.78879	0.79089	1.266	0.33353	0.69594	0.74521	0.70727	0.62334	0.80897	0.66005	0.70303	0.79924	0.8511	0.70313	0.99197	0.74177	0.63022	0.94937	0.69855	0.85013	1.1963	0.82318	0.71216	0.99519	0.72818	0.66089	0.82757	0.95497	0.85986	0.85823	0.8332	0.5106	1.1274	0.75015	0.85493	1.2025	0.99442	0.56718	1.0622	0.87307	0.62889	1.055	0.97916	0.74374	0.56419	1.3898	0.64286
NaN	NaN	NaN	NaN	NaN	NaN	NaN	NaN	NaN	NaN	NaN	NaN	NaN	NaN	NaN	NaN	NaN	NaN	NaN	NaN	NaN	NaN	NaN	NaN	NaN	NaN	NaN	NaN	NaN	NaN	NaN	NaN	NaN	NaN	0.49301	NaN	NaN	NaN	NaN	NaN	NaN	NaN	NaN	NaN	NaN	NaN	NaN	NaN	NaN	NaN
0.95354	0.78424	0.95499	0.66078	0.779	0.9835	0.40461	0.7132	0.93737	0.73927	0.6559	0.80029	0.64533	0.69315	0.81054	0.93111	0.67755	0.8715	0.75491	0.63128	0.80462	0.62578	0.74116	0.86408	0.77172	0.81467	0.80218	0.74478	0.74057	0.75534	0.8185	0.80522	0.8245	0.82956	0.65197	0.77388	0.62396	0.83829	0.90653	0.84015	0.64587	0.92124	0.79991	0.71226	0.91132	1.0812	0.73761	0.73704	1.2183	0.73994
NaN	NaN	NaN	NaN	NaN	NaN	NaN	NaN	NaN	NaN	NaN	NaN	NaN	NaN	NaN	NaN	NaN	NaN	NaN	NaN	0.7007	NaN	NaN	NaN	NaN	NaN	NaN	NaN	NaN	NaN	NaN	NaN	NaN	NaN	NaN	NaN	NaN	NaN	NaN	NaN	NaN	NaN	NaN	NaN	NaN	NaN	NaN	NaN	NaN	NaN
NaN	NaN	0.86644	NaN	NaN	NaN	NaN	NaN	NaN	0.70732	NaN	0.79059	NaN	NaN	0.98904	NaN	NaN	1.0396	NaN	NaN	NaN	NaN	NaN	NaN	NaN	NaN	0.93081	NaN	NaN	0.88278	NaN	NaN	0.99037	0.73395	NaN	1.2043	NaN	NaN	1.0275	0.71714	NaN	1.1526	0.6601	NaN	0.96789	NaN	0.78463	NaN	1.2394	NaN
NaN	NaN	NaN	NaN	NaN	NaN	NaN	NaN	NaN	NaN	NaN	NaN	NaN	NaN	NaN	NaN	NaN	NaN	NaN	NaN	NaN	NaN	NaN	NaN	NaN	NaN	NaN	NaN	NaN	NaN	NaN	NaN	NaN	NaN	NaN	NaN	NaN	NaN	NaN	NaN	NaN	NaN	NaN	NaN	NaN	NaN	NaN	NaN	NaN	NaN
0.90472	0.79494	NaN	0.59992	0.7281	NaN	0.39766	0.68401	NaN	0.95382	NaN	NaN	0.60984	0.55345	NaN	0.87163	NaN	NaN	0.64062	0.47469	NaN	0.91792	0.56312	NaN	NaN	0.44115	NaN	0.67407	0.61431	NaN	NaN	NaN	NaN	0.65509	NaN	NaN	NaN	NaN	NaN	NaN	0.40874	NaN	NaN	0.43612	NaN	0.89477	NaN	0.51793	NaN	0.42698
NaN	NaN	NaN	NaN	NaN	NaN	NaN	NaN	NaN	NaN	NaN	NaN	NaN	NaN	NaN	NaN	NaN	NaN	NaN	NaN	NaN	NaN	NaN	NaN	NaN	NaN	NaN	NaN	NaN	NaN	NaN	NaN	NaN	NaN	NaN	NaN	NaN	NaN	NaN	NaN	NaN	NaN	NaN	NaN	NaN	NaN	NaN	NaN	NaN	NaN
1.0183	0.76105	1.1287	0.99715	0.94722	NaN	0.52806	0.66802	NaN	0.6057	0.94023	1.0858	0.72228	NaN	0.9223	1.0079	NaN	1.09	0.85378	0.5319	0.95365	0.85351	0.9647	1.3583	0.83015	0.57566	NaN	0.82412	0.70733	0.84744	0.7796	0.79376	1.1503	0.83963	0.80813	NaN	0.76369	NaN	NaN	0.87912	0.80312	0.93197	0.87745	NaN	1.0681	0.82794	NaN	0.46167	1.3192	0.84898
0.87896	0.74819	1.0564	0.6006	0.73214	1.0885	0.36953	0.67536	0.79605	0.57978	0.60296	0.79385	0.59151	0.62106	0.93165	0.76559	0.60829	0.96995	0.73597	0.57	0.85301	0.568	0.71296	0.91832	0.73986	0.71311	0.87114	0.68807	0.59112	0.88312	0.7071	0.74221	0.93457	0.71305	0.6793	0.99687	0.63279	0.6813	0.92092	0.706	0.56464	1.021	0.76339	0.63172	0.9036	1.0212	0.65814	0.67602	1.4149	0.78472
NaN	NaN	NaN	NaN	NaN	NaN	NaN	NaN	NaN	NaN	NaN	NaN	NaN	NaN	NaN	NaN	NaN	NaN	NaN	NaN	NaN	NaN	NaN	NaN	NaN	NaN	NaN	NaN	NaN	NaN	NaN	NaN	NaN	NaN	NaN	NaN	NaN	NaN	NaN	NaN	NaN	NaN	NaN	NaN	NaN	NaN	NaN	NaN	NaN	NaN
NaN	NaN	NaN	NaN	NaN	NaN	NaN	NaN	NaN	NaN	NaN	NaN	NaN	NaN	NaN	NaN	NaN	NaN	NaN	NaN	NaN	NaN	NaN	NaN	NaN	NaN	NaN	NaN	NaN	NaN	NaN	NaN	NaN	NaN	NaN	NaN	NaN	NaN	NaN	NaN	NaN	NaN	NaN	NaN	NaN	NaN	NaN	NaN	NaN	NaN
NaN	NaN	NaN	NaN	NaN	NaN	NaN	NaN	NaN	NaN	NaN	NaN	NaN	NaN	NaN	NaN	NaN	NaN	NaN	NaN	NaN	NaN	NaN	NaN	NaN	NaN	0.74408	NaN	NaN	NaN	NaN	NaN	NaN	NaN	NaN	NaN	NaN	NaN	0.81227	NaN	NaN	0.78126	NaN	NaN	NaN	NaN	NaN	NaN	NaN	NaN
0.90579	0.68475	NaN	0.6526	0.96393	NaN	0.44002	0.80478	NaN	0.92874	0.63538	NaN	0.76525	NaN	0.92055	0.91895	NaN	1.4552	0.87003	0.72147	NaN	0.67247	0.70409	1.2785	0.73377	1.0507	0.95993	0.62711	NaN	NaN	0.78117	0.82972	NaN	0.691	0.85909	0.86463	0.60921	0.70664	NaN	0.90463	0.72812	NaN	0.81503	0.90929	NaN	1.1172	0.83101	0.78491	0.97342	0.77289
0.82685	0.74719	1.0198	NaN	0.37121	1.06	0.25985	NaN	0.9258	1.568	NaN	0.77194	0.44922	NaN	0.77234	0.86819	NaN	0.88304	0.76788	0.73314	0.74083	2.0998	0.44605	0.91157	0.39718	0.40062	0.61637	NaN	NaN	0.55545	0.76651	0.52063	0.78086	0.78124	0.39564	0.8197	0.88751	0.4725	0.80342	0.64381	0.26852	0.84913	0.65913	NaN	0.67064	NaN	0.57961	0.28307	1.0631	0.33413
NaN	0.6646	1.1378	NaN	0.61242	1.2597	NaN	0.55965	0.7419	NaN	NaN	0.89467	NaN	0.68937	0.86654	NaN	0.68415	0.85453	NaN	0.79224	0.89855	NaN	NaN	0.9372	NaN	0.50454	0.77144	NaN	0.53796	0.56406	0.79579	NaN	0.84294	NaN	0.50035	0.98604	NaN	NaN	0.89622	NaN	0.32781	0.95029	NaN	NaN	NaN	NaN	0.71732	NaN	1.2571	0.45065
NaN	NaN	NaN	NaN	NaN	NaN	NaN	NaN	NaN	NaN	NaN	NaN	NaN	NaN	NaN	NaN	NaN	NaN	NaN	NaN	NaN	NaN	NaN	NaN	NaN	NaN	NaN	NaN	NaN	NaN	NaN	NaN	NaN	NaN	NaN	NaN	NaN	NaN	NaN	NaN	NaN	NaN	NaN	NaN	NaN	NaN	NaN	NaN	NaN	NaN
NaN	NaN	NaN	NaN	NaN	NaN	NaN	NaN	NaN	NaN	NaN	NaN	NaN	NaN	NaN	NaN	NaN	NaN	NaN	NaN	NaN	NaN	NaN	NaN	NaN	NaN	NaN	NaN	NaN	NaN	NaN	NaN	NaN	NaN	NaN	NaN	NaN	NaN	NaN	NaN	NaN	NaN	NaN	NaN	NaN	NaN	NaN	NaN	NaN	NaN
0.88889	0.65755	NaN	NaN	1.0308	NaN	NaN	0.66028	NaN	2.6208	0.74726	NaN	NaN	NaN	NaN	NaN	NaN	NaN	NaN	0.68539	NaN	1.7048	NaN	NaN	NaN	0.58644	NaN	NaN	0.66255	NaN	0.69947	0.74877	NaN	0.81323	NaN	NaN	NaN	NaN	NaN	NaN	NaN	NaN	0.58682	NaN	NaN	0.71797	NaN	NaN	NaN	NaN
0.95185	0.82562	0.93052	0.6816	0.62473	1.3327	0.35244	0.59249	0.87705	1.954	0.5758	1.052	0.81187	0.64329	0.95929	1.1288	0.63151	1.0088	0.95403	0.69198	0.87911	2.0914	0.68047	1.1148	0.73776	0.50606	0.98637	0.96525	0.61705	0.78388	0.9217	0.66893	1.0938	0.80086	0.5579	1.1667	0.69849	0.59398	1.2112	0.67401	0.39977	1.0815	0.56478	0.4071	0.7912	0.67504	0.76286	0.43128	1.291	0.42124
0.94442	0.83672	0.94135	0.71723	0.80451	1.4348	0.40915	0.71513	0.86225	0.71718	0.66072	0.82663	0.78606	0.67486	0.77839	0.87626	0.6634	0.97842	0.76187	0.73322	0.85643	0.62288	0.75123	0.9617	0.84793	0.69941	0.66425	0.7257	0.61469	0.84184	0.80345	0.77963	0.91248	0.75838	0.848	0.85977	0.55894	0.88671	0.77683	0.67746	0.7453	0.72178	0.63053	0.876	0.67291	1.0131	0.50942	0.71089	1.1161	0.8205
0.92998	0.82657	1.1393	0.68171	0.89358	1.2588	0.41328	0.80692	1.0301	0.69701	0.73414	1.0331	0.69587	0.85442	1.1455	0.84378	0.73963	1.1039	0.75843	0.72773	1.0517	0.66523	0.7679	1.1274	0.80382	0.79613	1.0748	0.72603	0.73925	1.0908	0.81333	0.89358	1.0243	0.73613	0.58365	1.204	0.66003	0.87469	1.1329	0.80734	0.60505	1.1642	0.78092	0.68237	1.0454	1.0826	0.75545	0.75883	1.4341	0.7368
1.0206	0.71878	1.0622	0.80559	0.91844	1.3311	0.50774	0.72267	0.63265	0.66368	0.58991	1.072	0.73449	0.64118	0.82979	0.96369	0.55987	0.92813	0.81353	0.51445	0.80766	0.69877	0.60877	1.0805	0.83277	0.64415	0.94303	0.84168	0.65586	1.053	0.87099	0.80722	1.0446	0.73617	0.50411	0.95054	0.6593	0.62721	1.0106	0.9541	0.52792	1.1271	0.82336	0.58502	0.86579	0.93884	0.74939	0.58903	1.2155	0.63426
NaN	1.4108	NaN	NaN	NaN	NaN	NaN	NaN	NaN	NaN	NaN	NaN	NaN	1.0017	NaN	NaN	NaN	NaN	NaN	NaN	NaN	NaN	NaN	NaN	NaN	NaN	NaN	NaN	NaN	NaN	NaN	NaN	NaN	NaN	NaN	NaN	NaN	NaN	NaN	NaN	NaN	NaN	NaN	NaN	NaN	1.4318	NaN	NaN	NaN	NaN
0.70157	1.0699	NaN	0.76554	0.8964	NaN	0.32196	0.84162	0.82293	0.62292	0.65751	NaN	0.61347	0.77087	NaN	0.75798	0.71628	NaN	0.56219	0.66631	NaN	NaN	0.76521	NaN	0.77374	0.69303	NaN	0.58732	NaN	NaN	0.79283	0.75725	NaN	0.92438	0.60152	NaN	0.65635	0.73585	NaN	0.70958	0.61036	NaN	0.8195	0.70078	NaN	1.1995	NaN	0.79007	NaN	0.70372
1.1144	0.95911	0.9961	0.75371	0.79701	1.2692	NaN	0.72269	NaN	0.92322	0.61145	0.82423	0.64864	0.67867	0.91973	1.0069	0.61283	1.2751	0.76613	0.50651	0.74156	0.72494	0.68978	NaN	0.72968	0.62909	NaN	0.71582	0.66782	NaN	0.83402	0.71894	0.99879	0.80836	0.58104	0.93422	0.58982	0.7396	1.0692	0.81672	0.56076	1.0059	0.68734	0.63555	0.89392	0.97727	NaN	0.57887	1.1783	0.6328
NaN	NaN	NaN	NaN	NaN	NaN	NaN	NaN	NaN	NaN	NaN	NaN	NaN	NaN	NaN	NaN	NaN	NaN	NaN	NaN	NaN	NaN	NaN	NaN	NaN	NaN	NaN	NaN	NaN	NaN	NaN	NaN	NaN	NaN	NaN	NaN	NaN	NaN	NaN	NaN	NaN	NaN	NaN	NaN	NaN	NaN	NaN	NaN	NaN	NaN
0.88021	NaN	NaN	0.61396	NaN	NaN	0.33836	NaN	NaN	1.0372	NaN	NaN	0.63127	NaN	NaN	NaN	NaN	NaN	0.79412	0.70096	NaN	0.57592	NaN	NaN	0.77136	0.58669	NaN	NaN	NaN	NaN	0.64045	0.71186	NaN	0.64656	0.50029	NaN	0.57546	NaN	NaN	0.66046	NaN	NaN	0.62334	0.67651	NaN	0.91428	NaN	0.49945	NaN	NaN
NaN	NaN	NaN	NaN	NaN	NaN	NaN	NaN	NaN	NaN	NaN	NaN	NaN	NaN	NaN	NaN	NaN	NaN	NaN	NaN	NaN	NaN	NaN	NaN	NaN	NaN	NaN	NaN	NaN	NaN	NaN	NaN	NaN	NaN	NaN	NaN	NaN	NaN	NaN	NaN	NaN	NaN	NaN	NaN	NaN	NaN	NaN	NaN	NaN	NaN
NaN	NaN	NaN	NaN	NaN	NaN	NaN	NaN	NaN	NaN	NaN	NaN	NaN	NaN	NaN	NaN	NaN	NaN	NaN	NaN	NaN	NaN	NaN	NaN	NaN	NaN	NaN	NaN	NaN	NaN	NaN	NaN	NaN	NaN	NaN	NaN	NaN	NaN	NaN	NaN	NaN	NaN	0.82461	NaN	NaN	NaN	NaN	NaN	NaN	NaN
0.79662	NaN	NaN	NaN	NaN	NaN	NaN	NaN	NaN	NaN	NaN	NaN	NaN	NaN	NaN	NaN	NaN	NaN	0.46601	NaN	NaN	0.46278	NaN	NaN	0.82892	NaN	NaN	0.47056	NaN	NaN	0.89611	NaN	NaN	0.6461	NaN	NaN	0.4756	NaN	NaN	0.73283	NaN	NaN	0.86733	NaN	NaN	NaN	NaN	NaN	NaN	NaN
0.96976	0.78593	0.9787	0.66541	0.69424	1.0102	0.40511	0.64589	0.96083	0.73842	0.61418	0.72222	0.60585	0.6422	1.0391	0.86171	0.58517	0.97218	0.72756	0.59975	0.91201	0.67233	0.70659	0.91144	0.73665	0.75233	0.7651	0.73702	0.60626	0.85475	0.7831	0.77035	0.92202	0.78895	0.74008	1.1194	0.60561	0.8113	1.0803	0.79349	0.69514	0.88353	0.77177	0.69364	1.0471	0.99539	0.75011	0.76799	1.4084	0.64257
NaN	NaN	NaN	NaN	NaN	NaN	NaN	NaN	NaN	NaN	NaN	NaN	NaN	NaN	NaN	NaN	NaN	NaN	NaN	NaN	NaN	NaN	NaN	NaN	NaN	NaN	NaN	NaN	NaN	NaN	NaN	NaN	NaN	NaN	NaN	NaN	NaN	NaN	NaN	NaN	NaN	NaN	NaN	NaN	NaN	NaN	NaN	NaN	NaN	NaN
0.91977	0.77695	0.97718	0.76613	0.69745	1.0844	0.4646	0.5633	0.78015	0.74122	0.5412	0.85025	0.60032	0.68357	0.89451	0.82414	0.60187	0.80201	0.66887	0.57598	0.84202	0.83731	0.65748	0.95227	0.75817	0.67878	0.68612	0.84418	0.6135	0.67986	0.85362	0.72797	0.86526	0.78422	0.67837	1.0427	0.50298	0.72717	0.69889	0.94012	0.61562	1.0425	0.62582	0.71175	0.87669	1.0752	0.6809	0.76522	1.1721	0.79546
NaN	NaN	NaN	NaN	NaN	NaN	NaN	NaN	NaN	NaN	NaN	NaN	NaN	NaN	NaN	NaN	NaN	NaN	NaN	NaN	NaN	NaN	NaN	NaN	NaN	NaN	NaN	NaN	NaN	NaN	NaN	NaN	NaN	NaN	NaN	NaN	NaN	NaN	NaN	NaN	NaN	NaN	NaN	NaN	NaN	NaN	NaN	NaN	NaN	NaN
0.80014	0.73365	1.0055	0.75706	0.86418	0.97522	0.53926	0.74281	1.1161	0.68891	0.5668	0.80094	0.84053	0.68027	0.99609	0.81941	0.63488	0.8384	0.88364	0.85908	NaN	0.69311	0.68501	1.0943	0.6679	0.57406	0.98151	0.78264	0.74411	0.84277	0.80629	1.1046	1.1847	0.91285	0.97041	1.0732	0.71429	0.69991	0.6197	0.92271	0.74075	0.79593	0.94585	0.79904	1.08	1.0842	0.61879	1.1186	1.4601	0.78848
0.7385	0.72514	0.99448	0.59743	0.7794	1.0163	0.35565	0.6405	0.93865	0.62617	0.64411	0.69246	0.64974	0.70362	0.88439	0.80607	0.73716	0.97846	0.71103	0.64924	0.92661	0.53573	0.77322	0.96859	0.69103	0.71116	0.76401	0.68689	0.68075	0.75453	0.76554	0.88018	0.9821	0.84345	0.83124	1.0145	0.7492	0.80145	0.94898	0.83954	0.7512	0.95514	0.78027	0.75308	0.96875	1.0399	0.69096	0.76793	1.257	0.65664
NaN	NaN	NaN	NaN	NaN	NaN	NaN	NaN	NaN	NaN	NaN	NaN	NaN	NaN	NaN	NaN	NaN	NaN	NaN	NaN	NaN	NaN	NaN	NaN	NaN	NaN	NaN	NaN	NaN	NaN	NaN	NaN	NaN	NaN	NaN	NaN	NaN	NaN	NaN	NaN	NaN	NaN	NaN	NaN	NaN	NaN	NaN	NaN	NaN	NaN
NaN	0.82762	NaN	0.58156	NaN	NaN	0.32578	NaN	NaN	0.81125	NaN	NaN	0.56698	0.63815	NaN	NaN	NaN	NaN	NaN	NaN	NaN	NaN	NaN	NaN	NaN	0.79446	NaN	NaN	NaN	NaN	NaN	0.59246	NaN	NaN	0.8043	NaN	NaN	NaN	NaN	NaN	NaN	NaN	NaN	NaN	NaN	NaN	NaN	1.1235	NaN	0.50554
NaN	NaN	NaN	NaN	NaN	NaN	NaN	NaN	NaN	NaN	NaN	NaN	NaN	NaN	NaN	NaN	NaN	NaN	NaN	NaN	NaN	NaN	NaN	NaN	NaN	NaN	NaN	NaN	NaN	NaN	NaN	NaN	NaN	NaN	NaN	NaN	NaN	NaN	NaN	NaN	NaN	NaN	NaN	NaN	NaN	NaN	NaN	NaN	NaN	NaN
1.0251	0.81808	1.1481	0.94169	0.70133	NaN	0.75498	0.61298	0.95719	0.82736	0.61204	0.84567	0.82524	0.69645	0.84014	0.86003	0.7067	0.90399	0.84762	0.84494	0.70882	0.83453	0.70839	0.95328	0.56283	0.66243	0.82784	0.958	0.50186	0.75434	0.74834	0.94976	0.8899	0.74543	0.53847	0.93684	0.88545	0.81069	1.0197	1.1649	0.56416	0.97629	0.74797	0.93588	0.90771	1.2214	0.72859	0.76254	1.2933	0.75427
0.86679	0.7088	1.0972	0.73281	0.62681	1.1371	0.34203	0.57806	0.80581	0.9155	0.50526	0.93661	0.65705	0.56659	0.75227	0.85793	0.48956	0.91796	0.63566	0.59613	0.79415	0.84758	0.61068	1.003	0.72174	0.60684	0.75717	0.6952	0.61112	NaN	0.66713	0.67554	0.90204	0.74716	0.4509	0.90312	0.80321	0.46843	0.85893	0.68786	0.51333	0.92074	0.76246	0.53044	0.88569	0.79785	0.63292	0.58995	1.1716	0.6545
NaN	NaN	NaN	NaN	NaN	NaN	NaN	NaN	NaN	NaN	NaN	NaN	NaN	NaN	NaN	NaN	NaN	0.80143	NaN	NaN	NaN	NaN	NaN	0.92974	NaN	NaN	0.7473	NaN	NaN	NaN	NaN	NaN	NaN	NaN	NaN	0.79779	NaN	NaN	NaN	NaN	NaN	NaN	NaN	NaN	NaN	NaN	NaN	NaN	NaN	NaN
NaN	NaN	NaN	NaN	NaN	NaN	NaN	NaN	NaN	NaN	NaN	NaN	NaN	1.0484	NaN	1.3598	NaN	NaN	NaN	NaN	NaN	NaN	NaN	NaN	NaN	NaN	NaN	NaN	NaN	NaN	0.89397	NaN	NaN	0.5996	NaN	NaN	NaN	NaN	NaN	NaN	NaN	NaN	NaN	NaN	NaN	NaN	NaN	NaN	NaN	NaN
0.86775	0.65247	0.91138	0.89491	NaN	1.0496	NaN	0.8224	0.73584	0.9151	0.78343	0.78611	0.46982	0.78277	0.70784	0.75308	0.75452	0.88301	0.38025	NaN	0.85523	0.65137	0.76004	0.80013	0.50716	0.84644	0.77085	0.44753	0.7566	0.66872	NaN	NaN	0.93049	0.60381	NaN	1.4858	0.91729	0.56048	0.85396	0.8222	NaN	0.71902	0.69483	0.33522	0.74135	0.65526	0.46134	NaN	0.90296	NaN
0.85889	0.72495	1.0767	0.62507	0.83751	1.132	0.37135	0.76043	0.81846	0.56172	0.68446	0.99264	0.67715	0.69004	1.0665	0.84322	0.77966	0.93864	0.6754	0.70098	0.94204	0.55359	0.76883	0.98633	0.81705	0.78966	0.94107	0.72455	0.67263	0.82022	0.81986	0.77155	1.0631	0.79082	0.62095	1.1271	0.66015	0.83288	0.92018	0.77195	0.61806	1.0854	0.81092	0.7127	0.95586	0.97566	0.79265	0.4376	1.3395	0.70039
0.6787	0.6055	0.96089	0.64558	0.76602	0.93143	0.39923	0.51531	0.79499	0.65582	0.46995	0.67922	0.6796	0.60442	0.69872	0.89807	0.5697	0.82329	0.67044	0.51671	0.85381	0.49617	0.68999	0.82097	0.59552	0.68223	0.95761	0.62786	0.52974	0.7768	0.90597	0.83983	0.84202	0.62331	0.54213	0.78845	0.63053	0.8259	0.95574	0.68098	0.34561	1.3011	0.67729	0.40968	0.97099	0.72404	0.71606	0.45592	0.87909	0.72125
0.89947	0.84324	0.96492	0.67693	0.80623	1.073	0.42539	0.72407	0.85771	0.6786	0.71084	0.86693	0.68683	0.77873	0.94528	0.88869	0.71876	1.003	0.76766	0.6716	0.89042	0.60111	0.72782	1.0342	0.78471	0.81025	0.86537	0.77412	0.69843	0.88005	0.81248	0.84635	0.91789	0.77974	0.67479	1.0236	0.65628	0.80506	0.99647	0.80051	0.73198	1.0888	0.78974	0.81364	0.97517	1.1654	0.79246	0.81476	1.327	0.81192
NaN	NaN	NaN	NaN	NaN	NaN	NaN	NaN	NaN	NaN	NaN	NaN	NaN	NaN	NaN	NaN	NaN	NaN	NaN	NaN	NaN	NaN	NaN	NaN	NaN	NaN	NaN	NaN	NaN	NaN	NaN	NaN	NaN	NaN	NaN	NaN	NaN	NaN	NaN	NaN	NaN	NaN	NaN	NaN	NaN	NaN	NaN	NaN	NaN	NaN
NaN	0.80203	NaN	NaN	NaN	0.90332	NaN	NaN	1.0372	0.68282	NaN	NaN	NaN	NaN	1.0636	NaN	NaN	NaN	NaN	NaN	0.79704	NaN	0.55776	1.0811	0.74855	NaN	NaN	NaN	NaN	NaN	NaN	NaN	1.0551	NaN	0.51397	1.1269	NaN	NaN	0.98785	NaN	0.43432	0.8479	NaN	NaN	NaN	NaN	0.65115	NaN	NaN	NaN
0.87365	0.77141	1.0467	0.60021	0.76131	1.3212	0.41141	0.70108	NaN	0.5604	0.64716	0.92635	0.60954	0.68616	1.0831	0.7402	0.66918	0.98022	0.66544	0.63973	1.0359	0.65594	0.67583	1.0671	0.71999	0.72281	0.81389	0.65221	0.62877	0.81605	0.73414	0.76363	1.0348	0.78353	0.62062	1.0094	0.63541	0.73479	1.0256	0.74202	0.55234	1.2008	0.76445	0.68232	0.99791	1.0086	0.76011	0.71478	1.2129	0.694
0.84782	1.0045	0.99008	1.003	1.0285	1.3116	0.5645	0.99153	0.87616	0.91815	0.90112	0.7804	0.74358	0.88248	0.85173	1.0483	0.97691	1.0063	0.63392	0.63383	0.81682	0.57646	0.80077	1.0616	0.77073	0.97678	0.88584	0.75103	0.8021	0.74621	1.1128	0.88719	0.83519	0.90485	0.55787	0.84727	0.80289	1.1298	0.94935	0.78566	0.747	1.1061	0.716	0.8754	0.9959	1.004	0.60274	0.67193	1.2625	0.83478
NaN	NaN	NaN	NaN	NaN	NaN	NaN	NaN	NaN	NaN	NaN	NaN	NaN	NaN	NaN	NaN	NaN	NaN	NaN	NaN	NaN	NaN	NaN	NaN	NaN	NaN	NaN	NaN	NaN	NaN	NaN	NaN	NaN	NaN	NaN	NaN	NaN	NaN	NaN	NaN	NaN	NaN	NaN	NaN	NaN	NaN	NaN	NaN	NaN	NaN
NaN	NaN	NaN	0.52522	NaN	NaN	0.28386	NaN	NaN	0.60813	NaN	NaN	0.61342	NaN	NaN	0.7804	NaN	NaN	0.5767	NaN	NaN	0.48105	NaN	NaN	0.57685	NaN	NaN	0.63591	NaN	NaN	0.77919	NaN	NaN	0.61967	NaN	NaN	0.5527	NaN	NaN	NaN	NaN	NaN	0.64789	NaN	NaN	NaN	NaN	NaN	NaN	NaN
NaN	NaN	NaN	NaN	NaN	NaN	NaN	NaN	NaN	NaN	NaN	NaN	NaN	NaN	NaN	NaN	NaN	NaN	NaN	NaN	NaN	NaN	NaN	NaN	NaN	NaN	NaN	NaN	NaN	NaN	NaN	NaN	NaN	NaN	NaN	NaN	NaN	NaN	NaN	NaN	NaN	NaN	NaN	NaN	NaN	NaN	NaN	NaN	NaN	NaN
0.83182	0.65238	0.98465	0.61374	0.7007	0.94904	0.4433	0.58355	0.85638	0.69099	0.53546	0.76255	0.73553	0.60871	1.0184	0.83642	0.60106	0.92779	0.76994	0.49162	0.76406	0.62758	0.75297	0.84636	0.79911	0.66471	0.91134	0.70949	0.53331	0.73359	0.76512	0.78752	0.8401	0.81134	0.61365	1.0286	0.58994	0.72119	0.98273	0.77076	0.62508	1.0523	0.71241	0.6507	0.99208	0.98464	0.73663	0.62148	1.4333	0.713
0.88984	NaN	1.053	NaN	0.65778	NaN	NaN	NaN	NaN	0.68453	NaN	NaN	0.90873	0.58737	NaN	NaN	NaN	0.79376	NaN	NaN	0.80421	0.66454	NaN	NaN	0.69827	NaN	NaN	NaN	0.62845	0.84859	NaN	NaN	NaN	0.73491	NaN	0.73357	NaN	NaN	NaN	NaN	NaN	0.97835	NaN	NaN	NaN	NaN	NaN	NaN	1.1876	NaN
NaN	NaN	NaN	NaN	NaN	NaN	NaN	NaN	NaN	NaN	NaN	NaN	NaN	NaN	NaN	NaN	NaN	NaN	NaN	NaN	NaN	NaN	NaN	NaN	NaN	NaN	NaN	NaN	NaN	NaN	NaN	NaN	NaN	NaN	NaN	NaN	NaN	NaN	NaN	NaN	NaN	NaN	NaN	NaN	NaN	NaN	NaN	NaN	NaN	NaN
NaN	NaN	NaN	NaN	NaN	NaN	NaN	NaN	NaN	NaN	NaN	NaN	NaN	NaN	3.1777	NaN	NaN	NaN	NaN	NaN	NaN	NaN	NaN	NaN	NaN	NaN	NaN	NaN	NaN	NaN	NaN	NaN	NaN	NaN	NaN	NaN	NaN	NaN	NaN	NaN	NaN	NaN	NaN	NaN	NaN	NaN	NaN	NaN	NaN	NaN
0.71682	0.85712	1.022	0.6526	0.65109	NaN	0.35124	0.75761	1.6696	NaN	0.75376	0.93921	NaN	0.95248	0.89082	NaN	0.58349	1.0844	NaN	0.55881	NaN	NaN	0.66079	0.94014	0.75387	0.70453	0.96043	NaN	0.87135	NaN	0.68337	0.88801	0.65726	NaN	0.63743	0.85901	0.54967	1.0598	0.92955	NaN	0.65185	1.2983	0.71107	0.96981	0.76521	1.0566	0.73876	0.9802	1.335	0.97887
NaN	NaN	NaN	NaN	NaN	NaN	NaN	NaN	NaN	NaN	NaN	NaN	NaN	NaN	NaN	NaN	NaN	NaN	NaN	NaN	NaN	NaN	NaN	NaN	NaN	NaN	NaN	NaN	NaN	NaN	NaN	NaN	NaN	NaN	NaN	NaN	NaN	NaN	NaN	NaN	NaN	NaN	NaN	NaN	NaN	NaN	NaN	NaN	NaN	NaN
0.90975	0.7373	0.88608	0.5367	0.63906	1.0266	0.35611	0.5862	0.7877	0.63893	0.64083	0.86535	0.62311	0.70385	0.64051	0.79899	1.0294	0.73145	0.5934	0.58204	0.76173	0.53205	0.67838	0.79195	0.61057	0.72934	0.68881	0.66831	0.59419	0.70591	0.8015	0.73159	0.89074	0.68959	0.75324	0.98478	0.65248	0.65199	0.81052	0.75392	0.63545	0.89285	0.69918	0.63375	0.83477	0.92192	0.70459	0.70311	1.0552	0.63861
0.8418	0.59881	0.91535	0.67059	0.67973	0.68616	0.53291	0.5319	NaN	0.89371	0.46293	NaN	0.53166	0.67721	NaN	0.77655	0.52835	NaN	0.82398	0.50419	NaN	0.79881	0.67563	NaN	0.6676	0.6793	NaN	0.79254	NaN	NaN	0.73427	0.67948	NaN	0.85484	0.59917	NaN	0.73047	0.7703	NaN	0.96009	1.2964	NaN	0.84725	NaN	NaN	NaN	0.72173	NaN	1.1494	0.56586
NaN	NaN	NaN	NaN	NaN	NaN	NaN	NaN	NaN	NaN	NaN	NaN	NaN	NaN	NaN	0.87257	NaN	NaN	NaN	NaN	NaN	NaN	NaN	NaN	NaN	NaN	NaN	0.70062	NaN	NaN	NaN	NaN	NaN	0.8148	NaN	NaN	NaN	NaN	NaN	NaN	NaN	NaN	NaN	NaN	NaN	NaN	NaN	NaN	NaN	NaN
NaN	NaN	NaN	NaN	NaN	NaN	NaN	NaN	NaN	0.42236	NaN	NaN	NaN	NaN	NaN	NaN	NaN	NaN	NaN	NaN	NaN	NaN	NaN	NaN	NaN	NaN	NaN	NaN	NaN	NaN	NaN	NaN	NaN	NaN	NaN	NaN	NaN	NaN	NaN	NaN	NaN	NaN	NaN	NaN	NaN	NaN	NaN	NaN	NaN	NaN
NaN	NaN	NaN	NaN	NaN	NaN	NaN	NaN	NaN	NaN	NaN	NaN	NaN	NaN	NaN	NaN	NaN	NaN	NaN	NaN	NaN	NaN	NaN	NaN	NaN	NaN	NaN	NaN	NaN	NaN	NaN	NaN	NaN	NaN	NaN	NaN	NaN	NaN	NaN	NaN	NaN	NaN	NaN	NaN	NaN	NaN	NaN	NaN	NaN	NaN
NaN	NaN	NaN	NaN	NaN	NaN	NaN	NaN	NaN	NaN	NaN	NaN	NaN	NaN	NaN	NaN	NaN	NaN	NaN	NaN	0.75133	NaN	NaN	NaN	NaN	NaN	NaN	NaN	NaN	NaN	NaN	NaN	NaN	NaN	NaN	NaN	NaN	NaN	NaN	NaN	NaN	NaN	NaN	NaN	NaN	NaN	NaN	NaN	NaN	NaN
NaN	NaN	NaN	NaN	NaN	NaN	NaN	NaN	NaN	NaN	NaN	NaN	NaN	NaN	NaN	NaN	NaN	NaN	NaN	NaN	NaN	NaN	NaN	NaN	NaN	NaN	NaN	NaN	NaN	NaN	NaN	NaN	NaN	NaN	NaN	NaN	NaN	NaN	NaN	NaN	NaN	NaN	NaN	NaN	NaN	NaN	NaN	NaN	NaN	NaN
NaN	NaN	NaN	NaN	NaN	NaN	NaN	NaN	NaN	NaN	NaN	NaN	0.68652	NaN	NaN	0.87253	NaN	NaN	NaN	NaN	NaN	0.59958	NaN	NaN	0.56119	NaN	NaN	0.67054	NaN	NaN	0.84339	NaN	NaN	0.74488	NaN	NaN	NaN	NaN	NaN	NaN	NaN	NaN	0.62404	NaN	NaN	NaN	NaN	NaN	NaN	NaN
0.86421	0.68326	1.0197	0.58474	0.5797	1.165	0.46098	0.48061	1.0317	0.93787	0.48454	0.87851	0.55069	0.47572	0.86155	0.80701	NaN	0.95695	0.58988	0.89689	NaN	1.1321	0.7492	0.95352	0.56721	0.66912	0.67754	0.79588	NaN	0.76294	0.79794	NaN	0.85554	0.76635	0.32633	1.1777	0.8044	0.72139	1.0766	0.67055	0.4669	1.0517	0.69823	0.74776	0.90328	1.0824	0.78959	NaN	0.84176	NaN
0.91323	0.90585	1.0428	0.66718	0.91777	1.2654	0.38122	0.73929	0.95407	0.84779	0.75244	1.106	0.74492	0.79524	0.86933	0.89042	0.84445	1.0265	0.7983	0.70118	0.86875	0.65463	0.7557	1.0969	0.73663	0.87794	1.1477	0.72116	0.65797	0.87114	0.97209	0.81933	0.98876	0.88433	0.98589	0.88463	0.58527	0.84468	0.95444	0.88156	0.76157	1.1645	0.66662	0.93978	1.0741	1.0622	0.78591	1.0029	1.3853	1.0525
1.243	NaN	NaN	1.5669	NaN	NaN	NaN	NaN	NaN	1.1176	NaN	NaN	1.1028	NaN	NaN	NaN	NaN	NaN	0.77076	NaN	NaN	NaN	NaN	NaN	NaN	NaN	NaN	NaN	NaN	NaN	NaN	NaN	NaN	NaN	NaN	NaN	NaN	NaN	NaN	NaN	NaN	NaN	NaN	NaN	NaN	NaN	NaN	NaN	NaN	NaN
NaN	NaN	NaN	NaN	NaN	NaN	NaN	NaN	NaN	NaN	NaN	NaN	NaN	NaN	NaN	NaN	NaN	NaN	NaN	NaN	NaN	NaN	NaN	NaN	NaN	NaN	NaN	NaN	NaN	NaN	NaN	NaN	NaN	NaN	NaN	NaN	NaN	NaN	NaN	NaN	NaN	NaN	NaN	NaN	NaN	NaN	NaN	NaN	NaN	NaN
NaN	0.60519	NaN	0.66931	0.75338	0.94452	0.39002	0.6839	0.86628	0.50367	0.4957	NaN	NaN	NaN	0.71304	0.78837	0.60457	0.92073	0.7734	0.65662	0.80212	NaN	0.69656	0.98825	0.75388	0.77259	0.75761	0.70857	0.64569	0.70412	NaN	0.82222	0.89375	0.86368	0.52566	1.035	NaN	0.74884	0.98878	1.2277	NaN	1.1176	0.7777	0.51066	0.87473	NaN	0.62863	NaN	1.117	NaN
0.89083	0.72288	0.98817	0.55676	0.88307	1.2375	0.38216	0.88853	0.79703	0.80737	0.79193	0.95036	0.62829	0.8576	1.1154	0.75581	0.78346	1.1106	0.69572	0.73084	0.81881	0.63438	0.66766	1.2259	0.73783	0.93416	0.64848	0.62965	0.65312	0.7444	0.69411	0.87138	1.1169	0.72876	0.77249	NaN	0.60338	0.92219	1.1364	0.7977	0.87235	1.1253	0.65325	0.86295	0.85981	1.1039	0.61849	0.89364	1.4051	1.1976
NaN	NaN	NaN	NaN	NaN	NaN	NaN	NaN	NaN	NaN	NaN	NaN	NaN	NaN	NaN	NaN	NaN	NaN	NaN	NaN	NaN	NaN	NaN	NaN	NaN	NaN	NaN	NaN	NaN	NaN	NaN	NaN	NaN	NaN	NaN	NaN	NaN	NaN	NaN	NaN	NaN	NaN	NaN	NaN	NaN	NaN	NaN	NaN	NaN	NaN
NaN	NaN	NaN	NaN	NaN	NaN	NaN	NaN	NaN	NaN	NaN	NaN	NaN	NaN	NaN	NaN	NaN	NaN	NaN	NaN	NaN	NaN	NaN	NaN	NaN	NaN	NaN	NaN	NaN	NaN	NaN	NaN	NaN	NaN	NaN	NaN	NaN	NaN	NaN	NaN	NaN	NaN	NaN	NaN	NaN	NaN	NaN	NaN	NaN	NaN
NaN	NaN	NaN	NaN	NaN	NaN	NaN	NaN	NaN	NaN	NaN	NaN	NaN	NaN	NaN	NaN	NaN	NaN	NaN	NaN	NaN	NaN	NaN	NaN	NaN	NaN	NaN	NaN	NaN	NaN	NaN	NaN	NaN	NaN	NaN	NaN	NaN	NaN	NaN	NaN	NaN	NaN	NaN	NaN	NaN	NaN	NaN	NaN	NaN	NaN
NaN	NaN	NaN	NaN	NaN	NaN	NaN	NaN	NaN	NaN	NaN	NaN	NaN	NaN	NaN	NaN	NaN	NaN	NaN	NaN	NaN	NaN	NaN	NaN	NaN	NaN	NaN	NaN	NaN	NaN	NaN	NaN	NaN	NaN	NaN	NaN	NaN	NaN	NaN	NaN	NaN	NaN	NaN	NaN	NaN	NaN	NaN	NaN	NaN	NaN
NaN	NaN	NaN	NaN	NaN	NaN	NaN	NaN	NaN	NaN	NaN	NaN	0.56977	NaN	NaN	NaN	NaN	NaN	NaN	NaN	NaN	NaN	NaN	NaN	NaN	NaN	NaN	NaN	NaN	NaN	NaN	NaN	NaN	NaN	NaN	NaN	NaN	NaN	NaN	NaN	NaN	NaN	NaN	NaN	NaN	NaN	NaN	NaN	NaN	NaN
NaN	NaN	NaN	NaN	NaN	NaN	NaN	NaN	NaN	NaN	NaN	NaN	NaN	NaN	NaN	0.86661	NaN	NaN	NaN	NaN	NaN	NaN	NaN	NaN	NaN	NaN	NaN	NaN	NaN	NaN	0.9405	NaN	NaN	NaN	NaN	NaN	NaN	NaN	NaN	NaN	NaN	NaN	NaN	NaN	NaN	NaN	NaN	NaN	NaN	NaN
NaN	NaN	NaN	NaN	NaN	NaN	NaN	NaN	NaN	NaN	NaN	NaN	NaN	NaN	NaN	NaN	NaN	NaN	NaN	NaN	NaN	NaN	NaN	NaN	NaN	NaN	NaN	NaN	NaN	NaN	NaN	NaN	NaN	NaN	NaN	NaN	NaN	NaN	NaN	NaN	NaN	NaN	NaN	NaN	NaN	NaN	NaN	NaN	NaN	NaN
NaN	0.9666	NaN	NaN	NaN	NaN	NaN	0.64058	NaN	NaN	NaN	NaN	NaN	0.65385	NaN	NaN	0.5708	NaN	NaN	NaN	NaN	NaN	NaN	NaN	NaN	0.55025	NaN	NaN	NaN	NaN	NaN	NaN	NaN	NaN	0.72274	NaN	NaN	0.57293	NaN	NaN	0.76779	NaN	NaN	1.1884	NaN	1.2534	NaN	0.90761	NaN	0.72706
NaN	NaN	NaN	NaN	0.60383	NaN	NaN	NaN	NaN	NaN	NaN	NaN	NaN	NaN	NaN	NaN	NaN	NaN	0.85236	0.56856	NaN	NaN	NaN	NaN	NaN	0.63336	NaN	NaN	0.61734	NaN	0.70988	NaN	NaN	0.86615	NaN	NaN	NaN	0.51841	NaN	NaN	0.4139	NaN	NaN	NaN	NaN	0.81263	NaN	0.50041	NaN	0.36907
NaN	NaN	NaN	NaN	NaN	NaN	NaN	NaN	NaN	NaN	NaN	NaN	NaN	NaN	NaN	NaN	NaN	NaN	NaN	NaN	NaN	NaN	NaN	NaN	NaN	NaN	NaN	NaN	NaN	NaN	NaN	NaN	NaN	NaN	NaN	NaN	NaN	NaN	NaN	NaN	NaN	NaN	NaN	NaN	NaN	NaN	NaN	NaN	NaN	NaN
NaN	NaN	NaN	NaN	NaN	NaN	NaN	NaN	NaN	NaN	NaN	NaN	NaN	NaN	NaN	NaN	NaN	NaN	NaN	NaN	NaN	NaN	NaN	NaN	NaN	NaN	NaN	NaN	NaN	NaN	NaN	NaN	NaN	NaN	NaN	NaN	NaN	NaN	NaN	NaN	NaN	NaN	NaN	NaN	NaN	NaN	NaN	NaN	NaN	NaN
NaN	NaN	NaN	NaN	NaN	NaN	NaN	NaN	NaN	NaN	NaN	NaN	NaN	NaN	NaN	NaN	NaN	NaN	NaN	NaN	NaN	NaN	NaN	NaN	NaN	NaN	NaN	NaN	NaN	NaN	NaN	NaN	NaN	NaN	NaN	NaN	NaN	NaN	NaN	NaN	NaN	NaN	NaN	NaN	NaN	NaN	NaN	NaN	NaN	NaN
NaN	NaN	NaN	NaN	NaN	NaN	NaN	NaN	NaN	NaN	NaN	NaN	NaN	NaN	NaN	NaN	NaN	NaN	NaN	NaN	NaN	NaN	NaN	NaN	NaN	NaN	NaN	NaN	NaN	NaN	NaN	NaN	NaN	NaN	NaN	NaN	NaN	NaN	NaN	NaN	NaN	NaN	NaN	NaN	NaN	NaN	NaN	NaN	NaN	NaN
0.82702	0.67122	1.0692	0.53847	0.68371	1.2336	0.34309	0.58421	0.77561	0.59082	0.56226	0.87821	0.54575	0.61585	0.96005	0.8174	0.63347	1.0481	0.65924	0.52104	0.85187	0.55591	0.67854	1.0512	0.71888	0.6376	0.88712	0.71892	0.57426	0.89631	0.75445	0.71897	0.94645	0.71489	0.5848	0.98996	0.61916	0.72289	1.0902	0.80427	0.60405	1.0334	0.69626	0.67755	0.95346	0.92802	0.67848	0.65185	1.3534	0.68135
NaN	NaN	NaN	NaN	NaN	NaN	NaN	NaN	NaN	NaN	NaN	NaN	NaN	NaN	NaN	NaN	NaN	NaN	NaN	NaN	NaN	NaN	NaN	NaN	NaN	NaN	NaN	NaN	NaN	NaN	NaN	NaN	NaN	NaN	NaN	NaN	NaN	NaN	NaN	NaN	NaN	NaN	NaN	NaN	NaN	NaN	NaN	NaN	NaN	NaN
NaN	NaN	NaN	NaN	NaN	NaN	NaN	NaN	NaN	NaN	NaN	NaN	NaN	NaN	NaN	NaN	NaN	NaN	NaN	NaN	NaN	NaN	NaN	NaN	NaN	NaN	NaN	NaN	NaN	NaN	NaN	NaN	NaN	NaN	NaN	NaN	NaN	NaN	NaN	NaN	NaN	NaN	NaN	NaN	NaN	NaN	NaN	NaN	NaN	NaN
NaN	NaN	NaN	NaN	NaN	NaN	NaN	0.77134	NaN	NaN	0.66967	NaN	NaN	0.69051	NaN	0.95361	0.67345	1.0544	NaN	0.72409	NaN	NaN	0.75328	NaN	NaN	0.73485	NaN	NaN	0.69141	NaN	NaN	0.87193	NaN	NaN	0.5986	NaN	NaN	0.85451	1.0835	NaN	0.56216	NaN	NaN	0.71468	NaN	0.96364	NaN	0.66444	NaN	NaN
0.73803	0.90397	NaN	0.57916	0.63657	1.3146	0.38164	0.71964	NaN	NaN	0.65368	NaN	0.59381	0.55553	NaN	0.92178	0.53265	NaN	0.89523	0.62892	0.88652	NaN	0.84599	NaN	0.87013	0.87682	NaN	0.67953	0.61176	NaN	1.058	0.90667	NaN	NaN	0.7185	NaN	NaN	0.81644	NaN	0.98669	0.50865	NaN	0.78036	NaN	NaN	1.1544	NaN	NaN	NaN	0.51153
NaN	NaN	NaN	NaN	NaN	NaN	NaN	NaN	NaN	NaN	NaN	NaN	NaN	NaN	NaN	NaN	NaN	NaN	NaN	NaN	NaN	NaN	NaN	NaN	NaN	NaN	NaN	NaN	NaN	NaN	NaN	NaN	NaN	NaN	NaN	NaN	NaN	NaN	NaN	NaN	NaN	NaN	NaN	NaN	NaN	NaN	NaN	NaN	NaN	NaN
NaN	NaN	NaN	NaN	NaN	NaN	NaN	NaN	NaN	NaN	NaN	NaN	NaN	NaN	NaN	NaN	NaN	NaN	NaN	NaN	NaN	NaN	NaN	NaN	NaN	NaN	NaN	NaN	NaN	NaN	NaN	NaN	NaN	NaN	NaN	NaN	NaN	NaN	NaN	NaN	NaN	NaN	NaN	NaN	NaN	NaN	NaN	NaN	NaN	NaN
NaN	NaN	NaN	NaN	NaN	NaN	NaN	NaN	NaN	NaN	NaN	NaN	NaN	NaN	NaN	NaN	NaN	NaN	NaN	NaN	NaN	NaN	NaN	NaN	NaN	NaN	NaN	NaN	NaN	NaN	NaN	NaN	NaN	NaN	NaN	NaN	NaN	NaN	NaN	NaN	NaN	NaN	NaN	NaN	NaN	NaN	NaN	NaN	NaN	NaN
NaN	NaN	NaN	NaN	NaN	NaN	NaN	NaN	NaN	NaN	NaN	NaN	NaN	NaN	NaN	NaN	NaN	NaN	NaN	NaN	NaN	NaN	NaN	NaN	NaN	NaN	NaN	NaN	NaN	NaN	NaN	NaN	NaN	NaN	NaN	NaN	NaN	NaN	NaN	NaN	NaN	NaN	NaN	NaN	NaN	NaN	NaN	NaN	NaN	NaN
NaN	NaN	NaN	NaN	NaN	NaN	NaN	NaN	NaN	NaN	NaN	NaN	NaN	NaN	NaN	NaN	NaN	NaN	NaN	NaN	NaN	NaN	NaN	NaN	NaN	NaN	NaN	NaN	NaN	NaN	NaN	NaN	NaN	NaN	NaN	NaN	NaN	NaN	NaN	NaN	NaN	NaN	NaN	NaN	NaN	NaN	NaN	NaN	NaN	NaN
NaN	NaN	NaN	NaN	NaN	NaN	NaN	NaN	NaN	NaN	NaN	NaN	NaN	NaN	NaN	NaN	NaN	NaN	NaN	NaN	NaN	NaN	NaN	NaN	NaN	NaN	NaN	0.98675	NaN	NaN	0.75848	0.77546	NaN	NaN	NaN	NaN	0.81124	NaN	NaN	NaN	NaN	NaN	NaN	NaN	NaN	NaN	NaN	0.33291	NaN	NaN
NaN	NaN	NaN	NaN	NaN	NaN	NaN	NaN	NaN	NaN	NaN	NaN	NaN	NaN	NaN	NaN	NaN	NaN	NaN	NaN	NaN	NaN	NaN	NaN	NaN	NaN	NaN	NaN	NaN	NaN	NaN	NaN	NaN	NaN	NaN	NaN	NaN	NaN	NaN	NaN	NaN	NaN	NaN	NaN	NaN	NaN	NaN	NaN	NaN	NaN
0.98311	0.99094	0.90381	0.73644	0.72689	1.2546	0.45912	0.73883	0.91	1.736	0.67451	0.9658	0.94834	0.76722	1.0454	1.1376	0.77875	1.0534	0.9786	0.80355	0.87754	2.0776	0.82087	0.98108	0.7339	0.74017	0.93785	0.9733	0.66987	0.85578	0.93041	0.82106	1.1242	0.84778	0.70633	1.0577	0.70056	0.7146	1.1105	0.76233	0.57337	0.99297	0.66648	0.59833	0.84566	0.85069	0.76779	0.60001	1.6811	0.71131
NaN	NaN	NaN	NaN	NaN	NaN	NaN	NaN	NaN	NaN	NaN	NaN	NaN	NaN	NaN	NaN	NaN	NaN	NaN	NaN	NaN	NaN	NaN	NaN	NaN	NaN	NaN	NaN	NaN	NaN	NaN	NaN	NaN	NaN	NaN	NaN	NaN	NaN	NaN	NaN	NaN	NaN	NaN	NaN	NaN	NaN	NaN	NaN	NaN	NaN
0.9755	0.76267	1.0143	0.6626	0.76618	1.2916	0.40119	0.65197	0.85168	0.82319	0.63719	0.97563	0.69283	0.68338	1.0023	0.85151	0.64867	1.0159	0.79009	0.61899	0.84449	0.71165	0.68967	1.1566	0.78174	0.707	0.95674	0.75113	0.63616	0.94782	0.77825	0.7821	1.0257	0.82275	0.59622	1.0777	0.66044	0.73773	1.0263	0.87907	0.61817	1.1146	0.77409	0.70826	1.0854	0.93402	0.75262	0.63001	1.4277	0.64324
0.9399	0.73432	1.0265	0.68811	0.75552	1.0751	0.38512	0.6638	0.96649	0.73229	0.66231	0.85193	0.7406	0.67655	0.90686	0.82866	0.5944	0.93682	0.71511	0.55439	0.8457	0.63199	0.66799	1.0115	0.71548	0.65876	0.8019	0.76532	0.59938	0.77237	0.77389	0.76225	0.98749	0.77336	0.63384	0.94545	0.59784	0.74093	0.89866	0.74955	0.54689	0.96174	0.75168	0.59358	0.95091	0.90906	0.70159	0.62298	1.4002	0.6919
0.86899	0.87079	1.0781	0.64115	0.79744	1.0275	0.36213	0.63921	0.8397	0.66598	0.60705	0.77428	0.63231	0.6858	0.82583	0.79638	0.61921	0.92374	0.71982	0.59211	0.79552	0.6053	0.70159	0.96282	0.7244	0.77862	0.81962	0.67066	0.65692	0.74832	0.79997	0.76338	0.9118	0.74717	0.77919	1.0349	0.57773	0.72625	0.93418	0.7515	0.66338	1.0138	0.72228	0.74394	1.4352	1.1003	0.86936	0.69257	1.4553	0.75251
0.87824	0.79962	1.0282	0.60922	0.79901	1.184	0.40346	0.72196	0.78966	0.70539	0.67162	0.96498	0.68075	0.67316	0.82979	0.91294	0.73325	0.95886	0.70379	0.60978	0.75889	0.59528	0.77159	1.0215	0.76171	0.7841	1.005	0.71698	0.67257	1.0083	0.86043	0.81313	0.88691	0.81929	0.84182	0.95112	0.60647	0.82048	1.0242	0.75301	0.63485	1.2794	0.72903	0.76431	0.93004	1.0815	0.7582	0.8575	1.4733	0.76625
0.90265	0.83964	0.96608	0.65337	0.73233	1.248	0.35896	0.67351	0.88733	0.73666	0.6911	0.90379	0.65783	0.69281	0.93555	0.92339	0.61775	0.99577	0.71449	0.60021	0.95219	0.67018	0.73622	1.0651	0.78653	0.78948	0.9062	0.77466	0.61795	0.86352	0.79441	0.83684	1.0059	0.74573	0.73239	1.0672	0.67247	0.76201	0.94328	0.84523	0.57782	0.98674	0.77779	0.79035	0.95828	1.0226	0.72295	0.74709	1.3206	0.67629
1.0051	0.81591	NaN	0.72471	0.85126	NaN	0.63046	1.1607	NaN	0.91139	0.674	NaN	0.92254	0.75833	NaN	1.066	0.84885	NaN	0.80644	0.70259	NaN	0.77129	NaN	NaN	0.94902	0.8958	NaN	NaN	0.77185	NaN	0.83369	1.0188	NaN	1.0816	0.70048	NaN	0.64399	0.87181	NaN	0.88879	0.60594	NaN	0.85858	0.67991	NaN	1.3083	NaN	0.79838	1.5975	0.91499
NaN	NaN	NaN	NaN	NaN	NaN	NaN	NaN	NaN	NaN	NaN	NaN	NaN	NaN	NaN	NaN	NaN	NaN	NaN	NaN	NaN	NaN	NaN	NaN	NaN	NaN	NaN	NaN	NaN	NaN	NaN	NaN	NaN	NaN	NaN	NaN	NaN	NaN	NaN	NaN	NaN	NaN	NaN	NaN	NaN	NaN	NaN	NaN	NaN	NaN
0.88605	0.8287	1.1641	0.61885	0.80216	1.3642	0.38641	0.74773	0.98861	0.70658	0.60562	0.75744	0.65094	0.66165	0.86987	0.81238	0.67925	1.0367	0.68846	0.63875	0.84094	0.61041	0.68988	0.98507	0.76179	0.67911	0.95888	0.72499	0.6761	0.79666	0.70307	0.89163	0.86113	0.70605	0.70786	1.1108	0.67584	0.73503	1.085	0.78248	0.59291	1.1039	0.70065	0.8085	1.0163	1.2676	0.60213	0.66342	1.1952	0.75962
0.85529	1.0611	1.0945	0.68328	0.66429	1.2125	0.35333	0.70069	1.1452	0.63804	0.54027	1.0827	0.5517	0.79599	0.98151	0.75485	0.59063	0.95705	0.79876	0.69981	0.90386	1.0797	1.0777	0.89412	0.6884	0.6886	0.8972	NaN	0.56391	0.75164	0.87597	0.89671	0.95645	0.79561	0.8254	1.1496	0.77676	0.68729	1.0421	0.73863	0.53746	1.0478	0.61789	0.81879	1.0471	0.92887	NaN	0.63791	1.5263	1.1768
0.81978	0.72167	1.0271	0.62563	0.73153	1.1533	0.34268	0.57563	0.76871	0.55984	0.59204	0.72331	0.6853	0.59657	0.95792	0.80664	0.63014	1.0058	0.66594	0.56517	0.88468	0.55947	0.70528	0.97636	0.75375	0.63431	0.9219	0.71622	0.61837	0.99269	0.74545	0.76675	1.0466	0.72217	0.63857	0.95345	0.60896	0.78335	1.0599	0.76561	0.7022	1.0916	0.71719	0.76336	1.0945	1.0598	0.70574	0.64316	1.3635	0.73503
0.86401	0.8709	1.171	0.63586	0.81046	1.2424	0.46392	0.6546	0.97002	0.70902	0.66526	0.84784	0.64364	0.73528	0.88946	0.92401	0.67186	0.91293	0.76368	0.79117	0.88946	0.55023	1.2161	0.97531	0.76964	0.74136	0.73693	0.77618	0.97944	0.82628	0.85135	0.90349	0.89416	0.87763	0.61518	0.90033	0.63577	0.85236	0.88517	0.88833	0.60153	0.89036	0.8644	0.63828	0.93742	1.1209	0.7875	0.66286	1.2973	0.69173
0.8285	0.88509	0.845	0.68557	0.73586	1.2849	0.40276	0.77736	0.84516	0.71029	0.63328	0.66161	0.55975	0.66811	0.895	0.78496	0.67709	1.0965	0.75267	0.74529	0.89166	0.60512	0.82515	1.0375	0.5564	0.82023	0.85798	0.75224	0.65305	0.93711	0.72471	0.89583	1.0653	0.73922	0.62999	1.122	0.68849	0.85246	1.0282	0.84797	0.73433	1.1761	0.81186	0.74545	0.98976	1.0919	0.75192	0.78615	1.3536	0.7454
NaN	NaN	NaN	NaN	NaN	NaN	NaN	NaN	NaN	NaN	NaN	NaN	NaN	NaN	NaN	NaN	NaN	NaN	NaN	NaN	NaN	NaN	NaN	NaN	NaN	NaN	NaN	NaN	NaN	NaN	NaN	NaN	NaN	NaN	NaN	NaN	NaN	NaN	NaN	NaN	NaN	NaN	NaN	NaN	NaN	NaN	NaN	NaN	NaN	NaN
NaN	NaN	NaN	NaN	0.6678	NaN	NaN	NaN	NaN	NaN	NaN	NaN	0.73973	0.68922	NaN	NaN	0.57176	NaN	NaN	NaN	NaN	NaN	NaN	NaN	NaN	NaN	NaN	NaN	NaN	NaN	NaN	NaN	NaN	NaN	NaN	NaN	0.55513	NaN	NaN	NaN	NaN	NaN	NaN	NaN	NaN	NaN	NaN	NaN	NaN	NaN
0.82019	0.76288	NaN	0.59756	0.70131	1.185	0.35513	0.67025	0.99086	0.59001	0.65832	0.87865	0.5654	0.5186	0.749	0.86589	0.56061	1.0907	0.71405	0.63324	0.88603	0.6193	0.79429	0.99933	0.65881	0.80647	0.99795	0.64883	0.64055	0.81804	0.79909	0.81801	0.95597	0.70987	0.59282	0.68211	0.62404	0.76237	0.78856	0.76563	0.61297	1.103	0.7319	0.64032	0.98166	1.0196	0.59576	0.66174	1.1214	0.76347
0.9346	0.87121	0.8805	0.65184	0.79604	NaN	0.38248	0.62495	0.98526	0.72702	0.60372	0.72767	0.69132	0.7111	0.95036	0.88403	0.61325	0.94338	0.82458	0.52656	0.85666	0.63404	0.66773	1.0109	0.91488	0.58322	0.80879	0.80556	0.58155	0.85073	NaN	0.68418	1.0121	NaN	0.80592	1.0271	0.64452	0.73978	0.95569	0.77557	0.82745	0.97567	0.80366	0.91713	0.87621	1.2349	0.68939	0.77322	1.4419	0.93133
NaN	NaN	NaN	NaN	NaN	NaN	NaN	NaN	NaN	NaN	NaN	NaN	NaN	NaN	NaN	NaN	NaN	NaN	NaN	NaN	NaN	NaN	NaN	NaN	NaN	NaN	NaN	NaN	NaN	NaN	NaN	NaN	NaN	NaN	NaN	NaN	NaN	NaN	NaN	NaN	NaN	NaN	NaN	NaN	NaN	NaN	NaN	NaN	NaN	NaN
NaN	NaN	NaN	NaN	NaN	NaN	NaN	NaN	NaN	NaN	NaN	NaN	NaN	NaN	NaN	NaN	NaN	NaN	NaN	NaN	NaN	NaN	NaN	NaN	NaN	NaN	NaN	NaN	NaN	NaN	NaN	NaN	NaN	NaN	NaN	NaN	NaN	NaN	NaN	NaN	NaN	NaN	NaN	NaN	NaN	NaN	NaN	NaN	NaN	NaN
NaN	NaN	NaN	NaN	NaN	NaN	NaN	NaN	NaN	NaN	NaN	NaN	NaN	NaN	NaN	NaN	NaN	NaN	NaN	NaN	NaN	NaN	NaN	NaN	NaN	NaN	NaN	NaN	NaN	NaN	NaN	NaN	NaN	NaN	NaN	NaN	NaN	NaN	NaN	NaN	NaN	NaN	NaN	NaN	NaN	NaN	NaN	NaN	NaN	NaN
0.81738	0.73434	NaN	0.86538	0.73169	0.7663	NaN	NaN	NaN	0.74645	0.92712	0.90205	0.70591	0.8733	NaN	0.90579	0.82554	NaN	0.69099	NaN	0.62968	0.73838	0.7065	1.1937	0.79223	0.68429	NaN	0.62984	0.57888	NaN	0.90312	NaN	NaN	0.78385	NaN	NaN	NaN	NaN	0.71198	0.87101	NaN	NaN	NaN	NaN	NaN	NaN	NaN	NaN	NaN	0.49599
0.72964	0.745	1.1415	0.53458	0.81316	NaN	0.57181	0.63335	0.8339	0.60282	NaN	1.0743	0.86937	0.78631	0.92251	0.67064	0.74891	NaN	0.56589	0.67141	NaN	0.54056	0.80625	0.9017	0.60804	1.0508	0.80859	0.5777	1.1092	NaN	0.83282	0.75124	NaN	0.61939	0.80852	1.0005	0.68362	0.90191	0.92775	0.7428	0.59444	1.0999	0.67624	0.74535	0.92527	0.87965	0.71295	0.85682	NaN	0.62709
0.81575	0.70521	1.1159	0.55446	0.70969	1.0557	0.35086	0.61859	0.82626	0.69314	0.59433	0.84507	0.5955	0.60913	0.94294	0.78555	0.59348	0.99207	0.64643	0.55006	0.72383	0.59362	0.63218	0.99021	0.62003	0.6219	0.97072	0.64646	0.58457	0.84711	0.76724	0.7398	0.95758	0.66906	0.62151	1.1228	0.61936	0.7426	1.091	0.73453	0.57447	1.1595	0.6926	0.75081	0.86833	0.95319	0.7478	0.69363	1.3622	0.70659
0.98899	0.84907	NaN	0.80262	NaN	NaN	NaN	NaN	0.98164	NaN	0.48104	NaN	0.48293	NaN	NaN	NaN	NaN	0.94218	NaN	NaN	NaN	NaN	NaN	0.91431	NaN	0.4081	NaN	NaN	NaN	NaN	NaN	NaN	NaN	0.90273	NaN	NaN	0.85951	0.50203	1.0692	0.77537	NaN	NaN	0.71359	NaN	NaN	NaN	NaN	0.47142	NaN	NaN
0.85774	0.668	1.0401	0.65298	0.66777	1.3469	0.38956	0.55722	0.8257	0.63493	0.57721	0.9392	0.61924	0.64685	0.86409	0.78776	0.53292	0.78015	0.58844	0.49358	0.98279	0.60139	0.6116	1.0486	0.76659	0.68157	0.80579	0.79533	0.53834	0.81731	0.78256	0.65854	0.8748	0.84716	0.55307	0.87418	0.59075	0.65985	1.0108	0.83784	0.5439	0.98677	0.79726	0.57703	1.0135	1.0421	0.72113	0.62909	1.2748	0.63997
NaN	NaN	NaN	NaN	NaN	NaN	NaN	NaN	NaN	NaN	NaN	NaN	NaN	NaN	NaN	NaN	NaN	NaN	NaN	NaN	NaN	NaN	NaN	NaN	NaN	NaN	NaN	NaN	NaN	NaN	NaN	NaN	NaN	NaN	NaN	NaN	NaN	NaN	NaN	NaN	NaN	NaN	NaN	NaN	NaN	NaN	NaN	NaN	NaN	NaN
NaN	NaN	0.48775	NaN	NaN	NaN	NaN	NaN	NaN	NaN	NaN	NaN	NaN	NaN	NaN	NaN	NaN	NaN	NaN	NaN	NaN	NaN	NaN	NaN	NaN	NaN	NaN	NaN	NaN	NaN	NaN	NaN	NaN	1.5849	NaN	NaN	NaN	NaN	NaN	NaN	NaN	NaN	NaN	NaN	NaN	NaN	NaN	NaN	NaN	NaN
NaN	NaN	NaN	NaN	NaN	NaN	NaN	NaN	NaN	NaN	NaN	NaN	NaN	NaN	NaN	NaN	NaN	NaN	NaN	0.61677	NaN	NaN	0.70312	NaN	NaN	NaN	NaN	NaN	NaN	NaN	NaN	NaN	NaN	NaN	NaN	NaN	NaN	NaN	NaN	NaN	0.88075	NaN	NaN	NaN	0.67364	NaN	NaN	NaN	NaN	NaN
NaN	0.67343	NaN	0.85648	NaN	NaN	NaN	NaN	NaN	NaN	NaN	0.65183	0.78033	NaN	NaN	1.0343	NaN	NaN	1.0709	NaN	NaN	0.98878	NaN	NaN	0.95151	NaN	NaN	0.78102	NaN	NaN	0.76143	NaN	NaN	0.86301	NaN	NaN	0.84307	NaN	NaN	NaN	NaN	NaN	NaN	NaN	NaN	NaN	NaN	NaN	0.85553	NaN
NaN	NaN	NaN	NaN	NaN	NaN	NaN	NaN	NaN	NaN	NaN	NaN	NaN	NaN	NaN	NaN	NaN	NaN	NaN	NaN	NaN	NaN	NaN	NaN	NaN	NaN	NaN	NaN	NaN	NaN	NaN	NaN	NaN	NaN	NaN	NaN	NaN	NaN	NaN	NaN	NaN	NaN	NaN	NaN	NaN	NaN	NaN	NaN	NaN	NaN
0.84926	0.80725	1.0364	0.78873	0.40297	1.3566	0.22025	0.30875	0.91407	1.5218	0.42459	0.7773	0.45932	0.36536	0.91422	0.70949	0.35413	0.93601	0.5261	0.83749	0.74879	2.0328	0.38504	0.9316	0.35572	NaN	0.68539	0.64447	0.34685	0.62643	0.65629	0.484	0.85679	0.89694	0.43513	0.98559	1.1163	0.43425	1.0351	0.64888	NaN	0.99795	0.68738	0.46376	0.76601	0.65702	0.67978	0.43021	1.0608	0.49646
0.8845	0.65745	0.982	0.63299	0.37884	0.98789	0.26757	0.39282	0.73554	0.89726	0.53733	0.97732	0.51006	0.41726	0.7621	0.73712	0.3851	0.76018	0.59652	0.61386	0.75909	0.87837	0.44085	0.87372	0.48983	0.384	0.7431	0.59163	0.36701	0.63768	0.54268	0.48737	0.80383	0.7198	NaN	0.81955	0.66972	0.44075	0.79446	0.66346	0.44	0.85903	0.64084	0.4966	0.75397	0.64417	0.58225	0.50451	1.1003	0.50496
0.83464	0.99557	0.93769	0.72615	NaN	1.0794	0.27244	NaN	0.83677	1.368	0.55868	0.91068	0.47689	NaN	0.76953	0.74386	0.46141	0.81444	0.57855	0.76421	0.73874	1.5416	NaN	0.8594	0.50372	0.43993	0.74927	0.67636	NaN	0.70922	0.65897	NaN	0.84936	0.83131	NaN	0.86463	1.0154	NaN	0.89815	0.69876	NaN	0.89358	0.68578	NaN	0.75447	0.61577	0.66257	NaN	1.1829	NaN
NaN	NaN	NaN	NaN	NaN	NaN	NaN	NaN	NaN	NaN	NaN	NaN	NaN	NaN	NaN	NaN	NaN	NaN	NaN	NaN	NaN	NaN	NaN	NaN	NaN	NaN	NaN	NaN	NaN	NaN	NaN	NaN	NaN	NaN	NaN	NaN	NaN	NaN	NaN	NaN	NaN	NaN	NaN	NaN	NaN	NaN	NaN	NaN	NaN	NaN
0.95864	0.9113	1.0242	0.74198	1.0642	1.1915	0.41182	0.9549	0.93579	0.77156	0.73244	0.94693	0.63904	0.72142	0.88568	0.81944	0.66074	0.96657	0.78237	0.63531	0.85142	0.57241	0.79469	1.0515	0.7348	0.79231	0.86781	0.7969	0.61749	0.78342	0.71127	0.8421	1.0533	0.71329	0.77739	0.94601	0.71433	0.70442	0.86143	0.86409	0.93179	0.86972	0.75074	1.0779	0.99734	1.3503	0.7119	0.91731	1.4146	1.0267
0.88312	NaN	1.056	0.75142	NaN	1.0805	NaN	NaN	0.97886	1.6794	NaN	0.86391	0.39846	NaN	0.68556	0.59355	NaN	0.83859	0.53486	0.89507	0.78219	2.2815	0.27584	1.0498	NaN	NaN	0.62078	0.55767	NaN	0.61721	0.54825	NaN	0.92516	0.8825	0.31803	0.80701	1.0574	NaN	0.90214	0.51665	NaN	1.1487	0.56265	NaN	0.78596	NaN	0.69987	NaN	1.1457	NaN
0.75461	0.76937	0.80776	NaN	0.34392	1.0786	NaN	0.25481	0.81862	1.6316	0.34922	1.0183	NaN	0.29391	0.92146	0.84626	0.34916	0.87984	NaN	0.7129	NaN	1.5952	NaN	1.0857	NaN	NaN	0.78625	NaN	0.26556	0.83446	0.84401	0.38046	1.0912	NaN	NaN	0.94657	0.90106	0.38664	0.81	0.52904	0.42379	0.94879	NaN	0.40964	0.88418	NaN	0.6192	0.34309	1.3334	0.49135
NaN	NaN	NaN	NaN	NaN	NaN	NaN	NaN	NaN	NaN	NaN	NaN	NaN	NaN	NaN	NaN	NaN	NaN	NaN	NaN	NaN	NaN	NaN	NaN	NaN	NaN	NaN	NaN	NaN	NaN	NaN	NaN	NaN	NaN	NaN	NaN	NaN	NaN	NaN	NaN	NaN	NaN	NaN	NaN	NaN	NaN	NaN	NaN	NaN	NaN
NaN	NaN	NaN	NaN	NaN	NaN	NaN	NaN	NaN	NaN	NaN	NaN	NaN	NaN	NaN	NaN	NaN	NaN	NaN	NaN	NaN	NaN	NaN	NaN	NaN	NaN	NaN	NaN	NaN	NaN	NaN	NaN	NaN	NaN	NaN	NaN	NaN	NaN	NaN	NaN	NaN	NaN	NaN	NaN	NaN	NaN	NaN	NaN	NaN	NaN
NaN	NaN	1.0446	NaN	NaN	0.91447	NaN	NaN	1.1436	NaN	NaN	0.69001	NaN	NaN	0.80785	NaN	NaN	0.72222	NaN	NaN	0.72515	NaN	NaN	0.85901	NaN	NaN	0.71034	NaN	NaN	0.76483	NaN	NaN	0.8436	NaN	NaN	0.78499	NaN	NaN	0.85463	NaN	NaN	NaN	NaN	NaN	0.78586	NaN	0.68786	NaN	1.2496	NaN
NaN	NaN	NaN	NaN	NaN	NaN	NaN	NaN	NaN	NaN	NaN	NaN	NaN	NaN	0.92365	NaN	NaN	NaN	NaN	NaN	NaN	NaN	NaN	NaN	NaN	NaN	NaN	NaN	NaN	NaN	NaN	NaN	NaN	NaN	NaN	NaN	NaN	NaN	NaN	NaN	NaN	NaN	NaN	NaN	NaN	NaN	NaN	NaN	NaN	NaN
NaN	NaN	NaN	NaN	NaN	NaN	NaN	NaN	NaN	NaN	NaN	NaN	NaN	NaN	NaN	NaN	NaN	NaN	NaN	NaN	NaN	NaN	NaN	NaN	NaN	NaN	NaN	NaN	NaN	NaN	NaN	NaN	NaN	NaN	NaN	NaN	NaN	NaN	NaN	NaN	NaN	NaN	NaN	NaN	NaN	NaN	NaN	NaN	NaN	NaN
NaN	0.5808	NaN	NaN	0.72573	NaN	NaN	0.78741	0.80062	NaN	0.71988	NaN	NaN	0.59841	NaN	0.77716	0.5973	NaN	0.66794	NaN	NaN	NaN	0.60222	NaN	NaN	0.67626	NaN	0.65544	NaN	NaN	0.66396	NaN	NaN	NaN	NaN	NaN	0.64718	0.70543	NaN	0.84623	0.65403	NaN	NaN	0.54265	1.0016	NaN	0.72513	NaN	NaN	0.59094
0.82502	0.85082	1.0123	0.67832	0.51096	1.0203	0.27303	0.54476	0.88358	1.3192	0.44313	0.83799	0.37472	0.55035	0.88637	0.74394	0.4434	0.8949	0.63275	0.61207	0.76326	1.6035	0.55678	1.0261	0.54049	0.43937	0.79217	0.66593	0.38697	0.7423	0.7745	0.52273	0.91262	0.83511	NaN	0.96935	0.86657	0.48448	0.91377	0.67381	0.39773	1.0767	0.63055	0.48611	0.80574	0.64984	0.67055	0.53318	1.2821	0.5887
NaN	NaN	NaN	NaN	NaN	NaN	NaN	NaN	NaN	NaN	NaN	NaN	NaN	NaN	NaN	NaN	NaN	NaN	NaN	NaN	NaN	NaN	NaN	NaN	NaN	NaN	NaN	NaN	NaN	NaN	NaN	NaN	NaN	NaN	NaN	NaN	NaN	NaN	NaN	NaN	NaN	NaN	NaN	NaN	NaN	NaN	NaN	NaN	NaN	NaN
0.9774	0.66552	1.0197	0.8746	0.72737	1.0197	0.55745	0.70442	0.84116	0.86206	0.76455	0.77823	0.78986	0.71432	0.8643	1.1007	0.61441	0.87049	0.9543	0.6202	0.77207	0.71725	0.78588	NaN	0.96754	0.62176	NaN	0.79369	0.6982	NaN	0.78621	0.69058	1.0481	0.91429	0.48439	0.71475	0.86642	NaN	0.76456	0.83661	0.53867	0.84803	0.91972	0.67404	0.83045	NaN	NaN	NaN	1.1266	NaN
NaN	0.76858	NaN	NaN	NaN	NaN	NaN	NaN	NaN	0.7313	NaN	NaN	NaN	0.9477	NaN	0.87529	NaN	NaN	NaN	NaN	NaN	0.70143	0.76586	NaN	NaN	0.67486	NaN	NaN	0.74818	NaN	0.68063	NaN	NaN	1.0198	NaN	NaN	NaN	0.77174	NaN	NaN	NaN	NaN	NaN	NaN	NaN	NaN	NaN	NaN	NaN	NaN
0.88643	0.75672	0.96009	0.69585	0.62091	1.0943	0.31137	0.51422	0.86212	0.91249	0.62986	0.78629	0.53985	0.55095	0.87194	0.79934	0.56791	0.86206	0.66923	0.65712	0.78747	1.0316	0.58638	0.91705	0.63998	0.55834	0.71713	0.65538	0.58621	0.70977	0.68886	0.64818	0.86888	0.82262	0.55607	0.85677	0.81499	0.54144	0.86682	0.74815	0.59507	0.88823	0.71439	0.69441	0.82876	0.89246	0.62609	0.61167	1.177	0.65051
0.90134	0.77021	1.1902	0.62976	0.61064	1.0765	0.43645	0.53452	0.93081	0.65636	0.79764	0.85903	0.69291	0.75098	NaN	0.75918	0.86166	0.97663	0.85338	0.66771	1.2536	0.59925	0.86589	NaN	0.80272	0.85743	NaN	0.68721	0.73694	0.89249	0.764	1.0453	NaN	0.71892	0.52015	NaN	0.81402	0.90418	NaN	0.81152	0.46594	NaN	0.79499	0.59998	NaN	1.0669	0.82049	NaN	NaN	0.42181
1.0308	NaN	1.0371	0.61035	NaN	NaN	0.46194	NaN	NaN	0.74847	0.66275	NaN	0.81083	NaN	NaN	0.86033	NaN	NaN	0.78286	NaN	NaN	0.67221	0.71429	NaN	0.89021	0.7999	NaN	NaN	NaN	NaN	0.86718	NaN	NaN	0.77521	NaN	NaN	0.68517	0.8221	NaN	0.91332	0.72619	NaN	NaN	NaN	NaN	NaN	0.78544	NaN	NaN	NaN
0.96334	NaN	NaN	0.80864	NaN	NaN	0.43576	NaN	NaN	0.75138	NaN	NaN	0.65372	NaN	NaN	0.95866	NaN	NaN	0.59604	NaN	NaN	0.70458	NaN	NaN	0.59427	NaN	NaN	0.84047	NaN	NaN	0.67667	NaN	NaN	0.72199	NaN	NaN	NaN	NaN	NaN	0.78004	NaN	NaN	0.60159	NaN	NaN	NaN	NaN	NaN	NaN	1.6865
NaN	NaN	NaN	NaN	NaN	NaN	NaN	NaN	NaN	NaN	NaN	NaN	NaN	NaN	NaN	NaN	NaN	NaN	NaN	NaN	NaN	NaN	NaN	NaN	NaN	NaN	NaN	NaN	NaN	NaN	NaN	NaN	NaN	NaN	NaN	NaN	NaN	NaN	NaN	0.68565	NaN	NaN	NaN	NaN	NaN	NaN	NaN	NaN	NaN	NaN
NaN	NaN	NaN	NaN	NaN	NaN	NaN	NaN	NaN	NaN	NaN	NaN	NaN	NaN	NaN	NaN	NaN	NaN	NaN	NaN	NaN	NaN	NaN	NaN	NaN	NaN	NaN	NaN	NaN	NaN	NaN	NaN	NaN	NaN	NaN	NaN	NaN	NaN	NaN	NaN	NaN	NaN	NaN	NaN	NaN	NaN	NaN	NaN	NaN	NaN
0.93865	0.82717	1.0914	0.61821	0.78989	1.0925	0.38002	0.72383	0.94995	0.66064	0.70265	0.80552	0.67963	0.67883	NaN	0.81319	0.63319	0.99604	0.74077	0.6243	0.77393	0.52601	0.73842	1.2081	0.67098	0.73258	0.95478	0.70276	0.68081	0.97978	0.6788	0.8006	0.9514	0.7925	0.72591	NaN	0.57097	0.8187	1.0523	0.8459	0.59215	1.3363	0.79255	0.91403	0.90119	1.1301	0.68057	0.70471	1.2102	0.77918
0.69785	0.81411	1.0852	0.58795	0.81871	1.0707	0.33506	0.79748	0.95353	0.75748	0.58884	0.92518	0.74058	0.65232	0.93657	0.74908	0.78056	0.99753	0.81664	0.6529	0.90727	0.52477	0.88996	1.0207	0.62731	0.72773	0.76818	0.6411	0.6729	0.86772	0.679	0.68346	0.9591	0.67662	0.71779	0.9147	0.53207	0.80205	0.87069	0.71888	0.71361	1.1141	0.72395	0.78007	1.0361	1.1108	0.6758	0.80056	1.4091	0.89251
NaN	0.75719	1.0174	0.74117	NaN	1.2591	NaN	NaN	0.61261	1.5017	NaN	0.9184	0.49423	NaN	0.809	0.79689	NaN	1.0119	0.64587	0.60143	0.80467	1.9412	0.47187	0.96228	NaN	NaN	0.97367	0.77311	NaN	0.80372	NaN	NaN	0.94003	0.90217	NaN	1.0479	NaN	NaN	1.0155	NaN	NaN	1.0844	0.87869	NaN	0.74699	NaN	0.74216	NaN	1.2403	NaN
NaN	0.53222	1.2779	NaN	NaN	NaN	NaN	NaN	NaN	NaN	NaN	NaN	NaN	NaN	0.83865	NaN	NaN	0.82029	NaN	NaN	NaN	NaN	NaN	0.93127	NaN	NaN	NaN	NaN	NaN	0.80271	0.62634	NaN	1.0037	0.60086	NaN	0.91124	NaN	NaN	NaN	0.68542	NaN	NaN	0.73032	NaN	0.88428	NaN	NaN	NaN	NaN	NaN
NaN	NaN	NaN	NaN	NaN	NaN	NaN	NaN	NaN	NaN	NaN	0.59025	NaN	NaN	0.89633	NaN	NaN	0.96508	NaN	NaN	NaN	NaN	NaN	1.0155	NaN	NaN	0.58586	NaN	NaN	NaN	NaN	NaN	0.93265	NaN	NaN	NaN	NaN	NaN	0.99499	NaN	NaN	0.95594	NaN	NaN	0.85197	NaN	NaN	NaN	1.4078	NaN
NaN	NaN	NaN	NaN	NaN	NaN	NaN	NaN	NaN	NaN	NaN	NaN	NaN	NaN	NaN	NaN	NaN	NaN	NaN	NaN	NaN	NaN	NaN	NaN	NaN	NaN	NaN	NaN	NaN	NaN	NaN	NaN	NaN	NaN	NaN	NaN	NaN	NaN	NaN	NaN	NaN	NaN	NaN	NaN	NaN	NaN	NaN	NaN	NaN	NaN
NaN	NaN	NaN	NaN	NaN	NaN	NaN	NaN	NaN	NaN	NaN	NaN	NaN	NaN	NaN	NaN	NaN	NaN	NaN	NaN	NaN	NaN	NaN	NaN	NaN	NaN	NaN	NaN	NaN	NaN	NaN	NaN	NaN	NaN	NaN	NaN	NaN	NaN	NaN	NaN	NaN	NaN	NaN	NaN	NaN	NaN	NaN	NaN	NaN	NaN
NaN	NaN	NaN	NaN	NaN	NaN	NaN	NaN	NaN	NaN	NaN	NaN	NaN	NaN	NaN	0.97732	NaN	NaN	NaN	NaN	NaN	NaN	NaN	NaN	NaN	NaN	NaN	NaN	NaN	NaN	0.80441	NaN	NaN	NaN	NaN	NaN	NaN	NaN	NaN	NaN	NaN	NaN	0.8144	NaN	NaN	NaN	NaN	NaN	NaN	NaN
0.76641	1.8475	NaN	NaN	NaN	NaN	0.57072	NaN	NaN	0.75539	NaN	NaN	0.78243	0.77884	NaN	1.0743	NaN	NaN	0.72072	NaN	NaN	NaN	0.86303	NaN	0.99729	NaN	NaN	0.91362	0.78899	NaN	1.0349	NaN	NaN	0.80102	0.77955	NaN	0.64045	NaN	NaN	0.93368	NaN	NaN	1.0184	0.76768	NaN	1.1381	NaN	0.87323	NaN	1.0186
0.86014	0.95925	0.99265	0.59825	0.88299	0.82235	0.30363	0.81499	1.6554	0.8183	0.83917	0.86199	0.5725	0.84636	0.9406	0.9487	0.8368	0.57229	0.70074	0.84136	0.71876	0.51431	0.75671	NaN	0.88166	0.94186	NaN	0.65078	0.83913	NaN	0.96051	1.0251	0.61066	0.9271	0.75229	0.3808	0.62885	0.94492	NaN	0.71701	0.89295	NaN	0.73832	0.8238	0.69086	1.4834	NaN	0.81712	NaN	0.97551
0.57676	0.83854	0.95447	0.80268	0.789	1.0151	0.44058	0.73691	0.91004	0.82939	0.76639	0.80744	0.80499	0.74384	0.96135	0.79821	0.68954	0.8276	0.93196	0.85352	0.85677	0.73827	0.79026	0.77625	0.89118	0.85284	0.75298	0.87435	0.60438	0.69648	0.7708	0.78517	0.84986	0.81943	0.72861	1.2236	0.70225	0.86888	0.89873	0.82372	0.80777	0.96166	0.7838	0.89285	0.84031	1.0502	0.76444	0.94451	1.1739	0.82869
0.78981	NaN	1.0473	0.64623	NaN	NaN	0.3772	NaN	NaN	0.82273	NaN	0.6953	0.70261	NaN	NaN	NaN	NaN	NaN	0.87993	NaN	NaN	0.65484	0.48106	1.229	0.75422	NaN	NaN	0.63066	NaN	0.91095	0.72434	0.90586	NaN	0.61528	NaN	NaN	0.47597	NaN	NaN	0.75776	NaN	0.75795	0.53686	NaN	NaN	NaN	NaN	NaN	1.3931	NaN
NaN	NaN	NaN	NaN	NaN	NaN	NaN	NaN	NaN	NaN	NaN	NaN	NaN	NaN	NaN	NaN	NaN	NaN	NaN	NaN	NaN	NaN	NaN	NaN	NaN	NaN	NaN	NaN	NaN	NaN	NaN	NaN	NaN	NaN	NaN	NaN	NaN	NaN	NaN	NaN	NaN	NaN	NaN	NaN	NaN	NaN	NaN	NaN	NaN	NaN
0.90869	0.84882	1.0698	0.6889	0.76738	1.0511	0.39477	0.76975	0.87008	0.61431	0.7074	0.7973	0.6437	0.83279	1.0425	0.89367	0.68015	0.99794	0.74958	0.6226	0.83504	0.59803	0.62675	1.0832	0.76964	0.71906	1.0078	0.74249	0.63019	0.89958	0.77844	0.85219	1.0179	0.73868	0.74113	1.1185	0.68236	0.76706	0.91294	0.90141	0.72884	1.0939	0.79282	0.88997	1.1414	1.1373	0.68853	0.80694	1.4234	0.82725
NaN	NaN	NaN	NaN	NaN	NaN	NaN	NaN	NaN	NaN	NaN	NaN	NaN	NaN	NaN	NaN	NaN	NaN	NaN	NaN	NaN	NaN	NaN	NaN	NaN	NaN	NaN	NaN	NaN	NaN	NaN	NaN	NaN	NaN	NaN	NaN	NaN	NaN	NaN	NaN	NaN	NaN	NaN	NaN	NaN	NaN	NaN	NaN	NaN	NaN
NaN	NaN	NaN	0.54741	0.079895	NaN	NaN	NaN	NaN	0.57841	NaN	NaN	0.56318	NaN	NaN	NaN	NaN	NaN	NaN	0.47085	NaN	NaN	NaN	NaN	NaN	NaN	NaN	NaN	NaN	NaN	NaN	0.67364	NaN	NaN	0.9562	NaN	0.44923	NaN	NaN	NaN	1.1989	NaN	NaN	NaN	NaN	1.0843	NaN	0.74222	NaN	0.64894
NaN	NaN	NaN	NaN	NaN	NaN	NaN	NaN	NaN	NaN	NaN	NaN	NaN	NaN	NaN	NaN	NaN	NaN	NaN	NaN	NaN	NaN	NaN	NaN	NaN	NaN	NaN	NaN	NaN	NaN	NaN	NaN	NaN	NaN	NaN	NaN	0.26775	NaN	NaN	0.47047	NaN	NaN	NaN	NaN	NaN	NaN	NaN	NaN	NaN	0.51747
1.0875	0.77144	0.98235	0.56397	0.70288	1.0833	0.27479	0.52202	0.99497	0.7692	0.71696	0.84219	0.80323	0.72079	0.83941	0.82159	0.78253	0.80916	0.61929	0.44256	0.9119	0.82696	0.66229	0.79999	0.74154	0.74503	0.79307	0.80521	0.57139	0.71036	0.85217	0.68205	0.901	0.93117	0.89738	0.94076	0.81408	0.67975	0.7312	0.74397	0.50165	0.79758	0.70319	0.76269	0.74182	0.87303	0.61087	0.52441	1.2013	0.51937
NaN	NaN	NaN	NaN	NaN	NaN	NaN	NaN	NaN	NaN	NaN	NaN	NaN	NaN	NaN	NaN	NaN	NaN	NaN	NaN	NaN	NaN	NaN	NaN	NaN	NaN	NaN	NaN	NaN	NaN	NaN	NaN	NaN	NaN	NaN	NaN	NaN	NaN	0.97721	NaN	NaN	NaN	NaN	NaN	NaN	NaN	NaN	NaN	NaN	NaN
0.92908	0.85805	0.90752	0.78551	0.64595	0.95342	0.37108	0.63204	1.0334	0.83964	0.74733	0.72246	0.65104	0.71155	0.91723	0.93492	0.72014	0.99579	0.85756	0.6579	0.88198	0.75905	0.7319	0.8815	0.78657	0.7354	0.76704	0.8412	0.65665	0.88679	0.7555	0.78887	0.79307	0.79194	0.72729	0.82586	0.71865	0.74452	0.94296	0.91365	0.76563	1.1138	0.85028	0.8945	0.98704	1.0062	0.67564	0.83604	1.3237	0.91322
NaN	NaN	NaN	NaN	NaN	1.1056	NaN	NaN	NaN	NaN	NaN	NaN	NaN	NaN	NaN	0.84141	NaN	NaN	NaN	NaN	NaN	NaN	NaN	NaN	NaN	NaN	NaN	NaN	NaN	0.81794	NaN	NaN	NaN	NaN	NaN	NaN	NaN	NaN	NaN	NaN	NaN	NaN	NaN	NaN	0.88503	NaN	NaN	NaN	1.0999	NaN
0.92364	0.77508	1.0185	0.6474	0.70936	1.1348	0.32998	0.62247	0.75113	0.84912	0.75092	1.0157	0.6034	0.66157	0.79355	0.8415	0.58553	0.9449	0.69665	0.62345	0.80821	0.81479	0.62998	0.94985	0.75544	0.61746	0.87218	0.63757	0.63488	0.71099	0.74764	0.70381	0.86698	0.82023	0.51768	0.83977	0.85034	0.60688	0.88594	0.80298	0.49291	0.99437	0.76858	0.6212	0.76909	0.84408	0.60182	0.53411	1.1606	0.66509
0.87868	0.77184	0.96019	0.6822	0.72374	1.0226	0.36217	0.64481	0.93559	0.79221	0.5678	0.70896	0.65795	0.67255	0.85861	0.83121	0.61913	0.9771	0.7681	0.60048	0.83085	0.69476	0.67098	1.0021	0.72372	0.71557	0.69433	0.75229	0.56422	0.75602	0.7441	0.78665	0.87474	0.7615	0.59078	0.99042	0.61039	0.74541	0.85729	0.7774	0.65165	0.9512	0.75579	0.64616	0.88153	0.92258	0.70326	0.67517	1.1996	0.67771
0.96377	0.78201	1.0209	0.62106	0.75505	1.1022	0.39022	0.70559	0.99781	0.74856	0.65456	0.76748	0.62368	0.63151	0.86287	0.8854	0.65169	0.9091	0.75522	0.61692	0.85808	0.69465	0.66728	0.96294	0.799	0.71678	0.86008	0.74286	0.63852	0.78666	0.90564	0.75459	0.93027	0.89373	0.67684	0.96688	0.71751	0.79078	0.92175	0.87258	0.57569	1.0496	0.80143	0.74736	0.91769	1.0318	0.74539	0.75493	1.2852	0.66151
0.82115	NaN	NaN	NaN	NaN	NaN	NaN	NaN	NaN	0.66412	NaN	NaN	0.63096	1.1022	NaN	0.78829	NaN	NaN	0.67931	NaN	NaN	0.6238	0.47273	NaN	0.62751	1.0031	NaN	0.72847	NaN	NaN	1.0324	0.85514	NaN	0.81536	0.85609	NaN	0.61076	NaN	NaN	0.8704	0.77285	NaN	0.80828	NaN	NaN	NaN	NaN	1.2191	NaN	1.0602
0.88355	NaN	NaN	0.63268	0.73043	NaN	0.33606	NaN	NaN	0.75736	NaN	NaN	0.63128	0.54012	NaN	0.73659	NaN	NaN	0.59623	0.95836	NaN	0.54728	1.0017	NaN	0.65456	1.1044	NaN	0.6214	NaN	1.0116	0.72038	NaN	NaN	0.81492	1.2628	NaN	0.56936	NaN	NaN	0.82159	NaN	NaN	0.77545	0.72517	NaN	2.0621	NaN	1.5571	NaN	1.2422
NaN	NaN	NaN	NaN	NaN	NaN	NaN	NaN	NaN	NaN	NaN	NaN	NaN	NaN	NaN	NaN	NaN	NaN	NaN	NaN	NaN	NaN	NaN	NaN	NaN	NaN	NaN	NaN	NaN	NaN	NaN	NaN	NaN	NaN	NaN	1.0352	NaN	NaN	NaN	NaN	NaN	1.3701	NaN	NaN	NaN	0.84815	NaN	0.5516	NaN	NaN
0.94195	0.92732	NaN	0.70228	0.68091	NaN	0.42773	0.73234	0.96957	0.74264	0.58496	0.92015	0.67676	0.80011	0.94082	0.92387	0.66613	1.1825	0.76706	0.5414	NaN	0.70357	0.71696	0.85257	0.80642	0.7546	0.71492	0.77606	0.6491	0.78864	0.78732	0.69402	0.86546	0.83564	0.58854	0.94152	0.82144	0.65637	0.92998	0.96777	0.53052	1.0426	0.83786	0.78599	0.80513	0.99715	0.56619	0.7396	1.1421	0.69697
0.86369	0.82888	0.93191	0.65187	0.64437	1.1173	0.39548	0.72209	0.8586	0.72481	0.59671	0.78701	0.58362	0.69299	0.82139	0.87154	0.61887	1.0037	0.76582	0.50205	0.88943	0.73871	0.70772	1.0307	0.7133	0.67211	0.9243	0.6985	0.78421	0.8212	0.71539	0.71893	1.0781	0.68696	0.66351	1.1681	0.57258	0.67015	1.0204	0.79407	0.62954	1.1528	0.72645	0.60707	0.94166	1.0211	1.0081	0.61082	1.3984	0.64695
0.94015	0.97254	0.9764	0.74777	0.79891	1.2398	0.38081	0.76949	0.8145	0.76523	0.75505	1.0938	0.77898	0.80281	1.0318	0.83552	0.67234	1.0752	0.7538	0.7434	1.164	0.58399	0.7388	1.2309	0.76863	0.78194	1.0182	0.71427	0.70487	0.90389	0.76472	0.98853	0.97134	0.83382	0.76521	1.2062	0.61243	0.88341	1.4459	0.79782	0.7106	1.2318	0.72952	0.82877	1.0109	1.1229	0.83718	0.73982	1.552	0.76874
NaN	NaN	0.94457	NaN	NaN	NaN	NaN	NaN	0.8563	NaN	NaN	1.3099	NaN	NaN	1.093	NaN	NaN	1.1905	NaN	NaN	NaN	NaN	NaN	0.92259	NaN	NaN	1.0854	NaN	NaN	1.0823	NaN	NaN	0.85673	NaN	NaN	1.1172	NaN	NaN	1.061	NaN	NaN	1.2762	NaN	NaN	1.3472	NaN	0.92753	NaN	1.2518	NaN
0.91276	0.78885	0.93125	0.76252	0.92813	1.0525	0.53197	0.79753	1.1786	0.73712	0.62869	0.97412	0.73366	0.71758	1.0409	0.99346	0.7469	0.98537	0.9444	0.68764	0.9263	0.78051	0.75201	1.0885	0.8943	0.78953	0.74295	0.84372	0.64023	0.75403	0.90483	0.8597	0.94491	0.88839	0.81508	1.1206	0.66797	0.75751	0.92934	1.0205	0.74121	1.1083	0.87134	0.93043	1.0249	1.1881	0.74638	0.97093	1.4099	0.86842
NaN	NaN	NaN	NaN	NaN	NaN	NaN	NaN	NaN	NaN	NaN	NaN	NaN	NaN	NaN	NaN	0.62904	NaN	NaN	0.71384	NaN	NaN	NaN	NaN	NaN	NaN	NaN	NaN	0.66914	NaN	NaN	NaN	NaN	NaN	NaN	NaN	NaN	0.88454	NaN	NaN	NaN	NaN	NaN	0.68792	NaN	NaN	NaN	NaN	NaN	NaN
NaN	NaN	NaN	NaN	NaN	NaN	NaN	NaN	NaN	NaN	NaN	NaN	NaN	NaN	0.98285	NaN	0.85531	NaN	NaN	NaN	NaN	NaN	NaN	NaN	NaN	NaN	NaN	NaN	NaN	NaN	NaN	NaN	NaN	0.8944	NaN	NaN	NaN	NaN	NaN	NaN	NaN	NaN	NaN	NaN	NaN	NaN	NaN	NaN	1.1684	NaN
0.90216	0.96619	0.94231	0.69086	0.84176	0.96358	0.38049	0.95818	0.91869	0.68348	0.89922	0.66974	0.68169	0.85657	0.99255	0.83169	0.6573	0.76826	0.8568	0.67349	0.82219	0.63978	0.87554	0.92667	0.7842	0.91212	0.50735	0.72284	0.70816	0.81199	0.82491	0.85491	0.87125	0.74313	1.1243	0.92564	0.63124	1.1352	0.79584	0.78703	1.0769	0.89972	0.8208	1.2541	0.96733	1.4192	0.64038	1.3152	1.3362	1.1247
0.91516	NaN	NaN	0.82958	0.69601	NaN	0.49375	NaN	1.0452	0.96053	0.7697	1.0456	0.94145	0.71267	0.97602	0.8519	NaN	1.2157	0.64415	0.91862	NaN	0.63938	0.65486	NaN	0.88864	NaN	NaN	0.64658	NaN	0.81396	0.87991	0.90446	0.92659	0.6857	0.91599	NaN	0.55672	1.1397	0.88865	0.88209	0.85154	1.1613	0.77698	1.4711	NaN	NaN	NaN	0.93471	NaN	0.83638
0.86802	0.72198	0.95359	0.57972	0.76876	1.0882	0.30282	0.57734	0.73773	0.63261	0.59336	0.76328	0.57998	0.67369	0.88558	0.77636	0.68271	1.133	0.61295	0.61652	0.97444	0.53789	0.66442	1.0985	0.70554	0.54959	0.86201	0.68396	0.56513	0.85936	0.70564	0.70303	0.90287	0.69289	0.65877	1.0363	0.58478	0.67023	1.2136	0.75655	0.61213	1.1892	0.67659	0.67337	1.1027	0.96517	0.91041	0.66657	1.2032	0.76763
NaN	NaN	NaN	NaN	NaN	NaN	NaN	NaN	NaN	NaN	NaN	NaN	NaN	NaN	NaN	NaN	NaN	NaN	NaN	NaN	NaN	NaN	NaN	NaN	NaN	NaN	NaN	NaN	NaN	NaN	NaN	NaN	NaN	NaN	NaN	NaN	NaN	NaN	NaN	NaN	NaN	NaN	NaN	NaN	NaN	NaN	NaN	NaN	NaN	NaN
0.86506	0.77744	1.0964	0.64904	0.79144	NaN	0.33122	0.66865	NaN	NaN	0.65074	0.68797	0.64055	0.63619	0.97251	1.0059	0.64948	NaN	0.72989	0.61084	NaN	NaN	0.68124	NaN	0.70495	0.79477	NaN	0.81474	0.7166	NaN	0.78325	0.789	1.484	0.74985	0.56605	NaN	0.60285	0.72312	NaN	0.80712	0.56688	NaN	0.69516	0.62776	NaN	1.1001	NaN	0.60518	NaN	0.65936
NaN	NaN	NaN	NaN	NaN	NaN	NaN	NaN	NaN	NaN	NaN	NaN	NaN	NaN	NaN	NaN	NaN	NaN	NaN	NaN	NaN	NaN	NaN	NaN	NaN	NaN	NaN	NaN	NaN	NaN	NaN	NaN	NaN	NaN	NaN	NaN	NaN	NaN	NaN	NaN	NaN	NaN	NaN	NaN	NaN	NaN	NaN	NaN	NaN	NaN
NaN	NaN	NaN	NaN	0.8406	NaN	NaN	NaN	NaN	NaN	NaN	NaN	NaN	NaN	NaN	NaN	0.60695	NaN	0.79035	NaN	NaN	0.88842	NaN	NaN	NaN	NaN	NaN	NaN	NaN	NaN	NaN	NaN	NaN	NaN	NaN	NaN	NaN	NaN	NaN	0.91161	NaN	NaN	0.84247	NaN	NaN	1.15	NaN	NaN	NaN	1.1142
NaN	NaN	NaN	NaN	NaN	0.96381	NaN	NaN	NaN	NaN	NaN	NaN	NaN	NaN	NaN	NaN	NaN	NaN	NaN	NaN	NaN	NaN	NaN	NaN	NaN	NaN	NaN	NaN	NaN	NaN	NaN	NaN	NaN	NaN	NaN	NaN	NaN	NaN	NaN	NaN	NaN	NaN	NaN	NaN	NaN	NaN	NaN	NaN	NaN	NaN
0.75466	1.54	NaN	1.0374	NaN	NaN	NaN	NaN	NaN	1.2035	0.74667	NaN	1.2299	NaN	NaN	1.0196	NaN	NaN	NaN	0.75698	NaN	NaN	NaN	NaN	NaN	NaN	NaN	0.90794	NaN	NaN	1.023	NaN	NaN	0.94437	NaN	NaN	0.72238	NaN	NaN	0.75032	NaN	NaN	0.71384	1.0014	NaN	1.653	NaN	0.93496	NaN	1.1839
0.83728	0.64332	NaN	0.53809	0.55908	NaN	0.39194	0.50564	1.0428	0.71947	0.57858	0.88799	0.65092	0.75185	NaN	0.8936	0.54679	NaN	0.78934	0.5753	NaN	0.61985	0.54562	NaN	1.0305	0.58961	NaN	0.7355	0.68698	NaN	0.84346	0.69758	0.9479	0.82053	0.58373	NaN	0.63069	0.76936	NaN	0.79754	1.3338	NaN	0.84124	0.50439	NaN	0.99457	NaN	0.63368	NaN	NaN
NaN	NaN	NaN	NaN	NaN	NaN	NaN	NaN	NaN	NaN	NaN	NaN	NaN	NaN	NaN	NaN	NaN	NaN	NaN	NaN	NaN	NaN	NaN	NaN	NaN	NaN	NaN	NaN	NaN	NaN	NaN	NaN	NaN	NaN	NaN	NaN	NaN	NaN	NaN	NaN	NaN	NaN	NaN	NaN	NaN	NaN	NaN	NaN	NaN	NaN
NaN	NaN	NaN	NaN	NaN	NaN	NaN	NaN	NaN	NaN	NaN	NaN	NaN	NaN	NaN	NaN	NaN	NaN	NaN	NaN	NaN	NaN	NaN	NaN	NaN	NaN	NaN	NaN	NaN	NaN	NaN	NaN	NaN	NaN	NaN	NaN	NaN	NaN	NaN	NaN	NaN	NaN	NaN	NaN	NaN	NaN	NaN	NaN	NaN	NaN
NaN	NaN	NaN	NaN	NaN	NaN	NaN	NaN	NaN	NaN	NaN	NaN	NaN	NaN	NaN	NaN	NaN	NaN	NaN	NaN	NaN	NaN	NaN	NaN	NaN	NaN	NaN	NaN	NaN	NaN	NaN	NaN	NaN	NaN	NaN	NaN	NaN	NaN	NaN	NaN	NaN	NaN	NaN	NaN	NaN	NaN	NaN	NaN	NaN	NaN
0.90662	0.92707	1.1393	0.66413	0.75116	NaN	0.39304	0.72518	0.92148	0.75277	0.62211	1.241	0.68058	0.71246	NaN	0.8879	0.67738	1.045	0.74032	0.66743	1.1586	0.63645	0.85063	1.0606	0.72151	0.73441	0.94244	0.78205	0.67378	0.73149	0.79175	0.94166	NaN	0.79939	0.68279	1.0959	0.66163	0.72391	1.0259	0.87209	0.66766	1.1518	0.79083	0.77769	1.3066	1.0226	0.82345	0.76307	NaN	0.79743
0.84296	0.8028	1.227	0.54092	0.87579	0.87066	0.35931	0.69494	0.71008	0.79696	0.65858	0.7702	0.68806	0.69883	1.0551	1.0054	0.6858	0.92327	0.6424	0.63075	0.7419	0.68159	0.74753	0.8807	0.82101	0.83847	0.77342	0.72638	0.7287	0.72836	0.77716	0.91807	0.90645	0.82693	0.66174	1.0147	0.61072	1.178	0.81352	0.75094	0.73354	0.903	0.78822	0.82818	1.3478	1.0396	0.76612	0.88065	1.3435	0.92398
NaN	NaN	NaN	NaN	NaN	NaN	NaN	NaN	NaN	NaN	NaN	NaN	NaN	NaN	NaN	NaN	NaN	NaN	NaN	NaN	NaN	NaN	NaN	NaN	NaN	NaN	NaN	NaN	NaN	NaN	NaN	NaN	NaN	NaN	NaN	NaN	NaN	NaN	NaN	NaN	NaN	NaN	NaN	NaN	NaN	NaN	NaN	NaN	NaN	NaN
NaN	0.91087	NaN	0.96568	0.7987	NaN	NaN	0.84496	NaN	NaN	NaN	NaN	NaN	0.68292	NaN	NaN	0.83953	NaN	1.1205	0.67539	NaN	NaN	NaN	NaN	NaN	NaN	NaN	2.7785	NaN	NaN	1.3748	NaN	NaN	NaN	NaN	NaN	NaN	NaN	NaN	1.1444	NaN	NaN	2.8729	0.64985	NaN	NaN	NaN	NaN	NaN	NaN
NaN	NaN	NaN	NaN	NaN	NaN	NaN	NaN	NaN	NaN	NaN	NaN	NaN	NaN	NaN	NaN	NaN	NaN	NaN	NaN	NaN	NaN	NaN	NaN	NaN	NaN	NaN	NaN	NaN	NaN	NaN	NaN	NaN	NaN	NaN	NaN	NaN	NaN	NaN	NaN	NaN	NaN	NaN	NaN	NaN	NaN	NaN	NaN	NaN	NaN
0.82298	0.48648	1.0353	0.52926	0.62842	1.1301	0.31114	0.60392	0.71608	0.57098	0.62147	NaN	0.5397	0.69131	1.0514	0.92563	0.54717	1.0828	0.53402	0.56962	0.92899	0.49975	0.64272	1.1958	0.67763	0.51798	NaN	0.60173	0.57949	0.69576	0.63979	0.68289	1.0494	0.65341	0.62092	NaN	0.48046	0.63003	0.95678	0.71665	0.51278	NaN	0.66554	0.55759	NaN	0.8627	NaN	0.53933	1.4374	0.58662
0.94696	0.95213	0.98007	0.71751	0.77761	1.3065	0.39578	0.79812	0.87943	0.7938	0.76434	0.87255	0.64653	0.91725	1.0429	0.90126	0.78662	1.0292	0.77245	0.67742	0.94953	0.64971	0.83711	1.0761	0.73526	0.81086	1.0155	0.84297	0.72566	0.98126	0.74583	0.94479	1.0927	0.85361	0.56914	0.98266	0.68446	0.83939	0.93283	0.898	0.55175	1.1168	0.7609	0.68688	1.028	1.134	0.66589	0.62973	1.3783	0.76136
0.9114	0.73313	1.14	0.69355	0.72984	1.1293	0.4317	0.62575	1.0335	0.72852	0.67277	0.99526	0.61456	0.64821	1.0055	0.88906	0.64131	0.98428	0.69273	0.62439	0.91133	0.66665	0.68403	1.0679	0.79438	0.6536	1.0402	0.79874	0.69965	0.77348	0.77505	0.8266	0.857	0.86722	0.61121	1.1088	0.72895	0.74691	1.0451	0.78867	0.67506	1.0345	0.77149	0.72204	0.94973	1.0455	0.74893	0.69577	1.3169	0.73168
1.0351	0.7963	1.2018	0.81279	0.79792	NaN	NaN	0.71325	1.138	0.58255	0.70287	1.0351	0.81808	0.6852	1.0558	0.78809	0.73556	1.107	0.91002	0.57989	NaN	NaN	0.7993	1.1762	0.80697	0.85334	0.84798	0.64665	0.55432	0.86208	0.83107	0.72495	1.0329	0.6902	0.58541	1.3658	0.65735	0.79655	1.2534	0.9564	0.71861	1.1022	0.7874	0.72098	NaN	1.1136	0.73358	0.78112	1.74	0.71955
0.78893	NaN	1.0722	0.65148	1.078	1.1462	0.45673	NaN	0.83135	0.69127	NaN	0.87735	0.59475	0.71003	NaN	0.8632	0.61434	0.93274	0.56521	NaN	0.87694	0.5478	0.85334	1.7274	0.70435	0.59591	0.8549	0.53939	NaN	NaN	1.0186	0.62826	0.84872	NaN	0.7069	0.97747	0.63686	NaN	1.0705	0.60907	0.65779	1.0917	0.70649	0.97379	NaN	1.0729	0.68399	0.42412	1.5056	0.77476
0.70889	0.97043	1.0257	0.81626	0.4917	NaN	NaN	NaN	1.0799	NaN	NaN	NaN	0.64736	NaN	NaN	0.96262	NaN	1.0084	NaN	NaN	NaN	1.2056	0.60271	NaN	NaN	0.65509	NaN	NaN	NaN	NaN	NaN	NaN	NaN	0.64958	0.94775	NaN	NaN	NaN	NaN	NaN	1.0081	NaN	NaN	1.046	NaN	NaN	0.58292	0.91689	NaN	0.96482
1.084	NaN	NaN	NaN	NaN	NaN	NaN	NaN	NaN	NaN	NaN	NaN	NaN	NaN	NaN	NaN	NaN	0.96788	NaN	NaN	NaN	NaN	NaN	1.0284	NaN	NaN	0.67721	NaN	NaN	NaN	NaN	0.72165	NaN	NaN	NaN	NaN	NaN	NaN	0.93696	NaN	NaN	0.901	NaN	NaN	NaN	NaN	NaN	NaN	1.3898	0.46521
0.83613	0.79003	NaN	0.68668	NaN	NaN	0.52499	NaN	NaN	0.83122	NaN	1.353	0.72511	NaN	1.0244	0.96619	NaN	1.2805	0.53502	NaN	NaN	0.63622	NaN	1.6517	0.82808	NaN	NaN	0.84482	0.53479	NaN	0.93327	NaN	NaN	0.80769	NaN	1.4477	0.6414	NaN	1.508	0.94997	NaN	1.751	0.82755	NaN	1.2502	NaN	0.73124	NaN	NaN	NaN
0.65228	0.57937	1.2468	0.79199	0.59247	NaN	0.39202	0.58139	0.9404	NaN	NaN	0.55761	0.59095	0.60717	NaN	NaN	0.47981	NaN	0.82471	0.51592	NaN	0.49768	0.6572	NaN	0.84328	0.65412	NaN	0.64295	0.46784	NaN	0.70857	0.60265	0.81314	0.67328	0.52838	NaN	NaN	0.60735	NaN	0.72061	0.50158	NaN	0.59475	0.63781	NaN	NaN	0.65946	NaN	0.93677	0.54089
NaN	NaN	0.95048	NaN	NaN	NaN	NaN	NaN	NaN	0.43926	NaN	NaN	NaN	NaN	0.77024	NaN	NaN	NaN	NaN	NaN	NaN	NaN	NaN	NaN	NaN	NaN	NaN	NaN	0.58684	NaN	NaN	NaN	NaN	NaN	NaN	NaN	NaN	NaN	NaN	NaN	NaN	NaN	0.6996	NaN	NaN	0.78372	NaN	1.1744	NaN	0.84139
0.88167	0.7442	1.0005	0.5763	0.61949	1.4286	0.29318	0.59077	0.76023	0.79607	0.58948	0.82214	0.54753	0.54318	0.77731	0.8363	0.66219	0.95306	0.65451	0.4841	NaN	0.55696	0.60319	1.0907	0.62499	0.63471	0.83777	0.62329	0.47703	0.81719	0.68683	0.75054	0.88381	0.69271	0.64739	0.86425	0.52933	0.74754	0.9535	0.61276	0.54264	0.88461	0.57932	0.66907	0.7444	0.86156	0.63117	0.62979	1.0017	0.63551
0.893	0.84934	0.94484	0.68908	0.99615	1.0913	0.39996	0.73381	1.0079	0.71288	0.69378	0.8094	0.606	0.7231	1.075	0.80301	0.6259	0.93505	0.7163	0.62079	0.7421	0.622	0.70438	1.0297	0.75802	0.89817	0.82972	0.72345	0.82144	0.80416	0.7906	0.91387	1.018	0.73693	0.8197	1.1318	0.61427	1.0307	1.081	0.8773	0.82291	1.0173	0.74561	1.0391	1.0626	1.1741	0.72622	0.94311	1.2953	0.94882
NaN	NaN	NaN	NaN	NaN	NaN	NaN	NaN	NaN	NaN	NaN	NaN	NaN	NaN	NaN	NaN	NaN	NaN	NaN	NaN	NaN	NaN	NaN	NaN	NaN	NaN	NaN	NaN	NaN	NaN	NaN	NaN	NaN	NaN	NaN	NaN	NaN	NaN	NaN	NaN	NaN	NaN	NaN	NaN	NaN	NaN	NaN	NaN	NaN	NaN
0.82684	0.82138	NaN	0.57132	0.79967	1.0351	0.37715	0.76555	NaN	0.61445	0.6733	NaN	0.63316	0.72603	NaN	0.84231	0.8368	NaN	0.615	0.62091	0.80493	0.72723	0.68692	NaN	0.73659	0.63644	1.1289	0.74782	0.70492	NaN	0.89166	0.76856	NaN	0.66587	0.52072	1.0569	0.6198	0.74372	NaN	0.67966	0.59472	NaN	0.72209	0.73006	NaN	0.89602	NaN	0.6046	NaN	0.61411
0.87326	0.79362	1.0139	0.66021	0.74997	1.3458	0.34731	0.68072	0.68593	0.67546	0.62177	0.85516	0.60436	0.63259	1.0368	0.90918	0.67979	1.1199	0.66468	0.64273	1.0542	0.58628	0.85635	1.1892	0.7179	0.69884	0.81163	0.75671	0.63162	0.7217	0.72889	0.87999	0.92347	0.78776	0.61966	NaN	0.62512	0.74564	0.88075	0.81353	0.5229	1.0692	0.67562	0.58691	0.78781	0.97689	NaN	0.57672	1.2274	0.65555
0.59804	1.1813	NaN	0.76864	0.99362	NaN	0.37533	0.91034	NaN	0.96233	0.55647	NaN	NaN	0.79196	0.81019	1.4715	NaN	1.0481	NaN	0.72235	NaN	0.57121	0.75705	1.0802	NaN	0.80747	1.0492	0.75374	NaN	0.80557	0.86316	0.802	NaN	0.64785	0.79637	0.96227	0.59444	NaN	1.1113	0.55721	0.4003	1.0862	0.77552	0.40827	1.1137	0.83876	NaN	0.83853	1.1136	0.85923
0.7542	0.83255	0.97175	0.63521	0.72513	1.0873	0.41617	0.60861	0.98624	0.76248	0.62221	0.81626	0.53394	0.63956	0.91447	0.7845	0.61692	0.95028	0.58098	0.6557	0.97696	0.65401	0.6774	1.0476	0.72524	0.68658	0.79954	0.8052	0.60008	0.78632	0.82202	0.85129	0.84068	0.86563	0.63913	0.98225	0.63133	0.83971	1.015	0.83429	0.59893	0.91588	0.76191	0.74437	1.0123	1.0239	0.68161	0.80088	1.3299	0.70004
0.95769	0.71343	NaN	0.71956	0.75594	1.4367	0.44626	0.70142	1.023	0.92893	0.56475	0.80446	0.64935	0.58667	0.8604	0.87341	0.76981	0.89191	0.71055	0.57058	0.75184	0.58793	0.66027	0.95666	0.74319	0.77041	NaN	0.78531	0.72597	NaN	0.77871	1.2236	1.0923	0.77759	0.68702	0.89301	0.64843	0.85501	0.85474	0.73412	0.61966	0.97645	0.78387	0.71583	NaN	0.96043	0.68552	0.82813	0.96039	NaN
NaN	NaN	NaN	0.72296	NaN	NaN	NaN	NaN	NaN	NaN	NaN	NaN	0.668	0.93045	NaN	0.80738	NaN	NaN	NaN	0.60127	NaN	0.59875	0.66115	NaN	NaN	NaN	NaN	0.88768	NaN	NaN	0.78354	NaN	NaN	0.68312	NaN	NaN	NaN	NaN	NaN	NaN	NaN	NaN	0.74958	NaN	NaN	NaN	NaN	NaN	NaN	NaN
0.8355	0.66725	NaN	0.73547	0.62701	NaN	NaN	NaN	NaN	1.0899	NaN	NaN	0.76299	NaN	0.95486	1.0177	0.73698	NaN	0.83005	NaN	NaN	0.78985	NaN	NaN	1.0611	0.76264	NaN	0.88065	NaN	1.0181	0.85099	0.9368	1.0806	0.93916	NaN	NaN	0.6017	0.91058	NaN	0.7613	0.69002	NaN	0.83428	0.84983	NaN	1.2177	0.76563	0.82167	1.7843	0.83677
0.91456	0.55329	0.72265	0.54874	0.74824	NaN	0.38042	0.63813	NaN	0.62956	0.60561	NaN	0.61908	0.60775	NaN	0.8532	0.62955	0.90405	0.6494	0.51794	0.46907	0.68266	0.64898	NaN	0.77514	0.63112	NaN	0.71929	0.55942	NaN	0.74082	0.73198	2.5165	0.6688	0.50517	NaN	0.63058	0.65622	0.85931	0.73162	0.56921	NaN	0.65068	0.7314	NaN	0.93063	0.64289	0.62521	NaN	0.64859
NaN	NaN	NaN	NaN	NaN	NaN	NaN	NaN	NaN	NaN	NaN	NaN	NaN	NaN	NaN	NaN	NaN	NaN	NaN	NaN	NaN	NaN	NaN	NaN	NaN	NaN	NaN	NaN	NaN	NaN	NaN	NaN	NaN	NaN	NaN	NaN	NaN	NaN	NaN	NaN	NaN	NaN	NaN	NaN	NaN	NaN	NaN	NaN	NaN	NaN
NaN	NaN	NaN	NaN	NaN	NaN	NaN	NaN	NaN	NaN	NaN	NaN	NaN	NaN	NaN	NaN	NaN	NaN	NaN	NaN	NaN	NaN	NaN	NaN	NaN	NaN	NaN	NaN	NaN	NaN	NaN	NaN	NaN	NaN	NaN	NaN	0.68698	NaN	NaN	NaN	NaN	NaN	NaN	NaN	NaN	NaN	NaN	NaN	NaN	NaN
NaN	NaN	NaN	NaN	NaN	NaN	NaN	NaN	NaN	NaN	NaN	NaN	NaN	NaN	NaN	NaN	NaN	NaN	NaN	NaN	NaN	NaN	NaN	NaN	NaN	NaN	NaN	NaN	NaN	NaN	NaN	NaN	NaN	NaN	NaN	NaN	NaN	NaN	NaN	NaN	NaN	NaN	NaN	NaN	NaN	NaN	NaN	NaN	NaN	NaN
NaN	NaN	NaN	NaN	NaN	NaN	NaN	NaN	NaN	NaN	NaN	NaN	NaN	NaN	NaN	NaN	NaN	NaN	NaN	NaN	NaN	NaN	NaN	NaN	NaN	NaN	NaN	NaN	NaN	NaN	NaN	NaN	NaN	NaN	NaN	NaN	NaN	NaN	NaN	NaN	NaN	NaN	NaN	NaN	NaN	NaN	NaN	NaN	NaN	NaN
NaN	0.68285	NaN	NaN	0.60964	NaN	0.46216	0.71957	NaN	0.69527	0.72554	NaN	NaN	NaN	NaN	NaN	NaN	NaN	NaN	0.54676	NaN	NaN	0.68118	NaN	1.1114	0.66724	NaN	NaN	0.60298	NaN	NaN	0.81133	0.73969	1.1141	0.81868	NaN	NaN	NaN	NaN	0.75412	NaN	NaN	NaN	0.7241	0.72377	NaN	NaN	NaN	NaN	NaN
NaN	NaN	NaN	NaN	NaN	NaN	NaN	NaN	NaN	NaN	NaN	NaN	NaN	NaN	NaN	NaN	NaN	NaN	NaN	NaN	NaN	NaN	NaN	NaN	NaN	NaN	NaN	NaN	NaN	NaN	NaN	NaN	NaN	NaN	NaN	NaN	NaN	NaN	NaN	NaN	NaN	NaN	NaN	NaN	NaN	NaN	NaN	NaN	NaN	NaN
NaN	NaN	NaN	NaN	NaN	NaN	NaN	NaN	NaN	NaN	NaN	NaN	0.52552	NaN	NaN	NaN	NaN	NaN	NaN	NaN	NaN	NaN	NaN	NaN	NaN	NaN	NaN	NaN	NaN	NaN	NaN	NaN	NaN	NaN	NaN	NaN	NaN	NaN	NaN	NaN	NaN	NaN	NaN	NaN	NaN	NaN	NaN	NaN	NaN	NaN
NaN	NaN	NaN	NaN	NaN	NaN	NaN	NaN	NaN	NaN	NaN	NaN	NaN	NaN	NaN	NaN	NaN	NaN	NaN	NaN	NaN	NaN	NaN	NaN	NaN	NaN	NaN	NaN	NaN	NaN	NaN	NaN	NaN	NaN	NaN	NaN	NaN	NaN	NaN	NaN	NaN	NaN	NaN	NaN	NaN	NaN	NaN	NaN	NaN	NaN
NaN	1.3576	0.87703	1.1234	NaN	1.3013	0.42512	NaN	1.2053	3.3359	NaN	0.75216	1.0548	1.458	1.2658	1.1405	NaN	1.1416	1.5423	1.426	1.0323	3.1858	NaN	1.1461	0.95283	NaN	0.6448	0.96142	NaN	0.72446	1.7412	NaN	0.95318	1.1093	NaN	1.595	0.8995	NaN	NaN	NaN	NaN	1.671	NaN	NaN	1.4195	NaN	NaN	NaN	1.8234	NaN
0.81879	1.0057	1.081	0.61208	NaN	1.0686	0.36555	0.60588	1.0329	1.1703	0.60257	0.63854	0.74181	0.45794	0.88247	0.90644	NaN	0.91475	0.99248	0.70867	0.75391	1.5061	0.56062	0.90501	0.81514	0.46766	NaN	0.97876	0.57024	0.60697	0.91816	0.79074	0.74289	0.90485	0.61153	0.93821	0.96782	0.41404	0.82064	0.83524	0.53356	0.95619	1.1782	0.74969	NaN	0.65138	0.66614	0.63817	NaN	0.74318
0.95928	0.85074	1.055	0.75728	0.49002	1.149	0.37103	0.47354	1.0844	1.8119	0.48547	1.0695	0.68486	0.49011	0.97305	0.9101	0.47128	0.90743	0.80592	0.67787	0.86443	1.9183	0.56755	1.0092	0.67001	0.42793	0.82379	0.90938	0.47203	0.80421	0.86622	0.5417	1.0079	0.95856	0.47734	1.0135	0.77431	0.53031	1.0749	0.88708	0.32806	0.96791	0.60869	0.40055	1.0148	0.58616	0.65551	0.43513	1.4733	0.41263
0.71795	NaN	1.0174	1.0008	NaN	1.2428	NaN	NaN	0.62137	1.6515	NaN	1.0254	NaN	NaN	0.90813	0.98118	0.56827	0.82662	NaN	1.0084	0.74478	3.4403	NaN	0.95435	NaN	NaN	0.87303	0.67126	NaN	0.68008	0.63927	0.58769	0.84587	0.74281	NaN	0.79096	1.1312	NaN	0.75402	0.76408	NaN	0.80562	0.57453	NaN	0.71824	NaN	0.65508	NaN	1.2319	NaN
0.87345	0.6294	0.95808	0.62756	0.74664	1.0109	0.40007	0.62301	0.99218	0.70223	0.63712	0.53575	0.68244	0.66165	0.77402	0.85131	0.60912	0.83907	0.76663	0.55981	0.80426	0.65422	0.68657	0.86223	0.78469	0.68706	0.55664	0.87996	0.57948	0.68166	0.88158	0.65225	0.86666	0.7528	0.18215	0.76605	0.74603	0.68301	0.89394	0.82939	0.24484	0.81772	0.84067	0.29539	0.82358	0.62609	0.60992	0.26229	1.1644	0.27043
0.85867	0.76371	0.99078	0.53566	0.64498	1.2176	0.35752	0.53193	0.83892	0.61705	0.51654	0.85661	0.58835	0.57504	1.0063	0.76454	0.55285	1.0214	0.66118	0.54289	1.0829	0.63391	0.58694	1.4883	0.74959	0.63455	1.2275	0.67601	0.65302	0.9133	0.77182	0.65278	0.96183	0.74988	0.86722	1.0094	0.55573	0.69544	1.2256	0.74636	0.90891	1.2831	0.72693	0.65205	1.0251	1.0135	0.7932	0.9642	1.2175	1.0004
NaN	NaN	NaN	NaN	NaN	NaN	NaN	NaN	NaN	NaN	NaN	NaN	NaN	NaN	NaN	NaN	NaN	NaN	NaN	NaN	NaN	NaN	NaN	NaN	NaN	NaN	NaN	NaN	NaN	NaN	NaN	NaN	NaN	NaN	NaN	NaN	NaN	NaN	NaN	NaN	NaN	NaN	NaN	NaN	NaN	NaN	NaN	NaN	NaN	NaN
0.88915	0.77436	0.96132	0.66002	0.71261	1.2468	0.38709	0.64349	0.88431	0.83444	0.62846	0.87955	0.64035	0.66894	0.8853	0.8017	0.64154	0.91163	0.73096	0.60128	0.82903	0.6742	0.67189	1.058	0.69912	0.67289	0.82845	0.72784	0.59397	0.78632	0.78762	0.7301	0.98205	0.67644	0.61255	0.9982	0.62839	0.65412	0.96234	0.72889	0.58678	1.0258	0.73839	0.64611	0.76648	0.91995	0.68746	0.64501	1.277	0.62829
1.0273	0.73604	1.1521	0.61409	0.92098	1.1039	0.46678	0.60511	0.84571	1.0288	0.55401	0.91209	0.76919	0.86522	0.91056	NaN	0.65079	0.77261	0.72507	0.56589	0.86647	0.61074	0.78351	0.91712	NaN	0.85656	NaN	0.77176	0.59985	0.79216	1.0704	0.85279	0.8855	0.77918	0.69809	0.92103	0.6605	0.84678	0.76448	0.87072	0.6367	0.92156	0.64226	0.76307	0.68752	1.1339	0.86212	0.82161	1.2171	0.69493
0.82788	0.67241	1.2078	1.1332	NaN	1.1802	NaN	NaN	1.2535	1.3573	NaN	NaN	0.69489	NaN	0.85589	0.73225	0.36961	1.06	NaN	NaN	0.87875	1.4571	NaN	0.95355	0.98003	NaN	0.74756	1.1167	NaN	0.76787	0.71486	0.688	0.99232	1.0672	0.42568	1.0947	1.2443	NaN	1.5179	0.8005	NaN	1.1819	0.85712	NaN	0.88843	NaN	0.72471	NaN	1.5403	NaN
NaN	NaN	NaN	NaN	NaN	NaN	NaN	NaN	NaN	NaN	NaN	NaN	NaN	NaN	NaN	1.0886	NaN	NaN	NaN	NaN	NaN	NaN	NaN	NaN	NaN	NaN	NaN	NaN	NaN	NaN	NaN	NaN	NaN	0.93727	NaN	NaN	NaN	NaN	NaN	NaN	NaN	NaN	NaN	NaN	NaN	NaN	NaN	NaN	NaN	NaN
0.95362	0.77505	1.0302	0.50121	0.78993	1.0879	0.40571	0.66569	0.83281	0.84262	0.63547	0.86559	0.67897	0.67519	0.97456	0.79711	0.7693	1.0816	0.81253	0.55001	0.92117	0.50687	0.67019	1.0661	0.80208	0.74802	0.91094	0.75411	0.61073	0.84821	0.79153	0.78694	0.93145	0.66475	0.58304	1.1401	0.70243	0.78652	1.0912	0.83566	0.58517	1.1047	0.73671	0.66674	0.93452	1.1344	0.76191	0.64715	1.2959	0.68232
NaN	NaN	NaN	NaN	NaN	NaN	NaN	NaN	NaN	NaN	NaN	NaN	NaN	NaN	NaN	NaN	0.4884	NaN	NaN	0.67999	NaN	NaN	0.49516	NaN	NaN	NaN	NaN	0.75679	NaN	NaN	NaN	0.59375	NaN	0.75978	NaN	NaN	NaN	1.161	NaN	0.762	NaN	NaN	NaN	NaN	NaN	1.332	NaN	NaN	NaN	NaN
0.75582	0.7527	1.1503	NaN	0.52476	NaN	NaN	0.44234	0.90355	0.87269	0.54514	1.0406	NaN	0.59964	0.93995	0.96926	0.44289	0.69619	0.7225	0.75467	0.87558	0.98976	0.53153	0.83792	0.59123	0.48162	0.96547	NaN	NaN	0.57803	0.57339	0.64937	0.92663	0.85296	NaN	NaN	0.87503	NaN	0.96356	0.907	0.77417	0.95785	0.92325	0.9451	0.994	1.1108	0.67569	NaN	1.4486	0.65487
NaN	NaN	NaN	NaN	NaN	NaN	NaN	NaN	NaN	NaN	NaN	NaN	NaN	NaN	NaN	NaN	NaN	NaN	NaN	NaN	NaN	NaN	NaN	NaN	NaN	NaN	NaN	NaN	NaN	NaN	NaN	NaN	NaN	NaN	NaN	NaN	NaN	NaN	NaN	NaN	NaN	NaN	NaN	NaN	NaN	NaN	NaN	NaN	NaN	NaN
0.85323	0.82424	1.0074	0.80391	0.72533	1.2858	0.4135	0.69359	0.86692	0.72293	0.62656	0.90733	0.63604	0.67595	0.95208	0.79257	0.65629	1.0393	0.71465	0.61647	0.97916	0.61973	0.68817	1.0591	0.79568	0.76343	0.92674	0.70966	0.64583	0.91976	0.78359	0.78185	1.0616	0.74602	0.82231	1.1118	0.64483	0.76963	1.0397	0.81968	0.80341	1.1606	0.81728	0.73621	1.0143	1.0296	0.81418	0.69648	1.4509	0.70438
NaN	NaN	0.97464	NaN	0.66901	1.0609	NaN	0.52884	0.92225	NaN	NaN	0.85998	NaN	NaN	0.90744	NaN	0.6714	0.91163	NaN	NaN	0.83824	0.95955	NaN	1.0494	NaN	NaN	0.85287	NaN	NaN	NaN	NaN	NaN	0.93973	NaN	NaN	0.96258	NaN	NaN	0.95288	NaN	NaN	0.93768	NaN	NaN	NaN	NaN	0.57206	NaN	1.1539	NaN
NaN	0.65521	NaN	0.95878	NaN	NaN	NaN	NaN	NaN	1.2814	0.95478	NaN	1.0269	NaN	NaN	1.1909	NaN	NaN	0.69358	1.2086	NaN	0.93152	NaN	NaN	NaN	1.384	NaN	0.95676	1.313	NaN	NaN	1.268	NaN	0.51181	1.7149	NaN	NaN	1.3476	NaN	NaN	1.3472	NaN	0.46432	NaN	NaN	NaN	NaN	NaN	NaN	NaN
0.94011	0.83609	0.99902	0.96109	0.8884	1.3082	0.50661	0.72188	0.77574	0.8972	0.62074	1.0272	0.76667	0.66792	1.0832	0.95431	0.6942	1.19	0.79288	0.60626	0.9469	0.76001	0.84681	1.2908	0.79521	0.72067	1.1078	1.0021	0.6518	0.94674	0.79745	0.7924	1.16	0.83912	0.75177	1.1274	0.66919	0.81707	1.1305	0.89962	0.63248	1.2438	0.89304	0.80997	1.0154	1.1391	0.90478	0.61149	1.3979	0.81119
0.90673	0.80621	1.0633	0.73276	0.76508	1.091	0.41969	0.58348	0.99993	0.74027	0.6186	0.79758	0.61809	0.68398	0.85022	0.87903	0.64522	0.86235	0.86813	0.62517	0.82302	0.71979	0.77406	0.9006	0.73441	0.73073	0.66495	0.73203	0.59981	0.67177	0.74915	0.78623	0.94456	0.77314	1.2577	0.91792	0.64947	0.90604	0.88318	0.76847	0.99597	0.94196	0.80902	1.0012	0.97685	1.3034	0.6232	0.77469	1.3209	0.76988
0.83978	0.9048	0.93552	0.82073	0.90692	1.0629	0.62014	0.72259	1.1223	0.76845	0.72761	0.82532	0.9224	0.70925	1.0113	0.79203	0.65146	0.82926	0.95938	0.59292	0.89646	0.61012	0.78147	0.98234	0.84304	0.60383	0.77139	0.72839	0.64167	0.77489	0.78472	1.0201	0.84356	0.79813	0.89603	0.91919	0.76794	0.70784	0.8281	0.81564	0.91931	0.85816	1.0171	1.2296	0.88138	1.4676	0.70959	0.86194	1.2138	1.0194
NaN	NaN	NaN	NaN	NaN	NaN	NaN	NaN	NaN	NaN	NaN	NaN	NaN	NaN	NaN	NaN	NaN	NaN	NaN	NaN	NaN	NaN	NaN	NaN	NaN	NaN	NaN	NaN	NaN	NaN	NaN	NaN	NaN	NaN	NaN	NaN	NaN	NaN	NaN	NaN	NaN	NaN	NaN	NaN	NaN	NaN	NaN	NaN	NaN	NaN
0.98648	0.78342	1.0599	0.67975	0.76072	NaN	0.39368	0.66531	NaN	0.80277	0.62509	0.90086	0.67315	0.59439	1.0537	1.0702	0.72281	1.0985	0.83534	0.58728	NaN	0.6137	0.61111	NaN	0.71508	0.66136	0.97433	0.87979	0.67023	0.97647	0.75325	0.60636	1.118	0.81493	0.70868	0.77698	0.68996	0.92259	0.97849	0.93022	0.90095	1.0973	0.94887	0.94165	1.4094	1.3746	0.97894	0.88804	NaN	0.78686
1.0166	0.77334	NaN	0.60366	0.67622	NaN	NaN	0.78958	NaN	0.83043	0.63332	NaN	0.61947	0.60226	1.1608	0.82966	0.62087	NaN	0.7362	0.71723	NaN	0.63776	0.8121	NaN	0.80331	0.73099	NaN	0.62937	0.54652	NaN	0.82085	0.74963	NaN	0.7355	NaN	NaN	0.64649	0.75634	NaN	0.7591	0.54041	NaN	0.77268	0.72669	NaN	1.011	NaN	0.79611	NaN	0.66365
1.0143	0.95248	0.90735	0.69343	0.95034	NaN	0.30483	0.6186	1.2867	0.75017	0.73095	0.94709	0.69344	0.53992	0.81164	0.79515	NaN	0.90219	0.67999	0.75228	NaN	0.93007	0.80976	0.92167	0.81885	0.65241	0.8458	0.66916	0.73502	0.66985	0.79223	0.77298	0.82483	0.66537	0.80744	0.85452	0.80128	NaN	0.93293	0.70568	0.96811	NaN	0.65372	1.2707	1.0361	1.1734	0.70426	0.6904	1.2047	0.77366
NaN	NaN	NaN	NaN	NaN	NaN	NaN	NaN	NaN	NaN	NaN	NaN	NaN	NaN	NaN	NaN	NaN	NaN	NaN	NaN	NaN	NaN	NaN	NaN	NaN	NaN	NaN	NaN	NaN	NaN	NaN	NaN	NaN	0.9131	NaN	NaN	NaN	NaN	NaN	NaN	NaN	NaN	NaN	NaN	NaN	NaN	NaN	NaN	NaN	NaN
NaN	NaN	NaN	NaN	NaN	NaN	NaN	NaN	NaN	NaN	NaN	NaN	NaN	NaN	NaN	NaN	NaN	NaN	NaN	NaN	NaN	NaN	NaN	NaN	NaN	NaN	NaN	NaN	NaN	NaN	NaN	NaN	NaN	NaN	NaN	NaN	NaN	NaN	NaN	NaN	NaN	NaN	NaN	NaN	NaN	NaN	NaN	NaN	NaN	NaN
NaN	NaN	NaN	NaN	NaN	NaN	NaN	NaN	NaN	NaN	NaN	NaN	NaN	NaN	NaN	NaN	NaN	NaN	NaN	NaN	NaN	NaN	NaN	NaN	NaN	NaN	NaN	NaN	NaN	NaN	NaN	NaN	NaN	NaN	NaN	NaN	NaN	NaN	NaN	NaN	NaN	NaN	NaN	NaN	NaN	NaN	NaN	NaN	NaN	NaN
NaN	NaN	NaN	NaN	NaN	NaN	NaN	NaN	NaN	NaN	NaN	NaN	NaN	NaN	NaN	NaN	NaN	NaN	NaN	NaN	NaN	NaN	NaN	NaN	NaN	NaN	NaN	NaN	NaN	NaN	0.79163	NaN	NaN	NaN	NaN	NaN	NaN	NaN	NaN	NaN	NaN	NaN	NaN	NaN	NaN	NaN	NaN	NaN	NaN	NaN
NaN	NaN	NaN	NaN	NaN	NaN	NaN	NaN	NaN	NaN	NaN	NaN	NaN	NaN	NaN	NaN	NaN	NaN	NaN	NaN	NaN	NaN	NaN	NaN	NaN	0.53056	NaN	NaN	NaN	NaN	NaN	NaN	NaN	NaN	NaN	NaN	NaN	0.90474	NaN	NaN	NaN	NaN	NaN	NaN	NaN	1.0756	NaN	0.71566	NaN	NaN
1.0573	NaN	NaN	NaN	NaN	NaN	NaN	NaN	NaN	NaN	NaN	NaN	NaN	NaN	NaN	NaN	NaN	NaN	NaN	NaN	NaN	NaN	NaN	NaN	0.8595	NaN	NaN	1.001	NaN	NaN	NaN	NaN	NaN	NaN	NaN	NaN	NaN	NaN	NaN	NaN	NaN	NaN	0.80174	NaN	NaN	NaN	NaN	0.68997	NaN	NaN
NaN	NaN	NaN	NaN	NaN	NaN	NaN	NaN	NaN	NaN	NaN	NaN	NaN	NaN	NaN	NaN	NaN	NaN	NaN	NaN	NaN	NaN	NaN	NaN	NaN	NaN	NaN	NaN	NaN	NaN	NaN	NaN	0.81664	NaN	NaN	NaN	NaN	NaN	NaN	NaN	NaN	NaN	NaN	NaN	0.60634	NaN	NaN	NaN	NaN	NaN
0.93186	0.8004	NaN	0.66424	0.75808	NaN	0.31029	NaN	NaN	1.1794	0.60156	NaN	0.67769	0.952	NaN	0.91414	0.5074	NaN	0.82742	NaN	1.0766	0.52046	NaN	NaN	0.75945	0.58608	NaN	0.79125	NaN	NaN	0.79326	NaN	NaN	0.75899	NaN	NaN	0.65525	NaN	NaN	0.87609	NaN	NaN	0.8145	NaN	NaN	1.2738	NaN	NaN	NaN	NaN
NaN	NaN	NaN	NaN	NaN	NaN	NaN	NaN	NaN	NaN	NaN	NaN	NaN	NaN	NaN	NaN	NaN	NaN	NaN	NaN	NaN	NaN	NaN	NaN	NaN	NaN	NaN	NaN	NaN	NaN	NaN	NaN	NaN	NaN	NaN	NaN	NaN	NaN	NaN	NaN	NaN	NaN	NaN	NaN	NaN	NaN	NaN	NaN	NaN	NaN
0.94742	0.84939	0.98948	0.67897	0.67679	0.99026	0.42553	0.643	0.95696	0.66332	0.587	0.81988	0.61914	0.6762	0.84755	0.91196	0.62012	0.94488	0.69443	0.58392	0.71158	0.59379	0.78529	1.0181	0.74279	0.7921	0.85759	0.66599	0.71263	0.77719	0.83609	0.82464	0.91162	0.6376	0.62071	0.97114	0.5858	0.79466	0.99032	0.83019	0.84885	0.85343	0.67506	0.81756	0.91527	1.0699	0.79292	0.76099	1.3156	0.78865
0.90621	0.77869	0.86169	0.56959	0.77622	1.0836	0.38081	0.62662	0.83072	0.61391	0.56381	0.8112	0.58036	0.65674	0.86986	0.7758	0.60152	0.95544	0.60929	0.58703	0.80654	0.57954	0.70942	0.94631	0.74312	0.69253	0.77519	0.6887	0.66312	0.74194	0.74392	0.79467	0.87106	0.74861	0.66186	0.98511	0.5972	0.73946	0.8177	0.85652	0.61885	1.0298	0.71742	0.71617	0.83257	1.0595	0.71759	0.71733	1.3749	0.65834
1.1019	NaN	NaN	NaN	NaN	NaN	0.3599	NaN	NaN	1.2976	0.45206	NaN	0.73954	NaN	NaN	0.79038	0.65919	NaN	0.84303	NaN	NaN	NaN	0.5373	NaN	0.83703	NaN	NaN	0.92934	NaN	NaN	0.78907	NaN	NaN	0.73286	NaN	NaN	NaN	NaN	NaN	NaN	NaN	NaN	0.94638	NaN	NaN	NaN	NaN	NaN	NaN	NaN
1.0891	NaN	NaN	0.55901	0.84153	NaN	0.32086	NaN	NaN	0.72455	NaN	NaN	0.53911	NaN	NaN	0.78182	NaN	0.8551	0.59872	0.62115	NaN	0.59525	0.6143	NaN	0.7453	NaN	0.86773	0.74693	NaN	0.77877	0.88667	NaN	NaN	0.68961	0.59432	NaN	0.58387	NaN	NaN	0.78283	NaN	NaN	0.78882	NaN	NaN	1.1818	NaN	0.62042	NaN	0.51004
NaN	NaN	NaN	NaN	NaN	NaN	NaN	NaN	NaN	NaN	NaN	NaN	NaN	NaN	NaN	NaN	NaN	NaN	NaN	NaN	NaN	NaN	NaN	NaN	NaN	NaN	NaN	NaN	NaN	NaN	NaN	NaN	NaN	NaN	NaN	NaN	NaN	NaN	NaN	NaN	NaN	NaN	NaN	NaN	NaN	NaN	NaN	NaN	NaN	NaN
0.70452	NaN	NaN	NaN	NaN	NaN	NaN	NaN	NaN	NaN	NaN	NaN	NaN	NaN	NaN	NaN	NaN	NaN	NaN	NaN	NaN	NaN	NaN	NaN	NaN	NaN	NaN	NaN	NaN	NaN	NaN	NaN	NaN	NaN	NaN	NaN	NaN	NaN	NaN	NaN	NaN	NaN	NaN	NaN	NaN	NaN	NaN	NaN	NaN	NaN
0.88124	0.6692	NaN	NaN	1.0412	NaN	NaN	0.80343	NaN	0.71698	0.72354	NaN	NaN	0.6555	NaN	0.78296	0.84658	NaN	NaN	0.69406	NaN	0.55187	0.91265	NaN	0.85102	0.89851	NaN	NaN	0.70475	NaN	0.84184	0.99439	NaN	0.75772	NaN	NaN	NaN	0.85205	NaN	NaN	NaN	NaN	0.8768	NaN	NaN	0.85249	NaN	0.65449	NaN	0.35025
0.85965	0.89728	NaN	0.68315	0.79392	NaN	0.38182	0.66489	NaN	0.60088	0.59743	NaN	0.65504	0.72516	NaN	0.9591	0.23818	NaN	0.6266	0.48534	NaN	0.7176	0.63176	NaN	0.59457	0.77719	NaN	0.83934	0.46459	NaN	0.74996	0.75128	NaN	0.80477	0.49416	NaN	0.76185	NaN	0.78756	0.82029	0.51439	NaN	0.89743	0.59016	NaN	1.2201	0.62188	NaN	NaN	0.58559
NaN	NaN	NaN	NaN	NaN	NaN	NaN	NaN	NaN	NaN	NaN	NaN	NaN	NaN	NaN	NaN	NaN	NaN	NaN	NaN	NaN	NaN	NaN	NaN	NaN	NaN	NaN	NaN	NaN	NaN	NaN	NaN	NaN	NaN	NaN	NaN	NaN	NaN	NaN	NaN	NaN	NaN	NaN	NaN	NaN	NaN	NaN	NaN	NaN	NaN
0.95416	NaN	0.92295	NaN	0.73784	NaN	0.45239	NaN	NaN	0.54543	0.75013	NaN	NaN	NaN	NaN	0.95901	0.8687	NaN	NaN	0.71458	NaN	0.60749	0.76084	NaN	0.77603	1.0227	NaN	0.78063	0.69859	NaN	0.81722	1.0431	NaN	0.68326	NaN	NaN	NaN	1.2187	NaN	0.85296	NaN	NaN	0.77292	NaN	NaN	NaN	NaN	0.82788	NaN	0.95425
0.7313	0.66021	0.86613	0.62556	0.68316	NaN	0.35765	0.43698	NaN	0.71461	0.75951	0.91139	0.61502	0.60779	0.99821	0.68817	0.43384	0.86948	0.71176	0.59992	0.95139	0.64326	0.74766	1.009	0.67397	0.65171	0.8943	0.68021	0.56295	0.87371	0.54081	0.70812	1.2921	0.68942	0.47655	0.9928	0.67466	0.47788	0.95184	0.80389	0.43193	1.1823	0.71406	0.47215	0.87578	0.93535	NaN	0.52718	1.2724	0.49854
0.95134	0.98535	1.0155	0.64825	0.73327	0.94313	0.37546	0.72016	0.81078	0.77472	0.66816	0.73749	0.64966	0.7307	0.91169	0.79116	0.64861	1.0428	0.63769	0.57771	0.89328	0.57772	0.72778	0.99696	0.75684	0.75029	0.87029	0.72164	0.59862	0.83364	0.755	0.72958	0.9618	0.81424	0.7503	1.0265	0.597	0.77168	1.0088	0.78699	0.73168	1.0139	0.73269	0.76302	1.1016	1.112	0.66041	0.74104	1.2133	0.78121
NaN	NaN	NaN	NaN	NaN	NaN	NaN	NaN	NaN	NaN	NaN	NaN	NaN	NaN	NaN	NaN	NaN	NaN	NaN	NaN	NaN	NaN	NaN	NaN	NaN	NaN	NaN	NaN	NaN	NaN	NaN	NaN	NaN	0.58137	NaN	NaN	NaN	NaN	NaN	NaN	NaN	NaN	NaN	NaN	NaN	NaN	NaN	NaN	NaN	NaN
0.89255	0.75096	1.014	0.62052	0.69919	1.1386	0.36365	0.6099	0.82902	0.65441	0.59034	0.87602	0.62399	0.65002	0.95284	0.87824	0.6239	0.9319	0.72764	0.56991	0.9109	0.57087	0.6785	0.97872	0.7719	0.6954	0.9009	0.74129	0.58547	0.91233	0.80313	0.75018	0.94824	0.78973	0.61915	0.98651	0.60242	0.75692	0.98758	0.80751	0.65871	1.0409	0.76566	0.67745	0.98131	0.97469	0.76749	0.72073	1.3156	0.73033
NaN	NaN	NaN	NaN	NaN	NaN	NaN	NaN	NaN	NaN	NaN	NaN	NaN	NaN	NaN	NaN	NaN	NaN	NaN	NaN	NaN	NaN	NaN	NaN	NaN	NaN	NaN	NaN	NaN	NaN	NaN	NaN	NaN	NaN	NaN	NaN	NaN	NaN	NaN	NaN	NaN	NaN	NaN	NaN	NaN	NaN	NaN	NaN	NaN	NaN
NaN	NaN	NaN	NaN	NaN	NaN	NaN	NaN	NaN	NaN	NaN	NaN	NaN	1.2873	NaN	NaN	NaN	NaN	NaN	NaN	NaN	0.56588	NaN	NaN	0.64235	NaN	NaN	NaN	NaN	NaN	NaN	NaN	NaN	0.71876	NaN	NaN	NaN	NaN	NaN	NaN	NaN	NaN	NaN	NaN	NaN	NaN	NaN	NaN	NaN	NaN
0.73407	0.74175	1.0719	0.72735	0.56129	1.1646	0.35313	0.52017	1.0862	1.9167	0.49233	1.0315	0.83782	0.53361	1.0136	1.0741	0.50932	1.0784	0.80269	0.67473	1.1769	2.2937	0.71234	1.1464	0.67332	0.46833	1.0087	0.879	0.53239	0.79084	0.87046	0.57551	1.0314	0.63661	0.4786	1.2227	0.55993	0.5194	1.2333	0.63455	0.26475	1.2353	0.4732	0.28883	0.83905	0.56352	0.74877	NaN	1.6308	0.32753
NaN	NaN	NaN	NaN	NaN	NaN	NaN	NaN	NaN	NaN	NaN	NaN	NaN	NaN	NaN	NaN	NaN	NaN	NaN	NaN	NaN	NaN	NaN	NaN	NaN	NaN	NaN	NaN	NaN	NaN	NaN	NaN	NaN	NaN	NaN	NaN	NaN	NaN	NaN	NaN	NaN	NaN	NaN	NaN	NaN	NaN	NaN	NaN	NaN	NaN
0.89355	0.67617	0.86723	0.50339	0.65603	1.0388	0.33354	0.69053	0.95847	0.60235	0.65461	0.97405	0.50593	0.76889	0.76299	0.90069	0.62483	1.0117	0.6401	0.64374	0.82234	0.56802	0.83675	1.0359	0.71317	0.75549	0.9327	0.67856	0.51923	0.87842	0.7923	0.72106	0.97585	0.72484	0.61975	0.69311	0.57382	0.79309	1.1163	0.72558	0.63123	1.1506	0.69553	0.73013	0.87219	1.042	0.66431	0.70957	1.1583	0.62531
0.88413	0.8415	1.094	0.64115	0.81479	1.0603	0.38245	0.69446	0.8794	0.74741	0.62276	0.90493	0.6419	0.68551	0.85269	0.85169	0.67888	0.8737	0.77019	0.64499	0.83008	0.62398	0.72352	0.95162	0.77237	0.71443	0.73806	0.70073	0.68317	0.89567	0.76712	0.84793	0.86473	0.75243	0.74724	0.90644	0.62245	0.84002	0.94122	0.79409	0.68027	0.90115	0.75059	0.72727	0.87396	1.1118	0.6701	0.79454	1.3316	0.73164
NaN	NaN	NaN	NaN	NaN	NaN	NaN	NaN	NaN	NaN	NaN	NaN	NaN	NaN	NaN	NaN	NaN	NaN	NaN	NaN	NaN	NaN	NaN	NaN	NaN	NaN	NaN	NaN	NaN	NaN	NaN	NaN	NaN	NaN	NaN	NaN	NaN	NaN	NaN	NaN	NaN	NaN	NaN	NaN	NaN	NaN	NaN	NaN	NaN	NaN
NaN	NaN	NaN	NaN	NaN	NaN	NaN	NaN	NaN	NaN	NaN	NaN	NaN	NaN	NaN	NaN	NaN	NaN	NaN	NaN	NaN	NaN	NaN	NaN	NaN	NaN	NaN	NaN	NaN	NaN	NaN	NaN	NaN	NaN	NaN	NaN	NaN	NaN	NaN	NaN	NaN	NaN	NaN	NaN	NaN	NaN	NaN	NaN	NaN	NaN
0.91002	0.78007	1.0254	0.59485	0.68263	1.1501	0.3683	0.60054	0.79956	0.67989	0.61546	0.88783	0.62948	0.66728	0.92054	0.81441	0.58436	0.91496	0.70484	0.61485	0.87159	0.61776	0.64604	1.0271	0.72493	0.66937	0.89561	0.67116	0.57452	0.91747	0.73903	0.74015	1.0022	0.79758	0.55492	0.97965	0.65789	0.69838	1.0446	0.82534	0.66448	1.1324	0.78253	0.65797	0.91445	1.1225	0.77658	0.66621	1.3648	0.63931
0.85181	0.64983	0.92567	0.67066	0.7018	2.0333	0.35529	0.66897	0.87325	0.81464	0.59294	0.90344	0.6292	0.60675	0.88858	0.86927	0.70756	0.96233	0.71232	0.65392	NaN	0.83485	0.70213	1.4873	0.79657	0.759	0.92903	0.7261	0.63938	0.84858	0.86562	0.80125	0.8968	0.80678	0.55814	NaN	0.61092	0.69271	0.95038	0.79598	NaN	1.0899	0.78719	0.65844	0.72119	0.95786	0.78181	0.46698	1.3235	NaN
0.85909	0.81657	1.0491	0.64767	0.73173	1.5676	0.39535	0.55982	0.97919	0.78716	0.6332	0.99713	0.61496	0.61322	0.99558	0.88128	0.61905	0.94317	0.68815	0.54935	0.99733	0.65277	0.66404	0.9521	0.75276	0.63602	0.79158	0.68516	0.61833	0.86145	0.78185	0.7242	1.019	0.73103	0.68224	1.005	0.48222	0.67869	0.9143	0.73595	0.80102	0.92097	0.66371	0.93966	0.88453	1.0402	0.72284	0.74141	1.2284	0.83031
0.76761	0.72471	0.95059	0.74766	0.71444	0.95746	0.38481	0.60813	0.72784	0.82262	0.5437	0.81239	0.57176	0.64132	0.99632	0.89035	0.6455	1.0222	0.71348	0.48632	NaN	0.50014	0.66544	NaN	0.66425	0.71062	1.2689	0.80156	0.61858	1.4091	0.73621	0.87045	1.0707	0.79563	0.7856	1.279	0.82738	0.73519	1.4339	0.89672	0.72051	NaN	0.81697	0.79139	NaN	1.0822	0.67691	0.61284	1.6685	0.86043
0.91481	0.79036	0.95083	0.71907	0.68197	1.0325	0.45659	0.62456	0.97593	1.295	0.60783	0.8617	0.72481	0.65342	0.97732	0.96724	0.60055	0.96616	0.7955	0.56568	0.8122	1.2336	0.65812	0.9599	0.82733	0.67494	0.81267	0.77892	0.58492	0.85537	0.86806	0.70942	0.9043	0.84657	0.62054	1.0731	0.67713	0.68863	0.93478	0.84017	0.5701	0.95006	0.80187	0.67733	0.82056	0.93529	0.72712	0.63915	1.4237	0.63978
0.78689	0.69345	1.0175	0.62446	0.71534	1.1677	0.37859	0.63157	1.0927	0.81115	0.55555	0.99969	0.5864	0.63519	1.0864	0.84201	0.56444	0.93587	0.72933	0.492	0.71465	0.71097	0.6367	1.0191	0.64163	0.63979	0.94288	0.73117	0.71972	0.80984	0.74144	0.69404	0.86554	0.75486	0.5838	1.0566	0.58387	0.65709	NaN	0.76104	0.60784	1.0669	0.67871	0.6671	0.89176	1.0816	0.84711	0.72063	1.2404	0.81522
0.98223	NaN	NaN	0.6142	0.86486	NaN	NaN	0.72557	NaN	NaN	0.5763	NaN	0.643	NaN	NaN	NaN	0.66661	NaN	0.6958	0.91978	NaN	1.7628	NaN	NaN	0.73619	1.3202	NaN	0.64814	NaN	NaN	NaN	NaN	NaN	NaN	0.45749	NaN	0.6997	NaN	NaN	0.78698	NaN	NaN	0.78672	NaN	NaN	1.0114	NaN	NaN	NaN	NaN
0.92171	0.75214	NaN	0.57972	0.70804	NaN	0.33376	0.63724	0.98305	0.6344	0.51168	0.8106	0.62926	0.55746	0.91332	0.81881	0.71402	NaN	0.6971	0.51369	0.96733	0.70426	0.64435	NaN	0.73213	0.70166	NaN	0.70568	0.60016	NaN	0.85108	0.62174	1.1465	0.79893	0.52732	NaN	0.55411	0.58778	0.89226	0.89098	0.46178	0.97734	0.58926	0.66009	0.82416	1.1592	0.5816	0.64356	1.694	0.55682
NaN	NaN	1.1669	0.64926	NaN	NaN	NaN	NaN	0.74285	NaN	NaN	NaN	NaN	NaN	NaN	NaN	NaN	NaN	NaN	NaN	NaN	NaN	NaN	NaN	NaN	NaN	NaN	0.61736	NaN	NaN	NaN	NaN	NaN	NaN	NaN	NaN	0.74934	NaN	NaN	0.75125	NaN	NaN	NaN	NaN	NaN	NaN	NaN	NaN	NaN	NaN
NaN	NaN	NaN	NaN	NaN	NaN	NaN	NaN	NaN	NaN	NaN	NaN	NaN	NaN	NaN	NaN	NaN	NaN	NaN	NaN	NaN	NaN	NaN	NaN	NaN	NaN	NaN	NaN	NaN	NaN	NaN	NaN	NaN	NaN	NaN	NaN	NaN	NaN	NaN	NaN	NaN	NaN	NaN	NaN	NaN	NaN	NaN	NaN	NaN	NaN
0.86734	0.69993	0.97189	0.59318	0.75598	1.1714	0.41434	0.72932	0.88061	0.78509	0.68015	0.83952	0.65082	0.65069	0.8992	0.94432	0.63791	0.97944	0.70828	0.60411	0.92588	0.67199	0.6785	0.9271	0.72387	0.76432	0.84264	0.78899	0.59182	0.74211	0.66466	0.69459	0.97306	0.744	0.45185	0.83539	0.60241	0.64777	0.89062	0.66141	0.50184	0.93402	0.63513	0.64422	0.78763	0.89087	0.72546	0.60571	1.2251	0.64201
0.84836	0.90852	0.96627	0.68319	0.79918	1.1062	0.42076	0.64814	0.88986	0.73517	0.6981	0.87543	0.72023	0.69622	1.0038	0.88605	0.70446	0.9506	0.75622	0.6141	0.88969	0.65424	0.76385	1.0759	0.76248	0.76888	0.88714	0.74198	0.68723	0.88451	0.83066	0.86324	0.9511	0.79199	0.66122	1.0042	0.64888	0.77641	1.0147	0.8121	0.65147	1.0348	0.73357	0.72334	0.90981	1.1138	0.73009	0.64971	1.3047	0.6876
0.84362	0.81838	1.0105	0.64355	0.72139	1.1714	0.3851	0.63667	0.81673	0.71038	0.67764	0.92531	0.63711	0.6532	0.89637	0.83232	0.63687	0.91361	0.69007	0.60211	0.83763	0.674	0.66507	0.95437	0.72906	0.68556	0.85863	0.67834	0.61148	0.82647	0.76153	0.76009	0.88434	0.73474	0.65222	0.94831	0.62332	0.70947	0.99393	0.77839	0.60479	1.0522	0.72646	0.73077	0.86084	1.0111	0.6937	0.72364	1.1581	0.68003
NaN	NaN	NaN	NaN	0.67437	NaN	NaN	NaN	NaN	NaN	0.52231	NaN	NaN	NaN	NaN	NaN	NaN	NaN	NaN	NaN	NaN	NaN	0.54591	NaN	NaN	NaN	NaN	0.61097	0.5051	NaN	NaN	0.75855	NaN	0.52163	0.44548	NaN	NaN	0.78301	NaN	NaN	0.49344	NaN	NaN	NaN	NaN	NaN	NaN	NaN	NaN	NaN
0.80753	0.83842	1.078	0.71368	0.7946	1.1722	0.50035	0.82006	0.92514	0.84031	0.83441	0.80991	0.64683	0.84614	0.74763	0.86746	0.78272	1.0948	0.75381	0.76738	0.83563	0.5941	0.75814	1.0175	0.75329	0.84587	0.76292	0.61736	0.61121	0.77611	0.87048	0.80502	0.88157	0.78387	0.56335	0.87756	0.61318	0.87516	0.84642	0.89572	0.54898	0.96953	0.76147	0.70804	0.9217	1.0484	0.77526	0.78519	1.3327	NaN
0.92754	0.69103	1.01	0.63232	0.84799	1.0788	0.40464	0.60118	0.94748	0.67947	0.61378	0.89339	0.58465	0.6393	0.93097	0.78769	0.57978	0.92955	0.78277	0.6562	0.82197	0.67969	0.81107	0.9601	0.7977	0.73263	0.78438	0.74021	0.69014	0.74456	0.78735	0.70737	0.89748	0.73724	0.60066	0.91471	0.73765	0.73883	0.92287	0.86081	0.52183	1.0134	0.78438	0.67292	0.85238	1.1889	0.68629	0.62795	1.2704	0.64276
0.77694	0.77962	NaN	0.67204	0.70438	NaN	0.2691	0.70306	NaN	1.1124	0.78083	NaN	0.7493	0.56723	0.8885	1.1491	0.68978	1.0721	0.52874	0.74182	NaN	0.79773	0.63856	NaN	0.77756	1.2443	1.2603	0.64857	NaN	NaN	0.64425	0.78549	NaN	0.63403	0.64221	1.0609	0.49457	0.74062	NaN	0.84495	0.73286	1.1284	0.55996	0.84265	NaN	0.97494	NaN	0.93784	NaN	0.62341
0.84229	0.78183	1.0235	0.67618	0.72522	1.1937	0.3659	0.69401	0.91744	0.74554	0.63007	0.91515	0.6264	0.68157	0.88882	0.8307	0.62868	1.0124	0.68323	0.62724	0.86896	0.6082	0.6644	0.91873	0.71792	0.71321	0.91919	0.68268	0.61662	0.87172	0.77234	0.77541	0.92294	0.73963	0.62737	0.91438	0.58337	0.7456	0.95523	0.77868	0.62076	1.0699	0.71118	0.73389	0.91281	1.0552	0.70427	0.69878	1.2621	0.66658
0.87236	NaN	NaN	0.51473	NaN	NaN	NaN	NaN	NaN	NaN	NaN	NaN	0.69249	NaN	NaN	NaN	NaN	NaN	NaN	NaN	NaN	NaN	0.68759	NaN	0.80979	NaN	NaN	NaN	NaN	NaN	0.80633	NaN	NaN	0.64749	NaN	NaN	0.76879	NaN	NaN	NaN	NaN	NaN	0.59942	NaN	NaN	NaN	NaN	NaN	NaN	NaN
NaN	NaN	NaN	NaN	NaN	NaN	NaN	NaN	NaN	NaN	NaN	NaN	NaN	NaN	NaN	0.99342	NaN	NaN	NaN	NaN	NaN	NaN	NaN	NaN	0.63928	NaN	NaN	NaN	NaN	NaN	NaN	NaN	NaN	NaN	NaN	NaN	NaN	NaN	NaN	NaN	NaN	NaN	NaN	NaN	NaN	NaN	NaN	NaN	NaN	NaN
NaN	NaN	NaN	NaN	NaN	NaN	NaN	NaN	NaN	NaN	NaN	NaN	NaN	NaN	NaN	NaN	NaN	NaN	NaN	NaN	NaN	NaN	NaN	NaN	NaN	NaN	NaN	NaN	NaN	NaN	NaN	NaN	NaN	NaN	NaN	NaN	NaN	NaN	NaN	NaN	NaN	NaN	NaN	NaN	NaN	NaN	NaN	NaN	NaN	NaN
0.69135	0.56458	NaN	0.6338	0.69293	NaN	0.25521	0.59451	NaN	0.70471	0.49283	NaN	NaN	0.45691	NaN	0.82952	0.60386	NaN	NaN	0.6014	NaN	NaN	0.77741	NaN	0.6395	0.83664	NaN	0.49239	0.90709	NaN	0.95766	0.82241	NaN	0.80216	NaN	NaN	NaN	0.60148	NaN	NaN	NaN	NaN	NaN	0.93192	NaN	0.95596	NaN	NaN	NaN	NaN
NaN	NaN	NaN	NaN	NaN	NaN	NaN	NaN	NaN	NaN	NaN	NaN	NaN	NaN	NaN	NaN	NaN	NaN	NaN	NaN	NaN	NaN	NaN	NaN	NaN	NaN	NaN	NaN	NaN	NaN	NaN	NaN	NaN	NaN	NaN	NaN	NaN	NaN	NaN	NaN	NaN	NaN	NaN	NaN	NaN	NaN	NaN	NaN	NaN	NaN
NaN	0.83635	NaN	NaN	NaN	NaN	0.2923	0.92275	0.87613	0.81391	NaN	0.98441	NaN	NaN	NaN	0.86745	0.67221	NaN	0.74265	0.63736	NaN	NaN	0.77366	NaN	NaN	NaN	NaN	0.76744	NaN	NaN	0.66477	NaN	NaN	NaN	NaN	NaN	NaN	0.85628	NaN	0.69817	NaN	NaN	NaN	NaN	NaN	NaN	NaN	NaN	NaN	NaN
NaN	NaN	NaN	NaN	NaN	NaN	NaN	NaN	NaN	NaN	NaN	NaN	NaN	NaN	NaN	NaN	NaN	NaN	NaN	NaN	NaN	NaN	NaN	NaN	NaN	NaN	NaN	NaN	NaN	NaN	NaN	NaN	NaN	NaN	NaN	NaN	NaN	NaN	NaN	NaN	NaN	NaN	NaN	NaN	NaN	NaN	NaN	NaN	NaN	NaN
0.94906	0.85687	0.96174	0.64026	0.7743	1.2219	0.38905	0.79041	0.97791	0.8543	0.71659	0.92737	0.69071	0.70585	0.92624	0.81188	0.69757	1.0947	0.62932	0.59873	0.82956	0.65501	0.71788	0.92801	0.75929	0.77356	1.0259	0.69676	0.61842	0.89121	0.81503	0.78153	0.8245	0.75801	0.57734	0.77539	0.6372	0.73419	0.90084	0.81685	0.63417	1.153	0.70523	0.60501	0.95807	1.004	0.75908	0.5873	1.0526	0.77864
0.94416	0.67093	1.006	0.7502	0.66497	1.0926	0.32074	0.49428	0.84022	0.87767	0.85192	0.68579	0.58901	0.51101	0.91537	0.93856	0.44933	0.76896	0.69731	NaN	0.91789	0.91163	0.68394	0.74284	0.77236	0.58347	0.55437	0.81802	0.66634	0.68061	0.73769	0.59198	0.70281	0.91457	0.55319	0.73698	0.7695	0.57575	0.75738	0.81582	0.62776	0.82782	0.75479	0.68373	0.75528	0.9344	0.51499	0.60075	0.96624	0.75841
NaN	NaN	NaN	NaN	NaN	NaN	NaN	NaN	NaN	NaN	NaN	NaN	NaN	NaN	NaN	NaN	NaN	NaN	NaN	NaN	NaN	NaN	NaN	NaN	NaN	NaN	NaN	NaN	NaN	NaN	NaN	NaN	NaN	NaN	NaN	NaN	NaN	NaN	NaN	NaN	NaN	NaN	NaN	NaN	NaN	NaN	NaN	NaN	NaN	NaN
NaN	NaN	NaN	NaN	NaN	NaN	NaN	NaN	NaN	3.0202	NaN	NaN	NaN	NaN	NaN	NaN	NaN	NaN	NaN	NaN	NaN	NaN	NaN	NaN	NaN	NaN	NaN	NaN	NaN	NaN	NaN	NaN	NaN	NaN	NaN	NaN	NaN	NaN	NaN	NaN	NaN	NaN	NaN	NaN	NaN	NaN	NaN	NaN	NaN	NaN
0.8755	0.62786	1.0683	0.61159	0.63316	1.1877	0.36997	0.57653	0.8829	0.71388	0.61199	0.77922	0.61695	0.54398	0.89279	0.91152	0.53762	0.83727	0.69542	0.50657	0.87072	0.70225	0.5665	0.9065	0.71688	0.55096	0.69329	0.69392	0.59294	0.70982	0.78631	0.64762	0.8967	0.6934	0.66314	0.90644	0.62131	0.63751	0.86434	0.78642	0.65458	0.92525	0.7805	0.59588	0.72714	0.86079	0.69862	0.57664	1.1026	0.72385
NaN	NaN	NaN	NaN	NaN	NaN	NaN	NaN	NaN	NaN	NaN	NaN	NaN	NaN	NaN	NaN	NaN	NaN	NaN	NaN	NaN	NaN	NaN	NaN	NaN	NaN	NaN	NaN	NaN	NaN	NaN	NaN	NaN	NaN	NaN	NaN	NaN	NaN	NaN	NaN	NaN	NaN	NaN	NaN	NaN	NaN	NaN	NaN	NaN	NaN
1.0708	0.78442	1.0734	NaN	0.91764	NaN	0.34585	0.749	0.97105	1.0513	0.6945	1.1008	0.65691	0.72005	1.048	0.86064	0.67597	1.2015	0.73263	NaN	NaN	0.91886	0.82308	0.8241	0.84663	0.75054	NaN	0.79842	0.64473	0.9533	1.0487	0.91845	1.0456	1.1025	0.5691	1.0735	0.65958	0.78446	1.2407	0.80039	0.6416	1.262	0.87942	0.76693	0.98096	1.1082	NaN	0.69211	1.6105	0.6988
NaN	NaN	NaN	NaN	NaN	NaN	NaN	NaN	NaN	NaN	NaN	NaN	NaN	NaN	NaN	NaN	NaN	NaN	NaN	NaN	NaN	NaN	NaN	NaN	NaN	NaN	NaN	NaN	NaN	NaN	NaN	NaN	NaN	NaN	NaN	NaN	NaN	NaN	NaN	NaN	NaN	NaN	NaN	NaN	NaN	NaN	NaN	NaN	NaN	NaN
0.69398	0.8575	0.95315	0.67121	0.65469	1.0441	0.53467	0.72508	NaN	0.54192	0.72866	NaN	NaN	0.6012	NaN	NaN	0.57396	0.73601	NaN	0.54443	0.98744	NaN	0.71466	0.88024	0.95468	0.75438	NaN	0.88333	0.52059	1.0349	0.94653	0.74624	NaN	0.74458	0.62697	NaN	0.54372	0.85575	NaN	0.80927	NaN	1.9549	0.82379	0.7703	0.99967	1.0572	0.63083	0.76183	1.3603	0.68989
NaN	NaN	NaN	NaN	NaN	NaN	NaN	NaN	NaN	NaN	NaN	NaN	NaN	NaN	NaN	NaN	NaN	NaN	NaN	0.43043	NaN	NaN	NaN	NaN	NaN	NaN	NaN	NaN	NaN	NaN	NaN	NaN	NaN	NaN	NaN	NaN	NaN	NaN	NaN	NaN	NaN	NaN	NaN	NaN	NaN	NaN	NaN	NaN	NaN	NaN
NaN	NaN	NaN	NaN	NaN	NaN	NaN	NaN	NaN	NaN	NaN	NaN	NaN	NaN	NaN	NaN	NaN	NaN	NaN	NaN	NaN	NaN	NaN	NaN	NaN	NaN	NaN	NaN	NaN	NaN	NaN	NaN	NaN	NaN	NaN	NaN	NaN	NaN	NaN	NaN	NaN	NaN	NaN	NaN	NaN	NaN	NaN	NaN	NaN	NaN
0.89175	0.73121	NaN	0.61976	0.73707	NaN	0.40959	0.68814	0.62296	0.73245	0.67609	0.94639	0.64438	0.78107	NaN	0.89283	0.66591	0.93049	0.73828	0.63096	NaN	0.53861	0.73772	1.1893	0.78059	0.70001	1.0498	0.77325	0.68139	0.87819	0.87739	0.88522	0.70357	0.85457	NaN	0.76461	0.64849	0.8914	0.98762	0.85859	NaN	1.1861	0.7796	NaN	0.95696	1.2043	0.65494	0.60446	NaN	NaN
NaN	NaN	NaN	NaN	NaN	NaN	NaN	NaN	NaN	NaN	NaN	NaN	NaN	NaN	NaN	NaN	NaN	NaN	NaN	NaN	NaN	NaN	NaN	NaN	NaN	NaN	NaN	NaN	NaN	NaN	NaN	NaN	NaN	NaN	NaN	NaN	NaN	NaN	NaN	NaN	NaN	NaN	NaN	NaN	NaN	NaN	NaN	NaN	NaN	NaN
0.82315	0.73094	0.98632	0.59658	0.65338	NaN	0.3691	0.58259	1.0164	0.65183	0.60617	0.90035	0.64018	0.53694	1.1545	0.88598	0.6325	1.162	0.67099	0.56924	0.78509	0.6363	0.71848	1.0692	0.71962	0.70944	0.90117	0.81469	0.58915	0.98589	0.7291	0.77131	1.0504	0.72176	0.56371	1.0402	0.63126	0.80356	0.94968	0.88576	0.62296	0.94289	0.7338	0.64144	NaN	0.99474	NaN	0.71438	0.99867	0.73349
NaN	NaN	NaN	NaN	NaN	NaN	NaN	NaN	NaN	NaN	NaN	NaN	NaN	NaN	NaN	NaN	NaN	NaN	NaN	NaN	NaN	NaN	NaN	NaN	NaN	NaN	NaN	NaN	NaN	NaN	NaN	NaN	NaN	NaN	NaN	NaN	NaN	NaN	NaN	NaN	NaN	NaN	NaN	NaN	NaN	NaN	NaN	NaN	NaN	NaN
NaN	NaN	NaN	NaN	NaN	NaN	NaN	NaN	NaN	NaN	NaN	NaN	NaN	NaN	NaN	NaN	NaN	NaN	NaN	NaN	NaN	NaN	NaN	NaN	NaN	NaN	NaN	NaN	NaN	NaN	NaN	NaN	NaN	NaN	NaN	NaN	NaN	NaN	NaN	NaN	NaN	NaN	NaN	NaN	NaN	NaN	NaN	NaN	NaN	NaN
1.0385	NaN	1.0115	0.92877	NaN	0.646	0.42668	NaN	0.93414	2.5469	0.65363	0.67467	0.9446	NaN	1.3094	NaN	NaN	0.8382	1.2108	0.69758	0.61026	2.1906	0.70702	1.3667	0.85811	NaN	0.63658	1.1851	NaN	0.88965	NaN	0.77079	0.85751	NaN	0.54322	0.90841	NaN	0.44704	NaN	NaN	0.37246	1.1842	0.71348	NaN	1.0306	0.53869	0.8707	1.226	1.5665	1.2419
NaN	NaN	NaN	NaN	0.51454	NaN	NaN	0.40037	NaN	NaN	NaN	NaN	NaN	NaN	NaN	NaN	NaN	NaN	NaN	NaN	NaN	NaN	NaN	NaN	NaN	NaN	NaN	NaN	NaN	NaN	0.62145	NaN	NaN	NaN	NaN	NaN	NaN	NaN	NaN	NaN	NaN	NaN	NaN	NaN	NaN	0.6534	NaN	NaN	NaN	NaN
0.93358	0.82112	0.8215	0.55396	0.85474	0.83113	0.35016	0.81247	0.69955	0.65034	0.4829	0.77577	0.52758	NaN	0.90556	0.79242	NaN	0.77062	0.70232	0.51868	0.76232	0.49126	NaN	0.9083	0.61893	0.59823	0.79814	0.58362	0.58335	0.74038	0.65532	NaN	0.72557	0.68411	0.75182	NaN	0.58445	NaN	NaN	0.76479	0.65303	0.82352	0.78387	0.74947	0.83859	NaN	0.92217	0.94674	1.0123	0.57605
NaN	NaN	NaN	NaN	NaN	NaN	NaN	NaN	NaN	NaN	NaN	NaN	NaN	NaN	NaN	NaN	NaN	NaN	NaN	NaN	NaN	NaN	NaN	NaN	NaN	NaN	NaN	NaN	NaN	NaN	NaN	NaN	NaN	NaN	NaN	NaN	NaN	NaN	NaN	NaN	NaN	NaN	NaN	NaN	NaN	NaN	NaN	NaN	NaN	NaN
0.85072	0.78335	NaN	0.7819	0.80201	NaN	0.42132	0.71502	NaN	0.48888	0.61366	NaN	0.92633	0.75089	0.8923	0.83719	0.67551	NaN	0.87928	0.62431	NaN	0.68658	0.61957	NaN	0.71496	0.68607	NaN	0.67078	0.51814	NaN	NaN	0.7638	NaN	0.70888	0.71815	NaN	0.64946	0.77092	0.7299	0.81504	0.49861	NaN	0.50879	0.79641	NaN	1.3979	0.52617	0.73759	NaN	0.71973
0.77296	0.87085	NaN	NaN	0.80338	NaN	NaN	NaN	NaN	0.76168	NaN	NaN	0.66397	0.8545	NaN	0.94619	NaN	NaN	NaN	NaN	NaN	NaN	NaN	NaN	0.77338	NaN	NaN	NaN	0.55954	NaN	NaN	NaN	NaN	0.73537	NaN	NaN	0.42758	NaN	NaN	0.79629	NaN	NaN	NaN	NaN	NaN	1.1447	NaN	NaN	NaN	NaN
NaN	NaN	NaN	NaN	NaN	NaN	NaN	NaN	NaN	NaN	NaN	NaN	NaN	NaN	NaN	NaN	NaN	NaN	NaN	NaN	NaN	NaN	NaN	NaN	NaN	NaN	NaN	NaN	NaN	NaN	NaN	NaN	NaN	NaN	NaN	NaN	NaN	NaN	NaN	NaN	NaN	NaN	NaN	NaN	NaN	NaN	NaN	NaN	NaN	NaN
1.6518	NaN	NaN	0.84547	NaN	1.1436	NaN	NaN	1.3385	1.0549	NaN	NaN	0.78667	NaN	1.0132	1.3443	NaN	0.88856	0.93941	NaN	NaN	1.0809	NaN	0.98545	1.1214	NaN	0.82402	NaN	NaN	NaN	0.4572	NaN	NaN	NaN	NaN	1.0255	NaN	NaN	0.82272	1.6495	NaN	NaN	NaN	1.492	1.0466	NaN	0.7548	NaN	NaN	NaN
NaN	NaN	NaN	NaN	NaN	NaN	NaN	NaN	NaN	NaN	NaN	NaN	NaN	NaN	NaN	NaN	NaN	NaN	NaN	0.61193	NaN	NaN	NaN	NaN	NaN	NaN	NaN	NaN	NaN	NaN	NaN	NaN	NaN	NaN	NaN	NaN	NaN	NaN	NaN	NaN	NaN	NaN	NaN	NaN	NaN	NaN	NaN	NaN	NaN	NaN
NaN	NaN	NaN	NaN	NaN	NaN	NaN	NaN	NaN	NaN	NaN	NaN	NaN	NaN	NaN	NaN	NaN	NaN	NaN	NaN	NaN	NaN	NaN	NaN	NaN	NaN	NaN	NaN	NaN	NaN	NaN	NaN	NaN	NaN	NaN	NaN	NaN	NaN	NaN	NaN	NaN	NaN	NaN	NaN	NaN	NaN	NaN	NaN	NaN	NaN
NaN	NaN	NaN	NaN	NaN	NaN	NaN	NaN	NaN	NaN	NaN	NaN	NaN	NaN	NaN	NaN	NaN	NaN	NaN	NaN	NaN	NaN	NaN	NaN	NaN	NaN	NaN	NaN	NaN	NaN	NaN	NaN	NaN	NaN	NaN	NaN	NaN	NaN	NaN	NaN	NaN	NaN	NaN	NaN	NaN	NaN	NaN	NaN	NaN	NaN
0.87914	0.76395	1.0154	0.59804	0.78321	1.168	0.37748	0.63644	0.83429	0.68569	0.62665	0.90006	0.61028	0.66129	0.91233	0.81243	0.61998	1.0425	0.70658	0.59725	0.94497	0.60712	0.69621	1.1006	0.73171	0.68333	0.96019	0.71127	0.61523	0.84393	0.78211	0.73849	0.93823	0.737	0.64826	0.98781	0.58864	0.68809	1.0715	0.79479	0.64479	1.1572	0.72174	0.7085	0.94272	1.0613	0.73885	0.69529	1.3128	0.71862
0.87298	0.69896	NaN	0.66952	0.78442	NaN	0.44995	0.73235	NaN	0.72924	NaN	0.99145	0.73818	0.70278	NaN	0.74154	0.62561	NaN	0.69285	0.51006	NaN	0.75849	0.75555	1.2216	0.71749	0.84262	0.84408	0.8076	0.6777	0.7606	0.81736	0.68202	NaN	0.85688	0.90135	0.95137	0.72851	0.79676	1.0634	0.79823	0.77246	1.1167	0.86018	1.3057	1.2291	0.97208	NaN	0.64688	1.5569	1.0663
0.8223	1.2929	NaN	0.82696	0.96636	1.045	0.67913	1.1774	1.1833	1.0926	NaN	NaN	1.6261	1.0731	NaN	0.74908	0.91538	NaN	0.77255	NaN	NaN	0.77281	0.97786	1.0929	1.0094	1.2164	0.86464	0.99818	0.66385	0.88053	0.97323	1.0384	NaN	0.8689	0.61189	NaN	0.748	NaN	1.0402	NaN	0.76893	0.97267	1.3322	NaN	NaN	1.0881	0.7712	1.0345	NaN	0.82304
0.90095	0.98463	0.84916	0.6346	1.1042	1.1874	0.33877	0.55075	0.78458	1.0405	0.53736	0.84782	0.47306	0.49393	1.076	0.82204	NaN	0.83244	0.73633	0.54435	0.88283	1.1425	0.58903	1.0362	0.69603	0.48339	0.66624	0.60311	0.50112	0.768	0.83225	0.58537	0.92888	0.80968	0.64711	0.9718	0.78819	0.75218	0.71977	0.92904	0.66267	0.87738	0.68028	0.56202	0.7458	0.68679	0.65354	0.68061	1.2992	0.63292
0.54283	0.84629	NaN	0.47312	0.95809	NaN	NaN	NaN	NaN	NaN	0.79156	NaN	NaN	0.69156	NaN	NaN	NaN	NaN	NaN	NaN	NaN	NaN	NaN	NaN	NaN	NaN	NaN	NaN	NaN	NaN	NaN	1.0266	NaN	0.77491	NaN	NaN	NaN	0.57128	NaN	NaN	NaN	NaN	0.67344	NaN	NaN	NaN	NaN	1.0963	NaN	NaN
NaN	0.54714	NaN	NaN	NaN	NaN	NaN	0.79882	NaN	NaN	NaN	NaN	NaN	NaN	NaN	NaN	NaN	NaN	NaN	NaN	NaN	NaN	1.0424	NaN	NaN	NaN	NaN	NaN	NaN	NaN	NaN	NaN	NaN	NaN	0.53567	NaN	NaN	NaN	NaN	NaN	NaN	NaN	NaN	NaN	NaN	NaN	NaN	NaN	NaN	NaN
0.99928	0.90063	NaN	0.99524	0.61483	NaN	0.3744	0.9134	NaN	0.90202	0.70058	NaN	0.63534	0.84464	NaN	0.8331	NaN	NaN	0.90974	0.72678	NaN	0.82175	NaN	NaN	0.77887	1.0961	NaN	0.72271	0.85037	NaN	0.79554	0.85665	NaN	0.83815	0.55456	NaN	0.76901	1.2474	NaN	0.83206	1.0575	1.0429	0.8813	1.0705	NaN	1.2563	NaN	0.85363	NaN	0.98991
NaN	NaN	NaN	NaN	NaN	NaN	NaN	NaN	NaN	NaN	NaN	NaN	NaN	NaN	NaN	NaN	NaN	NaN	NaN	NaN	NaN	NaN	NaN	NaN	NaN	NaN	NaN	NaN	NaN	NaN	NaN	NaN	NaN	NaN	NaN	NaN	NaN	NaN	NaN	NaN	NaN	NaN	NaN	NaN	NaN	NaN	NaN	NaN	NaN	NaN
0.57155	0.89356	NaN	NaN	NaN	1.361	NaN	0.74776	NaN	0.5665	NaN	NaN	0.55474	0.57331	NaN	0.69221	NaN	NaN	NaN	NaN	NaN	NaN	0.70289	NaN	0.55572	NaN	NaN	0.58245	0.59285	NaN	0.71628	0.79334	NaN	0.68544	NaN	NaN	NaN	NaN	NaN	0.68816	0.89019	NaN	NaN	NaN	NaN	NaN	NaN	1.0592	NaN	1.2205
NaN	NaN	NaN	NaN	NaN	NaN	NaN	NaN	NaN	NaN	NaN	NaN	NaN	NaN	NaN	NaN	NaN	NaN	0.72783	NaN	NaN	1.0122	NaN	NaN	NaN	NaN	NaN	1.0439	NaN	NaN	NaN	NaN	NaN	NaN	NaN	NaN	0.78136	NaN	NaN	NaN	NaN	NaN	0.89051	NaN	NaN	NaN	NaN	NaN	NaN	NaN
NaN	NaN	NaN	NaN	NaN	NaN	NaN	NaN	NaN	NaN	NaN	NaN	NaN	NaN	NaN	NaN	NaN	NaN	NaN	0.61756	NaN	NaN	NaN	NaN	NaN	NaN	NaN	NaN	NaN	NaN	0.84541	NaN	NaN	0.82827	NaN	NaN	NaN	NaN	NaN	0.6847	0.62384	NaN	NaN	NaN	NaN	NaN	NaN	NaN	NaN	0.89106
0.90144	0.72933	1.0065	0.63386	0.73089	1.1617	0.41615	0.7133	0.95395	0.70822	0.63869	0.91442	0.67888	0.71614	0.8995	0.92693	0.65651	1.0209	0.77362	0.67331	0.8609	0.66468	0.73089	1.0882	0.80841	0.75307	0.92457	0.73213	0.62735	0.92723	0.83809	0.8351	0.88243	0.77755	0.6626	0.9853	0.65532	0.73797	1.0441	0.8229	0.61505	1.0724	0.79618	0.68522	0.99339	1.0544	0.70817	0.64687	1.2867	0.65934
0.64602	0.64258	NaN	0.50647	NaN	1.6036	NaN	0.61998	NaN	NaN	0.66825	1.0816	0.54524	0.74165	NaN	NaN	0.56336	NaN	1.1099	0.62998	0.94187	NaN	0.64373	NaN	0.58273	0.71873	NaN	0.9638	NaN	NaN	1.0119	0.68338	0.97631	1.1135	0.32505	NaN	NaN	0.6446	NaN	0.81509	NaN	NaN	NaN	0.3701	NaN	NaN	NaN	0.34387	NaN	0.43555
0.86269	0.78617	0.94691	0.62821	0.74367	1.1441	0.41824	0.72077	0.97697	0.74304	0.60868	0.81556	0.6503	0.63199	0.80166	0.84075	0.62731	0.88397	0.7233	0.59841	0.97076	0.62441	0.76405	0.9545	0.77939	0.70597	0.80047	0.72559	0.5749	0.67719	0.8371	0.8054	0.75497	0.7493	0.73503	0.94783	0.58861	0.74088	0.87166	0.81983	0.65175	1.0161	0.7302	0.69064	0.93931	1.0774	0.57392	0.66164	1.5193	0.71825
NaN	NaN	NaN	NaN	NaN	NaN	NaN	NaN	NaN	NaN	NaN	NaN	NaN	NaN	NaN	NaN	NaN	NaN	NaN	NaN	NaN	NaN	NaN	NaN	NaN	NaN	NaN	NaN	NaN	NaN	NaN	NaN	NaN	NaN	NaN	NaN	NaN	NaN	NaN	NaN	NaN	NaN	NaN	NaN	NaN	NaN	NaN	NaN	NaN	NaN
0.78201	NaN	NaN	NaN	NaN	1.1166	NaN	NaN	NaN	NaN	NaN	NaN	NaN	NaN	NaN	NaN	NaN	1.0827	NaN	NaN	NaN	0.7624	0.88179	NaN	NaN	NaN	NaN	NaN	NaN	NaN	NaN	0.86229	NaN	NaN	NaN	NaN	NaN	NaN	NaN	NaN	NaN	NaN	NaN	NaN	NaN	NaN	NaN	NaN	NaN	NaN
NaN	0.79771	NaN	0.55518	0.75592	NaN	0.32947	NaN	NaN	NaN	NaN	NaN	NaN	NaN	NaN	0.77591	NaN	NaN	NaN	NaN	NaN	0.49737	NaN	NaN	0.72044	NaN	NaN	0.6134	NaN	NaN	0.68274	NaN	NaN	NaN	NaN	NaN	0.51365	NaN	NaN	NaN	NaN	NaN	NaN	NaN	NaN	NaN	NaN	NaN	NaN	NaN
0.94554	NaN	NaN	0.63546	0.68697	NaN	NaN	0.54125	NaN	0.92132	0.62388	0.94884	0.60176	0.72376	NaN	0.94313	0.63515	NaN	0.85833	0.6752	NaN	0.7947	0.76068	NaN	0.73696	0.78139	NaN	0.78924	NaN	NaN	0.88628	0.8761	NaN	0.84757	0.52738	NaN	0.74756	NaN	NaN	NaN	0.61384	NaN	NaN	0.75361	NaN	1.0723	NaN	0.63541	NaN	0.62986
0.81407	0.70471	NaN	0.74511	0.77062	1.17	0.46072	0.58959	NaN	0.62881	NaN	0.86153	NaN	0.8457	1.1614	NaN	NaN	1.0663	0.83301	0.70733	1.5484	NaN	0.89411	1.398	0.93111	NaN	NaN	0.82093	0.85551	0.89209	NaN	0.69199	NaN	0.99095	0.6458	1.4621	1.0163	NaN	1.054	1.1757	0.79604	NaN	1.1548	NaN	NaN	NaN	0.63641	NaN	1.4103	NaN
0.81199	0.73496	1.0893	0.74344	0.79454	0.83487	0.49367	0.71173	0.90478	0.86618	0.6557	0.94075	0.64225	0.69748	0.69427	1.2068	0.67783	0.91636	0.66114	0.66121	0.98555	0.92989	0.72433	0.91237	0.85351	0.65457	0.77491	0.71154	0.62882	1.0214	0.76156	0.85594	0.89705	0.84852	0.70136	0.7741	0.69437	0.77872	0.80781	0.8635	0.55603	0.98396	0.69465	0.69036	0.5257	1.023	0.65913	0.72523	1.2619	0.70744
1.069	NaN	NaN	0.47154	NaN	NaN	NaN	NaN	NaN	NaN	NaN	NaN	1.3421	NaN	NaN	NaN	NaN	NaN	0.98254	NaN	NaN	NaN	NaN	NaN	NaN	NaN	NaN	0.85585	NaN	NaN	NaN	NaN	NaN	NaN	NaN	NaN	NaN	NaN	NaN	NaN	NaN	NaN	NaN	NaN	NaN	NaN	NaN	NaN	NaN	NaN
0.88075	0.82133	0.97424	0.71413	0.71499	1.036	0.38783	0.61558	0.95528	0.82183	0.62101	0.99208	0.624	0.60324	0.95049	0.87654	0.66922	0.91167	0.80152	0.67387	0.87142	0.7235	0.72484	0.95358	0.78356	0.7467	0.70932	0.78678	0.63318	0.74431	0.85323	0.83675	1.1163	0.76639	0.63779	0.90465	0.72319	0.76377	0.96733	0.77025	0.55909	1.1129	0.79846	0.75148	0.89296	1.0356	0.74523	0.68454	1.004	0.68778
0.92161	0.67771	1.0219	0.64329	0.63986	1.1549	0.29504	0.5314	0.755	1.1096	0.60316	0.8554	0.48103	0.56405	0.86014	0.72537	0.56634	0.86229	0.61027	0.74889	0.77019	1.091	0.59576	0.93036	0.57284	0.54345	0.74082	0.54559	0.51732	0.73346	0.67953	0.69412	0.88947	0.81194	0.42537	0.90503	0.74891	0.60648	0.899	0.66618	0.5792	0.9533	0.65038	0.54776	0.77303	0.94529	0.59236	0.53697	1.1403	0.53894
NaN	NaN	NaN	NaN	NaN	NaN	NaN	NaN	NaN	NaN	NaN	NaN	NaN	NaN	NaN	NaN	NaN	NaN	NaN	NaN	NaN	NaN	NaN	NaN	NaN	NaN	NaN	NaN	NaN	NaN	NaN	NaN	NaN	NaN	NaN	NaN	NaN	NaN	NaN	NaN	NaN	NaN	NaN	NaN	NaN	NaN	NaN	NaN	NaN	NaN
0.87971	0.85826	1.0967	0.68646	0.62406	1.1981	0.38682	0.58117	0.78768	0.90722	0.70702	0.93398	0.59908	0.63411	0.86151	0.77258	0.72283	1.0682	0.70955	0.6969	0.79003	0.95166	0.66863	1.1009	0.75222	0.63484	0.83927	0.74905	0.58958	0.7928	0.61944	0.68059	0.9721	0.7127	0.56161	0.94136	0.82081	0.59788	0.93894	0.8067	0.66951	1.0736	0.78588	0.67718	0.88297	1.0566	0.75447	0.62178	1.2064	0.62779
0.94947	NaN	NaN	0.79933	1.0377	NaN	NaN	0.99311	NaN	0.85044	0.69433	NaN	0.79449	0.75982	NaN	1.0163	0.80716	NaN	NaN	NaN	NaN	1.1024	0.91259	NaN	0.77466	1.5138	NaN	0.80714	NaN	NaN	0.82771	1.0801	NaN	0.79186	NaN	NaN	0.86324	NaN	NaN	0.78561	1.0389	NaN	0.93696	1.0793	NaN	1.6745	NaN	1.0055	NaN	1.1371
NaN	NaN	0.94324	NaN	NaN	1.3781	NaN	NaN	1.4833	1.8239	0.79733	NaN	NaN	NaN	1.1017	NaN	NaN	NaN	NaN	NaN	0.93081	NaN	NaN	1.0924	NaN	NaN	NaN	NaN	NaN	NaN	0.60613	NaN	1.1073	NaN	NaN	NaN	NaN	NaN	NaN	NaN	NaN	0.9381	NaN	NaN	NaN	NaN	NaN	NaN	NaN	NaN
0.86402	0.66649	0.95928	0.64448	0.62043	1.0763	0.28029	0.63201	0.88026	0.96303	0.56877	0.85135	0.49579	0.47463	0.77038	0.80104	0.57591	0.98233	0.55284	0.65753	1.0426	1.2142	0.52707	0.88555	0.50614	0.45455	0.73462	0.56406	0.49129	0.8175	0.59281	0.55907	0.82877	0.71771	0.5523	0.87826	0.81043	0.50008	0.84175	0.67227	0.55871	0.98075	0.70073	0.58959	0.82657	0.92409	0.65732	0.60862	1.2005	0.63741
NaN	NaN	NaN	NaN	NaN	NaN	NaN	NaN	NaN	NaN	NaN	NaN	NaN	NaN	NaN	NaN	NaN	NaN	NaN	NaN	NaN	NaN	NaN	NaN	NaN	NaN	NaN	NaN	NaN	NaN	NaN	NaN	NaN	NaN	NaN	NaN	NaN	NaN	NaN	NaN	NaN	NaN	0.79984	NaN	NaN	NaN	NaN	NaN	NaN	NaN
0.95782	0.72277	NaN	0.47243	0.67209	NaN	0.35495	0.48583	NaN	0.72431	0.55295	NaN	0.66384	0.47191	NaN	0.95328	0.56203	0.90442	0.58361	NaN	NaN	0.6159	0.58713	0.91464	0.80933	NaN	0.67474	0.72148	0.63199	0.81667	0.792	NaN	NaN	0.78009	NaN	NaN	0.66157	NaN	NaN	0.80123	0.32801	NaN	0.75368	0.40624	NaN	NaN	NaN	0.64236	1.3106	0.65162
NaN	NaN	NaN	NaN	NaN	NaN	NaN	NaN	NaN	NaN	NaN	NaN	NaN	NaN	NaN	NaN	NaN	NaN	NaN	NaN	NaN	NaN	NaN	NaN	NaN	NaN	NaN	NaN	NaN	NaN	NaN	NaN	NaN	NaN	NaN	NaN	NaN	NaN	NaN	NaN	NaN	NaN	NaN	NaN	NaN	NaN	NaN	NaN	NaN	NaN
0.8434	0.70604	0.94056	0.80025	0.95376	1.221	0.41018	0.69217	0.81716	0.79816	0.69118	0.74663	0.73571	0.92519	0.98987	0.88129	0.71747	0.91367	0.78389	0.59269	0.88129	0.68077	0.7045	0.96254	0.85682	0.71856	0.67739	0.74592	0.59592	0.76293	0.95677	0.80535	0.85267	0.73759	0.70287	0.95238	0.64286	0.69084	0.8937	0.74719	0.58508	0.92326	0.74194	0.69541	1.0007	1.0014	0.76958	0.75402	1.1291	0.64252
0.88754	0.75303	1.0876	0.72501	0.84869	0.9787	0.47768	0.63366	0.81372	0.64014	0.55888	0.80267	0.59529	0.62085	0.975	0.79701	0.6987	0.95236	0.77873	0.61334	0.87748	0.61291	0.72202	0.95332	0.78639	0.61056	0.75341	0.70324	0.55624	0.73525	0.71887	0.84424	0.93851	0.76847	0.63073	0.92983	0.56321	0.74351	0.85525	0.78605	0.6133	0.93624	0.81396	0.62773	0.85924	0.98317	0.82195	0.66715	1.3432	0.61135
0.73887	0.53944	NaN	0.64551	0.65995	0.88561	0.46888	0.78668	0.95791	0.97604	0.84834	0.71894	0.57899	0.87404	NaN	0.77856	0.52284	1.1433	0.81041	0.89751	NaN	0.99328	NaN	0.84003	0.69045	NaN	0.55549	0.83107	NaN	NaN	0.60915	NaN	NaN	0.81855	0.75821	0.94435	0.82531	0.932	0.7744	0.81473	0.82022	0.88109	0.95844	NaN	NaN	NaN	0.57516	NaN	NaN	0.8654
0.81022	0.76394	1.0002	0.63231	0.72499	1.1577	0.40988	0.67134	0.81149	0.73982	0.63517	0.89165	0.62721	0.70534	1.0265	0.81982	0.66304	0.95003	0.75286	0.58889	0.87718	0.65398	0.67512	0.92292	0.74827	0.74168	0.9592	0.72734	0.5906	0.87437	0.75064	0.73575	0.87059	0.69044	0.59553	1.0584	0.60602	0.69095	0.9623	0.73789	0.58851	1.0596	0.72027	0.6909	1.0119	1.1251	0.8038	0.67183	1.5997	0.64845
0.91182	0.92599	1.0481	0.6357	0.8414	1.1466	0.41519	0.8074	0.90577	0.70961	0.78065	1.0207	0.63366	0.74944	0.90567	0.90999	0.76987	0.75768	0.77955	0.73375	0.79226	0.58689	0.75997	0.8759	0.71871	0.71416	0.71172	0.79557	0.72072	0.58061	0.7959	0.85577	0.99867	0.75037	0.71687	0.91576	0.6038	0.88054	0.78635	0.79775	0.59093	0.78501	0.74491	0.76207	0.86891	1.0793	0.7252	0.66667	1.2793	0.78103
NaN	NaN	NaN	NaN	NaN	NaN	NaN	NaN	NaN	NaN	NaN	NaN	NaN	NaN	NaN	NaN	NaN	NaN	NaN	NaN	NaN	NaN	NaN	NaN	NaN	NaN	NaN	NaN	NaN	NaN	NaN	NaN	NaN	NaN	NaN	NaN	NaN	NaN	NaN	NaN	NaN	NaN	NaN	NaN	NaN	NaN	NaN	NaN	NaN	NaN
0.82728	0.6595	1.0328	0.59968	0.73075	1.2351	0.43474	0.67541	0.92296	0.67616	0.5932	0.83977	0.63141	0.63856	0.88006	0.83063	0.58927	1.0395	0.89859	0.50471	0.89481	0.68491	0.57937	1.0889	0.75665	0.72243	0.90199	0.71367	0.55451	0.89311	0.74353	0.73953	0.8763	0.69867	0.70955	1.064	0.51143	0.7199	0.92976	0.71041	0.60059	0.93887	0.73955	0.60871	0.9922	1.0327	0.73651	0.71	1.4698	0.70995
NaN	NaN	NaN	NaN	NaN	NaN	NaN	NaN	NaN	NaN	NaN	NaN	NaN	NaN	NaN	NaN	NaN	NaN	NaN	NaN	NaN	NaN	NaN	NaN	NaN	NaN	NaN	NaN	NaN	NaN	NaN	NaN	NaN	NaN	NaN	NaN	NaN	NaN	NaN	NaN	NaN	NaN	NaN	NaN	NaN	NaN	NaN	NaN	NaN	NaN
NaN	0.54957	1.3676	NaN	NaN	NaN	NaN	NaN	NaN	NaN	NaN	NaN	NaN	NaN	NaN	NaN	NaN	NaN	NaN	NaN	NaN	NaN	0.56361	NaN	NaN	0.61047	NaN	NaN	NaN	NaN	NaN	NaN	NaN	NaN	NaN	NaN	NaN	NaN	NaN	NaN	NaN	NaN	NaN	0.64609	NaN	NaN	NaN	NaN	NaN	0.59959
NaN	NaN	0.9847	NaN	NaN	NaN	NaN	NaN	NaN	NaN	NaN	NaN	NaN	NaN	NaN	NaN	NaN	NaN	NaN	NaN	NaN	NaN	NaN	NaN	NaN	NaN	NaN	NaN	NaN	NaN	NaN	NaN	NaN	NaN	NaN	NaN	NaN	NaN	NaN	NaN	NaN	NaN	NaN	NaN	NaN	NaN	NaN	NaN	NaN	NaN
0.86423	0.9248	NaN	0.58739	0.93615	1.0959	0.3799	0.86433	NaN	0.75818	0.82625	NaN	0.5829	0.76735	0.96985	0.92891	0.5353	NaN	0.69147	0.49669	NaN	0.58716	0.67187	NaN	0.70084	0.91586	NaN	0.70709	0.7644	0.9025	0.95281	0.75774	NaN	0.75748	0.49718	NaN	0.54521	0.72215	NaN	0.65606	0.67283	NaN	0.64317	0.8129	NaN	0.96781	NaN	0.77089	NaN	0.9572
NaN	NaN	NaN	NaN	NaN	NaN	NaN	NaN	NaN	NaN	NaN	NaN	NaN	NaN	NaN	NaN	NaN	NaN	NaN	NaN	NaN	NaN	NaN	NaN	NaN	NaN	NaN	NaN	NaN	NaN	NaN	NaN	NaN	NaN	NaN	NaN	NaN	NaN	NaN	NaN	NaN	NaN	NaN	NaN	NaN	NaN	NaN	NaN	NaN	NaN
NaN	0.95717	NaN	NaN	0.80198	NaN	NaN	NaN	NaN	0.87674	0.72358	NaN	0.84849	NaN	NaN	NaN	NaN	1.0315	0.70835	0.67771	NaN	0.99788	0.71967	NaN	0.85331	0.73396	NaN	0.70985	0.79562	0.83266	0.94417	0.73176	NaN	NaN	0.60237	NaN	0.61586	0.6926	NaN	0.71959	0.63671	NaN	0.67792	0.78263	0.68721	1.0808	NaN	0.75938	NaN	0.73054
NaN	NaN	0.86108	NaN	NaN	1.047	NaN	NaN	NaN	NaN	NaN	NaN	NaN	NaN	1.0254	NaN	NaN	1.0359	NaN	NaN	NaN	NaN	NaN	NaN	NaN	NaN	NaN	NaN	NaN	NaN	NaN	NaN	NaN	NaN	5.9708	NaN	NaN	NaN	1.0049	NaN	NaN	1.068	NaN	NaN	NaN	NaN	0.69846	NaN	NaN	NaN
0.9022	0.77633	0.99395	0.73445	0.77911	NaN	0.44954	0.75739	NaN	0.68571	0.95284	0.86629	0.724	0.80449	NaN	0.96214	NaN	NaN	0.89162	0.74532	1.07	0.73925	0.70374	1.0947	0.84841	0.80798	NaN	0.77831	NaN	1.0611	0.80391	0.50858	0.98148	0.8871	NaN	NaN	0.69012	0.82511	1.1305	0.69664	NaN	1.066	0.81058	0.76792	1.1475	0.96977	NaN	0.72007	1.3986	NaN
NaN	NaN	NaN	NaN	NaN	NaN	NaN	NaN	NaN	NaN	NaN	NaN	NaN	NaN	NaN	NaN	NaN	NaN	NaN	NaN	NaN	NaN	NaN	NaN	NaN	NaN	NaN	NaN	NaN	NaN	NaN	NaN	NaN	NaN	NaN	NaN	NaN	NaN	NaN	NaN	NaN	NaN	NaN	NaN	NaN	NaN	NaN	NaN	NaN	NaN
0.91641	0.8233	1.0008	0.67742	0.75794	0.92151	0.354	0.53889	0.83847	0.76912	0.61748	0.75143	0.63334	0.72143	0.90818	0.86752	0.69185	1.0053	0.7107	0.61553	0.70277	0.62031	0.73796	0.96269	0.74051	0.73526	0.81663	0.7227	0.62166	0.7846	0.7495	0.77001	0.8517	0.7771	0.65365	1.0602	0.59885	0.88006	1.0304	0.79452	0.55699	0.98687	0.73227	0.71463	1.0138	1.1507	0.67007	0.76758	1.1372	0.65457
0.82071	0.77586	1.031	0.5902	0.87797	1.0714	0.36884	0.59116	0.90688	0.68065	0.57971	0.76421	0.5901	0.67501	0.82596	0.83361	0.60762	0.76491	0.74785	0.56627	0.73824	0.65592	0.79482	0.8041	0.72355	0.76913	0.77938	0.64946	0.66958	0.684	0.82152	0.88861	0.85933	0.62994	0.55525	0.91394	0.52664	0.71049	0.8537	0.6878	0.64531	0.95387	0.6284	0.76489	0.86777	1.019	0.76051	0.65065	1.2088	0.68444
0.96189	0.81261	1.1748	0.79469	0.8141	1.1438	0.6082	0.65232	0.85917	0.89985	0.74605	0.92989	0.58993	0.74268	0.95473	1.1043	0.6499	0.8637	0.87551	0.73875	0.88729	0.68025	0.77753	1.0023	0.8873	0.7029	0.66703	0.86136	0.64135	0.77941	0.91519	0.73669	1.0637	0.99913	0.57586	0.96127	0.69617	0.6854	0.77465	0.94182	0.62209	0.9438	0.92185	0.61852	0.99735	1.0369	0.72634	0.62035	1.2116	0.75005
0.95662	NaN	NaN	0.59868	NaN	NaN	0.36199	NaN	NaN	NaN	0.6399	NaN	0.62104	0.62483	NaN	0.89235	NaN	NaN	0.68373	NaN	0.60333	0.50807	NaN	NaN	0.72954	0.55002	NaN	0.64171	0.60116	NaN	0.78512	NaN	NaN	0.81336	0.94613	NaN	0.65639	NaN	NaN	0.68208	NaN	NaN	0.7384	0.75953	NaN	0.99947	NaN	NaN	NaN	NaN
0.91021	0.86377	0.99924	0.59756	0.90037	1.2672	0.37312	0.69543	1.0665	0.63647	0.69191	0.95492	0.65568	0.74078	0.94625	0.89151	0.64111	1.1252	0.69954	0.71156	0.91665	0.62322	0.73008	1.1105	0.77292	0.68676	1.0556	0.77198	0.71619	0.87951	0.85641	0.73358	0.96404	0.77429	0.45198	1.1115	0.66148	0.76268	1.1909	0.76803	0.60886	1.223	0.73262	0.68797	1.0501	1.0301	0.73845	0.66214	1.4869	0.65671
NaN	NaN	NaN	NaN	NaN	NaN	NaN	NaN	NaN	NaN	NaN	NaN	NaN	NaN	NaN	NaN	NaN	NaN	NaN	NaN	NaN	NaN	NaN	NaN	NaN	NaN	NaN	NaN	NaN	NaN	NaN	NaN	NaN	NaN	NaN	NaN	NaN	NaN	NaN	NaN	NaN	NaN	NaN	NaN	NaN	NaN	NaN	0.7892	NaN	NaN
0.91401	0.86132	0.97254	0.67123	0.8488	1.146	0.36647	0.8109	0.8956	0.65948	0.60008	0.79792	0.60119	0.71515	0.92388	0.75477	0.62202	0.92934	0.72076	0.60031	0.80808	0.64013	0.69331	0.96074	0.72441	0.67506	0.88726	0.72914	0.61766	0.72868	0.78491	0.7327	0.91558	0.73523	0.6533	0.93511	0.60518	0.69347	0.93947	0.79074	0.586	0.91888	0.79401	0.79007	0.99973	1.0539	0.74975	0.74951	1.1616	0.67439
NaN	NaN	NaN	NaN	NaN	NaN	NaN	NaN	NaN	NaN	NaN	NaN	NaN	NaN	NaN	NaN	NaN	NaN	NaN	NaN	NaN	NaN	NaN	NaN	NaN	NaN	NaN	NaN	NaN	NaN	NaN	NaN	NaN	NaN	NaN	NaN	NaN	NaN	NaN	NaN	NaN	NaN	NaN	NaN	NaN	NaN	NaN	NaN	NaN	NaN
0.89832	0.94788	1.2248	0.69049	0.81732	1.1397	0.45535	0.72489	1.018	1.1613	0.67004	1.0899	0.68505	0.64346	1.0129	0.89793	0.71032	1.3034	0.77072	0.57653	0.99847	1.1475	0.77162	1.2435	0.7241	0.94149	0.96649	0.69645	0.62315	0.68905	0.78926	0.8201	NaN	0.66341	0.7845	1.1164	0.58964	0.7808	1.0578	0.79149	0.41424	1.2356	0.71047	0.85931	0.73704	0.90493	0.74322	1.1535	2.261	0.66513
0.82858	NaN	NaN	NaN	NaN	NaN	NaN	NaN	NaN	NaN	NaN	NaN	NaN	NaN	NaN	NaN	NaN	NaN	NaN	NaN	NaN	NaN	NaN	NaN	NaN	NaN	NaN	NaN	NaN	NaN	NaN	NaN	NaN	NaN	NaN	NaN	NaN	NaN	NaN	NaN	NaN	NaN	NaN	NaN	NaN	NaN	NaN	NaN	NaN	NaN
NaN	NaN	1.1889	NaN	NaN	NaN	0.59497	0.87404	0.92656	0.8002	0.88482	1.3977	NaN	NaN	1.3305	1.1938	0.94593	1.0424	0.97719	1.3058	NaN	NaN	1.0057	1.2151	1.1499	1.0559	NaN	0.78444	NaN	1.4605	0.97319	1.0935	1.3629	NaN	NaN	NaN	NaN	1.0454	NaN	0.82958	0.7663	1.6651	0.69885	NaN	NaN	1.3645	NaN	0.79724	NaN	0.7895
NaN	NaN	NaN	NaN	NaN	NaN	NaN	NaN	NaN	NaN	NaN	NaN	NaN	NaN	NaN	NaN	NaN	NaN	NaN	NaN	NaN	NaN	NaN	NaN	NaN	NaN	NaN	NaN	NaN	NaN	NaN	NaN	NaN	NaN	NaN	NaN	NaN	NaN	NaN	NaN	NaN	NaN	NaN	NaN	NaN	NaN	NaN	NaN	NaN	NaN
0.73697	0.69546	NaN	NaN	0.85435	1.2628	0.46055	0.69429	NaN	0.79165	0.69026	NaN	0.69827	0.6789	NaN	0.79241	0.70693	NaN	0.61925	0.5631	0.9462	0.80119	0.75238	0.99856	0.7686	0.75265	NaN	0.72311	0.60659	NaN	0.75029	0.61469	NaN	0.76095	0.61917	NaN	0.79765	0.78642	NaN	0.75286	0.69626	NaN	0.65172	0.70267	NaN	0.98866	NaN	0.85012	2.1438	0.67907
NaN	NaN	NaN	NaN	NaN	NaN	NaN	NaN	NaN	NaN	NaN	NaN	NaN	NaN	NaN	NaN	NaN	NaN	NaN	NaN	NaN	NaN	NaN	NaN	NaN	NaN	NaN	NaN	NaN	NaN	0.79975	NaN	NaN	0.40314	NaN	NaN	NaN	NaN	NaN	NaN	NaN	NaN	NaN	NaN	NaN	NaN	NaN	NaN	NaN	NaN
0.86313	0.75623	NaN	0.52592	0.64576	NaN	0.46343	0.50186	NaN	0.70474	0.59401	NaN	0.71668	0.74037	NaN	0.8673	0.72179	NaN	0.65373	0.54454	NaN	0.58153	0.76064	NaN	0.69143	0.87821	NaN	0.73972	NaN	NaN	0.71697	1.014	NaN	0.6306	NaN	NaN	0.48339	0.56559	NaN	0.70208	0.55313	NaN	0.79256	0.64267	NaN	0.774	0.68514	0.61285	NaN	NaN
0.81603	NaN	NaN	0.68036	NaN	NaN	0.47864	NaN	NaN	NaN	NaN	NaN	0.72349	NaN	NaN	NaN	NaN	NaN	0.74736	NaN	NaN	0.63816	NaN	NaN	0.62287	NaN	NaN	NaN	NaN	NaN	NaN	NaN	NaN	NaN	NaN	NaN	0.6504	NaN	NaN	0.89599	NaN	NaN	0.62655	NaN	NaN	NaN	NaN	NaN	NaN	NaN
NaN	NaN	NaN	NaN	NaN	NaN	NaN	NaN	NaN	NaN	NaN	NaN	NaN	NaN	NaN	NaN	NaN	NaN	NaN	NaN	NaN	NaN	NaN	NaN	NaN	NaN	NaN	NaN	NaN	NaN	NaN	NaN	NaN	NaN	NaN	NaN	NaN	NaN	NaN	NaN	NaN	NaN	NaN	NaN	NaN	NaN	NaN	NaN	NaN	NaN
NaN	NaN	NaN	NaN	NaN	NaN	NaN	NaN	NaN	NaN	NaN	NaN	NaN	NaN	NaN	NaN	NaN	NaN	NaN	NaN	NaN	NaN	NaN	NaN	NaN	NaN	NaN	NaN	NaN	NaN	NaN	NaN	NaN	NaN	NaN	NaN	NaN	NaN	NaN	NaN	NaN	NaN	NaN	NaN	NaN	NaN	NaN	NaN	NaN	NaN
1.0408	0.70398	NaN	0.6853	0.82409	NaN	0.35594	0.63183	0.98562	0.80082	NaN	NaN	0.69689	0.47098	0.89652	0.84456	0.80543	1.3103	0.80273	NaN	NaN	0.74046	NaN	0.99496	1.1036	1.0838	0.78479	1.0707	0.56624	1	1.0119	0.81487	NaN	0.83887	0.6895	NaN	0.9606	0.75572	0.84122	NaN	0.64571	0.97336	0.91752	0.84702	0.82832	NaN	0.67397	0.97388	NaN	0.99165
1.0273	NaN	1.2427	0.78764	NaN	NaN	0.35875	0.81917	1.0112	1.4226	0.78223	0.84158	0.78128	0.94439	NaN	1.2109	1.0024	NaN	0.97557	0.8332	1.2184	1.3122	0.8307	NaN	0.96069	1.1739	NaN	0.88688	0.97092	0.85206	0.90638	0.97838	NaN	0.97187	0.62108	0.80106	0.59036	NaN	NaN	0.69576	NaN	0.84758	0.61245	NaN	0.76375	0.88041	0.62314	NaN	NaN	1.0148
0.55259	NaN	0.92013	NaN	NaN	NaN	NaN	NaN	NaN	0.69048	NaN	1.0626	NaN	NaN	NaN	NaN	NaN	NaN	NaN	NaN	NaN	NaN	NaN	NaN	NaN	NaN	NaN	NaN	NaN	NaN	NaN	NaN	NaN	0.33522	NaN	NaN	NaN	NaN	NaN	NaN	NaN	NaN	NaN	NaN	NaN	NaN	NaN	NaN	NaN	0.2262
0.85422	0.66966	1.0576	0.62938	0.81123	1.0058	0.39643	0.69062	0.74514	0.66115	0.66014	0.99629	0.55675	0.76174	0.85492	0.80322	0.70196	1.193	0.61898	0.62405	0.79829	0.50734	0.62694	1.0352	0.66185	0.72332	1.0722	0.67423	0.63297	0.94002	0.78866	0.80704	0.90713	0.75994	0.53644	1.0641	0.58701	0.82679	1.0783	0.72924	0.61544	1.1989	0.70327	0.68811	0.98927	1.1276	0.77569	0.65062	1.3531	0.49101
NaN	1.0221	NaN	NaN	NaN	NaN	NaN	NaN	NaN	NaN	NaN	NaN	NaN	NaN	NaN	NaN	NaN	NaN	NaN	NaN	NaN	NaN	NaN	NaN	NaN	NaN	NaN	NaN	NaN	NaN	NaN	NaN	NaN	NaN	NaN	NaN	NaN	NaN	NaN	NaN	NaN	NaN	NaN	0.89113	NaN	NaN	NaN	NaN	NaN	NaN
NaN	NaN	NaN	NaN	0.6074	NaN	NaN	0.6021	NaN	0.93127	0.62724	NaN	NaN	NaN	NaN	NaN	NaN	NaN	NaN	NaN	NaN	NaN	NaN	NaN	NaN	0.52039	NaN	NaN	NaN	NaN	0.69386	NaN	NaN	NaN	NaN	NaN	NaN	NaN	NaN	NaN	0.52269	NaN	NaN	NaN	NaN	NaN	NaN	NaN	NaN	NaN
NaN	NaN	NaN	NaN	NaN	NaN	NaN	NaN	NaN	NaN	NaN	NaN	NaN	NaN	NaN	NaN	NaN	NaN	NaN	NaN	NaN	NaN	NaN	NaN	NaN	NaN	NaN	NaN	NaN	NaN	NaN	NaN	NaN	NaN	NaN	NaN	NaN	NaN	NaN	NaN	NaN	NaN	NaN	NaN	NaN	NaN	NaN	NaN	NaN	NaN
0.86338	0.74793	1.0232	0.57853	0.84978	1.306	0.36589	0.644	0.80152	0.67592	0.69535	0.95032	0.66315	0.77948	0.99557	0.82249	0.70407	1.0577	0.70026	0.66566	0.90077	0.55918	0.81284	1.028	0.79375	0.75278	1.0181	0.72594	0.75069	0.86273	0.7715	0.94537	1.2528	0.75628	0.78855	1.0249	0.72041	0.87425	1.0499	0.89632	NaN	1.1799	0.76306	1.0217	0.99836	1.1978	0.78149	0.85939	1.3847	0.91148
0.82987	0.62884	NaN	0.58029	0.34816	NaN	NaN	0.43848	NaN	NaN	0.32078	NaN	0.58265	0.3171	1.2143	NaN	0.34352	1.1442	0.60714	0.41988	NaN	22.901	0.36273	1.1844	0.53437	0.35325	0.59025	0.7476	0.33964	NaN	0.55959	0.38137	NaN	NaN	0.24713	1.4226	0.58019	0.27587	1.192	0.47566	0.17937	0.9611	0.52598	0.23606	0.64302	0.34292	NaN	0.20563	NaN	0.25575
0.774	NaN	NaN	0.41438	0.70381	NaN	0.26062	NaN	NaN	0.62225	NaN	NaN	0.48355	NaN	NaN	0.68632	0.65799	NaN	0.55194	NaN	NaN	0.41814	NaN	NaN	0.68873	NaN	NaN	0.63541	0.68928	NaN	1.014	NaN	NaN	1.0904	NaN	NaN	0.58585	NaN	NaN	0.80407	NaN	NaN	0.73619	NaN	NaN	NaN	NaN	NaN	NaN	NaN
0.88168	0.66484	NaN	0.5751	0.82734	NaN	0.26104	NaN	0.95566	0.57647	0.54689	0.64736	0.5703	0.69044	NaN	0.79008	NaN	0.93722	0.61419	0.58765	NaN	0.50383	NaN	0.96586	0.70391	0.56543	0.87844	0.66991	0.61916	0.89047	0.70956	NaN	1.9317	0.66666	NaN	0.93396	0.52231	NaN	NaN	0.76909	NaN	NaN	0.74818	NaN	NaN	NaN	0.72218	0.75434	NaN	NaN
0.89527	0.71166	0.83406	0.57949	0.77971	NaN	0.39167	0.59225	0.91902	0.7357	0.71122	0.61212	0.67538	0.70121	0.98836	0.91677	0.74156	0.99198	0.75283	0.62403	0.84022	0.60313	0.73385	0.95651	0.87271	0.64771	0.80906	0.6985	0.65474	0.79261	0.79829	0.78983	0.87401	0.94974	0.59247	0.89315	0.7208	0.67594	0.93252	0.83823	0.69447	0.98393	0.8708	0.69324	0.96268	1.0028	0.65281	0.60438	1.2177	0.72168
1.0918	0.75427	0.98617	0.76988	0.77752	NaN	0.30789	0.83645	NaN	NaN	NaN	NaN	0.73612	0.8486	1.0037	NaN	0.73982	NaN	0.74309	0.76569	NaN	NaN	0.89481	NaN	0.81861	0.77213	NaN	NaN	0.80648	NaN	NaN	0.88768	0.93701	NaN	0.6172	NaN	NaN	0.88185	NaN	0.77807	0.50808	NaN	0.74813	NaN	NaN	0.98525	NaN	0.68131	1.4392	0.64941
NaN	NaN	NaN	NaN	NaN	NaN	NaN	NaN	NaN	NaN	NaN	NaN	NaN	NaN	NaN	NaN	NaN	NaN	NaN	NaN	NaN	NaN	NaN	NaN	NaN	NaN	NaN	NaN	NaN	NaN	NaN	NaN	NaN	NaN	NaN	NaN	NaN	NaN	NaN	NaN	NaN	NaN	NaN	NaN	NaN	NaN	NaN	NaN	NaN	NaN
0.76526	0.80214	0.93111	0.66592	NaN	1.1127	0.2779	NaN	1.063	1.4377	NaN	1.0412	0.72288	NaN	0.9899	0.83935	0.39157	0.97107	0.40224	0.47921	0.80583	1.4511	0.43128	1.1501	0.57713	NaN	0.90563	0.67832	NaN	0.81162	0.90827	0.39083	1.0659	1.147	NaN	1.0229	0.65069	NaN	0.91009	0.60944	0.2658	1.1252	0.66162	NaN	0.95041	0.40561	0.86573	NaN	1.2845	0.28596
0.90228	0.77824	1.0122	0.63222	0.72364	1.1113	0.36753	0.6381	0.87374	0.74944	0.63407	0.84968	0.55953	0.70772	0.83586	0.84868	0.65812	0.8872	0.71261	0.60339	0.80156	0.66395	0.6929	0.98612	0.70575	0.66778	0.8166	0.7221	0.5967	0.79229	0.72297	0.74975	0.92553	0.73082	0.63187	0.89601	0.60882	0.74399	0.93091	0.78057	0.60988	1.0163	0.70629	0.73997	0.85856	0.983	0.70582	0.63911	1.1368	0.64715
NaN	0.69832	0.93542	NaN	0.52082	NaN	NaN	0.56541	0.71175	NaN	0.49324	NaN	NaN	0.48475	0.97378	0.71584	NaN	1.0285	NaN	0.59293	NaN	0.60954	0.51201	NaN	NaN	0.93923	0.88564	0.69597	0.47189	0.78082	NaN	0.55713	0.94766	NaN	0.37014	0.96493	0.52585	0.53025	0.96063	NaN	0.41737	1.0422	NaN	NaN	NaN	NaN	0.83026	NaN	1.3411	NaN
0.82333	0.93652	1.0145	0.66205	0.81359	1.0345	0.37913	0.70108	0.77926	0.8017	0.75687	0.67302	0.70272	0.71033	0.92945	0.89499	0.63581	0.82773	0.70909	0.62056	0.79221	0.58915	0.7601	1.0303	0.79496	0.76185	0.81972	0.73054	0.63053	0.76588	0.72089	0.81774	0.77157	0.63953	0.68163	1.1813	0.68132	0.81159	0.78993	0.7993	0.67806	1.0198	0.77378	0.70861	0.91913	1.0034	0.84421	0.78893	1.279	0.80067
0.87302	NaN	NaN	NaN	NaN	NaN	NaN	NaN	NaN	NaN	NaN	NaN	NaN	NaN	NaN	NaN	NaN	NaN	0.89388	NaN	NaN	NaN	NaN	NaN	NaN	NaN	NaN	0.52376	NaN	NaN	NaN	NaN	NaN	NaN	NaN	NaN	NaN	NaN	NaN	NaN	NaN	NaN	NaN	NaN	NaN	NaN	NaN	NaN	NaN	NaN
NaN	NaN	NaN	NaN	NaN	NaN	NaN	NaN	NaN	NaN	NaN	NaN	NaN	NaN	NaN	NaN	NaN	NaN	NaN	NaN	NaN	NaN	NaN	NaN	NaN	NaN	NaN	NaN	NaN	NaN	NaN	NaN	NaN	NaN	NaN	NaN	NaN	NaN	NaN	NaN	NaN	NaN	NaN	NaN	NaN	NaN	NaN	NaN	NaN	NaN
NaN	NaN	NaN	NaN	NaN	NaN	NaN	NaN	NaN	NaN	NaN	NaN	NaN	NaN	NaN	NaN	NaN	NaN	NaN	NaN	NaN	NaN	NaN	NaN	NaN	NaN	NaN	NaN	NaN	NaN	NaN	NaN	NaN	NaN	NaN	NaN	NaN	NaN	NaN	NaN	NaN	NaN	NaN	NaN	NaN	NaN	NaN	NaN	NaN	NaN
0.85834	0.70497	1.0533	0.65919	0.7397	1.4026	0.36504	0.59555	0.7243	0.70337	0.65257	0.83073	0.64996	0.69318	0.93559	0.96218	0.66792	1.0159	0.68795	0.66043	0.87497	0.6999	0.79345	1.107	0.7965	0.83754	0.92034	0.71028	0.79753	0.92349	0.71326	0.83635	0.97835	0.79681	0.69517	1.0444	0.68685	0.78787	1.0954	0.80757	0.63212	1.0543	0.76254	0.69686	0.91652	1.1172	0.79095	0.68688	1.2894	0.6033
NaN	NaN	NaN	NaN	NaN	NaN	NaN	NaN	NaN	NaN	NaN	NaN	NaN	NaN	NaN	NaN	NaN	NaN	NaN	NaN	NaN	NaN	NaN	NaN	NaN	NaN	NaN	NaN	NaN	NaN	NaN	NaN	NaN	NaN	NaN	NaN	NaN	NaN	NaN	NaN	NaN	NaN	NaN	NaN	NaN	NaN	NaN	NaN	NaN	NaN
NaN	0.86929	NaN	NaN	1.0115	NaN	NaN	NaN	NaN	NaN	NaN	NaN	NaN	NaN	NaN	NaN	NaN	NaN	NaN	NaN	NaN	NaN	NaN	NaN	NaN	NaN	NaN	NaN	NaN	NaN	NaN	NaN	NaN	NaN	NaN	NaN	NaN	NaN	NaN	NaN	NaN	NaN	NaN	NaN	NaN	NaN	NaN	NaN	NaN	0.67246
NaN	NaN	NaN	NaN	NaN	NaN	NaN	NaN	NaN	NaN	NaN	NaN	0.66625	NaN	NaN	NaN	NaN	NaN	NaN	0.73183	NaN	NaN	NaN	NaN	NaN	0.76283	NaN	0.83495	NaN	NaN	NaN	NaN	NaN	NaN	NaN	NaN	NaN	0.8037	NaN	NaN	NaN	NaN	NaN	NaN	NaN	NaN	NaN	NaN	NaN	0.71373
0.77625	0.60188	NaN	0.5545	0.83302	NaN	0.53149	0.65092	0.72763	0.60183	0.4986	1.1975	0.62651	0.53883	NaN	0.76807	0.42907	0.9775	0.49939	0.53341	1.059	0.5429	0.6548	NaN	0.6974	0.66668	1.216	0.55904	NaN	NaN	0.74959	0.70024	0.72654	0.67242	0.57914	NaN	0.55133	0.60634	NaN	0.62089	0.62717	0.92251	0.5841	0.61232	NaN	0.99932	NaN	0.60206	NaN	0.54038
NaN	NaN	NaN	NaN	NaN	NaN	NaN	NaN	NaN	0.94833	NaN	NaN	NaN	NaN	NaN	NaN	NaN	NaN	NaN	NaN	NaN	NaN	NaN	NaN	NaN	NaN	NaN	NaN	NaN	NaN	1.0467	NaN	NaN	NaN	NaN	NaN	NaN	NaN	NaN	NaN	NaN	NaN	NaN	NaN	NaN	NaN	NaN	NaN	NaN	NaN
0.77345	0.62452	NaN	0.60635	0.73813	NaN	0.30664	0.757	NaN	0.64437	0.64418	NaN	0.55852	0.64464	NaN	0.82619	0.60107	NaN	0.5944	NaN	NaN	0.51931	NaN	NaN	0.767	0.66196	NaN	0.84152	0.75051	NaN	0.66756	0.79111	NaN	0.73538	0.60825	NaN	0.61546	0.71185	NaN	0.64635	0.52396	NaN	0.72082	0.70577	NaN	1.2299	NaN	0.67714	NaN	NaN
0.92034	0.7602	1.0071	0.70451	0.75432	1.204	0.36835	0.62883	0.82292	0.6348	0.5837	0.8209	0.6581	0.64303	0.92529	0.90094	0.60021	0.94669	0.69717	0.87571	0.9	0.57337	0.70657	0.97404	0.87329	0.71364	0.87102	0.82929	0.76406	0.84594	0.70303	0.8005	1.0315	0.87899	0.69802	0.94283	0.66762	0.7944	0.90984	0.80584	0.85105	1.1093	0.81347	1.0633	0.92232	1.1891	0.83105	0.79332	1.1545	0.77129
NaN	NaN	NaN	NaN	NaN	NaN	NaN	NaN	NaN	NaN	NaN	NaN	NaN	NaN	NaN	NaN	NaN	NaN	NaN	NaN	NaN	NaN	NaN	NaN	NaN	NaN	NaN	NaN	NaN	NaN	NaN	NaN	NaN	NaN	NaN	NaN	NaN	NaN	NaN	NaN	NaN	NaN	NaN	NaN	NaN	NaN	NaN	NaN	NaN	NaN
0.89073	0.77488	1.0067	0.648	0.80342	1.1627	0.38374	0.67449	0.89875	0.73789	0.64244	0.88796	0.65425	0.68571	0.91459	0.83017	0.67418	0.96597	0.71619	0.63164	0.91993	0.67958	0.70774	0.99313	0.73751	0.73616	0.86569	0.70199	0.65662	0.85834	0.78376	0.81117	0.91376	0.7679	0.62805	0.95654	0.64637	0.7433	0.98792	0.80062	0.60295	1.0932	0.76544	0.69115	0.94952	1.0265	0.74215	0.65921	1.3848	0.70433
0.9324	0.77399	0.98208	0.638	0.76267	1.3057	0.337	0.79919	0.86406	0.66812	0.72908	0.76463	0.70831	0.79629	0.98452	0.86557	0.69089	0.99416	0.81071	0.64464	0.95435	0.60121	0.80351	0.98653	0.70704	0.95385	0.59756	0.81457	0.81583	1.0028	0.69942	0.85946	0.9441	0.71156	0.9578	0.87463	0.6561	0.81466	0.95471	0.85536	1.3647	1.0098	0.9385	1.1518	1.1139	1.0589	0.75482	1.173	1.2491	1.1095
1.0153	0.76181	0.79587	0.6969	0.65305	0.84	0.50135	0.67933	0.94897	0.65528	0.58296	0.88244	0.59924	0.65646	0.88184	0.67442	0.59024	1.1578	0.78969	0.54803	0.63756	0.59597	0.76229	1.021	0.73994	0.66579	0.67414	0.95346	0.55707	0.66127	0.71166	0.79155	0.80485	1.022	0.66196	1.0927	0.57874	0.72881	1.0146	0.82287	0.63631	1.0464	0.74324	0.71909	1.1456	0.88008	0.72459	0.70442	1.579	0.61321
1.0057	0.70261	NaN	0.51892	NaN	NaN	0.33872	NaN	NaN	NaN	0.6013	0.93742	0.73459	NaN	NaN	NaN	NaN	NaN	0.7027	NaN	NaN	0.60963	NaN	0.84707	0.6991	NaN	NaN	0.7479	NaN	0.87778	1.4052	NaN	NaN	1.7502	NaN	1.012	0.63379	NaN	NaN	0.73648	NaN	NaN	NaN	0.6365	0.82517	NaN	0.57419	NaN	NaN	NaN
0.71453	0.96168	0.90835	0.69975	0.96757	1.0937	0.45672	0.87186	0.92541	0.80756	0.73026	0.98971	0.70624	0.80552	1.0032	0.82065	0.75243	0.96383	0.6914	0.66758	0.89965	0.70048	0.67268	1.0683	0.80975	0.9032	0.84346	0.70542	0.6814	0.81705	0.79706	0.68853	1.0913	0.7138	0.67269	1.066	0.63028	0.75595	1.0725	0.86779	0.71841	1.0442	0.76832	0.78386	0.97528	0.96425	0.67153	0.70958	1.3512	0.68531
NaN	NaN	NaN	NaN	NaN	NaN	NaN	NaN	NaN	NaN	NaN	NaN	NaN	NaN	NaN	NaN	NaN	NaN	NaN	NaN	NaN	NaN	NaN	NaN	NaN	NaN	NaN	0.89469	NaN	NaN	NaN	NaN	NaN	NaN	NaN	NaN	NaN	NaN	0.91889	NaN	NaN	NaN	NaN	NaN	NaN	NaN	NaN	NaN	NaN	NaN
NaN	0.75748	NaN	NaN	0.8223	NaN	NaN	0.87751	NaN	NaN	0.72214	NaN	NaN	0.80525	0.85251	1.46	0.90223	NaN	0.86845	0.61262	NaN	NaN	1.0574	NaN	NaN	1.0882	NaN	NaN	0.82677	NaN	NaN	0.97838	NaN	NaN	NaN	NaN	0.60673	1.0492	NaN	0.7972	NaN	NaN	0.68973	NaN	NaN	NaN	NaN	NaN	NaN	NaN
NaN	NaN	NaN	NaN	NaN	NaN	NaN	NaN	NaN	NaN	NaN	NaN	NaN	NaN	NaN	NaN	NaN	NaN	NaN	NaN	NaN	NaN	NaN	NaN	NaN	NaN	NaN	NaN	NaN	NaN	NaN	NaN	NaN	NaN	NaN	NaN	NaN	0.79062	NaN	NaN	0.76268	NaN	NaN	NaN	NaN	NaN	NaN	NaN	NaN	NaN
NaN	NaN	NaN	NaN	NaN	NaN	NaN	NaN	NaN	NaN	NaN	NaN	NaN	NaN	NaN	NaN	NaN	NaN	NaN	NaN	NaN	NaN	NaN	NaN	NaN	NaN	NaN	NaN	NaN	NaN	NaN	1.3508	NaN	NaN	NaN	NaN	NaN	NaN	NaN	NaN	NaN	NaN	NaN	NaN	NaN	NaN	NaN	NaN	NaN	NaN
NaN	NaN	NaN	NaN	NaN	NaN	NaN	NaN	NaN	NaN	NaN	NaN	NaN	NaN	NaN	NaN	NaN	NaN	NaN	NaN	NaN	NaN	NaN	NaN	NaN	NaN	NaN	NaN	NaN	NaN	NaN	NaN	NaN	NaN	NaN	NaN	NaN	NaN	NaN	NaN	NaN	NaN	NaN	NaN	NaN	NaN	NaN	NaN	NaN	NaN
NaN	NaN	NaN	NaN	NaN	NaN	NaN	NaN	NaN	NaN	NaN	NaN	NaN	NaN	NaN	NaN	NaN	NaN	NaN	NaN	NaN	NaN	NaN	NaN	NaN	NaN	NaN	NaN	NaN	NaN	NaN	NaN	NaN	NaN	NaN	NaN	NaN	NaN	NaN	NaN	NaN	NaN	NaN	NaN	NaN	NaN	NaN	NaN	NaN	NaN
NaN	NaN	NaN	NaN	NaN	NaN	NaN	NaN	NaN	NaN	NaN	NaN	NaN	NaN	NaN	NaN	NaN	NaN	NaN	NaN	NaN	NaN	NaN	NaN	NaN	NaN	NaN	NaN	NaN	NaN	NaN	NaN	NaN	NaN	NaN	NaN	NaN	NaN	NaN	NaN	NaN	NaN	NaN	NaN	NaN	NaN	NaN	NaN	NaN	NaN
0.85611	0.7324	0.91149	0.57869	0.84021	NaN	0.39677	0.73446	1.1538	0.62734	0.69837	0.94053	0.56443	0.60729	NaN	0.80193	0.6753	0.91615	0.62198	0.64056	NaN	0.53419	0.64486	0.82583	0.70294	0.71647	0.92296	0.70402	0.52383	0.6287	0.87451	0.78214	0.96118	0.68785	0.38809	1.2432	0.73394	0.69152	0.87972	0.79665	0.88689	0.94174	0.81555	0.50068	0.82838	0.857	0.81332	0.49959	1.2923	0.54061
NaN	NaN	NaN	NaN	NaN	NaN	NaN	NaN	NaN	NaN	NaN	NaN	NaN	NaN	NaN	NaN	NaN	NaN	NaN	NaN	NaN	NaN	NaN	NaN	NaN	NaN	NaN	NaN	NaN	NaN	NaN	NaN	NaN	NaN	NaN	NaN	NaN	NaN	NaN	NaN	NaN	NaN	NaN	NaN	NaN	NaN	NaN	NaN	NaN	NaN
0.84362	NaN	0.81232	0.99128	NaN	NaN	0.45524	NaN	0.87385	NaN	NaN	0.71897	NaN	NaN	NaN	NaN	NaN	0.80221	NaN	0.67531	NaN	0.47351	0.70982	0.99571	NaN	NaN	0.69599	0.69755	NaN	NaN	NaN	1.1461	0.86035	NaN	NaN	0.7003	0.71923	NaN	0.94576	0.91654	NaN	0.69265	NaN	NaN	0.80897	NaN	NaN	NaN	1.1961	NaN
NaN	NaN	NaN	0.63507	NaN	NaN	NaN	NaN	NaN	NaN	NaN	NaN	NaN	NaN	NaN	NaN	NaN	NaN	NaN	NaN	NaN	NaN	NaN	NaN	NaN	NaN	NaN	NaN	NaN	NaN	NaN	NaN	NaN	NaN	NaN	NaN	NaN	NaN	NaN	NaN	NaN	NaN	NaN	NaN	NaN	NaN	NaN	NaN	NaN	NaN
0.87692	0.8133	1.0114	0.69226	0.7329	1.3142	0.37089	0.65996	0.73542	0.7806	0.75586	0.91879	0.67847	0.62594	0.84511	0.83542	0.67238	0.87999	0.67109	0.79285	0.90202	0.82516	0.80638	1.0411	0.77926	0.72262	0.88618	0.71699	0.68564	0.81151	0.72175	0.78299	0.92907	0.74722	0.63642	0.92849	0.74083	0.70182	0.88039	0.82684	0.62328	1.0401	0.76716	0.75876	0.85424	0.97584	0.65167	0.6584	1.2263	0.66331
0.95595	NaN	NaN	0.70392	NaN	NaN	1.1877	NaN	NaN	0.59331	NaN	NaN	0.66632	NaN	NaN	0.82758	NaN	NaN	0.63832	NaN	NaN	0.85505	NaN	NaN	0.8296	NaN	NaN	0.70864	NaN	NaN	0.75908	NaN	NaN	0.71862	NaN	NaN	NaN	NaN	NaN	NaN	NaN	NaN	1.1631	NaN	NaN	NaN	NaN	NaN	NaN	NaN
0.8222	0.77127	0.96105	0.64774	0.60482	1.0931	0.32936	0.55266	0.86759	0.87187	0.61051	0.79128	0.6007	0.64724	0.87488	0.78285	0.59242	0.84361	0.6384	0.62106	0.81127	0.79168	0.62502	0.87489	0.7003	0.60425	0.73908	0.6004	0.59167	0.76146	0.65159	0.66308	0.85264	0.73327	0.60468	0.85448	0.66329	0.5685	0.93599	0.70163	0.60907	0.89543	0.67324	0.73739	0.84129	0.97145	0.67434	0.62218	1.152	0.69227
1.1246	NaN	1.052	0.69361	NaN	1.0145	0.28019	NaN	0.93123	0.856	NaN	0.96165	0.43104	NaN	0.88866	0.74993	0.51212	0.95744	0.48899	NaN	0.88978	0.6895	NaN	1.0249	0.57037	NaN	0.75308	0.66296	NaN	0.66057	0.42514	NaN	0.82063	NaN	0.80905	0.94945	0.58181	NaN	1.0024	0.71065	NaN	NaN	0.62227	NaN	0.85349	0.95982	0.74245	NaN	1.2252	NaN
0.90951	0.95098	1.0582	0.71321	0.74106	1.2369	0.403	0.73975	0.9172	0.86465	0.80788	0.90147	0.68296	0.72127	0.79579	0.90011	0.70193	0.8759	0.82697	0.69257	0.89845	0.81342	0.72248	1.0016	0.75412	0.70331	0.75021	0.7526	0.66846	0.75382	0.77137	0.8182	0.91719	0.8335	0.69684	1.0141	0.67912	0.72503	0.94777	0.81337	0.67403	0.96564	0.79865	0.66401	0.83226	1.0778	0.67464	0.78678	1.1786	0.7183
0.91954	0.71927	1.0002	0.64423	0.76575	1.0828	0.38405	0.68274	0.8176	0.72554	0.58515	0.87072	0.624	0.66013	0.89637	0.89244	0.63335	0.92001	0.71418	0.59087	0.8752	0.65417	0.70578	0.86013	0.81802	0.67402	0.79558	0.75589	0.65111	0.79882	0.81604	0.793	0.89935	0.7455	0.59268	0.99848	0.61706	0.76638	0.90391	0.84716	0.58552	0.96899	0.81534	0.70396	0.84114	1.0094	0.61279	0.67965	1.188	0.69269
NaN	NaN	NaN	NaN	NaN	NaN	NaN	NaN	NaN	NaN	NaN	NaN	NaN	NaN	NaN	NaN	NaN	NaN	NaN	NaN	NaN	NaN	NaN	NaN	NaN	NaN	NaN	NaN	NaN	NaN	NaN	NaN	NaN	NaN	NaN	NaN	NaN	NaN	NaN	NaN	NaN	NaN	NaN	NaN	NaN	NaN	NaN	NaN	NaN	NaN
0.88337	0.68332	1.0351	0.61693	0.68277	1.1419	0.46739	0.56768	NaN	0.75446	0.6652	NaN	0.69386	0.66471	NaN	0.7267	0.56024	NaN	0.67712	0.57307	NaN	0.72594	0.71469	NaN	0.71722	0.73679	NaN	0.66712	0.57687	NaN	0.65518	0.7326	NaN	0.71645	0.5396	NaN	0.71169	0.73272	NaN	0.75936	0.48477	NaN	0.61604	0.50922	NaN	0.87994	NaN	0.52363	NaN	0.60012
0.82207	0.7802	1.188	0.49154	0.64648	NaN	0.46649	0.69859	NaN	0.61107	0.63581	NaN	NaN	0.6527	NaN	0.93548	0.55422	NaN	0.6846	0.46633	NaN	0.5571	NaN	NaN	0.91092	NaN	NaN	0.73197	0.51321	NaN	0.89618	0.59645	NaN	0.61663	NaN	NaN	0.50413	0.86393	NaN	0.68994	NaN	0.82071	0.69607	0.62597	NaN	1.0593	NaN	0.50089	NaN	0.56452
0.88898	0.67866	1.0104	0.66546	0.84874	1.2119	0.48607	0.61094	0.84072	0.75711	0.58515	1.1214	0.71833	0.67297	1.0421	0.94128	0.63718	0.81443	0.78248	0.61935	0.99385	0.6908	0.92502	0.97681	0.78865	NaN	0.82154	0.73954	0.61393	0.89857	0.85952	0.73385	0.86391	0.76597	0.7045	1.1408	0.63602	0.71686	0.89637	0.78236	0.52066	0.9677	0.69989	NaN	0.88891	1.0383	0.66483	0.72387	1.2667	0.71503
0.81342	0.65057	0.97908	0.50437	0.60451	NaN	0.28495	0.55708	NaN	0.55437	0.55927	NaN	0.63929	0.59134	0.87787	0.75427	0.57714	1.0225	0.61177	0.54798	NaN	0.54595	0.56752	0.91973	0.66377	0.53147	0.83606	0.61103	0.57017	0.82414	0.71485	0.6932	1.0367	0.63333	0.60938	1.0011	0.57974	0.64684	0.89667	0.70732	0.60073	1.2178	0.66897	0.72639	0.81624	0.99704	0.76414	1.0624	1.2631	1.0784
1.0145	0.86265	1.036	0.99905	0.73954	0.96179	NaN	0.59796	NaN	0.73324	0.6841	NaN	0.75818	0.76303	0.73539	0.88407	NaN	0.95747	0.89546	0.57041	NaN	1.2249	0.73219	0.89876	0.69907	0.74462	0.93005	0.64982	0.85804	0.68922	0.84316	1.0058	0.97236	0.81226	0.9933	1.1719	0.80078	0.54361	0.86601	0.85099	1.0866	1.2576	0.74721	0.69268	0.88542	1.2139	NaN	0.73508	1.2832	0.89324
0.84654	0.76283	NaN	0.52967	0.70092	NaN	0.45853	0.74477	NaN	NaN	0.65097	NaN	0.55748	0.68247	NaN	NaN	0.57961	NaN	0.83329	NaN	NaN	0.72058	0.70571	NaN	0.75695	0.94058	NaN	0.80061	0.62669	NaN	0.71092	0.83994	NaN	0.76023	0.69522	NaN	0.6332	0.66195	NaN	0.74426	NaN	NaN	0.72262	0.77473	NaN	1.2031	NaN	0.72237	1.4123	0.73368
0.86718	0.8253	0.88192	0.62548	0.66055	0.97096	0.36689	0.60679	0.85544	0.74394	0.55542	0.79433	0.61107	0.58976	0.87033	0.82245	0.59821	0.85821	0.68429	0.55024	0.80552	0.66817	0.63728	0.88046	0.6844	0.65161	0.73451	0.70234	0.5632	0.72525	0.74744	0.702	0.8374	0.73053	0.82176	0.84527	0.58409	0.67214	0.86752	0.81948	0.78762	0.96709	0.67735	0.98623	0.82171	1.1342	0.57905	0.80722	1.2014	0.99168
1.0207	NaN	NaN	2.5677	0.38383	NaN	1.1713	0.30354	NaN	1.5571	0.34159	NaN	1.8359	0.39312	NaN	1.2812	0.28205	NaN	0.80671	0.29975	NaN	0.87208	0.68955	NaN	0.60471	0.71575	NaN	0.74992	0.50917	NaN	0.66889	1.1431	NaN	0.66001	15.178	NaN	0.3762	1.2247	NaN	0.77579	16.569	NaN	0.47028	7.1292	NaN	3.7648	NaN	13.489	NaN	15.019
0.88859	0.76653	0.99028	0.65697	0.78863	1.0459	0.37908	0.65607	0.89358	0.69068	0.68602	0.80757	0.63238	0.6424	0.95544	0.85119	0.62071	0.94578	0.67095	0.57862	0.84949	0.5746	0.68615	0.94313	0.79917	0.8198	0.81345	0.83907	0.57134	0.74122	0.76295	0.78739	0.96232	0.78949	0.62509	1.0062	0.63539	0.83288	0.93459	0.83318	0.70903	0.93295	0.75161	0.74725	0.93308	1.0209	0.73686	0.70319	1.4516	0.77053
0.90793	0.85277	0.93986	0.65852	0.76447	1.2042	0.38633	0.7141	0.77566	0.66696	0.65132	0.98401	0.6637	0.7322	1.0256	0.78202	0.68342	1.0246	0.7459	0.5931	0.86902	0.57602	0.81315	1.0671	0.79296	0.75074	0.92469	0.72443	0.66617	0.9153	0.78411	0.82155	0.98728	0.78448	0.67801	1.1421	0.63955	0.82348	1.0252	0.84721	0.68373	1.2297	0.81762	0.68763	0.98431	1.1724	0.78889	0.75935	1.3655	0.80954
NaN	NaN	NaN	NaN	NaN	NaN	NaN	0.87047	NaN	NaN	NaN	NaN	NaN	NaN	NaN	NaN	NaN	NaN	NaN	NaN	NaN	NaN	NaN	NaN	NaN	NaN	NaN	NaN	NaN	NaN	0.78653	NaN	NaN	NaN	NaN	NaN	NaN	NaN	NaN	NaN	NaN	NaN	NaN	NaN	NaN	NaN	NaN	NaN	NaN	NaN
NaN	NaN	NaN	NaN	NaN	NaN	NaN	NaN	NaN	NaN	NaN	NaN	NaN	NaN	NaN	NaN	NaN	NaN	NaN	NaN	NaN	NaN	NaN	NaN	NaN	NaN	NaN	NaN	NaN	NaN	NaN	NaN	NaN	NaN	NaN	NaN	NaN	NaN	NaN	NaN	NaN	NaN	NaN	NaN	NaN	NaN	NaN	NaN	NaN	NaN
NaN	NaN	NaN	0.65778	0.86417	NaN	NaN	0.68092	1.1389	0.55605	NaN	NaN	0.74924	NaN	1.0297	0.82592	NaN	NaN	NaN	0.74621	NaN	NaN	0.70326	NaN	0.61805	0.73603	NaN	NaN	0.75809	0.81788	0.84693	0.78687	0.95434	0.75509	0.85353	0.88468	NaN	0.67069	NaN	1.1777	0.59352	NaN	0.97824	0.83693	0.96653	NaN	NaN	NaN	1.0855	NaN
0.85426	0.74074	0.92484	0.57867	0.77398	1.1933	0.37228	0.65951	0.82711	0.68762	0.64504	0.84651	0.6214	0.72612	0.92106	0.82538	0.62209	0.98207	0.70717	0.62092	0.91168	0.5864	0.67339	0.95447	0.74045	0.70436	0.82647	0.73007	0.59264	0.81674	0.77074	0.76936	0.95013	0.79469	0.57961	0.96677	0.59835	0.75485	0.97473	0.7777	0.58151	1.0013	0.76491	0.64806	0.95906	1.0286	0.71648	0.61684	1.3286	0.64202
0.86215	0.74727	0.97106	0.66534	0.71028	1.1445	0.38217	0.6447	0.93136	0.69941	0.59868	0.8862	0.63156	0.62277	0.96002	0.79793	0.61988	0.91855	0.70816	0.57786	0.84951	0.57958	0.68784	0.93378	0.67827	0.69038	0.88233	0.68855	0.60122	0.83095	0.7461	0.75005	0.94708	0.73647	0.76301	0.92001	0.59762	0.74961	0.99749	0.76485	0.82877	1.0758	0.7497	0.9748	0.96242	1.2063	0.68837	0.88911	1.3619	0.93872
NaN	NaN	NaN	NaN	NaN	NaN	NaN	NaN	NaN	NaN	NaN	NaN	NaN	NaN	NaN	NaN	NaN	NaN	NaN	NaN	NaN	NaN	NaN	NaN	NaN	NaN	NaN	NaN	NaN	NaN	NaN	NaN	NaN	NaN	NaN	NaN	NaN	NaN	NaN	NaN	NaN	NaN	NaN	NaN	NaN	NaN	NaN	NaN	NaN	NaN
NaN	NaN	NaN	NaN	NaN	NaN	NaN	NaN	NaN	NaN	NaN	NaN	NaN	NaN	NaN	NaN	NaN	NaN	NaN	NaN	NaN	NaN	NaN	NaN	NaN	NaN	NaN	NaN	NaN	NaN	NaN	NaN	NaN	NaN	NaN	NaN	NaN	NaN	NaN	NaN	NaN	NaN	NaN	NaN	NaN	NaN	NaN	NaN	NaN	NaN
0.79928	0.95116	NaN	0.67908	0.78787	NaN	0.39982	0.80703	NaN	0.68189	0.79742	NaN	0.6097	0.7888	NaN	0.7954	0.83921	NaN	0.68979	0.61733	NaN	0.58626	0.537	NaN	0.65418	0.78444	NaN	0.7279	0.81182	NaN	0.81366	0.91949	NaN	0.64016	1.041	NaN	NaN	0.82043	NaN	0.70385	0.70477	NaN	0.63083	1.354	NaN	1.1813	NaN	1.1617	NaN	0.75573
NaN	NaN	NaN	NaN	NaN	NaN	NaN	NaN	NaN	NaN	NaN	NaN	NaN	NaN	NaN	NaN	NaN	NaN	NaN	NaN	NaN	NaN	NaN	NaN	NaN	NaN	NaN	NaN	NaN	NaN	NaN	NaN	NaN	NaN	NaN	NaN	NaN	NaN	NaN	NaN	NaN	NaN	NaN	NaN	NaN	NaN	NaN	NaN	NaN	NaN
0.79977	0.72722	1.0443	0.74665	0.58591	1.1011	0.46076	0.69502	1.0634	0.88719	0.76622	0.55889	0.75948	0.59208	1.205	0.84357	0.66198	1.0674	1.1525	0.68413	0.98144	0.79844	0.68259	1.206	0.97846	0.53269	0.55868	1.0026	0.75098	0.90417	0.94085	0.76627	1.3507	0.96332	0.37745	1.4651	0.83181	0.60269	1.1252	0.94406	NaN	NaN	1.0228	0.30248	1.0669	0.34613	0.7509	NaN	1.7174	0.47592
NaN	0.47144	NaN	NaN	NaN	NaN	NaN	NaN	NaN	NaN	NaN	NaN	NaN	NaN	NaN	NaN	NaN	NaN	NaN	NaN	NaN	NaN	NaN	NaN	NaN	NaN	NaN	NaN	NaN	NaN	NaN	0.53169	NaN	0.8034	NaN	NaN	NaN	0.79045	NaN	0.90233	0.60312	NaN	NaN	0.70474	NaN	NaN	NaN	NaN	NaN	NaN
0.92721	0.78168	0.98284	0.61921	0.80497	1.0081	0.3644	0.67129	0.78332	0.66652	0.65183	0.79869	0.60344	0.6719	0.93438	0.79933	0.6477	0.947	0.70477	0.59489	0.84656	0.59075	0.73869	0.9625	0.73415	0.73669	0.80425	0.73067	0.67882	0.85459	0.75764	0.77046	0.89142	0.73314	0.64641	0.96017	0.62172	0.72797	0.93159	0.76062	0.64496	1.0074	0.7258	0.68532	0.94408	1.0942	0.69527	0.65899	1.3522	0.67206
0.96891	0.93386	1.1121	0.72594	0.38153	1.2818	0.33389	0.46145	0.90514	1.5092	0.42202	1.0626	0.50478	0.59767	1.1238	0.79329	0.51317	1.3278	0.71701	0.70405	0.9124	1.6761	0.63158	1.187	0.52509	0.50954	0.90457	0.6973	0.48425	0.92377	0.74168	0.70967	1.1141	0.90446	0.41118	1.0683	0.76887	0.55289	1.3768	0.60863	0.36623	1.1395	0.5909	0.45589	1.1092	0.57288	0.79897	0.53605	1.3736	NaN
NaN	NaN	NaN	NaN	NaN	NaN	NaN	NaN	NaN	NaN	0.53604	NaN	NaN	NaN	NaN	0.64827	0.56646	NaN	NaN	NaN	NaN	NaN	NaN	NaN	NaN	NaN	NaN	NaN	NaN	NaN	NaN	NaN	NaN	NaN	NaN	NaN	NaN	NaN	NaN	NaN	NaN	NaN	1.965	NaN	NaN	NaN	NaN	NaN	NaN	NaN
NaN	NaN	NaN	NaN	NaN	NaN	NaN	NaN	NaN	NaN	NaN	NaN	NaN	NaN	NaN	NaN	NaN	NaN	NaN	NaN	NaN	NaN	NaN	NaN	NaN	NaN	NaN	NaN	NaN	NaN	NaN	NaN	NaN	NaN	NaN	NaN	NaN	NaN	NaN	NaN	NaN	NaN	NaN	NaN	NaN	NaN	NaN	NaN	NaN	NaN
0.84522	0.71463	1.0053	0.65905	0.75952	1.0107	0.3599	0.74301	0.78886	0.75425	0.69113	0.59733	0.63423	0.66992	0.8429	0.8142	0.6534	0.91431	0.67145	0.62735	0.80318	0.61961	0.73953	0.99613	0.74247	0.76146	0.7367	0.69731	0.5557	0.70635	0.71011	0.79323	0.65639	0.70921	0.57776	0.94192	0.54705	0.73971	0.86513	0.84382	0.47975	0.84937	0.66612	0.56979	0.58717	0.91195	0.76391	0.67663	1.3242	0.63672
NaN	0.78188	NaN	NaN	0.64867	NaN	NaN	0.58765	NaN	1.1024	0.55166	NaN	NaN	0.68561	NaN	NaN	0.55993	NaN	NaN	0.60388	NaN	0.76644	0.55426	NaN	0.82265	0.67491	NaN	NaN	0.59907	NaN	NaN	0.7345	NaN	NaN	NaN	NaN	NaN	0.7802	NaN	1.1607	0.54181	NaN	NaN	0.45329	NaN	0.78267	NaN	0.62498	NaN	0.61894
0.7809	NaN	0.66314	NaN	NaN	NaN	NaN	NaN	NaN	0.58097	NaN	NaN	NaN	NaN	NaN	NaN	NaN	NaN	NaN	NaN	NaN	NaN	0.4807	NaN	0.70773	NaN	NaN	0.69231	0.74719	NaN	NaN	0.71334	NaN	1.1085	NaN	NaN	NaN	NaN	NaN	0.6916	NaN	NaN	NaN	NaN	NaN	NaN	NaN	NaN	NaN	NaN
NaN	NaN	NaN	NaN	NaN	NaN	NaN	NaN	NaN	NaN	NaN	NaN	NaN	NaN	NaN	NaN	NaN	NaN	NaN	NaN	NaN	NaN	NaN	NaN	NaN	NaN	NaN	NaN	NaN	NaN	NaN	NaN	NaN	0.7828	NaN	NaN	NaN	NaN	NaN	NaN	NaN	NaN	NaN	NaN	NaN	NaN	NaN	NaN	NaN	NaN
NaN	0.7412	1.2366	0.66935	0.73301	1.3364	0.31391	NaN	NaN	NaN	NaN	NaN	0.52957	0.53259	0.89734	0.81793	NaN	1.0956	1.044	NaN	0.91018	0.74362	NaN	1.1226	NaN	NaN	0.81168	0.54698	0.35561	0.80868	0.57094	NaN	NaN	0.74876	NaN	0.96781	0.42535	NaN	1.2097	0.81921	NaN	1.3182	0.79881	NaN	1.0339	NaN	0.75264	1.4614	1.4217	NaN
NaN	0.95988	NaN	NaN	NaN	NaN	NaN	NaN	NaN	NaN	NaN	NaN	0.65698	NaN	NaN	NaN	NaN	NaN	NaN	NaN	NaN	NaN	NaN	NaN	NaN	NaN	NaN	0.60011	NaN	NaN	NaN	NaN	NaN	NaN	NaN	NaN	NaN	NaN	NaN	NaN	NaN	NaN	NaN	NaN	NaN	0.85378	NaN	NaN	NaN	NaN
0.80879	0.80211	0.93984	0.59395	0.77906	1.0119	0.3566	0.73295	0.94947	0.68165	0.63095	0.7279	0.62469	0.65018	0.85184	0.772	0.68476	0.86361	0.66211	0.63845	0.80749	0.55986	0.75797	0.86537	0.77079	0.67426	0.67705	0.67104	0.61512	0.73802	0.76612	0.74594	1.0139	0.85647	0.55663	0.83401	0.70269	0.70045	0.88794	0.83872	0.38202	0.94671	0.71251	0.65228	0.86349	0.91497	0.68045	0.59064	NaN	0.59268
0.82937	0.76107	1.0681	0.60681	0.70018	1.0173	0.37033	0.6439	0.77226	0.69537	0.61518	0.78648	0.67435	0.6191	0.88114	0.91823	0.60896	0.90921	0.71197	0.62508	0.82844	0.5877	0.71181	0.90965	0.75284	0.69851	0.82128	0.70814	0.57657	0.76588	0.73294	0.76852	0.88279	0.69073	0.64729	0.87418	0.59746	0.75147	0.9262	0.80888	0.62566	0.9269	0.77484	0.70822	0.90683	1.1015	0.69307	0.74267	1.279	0.78586
0.7957	0.77638	0.94584	0.72139	0.75453	1.1522	0.42708	0.73374	1.0056	0.64397	0.65167	0.83645	0.79692	0.67068	0.97163	0.81754	0.66606	1.1593	0.75526	0.63531	0.80068	0.60319	0.64624	1.05	0.83105	0.76708	0.80608	0.81401	0.65571	0.90369	0.69206	0.79625	0.9483	0.83266	0.60307	0.9713	0.61265	0.79429	0.99045	0.82185	0.69994	1.0444	0.80694	0.67796	0.9675	1.2155	0.60931	0.63791	1.1556	0.72455
NaN	NaN	NaN	0.35542	NaN	NaN	NaN	NaN	NaN	NaN	NaN	NaN	NaN	NaN	NaN	NaN	NaN	NaN	NaN	NaN	NaN	NaN	NaN	NaN	NaN	NaN	NaN	NaN	NaN	NaN	NaN	NaN	NaN	NaN	NaN	NaN	NaN	NaN	NaN	NaN	NaN	NaN	NaN	0.15154	NaN	NaN	NaN	NaN	NaN	NaN
0.86433	0.59222	0.94436	0.56084	0.6923	1.0236	0.41014	0.59065	0.77645	0.6717	0.57865	0.848	0.58509	0.65868	1.2029	0.74363	0.57463	1.1002	0.72928	0.50078	0.87753	0.56274	0.67122	1.1178	0.73487	0.68442	0.91098	0.70571	0.62058	0.93788	0.69578	0.71256	0.98366	0.69119	0.5152	1.035	0.65654	0.77019	1.0341	0.78133	0.47259	1.1298	0.78536	0.70375	1.0165	0.99612	0.79253	0.62514	1.526	0.65124
0.87441	0.74753	NaN	0.74028	0.7761	NaN	0.40642	0.62275	NaN	0.6879	NaN	NaN	0.7478	0.63393	NaN	0.85815	0.63125	NaN	0.88603	0.59123	NaN	0.59237	0.81956	NaN	0.80062	0.68972	NaN	0.83337	0.6305	NaN	0.71096	0.73723	NaN	0.74501	0.62835	NaN	0.63619	0.5926	1.4479	0.83628	0.63677	NaN	0.77287	0.59655	NaN	0.84844	NaN	NaN	NaN	0.38235
0.87114	NaN	0.83236	0.74063	0.59004	NaN	0.36633	0.60072	0.7848	NaN	NaN	1.071	0.69435	NaN	NaN	NaN	NaN	0.81788	0.76367	0.52717	NaN	0.56839	0.76524	NaN	0.68801	0.49846	NaN	0.74741	NaN	0.78301	NaN	0.75322	0.82108	0.80844	0.81527	NaN	0.68358	NaN	NaN	NaN	0.73506	0.85032	NaN	NaN	0.79779	NaN	NaN	0.78309	1.0124	0.66537
NaN	0.71046	NaN	0.59996	NaN	NaN	NaN	NaN	NaN	0.84948	0.80113	NaN	NaN	NaN	NaN	0.90052	NaN	NaN	0.52994	NaN	NaN	1.1081	NaN	NaN	1.0825	NaN	1.0835	NaN	0.56555	NaN	0.8229	NaN	1.0631	0.60128	NaN	NaN	0.59145	NaN	1.1825	0.76256	NaN	NaN	NaN	NaN	NaN	1.1379	NaN	0.66324	NaN	NaN
NaN	NaN	NaN	NaN	NaN	NaN	NaN	NaN	NaN	NaN	NaN	NaN	NaN	NaN	NaN	NaN	NaN	NaN	NaN	NaN	NaN	NaN	NaN	NaN	NaN	NaN	NaN	NaN	NaN	NaN	NaN	NaN	NaN	NaN	NaN	NaN	NaN	NaN	NaN	NaN	NaN	NaN	NaN	NaN	NaN	NaN	NaN	NaN	NaN	NaN
0.96605	0.46552	NaN	0.61385	0.63371	NaN	0.4018	0.56602	NaN	0.76224	0.60077	NaN	0.65383	0.6086	NaN	0.95346	0.64247	1.1644	0.75815	0.53597	NaN	0.53653	NaN	NaN	0.74946	0.67274	0.8595	0.78822	0.73712	0.8668	0.77065	0.84279	NaN	0.79729	0.50274	NaN	0.66314	NaN	NaN	0.91332	0.87047	NaN	0.7251	NaN	NaN	1.3842	NaN	NaN	NaN	NaN
NaN	NaN	1.1885	0.78787	NaN	NaN	NaN	NaN	NaN	NaN	0.5521	1.0321	0.80991	0.52418	NaN	NaN	NaN	NaN	NaN	NaN	NaN	0.66953	NaN	NaN	NaN	NaN	NaN	NaN	NaN	NaN	NaN	NaN	NaN	0.91799	0.69591	NaN	NaN	0.7083	NaN	NaN	NaN	NaN	NaN	0.51207	NaN	NaN	NaN	0.69259	1.932	NaN
0.86971	0.73432	0.9742	0.59525	0.70286	1.2658	0.35024	0.69234	0.96069	0.56952	0.67643	0.8795	0.59424	0.64765	0.88956	0.72775	0.72115	1.0684	0.69797	0.59955	0.88299	0.53004	0.6477	0.99423	0.71975	0.73768	0.82086	0.68935	0.61583	0.92051	0.7967	0.72778	0.93502	0.79693	0.56166	0.99613	0.61449	0.69936	0.98846	0.7426	0.53927	1.2375	0.73387	0.65048	0.94578	1.0278	0.83086	0.67093	1.2807	0.63068
0.83057	0.70721	1.0917	0.71607	0.75201	1.3403	0.41653	0.6335	0.95384	0.78581	0.72408	0.98206	0.68111	0.64951	1.0165	0.91917	0.60932	1.0629	0.82073	0.58952	0.87807	0.70877	0.79444	1.0105	0.77936	0.65363	0.90307	0.76879	0.66796	0.90463	0.85976	0.72532	1.011	0.83669	0.58712	1.196	0.65411	0.77708	1.091	0.9151	0.64752	1.1202	0.79965	0.81368	1.0022	0.99279	0.80878	0.74692	1.4487	0.65008
0.84899	0.7558	0.95676	0.59564	0.68896	1.0495	0.34281	0.64579	0.8821	0.6525	0.63597	0.76498	0.59967	0.65652	0.95305	0.82117	0.63718	0.954	0.69679	0.60654	0.80653	0.53859	0.69326	1.0127	0.71924	0.704	0.83736	0.70197	0.60287	0.71386	0.74634	0.77542	0.86278	0.73353	0.63529	0.91141	0.58887	0.71446	0.89877	0.75064	0.62339	1.0206	0.71356	0.68957	0.93449	1.0017	0.70238	0.63888	1.2569	0.67427
0.86478	0.77403	1.0519	0.64651	0.74807	1.0516	0.38902	0.71496	0.83728	0.63655	0.64867	0.85913	0.61431	0.70809	0.8614	0.89061	0.63822	0.91887	0.68502	0.61123	0.82283	0.56252	0.73957	0.95426	0.78699	0.74656	0.81457	0.74704	0.70693	0.7747	0.79527	0.80915	0.9338	0.78495	0.62951	0.99242	0.62745	0.74715	0.96988	0.80364	0.67352	1.0845	0.76364	0.71051	0.91078	1.0393	0.747	0.67521	1.2892	0.73128
0.88026	0.88149	0.94368	0.6308	0.75897	1.2739	0.35703	0.72265	0.86192	0.73044	0.68755	0.89998	0.60494	0.70777	0.89865	0.81948	0.65607	1.0032	0.73862	0.64901	0.91961	0.62236	0.6466	1.0345	0.77547	0.72402	0.8856	0.7822	0.63353	0.90453	0.79106	0.75182	0.97256	0.71967	0.68475	0.9947	0.62045	0.70187	0.91192	0.85051	0.55727	1.0615	0.81449	0.65777	0.99683	0.98755	0.76016	0.78266	1.3794	0.73026
0.89627	0.84052	1.0112	0.66724	0.72028	1.0199	0.40448	0.71551	0.81949	0.76246	0.63615	0.99806	0.63934	0.64648	0.92571	0.88767	0.66033	0.92927	0.71575	0.6457	0.78344	0.63727	0.76765	0.94518	0.77143	0.77196	0.85084	0.77598	0.65665	0.93488	0.82081	0.78459	1.0395	0.78835	0.5862	0.94779	0.63531	0.78452	0.95848	0.82638	0.51732	1.019	0.81457	0.62871	0.96227	1.1004	0.76348	0.64061	1.351	0.66451
0.98348	0.77313	0.94151	0.6522	0.71371	1.3608	0.4127	0.70237	0.91736	0.80338	0.67144	1.0374	0.71558	0.75241	0.84755	0.9611	0.68823	1.1281	0.81096	0.635	0.85049	0.74604	0.76133	1.1125	0.79705	0.74691	0.93157	0.79001	0.6692	0.93657	0.89859	0.84794	1.0357	0.82267	0.57639	1.1128	0.67923	0.81898	1.1022	0.80444	0.57131	1.2053	0.8943	0.71279	0.88029	0.99725	0.80636	0.57281	1.5042	0.61259
0.81161	0.73336	1.0393	0.58325	0.71527	1.1537	0.44393	0.65944	0.86728	0.56052	0.65222	0.75085	0.65054	0.70926	0.91349	0.78792	0.6635	1.0395	0.76739	0.61869	0.89858	0.61329	0.76877	0.97954	0.75544	0.72474	0.87827	0.68896	0.65642	0.84006	0.8139	0.78014	0.83845	0.74602	0.58496	1.0185	0.64001	0.74211	0.92691	0.78681	0.52748	1.0446	0.74483	0.68199	0.89258	0.87741	0.82648	0.68656	1.2759	0.66722
0.89762	0.73206	0.94207	0.75071	0.75319	1.2737	0.49413	0.69205	0.77985	0.62303	0.62315	1.1711	0.68471	0.62933	0.87773	0.95321	0.69432	1.0258	0.7192	0.67183	0.77327	0.70105	0.73283	1.1333	0.92637	0.69936	1.0342	0.78704	0.69596	1.0992	0.84236	0.8579	0.99589	0.80063	0.69551	0.93622	0.67773	0.821	1.1097	0.74707	0.66276	1.0114	0.80067	0.73208	0.97698	1.0393	0.81737	0.72499	1.2934	0.689
0.89198	0.77144	1.0104	0.58775	0.74309	0.9677	0.37283	0.6075	0.82346	0.70621	0.60069	0.62283	0.62978	0.66908	0.86276	0.81662	0.61757	0.91119	0.65427	0.57465	0.80474	0.6044	0.67703	0.87716	0.74189	0.72054	0.75679	0.71342	0.62291	0.7294	0.69435	0.73941	0.85526	0.72536	0.60902	0.92386	0.58663	0.73746	0.84654	0.77109	0.83445	0.92806	0.73319	1.5698	0.88219	0.95372	0.66251	0.62729	1.2702	1.1013
0.91606	0.72067	0.97098	0.57612	0.83276	1.2557	0.32006	0.70316	0.91645	0.66217	0.58548	0.74546	0.63515	0.69759	0.80763	0.96118	0.62927	0.94085	0.69051	0.59234	0.89434	0.54883	0.67194	1.0285	0.74794	0.60236	0.74851	0.73073	0.5445	0.73777	0.69115	0.67838	0.99292	0.6579	0.50209	0.96904	0.51711	0.86199	0.85667	0.79068	0.53862	1.1152	0.67937	0.60421	0.88135	0.96111	0.69767	0.56278	0.95586	0.62594
0.83354	0.73399	0.8834	0.61241	0.71785	1.0401	0.39093	0.65253	0.94842	0.72199	0.58839	0.93894	0.68651	0.63773	0.87878	0.84714	0.63734	1.0529	0.61727	0.60895	0.81113	0.55072	0.6277	0.95513	0.73113	0.66579	0.94446	0.65147	0.67162	0.76046	0.77102	0.78892	0.90595	0.77458	0.66913	0.94115	0.60078	0.62748	0.89387	0.71548	0.81886	1.0342	0.7596	0.93143	1.1133	1.0678	0.59912	0.8339	1.2885	0.96474
0.99831	0.86186	0.97747	0.74147	0.65127	1.0897	0.40401	0.60001	0.9302	0.75189	0.61203	0.76617	0.73119	0.64116	0.9196	0.9204	0.60695	0.8676	0.82474	0.59141	0.92068	0.64258	0.71627	0.88285	0.82028	0.65944	0.77153	0.77661	0.64993	0.75798	0.71079	0.74104	0.93328	0.7929	0.63165	0.8698	0.70893	0.80302	0.89036	0.87182	0.69812	0.95573	0.83852	0.72771	1.023	1.1445	0.69365	0.79355	1.4104	0.81654
0.82345	0.78763	0.94086	0.6989	0.79474	1.2129	0.42738	0.6458	NaN	0.65693	0.58958	0.93442	0.62655	0.69612	0.92348	0.85273	0.60125	0.92187	0.67255	0.64883	0.88115	0.58923	0.70755	1.0953	0.79543	0.79171	0.70703	0.72271	0.66818	0.85989	0.81869	0.73855	0.94699	0.71965	0.7321	0.90026	0.60522	0.84603	0.90534	0.74287	0.73958	0.9787	0.71846	0.85897	0.89624	1.2031	0.65556	0.82324	1.2866	0.79303
0.90364	0.71511	1.0106	0.65967	0.70954	1.1027	0.40043	0.60867	0.92066	0.66301	0.63969	0.84841	0.6284	0.67964	0.91681	0.8384	0.61923	0.88961	0.69456	0.58641	0.81857	0.59976	0.66205	0.92881	0.7574	0.67563	0.76905	0.67902	0.60724	0.88252	0.76727	0.73643	1.0341	0.69991	0.74672	0.92578	0.60177	0.73793	0.99607	0.77516	0.63222	1.0759	0.7215	0.81047	0.99616	1.0746	0.70724	0.7309	1.3428	0.80804
0.85718	0.7541	0.95628	0.60577	0.68389	1.1168	0.38624	0.59198	0.90943	0.69226	0.61508	0.7342	0.62249	0.6585	0.87829	0.82212	0.57434	1.134	0.72171	0.58233	0.83632	0.64485	0.72943	1.1901	0.68249	0.69839	0.8733	0.65432	0.57838	0.76236	0.79105	0.68577	1.0348	0.70815	0.59133	0.94892	0.57802	0.69327	0.958	0.73403	0.59824	1.2162	0.70959	0.67452	1.0753	0.96446	0.72272	0.63922	1.3729	0.6644
0.90949	0.81602	1.023	0.5896	0.74737	1.087	0.41716	0.68138	0.82104	0.6665	0.67932	0.93588	0.59193	0.67122	0.91808	0.81199	0.71152	0.96144	0.68708	0.62422	0.87232	0.60315	0.66804	1.0206	0.73508	0.7166	0.90955	0.70994	0.63112	0.9526	0.78763	0.80556	1.0084	0.79074	0.62515	0.9479	0.59995	0.77494	1.0173	0.75738	0.59918	1.039	0.75548	0.70329	0.92926	1.078	0.76132	0.69008	1.3152	0.69594
1.0307	0.73816	0.97013	0.69821	0.73005	1.2432	0.41122	0.71222	NaN	0.69335	0.57969	0.93317	0.58225	0.71303	1.0385	0.77793	0.6439	1.0152	0.76453	0.69066	0.90143	0.526	0.85866	1.0819	0.77422	0.71952	1.0733	0.73268	0.51075	0.99002	0.85597	0.97543	0.99605	NaN	0.60081	1.119	0.63667	0.71144	1.2221	1.0225	0.62254	1.106	0.96105	0.64156	0.99596	1.1771	0.66877	0.72036	1.4634	0.71997
0.83778	0.73217	0.99488	0.64238	0.75519	1.2632	0.3581	0.64704	0.9816	0.6765	0.65233	0.93638	0.63157	0.6714	0.9126	0.84052	0.63624	0.9557	0.72045	0.58063	0.88305	0.63542	0.68482	1.0341	0.74721	0.70758	0.81009	0.68221	0.61577	0.84624	0.70491	0.75627	0.94771	0.74659	0.56554	0.88746	0.68306	0.70352	0.96892	0.85543	0.54562	1.04	0.72132	0.60174	0.93682	0.98598	0.7499	0.58697	1.339	0.58615
0.8841	0.71932	0.9735	0.58805	0.72499	1.1106	0.35435	0.60804	0.81312	0.63178	0.63927	0.87098	0.62177	0.64137	0.88664	0.76348	0.66129	0.97697	0.68068	0.56296	0.8801	0.53095	0.70401	0.95394	0.74156	0.67456	0.95116	0.68311	0.63206	0.8308	0.75321	0.70174	0.95614	0.78253	0.60535	0.99283	0.64827	0.72957	0.94815	0.78295	0.56991	1.1095	0.76344	0.67693	0.94653	1.0613	0.80618	0.78912	1.3265	0.7264
0.84152	0.82605	0.93795	0.68823	0.74029	1.0278	0.40737	0.68481	1.0949	0.61863	0.7157	0.7875	0.62082	0.65146	1.0387	0.79679	0.68776	NaN	0.71641	0.65823	0.81678	0.61545	0.78165	0.87641	0.71387	0.76832	0.81589	0.7422	0.63394	0.73377	0.77853	0.88409	0.99036	0.77176	0.71729	0.94269	0.6954	0.79705	0.99203	0.84328	0.71733	0.86657	0.81116	0.82435	0.91316	1.3131	0.8061	0.77613	1.1829	0.70523
NaN	1.012	NaN	NaN	0.91575	NaN	NaN	NaN	NaN	NaN	NaN	NaN	NaN	0.72782	NaN	NaN	NaN	NaN	0.88748	NaN	NaN	0.61318	0.75843	NaN	NaN	NaN	NaN	NaN	NaN	NaN	NaN	NaN	NaN	NaN	0.79687	NaN	0.60464	0.78871	NaN	NaN	0.63532	NaN	0.80285	0.87608	NaN	0.95072	NaN	0.73039	NaN	0.77004
NaN	NaN	NaN	NaN	NaN	NaN	NaN	NaN	NaN	NaN	NaN	NaN	NaN	NaN	NaN	NaN	NaN	NaN	NaN	NaN	NaN	NaN	NaN	NaN	NaN	NaN	NaN	NaN	NaN	NaN	NaN	NaN	NaN	NaN	NaN	NaN	NaN	NaN	NaN	NaN	NaN	NaN	NaN	NaN	NaN	NaN	NaN	NaN	NaN	NaN
0.86314	0.76533	0.98238	0.63226	0.74552	1.0994	0.3656	0.65071	0.90607	0.70674	0.65231	0.85637	0.58996	0.67316	0.92868	0.81705	0.64581	0.87404	0.67372	0.65121	0.81469	0.59297	0.69679	0.96482	0.77571	0.69607	0.83353	0.7334	0.59302	0.78093	0.74809	0.80331	0.8936	0.74631	0.5585	0.90452	0.63079	0.77688	0.88193	0.79678	0.5892	1.0098	0.72645	0.60098	0.91568	1.0199	0.71246	0.59844	1.339	0.56957
NaN	NaN	NaN	NaN	NaN	NaN	NaN	NaN	NaN	NaN	NaN	NaN	NaN	NaN	NaN	NaN	NaN	NaN	NaN	NaN	NaN	NaN	NaN	NaN	NaN	NaN	NaN	NaN	NaN	NaN	NaN	NaN	NaN	NaN	NaN	NaN	NaN	NaN	NaN	NaN	NaN	NaN	NaN	NaN	NaN	NaN	NaN	NaN	NaN	NaN
0.86949	0.76232	0.93228	0.60373	0.74416	1.0402	0.35661	0.67825	1.0076	0.79347	0.5935	0.76567	0.67492	0.61975	0.88156	0.81363	0.67128	0.9102	0.76998	0.59251	0.8123	0.66161	0.70189	0.94991	0.77411	0.68354	0.79772	0.78403	0.64773	0.77932	0.787	0.77781	0.9089	0.74967	0.56657	1.0439	0.66253	0.75833	0.9065	0.83837	0.5921	0.97574	0.79319	0.672	0.85683	1.0388	0.72463	0.6313	1.4497	0.63876
NaN	NaN	NaN	NaN	NaN	NaN	NaN	NaN	NaN	NaN	NaN	NaN	NaN	NaN	NaN	NaN	NaN	NaN	NaN	NaN	NaN	NaN	NaN	NaN	NaN	NaN	NaN	NaN	NaN	NaN	NaN	NaN	NaN	NaN	NaN	NaN	NaN	NaN	NaN	NaN	NaN	NaN	NaN	NaN	NaN	NaN	NaN	NaN	NaN	NaN
0.93734	0.87565	0.98667	0.60794	0.88859	1.2486	0.37214	0.69948	1.3849	0.70974	0.92047	1.0092	0.72986	0.75538	0.8876	0.93913	0.69068	1.0777	0.74732	0.7314	0.90262	0.48381	0.84636	1.034	0.77937	0.76031	0.97906	0.83171	0.99806	0.9564	0.89207	0.857	1.0132	0.84224	0.66665	1.0271	0.69253	1.0192	1.0491	0.78478	0.46416	1.1765	0.73737	0.53195	1.0745	1.0856	0.79437	0.9093	1.2682	0.99297
0.81444	0.71687	1.0199	0.62246	0.72865	0.95703	0.36933	0.75948	0.92288	0.62326	0.65883	0.76871	0.5881	0.75261	1.0183	0.8517	0.71468	0.97064	0.70325	0.72669	0.83283	0.56966	0.8261	0.93586	0.80443	0.89545	0.73101	0.7039	0.63566	0.74954	0.7836	1.0299	0.99433	0.79832	0.87435	0.99872	0.64383	0.78858	0.84441	0.78965	0.6916	0.97695	0.72957	0.87068	0.93122	1.1408	0.61954	0.87215	1.3393	0.83139
0.928	0.86395	0.9603	0.67269	0.83355	0.84133	0.33815	0.80361	0.88863	0.68334	0.79576	0.6603	0.7319	0.88241	0.79483	0.91606	0.81717	0.79285	0.78187	0.75455	0.73376	0.7074	0.84987	0.78539	0.7782	0.86754	0.67297	0.70152	0.71401	0.72812	0.87039	0.98709	0.74534	0.74153	0.78737	0.73515	0.60551	0.90026	0.73026	0.7527	0.81594	0.73475	0.71987	0.95223	0.8415	1.3025	0.65508	0.87761	1.1201	0.82003
0.88475	0.75764	0.92697	0.60705	0.74527	1.0261	0.41426	0.66559	0.93693	0.8103	0.66364	0.66399	0.61437	0.67184	0.94111	0.83052	0.65238	0.84241	0.69489	0.65994	0.74218	0.70833	0.73589	0.96699	0.80604	0.74432	0.74881	0.8228	0.64754	0.7886	0.83137	0.87862	0.88931	0.76829	0.63574	0.92448	0.74916	0.7711	0.87305	0.82359	0.59502	0.99766	0.82326	0.69808	0.98634	1.0703	0.71128	0.70262	1.3246	0.62915
0.8255	0.77099	0.98489	0.57831	0.70115	1.2363	0.34818	0.72525	0.94708	0.59228	0.65738	0.88236	0.60866	0.69184	0.89969	0.93051	0.68165	0.83857	0.65613	0.61783	0.96689	0.60301	0.68781	0.9147	0.75148	0.6666	0.83319	0.7351	0.66179	0.82809	0.81436	0.69802	1.0051	0.87225	0.93704	1.033	0.66321	0.87565	0.98701	0.90719	0.61362	1.0901	0.71981	0.79202	0.8657	1.2365	1.078	0.75768	1.398	0.98692
0.92717	0.70367	1.0702	0.62249	0.72956	1.1371	0.42312	0.65039	0.70714	0.72617	0.75158	0.73815	0.6076	0.59238	0.9293	0.83021	0.60624	0.87198	0.67513	0.61695	0.89482	0.71227	0.70249	0.7644	0.77988	0.66941	0.68082	0.73786	0.59975	0.74698	0.82129	0.78998	0.89565	0.75927	0.70445	0.83408	0.73333	0.63538	0.88161	0.88853	0.59057	0.82585	0.80083	0.56818	0.87457	0.89547	0.78342	0.72369	1.1258	0.58122
0.8515	0.72658	0.93405	0.59945	0.67755	1.1099	0.34446	0.64175	0.79864	0.69068	0.60107	0.72039	0.58622	0.61273	0.84175	0.77984	0.59812	0.86498	0.7193	0.57465	0.7753	0.61427	0.65996	0.85522	0.7239	0.64865	0.68588	0.76413	0.59002	0.75618	0.75079	0.70191	0.97241	0.70893	0.65318	0.90831	0.54183	0.67336	0.89491	0.74185	0.62381	0.7872	0.68173	0.67882	0.85578	1.0021	0.67091	0.6607	1.2061	0.68589
NaN	NaN	NaN	NaN	NaN	NaN	NaN	NaN	NaN	NaN	NaN	NaN	NaN	NaN	NaN	NaN	NaN	NaN	NaN	NaN	NaN	NaN	NaN	NaN	NaN	NaN	NaN	NaN	NaN	NaN	NaN	NaN	NaN	NaN	NaN	NaN	NaN	NaN	NaN	NaN	NaN	NaN	NaN	NaN	NaN	NaN	NaN	NaN	NaN	NaN
NaN	NaN	NaN	NaN	NaN	NaN	NaN	NaN	NaN	NaN	NaN	NaN	NaN	NaN	NaN	NaN	NaN	NaN	NaN	NaN	NaN	NaN	NaN	NaN	NaN	NaN	NaN	NaN	NaN	NaN	NaN	NaN	NaN	NaN	NaN	NaN	NaN	NaN	NaN	NaN	NaN	NaN	NaN	NaN	NaN	NaN	NaN	NaN	NaN	NaN
NaN	NaN	NaN	NaN	NaN	NaN	NaN	NaN	NaN	NaN	NaN	NaN	NaN	NaN	NaN	NaN	NaN	NaN	NaN	NaN	NaN	NaN	NaN	NaN	NaN	NaN	NaN	NaN	NaN	NaN	NaN	NaN	NaN	NaN	NaN	NaN	NaN	NaN	NaN	NaN	NaN	NaN	NaN	NaN	NaN	NaN	NaN	NaN	NaN	NaN
NaN	NaN	NaN	NaN	NaN	NaN	NaN	NaN	NaN	NaN	NaN	NaN	NaN	NaN	NaN	NaN	NaN	NaN	NaN	NaN	NaN	NaN	NaN	NaN	NaN	NaN	NaN	NaN	NaN	NaN	NaN	NaN	NaN	NaN	NaN	NaN	NaN	NaN	NaN	NaN	NaN	NaN	NaN	NaN	NaN	NaN	NaN	NaN	NaN	NaN
NaN	NaN	NaN	NaN	NaN	NaN	NaN	NaN	NaN	NaN	NaN	NaN	NaN	NaN	NaN	NaN	NaN	NaN	NaN	NaN	NaN	NaN	NaN	NaN	NaN	NaN	NaN	NaN	NaN	NaN	NaN	NaN	NaN	NaN	NaN	NaN	NaN	NaN	NaN	NaN	NaN	NaN	NaN	NaN	NaN	NaN	NaN	NaN	NaN	NaN
NaN	NaN	NaN	NaN	NaN	NaN	NaN	NaN	NaN	NaN	NaN	NaN	NaN	NaN	NaN	NaN	NaN	NaN	NaN	NaN	NaN	NaN	NaN	NaN	NaN	NaN	NaN	NaN	NaN	NaN	NaN	NaN	NaN	NaN	NaN	NaN	NaN	NaN	NaN	NaN	NaN	NaN	NaN	NaN	NaN	NaN	NaN	NaN	NaN	NaN
NaN	NaN	NaN	NaN	NaN	NaN	NaN	NaN	NaN	NaN	NaN	NaN	NaN	NaN	NaN	NaN	NaN	NaN	NaN	NaN	NaN	NaN	NaN	NaN	NaN	NaN	NaN	NaN	NaN	NaN	NaN	NaN	NaN	NaN	NaN	NaN	NaN	NaN	NaN	NaN	NaN	NaN	NaN	NaN	NaN	NaN	NaN	NaN	NaN	NaN
NaN	0.71852	NaN	NaN	NaN	NaN	NaN	NaN	NaN	NaN	0.63188	NaN	NaN	0.74628	NaN	1.1056	0.66649	NaN	NaN	0.55816	NaN	NaN	NaN	NaN	NaN	0.68331	NaN	NaN	0.74924	NaN	NaN	0.77274	NaN	NaN	0.50141	NaN	NaN	0.68196	NaN	NaN	0.48791	NaN	NaN	0.59034	NaN	NaN	NaN	0.60048	NaN	0.42628
NaN	NaN	NaN	NaN	NaN	NaN	NaN	NaN	NaN	NaN	NaN	1.3589	NaN	0.18053	NaN	NaN	0.81847	NaN	NaN	NaN	NaN	NaN	NaN	NaN	NaN	0.6287	NaN	NaN	NaN	1.1176	0.98694	NaN	1.0425	NaN	NaN	NaN	NaN	NaN	NaN	NaN	NaN	NaN	NaN	0.54948	NaN	NaN	NaN	NaN	NaN	0.55397
NaN	NaN	NaN	NaN	NaN	NaN	NaN	NaN	NaN	NaN	NaN	NaN	NaN	NaN	NaN	NaN	NaN	NaN	NaN	NaN	NaN	NaN	NaN	NaN	NaN	NaN	NaN	NaN	NaN	NaN	NaN	NaN	NaN	NaN	NaN	NaN	NaN	NaN	NaN	NaN	NaN	NaN	NaN	NaN	NaN	NaN	NaN	NaN	NaN	NaN
NaN	NaN	NaN	NaN	NaN	NaN	NaN	NaN	NaN	NaN	NaN	NaN	NaN	NaN	NaN	NaN	NaN	NaN	NaN	NaN	NaN	NaN	NaN	NaN	NaN	NaN	NaN	NaN	NaN	NaN	NaN	NaN	NaN	NaN	NaN	NaN	NaN	NaN	NaN	NaN	NaN	NaN	NaN	NaN	NaN	NaN	NaN	NaN	NaN	NaN
NaN	NaN	NaN	NaN	NaN	NaN	NaN	NaN	NaN	NaN	NaN	NaN	NaN	NaN	NaN	NaN	NaN	NaN	NaN	NaN	NaN	NaN	NaN	NaN	NaN	NaN	NaN	NaN	NaN	NaN	NaN	NaN	NaN	NaN	NaN	NaN	NaN	NaN	NaN	NaN	NaN	NaN	NaN	NaN	NaN	NaN	NaN	NaN	NaN	NaN
0.97069	0.80745	0.83887	0.71441	0.71317	1.0613	0.45349	0.8279	1.0041	1.1129	0.6513	0.82255	0.87285	0.67604	1.0044	0.97	0.83595	0.80804	0.82862	0.56965	0.76163	1.019	0.53511	0.99955	0.82856	0.70876	0.62886	0.95968	0.72624	0.83185	0.97246	0.63977	0.77528	0.86461	0.54312	0.85335	0.65121	0.64905	0.74066	0.76173	0.487	0.90633	0.70782	0.58621	0.73773	0.84786	0.59753	0.6452	1.2273	0.50971
1.019	0.90958	0.99756	NaN	0.89416	0.92315	0.46859	0.76414	NaN	0.68972	0.72068	NaN	0.79783	0.69208	0.9097	0.82927	0.55602	NaN	0.89579	0.65977	NaN	NaN	0.74274	NaN	0.91776	0.63569	NaN	0.87136	0.80499	0.87321	1.0672	0.81138	NaN	0.78415	1.0208	NaN	NaN	0.68019	NaN	0.95192	1.2034	NaN	0.82073	1.1386	NaN	1.3937	NaN	0.93455	NaN	1.0898
NaN	NaN	NaN	NaN	NaN	NaN	NaN	NaN	NaN	2.1194	NaN	NaN	NaN	NaN	NaN	NaN	NaN	NaN	NaN	NaN	NaN	NaN	NaN	NaN	NaN	NaN	NaN	NaN	NaN	NaN	NaN	NaN	NaN	NaN	NaN	NaN	NaN	NaN	NaN	NaN	NaN	NaN	NaN	NaN	NaN	NaN	NaN	NaN	NaN	NaN
NaN	NaN	1.0018	NaN	NaN	NaN	NaN	NaN	NaN	NaN	NaN	NaN	NaN	NaN	NaN	NaN	NaN	NaN	NaN	NaN	NaN	NaN	NaN	NaN	NaN	NaN	NaN	NaN	NaN	NaN	NaN	NaN	NaN	NaN	NaN	NaN	NaN	NaN	NaN	NaN	NaN	NaN	NaN	NaN	NaN	NaN	NaN	NaN	NaN	NaN
NaN	NaN	0.89866	0.71147	NaN	NaN	0.37116	NaN	NaN	1.8107	NaN	NaN	NaN	NaN	NaN	1.2098	NaN	NaN	NaN	0.6835	NaN	1.2108	NaN	NaN	NaN	NaN	NaN	0.68655	NaN	NaN	NaN	NaN	NaN	NaN	NaN	NaN	0.61086	NaN	NaN	0.50647	NaN	NaN	0.35973	NaN	NaN	NaN	NaN	NaN	NaN	NaN
NaN	0.7503	NaN	NaN	NaN	NaN	0.41136	0.68545	NaN	0.66273	NaN	NaN	NaN	NaN	NaN	NaN	NaN	NaN	0.66391	NaN	NaN	0.5425	0.99954	NaN	NaN	NaN	NaN	0.72102	0.6771	NaN	0.83118	NaN	NaN	0.77136	NaN	NaN	0.58819	NaN	NaN	0.79912	NaN	NaN	0.72539	NaN	NaN	NaN	NaN	NaN	NaN	NaN
1.0418	NaN	1.1578	1.1188	NaN	1.4015	0.65128	NaN	0.85216	2.1561	NaN	1.0455	0.95134	0.50534	1.1021	1.1267	NaN	1.0316	0.91153	0.59152	1.1553	2.5932	0.59302	1.2155	0.939	0.50362	1.0377	1.1926	0.46419	0.83595	0.98062	0.58068	1.051	0.94004	0.4533	1.1526	0.85492	0.42764	1.061	0.91168	NaN	1.1959	0.6871	NaN	0.89797	0.55634	0.87073	0.36123	1.5104	0.3762
1.053	0.71409	1.1444	0.5754	0.52811	1.2127	0.44919	0.69584	1.0442	0.98791	0.54744	0.92161	0.74286	0.4945	1.0818	NaN	NaN	0.94691	1.0329	0.47433	0.87467	NaN	0.79147	0.99797	0.52515	0.52957	0.91373	0.87027	0.64042	0.73753	0.83	0.62363	1.0315	0.85884	0.73357	0.94791	0.72891	0.59401	0.8941	0.7973	0.86007	0.96494	0.81047	1.1704	1.0022	1.2375	0.74552	0.70305	1.1188	1.1648
0.98074	1.1302	0.93396	0.92746	0.63878	1.5544	0.49364	NaN	0.77245	0.70925	NaN	1.2479	0.97747	0.66677	NaN	0.8813	0.85514	0.95177	0.75494	NaN	1.0193	0.62591	0.71113	1.182	0.76634	0.93738	1.0354	0.74159	0.71731	0.89648	0.779	1.0086	NaN	0.77426	1.069	0.98105	0.74374	NaN	0.94277	0.91322	1.0678	1.1015	0.75125	0.84508	0.93148	1.9084	0.78742	0.98224	1.2174	1.2811
0.92008	0.74895	1.1806	0.62945	0.67861	1.1035	0.35413	0.61298	NaN	0.70959	0.58749	0.7956	0.61385	0.64556	NaN	0.90013	0.63935	0.9283	0.69991	0.57799	0.77296	0.60471	0.75729	0.88738	0.77903	0.70594	0.72356	0.7448	0.56127	0.54454	0.8101	0.77982	0.85865	0.74689	0.63998	1.1581	0.64936	0.76555	0.75646	0.89134	0.59202	NaN	0.79738	0.73148	NaN	1.039	0.54474	0.7109	1.1515	0.63195
NaN	NaN	NaN	NaN	NaN	NaN	NaN	NaN	NaN	NaN	NaN	NaN	NaN	NaN	NaN	NaN	NaN	NaN	NaN	NaN	NaN	NaN	NaN	NaN	NaN	NaN	NaN	NaN	NaN	NaN	NaN	NaN	NaN	NaN	NaN	NaN	NaN	NaN	NaN	NaN	NaN	NaN	NaN	NaN	NaN	NaN	NaN	NaN	NaN	NaN
0.91094	NaN	1.0248	0.71905	0.75763	0.98847	0.35176	0.70172	NaN	0.75494	NaN	NaN	0.58477	0.69106	1.0549	0.92328	0.76185	1.1246	0.92542	0.47131	0.94384	0.68084	0.57734	1.2431	0.67273	0.61406	0.88562	0.78069	0.55849	0.8848	0.8117	0.75414	0.93111	0.7734	0.53847	1.1951	0.53585	0.53517	NaN	0.76073	0.57032	0.93043	0.83868	0.60137	1.1014	1.0168	0.74932	0.64591	NaN	0.59805
NaN	NaN	NaN	NaN	NaN	NaN	NaN	NaN	NaN	NaN	NaN	NaN	NaN	NaN	NaN	NaN	NaN	NaN	NaN	NaN	NaN	NaN	NaN	NaN	NaN	NaN	NaN	NaN	NaN	NaN	NaN	NaN	NaN	NaN	NaN	NaN	NaN	NaN	NaN	NaN	NaN	NaN	NaN	NaN	NaN	NaN	NaN	NaN	NaN	NaN
0.90699	0.87858	0.90315	0.67515	0.78924	0.99955	0.38641	0.74324	0.99974	0.71447	0.80109	0.79809	0.67582	0.85881	0.89504	0.85005	0.76452	0.96543	0.73806	0.62617	0.85857	0.61569	0.74422	1.0103	0.74734	0.8241	0.85679	0.69591	0.66832	0.79287	0.77566	0.93674	0.87715	0.77699	0.8536	0.97567	0.58655	0.83186	0.96263	0.78475	0.97481	0.91985	0.77912	0.94223	0.92476	1.3149	0.7376	1.0129	1.305	0.98062
NaN	NaN	NaN	NaN	NaN	NaN	NaN	NaN	NaN	NaN	NaN	NaN	NaN	NaN	NaN	NaN	NaN	NaN	NaN	NaN	NaN	NaN	NaN	NaN	NaN	NaN	NaN	NaN	NaN	NaN	NaN	NaN	NaN	NaN	NaN	NaN	NaN	NaN	NaN	NaN	NaN	NaN	NaN	NaN	NaN	NaN	NaN	NaN	NaN	NaN
NaN	NaN	NaN	NaN	NaN	NaN	NaN	NaN	NaN	NaN	NaN	NaN	NaN	NaN	NaN	NaN	NaN	NaN	NaN	NaN	NaN	NaN	NaN	NaN	NaN	NaN	NaN	NaN	NaN	NaN	NaN	NaN	NaN	NaN	NaN	NaN	NaN	NaN	NaN	NaN	NaN	NaN	NaN	NaN	NaN	NaN	NaN	NaN	NaN	NaN
1.4822	0.94794	NaN	0.73597	1.1968	1.9969	0.34247	1.5542	NaN	0.64311	0.55449	NaN	0.60331	0.64516	NaN	NaN	0.70069	NaN	1.5819	NaN	0.62928	1.1512	0.82275	NaN	NaN	NaN	NaN	0.61224	0.5844	NaN	NaN	NaN	NaN	NaN	NaN	NaN	NaN	NaN	NaN	NaN	NaN	NaN	NaN	NaN	NaN	1.1006	NaN	0.74213	NaN	NaN
0.88655	0.91755	1.4026	0.81456	1.2039	NaN	0.47147	NaN	NaN	0.6908	0.70047	0.70119	0.60435	0.88059	NaN	0.84515	NaN	NaN	1.1279	0.39795	NaN	NaN	0.71228	NaN	NaN	0.90247	NaN	1.0558	0.70247	NaN	0.87019	0.92356	NaN	0.65209	2.2671	NaN	NaN	1.0911	NaN	0.78673	1.234	NaN	NaN	1.0516	NaN	1.2239	NaN	1.4253	NaN	1.0426
NaN	NaN	NaN	NaN	NaN	NaN	NaN	NaN	0.99285	NaN	NaN	NaN	NaN	NaN	1.3102	NaN	0.68127	NaN	NaN	NaN	NaN	NaN	NaN	NaN	NaN	NaN	NaN	NaN	NaN	0.84425	NaN	NaN	NaN	NaN	NaN	NaN	NaN	NaN	NaN	NaN	NaN	NaN	NaN	NaN	NaN	NaN	0.75601	NaN	NaN	NaN
0.91425	0.83454	0.9151	0.61436	0.58037	NaN	0.31589	0.70126	0.97149	0.68815	0.59718	0.70457	0.61068	0.66516	0.87503	0.76575	0.57561	0.84518	0.79156	0.56937	NaN	0.58837	0.66554	0.83666	0.73831	0.63223	NaN	0.72252	0.5198	0.78604	0.80127	0.70147	0.91049	0.67879	0.74596	0.8854	0.60534	0.63227	0.8207	0.80985	0.72441	0.81824	0.80781	0.7821	0.86849	1.0296	0.76396	0.91312	NaN	0.84513
NaN	NaN	NaN	NaN	NaN	NaN	NaN	NaN	NaN	NaN	NaN	NaN	NaN	NaN	NaN	NaN	NaN	NaN	NaN	NaN	NaN	NaN	NaN	NaN	NaN	NaN	NaN	NaN	NaN	NaN	NaN	NaN	NaN	NaN	NaN	NaN	NaN	NaN	NaN	NaN	NaN	NaN	NaN	NaN	NaN	NaN	NaN	NaN	NaN	NaN
NaN	NaN	NaN	0.73159	NaN	NaN	NaN	NaN	NaN	0.82574	NaN	NaN	NaN	NaN	NaN	NaN	NaN	NaN	NaN	NaN	NaN	NaN	NaN	NaN	NaN	NaN	NaN	NaN	0.6538	NaN	1.0526	NaN	NaN	NaN	0.39818	NaN	0.69045	NaN	NaN	0.89564	NaN	NaN	0.95471	NaN	NaN	NaN	NaN	NaN	NaN	NaN
NaN	NaN	NaN	NaN	NaN	NaN	NaN	NaN	0.94028	NaN	NaN	NaN	NaN	NaN	NaN	NaN	NaN	NaN	NaN	NaN	NaN	NaN	NaN	NaN	NaN	NaN	NaN	NaN	NaN	NaN	NaN	NaN	NaN	NaN	NaN	NaN	NaN	NaN	NaN	NaN	NaN	NaN	NaN	NaN	NaN	NaN	NaN	NaN	NaN	NaN
NaN	NaN	NaN	NaN	NaN	NaN	NaN	NaN	NaN	NaN	NaN	NaN	NaN	NaN	NaN	NaN	NaN	NaN	NaN	NaN	NaN	NaN	NaN	NaN	0.92159	NaN	NaN	NaN	NaN	NaN	NaN	NaN	NaN	1.0106	NaN	NaN	NaN	NaN	NaN	NaN	NaN	NaN	NaN	NaN	NaN	NaN	NaN	NaN	NaN	NaN
NaN	NaN	0.86765	NaN	NaN	NaN	NaN	NaN	NaN	NaN	NaN	0.88519	NaN	NaN	0.93322	NaN	NaN	NaN	NaN	NaN	NaN	NaN	NaN	NaN	NaN	NaN	NaN	NaN	NaN	0.98394	NaN	NaN	0.89408	NaN	NaN	NaN	NaN	NaN	NaN	NaN	NaN	NaN	NaN	NaN	1.0554	NaN	NaN	NaN	1.4834	NaN
0.88152	0.69857	1.0792	0.58202	0.68209	1.2073	0.35445	0.59215	0.88423	0.76611	0.59922	0.888	0.55911	0.6702	1.1609	0.79542	0.61889	1.0457	0.65036	0.64065	0.88033	0.69326	0.68017	0.98479	0.71971	0.68897	0.84358	0.71635	0.5509	0.78491	0.7265	0.77762	0.86629	0.77516	0.54189	0.99437	0.67106	0.72698	1.0382	0.81669	0.61228	0.92386	0.74699	0.66961	1.0106	1.0132	0.63837	0.66645	1.3406	0.67269
1.2113	NaN	0.98461	0.89727	NaN	1.3555	0.49447	NaN	1.0039	2.1642	NaN	0.9438	0.95301	NaN	0.85159	1.1864	NaN	0.72298	NaN	NaN	0.80192	2.6925	1.4779	1.1476	0.86105	NaN	0.65041	1.097	NaN	0.60821	1.0309	NaN	0.70222	1.0182	NaN	1.1194	0.89502	NaN	NaN	0.89115	NaN	1.1666	NaN	NaN	0.95417	NaN	0.61929	NaN	1.3936	NaN
NaN	NaN	NaN	NaN	NaN	NaN	NaN	NaN	NaN	NaN	NaN	NaN	NaN	NaN	NaN	NaN	NaN	NaN	NaN	NaN	NaN	NaN	NaN	NaN	NaN	NaN	NaN	NaN	NaN	NaN	NaN	NaN	NaN	NaN	NaN	NaN	NaN	NaN	NaN	NaN	NaN	NaN	NaN	NaN	NaN	NaN	NaN	NaN	NaN	NaN
0.86697	0.78799	1.0199	0.65986	0.74892	1.1345	0.38682	0.67174	0.96285	0.65361	0.63948	0.93666	0.61632	0.63536	0.88313	0.86455	0.64386	0.95621	0.67189	0.62141	0.80804	0.57083	0.72588	0.98684	0.75213	0.73914	0.75238	0.71029	0.64224	0.77306	0.80502	0.76406	0.9593	0.72588	0.69389	0.89348	0.63556	0.74096	0.95077	0.79104	0.6482	0.87507	0.71554	0.70233	0.77331	1.024	0.66702	0.70749	1.001	0.65329
0.91025	0.84038	1.0145	0.69509	0.76223	1.0263	0.41481	0.66582	0.95878	0.72801	0.65589	0.84258	0.65893	0.68042	0.94808	0.86921	0.65343	0.92101	0.76724	0.62044	0.8672	0.65069	0.69949	0.95493	0.77293	0.72578	0.85794	0.73166	0.7061	0.77753	0.78744	0.77473	0.92553	0.78042	0.66913	0.89411	0.64673	0.76692	0.91176	0.86991	0.70223	0.96615	0.74921	0.75755	0.93641	1.0849	0.7299	0.70922	1.2545	0.74001
0.9171	0.74838	NaN	0.60766	0.84222	NaN	0.37363	NaN	NaN	0.61497	0.79675	NaN	0.59544	NaN	NaN	0.83433	NaN	NaN	0.69803	NaN	NaN	0.59434	NaN	NaN	0.62241	NaN	NaN	0.82247	0.82688	NaN	0.80915	0.97667	NaN	0.69452	NaN	NaN	0.69585	NaN	NaN	0.7379	NaN	NaN	0.65728	NaN	NaN	1.1051	NaN	NaN	NaN	NaN
0.94404	0.7051	0.98457	0.69083	0.65984	0.75243	0.40048	0.70555	0.9317	0.67055	0.53549	NaN	0.6546	0.46797	1.0051	0.8285	0.51895	0.82465	0.71745	0.51587	0.75482	0.80244	0.46767	0.87218	0.73778	NaN	0.74488	0.85168	0.43767	0.77213	0.69008	0.85284	NaN	0.79905	0.61579	NaN	0.69818	NaN	1.0735	0.82022	0.69041	1.0498	0.80055	0.60339	0.83986	1.0728	0.76223	0.6092	1.2623	0.66143
0.88554	NaN	NaN	0.60423	0.68728	NaN	0.34517	0.54247	NaN	0.75186	0.6614	NaN	0.59491	0.5904	NaN	NaN	0.54033	NaN	0.65039	0.63586	NaN	0.6466	0.80304	NaN	0.79534	0.74244	NaN	0.58363	NaN	NaN	0.80998	NaN	NaN	0.89963	0.72641	NaN	0.60169	NaN	NaN	0.83586	NaN	NaN	0.69885	0.7902	NaN	1.0179	NaN	NaN	NaN	0.58464
NaN	NaN	NaN	NaN	NaN	NaN	NaN	NaN	NaN	NaN	NaN	NaN	NaN	NaN	NaN	NaN	NaN	NaN	NaN	NaN	NaN	NaN	NaN	NaN	NaN	NaN	NaN	NaN	NaN	NaN	NaN	NaN	NaN	NaN	NaN	NaN	NaN	NaN	NaN	NaN	NaN	NaN	NaN	NaN	NaN	NaN	NaN	NaN	NaN	NaN
NaN	0.78129	0.89739	NaN	NaN	1.2402	NaN	0.57075	NaN	0.9165	0.67861	0.71336	NaN	0.60514	NaN	NaN	0.54837	0.72213	0.62855	0.89029	NaN	0.70533	0.6522	NaN	0.94471	NaN	NaN	0.83679	0.58626	NaN	0.78743	0.66451	NaN	0.8349	NaN	NaN	0.94691	0.52554	NaN	0.63161	NaN	NaN	0.66224	0.65253	NaN	NaN	NaN	NaN	NaN	0.83866
0.73476	0.89028	1.3416	0.53815	1.1388	NaN	NaN	NaN	0.60593	0.47832	NaN	0.83369	0.58331	0.83833	0.73381	0.87386	0.63591	1.123	0.74751	NaN	NaN	0.53536	1.0461	1.2825	0.92608	NaN	NaN	0.63	NaN	NaN	0.71979	0.86886	0.96657	0.72681	0.55078	NaN	0.53995	1.0516	1.3661	NaN	0.97094	1.3492	0.71028	0.84251	NaN	NaN	0.87101	1.074	1.3613	NaN
NaN	NaN	NaN	NaN	NaN	NaN	NaN	NaN	NaN	NaN	NaN	NaN	NaN	NaN	NaN	NaN	NaN	NaN	NaN	NaN	NaN	NaN	NaN	NaN	NaN	NaN	NaN	NaN	NaN	NaN	NaN	NaN	NaN	NaN	NaN	NaN	NaN	NaN	NaN	NaN	NaN	NaN	NaN	NaN	NaN	NaN	NaN	NaN	NaN	NaN
0.71555	0.71829	1.0732	1.415	0.80461	NaN	NaN	0.58101	NaN	NaN	0.51272	0.95906	1.2342	0.6491	NaN	0.34085	NaN	NaN	0.72599	0.42185	NaN	0.52473	1.8878	NaN	0.75612	0.45406	NaN	0.62316	0.7772	NaN	0.56182	NaN	NaN	0.74204	0.85242	NaN	0.5666	0.7996	NaN	1.0113	0.72223	NaN	0.73903	0.81155	NaN	1.1825	NaN	0.83901	NaN	NaN
NaN	NaN	NaN	NaN	NaN	NaN	NaN	NaN	NaN	NaN	NaN	NaN	NaN	NaN	NaN	NaN	NaN	NaN	NaN	NaN	NaN	NaN	NaN	NaN	NaN	NaN	NaN	NaN	NaN	NaN	NaN	NaN	NaN	NaN	NaN	NaN	NaN	NaN	NaN	NaN	NaN	NaN	NaN	NaN	NaN	NaN	NaN	NaN	NaN	NaN
0.5	NaN	NaN	NaN	NaN	NaN	NaN	NaN	NaN	NaN	NaN	NaN	NaN	NaN	NaN	NaN	NaN	NaN	NaN	NaN	NaN	NaN	NaN	NaN	NaN	NaN	NaN	NaN	NaN	NaN	NaN	NaN	NaN	NaN	NaN	NaN	NaN	NaN	NaN	NaN	NaN	NaN	NaN	NaN	NaN	NaN	NaN	NaN	NaN	NaN
NaN	NaN	NaN	NaN	NaN	NaN	NaN	NaN	NaN	NaN	NaN	NaN	NaN	NaN	NaN	NaN	NaN	NaN	NaN	NaN	NaN	NaN	NaN	NaN	NaN	NaN	NaN	NaN	NaN	NaN	NaN	NaN	NaN	NaN	NaN	NaN	NaN	NaN	NaN	NaN	NaN	NaN	NaN	NaN	NaN	NaN	NaN	NaN	NaN	NaN
NaN	NaN	NaN	NaN	NaN	NaN	NaN	NaN	NaN	NaN	NaN	NaN	NaN	NaN	NaN	NaN	NaN	NaN	NaN	NaN	NaN	NaN	NaN	NaN	NaN	NaN	NaN	NaN	NaN	NaN	NaN	NaN	NaN	NaN	NaN	NaN	NaN	NaN	NaN	0.46759	NaN	NaN	NaN	NaN	NaN	NaN	NaN	NaN	NaN	NaN
NaN	NaN	NaN	NaN	NaN	NaN	NaN	NaN	NaN	NaN	NaN	NaN	NaN	NaN	NaN	NaN	NaN	NaN	NaN	NaN	NaN	NaN	NaN	NaN	NaN	NaN	NaN	NaN	NaN	NaN	NaN	NaN	NaN	NaN	NaN	NaN	NaN	NaN	NaN	NaN	NaN	NaN	NaN	NaN	NaN	NaN	NaN	NaN	NaN	NaN
NaN	NaN	NaN	NaN	NaN	NaN	NaN	NaN	NaN	NaN	NaN	NaN	NaN	NaN	NaN	NaN	NaN	NaN	NaN	NaN	NaN	NaN	NaN	NaN	NaN	NaN	NaN	NaN	NaN	NaN	NaN	NaN	NaN	NaN	NaN	NaN	NaN	NaN	NaN	NaN	NaN	NaN	NaN	NaN	NaN	NaN	NaN	NaN	NaN	NaN
0.78698	0.7353	1.2449	0.68017	0.57885	1.6139	0.31771	0.4692	0.95081	1.345	0.65178	1.2196	0.73235	0.66012	1.047	0.95956	0.49282	1.2032	1.0435	0.55448	NaN	1.6579	0.68338	1.2765	0.76716	0.48499	1.4737	0.77979	0.53682	1.0031	0.84534	0.73269	0.96731	0.82985	0.44465	1.0648	0.56855	0.52069	1.2462	0.57703	0.43437	1.2237	0.66516	0.43437	0.98954	0.69712	0.82871	0.60734	NaN	0.84084
NaN	NaN	0.98277	0.82612	NaN	0.7035	NaN	NaN	1.1531	NaN	NaN	0.72331	NaN	NaN	0.79986	NaN	NaN	NaN	NaN	NaN	0.88795	2.1338	NaN	0.95195	NaN	NaN	0.64254	NaN	NaN	NaN	NaN	NaN	NaN	0.90513	NaN	0.85374	NaN	NaN	NaN	NaN	NaN	NaN	NaN	NaN	NaN	NaN	0.67908	NaN	1.3803	NaN
0.91566	0.79361	0.95449	0.66607	0.74851	1.383	0.35245	0.66686	0.66625	0.75039	0.6848	0.96976	0.64352	0.67401	1.4025	0.81722	0.66081	1.137	0.7715	0.58442	1.0017	0.58541	0.68852	1.1592	0.71094	0.68023	0.97939	0.79418	0.70934	1.0394	0.81314	0.88962	1.0727	0.77909	0.67249	1.1985	0.622	0.72135	1.1	0.76315	0.61498	1.1647	0.81004	0.72067	1.0208	0.79875	0.7659	0.6409	1.5002	0.57087
NaN	NaN	NaN	NaN	NaN	NaN	NaN	NaN	NaN	NaN	NaN	NaN	NaN	NaN	NaN	NaN	NaN	NaN	NaN	NaN	NaN	NaN	NaN	NaN	NaN	NaN	NaN	NaN	NaN	NaN	NaN	NaN	NaN	NaN	NaN	NaN	NaN	NaN	NaN	NaN	NaN	NaN	NaN	NaN	NaN	NaN	NaN	NaN	NaN	NaN
NaN	NaN	NaN	NaN	NaN	NaN	NaN	NaN	NaN	NaN	NaN	NaN	NaN	NaN	NaN	NaN	NaN	NaN	NaN	NaN	NaN	NaN	NaN	0.96066	0.9444	NaN	NaN	0.93515	NaN	NaN	NaN	NaN	NaN	0.62713	NaN	NaN	NaN	NaN	NaN	NaN	NaN	NaN	NaN	NaN	NaN	NaN	NaN	NaN	NaN	NaN
1.2693	0.66387	NaN	NaN	1.1762	NaN	0.40573	0.8139	NaN	1.2931	0.638	NaN	NaN	0.78531	NaN	NaN	0.82977	NaN	NaN	NaN	NaN	NaN	NaN	NaN	NaN	0.81852	NaN	NaN	NaN	NaN	NaN	0.90463	NaN	1.116	0.621	NaN	NaN	0.80871	NaN	NaN	0.56738	0.78162	NaN	0.72086	NaN	1.1094	NaN	0.74342	NaN	0.71266
NaN	NaN	NaN	0.4952	NaN	NaN	NaN	NaN	NaN	2.5116	NaN	NaN	NaN	NaN	NaN	NaN	NaN	NaN	NaN	NaN	NaN	1.9836	NaN	NaN	NaN	NaN	NaN	0.86586	NaN	NaN	1.1233	NaN	NaN	NaN	NaN	NaN	0.57385	NaN	NaN	NaN	NaN	0.59761	0.5985	NaN	NaN	NaN	NaN	NaN	NaN	NaN
0.80413	0.70276	NaN	0.56941	0.63035	NaN	0.33645	0.63544	0.99263	NaN	0.57571	NaN	0.55858	0.66561	0.76979	0.95049	0.64515	0.62709	0.67347	NaN	0.69795	0.71374	NaN	0.87224	0.65085	0.65081	NaN	0.7679	NaN	0.78714	0.76498	0.76268	0.70668	0.81484	0.5098	NaN	0.60425	0.6603	NaN	NaN	0.50221	0.85637	0.55861	0.7541	0.84951	0.89047	0.51458	0.50048	1.2965	0.67309
1.4395	NaN	NaN	NaN	NaN	NaN	NaN	NaN	NaN	2.2285	NaN	NaN	NaN	1.2072	NaN	NaN	0.66919	NaN	NaN	1.4189	NaN	2.2653	1.3339	NaN	NaN	NaN	NaN	1.1641	0.85733	NaN	NaN	NaN	NaN	NaN	NaN	NaN	NaN	NaN	NaN	NaN	NaN	NaN	NaN	NaN	NaN	NaN	NaN	NaN	NaN	NaN
0.84607	0.80067	1.1279	0.70565	0.71897	0.99391	0.39885	0.68596	1.031	0.63373	0.79421	1.0853	0.78052	0.71505	0.90913	0.79	0.74284	0.9527	0.9833	0.60924	0.88882	0.65288	0.71172	1.1016	0.97182	0.74055	0.8041	0.81678	0.67271	0.77496	0.76027	0.85942	0.93097	0.7385	0.64429	1.1424	0.65293	0.72826	0.95477	0.84066	0.59303	0.99077	0.72821	0.7002	0.97586	1.0997	0.74878	0.61008	1.2853	0.68122
0.91168	0.66016	0.98154	0.63563	0.71343	1.046	0.38041	0.64501	0.92076	0.59971	0.59225	0.88345	0.56906	0.62535	0.88862	0.85091	0.55993	0.90615	0.72047	0.53725	0.84811	0.56361	0.67599	0.9167	0.69934	0.6824	0.76194	0.70421	0.58362	0.7274	0.69975	0.73092	0.89808	0.71025	0.63888	0.92089	0.60375	0.70455	0.96564	0.75342	0.67297	0.94449	0.74038	0.74138	0.89334	0.99985	0.6668	0.72166	1.4112	0.74043
0.87771	0.74431	1.006	0.55725	0.74995	1.0369	0.32755	0.62251	0.79193	0.63206	0.64734	0.91387	0.55569	0.61854	0.97011	0.69504	0.6335	0.89759	0.63686	0.56463	0.82642	0.55468	0.60572	1.0341	0.63607	0.64085	0.83483	0.63651	0.56139	0.90832	0.65367	0.67712	0.81533	0.65852	0.47736	0.91045	0.56441	0.65804	0.9635	0.7026	0.51206	1.1247	0.67816	0.58142	0.86144	0.91999	0.80569	0.57192	1.3904	0.60579
0.85844	0.74199	0.98365	0.69653	0.74838	1.2487	0.39233	0.68	0.93491	0.72279	0.66552	0.79042	0.58314	0.67376	1.0171	0.84215	0.72319	0.7329	0.77259	0.7527	0.98931	0.56159	0.8057	0.89865	0.72857	0.7898	1.0348	0.73961	0.64106	0.89078	0.75917	0.85927	1.0468	0.80584	0.71791	0.87808	0.65107	0.81207	0.78446	0.79393	0.5928	0.81095	0.74356	0.73073	0.76205	1.0927	0.65837	1.0752	1.3622	0.95152
NaN	NaN	NaN	NaN	NaN	NaN	NaN	NaN	NaN	NaN	NaN	NaN	NaN	NaN	NaN	NaN	NaN	NaN	NaN	NaN	NaN	NaN	0.61404	NaN	NaN	NaN	NaN	NaN	NaN	NaN	NaN	1.0453	NaN	NaN	0.48612	NaN	NaN	0.69711	NaN	NaN	NaN	NaN	0.59483	NaN	NaN	0.93915	NaN	NaN	NaN	NaN
NaN	NaN	NaN	NaN	NaN	NaN	NaN	NaN	NaN	NaN	NaN	NaN	NaN	NaN	NaN	NaN	NaN	NaN	NaN	NaN	NaN	NaN	NaN	NaN	NaN	NaN	NaN	NaN	NaN	NaN	NaN	NaN	NaN	NaN	NaN	NaN	NaN	NaN	NaN	NaN	NaN	NaN	NaN	NaN	NaN	NaN	NaN	NaN	NaN	NaN
NaN	NaN	NaN	NaN	NaN	NaN	NaN	NaN	NaN	NaN	NaN	NaN	NaN	NaN	NaN	NaN	NaN	NaN	NaN	NaN	NaN	NaN	NaN	NaN	NaN	NaN	NaN	NaN	NaN	NaN	NaN	NaN	NaN	NaN	NaN	NaN	NaN	NaN	NaN	NaN	NaN	NaN	NaN	NaN	NaN	NaN	NaN	NaN	NaN	NaN
0.88425	0.80691	0.97617	0.53956	0.39586	1.5829	0.46048	0.51485	0.88349	1.5259	0.44876	1.0399	0.74085	0.55559	1.0401	0.99302	0.5226	1.1589	0.80826	0.5901	0.90775	1.7944	0.66814	1.1136	0.68139	NaN	0.98499	0.90632	0.56187	0.82696	0.82786	0.58166	1.0731	0.70815	0.52069	1.2759	0.70007	0.70732	1.1388	0.7493	0.30182	1.2416	0.72838	0.35818	0.84013	0.74618	0.81672	0.35701	1.6258	0.35275
NaN	NaN	NaN	0.67429	NaN	1.3298	0.4548	NaN	0.88202	1.6994	0.59278	0.75463	NaN	NaN	1.1474	0.99456	0.61985	0.98364	NaN	NaN	0.74366	1.6678	NaN	1.0275	0.63917	0.59951	0.8035	0.88103	0.46693	0.87058	0.74362	NaN	1.0592	NaN	NaN	1.1017	0.67747	NaN	0.9774	0.76008	NaN	0.99009	NaN	NaN	0.7978	NaN	0.73225	NaN	1.8227	NaN
0.8694	0.81771	1.0059	0.6455	0.82344	1.0943	0.3979	0.68139	1.1685	0.7207	0.70652	0.84117	0.5805	0.74925	0.9443	0.75669	0.71507	0.95896	0.71203	0.70483	0.91341	0.61247	0.76147	1.0072	0.77139	0.71402	0.89145	0.71276	0.62436	0.85157	0.83421	0.77516	0.96122	0.70431	0.68655	0.97764	0.71232	0.77534	0.97703	0.79075	0.6628	1.084	0.78006	0.68863	0.91338	1.083	0.67862	0.68965	1.2764	0.69078
0.92647	0.72126	1.0071	0.65293	0.63673	1.1013	0.36058	0.5255	0.92665	0.89785	0.67523	0.85421	0.5974	0.61295	0.90327	0.86107	0.59186	0.97408	0.72588	0.64314	0.87152	0.97224	0.70121	1.0539	0.74586	0.62843	0.7651	0.64221	0.6124	0.73973	0.70438	0.7392	0.89768	0.74818	0.55684	1.012	0.79622	0.59583	0.93073	0.79762	0.55061	0.92822	0.7269	0.6726	0.90385	0.97414	0.72178	0.58928	1.1851	0.62864
0.84976	0.71093	1.0527	0.63251	0.61946	1.165	0.37071	0.50036	1.0273	0.80623	0.69202	0.87944	0.62445	0.54939	0.88766	0.78926	0.55479	0.92877	0.74409	0.65209	0.81223	0.77985	0.66249	1.2591	0.72626	0.57896	0.82572	0.66124	0.54606	0.86117	0.64261	0.63993	0.85948	0.7966	0.615	0.97941	0.68604	0.52262	0.83832	0.73319	0.55031	1.1913	0.72698	0.61986	1.0081	0.90913	0.73008	0.57723	1.1681	0.53365
NaN	NaN	NaN	0.65108	0.7562	NaN	NaN	NaN	NaN	0.95924	NaN	NaN	NaN	0.50199	NaN	NaN	NaN	NaN	NaN	0.74512	NaN	0.93345	0.77066	NaN	0.58726	NaN	NaN	NaN	NaN	NaN	NaN	0.6578	NaN	NaN	NaN	NaN	NaN	NaN	NaN	NaN	NaN	NaN	0.82147	0.51657	NaN	0.8698	NaN	NaN	NaN	NaN
NaN	NaN	NaN	NaN	NaN	NaN	NaN	NaN	NaN	NaN	NaN	NaN	NaN	NaN	NaN	NaN	NaN	NaN	NaN	NaN	NaN	NaN	NaN	NaN	NaN	NaN	NaN	NaN	NaN	NaN	NaN	NaN	NaN	NaN	NaN	NaN	NaN	NaN	NaN	NaN	NaN	NaN	NaN	NaN	NaN	NaN	NaN	NaN	NaN	NaN
NaN	NaN	NaN	NaN	NaN	NaN	NaN	NaN	NaN	NaN	NaN	NaN	NaN	NaN	NaN	NaN	NaN	NaN	NaN	NaN	NaN	NaN	NaN	NaN	NaN	NaN	NaN	NaN	NaN	NaN	NaN	NaN	NaN	NaN	NaN	NaN	NaN	NaN	NaN	NaN	NaN	NaN	NaN	NaN	NaN	NaN	NaN	NaN	NaN	NaN
0.87167	NaN	NaN	NaN	0.80594	NaN	0.39358	0.65981	0.89749	1.1076	0.96022	NaN	0.64509	0.8453	NaN	0.84321	NaN	0.93768	NaN	0.78932	0.78548	NaN	0.69784	0.92129	0.88634	0.78975	0.82893	NaN	0.63822	NaN	0.71502	0.79433	NaN	0.77635	NaN	0.96382	NaN	0.91922	0.92324	NaN	0.47111	0.96666	0.69135	0.65139	NaN	1.0438	0.7681	0.7003	1.3879	0.68705
0.79103	NaN	NaN	NaN	NaN	NaN	NaN	NaN	NaN	NaN	NaN	NaN	NaN	NaN	NaN	NaN	NaN	NaN	NaN	NaN	NaN	NaN	NaN	NaN	NaN	NaN	NaN	NaN	NaN	NaN	NaN	NaN	NaN	NaN	NaN	NaN	NaN	NaN	NaN	NaN	NaN	NaN	NaN	NaN	NaN	NaN	NaN	NaN	NaN	NaN
NaN	NaN	NaN	0.3015	NaN	NaN	0.20991	NaN	NaN	1.2546	NaN	NaN	NaN	NaN	NaN	NaN	NaN	NaN	NaN	NaN	NaN	NaN	NaN	NaN	0.79795	NaN	NaN	NaN	NaN	NaN	NaN	NaN	NaN	1.2874	NaN	NaN	NaN	NaN	NaN	NaN	NaN	NaN	NaN	NaN	NaN	NaN	NaN	NaN	NaN	NaN
NaN	NaN	NaN	NaN	NaN	NaN	NaN	NaN	NaN	0.81191	NaN	NaN	0.73468	NaN	NaN	NaN	NaN	NaN	NaN	NaN	NaN	0.8209	NaN	NaN	NaN	NaN	NaN	NaN	NaN	NaN	NaN	NaN	NaN	NaN	NaN	NaN	NaN	NaN	NaN	0.75395	NaN	NaN	NaN	NaN	NaN	NaN	NaN	NaN	NaN	NaN
NaN	NaN	NaN	0.72978	NaN	NaN	NaN	NaN	NaN	0.67352	NaN	NaN	NaN	NaN	NaN	NaN	NaN	NaN	NaN	NaN	NaN	NaN	NaN	NaN	NaN	NaN	NaN	NaN	NaN	NaN	NaN	NaN	NaN	NaN	NaN	NaN	NaN	NaN	NaN	NaN	NaN	NaN	NaN	NaN	NaN	NaN	NaN	NaN	NaN	NaN
NaN	NaN	NaN	NaN	NaN	NaN	NaN	NaN	NaN	NaN	NaN	NaN	NaN	NaN	NaN	NaN	NaN	NaN	NaN	NaN	NaN	NaN	NaN	NaN	NaN	NaN	NaN	NaN	NaN	NaN	NaN	NaN	NaN	NaN	NaN	NaN	NaN	NaN	NaN	NaN	NaN	NaN	NaN	NaN	NaN	NaN	NaN	NaN	NaN	NaN
NaN	NaN	NaN	NaN	NaN	NaN	NaN	NaN	NaN	NaN	NaN	NaN	NaN	NaN	NaN	NaN	NaN	NaN	NaN	NaN	NaN	NaN	NaN	NaN	NaN	NaN	NaN	NaN	NaN	NaN	NaN	NaN	NaN	NaN	NaN	NaN	NaN	NaN	NaN	NaN	NaN	NaN	NaN	NaN	NaN	NaN	NaN	NaN	NaN	NaN
1.0401	NaN	NaN	NaN	NaN	NaN	0.65215	NaN	NaN	1.0537	NaN	NaN	0.91737	NaN	NaN	NaN	NaN	NaN	NaN	NaN	NaN	NaN	NaN	NaN	1.384	NaN	NaN	NaN	NaN	NaN	0.83403	NaN	NaN	1.2778	NaN	NaN	NaN	NaN	NaN	NaN	NaN	NaN	NaN	NaN	NaN	0.92414	NaN	NaN	NaN	NaN
NaN	NaN	0.84677	NaN	NaN	NaN	NaN	NaN	0.86842	NaN	NaN	NaN	NaN	0.46492	0.73278	NaN	NaN	0.81191	NaN	NaN	NaN	0.59264	NaN	0.98912	0.70474	NaN	NaN	NaN	NaN	0.85138	NaN	NaN	NaN	NaN	0.8609	1.0368	NaN	NaN	NaN	0.62715	0.93655	NaN	0.63912	0.83538	NaN	1.1111	NaN	1.0296	1.2151	0.98988
0.84183	0.81825	0.99984	0.59643	0.70738	0.96532	0.40131	0.74621	0.92227	1.2622	0.62026	0.75226	0.61169	0.61519	0.849	0.7029	0.63498	0.9576	0.62857	0.73822	0.84196	0.80874	0.66122	0.96282	0.79053	0.76512	0.96605	0.76542	0.56317	0.64164	0.75976	0.8783	0.74178	0.77143	0.59015	1.0076	0.58253	0.74275	0.92829	0.68244	0.5297	0.9342	0.67915	0.85496	0.91363	0.91018	NaN	0.76337	1.0991	0.53985
NaN	NaN	NaN	NaN	NaN	NaN	NaN	NaN	NaN	NaN	NaN	NaN	NaN	NaN	NaN	0.82121	NaN	NaN	NaN	NaN	NaN	NaN	NaN	NaN	NaN	NaN	NaN	NaN	NaN	NaN	0.84411	NaN	NaN	0.38248	NaN	NaN	NaN	NaN	NaN	NaN	NaN	NaN	NaN	NaN	NaN	NaN	NaN	NaN	NaN	NaN
NaN	0.80491	0.99803	NaN	NaN	NaN	NaN	NaN	NaN	NaN	NaN	0.88286	0.80941	NaN	0.9756	NaN	0.58897	1.0289	NaN	0.66614	NaN	NaN	0.67817	1.008	NaN	0.68435	0.76061	NaN	NaN	0.9154	NaN	0.69491	0.90117	NaN	NaN	1.0195	NaN	0.64952	0.98538	NaN	NaN	1.0096	NaN	0.58753	0.89232	0.63066	0.62095	NaN	1.4387	NaN
0.78455	0.96496	NaN	0.52663	0.72087	NaN	0.39647	NaN	NaN	0.57149	0.58683	NaN	0.51409	0.69307	1.2895	NaN	0.61342	NaN	0.62596	0.74395	NaN	0.49992	NaN	NaN	0.67162	NaN	NaN	NaN	0.61834	NaN	0.74148	NaN	NaN	NaN	0.43012	NaN	NaN	NaN	NaN	NaN	NaN	NaN	0.66537	NaN	NaN	NaN	0.85129	NaN	NaN	NaN
NaN	NaN	NaN	NaN	NaN	NaN	NaN	NaN	NaN	NaN	NaN	NaN	NaN	NaN	NaN	NaN	NaN	NaN	NaN	0.81469	NaN	NaN	NaN	NaN	NaN	NaN	0.8363	1.0399	NaN	NaN	NaN	NaN	NaN	NaN	NaN	NaN	NaN	NaN	NaN	NaN	NaN	NaN	NaN	NaN	0.95914	NaN	NaN	NaN	NaN	1.6991
NaN	NaN	NaN	NaN	NaN	NaN	NaN	NaN	NaN	NaN	NaN	NaN	NaN	NaN	NaN	NaN	NaN	NaN	NaN	NaN	NaN	NaN	NaN	NaN	NaN	NaN	NaN	NaN	NaN	NaN	NaN	NaN	NaN	NaN	NaN	NaN	NaN	NaN	NaN	NaN	NaN	NaN	NaN	NaN	NaN	NaN	NaN	NaN	NaN	NaN
1.109	0.82674	NaN	NaN	NaN	NaN	NaN	NaN	NaN	NaN	0.8968	NaN	NaN	NaN	NaN	NaN	NaN	NaN	NaN	NaN	NaN	NaN	1.0177	NaN	NaN	NaN	NaN	NaN	NaN	NaN	NaN	1.0995	NaN	NaN	NaN	NaN	NaN	1.147	NaN	NaN	NaN	NaN	NaN	NaN	NaN	1.0374	NaN	NaN	NaN	NaN
NaN	NaN	0.83852	NaN	NaN	NaN	NaN	NaN	NaN	NaN	NaN	0.81047	NaN	NaN	0.89707	NaN	NaN	NaN	NaN	NaN	NaN	NaN	1.1432	NaN	NaN	0.76544	NaN	NaN	NaN	0.76762	NaN	NaN	NaN	NaN	NaN	NaN	NaN	1.1161	NaN	NaN	NaN	1.1692	NaN	1.1074	1.062	1.453	NaN	NaN	NaN	NaN
0.52836	0.80781	NaN	NaN	NaN	NaN	0.30668	0.75181	NaN	NaN	0.85264	NaN	0.40549	0.67494	NaN	NaN	0.71021	NaN	0.58191	0.85262	NaN	0.40759	0.78041	NaN	NaN	0.76443	NaN	0.50439	0.75983	NaN	NaN	NaN	NaN	NaN	0.71062	NaN	0.62797	0.70617	NaN	0.69035	0.74544	NaN	0.73129	NaN	NaN	NaN	NaN	0.61265	NaN	NaN
NaN	1.0045	NaN	NaN	NaN	NaN	NaN	NaN	NaN	NaN	NaN	NaN	NaN	NaN	NaN	NaN	NaN	NaN	NaN	NaN	NaN	NaN	NaN	NaN	NaN	1.0655	NaN	NaN	NaN	NaN	NaN	NaN	NaN	NaN	NaN	NaN	NaN	NaN	NaN	NaN	NaN	NaN	NaN	NaN	NaN	NaN	NaN	0.73908	NaN	NaN
NaN	NaN	NaN	NaN	NaN	NaN	NaN	NaN	NaN	NaN	NaN	NaN	NaN	NaN	NaN	NaN	NaN	NaN	NaN	NaN	NaN	NaN	NaN	NaN	NaN	NaN	NaN	NaN	NaN	NaN	NaN	NaN	NaN	NaN	NaN	NaN	NaN	NaN	NaN	NaN	NaN	NaN	NaN	NaN	NaN	NaN	NaN	NaN	NaN	NaN
NaN	NaN	NaN	NaN	NaN	NaN	NaN	NaN	NaN	NaN	NaN	NaN	0.73618	NaN	NaN	NaN	NaN	NaN	0.7359	NaN	NaN	NaN	NaN	NaN	0.52085	NaN	NaN	NaN	NaN	NaN	NaN	NaN	NaN	NaN	NaN	NaN	0.59353	NaN	NaN	NaN	NaN	NaN	NaN	NaN	NaN	NaN	NaN	NaN	NaN	NaN
0.81656	0.75264	0.98738	0.608	0.70018	1.0556	0.33843	0.65354	0.91596	0.70219	0.57235	0.76289	0.52416	0.67086	0.95621	0.69414	0.79092	1.0103	0.5981	0.67414	0.91801	0.71923	0.60637	1.0629	0.62526	0.61654	0.81218	0.66047	0.58281	0.90248	0.71232	0.70499	0.9651	0.75357	0.56883	1.1302	0.62765	0.65775	1.0116	0.81151	0.57418	1.0617	0.7169	0.63657	0.97416	1.0496	0.76755	0.67458	1.2737	0.78109
NaN	NaN	NaN	NaN	NaN	NaN	NaN	NaN	NaN	NaN	NaN	NaN	NaN	NaN	NaN	NaN	NaN	NaN	NaN	NaN	NaN	NaN	NaN	NaN	NaN	NaN	0.98064	NaN	NaN	NaN	NaN	NaN	NaN	NaN	NaN	NaN	NaN	NaN	NaN	NaN	NaN	NaN	NaN	NaN	NaN	NaN	NaN	NaN	NaN	NaN
NaN	NaN	NaN	NaN	NaN	NaN	NaN	NaN	NaN	NaN	NaN	NaN	NaN	NaN	NaN	NaN	NaN	NaN	NaN	NaN	NaN	NaN	NaN	NaN	NaN	NaN	NaN	NaN	NaN	NaN	NaN	NaN	NaN	NaN	NaN	NaN	NaN	NaN	NaN	NaN	NaN	NaN	NaN	NaN	NaN	NaN	NaN	NaN	NaN	NaN
NaN	NaN	NaN	NaN	NaN	NaN	NaN	NaN	NaN	NaN	NaN	NaN	NaN	NaN	NaN	NaN	NaN	NaN	NaN	NaN	NaN	NaN	NaN	NaN	NaN	NaN	NaN	NaN	NaN	NaN	NaN	NaN	NaN	NaN	NaN	NaN	NaN	NaN	NaN	NaN	NaN	NaN	NaN	NaN	NaN	NaN	NaN	NaN	NaN	NaN
0.92372	0.72381	NaN	0.73889	0.71471	1.0732	0.35088	0.66121	NaN	0.62284	0.69095	1.7755	0.66608	0.69962	NaN	0.80804	0.57249	NaN	0.69782	0.64944	0.77507	0.67127	0.69869	1.181	0.85592	0.80203	NaN	0.75411	0.62603	0.89143	0.94653	0.797	NaN	0.88035	0.68825	NaN	0.74067	0.61511	1.0855	1.015	0.66818	NaN	1.0076	0.65978	NaN	1.0141	NaN	0.75628	NaN	0.74346
0.94554	NaN	NaN	0.93653	0.62944	NaN	0.26186	NaN	NaN	1.1974	NaN	NaN	0.71182	NaN	NaN	NaN	NaN	NaN	0.85762	NaN	NaN	1.8152	NaN	NaN	0.74017	NaN	NaN	1.1729	NaN	NaN	1.2964	0.79053	1.4473	0.85582	NaN	NaN	NaN	NaN	NaN	0.77605	NaN	NaN	0.48702	NaN	NaN	NaN	NaN	NaN	NaN	NaN
0.35062	0.60495	NaN	0.25995	0.70206	NaN	NaN	0.60369	NaN	0.36992	0.51228	NaN	0.32295	0.61544	NaN	0.86373	0.65765	NaN	0.67371	NaN	NaN	NaN	0.63729	NaN	0.41903	0.70213	NaN	0.62148	0.56985	NaN	0.86972	0.67548	NaN	0.82735	0.62618	NaN	0.76658	NaN	NaN	0.72042	0.69076	NaN	0.65625	0.85798	NaN	1.2234	NaN	NaN	NaN	0.87673
1.0517	0.55995	NaN	0.61515	0.55869	NaN	0.33238	0.3855	NaN	0.72001	0.41245	NaN	0.8675	0.45246	NaN	0.87372	0.39451	NaN	0.44155	0.38351	NaN	0.5096	0.48854	NaN	0.87411	0.47222	NaN	0.61199	0.44774	NaN	NaN	0.48693	NaN	1.0176	NaN	NaN	0.75607	0.46412	NaN	0.44463	NaN	NaN	0.77681	0.28345	NaN	NaN	NaN	NaN	NaN	0.33255
0.84001	0.77194	NaN	0.51698	0.60916	NaN	0.30644	NaN	1.0164	0.72534	0.62329	NaN	0.50348	0.62777	NaN	0.84424	NaN	0.80024	0.6838	NaN	NaN	0.59074	0.52531	0.94043	0.69146	0.73842	0.74033	0.62991	0.73697	NaN	0.72813	0.64489	NaN	0.73105	NaN	0.74253	0.64045	NaN	NaN	0.77855	0.60254	0.88078	0.79266	NaN	NaN	NaN	0.74781	NaN	NaN	0.65882
NaN	NaN	NaN	NaN	NaN	NaN	NaN	NaN	NaN	NaN	NaN	NaN	NaN	NaN	NaN	NaN	NaN	NaN	NaN	NaN	NaN	NaN	NaN	NaN	NaN	NaN	NaN	NaN	NaN	NaN	NaN	NaN	NaN	NaN	NaN	NaN	NaN	NaN	NaN	NaN	NaN	NaN	NaN	NaN	NaN	NaN	NaN	NaN	NaN	NaN
NaN	NaN	1.3904	NaN	0.86982	NaN	NaN	0.70722	NaN	NaN	NaN	NaN	NaN	0.66254	NaN	NaN	NaN	NaN	NaN	NaN	NaN	NaN	NaN	1.1505	NaN	NaN	0.85029	NaN	NaN	1.0329	0.86237	NaN	1.49	NaN	NaN	0.70914	NaN	0.83961	0.9953	NaN	NaN	1.2236	0.94356	NaN	NaN	NaN	1.0395	NaN	NaN	NaN
0.94768	1.098	0.97612	1.7607	0.78559	NaN	0.83254	0.84292	NaN	1.3272	0.53822	0.59326	1.1126	0.55504	1.092	1.0077	0.57207	NaN	1.0157	0.62239	NaN	0.52097	0.74247	NaN	0.57539	0.88163	NaN	0.82327	0.82861	0.85726	1.2853	0.70415	NaN	NaN	0.87904	NaN	1.04	1.0201	NaN	1.2372	0.94499	NaN	0.55185	0.48506	NaN	1.3127	NaN	1.9827	NaN	0.78802
0.85972	NaN	NaN	0.70114	NaN	NaN	NaN	NaN	0.89993	NaN	NaN	NaN	0.5665	NaN	0.87515	NaN	NaN	NaN	0.55249	NaN	NaN	NaN	NaN	1.1349	NaN	NaN	0.8582	0.70586	NaN	0.79244	0.77704	NaN	NaN	0.9833	NaN	NaN	0.58366	NaN	1.0546	0.87064	0.66098	1.0039	NaN	NaN	NaN	1.2837	NaN	NaN	NaN	NaN
NaN	NaN	NaN	NaN	NaN	NaN	NaN	NaN	NaN	NaN	NaN	NaN	NaN	NaN	NaN	NaN	NaN	NaN	NaN	NaN	NaN	NaN	NaN	NaN	NaN	NaN	NaN	NaN	NaN	NaN	NaN	NaN	NaN	NaN	NaN	NaN	NaN	NaN	NaN	NaN	NaN	NaN	NaN	NaN	NaN	NaN	NaN	NaN	NaN	NaN
NaN	NaN	NaN	NaN	NaN	NaN	NaN	NaN	NaN	NaN	NaN	NaN	NaN	NaN	NaN	NaN	NaN	NaN	NaN	NaN	NaN	NaN	NaN	NaN	NaN	NaN	NaN	0.86125	NaN	NaN	0.77078	NaN	NaN	NaN	NaN	NaN	NaN	NaN	NaN	NaN	NaN	NaN	NaN	NaN	NaN	NaN	NaN	NaN	NaN	NaN
0.81891	0.76451	0.99012	0.7405	0.72596	1.0968	0.39867	0.58993	0.84626	0.8524	0.61729	1.006	0.66976	0.71953	0.94263	0.76994	0.48945	0.89356	0.66584	0.63405	0.83156	0.72323	0.73054	0.87333	0.67655	0.75207	0.89071	0.75809	0.62776	0.89764	0.79965	0.88224	1.2496	0.72939	0.65042	0.98592	0.67644	0.78219	0.84273	0.87265	0.75557	0.92369	0.65188	0.72459	0.88707	1.0875	0.93107	0.69682	1.4895	0.6854
NaN	NaN	NaN	NaN	NaN	NaN	NaN	NaN	NaN	NaN	NaN	NaN	NaN	NaN	NaN	NaN	NaN	NaN	NaN	NaN	NaN	NaN	NaN	NaN	NaN	NaN	NaN	NaN	NaN	NaN	NaN	NaN	NaN	NaN	NaN	NaN	NaN	NaN	NaN	NaN	NaN	NaN	NaN	NaN	NaN	NaN	NaN	NaN	NaN	NaN
NaN	NaN	NaN	NaN	NaN	NaN	NaN	NaN	NaN	NaN	NaN	NaN	NaN	NaN	NaN	NaN	NaN	NaN	NaN	NaN	NaN	NaN	NaN	NaN	NaN	NaN	NaN	NaN	NaN	NaN	NaN	NaN	NaN	NaN	NaN	NaN	NaN	NaN	NaN	NaN	NaN	NaN	NaN	NaN	NaN	NaN	NaN	NaN	NaN	NaN
NaN	NaN	NaN	NaN	NaN	NaN	NaN	NaN	NaN	NaN	NaN	NaN	NaN	NaN	0.85596	NaN	NaN	0.84052	NaN	NaN	NaN	NaN	NaN	0.94162	NaN	NaN	1.0701	NaN	NaN	NaN	NaN	NaN	NaN	NaN	NaN	1.1644	NaN	NaN	0.91265	NaN	NaN	0.87849	NaN	NaN	0.75872	NaN	NaN	NaN	1.1472	NaN
0.89288	0.82336	NaN	0.65319	0.85582	1.2911	0.34136	0.69976	0.76255	0.65368	0.70382	1.3176	0.79698	0.69149	1.0466	0.84686	0.61677	1.2437	0.73246	0.58388	0.77894	0.65363	0.6464	1.262	0.66629	0.7022	NaN	0.68292	0.61314	0.88116	0.74967	0.67304	0.94534	0.90874	0.78335	1.5789	0.59367	0.72478	NaN	0.93383	0.69505	NaN	0.9542	0.74968	0.99399	1.1755	0.84952	0.72229	1.4436	0.75852
NaN	NaN	NaN	NaN	NaN	NaN	NaN	NaN	NaN	NaN	NaN	NaN	NaN	NaN	NaN	NaN	NaN	NaN	NaN	NaN	NaN	NaN	NaN	NaN	NaN	NaN	NaN	NaN	NaN	NaN	NaN	NaN	NaN	NaN	NaN	NaN	NaN	NaN	NaN	NaN	NaN	NaN	NaN	NaN	NaN	NaN	NaN	NaN	NaN	NaN
0.82273	NaN	NaN	0.60125	0.76647	1.0567	0.42101	0.78303	0.92653	0.70057	NaN	NaN	0.56578	0.71522	0.97319	0.77981	NaN	0.74085	0.75508	NaN	0.62864	0.52496	NaN	0.76386	0.75742	0.5356	0.48922	0.82073	NaN	0.73138	0.72055	NaN	0.55935	0.69063	NaN	0.93055	0.618	NaN	0.86195	0.87367	NaN	0.77971	0.59822	NaN	0.81932	NaN	0.63888	0.41447	0.97424	NaN
NaN	NaN	NaN	0.56154	NaN	NaN	0.45176	NaN	NaN	NaN	NaN	NaN	0.58295	NaN	NaN	NaN	NaN	NaN	NaN	NaN	NaN	NaN	NaN	NaN	0.92006	NaN	NaN	NaN	NaN	NaN	NaN	NaN	NaN	NaN	NaN	NaN	NaN	NaN	NaN	NaN	NaN	NaN	NaN	NaN	NaN	NaN	NaN	NaN	NaN	NaN
0.91711	NaN	0.94669	0.81805	NaN	1.0055	0.24358	NaN	NaN	1.5885	NaN	NaN	NaN	NaN	0.99709	0.84674	NaN	NaN	0.50081	NaN	0.73834	2.4717	NaN	NaN	NaN	NaN	NaN	0.62684	NaN	0.63499	0.56381	NaN	0.92808	0.85288	NaN	0.74867	0.91699	NaN	NaN	0.56378	NaN	0.90461	0.60815	NaN	0.71571	NaN	0.52887	NaN	1.4207	NaN
0.87316	0.75352	1.0632	NaN	0.85234	NaN	0.37093	0.68568	NaN	0.76416	0.63606	NaN	0.5124	0.68335	NaN	0.84572	0.62548	1.2178	0.74677	0.69386	NaN	NaN	0.64029	NaN	0.70038	0.63974	NaN	0.52571	0.76308	0.96159	0.75516	0.75986	NaN	NaN	0.69924	NaN	0.64157	0.80125	NaN	0.73595	0.58106	NaN	NaN	0.63726	NaN	1.0412	NaN	0.67014	NaN	0.69784
NaN	NaN	NaN	NaN	NaN	NaN	NaN	NaN	NaN	NaN	NaN	NaN	NaN	NaN	NaN	NaN	NaN	NaN	NaN	NaN	NaN	NaN	NaN	NaN	NaN	NaN	NaN	NaN	NaN	NaN	NaN	NaN	NaN	NaN	NaN	NaN	NaN	NaN	NaN	NaN	NaN	NaN	NaN	NaN	NaN	NaN	NaN	NaN	NaN	NaN
NaN	NaN	NaN	NaN	NaN	NaN	NaN	NaN	NaN	NaN	NaN	NaN	NaN	NaN	NaN	NaN	NaN	NaN	NaN	NaN	NaN	NaN	NaN	NaN	NaN	NaN	NaN	NaN	NaN	NaN	NaN	NaN	NaN	NaN	NaN	NaN	NaN	NaN	NaN	NaN	NaN	NaN	NaN	NaN	NaN	NaN	NaN	NaN	NaN	NaN
1.1827	0.84498	NaN	0.99823	0.63548	NaN	0.38394	NaN	NaN	NaN	0.71862	NaN	0.77751	0.63972	NaN	NaN	0.65634	NaN	0.8258	0.61236	NaN	NaN	0.7175	NaN	NaN	0.74614	NaN	0.75396	0.54325	NaN	NaN	0.71126	NaN	NaN	0.63621	NaN	0.69047	0.74382	NaN	0.63185	NaN	NaN	NaN	0.80809	NaN	NaN	NaN	0.72628	NaN	NaN
NaN	NaN	NaN	NaN	NaN	NaN	NaN	NaN	NaN	NaN	NaN	NaN	NaN	NaN	NaN	NaN	NaN	NaN	NaN	NaN	NaN	NaN	NaN	NaN	NaN	0.64249	NaN	NaN	NaN	NaN	NaN	0.9214	NaN	NaN	NaN	NaN	NaN	NaN	NaN	NaN	NaN	NaN	NaN	NaN	NaN	1.1701	NaN	NaN	NaN	NaN
0.83716	0.59624	1.074	0.61912	0.93017	1.3955	0.39082	0.65711	0.80671	0.59754	0.64712	0.85938	0.65449	0.58889	0.92225	0.74615	0.66307	1.0558	0.68375	0.53147	0.78114	0.61387	0.70648	1.1872	0.71889	0.61818	1.0881	0.73615	0.63193	1.0755	0.68195	0.72868	0.971	0.7349	0.54693	1.241	0.61026	0.74128	1.0811	0.83582	0.69786	0.99168	0.69815	0.7278	0.95739	1.1387	0.64249	0.77013	1.613	0.56922
NaN	NaN	NaN	NaN	NaN	NaN	NaN	NaN	NaN	1.1091	NaN	NaN	NaN	NaN	NaN	NaN	NaN	NaN	NaN	NaN	NaN	NaN	NaN	NaN	NaN	NaN	NaN	NaN	1.1661	NaN	NaN	NaN	NaN	0.53486	NaN	NaN	NaN	NaN	NaN	NaN	NaN	NaN	NaN	NaN	NaN	NaN	NaN	NaN	NaN	NaN
NaN	NaN	NaN	NaN	NaN	NaN	NaN	NaN	NaN	NaN	NaN	NaN	NaN	NaN	NaN	NaN	NaN	NaN	NaN	NaN	NaN	NaN	NaN	NaN	NaN	NaN	NaN	NaN	NaN	NaN	NaN	NaN	NaN	NaN	NaN	NaN	NaN	NaN	NaN	NaN	NaN	NaN	NaN	NaN	NaN	NaN	0.38062	NaN	NaN	NaN
0.71558	NaN	NaN	NaN	NaN	NaN	NaN	NaN	NaN	NaN	NaN	NaN	NaN	NaN	NaN	NaN	NaN	NaN	NaN	NaN	NaN	NaN	NaN	NaN	NaN	NaN	NaN	NaN	NaN	NaN	NaN	NaN	NaN	NaN	NaN	NaN	NaN	NaN	NaN	NaN	NaN	NaN	0.62982	NaN	NaN	NaN	NaN	NaN	NaN	NaN
NaN	NaN	NaN	NaN	NaN	NaN	NaN	NaN	NaN	NaN	NaN	NaN	NaN	NaN	NaN	NaN	NaN	NaN	NaN	NaN	NaN	NaN	NaN	NaN	NaN	NaN	NaN	NaN	NaN	NaN	NaN	NaN	NaN	NaN	NaN	NaN	NaN	NaN	NaN	NaN	NaN	NaN	NaN	NaN	NaN	NaN	NaN	NaN	NaN	NaN
NaN	NaN	NaN	NaN	NaN	NaN	NaN	NaN	NaN	NaN	NaN	NaN	NaN	NaN	NaN	NaN	NaN	NaN	NaN	NaN	NaN	NaN	NaN	NaN	NaN	NaN	NaN	NaN	NaN	NaN	NaN	NaN	NaN	NaN	NaN	NaN	NaN	NaN	NaN	NaN	NaN	NaN	NaN	NaN	NaN	NaN	NaN	NaN	NaN	NaN
0.95451	0.7698	0.87001	0.62695	0.67948	1.1576	0.31856	0.69471	0.85538	0.67546	0.63191	0.91693	0.61198	0.7006	1.0508	0.82709	0.68146	1.1088	0.63863	0.58206	1.03	0.60567	0.7158	1.1681	0.71356	0.73387	1.0343	0.69152	0.58819	1.009	0.75494	0.75416	1.1055	0.77772	0.61455	1.2383	0.6466	0.85661	1.1486	0.78267	0.5651	1.3167	0.69498	0.69816	0.98647	1.0449	0.8893	0.66309	1.5816	0.65085
0.84029	0.66429	0.92534	0.54938	0.65682	0.88548	0.35248	0.52858	0.77227	0.60263	0.43609	0.8446	0.56057	0.65475	0.82786	0.79039	0.74015	0.92636	0.69125	0.58051	0.82046	0.42551	0.70459	0.94315	0.72548	0.73647	0.9513	0.7132	0.63811	0.80121	0.76776	0.67893	0.95429	0.58488	0.58223	1.0439	0.59344	0.66803	1.0377	0.78301	0.5574	1.0423	0.70762	0.61804	0.92728	0.9701	0.7763	0.68255	1.2991	0.67553
NaN	NaN	NaN	NaN	NaN	NaN	NaN	NaN	NaN	NaN	NaN	NaN	NaN	NaN	NaN	NaN	NaN	NaN	NaN	NaN	NaN	0.89796	NaN	NaN	NaN	NaN	NaN	NaN	NaN	NaN	NaN	NaN	NaN	0.24068	NaN	NaN	NaN	NaN	NaN	NaN	NaN	NaN	NaN	NaN	NaN	NaN	NaN	NaN	NaN	NaN
NaN	NaN	NaN	NaN	NaN	NaN	NaN	NaN	NaN	NaN	NaN	NaN	NaN	NaN	NaN	NaN	NaN	NaN	NaN	NaN	NaN	NaN	NaN	NaN	NaN	NaN	NaN	NaN	NaN	NaN	NaN	NaN	NaN	NaN	NaN	NaN	NaN	NaN	NaN	NaN	NaN	NaN	NaN	NaN	NaN	NaN	NaN	NaN	NaN	NaN
NaN	NaN	NaN	NaN	NaN	NaN	NaN	NaN	NaN	NaN	NaN	NaN	NaN	NaN	NaN	NaN	NaN	NaN	NaN	NaN	NaN	NaN	NaN	NaN	NaN	NaN	NaN	NaN	NaN	NaN	NaN	NaN	NaN	NaN	NaN	NaN	NaN	NaN	NaN	NaN	NaN	NaN	NaN	NaN	NaN	NaN	NaN	NaN	NaN	NaN
[truncated: 3,512 more rows]
[truncated: 19 more columns]

## Sheet: Filtered IDs and replace values
Ratio H/L 00_01	Ratio H/L 00_02	Ratio H/L 00_03	Ratio H/L 01_01	Ratio H/L 01_02	Ratio H/L 01_03	Ratio H/L 02_01	Ratio H/L 02_02	Ratio H/L 02_03	Ratio H/L 03_01	Ratio H/L 03_02	Ratio H/L 03_03	Ratio H/L 04_01	Ratio H/L 04_02	Ratio H/L 04_03	Ratio H/L 05_01	Ratio H/L 05_02	Ratio H/L 05_03	Ratio H/L 06_01	Ratio H/L 06_02	Ratio H/L 06_03	Ratio H/L 07_01	Ratio H/L 07_02	Ratio H/L 07_03	Ratio H/L 08_01	Ratio H/L 08_02	Ratio H/L 08_03	Ratio H/L 09_01	Ratio H/L 09_02	Ratio H/L 09_03	Ratio H/L 10_01	Ratio H/L 10_02	Ratio H/L 10_03	Ratio H/L 15_01	Ratio H/L 15_02	Ratio H/L 15_03	Ratio H/L 20_01	Ratio H/L 20_02	Ratio H/L 20_03	Ratio H/L 25_01	Ratio H/L 25_02	Ratio H/L 25_03	Ratio H/L 30_01	Ratio H/L 30_02	Ratio H/L 30_03	Ratio H/L 40_02	Ratio H/L 40_03	Ratio H/L 50_02	Ratio H/L 50_03	Ratio H/L 60_02
[truncated: 4,715 more rows]
[truncated: 19 more columns]

[truncated: 1 more sheets: Clustering Output]
