# Supplementary material for: Ordered dephosphorylation initiated by the selective proteolysis of cyclin B drives mitotic exit
Source: bioRxiv preprint, doi:10.1101/2020.06.12.148742, version 1 (2020-06-13)
Supplement: Figure 3_Source Data1_Fractionated proteome data [file 148742_file06.xlsx]

## Sheet: Fractionated Proteome MS data
Ratio H/L 1_00	Ratio H/L 1_10	Ratio H/L 1_20	Ratio H/L 1_30	Ratio H/L 1_40	Ratio H/L 1_50	Ratio H/L 1_60	Ratio H/L 2_00	Ratio H/L 2_10	Ratio H/L 2_20	Ratio H/L 2_30	Ratio H/L 2_40	Ratio H/L 2_50	Ratio H/L 2_60	Only identified by site	Reverse	Potential contaminant	Peptides	Razor + unique peptides	Unique peptides	Sequence coverage [%]	Unique + razor sequence coverage [%]	Unique sequence coverage [%]	Mol. weight [kDa]	Q-value	Intensity	Intensity L	Intensity H	Peptides 1_00	Peptides 1_10	Peptides 1_20	Peptides 1_30	Peptides 1_40	Peptides 1_50	Peptides 1_60	Peptides 2_00	Peptides 2_10	Peptides 2_20	Peptides 2_30	Peptides 2_40	Peptides 2_50	Peptides 2_60	Protein IDs	Majority protein IDs	Protein names	Gene names
#!{Type}E	E	E	E	E	E	E	E	E	E	E	E	E	E	C	C	C	N	N	N	N	N	N	N	N	N	N	N	N	N	N	N	N	N	N	N	N	N	N	N	N	N	T	T	T	T
NaN	NaN	NaN	NaN	NaN	NaN	NaN	NaN	NaN	NaN	NaN	NaN	NaN	NaN				1	1	1	18.5	18.5	18.5	6.3133	0	990130000	610600000	379530000	1	1	1	1	1	1	1	0	0	0	0	0	0	0	A0A0B4J2F0	A0A0B4J2F0
NaN	NaN	NaN	NaN	NaN	NaN	NaN	NaN	NaN	0.78209	0.70009	NaN	0.65944	0.9165				4	4	3	8.4	8.4	6.6	64.098	0	1786100000	1062900000	723220000	1	0	1	2	0	0	1	1	3	3	2	3	2	3	A0AV96;A0AV96-2;Q9NQ94;Q9NQ94-5;Q9NQ94-6;Q9NQ94-3;Q9NQ94-2;Q9NQ94-4	A0AV96;A0AV96-2	RNA-binding protein 47	RBM47
0.97029	0.8409	0.95836	0.93473	0.65547	1.2934	0.55575	0.98055	0.71946	0.79146	0.89067	0.84649	0.67996	0.70746				31	31	31	40.2	40.2	40.2	117.97	0	42985000000	22907000000	20078000000	17	17	18	13	15	10	15	12	12	16	13	15	14	16	A0AVT1;A0AVT1-2;A0AVT1-3;A0AVT1-4	A0AVT1;A0AVT1-2	Ubiquitin-like modifier-activating enzyme 6	UBA6
0.9832	0.97211	1.0178	0.82018	0.80603	1.491	0.6764	1.0932	0.72479	0.92981	0.91519	0.96646	0.84569	0.83625				26	26	26	32.3	32.3	32.3	104.71	0	71566000000	37115000000	34451000000	15	19	14	18	17	13	18	23	19	18	20	19	17	20	A0FGR8-6;A0FGR8;A0FGR8-2;A0FGR8-4;A0FGR8-5	A0FGR8-6;A0FGR8;A0FGR8-2	Extended synaptotagmin-2	ESYT2
NaN	NaN	NaN	NaN	NaN	NaN	NaN	NaN	NaN	NaN	NaN	NaN	NaN	NaN				1	1	1	10.7	10.7	10.7	26.273	0	39416000	39416000	0	0	0	0	0	1	0	0	0	0	0	0	0	0	0	A0JLT2;A0JLT2-2	A0JLT2;A0JLT2-2	Mediator of RNA polymerase II transcription subunit 19	MED19
0.99637	0.86024	0.8416	0.86964	0.73129	1.1791	0.52788	1.0043	0.67347	0.78624	0.8138	0.83836	0.70976	0.73633				22	22	22	42.8	42.8	42.8	71.639	0	64850000000	37030000000	27820000000	13	14	12	17	16	14	17	12	12	15	15	14	13	14	A0MZ66;A0MZ66-3;A0MZ66-5;A0MZ66-6;A0MZ66-4;A0MZ66-8;A0MZ66-2;A0MZ66-7	A0MZ66;A0MZ66-3;A0MZ66-5;A0MZ66-6;A0MZ66-4;A0MZ66-8;A0MZ66-2	Shootin-1	KIAA1598
1.0105	1.0079	1.0548	0.7412	0.74805	1.4139	0.74604	1.0098	0.61961	0.7535	0.85322	0.675	0.84323	0.73518				13	13	13	30.5	30.5	30.5	67.867	0	42114000000	24012000000	18102000000	10	8	8	7	7	6	9	8	6	6	7	6	6	6	A1L0T0	A1L0T0	Acetolactate synthase-like protein	ILVBL
0.98419	0.858	0.91351	0.83019	0.697	1.2535	0.69976	1.0126	0.68422	0.66235	0.80355	0.83412	0.76023	0.57815				17	17	16	26.6	26.6	25.7	101.58	0	23222000000	12973000000	10249000000	13	14	12	13	12	11	12	7	7	9	7	9	7	7	A1X283	A1X283	SH3 and PX domain-containing protein 2B	SH3PXD2B
NaN	NaN	NaN	NaN	NaN	NaN	NaN	NaN	NaN	NaN	NaN	NaN	NaN	NaN				3	1	0	5	1.7	0	95.047	0.0019051	51351000	20235000	31116000	1	2	2	1	2	1	2	1	1	1	1	1	1	1	A2A3N6	A2A3N6	Putative PIP5K1A and PSMD4-like protein	PIPSL
NaN	NaN	NaN	NaN	0.67618	NaN	NaN	NaN	NaN	0.64109	1.0064	0.755	0.71236	0.69182				9	9	1	5.6	5.6	0.5	268.57	0	8640800000	4169800000	4471000000	0	2	2	1	3	2	1	4	2	3	3	3	3	3	A2RRP1	A2RRP1	Neuroblastoma-amplified sequence	NBAS
NaN	NaN	NaN	NaN	NaN	NaN	NaN	NaN	NaN	NaN	NaN	NaN	NaN	NaN				4	4	4	13	13	13	36.547	0.0035661	3111600000	1504300000	1607300000	1	2	2	1	0	1	1	0	1	2	1	1	1	1	A2RUC4;A2RUC4-2	A2RUC4;A2RUC4-2	tRNA wybutosine-synthesizing protein 5	TYW5
0.93908	0.78966	0.79267	0.81465	0.59195	1.0359	0.47998	0.99594	0.56699	0.8823	0.82412	0.81803	0.71953	0.70175				36	36	36	23.1	23.1	23.1	214.82	0	19298000000	10961000000	8336700000	14	18	14	23	17	11	10	19	14	11	13	15	11	14	A3KMH1;A3KMH1-3;A3KMH1-2	A3KMH1;A3KMH1-3;A3KMH1-2	von Willebrand factor A domain-containing protein 8	VWA8
1.2852	0.85077	1.1529	0.79359	0.89164	NaN	0.38355	0.94344	0.74277	0.83115	0.77983	0.92703	0.82112	0.86871				17	17	15	16.9	16.9	15	154.31	0	8102100000	4365200000	3736900000	3	5	4	2	3	0	3	6	8	6	6	5	5	7	A3KN83;A3KN83-2;A3KN83-3;A3KN83-4	A3KN83;A3KN83-2;A3KN83-3;A3KN83-4	Protein strawberry notch homolog 1	SBNO1
0.97704	0.80239	0.88517	0.84181	0.68168	0.94863	0.40743	0.86515	0.54546	0.74801	0.67974	0.73948	0.66372	0.64935				13	13	13	39.3	39.3	39.3	42.932	0	15308000000	8504400000	6804100000	12	8	10	8	8	8	8	7	7	6	7	4	5	6	A4D1E9;A4D1E9-2;A4D1E9-3	A4D1E9;A4D1E9-2	GTP-binding protein 10	GTPBP10
NaN	NaN	NaN	NaN	NaN	NaN	NaN	NaN	NaN	NaN	NaN	0.85615	NaN	NaN				4	4	4	14.8	14.8	14.8	42.111	0.00059253	590700000	345470000	245230000	0	0	0	0	1	0	0	1	1	1	1	2	1	1	A4D1P6-3;A4D1P6-2;A4D1P6	A4D1P6-3;A4D1P6-2;A4D1P6	WD repeat-containing protein 91	WDR91
NaN	NaN	NaN	NaN	NaN	NaN	NaN	NaN	NaN	NaN	NaN	NaN	NaN	NaN				1	1	1	3.4	3.4	3.4	38.658	0.0013506	237490000	111630000	125870000	0	1	1	1	1	0	0	0	0	0	0	0	0	0	A5D8V6	A5D8V6	Vacuolar protein sorting-associated protein 37C	VPS37C
NaN	NaN	NaN	NaN	NaN	NaN	NaN	NaN	NaN	NaN	NaN	NaN	NaN	NaN				2	2	2	8.5	8.5	8.5	31.135	0.0078582	272570000	185040000	87529000	0	0	0	0	0	0	2	1	0	0	1	1	1	1	A5PLL7;A5PLL7-2	A5PLL7;A5PLL7-2	Transmembrane protein 189	TMEM189
NaN	NaN	NaN	NaN	NaN	NaN	NaN	NaN	NaN	NaN	NaN	NaN	0.6026	NaN				2	2	2	7	7	7	46.523	0	858210000	471970000	386240000	0	1	1	1	0	0	1	1	1	1	0	1	2	1	A5PLN9;A5PLN9-2;A5PLN9-4;A5PLN9-5;A5PLN9-7	A5PLN9;A5PLN9-2;A5PLN9-4;A5PLN9-5;A5PLN9-7	Trafficking protein particle complex subunit 13	TRAPPC13
1.0594	0.91878	0.84408	0.92575	0.7062	1.3539	0.58952	0.98842	0.68124	0.76515	0.76986	0.73557	0.71613	0.73191				46	46	1	24.5	24.5	0.6	266.94	0	62691000000	33545000000	29146000000	19	25	25	23	24	23	28	22	22	17	19	25	20	24	A5YKK6;A5YKK6-4	A5YKK6;A5YKK6-4	CCR4-NOT transcription complex subunit 1	CNOT1
NaN	NaN	NaN	NaN	NaN	NaN	NaN	NaN	NaN	NaN	NaN	NaN	NaN	NaN				46	1	1	25.2	1.2	1.2	266.38	0	35721000	35721000	0	18	24	24	22	23	22	27	21	21	16	19	24	20	24	A5YKK6-2;A5YKK6-3	A5YKK6-2;A5YKK6-3	CCR4-NOT transcription complex subunit 1	CNOT1
0.90155	0.90171	0.94621	0.83746	NaN	NaN	NaN	NaN	NaN	NaN	NaN	NaN	NaN	NaN				2	2	2	16.8	16.8	16.8	14.688	0	2873200000	1637700000	1235500000	1	1	1	2	1	1	1	1	1	1	1	1	1	1	Q9GZQ8;A6NCE7;Q9H492;Q9H492-2	Q9GZQ8;A6NCE7;Q9H492;Q9H492-2	Microtubule-associated proteins 1A/1B light chain 3B;Microtubule-associated proteins 1A/1B light chain 3 beta 2;Microtubule-associated proteins 1A/1B light chain 3A	MAP1LC3B;MAP1LC3B2;MAP1LC3A
1.1644	1.1305	1.0712	1.0025	0.80665	1.4	0.66694	1.0247	0.76216	0.92312	0.89922	0.96721	0.81925	0.80575				12	12	12	46.1	46.1	46.1	34.006	0	84789000000	45510000000	39278000000	8	8	7	9	8	6	6	9	8	8	8	8	7	9	A6NDG6	A6NDG6	Phosphoglycolate phosphatase	PGP
NaN	1.151	NaN	0.95143	NaN	NaN	0.94002	1.0886	0.81746	NaN	0.82694	NaN	NaN	0.85576				9	9	9	48.3	48.3	48.3	33.62	0	4494700000	2021100000	2473600000	3	4	2	4	3	4	4	2	4	2	3	3	2	3	A6NDU8	A6NDU8	UPF0600 protein C5orf51	C5orf51
NaN	NaN	NaN	NaN	NaN	NaN	NaN	NaN	NaN	NaN	NaN	NaN	NaN	NaN				2	2	2	10.4	10.4	10.4	40.078	0.0055617	441760000	68304000	373460000	0	0	0	0	0	0	0	0	0	1	0	0	0	1	A6NED2	A6NED2	RCC1 domain-containing protein 1	RCCD1
NaN	NaN	NaN	NaN	NaN	NaN	NaN	NaN	NaN	NaN	NaN	NaN	NaN	NaN				1	1	1	2.3	2.3	2.3	108.44	0.0015329	159330000	98042000	61283000	0	0	0	0	1	0	1	0	1	0	0	1	0	0	A6NFI3	A6NFI3	Zinc finger protein 316	ZNF316
NaN	NaN	NaN	NaN	NaN	NaN	NaN	NaN	NaN	NaN	0.93359	NaN	NaN	NaN				2	2	2	4.7	4.7	4.7	61.77	0.0087416	9531000000	4508400000	5022600000	0	0	0	1	0	0	0	1	1	0	1	0	0	0	P36268;P36268-2;A6NGU5;P36268-3;P19440;B5MD39;P19440-2	P36268;P36268-2;A6NGU5;P36268-3;P19440;B5MD39;P19440-2	Gamma-glutamyltranspeptidase 2;Gamma-glutamyltranspeptidase 2 heavy chain;Gamma-glutamyltranspeptidase 2 light chain;Putative gamma-glutamyltranspeptidase 3;Putative gamma-glutamyltranspeptidase 3 heavy chain;Putative gamma-glutamyltranspeptidase 3 light chain;Gamma-glutamyltranspeptidase 1;Gamma-glutamyltranspeptidase 1 heavy chain;Gamma-glutamyltranspeptidase 1 light chain;Putative gamma-glutam…	GGT2;GGT3P;GGT1;GGTLC3
NaN	NaN	NaN	NaN	NaN	NaN	NaN	NaN	NaN	NaN	NaN	NaN	NaN	NaN				6	1	1	12.8	4.2	4.2	45.517	0	3996000000	1742900000	2253100000	5	5	5	5	5	5	5	5	5	5	5	6	4	5	A6NHL2-2;A6NHL2	A6NHL2-2;A6NHL2	Tubulin alpha chain-like 3	TUBAL3
0.80702	0.8776	1.0788	0.93208	0.65918	NaN	0.74544	0.9602	0.72979	NaN	0.98749	NaN	0.4455	NaN				5	3	3	17.1	9.3	9.3	34.803	0	19292000000	9886600000	9405600000	3	4	4	4	4	2	4	4	4	3	4	3	4	3	A6NHQ2	A6NHQ2	rRNA/tRNA 2-O-methyltransferase fibrillarin-like protein 1	FBLL1
0.98198	0.83589	0.87688	0.85767	0.69537	1.1543	0.52011	1.0311	0.68842	0.83114	0.80461	0.83499	0.80036	0.72435				48	48	48	29.5	29.5	29.5	226.37	0	56718000000	31891000000	24828000000	22	20	21	23	22	20	23	24	29	25	28	27	24	26	A6NHR9;A6NHR9-2;A6NHR9-3	A6NHR9;A6NHR9-2	Structural maintenance of chromosomes flexible hinge domain-containing protein 1	SMCHD1
NaN	NaN	NaN	NaN	NaN	NaN	NaN	NaN	NaN	NaN	NaN	NaN	NaN	NaN				2	2	2	7.6	7.6	7.6	36.056	0	491860000	218320000	273540000	0	2	1	1	1	0	0	1	1	1	1	1	0	1	A6NHX0;Q8WTX7	A6NHX0;Q8WTX7	GATS-like protein 2;GATS-like protein 3	GATSL2;GATSL3
NaN	NaN	NaN	NaN	NaN	NaN	NaN	NaN	NaN	NaN	NaN	NaN	NaN	NaN				1	1	1	6.8	6.8	6.8	28.136	0	949620000	258800000	690820000	1	1	0	1	0	0	1	1	1	1	1	1	1	1	A6NIH7	A6NIH7	Protein unc-119 homolog B	UNC119B
NaN	NaN	NaN	NaN	NaN	NaN	NaN	NaN	NaN	NaN	NaN	NaN	NaN	NaN				2	2	2	7.1	7.1	7.1	46.121	0	181810000	102770000	79033000	0	0	1	0	2	0	1	0	0	0	0	0	0	0	A6NJ78	A6NJ78	Probable methyltransferase-like protein 15	METTL15
0.90563	0.77772	0.76709	0.75393	NaN	NaN	NaN	NaN	NaN	NaN	NaN	NaN	0.77657	NaN				27	2	1	17.4	1.3	0.7	197.48	0.0013459	6281200000	3148800000	3132400000	16	17	17	18	18	14	18	12	15	15	15	16	13	15	A6NKT7;Q7Z3J3	A6NKT7;Q7Z3J3	RanBP2-like and GRIP domain-containing protein 3;RanBP2-like and GRIP domain-containing protein 4	RGPD3;RGPD4
NaN	NaN	NaN	NaN	NaN	NaN	NaN	NaN	NaN	NaN	NaN	NaN	NaN	NaN				1	1	1	1.9	1.9	1.9	94.057	0.0078596	6768500000	3740300000	3028200000	0	0	0	0	0	1	0	1	1	0	0	0	1	0	A6NNC1	A6NNC1	Putative POM121-like protein 1-like
NaN	NaN	NaN	NaN	NaN	NaN	NaN	NaN	NaN	NaN	NaN	NaN	NaN	NaN				4	4	4	3.8	3.8	3.8	197.3	0.0096102	970930000	681650000	289270000	1	0	0	2	0	1	0	0	0	0	1	1	0	0	A7E2V4;A7E2V4-5;A7E2V4-3;A7E2V4-4;A7E2V4-2	A7E2V4;A7E2V4-5;A7E2V4-3;A7E2V4-4;A7E2V4-2	Zinc finger SWIM domain-containing protein 8	ZSWIM8
NaN	NaN	NaN	NaN	NaN	NaN	NaN	NaN	NaN	NaN	NaN	NaN	NaN	NaN				6	6	6	7.6	7.6	7.6	125.06	0	394680000	312750000	81934000	2	2	1	2	3	1	2	1	0	0	0	1	0	1	A8CG34;Q96HA1;Q96HA1-2;A8CG34-2;Q96HA1-3;Q6PJE2;Q6PJE2-5;A6NF01	A8CG34;Q96HA1;Q96HA1-2;A8CG34-2;Q96HA1-3;Q6PJE2;Q6PJE2-5	Nuclear envelope pore membrane protein POM 121C;Nuclear envelope pore membrane protein POM 121;POM121 and ZP3 fusion protein	POM121C;POM121;POMZP3
NaN	1.3423	NaN	NaN	NaN	NaN	NaN	NaN	NaN	NaN	NaN	NaN	NaN	NaN				5	5	2	7.3	7.3	3.5	101.81	0	453520000	233560000	219950000	0	2	1	2	1	0	1	2	1	1	0	1	2	1	A8MPP1;Q96FC9;Q96FC9-2;Q96FC9-4;Q96FC9-3	A8MPP1;Q96FC9;Q96FC9-2;Q96FC9-4;Q96FC9-3	Putative ATP-dependent RNA helicase DDX11-like protein 8;Probable ATP-dependent RNA helicase DDX11	DDX11L8;DDX11
1.0436	0.9545	1.013	NaN	0.79128	1.088	NaN	0.91486	0.72806	0.98721	0.79864	0.77277	0.77573	0.73422				2	2	2	26.3	26.3	26.3	8.496	0	23205000000	12573000000	10633000000	1	1	1	1	1	1	1	1	2	2	2	2	2	2	P62308;A8MWD9	P62308;A8MWD9	Small nuclear ribonucleoprotein G;Small nuclear ribonucleoprotein G-like protein	SNRPG
NaN	NaN	NaN	NaN	0.75738	NaN	NaN	NaN	NaN	NaN	NaN	NaN	NaN	NaN				3	3	3	16.7	16.7	16.7	25.423	0	1568500000	986610000	581840000	1	3	2	3	2	1	1	1	2	1	2	1	1	1	A9UHW6;A9UHW6-2;A9UHW6-3	A9UHW6;A9UHW6-2;A9UHW6-3	MIF4G domain-containing protein	MIF4GD
NaN	NaN	0.98317	NaN	NaN	NaN	NaN	NaN	NaN	1.1395	0.86403	NaN	NaN	NaN				5	5	5	13.8	13.8	13.8	52.916	0	2236600000	1114400000	1122200000	1	1	2	1	1	2	0	1	1	2	2	0	1	1	B7ZAQ6;B7ZAQ6-3;P0CG08;B7ZAQ6-2;B7ZAQ6-4	B7ZAQ6;B7ZAQ6-3;P0CG08;B7ZAQ6-2	Golgi pH regulator A;Golgi pH regulator B	GPR89A;GPR89B
NaN	NaN	NaN	NaN	NaN	NaN	NaN	NaN	NaN	0.71062	NaN	NaN	0.68486	NaN				5	5	5	13.6	13.6	13.6	49.994	0	1725500000	932970000	792530000	1	1	2	2	2	2	0	3	3	2	1	3	3	2	C4AMC7;Q6VEQ5;Q9NQA3;A8K0Z3;A8MWX3	C4AMC7;Q6VEQ5;Q9NQA3;A8K0Z3	Putative WAS protein family homolog 3;WAS protein family homolog 2;WAS protein family homolog 6;WAS protein family homolog 1	WASH3P;WASH2P;WASH6P;WASH1
NaN	NaN	NaN	NaN	NaN	NaN	NaN	NaN	NaN	NaN	NaN	NaN	NaN	NaN	+		+	7	2	2	9.3	3.4	3.4	59.299	1	439520000	270210000	169310000	4	4	4	4	4	4	4	5	5	4	4	4	4	4	CON__ENSEMBL:ENSBTAP00000025008;Q9H4B7	CON__ENSEMBL:ENSBTAP00000025008;Q9H4B7	Tubulin beta-1 chain	TUBB1
NaN	2.1546	2.2692	2.2862	1.6006	2.9202	0.85976	0.91042	3.2607	3.1495	3.1804	2.5466	2.6569	2.353			+	3	3	2	20.8	20.8	17.3	24.409	0	44164000000	11554000000	32610000000	1	2	2	1	2	2	1	2	1	2	2	2	2	2	CON__P00761	CON__P00761
NaN	NaN	NaN	NaN	NaN	NaN	NaN	NaN	NaN	NaN	NaN	NaN	NaN	NaN			+	2	2	2	8.5	8.5	8.5	39.234	0	704650000	318740000	385910000	0	1	1	1	0	0	0	1	1	1	1	1	1	1	CON__P00978	CON__P00978
NaN	NaN	NaN	1.2	0.83487	1.2117	0.52133	NaN	0.7411	0.87555	0.80725	0.76384	0.76193	0.67135			+	1	1	1	2.6	2.6	2.6	68.709	0.0019044	56672000000	32705000000	23966000000	1	0	1	1	1	1	1	0	1	1	1	1	1	1	CON__P01045-1;CON__Q2KJ62;CON__P01044-1	CON__P01045-1;CON__Q2KJ62;CON__P01044-1
0.95008	0.79846	0.67254	0.75733	0.48496	0.92001	0.53821	0.98463	0.80557	0.87996	0.85769	0.87669	0.89767	0.85667			+	8	8	8	63.4	63.4	63.4	15.184	0	138370000000	77399000000	60971000000	7	7	7	7	7	7	6	6	7	7	7	8	6	7	CON__P01966;P69905;P02008	CON__P01966;P69905	Hemoglobin subunit alpha	HBA1
NaN	NaN	NaN	0.94456	0.79566	1.4881	0.94726	0.99479	0.39424	NaN	1.6743	NaN	0.87798	NaN			+	24	10	1	44.9	23.7	3.2	51.561	0	12557000000	6802300000	5755100000	12	14	14	16	17	13	17	10	12	12	18	11	13	10	P02533;CON__P02533;Q7Z3Y9;CON__Q7Z3Y9	P02533;CON__P02533	Keratin, type I cytoskeletal 14	KRT14
NaN	NaN	NaN	NaN	NaN	NaN	NaN	NaN	NaN	NaN	NaN	NaN	NaN	NaN			+	13	3	1	20.2	8.2	3	60.044	0	181340000	55758000	125580000	8	7	7	8	8	7	6	7	9	8	9	8	7	9	P02538;P48668;CON__P48668;CON__P02538	P02538;P48668;CON__P48668;CON__P02538	Keratin, type II cytoskeletal 6A;Keratin, type II cytoskeletal 6C	KRT6A;KRT6C
NaN	NaN	NaN	NaN	NaN	NaN	NaN	NaN	NaN	NaN	NaN	NaN	NaN	NaN			+	2	2	2	12.6	12.6	12.6	22.975	0.00020475	245600000	77109000	168500000	0	0	0	0	0	0	0	0	1	0	1	0	0	0	CON__P02662	CON__P02662
NaN	NaN	NaN	NaN	NaN	NaN	NaN	NaN	NaN	NaN	NaN	NaN	NaN	NaN			+	1	1	1	8.6	8.6	8.6	18.281	0.00058916	60697000	0	60697000	0	0	0	0	0	0	1	0	0	0	0	0	0	0	CON__P02754	CON__P02754
0.96038	0.83664	0.83953	0.89701	0.65146	1.1901	0.59344	0.99981	0.84734	0.81753	0.75648	0.8342	0.75371	0.80409			+	35	35	35	61.4	61.4	61.4	69.293	0	322280000000	175230000000	147050000000	26	27	26	26	28	27	26	23	23	23	26	25	25	25	CON__P02769;P02768;CON__P02768-1;P02768-2;P02768-3	CON__P02769
1.004	NaN	NaN	1.2039	NaN	2.0533	NaN	NaN	NaN	NaN	NaN	NaN	NaN	NaN			+	19	1	1	28.4	4.7	4.7	47.538	0	1557900000	752180000	805710000	16	15	16	16	15	15	16	13	14	15	14	15	14	13	CON__P05784	CON__P05784
0.9926	0.89232	0.9346	0.93189	0.71595	1.2518	0.51916	1.0027	0.74935	0.77916	0.84394	0.7962	0.83444	0.6826			+	57	54	43	89.9	88	79.7	53.704	0	10943000000000	5873300000000	5069900000000	50	50	46	51	49	48	48	42	41	42	43	42	41	41	P05787;CON__P05787;P05787-2;CON__H-INV:HIT000292931;CON__Q9H552;CON__H-INV:HIT000016045	P05787;CON__P05787;P05787-2	Keratin, type II cytoskeletal 8	KRT8
NaN	1.0009	0.85458	0.80658	0.75184	1.2171	0.41627	1.1268	0.66937	0.75433	0.87798	0.86328	0.74841	NaN			+	12	12	12	23.3	23.3	23.3	91.215	0	6835500000	4368000000	2467500000	2	8	7	7	5	3	8	3	4	4	4	3	3	3	CON__P06868	CON__P06868
1.0266	0.94203	0.89006	0.93704	0.61129	1.1999	0.7091	NaN	0.6376	0.82289	0.8165	NaN	0.81598	0.82351			+	2	1	1	7.3	4	4	26.558	0	73408000000	38325000000	35083000000	2	2	2	2	2	2	2	2	2	2	2	2	2	2	P07477;CON__P07477;Q9BYE2;Q9BYE2-3;Q9BYE2-5;Q9BYE2-2	P07477;CON__P07477;Q9BYE2;Q9BYE2-3;Q9BYE2-5;Q9BYE2-2	Trypsin-1;Alpha-trypsin chain 1;Alpha-trypsin chain 2;Transmembrane protease serine 13	PRSS1;TMPRSS13
1.0132	0.92941	0.96813	0.91892	0.72302	1.2638	0.53121	1.0288	0.69079	0.80902	0.81204	0.79592	0.77775	0.73542			+	41	36	4	67.8	60.1	7	51.417	0	1403300000000	776200000000	627140000000	34	34	34	33	31	33	36	31	31	30	31	32	31	30	CON__P08729;Q14533;Q8N1N4-2;CON__Q61726;Q86Y46;Q86Y46-2;CON__Q32MB2	CON__P08729
NaN	NaN	NaN	NaN	NaN	NaN	NaN	NaN	NaN	NaN	2.1373	NaN	NaN	NaN			+	15	3	1	29.2	8	4	51.267	0	1171600000	700330000	471260000	5	7	6	7	8	6	9	6	5	7	12	6	7	6	P08779;CON__P08779	P08779;CON__P08779	Keratin, type I cytoskeletal 16	KRT16
1.001	0.94943	0.8931	0.87283	0.70819	1.1614	0.56784	1.084	0.97078	0.84588	0.86236	0.83289	0.87237	0.83828			+	9	9	9	34.3	34.3	34.3	38.418	0	145990000000	77738000000	68254000000	9	8	8	8	9	9	8	8	8	8	7	8	8	8	CON__P12763;P02765	CON__P12763
0.91869	2.2248	1.3572	1.3176	1.001	2.1457	1.0361	1.0768	0.69236	0.72095	1.0842	0.86751	0.99446	0.65117			+	20	16	14	34.9	32.2	29.1	58.826	0	44951000000	18686000000	26265000000	9	14	9	12	13	13	15	12	10	10	13	12	11	10	P13645;CON__P13645;CON__P02535-1	P13645;CON__P13645	Keratin, type I cytoskeletal 10	KRT10
NaN	NaN	NaN	NaN	NaN	NaN	NaN	0.76207	0.81883	0.93795	NaN	0.87618	NaN	0.86062			+	5	5	5	23	23	23	30.276	0	1178200000	710700000	467550000	0	1	1	1	1	0	3	2	2	1	1	1	2	1	CON__P15497	CON__P15497
0.95556	1.0568	1.1868	1.2619	1.1576	2.1948	0.53891	0.99402	1.3087	0.92135	1.3062	1.265	1.8988	1.3305			+	16	16	16	20.4	20.4	20.4	68.124	0	5726200000000	2576700000000	3149500000000	9	12	11	12	11	10	16	10	10	8	10	10	14	9	CON__P15636	CON__P15636
NaN	NaN	NaN	NaN	NaN	NaN	NaN	NaN	NaN	NaN	NaN	NaN	NaN	NaN			+	1	1	1	4.9	4.9	4.9	38.252	0.0071625	269780000	109150000	160630000	0	1	1	0	0	1	0	1	1	0	0	0	0	0	CON__P17690	CON__P17690
0.93434	0.9254	0.83084	0.84091	0.61444	1.194	0.5124	0.89354	0.75126	NaN	0.80246	0.72899	NaN	NaN			+	9	9	9	20.9	20.9	20.9	46.103	0	12095000000	6592900000	5501900000	5	4	6	5	2	5	2	2	3	1	1	2	2	1	CON__P34955	CON__P34955
1.0139	0.7462	0.98135	0.99206	0.57832	1.3235	0.4438	0.96919	0.86411	0.73439	2.8892	1.6991	1.9323	0.89505			+	17	16	16	36.4	35.3	35.3	62.064	0	31882000000	14877000000	17005000000	10	13	14	11	9	11	11	8	9	6	12	10	13	9	P35527;CON__P35527	P35527;CON__P35527	Keratin, type I cytoskeletal 9	KRT9
NaN	1.3044	1.0581	1.0269	0.85278	NaN	NaN	1.0171	0.72797	0.74237	1.539	0.91171	1.0327	0.67917			+	19	14	7	30.5	24.6	14.2	65.432	0	7103500000	3854900000	3248600000	6	8	7	6	7	7	5	12	12	11	11	10	13	10	P35908;CON__P35908	P35908;CON__P35908	Keratin, type II cytoskeletal 2 epidermal	KRT2
NaN	NaN	NaN	NaN	NaN	NaN	NaN	NaN	NaN	NaN	0.56506	NaN	NaN	NaN			+	4	2	1	5.3	3.6	2.2	55.802	0.001532	6434200000	3493000000	2941200000	2	3	3	3	3	2	3	2	2	2	3	3	2	3	P78386;CON__P78386	P78386;CON__P78386	Keratin, type II cuticular Hb5	KRT85
NaN	NaN	NaN	NaN	NaN	NaN	NaN	NaN	NaN	NaN	NaN	NaN	NaN	NaN			+	1	1	1	10	10	10	11.202	0	2897700000	2422200000	475430000	1	1	1	0	1	1	1	1	1	1	1	1	1	1	CON__P81644	CON__P81644
0.99741	0.92139	0.87526	0.8863	0.74372	1.2318	0.51683	1.0232	0.67505	0.78581	0.86842	0.78844	0.7862	0.72386			+	35	34	9	73.4	73.4	30.6	48.105	0	304690000000	164150000000	140540000000	27	28	30	28	27	27	27	21	20	24	21	23	23	21	Q04695;CON__Q04695;CON__Q61782;P35900;CON__P35900	Q04695;CON__Q04695	Keratin, type I cytoskeletal 17	KRT17
1.0762	0.88507	0.92268	0.84836	0.77048	1.2951	0.67619	1.0649	0.76457	0.83344	0.86502	0.90189	0.92236	0.83583			+	29	28	28	56.4	54.3	54.3	75.829	0	114000000000	61865000000	52134000000	21	21	20	23	20	22	18	23	20	22	18	18	22	21	CON__Q29443;CON__Q0IIK2;P02788;CON__Q2HJF0;P02788-2	CON__Q29443;CON__Q0IIK2
1.0838	1.1816	1.1419	1.2795	0.93606	1.717	0.57013	1.0926	0.81697	1.1145	0.94368	1.0393	0.90388	0.93469			+	38	2	2	68.7	6	6	51.385	0	155160000000	79146000000	76013000000	33	33	33	33	31	33	35	31	31	30	31	32	31	30	P08729;CON__Q3KNV1	P08729;CON__Q3KNV1	Keratin, type II cytoskeletal 7	KRT7
0.90045	0.74806	0.79523	0.71976	0.53768	0.86469	0.50099	0.97866	0.7516	0.83215	0.81148	0.97049	0.77373	0.89335			+	11	11	9	55.2	55.2	44.8	22.06	0	98366000000	54699000000	43667000000	8	9	8	9	8	9	7	7	8	9	7	7	8	8	CON__Q3SX09;P68871;P02042;P69892;P69891;P02100	CON__Q3SX09
NaN	NaN	NaN	NaN	NaN	NaN	NaN	NaN	NaN	NaN	NaN	NaN	NaN	NaN			+	26	1	0	57	4.6	0	33.012	0	1778000000	953860000	824100000	21	21	19	17	19	22	20	14	15	15	18	15	14	17	CON__Q3SX28	CON__Q3SX28
NaN	NaN	NaN	NaN	NaN	NaN	NaN	NaN	NaN	NaN	NaN	NaN	NaN	NaN			+	1	1	1	3.5	3.5	3.5	45.456	0.00078324	16342000	7522000	8820000	0	0	0	0	0	0	0	1	1	0	0	1	0	0	CON__Q3SZH5	CON__Q3SZH5
0.93527	0.74621	0.79295	0.86185	0.584	1.18	0.79419	0.86322	0.93272	0.94668	0.91159	1.1626	NaN	NaN			+	6	2	2	14.4	4.8	4.8	62.87	0	58378000000	32172000000	26206000000	5	5	6	6	6	6	6	6	5	5	6	6	6	5	CON__Q3ZBD7	CON__Q3ZBD7
1.0801	0.74648	0.81304	NaN	NaN	0.8143	0.42102	0.96978	0.6997	0.88376	0.75646	0.76055	0.57312	0.70179			+	8	8	7	20	20	16.9	54.099	0	5596500000	2544400000	3052100000	1	2	2	3	2	2	3	3	4	4	4	4	4	6	CON__Q3ZBS7	CON__Q3ZBS7
1.0471	1.2871	NaN	1.1166	NaN	NaN	0.60291	1.0369	0.64255	0.77222	0.89338	0.7264	0.73312	0.6639	+		+	5	3	2	9	5.5	3.1	50.529	1	515290000000	276290000000	239000000000	3	3	3	3	3	2	3	3	4	4	4	4	4	4	CON__Q497I4;Q92764;Q14532;CON__Q14532	CON__Q497I4;Q92764	Keratin, type I cuticular Ha5	KRT35
NaN	NaN	NaN	NaN	NaN	NaN	NaN	NaN	NaN	NaN	NaN	NaN	NaN	NaN			+	2	2	2	10.3	10.3	10.3	42.663	0	0	0	0	1	0	0	0	1	0	0	0	0	0	0	0	0	0	CON__Q58D62	CON__Q58D62
NaN	NaN	NaN	NaN	NaN	NaN	NaN	NaN	NaN	NaN	NaN	NaN	NaN	NaN			+	10	1	0	14.6	1.9	0	57.835	0.0024612	14217000000	7719100000	6498000000	8	7	6	6	6	6	8	7	8	7	7	8	8	9	Q5XKE5;CON__Q5XKE5;CON__Q01546	Q5XKE5;CON__Q5XKE5;CON__Q01546	Keratin, type II cytoskeletal 79	KRT79
NaN	0.86439	0.94035	NaN	NaN	1.2532	0.43798	NaN	0.60258	0.65844	0.71246	0.69546	0.68499	0.65371			+	13	2	0	15.3	3.7	0	62.936	0.0026455	503440000000	281820000000	221620000000	8	9	9	10	10	9	9	9	9	9	10	9	9	10	CON__Q5XQN5	CON__Q5XQN5
0.9178	1.0552	0.90013	0.99725	0.60579	1.0848	0.47869	1.175	0.5567	0.87318	0.83428	0.87226	1.2832	0.71866			+	10	9	8	27.9	25.2	23.7	50.525	0	5818600000	3320100000	2498500000	5	5	5	6	5	6	6	3	5	5	5	4	2	6	Q6KB66;Q6KB66-2;CON__Q6KB66-1;Q6KB66-3	Q6KB66;Q6KB66-2;CON__Q6KB66-1;Q6KB66-3	Keratin, type II cytoskeletal 80	KRT80
NaN	0.96732	0.98838	NaN	0.68263	NaN	NaN	NaN	NaN	NaN	NaN	NaN	NaN	NaN			+	10	2	2	19.3	4.4	4.4	50.708	0.00059043	9975400000	5628600000	4346800000	9	10	10	8	9	9	9	10	9	9	9	8	8	8	CON__Q9DCV7	CON__Q9DCV7
0.95805	0.69002	0.64879	0.75644	0.61848	1.3835	0.38714	NaN	NaN	NaN	NaN	NaN	NaN	NaN			+	6	6	6	8.8	8.8	8.8	106.19	0	7726600000	4233700000	3492900000	2	3	4	3	4	2	3	0	1	1	2	2	2	0	CON__Q9TRI1;P19823	CON__Q9TRI1
NaN	NaN	NaN	NaN	NaN	NaN	NaN	NaN	NaN	NaN	NaN	NaN	NaN	NaN	+		+	7	4	3	34.3	22.5	16.9	23.122	1	1900400000	1677000000	223440000	3	3	3	3	3	3	5	3	2	4	3	2	2	2	CON__REFSEQ:XP_092267	CON__REFSEQ:XP_092267
1.0279	0.91671	0.92628	0.94952	0.68441	1.316	0.61357	0.96425	0.66306	0.78705	0.80988	0.83715	0.80703	0.76285				10	10	9	4.7	4.7	4.7	205.42	0	627450000000	380930000000	246520000000	6	6	7	7	7	5	5	5	5	5	5	5	5	5	E9PAV3;E9PAV3-2;Q13765;Q9BZK3	E9PAV3;E9PAV3-2;Q13765	Nascent polypeptide-associated complex subunit alpha	NACA
0.61364	NaN	NaN	0.93676	0.95954	NaN	0.58862	1.6295	NaN	1.8533	0.98252	1.8884	2.6571	1.181				3	3	3	18.9	18.9	18.9	13.798	0	9564900000	4453900000	5111000000	2	2	2	2	3	2	3	2	1	2	2	2	2	2	E9PRG8	E9PRG8		C11orf48
1.058	0.94475	0.99125	1.0222	0.74563	1.4387	0.56714	1.0267	0.70468	1.0758	1.178	1.0354	0.62718	0.84043				8	8	8	21.7	21.7	21.7	39.58	0	40710000000	22057000000	18653000000	5	6	6	5	5	4	3	5	6	4	4	4	5	4	O00115;O00115-2	O00115;O00115-2	Deoxyribonuclease-2-alpha	DNASE2
1.07	0.92176	0.95402	0.9046	0.64072	1.2385	0.57863	1.0583	0.67991	0.83451	0.76309	0.81649	0.77719	0.74155				22	22	22	43.8	43.8	43.8	72.911	0	62884000000	33102000000	29782000000	14	14	14	13	14	11	12	14	14	12	12	14	13	13	O00116	O00116	Alkyldihydroxyacetonephosphate synthase, peroxisomal	AGPS
1.038	1.0039	0.91209	0.91494	0.77042	1.3605	0.56214	1.0697	0.72628	0.83442	0.93449	0.83557	0.97031	0.65489				15	15	14	27.3	27.3	25	75.042	0	12543000000	6940400000	5603100000	9	8	7	9	9	7	9	8	9	7	6	9	10	7	O00139-2;O00139;O00139-1;O00139-5;O00139-4	O00139-2;O00139;O00139-1;O00139-5;O00139-4	Kinesin-like protein KIF2A	KIF2A
NaN	NaN	NaN	0.92428	NaN	NaN	NaN	NaN	NaN	NaN	NaN	NaN	NaN	NaN				2	2	2	7.5	7.5	7.5	31.004	0.00020396	2275500000	1178400000	1097100000	1	2	2	2	1	2	0	1	0	0	0	0	0	0	O00142;O00142-4;O00142-2;O00142-3	O00142;O00142-4;O00142-2;O00142-3	Thymidine kinase 2, mitochondrial	TK2
0.99891	0.92151	0.88838	0.88727	0.7246	1.2828	0.56362	1.0298	0.76737	0.84472	0.80872	0.84348	0.80278	0.72272				24	10	10	57.4	30.2	30.2	49.129	0	128120000000	69545000000	58579000000	18	20	18	18	18	21	19	20	19	20	20	19	18	18	O00148;O00148-2;O00148-3	O00148;O00148-2;O00148-3	ATP-dependent RNA helicase DDX39A	DDX39A
1.0187	0.98935	0.94373	1.0084	0.75652	1.3986	0.69328	0.99781	0.72539	0.84623	0.76841	0.85283	0.80623	0.79399				17	17	17	63.8	63.8	63.8	36.071	0	156360000000	73003000000	83353000000	13	13	13	14	13	14	14	11	12	14	12	12	12	12	O00151	O00151	PDZ and LIM domain protein 1	PDLIM1
1.0068	0.98329	1.0416	0.95495	0.73497	1.3945	0.62348	1.0259	0.67619	0.90844	0.79441	0.93289	0.93715	0.78536				12	12	12	43.5	43.5	43.5	37.419	0	74390000000	38322000000	36068000000	7	9	8	10	8	9	8	9	7	7	8	7	7	7	O00154-4;O00154;O00154-6;O00154-7;O00154-5;O00154-2;O00154-3	O00154-4;O00154;O00154-6;O00154-7;O00154-5;O00154-2;O00154-3	Cytosolic acyl coenzyme A thioester hydrolase	ACOT7
1.0078	0.94412	0.94487	0.86961	0.65053	1.314	0.6497	0.98501	0.6757	0.87015	0.87797	0.91405	0.79255	0.81943				49	49	2	47.3	47.3	1.1	121.68	0	239280000000	130620000000	108660000000	32	28	30	29	32	33	32	29	29	31	28	28	29	28	O00159;O00159-3	O00159;O00159-3	Unconventional myosin-Ic	MYO1C
NaN	NaN	NaN	NaN	NaN	NaN	NaN	NaN	NaN	NaN	NaN	NaN	NaN	NaN				48	1	1	48.5	0.8	0.8	117.91	0.003012	0	0	0	32	29	30	29	32	33	33	30	29	32	29	28	28	28	O00159-2;Q8N1T3;Q8N1T3-3	O00159-2	Unconventional myosin-Ic	MYO1C
0.99451	0.94217	0.97637	0.98787	0.76659	1.3179	0.91294	0.93587	0.67266	0.79202	0.81745	0.73531	0.79512	0.67564				12	12	4	79.1	79.1	37	23.354	0	14839000000	7928500000	6910200000	6	9	8	8	8	9	10	5	4	5	7	8	6	6	O00161	O00161	Synaptosomal-associated protein 23	SNAP23
NaN	NaN	NaN	NaN	NaN	NaN	NaN	NaN	NaN	0.88667	0.70429	NaN	0.88069	NaN				5	5	5	26.2	26.2	26.2	31.62	0	2149500000	1143500000	1006000000	1	2	2	2	2	2	3	2	1	2	3	0	2	2	O00165;O00165-5;O00165-2;O00165-3;O00165-4;O00165-6	O00165;O00165-5;O00165-2;O00165-3	HCLS1-associated protein X-1	HAX1
1.0549	0.99329	1.0047	1.0043	0.72762	1.4363	0.55963	1.0066	0.70143	0.83731	0.83167	0.80919	0.75169	0.69965				12	12	12	46.4	46.4	46.4	37.636	0	311030000000	153720000000	157310000000	8	9	9	9	9	9	8	10	9	7	7	9	8	9	O00170	O00170	AH receptor-interacting protein	AIP
NaN	0.91476	1.0518	0.85518	0.69393	1.3353	0.54261	0.98027	0.75675	0.91484	0.91546	0.94875	0.86726	0.89216				9	9	9	16	16	16	72.453	0	9152700000	5318800000	3833900000	4	4	7	4	5	5	3	3	3	5	4	5	5	6	O00178	O00178	GTP-binding protein 1	GTPBP1
NaN	NaN	NaN	NaN	NaN	NaN	NaN	NaN	NaN	NaN	NaN	NaN	NaN	NaN				1	1	1	5.7	5.7	5.7	38.143	0.0039341	110000000	53763000	56240000	0	0	0	0	0	0	0	0	0	1	0	1	0	0	O00180	O00180	Potassium channel subfamily K member 1	KCNK1
1.2278	0.98051	0.96471	0.9641	0.62361	1.5297	0.55551	0.99843	0.61426	0.76113	0.87548	0.76815	0.75681	0.68285				13	13	13	25.8	25.8	25.8	67.764	0	18830000000	10883000000	7946400000	7	8	8	7	8	7	9	7	9	6	9	9	9	8	O00186	O00186	Syntaxin-binding protein 3	STXBP3
NaN	NaN	NaN	NaN	NaN	NaN	NaN	0.92426	0.61244	0.77802	0.67899	NaN	0.6504	0.77557				3	3	3	8.4	8.4	8.4	49.976	0.00020342	1181700000	736710000	444990000	0	0	0	1	0	0	1	1	2	1	1	1	1	1	O00189	O00189	AP-4 complex subunit mu-1	AP4M1
0.93982	0.91924	0.92584	1.0046	0.80295	1.4462	1.2517	0.98145	0.91175	1.0137	1.1803	1.1963	1.243	NaN				7	7	7	31.7	31.7	31.7	20.332	0	35931000000	17236000000	18695000000	3	2	2	4	4	3	3	3	3	2	2	3	2	2	O00193	O00193	Small acidic protein	SMAP
NaN	NaN	NaN	NaN	NaN	NaN	NaN	NaN	NaN	NaN	NaN	NaN	NaN	NaN				1	1	1	8.3	8.3	8.3	24.608	0.00059312	60130000	60130000	0	0	1	1	0	0	0	0	0	1	0	0	0	0	0	O00194	O00194	Ras-related protein Rab-27B	RAB27B
1.0541	0.93182	0.86973	0.92329	0.73439	1.2111	0.56523	1.0118	0.61415	0.74211	0.73013	0.77576	0.72439	0.69838				26	26	26	24.9	24.9	24.9	121.32	0	97392000000	54717000000	42675000000	13	16	13	14	17	14	14	14	13	14	15	16	12	13	O00203;O00203-3;Q13367;Q13367-3;Q13367-4	O00203;O00203-3	AP-3 complex subunit beta-1	AP3B1
1.1725	0.94004	0.9433	0.909	0.72836	1.4645	0.60874	1.0116	0.63842	0.84234	0.84485	0.83099	0.79887	0.76511				4	4	4	19.5	19.5	19.5	23.705	0	24834000000	13268000000	11567000000	3	3	3	3	3	3	4	3	3	2	2	2	3	3	O00217	O00217	NADH dehydrogenase [ubiquinone] iron-sulfur protein 8, mitochondrial	NDUFS8
NaN	NaN	NaN	NaN	NaN	NaN	NaN	NaN	NaN	NaN	NaN	NaN	NaN	NaN				1	1	1	3.4	3.4	3.4	50.089	0.0078439	14409000	14409000	0	0	0	0	0	0	0	0	0	0	0	0	1	1	0	O00220	O00220	Tumor necrosis factor receptor superfamily member 10A	TNFRSF10A
0.97713	0.87992	0.96041	0.92755	0.69939	1.2415	0.65723	0.99041	0.67707	0.90052	0.84942	0.90072	0.73955	0.71043				24	24	24	61.4	61.4	61.4	47.463	0	367700000000	199060000000	168650000000	20	21	20	20	21	20	20	19	22	20	19	20	19	19	O00231;O00231-2	O00231;O00231-2	26S proteasome non-ATPase regulatory subunit 11	PSMD11
0.95998	0.9928	0.9446	0.97893	0.71892	1.3539	0.58198	0.99072	0.70328	0.8238	0.79354	0.76494	0.67783	0.68747				21	21	21	49.8	49.8	49.8	52.904	0	152810000000	82592000000	70222000000	15	15	16	17	12	15	14	12	12	13	12	12	14	13	O00232;O00232-2	O00232;O00232-2	26S proteasome non-ATPase regulatory subunit 12	PSMD12
0.95811	0.83458	0.86084	0.85717	0.7284	1.2569	0.49452	0.96593	0.67526	0.75769	0.75798	0.79261	0.66487	0.6843				12	12	12	54.7	54.7	54.7	24.682	0	51098000000	26645000000	24453000000	5	8	6	7	8	7	8	6	5	5	5	6	5	5	O00233;O00233-2;O00233-3	O00233;O00233-2	26S proteasome non-ATPase regulatory subunit 9	PSMD9
1.0738	0.98861	1.0229	1.1662	0.73971	1.4768	0.71443	1.2833	0.80906	0.95181	0.84284	0.96889	0.8964	0.82847				5	5	5	76.5	76.5	76.5	7.4016	0	48246000000	24112000000	24134000000	3	5	5	5	5	3	4	4	4	5	5	4	4	4	O00244	O00244	Copper transport protein ATOX1	ATOX1
NaN	NaN	NaN	NaN	NaN	NaN	NaN	NaN	NaN	NaN	NaN	NaN	NaN	NaN				3	3	3	5.2	5.2	5.2	68.023	0	4269500000	2078000000	2191500000	2	1	1	1	2	1	1	1	1	0	0	0	0	0	O00255;O00255-2;O00255-3	O00255;O00255-2;O00255-3	Menin	MEN1
0.98725	1.0664	1.0306	0.78081	0.86405	1.4366	0.60522	0.96145	0.55983	0.74248	0.79939	0.7028	0.7408	0.676				10	10	9	46.2	46.2	46.2	21.671	0	75602000000	38514000000	37087000000	6	8	6	5	4	6	5	4	5	5	5	4	5	3	O00264;O00264-2	O00264;O00264-2	Membrane-associated progesterone receptor component 1	PGRMC1
0.95569	0.91151	0.96173	1.0117	0.79344	1.3654	0.5697	1.046	0.91361	0.98198	0.76971	1.0354	0.81196	0.77915				37	37	37	42.1	42.1	42.1	121	0	70943000000	35404000000	35539000000	21	21	22	19	18	20	19	20	24	24	25	27	23	23	O00267;O00267-2	O00267;O00267-2	Transcription elongation factor SPT5	SUPT5H
NaN	NaN	1.2613	NaN	NaN	NaN	NaN	NaN	NaN	NaN	NaN	NaN	0.80517	NaN				4	4	4	5.8	5.8	5.8	110.11	0	1073300000	551830000	521520000	1	2	1	1	1	2	1	2	1	2	0	1	1	1	O00268	O00268	Transcription initiation factor TFIID subunit 4	TAF4
0.97138	0.87169	0.92787	0.92708	0.64838	1.2026	0.62031	1.006	0.65622	0.71296	0.70137	0.96647	0.70804	0.68913				14	14	4	45.9	45.9	15.1	36.521	0	33600000000	17958000000	15642000000	7	9	10	12	11	8	8	7	8	7	8	8	9	8	O00273	O00273	DNA fragmentation factor subunit alpha	DFFA
NaN	NaN	NaN	NaN	NaN	NaN	NaN	NaN	NaN	NaN	NaN	NaN	NaN	NaN				11	1	1	45.5	7.5	7.5	29.41	0	308230000	202350000	105880000	7	7	9	11	10	7	7	5	6	5	7	6	7	7	O00273-2	O00273-2	DNA fragmentation factor subunit alpha	DFFA
0.79029	0.7932	NaN	NaN	0.73952	1.27	NaN	NaN	NaN	NaN	NaN	NaN	NaN	NaN				12	11	11	14.1	13.1	13.1	116.22	0	3138700000	1759700000	1378900000	5	6	4	2	3	3	3	3	2	0	2	3	1	1	O00291;O00291-3;O00291-4	O00291;O00291-3;O00291-4	Huntingtin-interacting protein 1	HIP1
1.0184	0.93611	0.98949	0.95342	0.72309	1.3766	0.65278	1.0186	0.78629	0.81553	0.86414	0.82265	0.85223	0.80824				17	17	17	81.3	81.3	81.3	26.922	0	922510000000	490490000000	432020000000	15	16	15	15	14	15	15	16	15	15	15	16	15	17	O00299	O00299	Chloride intracellular channel protein 1	CLIC1
1.0517	0.97632	1.0388	1.0142	0.78783	1.3728	0.58329	0.99905	0.71846	0.89304	0.78319	0.8548	0.72872	0.72964				15	15	15	43.4	43.4	43.4	37.563	0	307460000000	167410000000	140050000000	9	9	11	11	11	9	9	14	13	13	13	11	13	11	O00303	O00303	Eukaryotic translation initiation factor 3 subunit F	EIF3F
NaN	NaN	NaN	NaN	NaN	NaN	NaN	NaN	NaN	NaN	0.60949	NaN	NaN	NaN				3	3	3	8.5	8.5	8.5	63.887	0	547940000	317410000	230530000	1	1	1	1	1	0	1	2	1	0	1	1	1	1	O00311	O00311	Cell division cycle 7-related protein kinase	CDC7
1.125	0.86901	0.90229	0.99565	0.62301	1.2099	0.40226	1.0017	0.59136	0.76819	0.6952	0.68239	0.6676	0.70296				15	15	15	32.7	32.7	32.7	54.122	0	38573000000	21222000000	17350000000	9	10	11	12	10	9	7	7	8	6	8	7	7	8	O00330;O00330-3;O00330-2	O00330;O00330-3;O00330-2	Pyruvate dehydrogenase protein X component, mitochondrial	PDHX
NaN	0.63043	0.70534	0.84302	NaN	0.75347	0.72114	NaN	0.91904	NaN	NaN	NaN	NaN	NaN				3	3	3	21.6	21.6	21.6	20.747	0	2217600000	1256200000	961320000	1	2	2	2	3	1	1	0	1	2	1	1	1	0	O00399	O00399	Dynactin subunit 6	DCTN6
0.9595	0.91132	0.88215	NaN	0.68624	NaN	NaN	0.98989	0.65265	0.74519	0.74815	0.73044	0.65424	0.61666				3	3	3	7.5	7.5	7.5	60.908	0	483540000000	260530000000	223010000000	1	2	1	1	1	1	2	2	2	2	2	2	2	2	O00400	O00400	Acetyl-coenzyme A transporter 1	SLC33A1
0.95858	1.0451	0.9891	0.93238	0.87678	1.3454	0.69746	1.0483	0.83083	0.91692	NaN	0.97057	0.86468	0.74313				8	8	8	23.4	23.4	23.4	54.826	0	14578000000	7440000000	7138000000	5	5	5	4	6	6	6	5	6	5	2	4	5	6	O00401	O00401	Neural Wiskott-Aldrich syndrome protein	WASL
1.0225	0.98782	1.0042	0.98973	0.7751	1.3934	0.6305	1.0291	0.71348	0.82016	0.82623	0.82508	0.76718	0.75262				36	36	4	40.7	40.7	2.9	123.63	0	790480000000	425740000000	364740000000	30	32	30	31	30	34	31	33	33	34	34	34	33	35	O00410;O00410-3	O00410;O00410-3	Importin-5	IPO5
NaN	NaN	NaN	NaN	NaN	1.7656	NaN	NaN	NaN	NaN	NaN	NaN	NaN	NaN	+			33	1	1	40.7	0.7	0.7	116.98	1	1889100000	940500000	948570000	28	29	29	30	30	32	29	29	29	30	30	30	29	31	O00410-2	O00410-2	Importin-5	IPO5
1.0047	0.81437	0.88915	0.93828	0.73053	1.3251	0.51658	1.0096	0.68849	0.83625	0.78428	0.80573	0.74845	0.71237				22	22	22	21	21	21	138.62	0	220850000000	119850000000	101000000000	7	10	8	10	12	9	15	14	12	9	10	12	11	11	O00411	O00411	DNA-directed RNA polymerase, mitochondrial	POLRMT
1.037	0.89472	0.84486	0.8461	0.60408	1.2281	0.53992	0.9719	0.67078	0.78082	0.75118	0.74339	0.71304	0.66686				8	8	8	51	51	51	17.561	0	50336000000	27353000000	22983000000	3	3	3	3	2	2	3	4	3	4	4	3	2	3	O00422	O00422	Histone deacetylase complex subunit SAP18	SAP18
1.0073	0.85774	0.9182	0.89057	0.67559	1.2959	0.58298	1.0318	0.70593	0.82829	0.81022	0.8121	0.81387	0.77149				22	20	20	39.4	35.4	35.4	63.704	0	92586000000	49390000000	43195000000	17	16	16	17	16	18	18	16	17	15	14	16	13	17	O00425;O00425-2	O00425;O00425-2	Insulin-like growth factor 2 mRNA-binding protein 3	IGF2BP3
0.97943	0.97146	0.99948	0.97721	0.71973	1.2947	0.58335	1.0186	0.72444	0.87895	0.84476	0.84794	0.80883	0.79736				33	33	1	53.5	53.5	3	81.876	0	155580000000	80806000000	74771000000	22	23	22	22	21	24	21	21	18	19	19	21	21	20	O00429;O00429-3;O00429-6;O00429-7	O00429;O00429-3;O00429-6;O00429-7	Dynamin-1-like protein	DNM1L
NaN	NaN	NaN	NaN	NaN	NaN	NaN	NaN	NaN	NaN	NaN	NaN	NaN	NaN				33	1	1	54.2	2.9	2.9	80.535	0	2393700000	1397800000	995850000	22	23	22	22	21	24	21	21	18	19	19	21	20	20	O00429-2;O00429-4;O00429-8;O00429-5	O00429-2;O00429-4;O00429-8;O00429-5	Dynamin-1-like protein	DNM1L
0.96069	0.9049	1.0241	0.93019	0.73627	1.2283	0.74575	1.0008	0.73556	0.77094	0.77395	0.74054	0.64816	0.62914				13	13	13	42.9	42.9	42.9	39.336	0	41342000000	21528000000	19814000000	9	8	6	9	9	9	8	7	7	6	6	6	7	5	O00442;O00442-2	O00442;O00442-2	RNA 3-terminal phosphate cyclase	RTCA
NaN	NaN	0.9743	0.66419	NaN	NaN	NaN	0.93225	0.54257	NaN	NaN	NaN	NaN	NaN				9	9	9	7.1	7.1	7.1	190.68	0	491980000	304350000	187620000	0	2	2	2	1	2	2	2	4	0	1	1	1	1	O00443;O00443-2	O00443	Phosphatidylinositol 4-phosphate 3-kinase C2 domain-containing subunit alpha	PIK3C2A
NaN	NaN	NaN	NaN	NaN	NaN	NaN	NaN	NaN	NaN	NaN	NaN	NaN	NaN				3	3	3	10.6	10.6	10.6	50.268	0	293230000	76798000	216430000	1	0	0	0	1	0	0	0	0	0	0	1	0	1	O00458;O00458-2	O00458;O00458-2	Interferon-related developmental regulator 1	IFRD1
NaN	NaN	NaN	NaN	NaN	NaN	NaN	NaN	NaN	NaN	NaN	NaN	NaN	NaN				1	1	1	2.6	2.6	2.6	81.544	0.0030211	180680000	67865000	112820000	0	0	0	0	0	0	0	1	1	0	0	0	0	0	O00459	O00459	Phosphatidylinositol 3-kinase regulatory subunit beta	PIK3R2
NaN	NaN	0.66949	1.06	0.7547	1.3511	0.48123	1.251	0.95561	0.84263	0.78448	0.86928	0.76823	0.83954				7	7	7	11.9	11.9	11.9	81.879	0	6369600000	3368800000	3000800000	2	5	3	2	4	5	4	2	3	3	4	3	3	3	O00461	O00461	Golgi integral membrane protein 4	GOLIM4
NaN	NaN	NaN	NaN	NaN	NaN	NaN	NaN	0.45172	1.3883	0.78009	NaN	NaN	NaN				4	4	4	2.7	2.7	2.7	214.84	0.00040225	1879700000	1220500000	659220000	1	1	1	1	0	0	1	1	2	3	2	0	1	2	O00468-6;O00468-3;O00468-7;O00468;O00468-2;O00468-5;O00468-4	O00468-6;O00468-3;O00468-7;O00468;O00468-2;O00468-5;O00468-4	Agrin;Agrin N-terminal 110 kDa subunit;Agrin C-terminal 110 kDa subunit;Agrin C-terminal 90 kDa fragment;Agrin C-terminal 22 kDa fragment	AGRN
1.0461	0.96959	0.95411	0.89886	0.70106	1.3744	0.61655	1.0014	0.67749	0.79847	0.82359	0.81554	0.73307	0.73239				20	20	20	30.7	30.7	30.7	87.097	0	54612000000	29025000000	25587000000	15	15	14	15	15	16	15	11	11	14	13	14	9	11	O00469-2;O00469;O00469-3	O00469-2;O00469;O00469-3	Procollagen-lysine,2-oxoglutarate 5-dioxygenase 2	PLOD2
NaN	NaN	NaN	NaN	NaN	NaN	NaN	0.97403	NaN	NaN	NaN	0.76947	0.76273	NaN				9	9	9	15.5	15.5	15.5	81.852	0	2011400000	1131100000	880300000	2	0	2	2	0	0	0	2	3	2	1	2	4	3	O00471	O00471	Exocyst complex component 5	EXOC5
1.1041	0.96604	0.80781	0.45231	0.732	1.3359	0.55315	1.1616	0.67781	0.9266	0.81266	0.7659	0.72124	0.70943				7	7	7	59.3	59.3	59.3	9.3697	0	73143000000	40079000000	33065000000	4	5	5	6	5	6	5	4	4	5	4	4	4	4	O00483	O00483	NADH dehydrogenase [ubiquinone] 1 alpha subcomplex subunit 4	NDUFA4
0.99797	0.94472	0.98513	0.96164	0.75752	1.3851	0.52676	1.0247	0.68201	0.80896	0.75449	0.76361	0.74632	0.66746				7	7	7	24.8	24.8	24.8	34.577	0	116540000000	63540000000	52997000000	7	7	7	7	7	7	7	7	7	7	7	7	7	7	O00487	O00487	26S proteasome non-ATPase regulatory subunit 14	PSMD14
NaN	NaN	NaN	0.88681	NaN	NaN	NaN	NaN	NaN	NaN	NaN	NaN	NaN	NaN				3	3	3	26.1	26.1	26.1	15.199	0	2774900000	1451600000	1323400000	1	1	1	3	2	1	2	0	0	0	0	0	0	0	O00488	O00488	Zinc finger protein 593	ZNF593
1.0466	0.92869	0.93184	0.99782	0.75731	1.4104	0.6908	1.1342	0.79275	0.98001	0.93462	0.96518	0.72058	0.69518				13	13	13	27.5	27.5	27.5	64.699	0	50146000000	26197000000	23949000000	8	9	8	9	7	7	7	9	8	6	4	7	6	6	O00499;O00499-2;O00499-6;O00499-11;O00499-10;O00499-9;O00499-7;O00499-8;O00499-4;O00499-3;O00499-5	O00499;O00499-2;O00499-6;O00499-11;O00499-10;O00499-9;O00499-7;O00499-8;O00499-4;O00499-3;O00499-5	Myc box-dependent-interacting protein 1	BIN1
NaN	NaN	NaN	NaN	NaN	NaN	NaN	NaN	0.66787	0.61982	NaN	0.78606	NaN	0.48766				10	5	5	18.2	9.2	9.2	57.81	0	8000600000	2831600000	5169000000	4	5	5	5	5	4	4	6	6	6	7	6	7	6	O00505	O00505	Importin subunit alpha-4	KPNA3
0.97938	0.86466	1.0014	0.86842	0.78245	1.2326	0.8536	1.0588	0.77115	0.90773	0.92199	0.97441	0.8155	0.82483				16	16	16	29.3	29.3	29.3	68.002	0	72740000000	40265000000	32475000000	10	11	10	12	11	9	12	10	10	10	10	10	10	10	O00541;O00541-2	O00541;O00541-2	Pescadillo homolog	PES1
NaN	NaN	NaN	NaN	NaN	NaN	NaN	NaN	NaN	NaN	NaN	NaN	NaN	NaN				1	1	1	8.9	8.9	8.9	24.377	0	165720000	93135000	72584000	0	1	1	1	1	1	1	0	0	0	1	1	0	0	O00559;O00559-2	O00559;O00559-2	Receptor-binding cancer antigen expressed on SiSo cells	EBAG9
1.0659	0.82869	0.90714	NaN	0.79115	1.2937	0.52661	1.1265	0.70789	0.80825	0.82156	0.88541	0.9855	0.79166				8	8	8	48	48	48	32.444	0	17451000000	9748800000	7702100000	4	4	3	1	2	3	3	5	4	3	2	3	4	3	O00560;O00560-2;O00560-3	O00560;O00560-2;O00560-3	Syntenin-1	SDCBP
0.91107	0.97565	0.7481	0.89569	0.65944	1.0792	0.54886	0.72096	NaN	1.0099	0.72334	0.80454	0.94057	0.8655				8	8	8	18.9	18.9	18.9	78.863	0	11627000000	6713200000	4913400000	6	6	5	6	6	3	7	5	3	5	3	5	3	4	O00566	O00566	U3 small nucleolar ribonucleoprotein protein MPP10	MPHOSPH10
1.0045	1.0136	1.0007	0.82559	0.76213	1.3816	0.58752	0.97512	0.7174	0.87439	0.91068	0.9758	0.85555	0.82159				26	26	26	51.9	51.9	51.9	66.049	0	463520000000	236190000000	227330000000	21	23	23	22	20	22	23	21	22	21	22	22	21	20	O00567	O00567	Nucleolar protein 56	NOP56
0.9934	0.96586	0.91413	0.89293	0.7197	1.2329	0.55928	1.0168	0.72985	0.84043	0.83339	0.90655	0.76153	0.77001				42	41	41	66	66	66	73.243	0	705630000000	382500000000	323130000000	28	31	31	32	35	28	31	32	30	30	29	30	28	29	O00571;O00571-2;O15523;O15523-2;O15523-3;Q9NQI0;Q9NQI0-3;Q9NQI0-2;Q9NQI0-4	O00571;O00571-2;O15523;O15523-2	ATP-dependent RNA helicase DDX3X;ATP-dependent RNA helicase DDX3Y	DDX3X;DDX3Y
NaN	NaN	NaN	NaN	NaN	NaN	NaN	NaN	NaN	NaN	NaN	NaN	NaN	NaN				3	3	3	15.2	15.2	15.2	29.48	0.0076782	371120000	220370000	150760000	0	1	1	2	1	0	1	1	0	0	0	0	0	1	O00584;O00584-2	O00584	Ribonuclease T2	RNASET2
1.0953	0.96073	0.96102	0.88657	0.78017	1.3893	0.55381	1.0926	0.6661	0.83383	0.8507	0.83628	0.71836	0.72225				8	8	8	17	17	17	58.635	0	117500000000	61441000000	56057000000	5	6	3	4	4	5	4	4	4	4	4	4	3	3	O00592;O00592-2	O00592;O00592-2	Podocalyxin	PODXL
0.95069	0.79304	0.85453	0.76622	0.62217	1.0929	0.43783	1.0762	0.74301	0.94852	0.86543	0.88707	0.86001	0.86137				21	21	21	65.6	65.6	65.6	42.026	0	142670000000	81399000000	61267000000	18	17	15	18	16	17	18	13	12	13	14	15	14	14	O00622	O00622	Protein CYR61	CYR61
1.0437	0.98611	1.039	1.0125	0.84212	1.3445	0.59791	0.99425	0.71722	1.2558	0.75901	0.92878	0.87991	0.85428				11	11	11	48.3	48.3	48.3	32.113	0	39243000000	20974000000	18270000000	6	8	8	8	9	8	6	6	6	7	6	6	6	6	O00625	O00625	Pirin	PIR
1.1377	1.0171	1.0325	0.97402	0.86649	1.6418	0.53524	1.1099	0.87488	0.97508	0.8174	0.8945	0.93877	0.83163				12	12	7	33	33	24	57.886	0	37139000000	18612000000	18527000000	5	8	8	7	8	8	7	7	5	5	6	5	6	6	O00629	O00629	Importin subunit alpha-3	KPNA4
NaN	NaN	NaN	NaN	NaN	NaN	NaN	NaN	NaN	NaN	NaN	NaN	NaN	NaN				5	3	3	18.6	13.6	13.6	47.441	0	566620000	90730000	475890000	1	2	2	2	3	1	1	2	1	3	3	3	3	2	O00712;O00712-4;O00712-5;O00712-2;O00712-6	O00712;O00712-4;O00712-5	Nuclear factor 1 B-type	NFIB
0.85818	0.93691	0.82497	0.82306	0.66998	NaN	0.50888	0.94656	0.54928	0.92538	1.1079	0.73462	NaN	0.70103				9	9	9	33.8	33.8	33.8	35.144	0	12498000000	6870000000	5627700000	3	4	4	3	4	2	4	3	3	3	4	4	2	3	O00743;O00743-3;O00743-2	O00743;O00743-3;O00743-2	Serine/threonine-protein phosphatase 6 catalytic subunit	PPP6C
NaN	NaN	NaN	NaN	0.93255	NaN	NaN	NaN	0.59803	0.69078	NaN	0.63451	NaN	0.64431				5	5	5	32.6	32.6	32.6	20.658	0	3552000000	1956600000	1595400000	1	2	2	1	2	1	1	2	2	3	1	2	1	2	O00746;O00746-2	O00746;O00746-2	Nucleoside diphosphate kinase, mitochondrial	NME4
NaN	NaN	NaN	NaN	NaN	NaN	0.54955	NaN	NaN	NaN	NaN	NaN	NaN	NaN				12	12	12	9.5	9.5	9.5	184.77	0	3402300000	1786800000	1615500000	1	2	4	2	3	1	4	1	1	4	1	1	2	1	O00750	O00750	Phosphatidylinositol 4-phosphate 3-kinase C2 domain-containing subunit beta	PIK3C2B
NaN	NaN	NaN	NaN	NaN	NaN	0.48526	NaN	NaN	NaN	0.68262	0.69027	0.6781	NaN				7	7	7	9.4	9.4	9.4	113.74	0	5065500000	2927400000	2138000000	2	3	2	2	1	1	3	2	1	1	2	4	2	3	O00754;O00754-2	O00754;O00754-2	Lysosomal alpha-mannosidase;Lysosomal alpha-mannosidase A peptide;Lysosomal alpha-mannosidase B peptide;Lysosomal alpha-mannosidase C peptide;Lysosomal alpha-mannosidase D peptide;Lysosomal alpha-mannosidase E peptide	MAN2B1
0.98464	1.0313	0.96513	0.9952	0.8531	1.116	0.61084	0.89891	NaN	0.99976	0.77662	0.77773	0.61192	0.73388				8	8	8	60.9	60.9	60.9	19.652	0	18610000000	9491800000	9118600000	6	5	5	7	4	5	6	4	4	4	4	5	4	5	O00762;O00762-2;O00762-3;O00762-4	O00762;O00762-2;O00762-3;O00762-4	Ubiquitin-conjugating enzyme E2 C	UBE2C
0.95781	1.028	1.0226	0.94657	0.77875	1.4314	0.6321	0.92946	0.76407	0.82771	0.86336	0.90371	0.80939	0.75593				14	14	14	47.1	47.1	47.1	35.102	0	200120000000	102210000000	97904000000	8	9	11	9	10	9	10	8	10	9	10	11	9	9	O00764;O00764-3;O00764-2	O00764;O00764-3;O00764-2	Pyridoxal kinase	PDXK
0.98119	0.93191	0.83134	0.70181	0.68041	1.2737	0.47625	0.95146	0.70371	0.77702	0.80862	0.72828	0.77784	0.76346				4	4	4	10.9	10.9	10.9	41.522	0	27872000000	14564000000	13308000000	4	4	3	4	4	4	4	3	2	3	3	2	3	3	O00767	O00767	Acyl-CoA desaturase	SCD
NaN	NaN	0.78534	NaN	NaN	NaN	0.59682	NaN	NaN	NaN	NaN	NaN	0.80913	NaN				7	7	6	5.6	5.6	4.8	242.04	0	5625800000	2898900000	2727000000	1	1	1	1	2	1	1	2	1	2	1	3	1	1	O14497;O14497-2;O14497-3	O14497;O14497-2;O14497-3	AT-rich interactive domain-containing protein 1A	ARID1A
NaN	NaN	NaN	NaN	NaN	NaN	NaN	NaN	NaN	NaN	NaN	NaN	NaN	NaN				2	2	1	31.3	31.3	22.6	12.365	0	620100000	137040000	483060000	1	2	1	1	1	0	1	0	0	0	0	0	0	0	O14519;O14519-2	O14519;O14519-2	Cyclin-dependent kinase 2-associated protein 1	CDK2AP1
0.93381	0.88388	0.85757	0.87741	0.73025	1.2198	0.48648	0.9379	0.67637	0.73449	0.75409	0.83613	0.71008	0.71081				13	13	13	54.9	54.9	54.9	26.534	0	45847000000	26512000000	19336000000	8	9	10	10	8	9	8	5	6	6	5	8	7	6	O14530;O14530-2	O14530;O14530-2	Thioredoxin domain-containing protein 9	TXNDC9
1.0512	1.1878	1.1023	1.3267	1.2406	2.6547	1.6019	0.96882	3.7521	NaN	NaN	5.7572	4.2306	4.7845				11	11	11	22.3	22.3	22.3	64.84	0	7512500000	2551100000	4961400000	5	5	7	5	5	4	7	1	2	2	2	2	3	3	O14545;O14545-2	O14545	TRAF-type zinc finger domain-containing protein 1	TRAFD1
0.95922	0.91644	0.81509	0.82728	0.70239	NaN	0.62442	NaN	NaN	1.2242	NaN	NaN	1.217	1.0895				5	5	5	48.2	48.2	48.2	12.615	0	12215000000	5924600000	6290200000	4	4	3	5	3	2	3	2	2	2	3	2	2	2	O14548	O14548	Cytochrome c oxidase subunit 7A-related protein, mitochondrial	COX7A2L
1.1774	0.86738	0.65787	0.88463	0.74581	1.1977	0.5474	1.1863	0.75505	0.88754	0.86876	0.97745	0.80411	0.69955				3	3	3	15.4	15.4	15.4	17.417	0	113780000000	61767000000	52008000000	2	3	2	2	2	2	2	2	2	2	2	2	2	2	O14561	O14561	Acyl carrier protein, mitochondrial	NDUFAB1
1.0732	0.89155	0.90643	0.89318	0.66389	1.1525	0.51592	0.97287	0.76478	1.0876	0.7258	0.90732	0.95514	0.86091				8	8	8	28.5	28.5	28.5	33.382	0	25720000000	13489000000	12231000000	7	4	5	6	6	5	4	5	3	4	5	6	3	6	O14562	O14562	Ubiquitin domain-containing protein UBFD1	UBFD1
NaN	NaN	NaN	NaN	NaN	NaN	NaN	NaN	NaN	NaN	NaN	NaN	NaN	NaN				1	1	1	5.3	5.3	5.3	72.955	0.00059642	253640000	0	253640000	0	0	0	1	1	0	0	0	0	0	0	0	0	0	O14576;O14576-4;O14576-3;O14576-5;O14576-2	O14576;O14576-4;O14576-3;O14576-5;O14576-2	Cytoplasmic dynein 1 intermediate chain 1	DYNC1I1
1.0532	0.95918	0.88533	0.76081	0.71182	1.2074	NaN	1.0747	NaN	0.72086	0.79767	0.90471	0.7766	0.69511				14	14	14	7.7	7.7	7.7	236.6	0	3754000000	2064700000	1689300000	4	5	5	5	6	5	4	5	5	5	5	6	5	5	O14578-4;O14578;O14578-3;O14578-2	O14578-4;O14578;O14578-3	Citron Rho-interacting kinase	CIT
1.0125	0.84706	0.936	0.90587	0.6722	1.2523	0.5771	1.0132	0.71444	0.95911	0.82645	0.84681	0.75145	0.87391				18	18	18	56.5	56.5	56.5	34.482	0	105700000000	57832000000	47873000000	11	10	11	14	14	12	12	10	10	10	10	10	10	9	O14579;O14579-3;O14579-2	O14579;O14579-3;O14579-2	Coatomer subunit epsilon	COPE
1.0179	0.86059	1.0172	0.87652	0.67876	1.3566	0.57671	0.92354	0.61593	0.74855	0.76525	0.72805	0.71901	0.67328				23	23	23	20.2	20.2	20.2	130.16	0	62666000000	37159000000	25507000000	16	16	16	15	15	16	14	14	14	13	14	13	12	12	O14617;O14617-5;O14617-4;O14617-2;O14617-3	O14617;O14617-5;O14617-4;O14617-2;O14617-3	AP-3 complex subunit delta-1	AP3D1
0.99934	0.93804	0.98346	1.1266	0.69187	1.3028	0.63341	0.93929	NaN	NaN	NaN	NaN	0.85813	0.85317				6	6	6	21.2	21.2	21.2	29.04	0	7464500000	4224700000	3239800000	4	5	5	6	5	5	4	2	2	3	3	3	3	2	O14618	O14618	Copper chaperone for superoxide dismutase	CCS
NaN	NaN	NaN	NaN	NaN	NaN	NaN	NaN	NaN	0.27887	NaN	NaN	NaN	NaN				6	6	6	11.1	11.1	11.1	87.687	0	2446700000	1701200000	745440000	2	2	1	1	2	3	1	1	1	3	0	1	0	0	O14639;O14639-5;O14639-4;O14639-3;O14639-2;O14639-6	O14639;O14639-5;O14639-4;O14639-3;O14639-2;O14639-6	Actin-binding LIM protein 1	ABLIM1
NaN	NaN	NaN	NaN	NaN	NaN	NaN	NaN	NaN	NaN	NaN	NaN	NaN	NaN				5	5	5	9.5	9.5	9.5	78.947	0	633320000	343490000	289840000	1	1	2	1	1	1	1	1	0	0	0	0	0	1	O14641	O14641	Segment polarity protein dishevelled homolog DVL-2	DVL2
0.97604	0.96336	0.93172	0.97308	0.74305	1.4126	0.68551	1.0616	0.73004	0.84381	0.81686	0.83258	0.91159	0.78221				29	29	25	21.6	21.6	19.2	196.69	0	26592000000	14104000000	12488000000	13	13	14	16	14	12	15	13	13	11	10	10	9	11	O14646;O14646-2	O14646;O14646-2	Chromodomain-helicase-DNA-binding protein 1	CHD1
NaN	NaN	NaN	NaN	NaN	NaN	NaN	NaN	NaN	NaN	NaN	NaN	NaN	NaN				4	4	4	24.5	24.5	24.5	24.775	0	3035500000	1345400000	1690100000	1	2	1	1	0	1	2	2	1	0	0	2	1	1	O14653;O14653-3;O14653-2	O14653;O14653-3;O14653-2	Golgi SNAP receptor complex member 2	GOSR2
1.0049	0.87207	0.91243	1.1	0.72835	1.1522	0.48003	1.1247	0.56196	1.0697	0.8397	0.92375	0.73128	0.76041				8	8	8	26.8	26.8	26.8	37.808	0	4737800000	2490500000	2247300000	5	4	3	6	2	3	2	5	5	4	3	4	4	4	O14656;O14656-2	O14656	Torsin-1A	TOR1A
NaN	0.98847	NaN	NaN	NaN	NaN	NaN	NaN	NaN	NaN	NaN	NaN	0.6389	0.68542				4	4	4	15.2	15.2	15.2	37.978	0	1615400000	927180000	688250000	1	2	1	1	2	0	1	1	1	2	0	1	2	2	O14657	O14657	Torsin-1B	TOR1B
NaN	NaN	NaN	NaN	NaN	NaN	NaN	NaN	NaN	NaN	NaN	NaN	NaN	0.97617				3	3	3	11.1	11.1	11.1	37.031	0.00078079	473620000	237250000	236370000	0	0	0	0	1	0	1	2	1	1	1	1	1	2	O14662;O14662-5;O14662-6;O14662-2;O14662-4;O14662-3	O14662;O14662-5;O14662-6;O14662-2;O14662-4	Syntaxin-16	STX16
NaN	NaN	NaN	0.87671	0.72059	1.612	0.63303	0.94025	0.85074	1.0542	0.79235	1.0064	0.72739	1.2434				13	13	13	21.7	21.7	21.7	84.141	0	3053800000	1408300000	1645500000	1	1	2	3	4	3	3	6	4	3	3	4	5	4	O14672;O14672-2	O14672;O14672-2	Disintegrin and metalloproteinase domain-containing protein 10	ADAM10
NaN	NaN	NaN	NaN	NaN	NaN	NaN	NaN	NaN	NaN	NaN	NaN	NaN	NaN				2	2	2	7.9	7.9	7.9	38.964	0	171920000	70885000	101030000	1	1	1	0	1	1	1	0	1	0	0	0	0	0	O14681;O14681-3	O14681;O14681-3	Etoposide-induced protein 2.4 homolog	EI24
NaN	NaN	NaN	NaN	NaN	NaN	NaN	NaN	NaN	NaN	NaN	NaN	NaN	NaN				1	1	1	6.6	6.6	6.6	17.102	0.0087448	361760000	178920000	182840000	0	0	0	0	0	0	0	1	0	0	1	0	0	0	O14684	O14684	Prostaglandin E synthase	PTGES
0.99406	0.83685	0.94538	0.8645	0.73459	1.3316	0.54056	0.98078	0.70573	0.79233	0.75928	0.75064	0.69215	0.70952				7	7	7	29.2	29.2	29.2	31.321	0	35966000000	20029000000	15936000000	2	2	4	4	2	2	2	3	5	5	5	3	3	4	O14732;O14732-2	O14732;O14732-2	Inositol monophosphatase 2	IMPA2
0.91825	0.95304	0.95088	0.9064	0.6575	1.3597	0.64389	1.0362	0.69784	0.84276	0.88011	0.80785	0.84364	0.7483				12	12	12	68	68	68	14.285	0	116760000000	68306000000	48455000000	8	8	7	7	7	5	9	8	9	10	9	9	7	8	O14737;O14737-2	O14737;O14737-2	Programmed cell death protein 5	PDCD5
1.0041	0.97218	1.0775	0.99481	0.78598	1.4166	0.65626	1.0221	0.71272	0.83882	0.76162	0.80539	0.74214	0.72088				25	25	25	40.7	40.7	40.7	72.683	0	178560000000	92261000000	86300000000	18	18	20	18	17	21	16	21	21	21	19	19	20	20	O14744;O14744-5;O14744-2;O14744-3;O14744-4	O14744;O14744-5;O14744-2;O14744-3;O14744-4	Protein arginine N-methyltransferase 5;Protein arginine N-methyltransferase 5, N-terminally processed	PRMT5
1.0165	0.95812	1.0191	1.0361	0.83642	1.4246	0.66702	1.0294	0.75938	0.85925	0.81683	0.82303	0.81782	0.83405				23	23	23	66.2	66.2	66.2	38.868	0	241830000000	124080000000	117750000000	17	19	19	18	20	17	19	16	14	14	14	15	12	14	O14745;O14745-2	O14745;O14745-2	Na(+)/H(+) exchange regulatory cofactor NHE-RF1	SLC9A3R1
NaN	NaN	NaN	NaN	NaN	NaN	NaN	NaN	NaN	NaN	NaN	NaN	NaN	NaN				4	4	4	11.6	11.6	11.6	66.598	0	193180000	165290000	27891000	0	0	2	0	1	0	1	1	2	0	1	1	0	0	O14772;O14772-2;O14772-3;Q59H18-3;Q59H18-4;Q59H18-1	O14772;O14772-2	Fucose-1-phosphate guanylyltransferase	FPGT
0.87893	0.88406	0.92246	0.89024	0.62213	1.0644	0.52326	1.0138	0.72012	0.87782	0.80989	0.87091	0.82708	0.83014				5	5	5	11.9	11.9	11.9	61.247	0	64219000000	35358000000	28861000000	2	4	3	4	4	3	3	4	4	3	4	3	3	4	O14773;O14773-2	O14773;O14773-2	Tripeptidyl-peptidase 1	TPP1
0.97201	0.88144	0.8958	0.93072	0.69889	1.3432	0.54841	0.99124	0.75738	0.83394	0.82613	0.96187	0.76381	0.77582				38	38	38	34.5	34.5	34.5	123.9	0	128280000000	68450000000	59830000000	21	30	26	27	26	26	27	19	21	20	19	18	16	15	O14776;O14776-2;Q5VWI1	O14776;O14776-2	Transcription elongation regulator 1	TCERG1
0.97236	0.90127	0.81305	0.85446	0.61727	1.0877	0.43047	1.0603	0.6531	0.82801	0.85646	0.69403	0.69204	0.67599				19	19	19	36.6	36.6	36.6	73.912	0	19705000000	10901000000	8803700000	8	9	10	12	9	8	9	11	9	7	7	5	8	9	O14777	O14777	Kinetochore protein NDC80 homolog	NDC80
0.984	1.024	0.97823	1.0459	0.76631	1.4363	0.67505	0.99442	0.6603	0.70751	0.82479	0.73734	0.75827	0.67369				16	9	9	23.7	17.2	17.2	100.41	0	20644000000	11252000000	9392200000	11	13	11	11	12	11	12	10	9	10	11	11	11	11	O14787-2;O14787	O14787-2;O14787	Transportin-2	TNPO2
NaN	NaN	NaN	NaN	NaN	NaN	NaN	NaN	NaN	0.87987	0.71662	NaN	1.137	NaN				8	8	8	7.3	7.3	7.3	155.64	0	1705900000	974950000	730920000	2	1	1	1	1	1	1	3	0	2	2	1	2	1	O14802	O14802	DNA-directed RNA polymerase III subunit RPC1	POLR3A
0.99698	1.0212	1.0685	0.97632	0.77319	1.4588	0.65634	0.97792	0.6899	0.82765	0.80688	0.82783	0.79347	0.69097				16	16	16	60.5	60.5	60.5	27.887	0	558300000000	295830000000	262470000000	16	14	13	14	14	14	13	14	14	14	14	13	14	14	O14818;O14818-2;O14818-4;Q8TAA3;Q8TAA3-2;Q8TAA3-5	O14818;O14818-2	Proteasome subunit alpha type-7	PSMA7
1.0037	0.92669	1.1037	0.91737	0.74204	1.3262	0.55861	1.0614	0.77778	0.83554	0.95206	0.97917	0.80737	0.75228				11	11	11	39.8	39.8	39.8	38.287	0	87541000000	48440000000	39101000000	6	8	8	8	8	8	10	10	8	8	8	8	8	8	O14828;O14828-2	O14828;O14828-2	Secretory carrier-associated membrane protein 3	SCAMP3
NaN	NaN	1.2153	NaN	NaN	NaN	NaN	1.1171	0.79289	NaN	NaN	0.87402	1.3443	0.82258				4	4	4	4.7	4.7	4.7	137.46	0.0017179	1532400000	717720000	814630000	1	1	2	1	1	0	0	3	2	2	1	2	2	3	O14841	O14841	5-oxoprolinase	OPLAH
NaN	NaN	1.8262	NaN	1.4317	NaN	NaN	NaN	NaN	NaN	NaN	NaN	NaN	0.96561				4	4	4	12.1	12.1	12.1	46.36	0	2250500000	943080000	1307400000	2	1	3	2	3	2	2	1	0	1	0	1	1	3	O14874;O14874-2;O14874-3	O14874;O14874-2;O14874-3	[3-methyl-2-oxobutanoate dehydrogenase [lipoamide]] kinase, mitochondrial	BCKDK
NaN	NaN	NaN	NaN	NaN	NaN	NaN	NaN	NaN	NaN	NaN	NaN	NaN	NaN				3	3	3	9.6	9.6	9.6	55.984	0	440140000	419470000	20670000	0	0	1	1	0	0	0	2	1	1	1	1	2	1	O14879	O14879	Interferon-induced protein with tetratricopeptide repeats 3	IFIT3
NaN	1.3067	NaN	0.99224	NaN	NaN	NaN	1.137	0.74226	0.8708	0.93751	1.4312	1.1297	0.93044				4	4	4	33.6	33.6	33.6	16.516	0	37332000000	20000000000	17332000000	2	1	2	2	2	1	2	3	3	4	3	3	4	3	O14880	O14880	Microsomal glutathione S-transferase 3	MGST3
NaN	0.96415	1.0181	NaN	0.7368	NaN	0.729	NaN	NaN	NaN	NaN	NaN	NaN	NaN				3	3	3	11.4	11.4	11.4	31.585	0	4137500000	2152800000	1984700000	2	2	2	1	2	2	2	1	2	1	1	1	2	0	O14893;O14893-3;O14893-2	O14893;O14893-3;O14893-2	Gem-associated protein 2	GEMIN2
NaN	0.94237	0.75796	NaN	NaN	1.1882	0.65573	1.0495	0.66056	0.85205	0.75077	0.74677	0.68312	0.71829				7	7	7	55.6	55.6	55.6	13.735	0	10175000000	5699500000	4475600000	2	2	2	2	3	2	5	3	5	3	4	4	2	4	O14907	O14907	Tax1-binding protein 3	TAX1BP3
1.4251	0.68819	0.96561	0.98483	0.68014	1.0312	NaN	0.90413	0.81138	0.90493	1.0242	1.408	0.7758	0.82767				8	8	8	30.6	30.6	30.6	36.049	0	11202000000	5647200000	5555100000	4	3	6	4	4	4	4	4	4	6	5	5	6	5	O14908;O14908-2;Q8TF64	O14908;O14908-2	PDZ domain-containing protein GIPC1	GIPC1
NaN	NaN	NaN	NaN	NaN	NaN	NaN	NaN	NaN	NaN	NaN	NaN	NaN	NaN				4	1	1	18	3.9	3.9	25.996	0.0022783	4564500000	2285000000	2279600000	3	3	2	4	3	2	4	1	2	2	1	3	2	3	O14910	O14910	Protein lin-7 homolog A	LIN7A
NaN	NaN	NaN	NaN	NaN	NaN	NaN	0.99938	0.92998	0.83214	0.8378	0.99482	2.4559	1.0432				9	9	8	14.8	14.8	13.8	86.563	0	1762300000	935780000	826500000	2	3	2	3	2	2	0	5	5	4	3	3	3	4	O14920;O14920-2;O14920-4;O14920-3	O14920;O14920-2;O14920-4	Inhibitor of nuclear factor kappa-B kinase subunit beta	IKBKB
1.1922	NaN	NaN	NaN	0.84579	1.2609	0.89406	0.98777	0.65059	NaN	0.80114	0.74967	0.74034	0.75989				5	5	5	27.3	27.3	27.3	21.943	0	10943000000	5822500000	5120300000	4	2	3	2	4	2	5	4	3	2	3	2	5	2	O14925;Q5SRD1	O14925;Q5SRD1	Mitochondrial import inner membrane translocase subunit Tim23;Putative mitochondrial import inner membrane translocase subunit Tim23B	TIMM23;TIMM23B
1.0417	1.0251	1.09	1.0302	0.77008	1.474	0.63648	1.0615	0.7858	0.84527	0.84992	0.89143	0.8253	0.75229				14	14	14	39.9	39.9	39.9	49.512	0	210280000000	106670000000	103610000000	12	13	12	12	13	12	12	12	11	11	12	11	10	11	O14929;O14929-2	O14929;O14929-2	Histone acetyltransferase type B catalytic subunit	HAT1
NaN	NaN	NaN	NaN	NaN	NaN	NaN	NaN	NaN	NaN	NaN	0.81092	NaN	NaN				8	8	8	10.4	10.4	10.4	105.12	0.00059055	560720000	293540000	267170000	0	0	1	1	0	1	1	0	0	1	1	2	2	1	O14936;O14936-3;O14936-4;O14936-2;O14936-6;O14936-5	O14936;O14936-3;O14936-4;O14936-2;O14936-6	Peripheral plasma membrane protein CASK	CASK
1.0098	0.8996	0.83184	0.73015	0.68709	1.0385	0.56653	0.98647	0.60504	0.75583	0.73336	0.65836	0.72274	0.63297				4	4	4	47.6	47.6	47.6	9.9062	0	33473000000	18560000000	14913000000	3	3	3	3	3	2	3	3	3	4	4	3	3	3	O14949	O14949	Cytochrome b-c1 complex subunit 8	UQCRQ
1.0762	1.0379	1.1826	1.074	0.82618	1.551	0.7232	1.0569	0.73809	0.88229	0.84465	1.0778	0.9556	0.85938				16	16	16	68	68	68	19.779	0	351750000000	183930000000	167820000000	13	12	11	11	12	10	11	12	13	12	12	12	12	11	O14950;P19105;P24844;P24844-2	O14950;P19105;P24844	Myosin regulatory light chain 12B;Myosin regulatory light chain 12A;Myosin regulatory light polypeptide 9	MYL12B;MYL12A;MYL9
1.0223	0.92852	0.98505	0.99642	0.66474	1.3169	0.58315	1.062	0.82454	0.86422	0.64833	0.79355	0.73763	0.73684				16	16	16	22.5	22.5	22.5	86.191	0	40597000000	21978000000	18618000000	7	9	7	8	8	8	10	8	6	6	7	6	4	9	O14964;O14964-2	O14964;O14964-2	Hepatocyte growth factor-regulated tyrosine kinase substrate	HGS
1.0332	0.88127	0.71459	0.36184	0.26816	0.43368	0.18623	1.0281	0.74776	0.68052	0.46285	0.42304	0.309	0.24298				23	23	21	61.8	61.8	59.3	45.809	0	126130000000	86677000000	39456000000	15	12	13	17	14	12	13	17	12	14	10	14	12	11	O14965	O14965	Aurora kinase A	AURKA
NaN	NaN	0.9481	0.8135	NaN	1.5205	0.58563	1.1352	0.69244	NaN	0.94699	0.85133	NaN	0.64953				5	4	4	34.5	29.1	29.1	23.155	0	6734700000	3354200000	3380500000	1	1	2	2	1	2	2	4	4	3	3	2	3	3	O14966;O14966-2;O14966-3	O14966;O14966-2	Ras-related protein Rab-7L1	RAB7L1
1.0213	0.85251	0.91604	0.91232	0.70784	1.2456	0.57988	1.0206	0.75294	0.79572	0.78027	0.83364	0.77466	0.75939				32	32	32	36.1	36.1	36.1	115.28	0	110150000000	59748000000	50406000000	21	22	22	21	24	21	23	19	20	18	16	19	16	21	O14974;O14974-2;O14974-5;O14974-4;O14974-3	O14974;O14974-2;O14974-5;O14974-4;O14974-3	Protein phosphatase 1 regulatory subunit 12A	PPP1R12A
0.928	1.0457	0.99299	0.71678	0.63261	1.3995	0.50567	1.0775	0.75254	0.98168	1.0766	0.89447	0.75474	0.88186				15	15	15	31.8	31.8	31.8	70.311	0	27539000000	14524000000	13015000000	7	8	8	8	6	8	6	9	9	8	9	8	10	8	O14975;O14975-2	O14975;O14975-2	Very long-chain acyl-CoA synthetase	SLC27A2
0.92354	1.3412	1.0446	0.85793	0.72546	1.5506	0.51887	0.85705	0.83749	0.63466	0.93206	0.76265	1.2106	0.76914				13	13	13	13.8	13.8	13.8	143.19	0	32598000000	17273000000	15325000000	4	4	6	4	6	6	4	5	6	4	6	5	4	6	O14976;O14976-2	O14976;O14976-2	Cyclin-G-associated kinase	GAK
NaN	0.91938	NaN	NaN	NaN	NaN	NaN	NaN	NaN	NaN	NaN	NaN	NaN	NaN	+			13	1	1	26	1.9	1.9	46.437	1	2129100000	1202900000	926230000	10	9	9	10	8	10	8	8	9	10	9	10	9	9	O14979	O14979	Heterogeneous nuclear ribonucleoprotein D-like	HNRPDL
0.94961	0.96686	0.98202	1.0142	0.7207	1.3778	0.58198	0.96976	0.71338	0.86672	0.82348	0.84288	0.74646	0.7226				13	11	1	48.8	48.8	7.4	27.191	0	346650000000	186470000000	160170000000	10	9	8	10	9	10	8	9	9	10	9	9	9	9	O14979-3;O14979-2	O14979-3;O14979-2	Heterogeneous nuclear ribonucleoprotein D-like	HNRPDL
0.97771	0.97238	0.99943	0.97906	0.73566	1.3537	0.76819	1.0168	0.72737	0.83601	0.80901	1.0037	0.85771	0.75789				39	39	39	39.9	39.9	39.9	123.38	0	423830000000	225430000000	198400000000	30	34	32	33	34	32	32	25	28	25	24	27	28	27	O14980	O14980	Exportin-1	XPO1
0.85068	0.80671	1.046	0.8455	0.73731	1.4056	0.46093	0.95898	0.677	0.82464	0.74753	0.90716	0.77845	0.687				25	25	25	18.5	18.5	18.5	206.89	0	18413000000	10152000000	8260600000	9	15	11	9	7	10	11	11	13	11	12	15	10	14	O14981;O14981-2	O14981	TATA-binding protein-associated factor 172	BTAF1
NaN	NaN	NaN	NaN	NaN	NaN	NaN	NaN	NaN	NaN	NaN	NaN	NaN	NaN	+			17	1	0	15.2	1.5	0	110.25	1	3580300	3580300	0	9	11	12	10	11	10	11	9	9	10	10	6	10	9	O14983;O14983-2;O14983-3	O14983;O14983-2;O14983-3	Sarcoplasmic/endoplasmic reticulum calcium ATPase 1	ATP2A1
NaN	0.75026	0.78485	NaN	0.82429	NaN	NaN	NaN	NaN	NaN	NaN	NaN	NaN	NaN				6	6	6	6.1	6.1	6.1	151.61	0	787390000	469350000	318040000	1	2	2	2	2	1	1	1	1	0	0	0	1	1	O15013;O15013-7;O15013-4;O15013-5;O15013-6	O15013;O15013-7;O15013-4;O15013-5;O15013-6	Rho guanine nucleotide exchange factor 10	ARHGEF10
1.2058	1.0691	1.0325	0.98505	0.85686	1.5526	0.57768	1.2328	0.88979	0.85605	1.3183	1.0235	0.81038	NaN				33	23	23	17.9	14.3	14.3	271.32	0	26327000000	13672000000	12655000000	17	18	17	19	16	17	14	13	13	12	12	14	11	7	O15020;O15020-2	O15020;O15020-2	Spectrin beta chain, non-erythrocytic 2	SPTBN2
1.0315	0.87816	1.0679	0.93103	0.72442	1.2354	0.53323	1.072	0.69765	0.79816	0.66553	0.76006	0.59703	0.7129				30	30	30	19.9	19.9	19.9	233.51	0	27291000000	14180000000	13111000000	10	12	12	17	17	13	14	12	12	13	14	13	12	13	O15027;O15027-5;O15027-2;O15027-4;O15027-3	O15027;O15027-5;O15027-2;O15027-4;O15027-3	Protein transport protein Sec16A	SEC16A
0.99776	0.88689	0.91868	0.80156	0.69242	1.2516	0.58417	0.97961	0.68044	0.79783	0.75862	0.74246	0.71261	0.79039				37	37	36	28.1	28.1	27.7	205.12	0	57808000000	33035000000	24772000000	19	19	19	19	19	20	20	19	19	21	18	17	18	20	O15031;O60486	O15031	Plexin-B2	PLXNB2
1.0449	0.90362	1.003	0.94978	0.7338	1.331	0.59107	1.071	0.69325	0.8616	0.82034	0.86773	0.71057	0.79586				24	24	24	28.7	28.7	28.7	118.29	0	88952000000	47843000000	41109000000	14	17	16	17	17	13	16	12	14	12	14	14	15	17	O15042;O15042-2;O15042-3	O15042;O15042-2;O15042-3	U2 snRNP-associated SURP motif-containing protein	U2SURP
NaN	NaN	NaN	NaN	NaN	NaN	NaN	NaN	NaN	NaN	NaN	NaN	NaN	NaN				4	4	4	2.9	2.9	2.9	186.03	0	921320000	467020000	454290000	0	1	1	0	2	1	2	1	1	1	0	1	0	1	O15047	O15047	Histone-lysine N-methyltransferase SETD1A	SETD1A
0.96349	0.94658	0.98237	0.98031	0.79658	1.3415	0.7889	1.011	0.83834	0.91265	0.9972	1.086	0.86241	0.83127				48	48	48	49.9	49.9	49.9	144.73	0	473800000000	247320000000	226480000000	33	36	32	36	33	35	35	35	38	34	34	33	33	33	O15067	O15067	Phosphoribosylformylglycinamidine synthase	PFAS
NaN	NaN	0.63547	0.84909	0.74847	NaN	0.46032	1.0418	0.73238	1.106	1.2934	1.3269	0.6387	0.7243				17	17	14	24.2	24.2	20.6	112.96	0	9430100000	4822300000	4607800000	0	3	5	2	5	1	3	9	4	6	6	7	6	7	O15084;O15084-4;O15084-1;O15084-2;Q8N8A2-5;Q8N8A2-3	O15084;O15084-4;O15084-1;O15084-2	Serine/threonine-protein phosphatase 6 regulatory ankyrin repeat subunit A	ANKRD28
NaN	0.69551	1.0985	1.0634	0.81309	0.91063	0.77255	0.85175	0.62404	NaN	0.93643	0.75771	0.6955	0.64563				7	7	7	14.1	14.1	14.1	67.315	0	3267500000	1832000000	1435600000	4	2	4	3	2	4	3	6	3	3	4	3	3	3	O15091;O15091-4;O15091-2;O15091-3	O15091;O15091-4;O15091-2	Mitochondrial ribonuclease P protein 3	KIAA0391
NaN	NaN	NaN	NaN	NaN	NaN	NaN	NaN	NaN	NaN	NaN	NaN	NaN	NaN				5	4	4	7.5	6.4	6.4	84.639	0	1509900000	943950000	565930000	1	2	1	2	1	1	2	1	3	1	0	1	1	1	O15111	O15111	Inhibitor of nuclear factor kappa-B kinase subunit alpha	CHUK
0.99381	1.1031	NaN	1.0224	NaN	1.6584	NaN	0.92349	0.76251	0.80735	0.74804	0.96853	0.70696	0.64549				3	3	3	36.1	36.1	36.1	15.179	0	6668400000	3902400000	2766000000	2	2	2	2	2	3	3	3	3	3	3	3	2	2	O15116	O15116	U6 snRNA-associated Sm-like protein LSm1	LSM1
NaN	NaN	NaN	NaN	NaN	NaN	NaN	NaN	NaN	NaN	NaN	NaN	NaN	NaN				5	5	5	4.5	4.5	4.5	142.17	0	997710000	506310000	491400000	1	1	2	0	1	1	1	2	2	2	1	1	1	2	O15118;O15118-2	O15118;O15118-2	Niemann-Pick C1 protein	NPC1
NaN	NaN	NaN	NaN	NaN	NaN	NaN	1.1696	1.2307	1.7954	1.0674	1.6359	0.96917	0.82637				3	3	3	15.8	15.8	15.8	37.866	0	8383200000	4711100000	3672000000	1	0	1	1	1	1	1	2	2	2	3	3	2	1	O15121	O15121	Sphingolipid delta(4)-desaturase DES1	DEGS1
1.02	0.9081	0.87169	0.7341	0.57015	1.1339	0.36669	0.88599	0.5855	0.72393	0.80015	0.75201	0.6054	0.67999				6	6	6	26.9	26.9	26.9	37.92	0	53098000000	31294000000	21804000000	4	4	4	5	4	4	4	4	5	5	4	3	4	4	O15126;O15126-2	O15126;O15126-2	Secretory carrier-associated membrane protein 1	SCAMP1
NaN	NaN	NaN	NaN	NaN	NaN	0.93906	NaN	NaN	NaN	NaN	NaN	NaN	1.4038				3	3	3	13.7	13.7	13.7	36.648	0	579310000	226330000	352980000	0	0	0	0	0	1	1	2	0	1	0	0	1	2	O15127	O15127	Secretory carrier-associated membrane protein 2	SCAMP2
0.97083	0.87266	0.84756	0.9115	0.72199	1.2585	0.5271	0.98339	0.66625	0.81607	0.77427	0.87776	0.73689	0.74595				16	16	15	52.2	52.2	46	40.949	0	134420000000	72400000000	62018000000	12	12	11	11	13	12	12	12	10	12	11	11	9	10	O15143	O15143	Actin-related protein 2/3 complex subunit 1B	ARPC1B
0.94572	0.96361	0.9935	0.98838	0.78449	1.2732	0.61325	0.99407	0.79012	0.84923	0.81724	0.87256	0.68465	0.73459				12	12	12	41	41	41	34.333	0	127860000000	68785000000	59074000000	10	11	11	10	10	10	10	9	10	9	9	11	9	10	O15144	O15144	Actin-related protein 2/3 complex subunit 2	ARPC2
1.0398	0.99996	0.98948	0.87823	0.64565	1.3998	0.47663	1.0403	0.62236	0.76389	0.7791	0.75269	0.72983	0.68876				6	6	6	22.5	22.5	22.5	20.546	0	86677000000	48390000000	38287000000	5	6	6	5	5	5	3	4	4	4	4	4	3	4	O15145	O15145	Actin-related protein 2/3 complex subunit 3	ARPC3
NaN	NaN	0.89047	0.96183	NaN	NaN	0.667	NaN	NaN	NaN	NaN	NaN	NaN	NaN				2	2	2	24.6	24.6	24.6	13.289	0	2250600000	1194000000	1056600000	2	2	2	2	2	2	2	2	1	0	1	1	0	0	O15155;O15155-2	O15155;O15155-2	BET1 homolog	BET1
0.96268	0.98762	0.96444	0.91924	0.68704	1.3357	0.63005	1.0025	0.64688	0.78173	0.7498	0.75526	0.76211	0.68193				11	11	11	36.7	36.7	36.7	39.249	0	53803000000	28108000000	25695000000	11	10	11	10	11	9	9	8	8	11	9	9	8	10	O15160;O15160-2	O15160;O15160-2	DNA-directed RNA polymerases I and III subunit RPAC1	POLR1C
NaN	NaN	0.8898	NaN	NaN	1.3866	NaN	1.1007	0.67408	0.81799	0.7927	0.85058	0.70084	0.63336				12	11	11	16.3	15.5	15.5	116.83	0	5262800000	2950100000	2312800000	2	4	4	3	4	3	4	3	4	4	6	5	6	3	O15164;O15164-2	O15164;O15164-2	Transcription intermediary factor 1-alpha	TRIM24
0.90495	0.79186	1.1316	0.71642	0.76659	1.4169	0.55072	1.0128	0.52841	0.7035	0.84614	0.73542	0.61763	0.69319				7	6	6	43.5	39.5	39.5	23.818	0	17817000000	10310000000	7506500000	5	6	4	5	5	4	4	5	4	4	4	4	4	3	O15173;O15173-2	O15173;O15173-2	Membrane-associated progesterone receptor component 2	PGRMC2
NaN	NaN	NaN	NaN	NaN	NaN	NaN	NaN	NaN	NaN	NaN	NaN	NaN	NaN				1	1	1	2.3	2.3	2.3	47.443	0.0078496	5917400000	4588800000	1328600000	0	0	0	0	0	1	0	0	0	0	1	0	0	0	O15178;O15178-2	O15178;O15178-2	Brachyury protein	T
0.93118	0.86976	0.88613	0.93558	0.66083	1.3144	0.624	1.0213	0.71251	0.84243	0.79727	0.84714	0.75979	0.73234				7	7	7	57.4	57.4	57.4	14.582	0	129000000000	70777000000	58227000000	7	7	7	7	6	6	7	6	5	6	5	6	6	6	O15212	O15212	Prefoldin subunit 6	PFDN6
1.047	0.95536	1.0239	NaN	NaN	NaN	0.7763	1.0822	0.63031	NaN	NaN	NaN	NaN	NaN				4	4	4	12.1	12.1	12.1	68.07	0	3457100000	1970600000	1486500000	3	3	2	3	2	2	3	2	3	2	2	1	0	2	O15213	O15213	WD repeat-containing protein 46	WDR46
1.026	0.86313	0.91482	0.89154	0.72838	1.2888	0.56124	1.0179	0.69335	0.81884	0.87105	0.83107	0.81432	0.78484				27	27	27	44.5	44.5	44.5	77.672	0	79880000000	43987000000	35894000000	16	21	21	21	20	13	17	21	14	17	14	14	15	15	O15226;O15226-2	O15226;O15226-2	NF-kappa-B-repressing factor	NKRF
NaN	NaN	NaN	0.92841	NaN	NaN	NaN	NaN	NaN	NaN	1.1092	NaN	NaN	NaN				4	4	4	9	9	9	77.187	0	1501900000	842170000	659700000	2	0	2	3	2	2	3	1	2	0	2	2	0	0	O15228;O15228-2	O15228;O15228-2	Dihydroxyacetone phosphate acyltransferase	GNPAT
NaN	NaN	NaN	NaN	NaN	NaN	NaN	NaN	NaN	NaN	NaN	NaN	NaN	NaN				10	10	9	4.1	4.1	3.7	399.73	0	773790000	423720000	350070000	2	3	0	2	2	0	2	3	2	2	2	1	1	0	O15230;O15230-2	O15230	Laminin subunit alpha-5	LAMA5
1.0941	0.87445	0.99385	1.0785	0.68732	NaN	0.79395	NaN	NaN	0.83371	NaN	NaN	NaN	NaN				2	2	2	3.4	3.4	3.4	76.277	0.00059571	1643400000	867460000	775990000	1	2	2	1	1	1	2	1	1	1	2	1	1	1	O15234	O15234	Protein CASC3	CASC3
1.1294	0.93746	0.90973	0.78316	0.72796	1.0207	0.36348	NaN	0.82932	1.1745	NaN	NaN	1.113	NaN				2	2	2	26.1	26.1	26.1	15.173	0	8640000000	4602000000	4037900000	1	2	1	1	2	2	2	1	2	2	0	1	2	1	O15235	O15235	28S ribosomal protein S12, mitochondrial	MRPS12
NaN	NaN	NaN	NaN	0.93872	NaN	NaN	1.0434	0.61458	0.72495	0.8384	0.84353	0.81633	0.68437				5	5	5	29.6	29.6	29.6	22.958	0	14226000000	8300500000	5925000000	2	2	1	3	2	2	2	3	3	3	3	3	4	4	O15258	O15258	Protein RER1	RER1
1.0295	1.0191	0.72821	0.64782	0.75723	1.242	NaN	1.0779	0.66327	0.8536	0.84732	0.82477	0.72438	0.74914				4	4	4	11.9	11.9	11.9	30.394	0	49946000000	28122000000	21823000000	2	2	2	2	2	2	2	2	2	3	2	2	2	2	O15260;O15260-2;O15260-3	O15260;O15260-2;O15260-3	Surfeit locus protein 4	SURF4
0.86263	0.68887	1.1108	0.70375	0.65969	1.4082	0.45567	0.94824	NaN	NaN	0.73443	0.61977	1.115	NaN				11	11	11	24.1	24.1	24.1	52.743	0	9837900000	5010200000	4827800000	6	5	6	6	5	6	7	4	3	3	4	4	3	3	O15269;O15269-2	O15269	Serine palmitoyltransferase 1	SPTLC1
NaN	NaN	NaN	0.92006	NaN	NaN	NaN	0.9938	1.0215	1.0814	0.88457	1.5205	2.012	0.73099				8	8	8	19.2	19.2	19.2	62.924	0	2049700000	866380000	1183300000	0	1	1	3	2	2	2	4	4	3	3	2	3	3	O15270	O15270	Serine palmitoyltransferase 2	SPTLC2
0.92427	0.92334	0.9253	1.0561	0.80918	1.3885	0.67989	1.077	0.76007	0.89828	0.85122	0.99463	0.789	0.74333				26	26	26	38	38	38	116.92	0	47774000000	24312000000	23462000000	11	13	13	12	13	15	12	18	20	15	17	15	17	16	O15294;O15294-3;O15294-2;O15294-4	O15294;O15294-3;O15294-2;O15294-4	UDP-N-acetylglucosamine--peptide N-acetylglucosaminyltransferase 110 kDa subunit	OGT
1.1003	0.97907	0.92388	0.90757	0.68392	1.4282	0.60193	1.0212	0.73583	0.84275	0.73927	0.84496	0.73478	0.77312				13	13	13	44.3	44.3	44.3	28.082	0	64336000000	32999000000	31337000000	11	9	10	10	11	10	9	10	9	8	10	10	8	9	O15305;O15305-2	O15305	Phosphomannomutase 2	PMM2
NaN	NaN	NaN	0.99599	NaN	NaN	NaN	NaN	NaN	NaN	NaN	NaN	NaN	NaN				3	3	3	14.3	14.3	14.3	25.914	0	413160000	287980000	125180000	2	2	3	3	1	1	1	0	0	0	0	0	0	0	O15318	O15318	DNA-directed RNA polymerase III subunit RPC7	POLR3G
1.0613	0.83747	0.83865	0.74448	0.73719	1.4261	0.54034	1.4446	0.49634	0.85156	NaN	0.92998	NaN	0.93901				13	13	13	19.7	19.7	19.7	90.995	0	6209900000	3559400000	2650500000	8	6	9	10	7	7	8	3	4	4	2	3	3	2	O15320;Q96PC5;O15320-8;O15320-7;O15320-2;O15320-4;O15320-3;O15320-10;O15320-6;O15320-5;O15320-9;Q96RT6;Q86UF2;Q8IX94;P0CG41;A4FU28;A4D2H0;Q8IX95	O15320;Q96PC5;O15320-8;O15320-7;O15320-2;O15320-4;O15320-3;O15320-10;O15320-6;O15320-5;O15320-9	cTAGE family member 5;Melanoma inhibitory activity protein 2	CTAGE5;MIA2
1.4911	1.0143	0.9391	0.82218	0.85516	1.3415	0.45307	1.2335	0.80274	0.68378	0.59737	1.0777	0.53036	NaN				14	14	14	26.5	26.5	26.5	75.25	0	12928000000	7096600000	5831600000	6	7	9	7	6	7	6	5	7	3	4	7	5	4	O15344;O15344-2	O15344;O15344-2	Midline-1	MID1
1.0562	0.85291	0.85891	0.84873	0.65199	1.1202	0.50637	1.0395	0.62393	0.77673	0.79522	0.75196	0.72451	0.70833				6	6	6	28.5	28.5	28.5	22.98	0	72521000000	42813000000	29708000000	4	4	4	4	4	4	4	4	4	4	4	5	4	4	O15347	O15347	High mobility group protein B3	HMGB3
1.0127	0.92571	1.0074	0.97368	0.74938	1.3886	0.52864	1.0017	0.75381	0.83639	0.76877	0.89861	0.74546	0.76811				17	17	17	41	41	41	59.271	0	127490000000	67807000000	59679000000	12	11	9	11	11	11	12	14	14	13	11	13	12	10	O15355	O15355	Protein phosphatase 1G	PPM1G
1.036	1.0215	0.99075	0.83385	0.73401	1.224	0.54857	0.95984	0.61242	0.76818	0.89011	0.75482	0.70388	0.6789				26	26	25	26.6	26.6	25.8	138.6	0	22582000000	13035000000	9547000000	8	10	9	11	9	8	9	11	14	13	14	13	11	11	O15357;O15357-2	O15357;O15357-2	Phosphatidylinositol 3,4,5-trisphosphate 5-phosphatase 2	INPPL1
1.0185	0.99054	1.0577	0.94992	0.80262	1.4705	0.62953	1.0904	0.73293	0.9426	0.85259	0.84123	0.87716	0.8315				28	28	28	56.2	56.2	56.2	63.972	0	249220000000	130660000000	118560000000	22	20	18	21	19	16	21	18	17	17	16	19	15	19	O15371;O15371-2;O15371-3	O15371;O15371-2;O15371-3	Eukaryotic translation initiation factor 3 subunit D	EIF3D
0.96127	0.91174	0.91786	0.94026	0.72182	1.2274	0.62517	1.0861	0.6969	0.9296	0.82307	1.0155	0.77689	0.71596				12	12	12	35.8	35.8	35.8	39.93	0	140420000000	77471000000	62952000000	7	8	9	8	9	9	9	10	10	11	10	10	10	9	O15372	O15372	Eukaryotic translation initiation factor 3 subunit H	EIF3H
NaN	NaN	NaN	0.4444	0.59356	NaN	NaN	0.96153	0.59043	0.80665	0.81268	NaN	0.82744	0.69774				5	4	4	15	13.1	13.1	48.847	0	4264300000	2632900000	1631400000	2	2	2	3	3	1	2	4	4	4	4	2	4	3	O15379;O15379-2	O15379;O15379-2	Histone deacetylase 3	HDAC3
0.97751	0.86838	0.82844	0.83466	0.72045	1.1674	0.51872	0.98982	0.64134	0.80761	0.80898	0.77719	0.73738	0.65297				28	28	28	40	40	40	95.05	0	45678000000	24531000000	21147000000	12	10	12	15	18	13	14	15	13	14	13	16	10	12	O15381;O15381-2;O15381-5;O15381-3;O15381-4	O15381;O15381-2;O15381-5;O15381-3;O15381-4	Nuclear valosin-containing protein-like	NVL
0.99829	0.91643	0.89897	0.81982	0.58417	1.1431	0.4531	1.084	0.69346	0.93714	0.80642	0.81294	0.88126	0.77846				15	15	15	47.2	47.2	47.2	44.287	0	39918000000	21817000000	18100000000	8	9	9	8	8	7	9	9	10	9	9	10	11	11	O15382;O15382-2	O15382;O15382-2	Branched-chain-amino-acid aminotransferase, mitochondrial	BCAT2
1.0836	0.96207	1.1288	1.0007	1.0049	1.635	0.92524	NaN	0.7426	0.88644	0.85636	0.93856	1.0951	0.8811				7	7	7	62	62	62	16.389	0	7677800000	4098200000	3579700000	5	5	3	4	2	5	3	1	6	5	2	4	5	4	O15392;O15392-5;O15392-4;O15392-2;O15392-7;O15392-6;O15392-3	O15392;O15392-5;O15392-4;O15392-2	Baculoviral IAP repeat-containing protein 5	BIRC5
1.0247	0.87088	0.92409	0.93237	0.8191	1.4406	0.49647	1.0073	0.82225	0.81264	0.84537	0.868	0.85763	0.80732				15	14	14	18.6	17.6	17.6	119.94	0	32717000000	16315000000	16402000000	8	9	10	8	10	6	8	8	10	9	10	9	7	9	O15397;O15397-2	O15397;O15397-2	Importin-8	IPO8
NaN	0.96555	1.1253	0.87987	0.9099	NaN	NaN	2.2607	NaN	NaN	1.3391	NaN	NaN	NaN				5	5	5	26.8	26.8	26.8	29.815	0	12805000000	7096900000	5708000000	3	3	3	4	3	2	3	3	2	3	4	2	4	3	O15400;O15400-2	O15400;O15400-2	Syntaxin-7	STX7
1.0201	0.93539	1.0713	0.8659	0.8394	1.2512	0.83518	0.96785	0.9509	0.96692	0.97923	0.99915	0.9189	0.88736				7	7	7	15.9	15.9	15.9	49.469	0	103960000000	53813000000	50147000000	6	7	5	6	7	7	6	6	6	5	7	6	6	7	O15427	O15427	Monocarboxylate transporter 4	SLC16A3
NaN	NaN	NaN	NaN	NaN	NaN	NaN	NaN	NaN	NaN	NaN	NaN	NaN	NaN				1	1	1	10	10	10	21.09	0.0022745	854100000	410690000	443400000	0	0	0	0	0	0	0	1	1	0	1	1	1	1	O15431	O15431	High affinity copper uptake protein 1	SLC31A1
1.2274	0.98048	0.98829	0.95704	0.74534	1.183	0.84063	NaN	0.66408	0.92772	0.94557	NaN	NaN	0.72079				14	14	14	13.4	13.4	13.4	149.52	0	9073700000	5120600000	3953100000	5	5	5	5	6	3	3	4	4	3	6	5	2	7	O15439;O15439-2;O15439-4;O15439-3	O15439;O15439-2	Multidrug resistance-associated protein 4	ABCC4
NaN	NaN	NaN	NaN	NaN	NaN	NaN	NaN	NaN	NaN	NaN	NaN	NaN	NaN				3	3	3	3.1	3.1	3.1	160.66	0.0013431	208940000	123490000	85452000	1	1	1	1	1	0	0	0	1	0	1	0	0	0	O15440;O15440-5	O15440;O15440-5	Multidrug resistance-associated protein 5	ABCC5
1.1063	0.9392	0.82964	0.86334	0.67186	1.3247	0.4848	1.0576	0.57527	0.71152	0.82949	0.6959	0.71539	0.81849				10	10	10	36.1	36.1	36.1	54.985	0	20333000000	11156000000	9176500000	5	6	8	7	7	8	6	5	5	7	6	6	7	6	O15446;O15446-2	O15446;O15446-2	DNA-directed RNA polymerase I subunit RPA34	CD3EAP
1.0288	0.96988	1.0297	0.88394	0.75218	1.2528	0.56531	1.3463	0.69603	0.84115	1.1639	0.74558	0.86704	0.73867				13	13	13	29.3	29.3	29.3	60.901	0	10190000000	5225800000	4964500000	9	7	6	9	8	7	9	4	4	3	3	4	3	4	O15460;O15460-2	O15460;O15460-2	Prolyl 4-hydroxylase subunit alpha-2	P4HA2
0.95334	0.7213	0.87966	0.76276	0.59087	1.1723	0.7162	0.96345	0.6352	0.82816	0.75445	0.76771	0.88955	0.72997				9	9	9	51	51	51	22.417	0	14800000000	8098200000	6702100000	6	6	7	6	6	7	5	7	5	7	7	5	4	4	O15498;O15498-2	O15498;O15498-2	Synaptobrevin homolog YKT6	YKT6
1.1336	0.68351	0.9661	NaN	NaN	NaN	0.47209	NaN	NaN	0.70076	NaN	NaN	NaN	NaN				2	2	2	5.7	5.7	5.7	44.871	0	2430000000	1482900000	947170000	2	2	2	1	2	2	2	1	2	2	2	2	2	2	O15504;O15504-3;O15504-2	O15504;O15504-3;O15504-2	Nucleoporin-like protein 2	NUPL2
1.0711	0.92234	1.046	1.0276	0.76925	1.3663	0.60297	1.0553	0.82967	0.86967	0.91675	0.88813	0.806	0.74014				7	7	6	62.9	62.9	57.6	16.32	0	79401000000	41135000000	38266000000	5	5	5	6	6	5	6	7	5	6	6	6	6	7	O15511;O15511-2	O15511;O15511-2	Actin-related protein 2/3 complex subunit 5	ARPC5
NaN	NaN	NaN	NaN	NaN	NaN	NaN	1.5981	0.57368	NaN	NaN	NaN	0.56393	NaN				3	3	3	35.9	35.9	35.9	16.311	0	1094600000	637700000	456930000	2	1	1	2	0	1	1	3	2	3	2	1	2	1	O15514	O15514	DNA-directed RNA polymerase II subunit RPB4	POLR2D
0.79918	0.93771	1.0165	0.72355	0.74233	1.1477	0.62695	0.96	0.67026	0.83208	0.81147	0.71814	0.68599	0.78345				5	5	5	12.1	12.1	12.1	47.625	0	37585000000	20531000000	17055000000	3	5	4	5	5	4	3	3	4	5	5	4	5	5	O15533;O15533-2;O15533-3;O15533-4	O15533;O15533-2;O15533-3	Tapasin	TAPBP
NaN	NaN	NaN	NaN	0.89149	1.2596	1.32	0.99427	NaN	NaN	0.85306	0.85812	0.68316	0.77865				6	6	5	22.4	22.4	19.8	38.787	0	3417600000	1793900000	1623700000	3	3	5	4	5	5	5	3	1	1	2	2	2	3	O15541	O15541	RING finger protein 113A	RNF113A
0.99697	0.98249	0.9858	0.94549	0.77	1.4193	0.61558	0.9661	0.68118	0.80178	0.78298	0.82872	0.75798	0.71954				33	33	32	43.3	43.3	42.1	90.932	0	442650000000	232490000000	210170000000	26	25	26	28	25	25	23	27	27	23	25	26	24	26	O43143	O43143	Putative pre-mRNA-splicing factor ATP-dependent RNA helicase DHX15	DHX15
0.94527	1.0903	NaN	NaN	NaN	NaN	0.57696	1.089	0.85086	0.91691	0.86352	0.84471	0.87322	0.81304				10	10	10	23.7	23.7	23.7	54.843	0	7725800000	3748300000	3977500000	5	7	7	5	3	6	4	5	4	5	3	5	4	4	O43148;O43148-2	O43148;O43148-2	mRNA cap guanine-N7 methyltransferase	RNMT
1.2836	0.8275	0.8676	1.0021	NaN	NaN	NaN	0.94887	NaN	NaN	NaN	NaN	NaN	NaN				9	9	9	3.9	3.9	3.9	331.07	0	1668400000	906070000	762300000	2	2	4	3	1	1	1	5	3	1	1	1	0	3	O43149;O43149-3	O43149;O43149-3	Zinc finger ZZ-type and EF-hand domain-containing protein 1	ZZEF1
NaN	NaN	NaN	NaN	NaN	NaN	NaN	NaN	NaN	NaN	NaN	NaN	NaN	NaN				4	4	3	5.1	5.1	4.1	111.65	0	838650000	463890000	374760000	0	0	0	1	0	1	1	0	0	1	0	0	1	1	O43150;O43150-2	O43150;O43150-2	Arf-GAP with SH3 domain, ANK repeat and PH domain-containing protein 2	ASAP2
NaN	NaN	NaN	NaN	NaN	NaN	NaN	NaN	NaN	NaN	NaN	NaN	NaN	1.0184				7	7	7	8.5	8.5	8.5	122.07	0	972210000	456690000	515520000	0	2	0	1	1	1	2	2	2	0	0	1	1	3	O43156	O43156	TELO2-interacting protein 1 homolog	TTI1
1.0902	0.98852	1.0241	0.96747	0.75134	1.3175	0.72097	1.1025	0.75021	0.85548	0.83776	0.81007	0.76992	0.7405				11	11	11	33.3	33.3	33.3	50.714	0	35457000000	19113000000	16344000000	9	9	8	7	9	7	10	5	8	5	8	6	6	7	O43159	O43159	Ribosomal RNA-processing protein 8	RRP8
0.9881	0.92709	0.96917	0.76798	0.78336	1.3943	1.0582	0.83788	0.83242	1.0836	1.0443	1.0545	1.1558	1.083				5	5	5	54.8	54.8	54.8	16.332	0	48525000000	24285000000	24239000000	5	4	5	5	4	5	5	4	5	5	4	4	4	4	O43169	O43169	Cytochrome b5 type B	CYB5B
1.0135	0.89783	0.9163	0.90803	0.71353	1.313	0.82948	1.0106	0.75042	0.85413	0.84936	0.88839	0.81377	0.7353				22	22	22	54.8	54.8	54.8	58.449	0	151720000000	79652000000	72068000000	17	16	17	18	15	16	17	14	13	16	16	15	13	14	O43172;O43172-2	O43172;O43172-2	U4/U6 small nuclear ribonucleoprotein Prp4	PRPF4
0.97917	0.92555	0.90399	0.91688	0.68509	1.3085	0.55793	0.99467	0.7562	0.81342	0.8274	0.88098	0.80477	0.77155				27	27	27	56.3	56.3	56.3	56.65	0	2747900000000	1475400000000	1272500000000	22	20	20	21	20	21	22	21	21	21	21	22	20	21	O43175	O43175	D-3-phosphoglycerate dehydrogenase	PHGDH
1.1079	0.8447	0.82588	0.83449	0.69651	1.1581	0.49902	0.99581	0.56358	1.0152	NaN	0.79167	0.69483	0.70633				3	3	3	19.4	19.4	19.4	20.108	0	24518000000	13692000000	10825000000	3	3	3	3	3	3	3	2	1	3	2	2	2	2	O43181	O43181	NADH dehydrogenase [ubiquinone] iron-sulfur protein 4, mitochondrial	NDUFS4
NaN	NaN	NaN	NaN	NaN	NaN	NaN	NaN	NaN	0.84503	NaN	NaN	NaN	NaN				2	2	2	5.7	5.7	5.7	62.822	0.0017185	799440000	574310000	225130000	0	0	0	1	0	0	1	2	1	1	1	0	0	1	O43182-5;O43182-2;O43182;O43182-3;O43182-4	O43182-5;O43182-2;O43182;O43182-3;O43182-4	Rho GTPase-activating protein 6	ARHGAP6
0.96726	0.94317	0.78326	1.0312	0.84053	1.1801	0.60485	0.7722	0.71525	0.76117	0.80262	0.78514	0.75964	0.70678				13	12	12	31.7	29.1	29.1	54.099	0	30701000000	16212000000	14488000000	7	8	10	12	11	11	6	7	8	10	9	8	7	9	O43237;O43237-2	O43237;O43237-2	Cytoplasmic dynein 1 light intermediate chain 2	DYNC1LI2
1.0287	0.95303	0.95744	0.95452	0.77247	1.4231	0.57057	1.0013	0.68738	0.78039	0.77473	0.80701	0.75376	0.69995				31	31	31	56.6	56.6	56.6	60.977	0	215610000000	115080000000	100530000000	23	22	22	22	23	22	25	24	20	22	20	23	21	24	O43242;O43242-2	O43242;O43242-2	26S proteasome non-ATPase regulatory subunit 3	PSMD3
NaN	0.95402	0.85477	NaN	0.63319	NaN	0.56526	1.0724	0.92455	0.97338	1.1538	1.3517	1.3235	0.66177				5	5	2	16.4	16.4	10.9	47.215	0	3385100000	1865700000	1519400000	1	2	3	2	2	1	1	3	3	3	3	3	3	2	O43251-6;O43251-8;O43251;O43251-10;O43251-5;O43251-2;O43251-3	O43251-6;O43251-8;O43251;O43251-10;O43251-5;O43251-2	RNA binding protein fox-1 homolog 2	RBFOX2
1.0795	0.91503	1.0769	0.96058	0.7398	1.2666	0.61705	0.92014	0.68834	0.85013	0.8774	0.92123	0.82915	0.73522				15	14	13	29.8	27.6	26.1	70.832	0	24658000000	12561000000	12097000000	5	7	6	8	8	5	8	10	9	8	8	9	8	9	O43252	O43252	Bifunctional 3-phosphoadenosine 5-phosphosulfate synthase 1;Sulfate adenylyltransferase;Adenylyl-sulfate kinase	PAPSS1
0.92167	0.80492	0.78765	0.8235	0.64822	1.2191	0.54334	1.0511	0.65668	1.0099	0.80612	0.84925	0.86428	0.84252				20	20	20	33.6	33.6	33.6	88.828	0	12167000000	6370000000	5797100000	11	13	13	11	8	6	9	9	11	8	7	8	10	9	O43264;O43264-2	O43264;O43264-2	Centromere/kinetochore protein zw10 homolog	ZW10
NaN	NaN	NaN	NaN	NaN	NaN	NaN	1.3984	0.8696	1.0018	1.0633	0.97441	0.95539	0.91381				1	1	1	2.1	2.1	2.1	45.118	0.007841	10781000000	5467300000	5314000000	1	1	1	1	1	1	1	1	1	1	1	1	1	1	O43286	O43286	Beta-1,4-galactosyltransferase 5	B4GALT5
0.95458	1.0734	1.1005	1.0192	0.94258	1.3885	0.62658	1.0759	0.72264	0.87127	0.79916	0.86549	0.7712	0.77609				22	22	22	36	36	36	90.254	0	30223000000	15991000000	14233000000	12	10	12	11	10	11	12	13	10	10	14	11	13	11	O43290	O43290	U4/U6.U5 tri-snRNP-associated protein 1	SART1
NaN	NaN	0.73958	NaN	NaN	NaN	NaN	NaN	NaN	NaN	NaN	NaN	NaN	NaN				5	5	5	10.3	10.3	10.3	67.622	0	1730800000	950360000	780400000	2	1	2	3	1	2	2	0	2	1	0	0	0	1	O43292;O43292-2	O43292;O43292-2	Glycosylphosphatidylinositol anchor attachment 1 protein	GPAA1
NaN	NaN	NaN	0.72213	NaN	NaN	NaN	NaN	NaN	0.75562	NaN	0.85879	NaN	NaN				3	3	3	7.7	7.7	7.7	52.535	0	1078000000	630660000	447330000	1	1	1	3	3	1	1	2	1	2	1	2	1	2	O43293;O43293-2	O43293;O43293-2	Death-associated protein kinase 3	DAPK3
NaN	NaN	NaN	NaN	NaN	NaN	NaN	NaN	NaN	NaN	NaN	NaN	NaN	NaN				1	1	1	1.7	1.7	1.7	88.604	0.00039976	0	0	0	0	0	0	0	0	0	0	0	0	0	0	0	0	1	O43299;O43299-2	O43299;O43299-2	AP-5 complex subunit zeta-1	AP5Z1
NaN	NaN	NaN	NaN	NaN	NaN	NaN	NaN	NaN	NaN	NaN	NaN	NaN	NaN				8	8	5	9.2	9.2	5.3	140.41	0	608580000	453630000	154960000	1	1	1	2	0	0	2	4	3	2	1	1	0	3	O43314;O43314-2	O43314;O43314-2	Inositol hexakisphosphate and diphosphoinositol-pentakisphosphate kinase 2	PPIP5K2
NaN	NaN	NaN	NaN	NaN	NaN	NaN	NaN	NaN	NaN	NaN	NaN	NaN	NaN				7	7	7	17.3	17.3	17.3	67.195	0	1229900000	898920000	331010000	3	2	3	1	3	1	5	0	0	0	0	1	0	1	O43318;O43318-2;O43318-4;O43318-3	O43318;O43318-2;O43318-4;O43318-3	Mitogen-activated protein kinase kinase kinase 7	MAP3K7
1.0325	1.0016	0.92703	0.92393	0.72536	1.4116	0.50118	0.94802	0.64982	0.8062	0.72497	0.74119	0.73209	0.6926				7	7	7	39.7	39.7	39.7	19.81	0	41547000000	18151000000	23397000000	4	6	5	5	5	6	4	4	5	5	6	5	6	4	O43324;O43324-2	O43324;O43324-2	Eukaryotic translation elongation factor 1 epsilon-1	EEF1E1
0.45753	0.79713	NaN	NaN	NaN	1.1943	NaN	NaN	NaN	NaN	NaN	NaN	NaN	NaN				5	5	5	13.3	13.3	13.3	61.194	0	1113700000	558630000	555050000	3	3	1	2	1	2	1	3	1	0	1	0	1	0	O43353;O43353-2	O43353;O43353-2	Receptor-interacting serine/threonine-protein kinase 2	RIPK2
NaN	NaN	NaN	NaN	NaN	NaN	NaN	0.82093	1.2174	NaN	NaN	1.2706	NaN	NaN				4	4	4	5	5	5	166.51	0	972620000	524280000	448340000	0	0	1	0	1	0	0	3	3	2	1	3	0	1	O43379-4;O43379;O43379-2	O43379-4;O43379	WD repeat-containing protein 62	WDR62
0.97705	0.97415	0.9971	0.86351	0.73263	1.3787	0.7263	0.98322	0.78557	0.95278	1.0061	0.9703	0.86076	0.87961				31	31	22	52.6	52.6	42.2	70.942	0	974930000000	523240000000	451690000000	27	26	27	27	26	26	27	22	25	26	23	25	26	25	O43390;O43390-2;O43390-3;O43390-4	O43390;O43390-2;O43390-3;O43390-4	Heterogeneous nuclear ribonucleoprotein R	HNRNPR
1.0196	0.86228	0.96086	0.69223	0.75654	1.2162	0.50315	1.0269	0.63871	0.81628	0.84911	0.85518	0.76139	0.70205				21	21	21	39.7	39.7	39.7	77.528	0	80140000000	41596000000	38544000000	13	12	13	12	13	13	13	12	12	16	11	13	12	15	O43395;O43395-3	O43395	U4/U6 small nuclear ribonucleoprotein Prp3	PRPF3
0.94168	0.81295	0.87769	0.91082	0.72013	1.1825	0.64927	1.0138	0.82839	0.82489	0.88405	1.0062	0.90735	0.69303				16	16	16	57.1	57.1	57.1	32.251	0	118610000000	65070000000	53540000000	12	12	11	12	10	12	10	10	11	11	11	11	9	11	O43396	O43396	Thioredoxin-like protein 1	TXNL1
1.0044	1.0028	1.0037	0.95482	0.74559	1.3107	0.57944	1.0408	0.74142	0.80066	0.82444	0.83254	0.77666	0.79065				17	17	3	89.3	89.3	13.6	22.237	0	613250000000	326920000000	286330000000	16	16	15	15	16	16	15	14	15	15	14	15	14	14	O43399;O43399-5;O43399-7	O43399;O43399-5;O43399-7	Tumor protein D54	TPD52L2
NaN	1.2072	1.0468	1.3753	NaN	NaN	0.90534	0.98539	0.75222	NaN	0.74592	NaN	1.3938	NaN				15	1	1	90.3	6.5	6.5	19.901	0	3609400000	1653800000	1955600000	14	14	13	13	14	14	13	12	13	13	13	13	13	13	O43399-2;O43399-3;O43399-4;O43399-6	O43399-2;O43399-3;O43399-4;O43399-6	Tumor protein D54	TPD52L2
NaN	0.8607	0.87097	NaN	0.90941	1.2899	0.46799	0.99803	0.5459	0.88515	0.66919	0.5355	0.59108	0.57866				5	5	5	33.3	33.3	33.3	23.773	0	13634000000	8110800000	5523000000	2	2	3	2	2	2	3	3	3	4	2	3	3	3	O43402;O43402-2	O43402	ER membrane protein complex subunit 8	EMC8
0.97347	0.93354	0.85932	0.90081	0.6819	1.2205	0.64781	1.1227	0.85276	0.80876	0.96627	0.82688	NaN	NaN				5	5	5	16.9	16.9	16.9	37.238	0	7996200000	4584200000	3412100000	3	3	3	2	3	3	5	2	2	2	2	2	1	1	O43414;O43414-3;O43414-2	O43414;O43414-3;O43414-2	ERI1 exoribonuclease 3	ERI3
NaN	NaN	NaN	NaN	NaN	NaN	NaN	NaN	0.91574	0.99642	NaN	NaN	NaN	NaN				8	8	8	6.7	6.7	6.7	173.1	0	1455400000	709320000	746030000	2	2	0	2	2	3	2	1	4	2	2	1	0	2	O43426;O43426-4;O43426-2;O43426-5	O43426;O43426-4;O43426-2	Synaptojanin-1	SYNJ1
NaN	NaN	NaN	1.0201	0.63443	NaN	0.55651	NaN	NaN	NaN	NaN	NaN	0.8369	NaN				3	3	3	8.8	8.8	8.8	41.878	0.0024617	360340000	197170000	163170000	2	1	1	2	2	2	2	1	1	1	1	1	2	1	O43427;O43427-2	O43427;O43427-2	Acidic fibroblast growth factor intracellular-binding protein	FIBP
NaN	0.9642	NaN	NaN	NaN	NaN	NaN	NaN	NaN	NaN	NaN	NaN	NaN	NaN				11	5	5	7.5	3.9	3.9	176.65	0.0035654	9815400000	4513100000	5302300000	6	6	6	6	8	6	7	4	6	5	5	5	5	5	O43432;O43432-4;O43432-3	O43432;O43432-4;O43432-3	Eukaryotic translation initiation factor 4 gamma 3	EIF4G3
1.0042	0.86822	0.96334	0.87386	0.67694	1.2989	0.61191	1.0085	0.6463	0.75201	0.82885	0.7707	0.7097	0.67979				10	10	10	43.5	43.5	43.5	19.208	0	59220000000	33115000000	26105000000	8	7	8	7	7	7	7	6	5	7	6	6	7	6	O43447;O43447-2	O43447;O43447-2	Peptidyl-prolyl cis-trans isomerase H	PPIH
NaN	NaN	0.88842	1.051	0.96652	1.1341	0.82637	1.3499	NaN	NaN	1.0081	NaN	NaN	0.86377				5	5	5	13.3	13.3	13.3	47.907	0	3939400000	2159400000	1780100000	1	3	2	2	3	3	4	3	2	2	3	2	2	3	O43463;O43463-2	O43463;O43463-2	Histone-lysine N-methyltransferase SUV39H1	SUV39H1
NaN	NaN	NaN	NaN	NaN	NaN	0.49188	0.94624	0.73038	NaN	NaN	0.85781	0.68702	NaN				2	2	2	4.8	4.8	4.8	48.84	0	3546200000	1962100000	1584100000	2	1	1	2	2	2	2	2	2	1	2	2	2	2	O43464;O43464-2;O43464-3;O43464-4	O43464;O43464-2;O43464-3;O43464-4	Serine protease HTRA2, mitochondrial	HTRA2
1.0419	1.0354	0.9827	0.95194	0.73606	1.454	0.56259	1.0286	0.63475	0.7609	0.74713	0.72111	0.73581	0.67929				7	7	5	22.3	22.3	15	39.589	0	36981000000	20368000000	16612000000	3	4	4	5	5	6	4	5	5	4	7	5	6	5	O43488	O43488	Aflatoxin B1 aldehyde reductase member 2	AKR7A2
0.99155	0.94775	0.93773	0.89721	0.82382	1.3331	0.65381	0.9171	0.71214	0.8835	0.87318	0.92548	0.71146	0.70879				33	33	28	40.4	40.4	35.8	112.59	0	58422000000	30759000000	27663000000	12	22	19	17	18	20	21	15	16	13	12	14	13	13	O43491;O43491-4;O43491-3;O43491-2	O43491;O43491-4;O43491-3;O43491-2	Band 4.1-like protein 2	EPB41L2
NaN	NaN	NaN	NaN	NaN	NaN	NaN	NaN	NaN	NaN	NaN	NaN	NaN	NaN				2	2	2	5.8	5.8	5.8	51.112	0	369230000	212250000	156980000	0	1	1	0	0	0	1	0	0	0	0	0	0	0	O43493;O43493-2;O43493-4;O43493-5;O43493-3;O43493-6	O43493;O43493-2;O43493-4;O43493-5;O43493-3;O43493-6	Trans-Golgi network integral membrane protein 2	TGOLN2
NaN	0.69293	0.68734	0.92013	0.60292	1.1583	0.65184	1.4901	NaN	NaN	NaN	NaN	NaN	1.0236				5	5	5	96.7	96.7	96.7	9.6138	0	8736700000	5474000000	3262700000	4	2	3	4	4	4	4	4	3	2	2	2	4	3	O43504	O43504	Ragulator complex protein LAMTOR5	LAMTOR5
NaN	NaN	NaN	NaN	NaN	NaN	NaN	NaN	NaN	NaN	NaN	NaN	NaN	NaN				1	1	1	3.9	3.9	3.9	47.119	0.0035667	341060000	131950000	209110000	0	1	1	1	0	0	1	0	0	1	1	1	0	1	O43505	O43505	N-acetyllactosaminide beta-1,3-N-acetylglucosaminyltransferase	B3GNT1
NaN	NaN	NaN	NaN	NaN	NaN	NaN	NaN	NaN	NaN	NaN	NaN	NaN	NaN	+			1	1	1	1.8	1.8	1.8	96.741	1	495180000	369270000	125910000	0	0	0	0	0	0	0	0	0	0	0	0	0	0	O43525;O43525-2	O43525;O43525-2	Potassium voltage-gated channel subfamily KQT member 3	KCNQ3
1.0049	1.1778	1.1854	1.0257	0.94005	1.6879	0.76099	1.07	0.79446	0.85887	0.85496	0.8997	1.2341	0.8351				9	9	9	54	54	54	22.092	0	42286000000	23318000000	18968000000	6	5	4	7	6	6	6	5	5	5	5	5	5	5	O43583	O43583	Density-regulated protein	DENR
1.0302	0.91404	0.90213	0.97104	0.68487	1.4755	0.58568	1.0216	0.71128	0.89249	0.84578	0.84518	0.75116	0.79159				22	22	22	25.3	25.3	25.3	109.96	0	104260000000	55750000000	48510000000	13	13	13	17	14	14	16	20	19	18	18	19	17	18	O43592	O43592	Exportin-T	XPOT
0.97891	1.0236	1.2343	1.3602	0.76901	1.4891	0.73477	1.0815	0.73697	1.4986	0.80193	1.3222	1.5041	1.2331				6	6	6	31	31	31	19.108	0	51362000000	25674000000	25688000000	4	4	4	5	5	4	4	5	5	5	4	6	5	5	O43598;O43598-2	O43598;O43598-2	2-deoxynucleoside 5-phosphate N-hydrolase 1	DNPH1
0.98899	0.85842	0.8945	0.84719	0.61944	1.2153	0.51289	1.031	0.59503	0.73843	0.77545	0.75551	0.80445	0.74426				19	19	19	41.6	41.6	41.6	51.355	0	99861000000	55792000000	44070000000	15	15	16	15	14	13	14	10	9	11	10	12	10	12	O43615	O43615	Mitochondrial import inner membrane translocase subunit TIM44	TIMM44
1.0037	1.1423	1.0609	1.0718	0.78838	NaN	0.5909	NaN	NaN	NaN	0.72308	NaN	NaN	NaN				4	4	4	22.2	22.2	22.2	20.274	0	8468200000	4591800000	3876300000	4	3	4	3	4	2	4	2	1	0	3	0	2	0	O43617;O43617-2	O43617;O43617-2	Trafficking protein particle complex subunit 3	TRAPPC3
1.0274	1.0619	1.1107	1.0173	0.81749	1.501	0.95472	0.98099	0.85081	0.94354	0.90786	0.74319	0.71225	0.67792				9	9	9	29.3	29.3	29.3	25.104	0	21964000000	10656000000	11308000000	6	6	6	7	6	7	5	4	4	5	3	2	3	4	O43633	O43633	Charged multivesicular body protein 2a	CHMP2A
0.97998	0.96904	1.0291	1.0614	0.90523	1.5074	0.96616	0.98306	0.8744	1.0719	0.94207	0.97086	0.9028	0.87059				16	16	16	51.8	51.8	51.8	57.193	0	47124000000	23808000000	23317000000	11	12	11	9	12	9	8	11	9	10	11	10	11	9	O43660;O43660-2	O43660;O43660-2	Pleiotropic regulator 1	PLRG1
0.98832	0.88753	0.98153	0.86328	0.67766	1.134	0.47199	0.98356	0.74441	0.80992	0.82634	0.75799	0.63496	0.62514				21	21	1	43.5	43.5	2.6	71.606	0	59902000000	32435000000	27467000000	10	14	14	15	16	13	14	10	11	12	11	11	11	10	O43663	O43663	Protein regulator of cytokinesis 1	PRC1
NaN	NaN	NaN	NaN	NaN	NaN	NaN	NaN	NaN	NaN	NaN	NaN	NaN	NaN				21	1	1	44.6	2.6	2.6	70.19	0.00040016	79959000	0	79959000	9	14	14	14	15	12	13	10	11	12	10	10	11	9	O43663-4;O43663-2	O43663-4;O43663-2	Protein regulator of cytokinesis 1	PRC1
NaN	0.77753	0.94165	0.70303	0.67509	1.3637	NaN	NaN	NaN	0.89347	0.84637	0.63386	NaN	NaN				4	4	4	31.8	31.8	31.8	20.236	0	3683600000	1913700000	1769800000	1	2	3	2	2	2	1	1	1	1	2	3	1	3	O43665;O43665-3;O43665-2	O43665;O43665-3;O43665-2	Regulator of G-protein signaling 10	RGS10
1.0039	0.82677	0.81906	0.97101	0.67927	1.1246	0.63795	0.94314	0.79758	0.87757	0.87755	0.95665	0.96514	0.79014				7	7	7	18.4	18.4	18.4	50.75	0	94970000000	50359000000	44612000000	5	4	4	4	4	4	5	4	5	3	4	3	3	4	O43670;O43670-4;O43670-2;O43670-3	O43670;O43670-4;O43670-2;O43670-3	Zinc finger protein 207	ZNF207
1.1146	1.051	1.0475	0.86942	0.803	1.5093	0.62172	1.0563	NaN	0.97388	NaN	NaN	NaN	NaN				5	5	5	24.9	24.9	24.9	21.75	0	21030000000	12954000000	8076300000	3	4	4	4	3	3	4	3	2	2	1	2	2	2	O43674;O43674-2	O43674;O43674-2	NADH dehydrogenase [ubiquinone] 1 beta subcomplex subunit 5, mitochondrial	NDUFB5
0.95231	0.64481	0.82765	0.69734	0.6001	1.2324	0.39141	1.0544	0.63871	0.75243	0.77528	0.69556	0.70443	0.66912				3	3	3	28.6	28.6	28.6	11.402	0	20004000000	12644000000	7359500000	2	3	3	3	3	3	2	3	2	3	3	3	3	3	O43676	O43676	NADH dehydrogenase [ubiquinone] 1 beta subcomplex subunit 3	NDUFB3
1.0789	1.1334	1.128	0.95365	0.76329	1.3983	0.65016	1.1107	0.64252	0.79025	0.80186	0.75908	0.7508	0.7635				5	5	5	60.6	60.6	60.6	10.921	0	13883000000	7579700000	6303400000	5	5	4	4	5	2	5	1	2	2	2	2	2	2	O43678;O43678-2	O43678;O43678-2	NADH dehydrogenase [ubiquinone] 1 alpha subcomplex subunit 2	NDUFA2
1.0315	0.88031	0.95673	0.92304	0.64592	1.4194	0.55741	1.0577	0.70969	0.82793	0.80416	0.80414	0.76037	0.69549				15	15	15	46.8	46.8	46.8	38.792	0	106200000000	57470000000	48729000000	10	11	12	10	11	11	12	10	10	11	9	9	9	8	O43681	O43681	ATPase ASNA1	ASNA1
1.0198	1.0515	1.0034	0.90597	0.68908	1.3068	0.25195	1.0534	0.83938	0.97969	1.0993	0.86148	0.82957	0.75026				21	21	21	25	25	25	122.37	0	139970000000	73232000000	66737000000	10	12	10	11	10	12	10	11	11	6	7	10	7	8	O43683;O43683-2;O43683-3	O43683;O43683-2;O43683-3	Mitotic checkpoint serine/threonine-protein kinase BUB1	BUB1
1.035	0.95489	1.0396	0.95739	0.76648	1.3452	0.65167	1.011	0.705	0.79521	0.80328	0.77108	0.74949	0.70687				17	17	17	54	54	54	37.154	0	243530000000	131510000000	112020000000	11	14	12	13	12	13	13	11	10	12	12	10	10	11	O43684;O43684-2	O43684;O43684-2	Mitotic checkpoint protein BUB3	BUB3
NaN	NaN	NaN	NaN	NaN	NaN	NaN	NaN	NaN	NaN	NaN	NaN	NaN	NaN				2	2	2	7.6	7.6	7.6	32.573	0.0039304	433040000	184750000	248290000	0	1	1	0	0	0	0	0	0	1	0	1	0	0	O43688;O43688-3;O43688-2	O43688;O43688-3;O43688-2	Lipid phosphate phosphohydrolase 2	PPAP2C
0.98274	0.90963	0.93099	0.94591	0.7309	1.309	0.62986	1.0018	0.73908	0.8404	0.82193	0.87933	0.7869	0.77578				66	66	42	67.9	67.9	45.6	104.85	0	3340500000000	1758600000000	1581900000000	56	57	56	55	56	57	53	52	52	53	54	53	53	53	O43707;O43707-2;O43707-3	O43707;O43707-2;O43707-3	Alpha-actinin-4	ACTN4
1.0233	0.83869	0.82219	0.86707	0.72166	1.3607	NaN	NaN	NaN	NaN	NaN	NaN	NaN	0.65106				4	4	4	26.4	26.4	26.4	19.471	0	9626500000	5160000000	4466500000	2	2	2	3	2	2	2	1	1	2	2	2	1	1	O43708-3;O43708;O43708-2	O43708-3;O43708	Maleylacetoacetate isomerase	GSTZ1
0.9259	NaN	1.2857	1.0159	0.90544	NaN	0.91714	0.9659	0.80016	NaN	NaN	NaN	0.77869	NaN				5	5	5	26	26	26	31.88	0	6994200000	3707000000	3287200000	4	4	5	5	3	3	5	4	2	2	2	3	3	2	O43709;O43709-3;O43709-2	O43709;O43709-3	Uncharacterized methyltransferase WBSCR22	WBSCR22
1.1005	0.922	0.81383	0.86225	0.59166	1.2625	0.53863	1.1243	NaN	NaN	NaN	NaN	0.72871	NaN				2	2	2	35.5	35.5	35.5	8.7858	0	8131800000	4860100000	3271800000	2	2	2	2	2	2	2	2	1	2	2	2	2	2	O43715	O43715	TP53-regulated inhibitor of apoptosis 1	TRIAP1
NaN	NaN	NaN	NaN	NaN	NaN	NaN	1.079	0.69174	0.85229	0.61718	0.66715	0.70006	0.53198				4	4	4	40.4	40.4	40.4	15.086	0	18622000000	10914000000	7707700000	1	1	1	1	1	0	1	3	3	3	3	3	3	2	O43716	O43716	Glutamyl-tRNA(Gln) amidotransferase subunit C, mitochondrial	GATC
0.96557	0.87664	0.87609	0.87256	0.76178	1.191	0.56911	0.9999	0.74332	0.87204	0.91012	0.8729	0.82062	0.70674				20	20	20	35	35	35	85.852	0	59966000000	33831000000	26135000000	14	14	12	14	13	12	12	11	10	12	10	11	9	10	O43719	O43719	HIV Tat-specific factor 1	HTATSF1
NaN	NaN	NaN	NaN	NaN	NaN	NaN	NaN	NaN	NaN	NaN	NaN	NaN	NaN				4	4	2	12.8	12.8	6.5	46.348	0.00078247	875020000	510210000	364810000	0	0	0	0	1	0	1	2	2	1	2	1	1	1	O43739;O43739-2	O43739;O43739-2	Cytohesin-3	CYTH3
1.0331	1.0097	0.97257	0.94703	0.70286	1.3163	0.69248	1.0605	0.81783	0.93057	0.92284	0.79579	0.77327	0.69727				25	25	25	33.3	33.3	33.3	91.35	0	110850000000	59590000000	51256000000	16	20	19	20	18	15	17	15	15	13	12	14	14	13	O43747;O43747-2	O43747;O43747-2	AP-1 complex subunit gamma-1	AP1G1
0.90691	1.0731	1.0789	0.71804	0.75075	0.53005	0.49937	0.75651	0.57908	0.74286	0.89595	0.62002	0.78487	NaN				5	5	5	31.8	31.8	31.8	29.176	0	5069800000	2787200000	2282600000	4	4	3	3	3	4	4	4	3	4	3	3	2	3	O43752;O43752-2	O43752	Syntaxin-6	STX6
NaN	NaN	NaN	NaN	NaN	NaN	NaN	NaN	0.66785	1.1846	0.91795	1.0206	0.90458	1.2544				4	4	4	17	17	17	24.81	0	3616300000	1799000000	1817200000	1	0	1	1	0	0	0	1	2	2	2	2	2	2	O43760;O43760-2	O43760;O43760-2	Synaptogyrin-2	SYNGR2
1.078	1.1	1.0009	1.1068	0.83679	1.3853	0.63543	1.019	0.65934	0.78994	0.75143	0.87924	0.89459	0.71032				11	11	11	37.7	37.7	37.7	34.063	0	238090000000	127230000000	110850000000	9	8	9	7	10	8	7	7	6	5	7	6	7	7	O43765	O43765	Small glutamine-rich tetratricopeptide repeat-containing protein alpha	SGTA
0.94491	0.878	0.93116	0.89252	0.70185	1.1916	0.50418	0.86537	0.71585	0.71436	0.93225	0.7772	0.72145	0.68484				5	4	4	47.1	38	38	13.389	0	39218000000	21659000000	17559000000	4	3	3	3	3	4	3	3	3	2	3	3	3	3	O43768;O43768-6;O43768-5;O43768-2;O43768-9;O43768-7;O43768-3;O43768-4;O43768-8	O43768;O43768-6;O43768-5;O43768-2;O43768-9;O43768-7;O43768-3;O43768-4	Alpha-endosulfine	ENSA
1.1673	1.176	1.1459	0.92475	0.76152	1.3177	0.61419	NaN	NaN	NaN	NaN	NaN	NaN	NaN				4	4	4	14	14	14	32.943	0	24332000000	12493000000	11839000000	3	3	2	3	3	3	2	1	0	1	1	1	1	1	O43772	O43772	Mitochondrial carnitine/acylcarnitine carrier protein	SLC25A20
1.0053	0.90934	0.99528	0.98979	0.73332	1.3864	0.6544	1.0281	0.7987	0.88169	0.90496	0.96535	0.82231	0.75767				25	25	25	48.2	48.2	48.2	62.942	0	315840000000	166490000000	149350000000	17	18	18	19	19	17	18	16	19	18	17	16	17	16	O43776;O43776-2	O43776	Asparagine--tRNA ligase, cytoplasmic	NARS
0.9745	0.86482	0.91341	0.92626	0.69474	1.3084	0.55218	1.0105	0.6629	0.89082	0.79284	0.83555	0.6994	0.69291				30	30	27	31.2	31.2	28.2	131.98	0	68630000000	36870000000	31759000000	16	18	21	18	19	17	14	20	20	18	21	20	16	22	O43795;O43795-2	O43795;O43795-2	Unconventional myosin-Ib	MYO1B
NaN	NaN	NaN	NaN	NaN	NaN	NaN	NaN	NaN	NaN	NaN	NaN	NaN	NaN				3	3	3	33.6	33.6	33.6	13.596	0	8395000000	4642800000	3752300000	3	3	2	2	2	2	1	1	2	2	1	2	2	1	O43805	O43805	Sjoegren syndrome nuclear autoantigen 1	SSNA1
0.97637	0.83601	0.83111	0.78064	0.66361	NaN	0.56856	NaN	0.66137	NaN	NaN	NaN	NaN	0.68029				2	2	2	6.5	6.5	6.5	34.566	0	7542100000	4307700000	3234400000	1	1	1	1	1	1	1	1	1	1	1	1	1	2	O43808	O43808	Peroxisomal membrane protein PMP34	SLC25A17
1.0027	0.90926	0.9165	0.92911	0.69118	1.3643	0.53503	1.0229	0.6619	0.73568	0.74298	0.79957	0.75878	0.71012				10	10	10	37.9	37.9	37.9	26.227	0	178390000000	95742000000	82648000000	8	8	7	10	7	7	7	7	6	7	6	6	7	7	O43809	O43809	Cleavage and polyadenylation specificity factor subunit 5	NUDT21
1.057	0.93401	1.1194	1.0316	0.75022	1.4834	0.66068	1.0608	0.78235	0.86616	0.79969	0.86479	0.75303	0.77965				15	15	15	32.1	32.1	32.1	45.283	0	109320000000	61559000000	47759000000	12	12	13	13	15	12	12	11	10	10	8	11	10	11	O43813	O43813	LanC-like protein 1	LANCL1
0.98977	0.91778	0.83751	0.90856	0.67134	1.3209	0.66396	0.94614	0.62746	0.58939	1.0271	0.65537	0.71153	0.65583				18	18	17	36.2	36.2	35.3	86.131	0	16789000000	9702000000	7086500000	9	9	8	9	8	9	9	7	9	8	8	8	3	9	O43815;O43815-2	O43815;O43815-2	Striatin	STRN
1.058	1.5264	1.3089	1.3845	1.0816	1.6418	0.87649	1.0044	0.82459	0.88491	0.83701	0.86111	0.6793	0.75246				8	8	8	17.7	17.7	17.7	51.84	0	13078000000	6222000000	6856200000	4	4	3	3	3	6	3	3	4	3	5	3	4	3	O43818	O43818	U3 small nucleolar RNA-interacting protein 2	RRP9
1.1935	0.98334	0.9889	0.8933	0.85008	1.229	0.51679	1.0232	0.58111	0.91256	1.0047	0.8665	0.71085	0.8787				7	7	7	34.2	34.2	34.2	29.81	0	17927000000	9774500000	8152600000	3	3	3	4	2	3	3	6	7	7	5	6	7	5	O43819	O43819	Protein SCO2 homolog, mitochondrial	SCO2
1.02	0.97443	1.0007	0.99449	0.81284	1.4373	0.50865	1.0379	0.86992	0.84744	0.84291	0.87536	0.69605	0.7476				13	13	13	28.8	28.8	28.8	76.107	0	24537000000	13037000000	11500000000	9	8	7	8	7	8	9	6	9	7	9	7	6	5	O43823	O43823	A-kinase anchor protein 8	AKAP8
NaN	NaN	NaN	NaN	NaN	NaN	NaN	1.1747	0.64698	0.79728	NaN	0.73116	0.76249	NaN				5	5	5	15.5	15.5	15.5	56.883	0	1984300000	1223400000	760840000	0	0	1	0	0	0	0	3	3	2	1	2	2	4	O43824	O43824	Putative GTP-binding protein 6	GTPBP6
1.0131	0.81881	0.9338	0.8938	0.66391	1.1391	0.50192	1.0322	0.7411	0.81946	0.87133	0.82156	0.74505	0.70424				16	16	16	49.6	49.6	49.6	42.183	0	76962000000	41497000000	35466000000	12	12	11	12	10	10	11	12	12	11	12	12	12	13	O43837;O43837-2;O43837-3	O43837;O43837-2	Isocitrate dehydrogenase [NAD] subunit beta, mitochondrial	IDH3B
1.0006	0.90897	0.93818	0.94843	0.70463	1.2324	0.5998	1.0355	0.71476	0.72391	0.75125	0.82601	0.73466	0.69185				26	26	26	25.4	25.4	25.4	131.57	0	118560000000	65075000000	53482000000	16	17	18	18	18	15	18	17	15	16	19	18	16	18	O43847;O43847-2	O43847;O43847-2	Nardilysin	NRD1
0.96589	0.81976	0.88898	0.8703	0.68476	1.248	0.69547	0.98925	0.75339	0.80724	0.7637	0.83538	0.77637	0.71653				18	18	4	60.3	60.3	12.1	37.106	0	568050000000	313880000000	254170000000	14	15	14	16	15	15	16	15	16	15	16	16	13	15	O43852;O43852-3;O43852-6;O43852-5;O43852-10;O43852-9;O43852-11;O43852-13;O43852-14	O43852;O43852-3;O43852-6;O43852-5;O43852-10	Calumenin	CALU
1.0604	0.85392	0.83491	0.83957	0.69146	1.2737	0.53341	1.0334	0.6492	0.80855	0.75808	0.75494	0.87576	0.725				17	3	3	52.9	5.9	5.9	38.078	0	21578000000	11835000000	9743300000	14	14	14	15	15	14	15	14	15	14	15	15	12	14	O43852-4;O43852-2;O43852-15;O43852-8;O43852-7;O43852-12	O43852-4;O43852-2;O43852-15;O43852-8	Calumenin	CALU
0.98506	0.97578	1.0299	1.0031	0.77902	1.3909	0.62924	0.96772	0.81723	0.86294	0.82627	0.92885	0.79807	0.74948				22	22	12	48.3	48.3	30.4	58.951	0	152010000000	83155000000	68858000000	15	14	16	16	15	14	17	12	9	13	13	14	13	14	O43865;O43865-2	O43865;O43865-2	Putative adenosylhomocysteinase 2	AHCYL1
NaN	0.93787	0.51149	NaN	0.6781	NaN	0.49415	NaN	NaN	NaN	NaN	NaN	NaN	NaN				7	7	7	9.6	9.6	9.6	122.95	0	934200000	572980000	361210000	2	3	2	2	2	2	2	1	1	2	0	3	0	0	O43896	O43896	Kinesin-like protein KIF1C	KIF1C
1.0366	0.90168	0.89084	0.79858	0.61113	NaN	NaN	1.313	NaN	0.9768	0.86171	0.89886	0.72841	0.78261				6	6	6	17	17	17	50.282	0	5578900000	3050800000	2528100000	3	3	2	2	2	2	2	2	1	2	2	2	2	3	O43913;O43913-2	O43913;O43913-2	Origin recognition complex subunit 5	ORC5
1.0183	NaN	NaN	0.87068	0.75163	0.92723	0.57227	NaN	0.86915	NaN	0.88616	NaN	NaN	NaN				3	3	3	33	33	33	12.517	0	9942400000	5854300000	4088100000	2	2	1	2	2	2	2	1	2	1	2	1	1	1	O43920	O43920	NADH dehydrogenase [ubiquinone] iron-sulfur protein 5	NDUFS5
NaN	NaN	NaN	NaN	NaN	NaN	NaN	NaN	NaN	NaN	NaN	NaN	NaN	NaN				3	3	3	22.7	22.7	22.7	17.42	0	1182200000	687030000	495200000	1	0	0	1	0	0	0	1	1	1	1	1	1	1	O43924	O43924	Retinal rod rhodopsin-sensitive cGMP 3,5-cyclic phosphodiesterase subunit delta	PDE6D
1.0604	1.0039	1.0255	0.7914	0.7561	1.3079	0.42573	1.067	0.53687	NaN	0.84681	0.97054	0.73018	0.68459				9	9	9	24.8	24.8	24.8	50.377	0	6806800000	3727400000	3079400000	4	3	3	3	2	4	2	4	4	3	6	3	4	3	O43929;O43929-2;O43929-3;CON__Q2YDI2;Q96NJ5;Q96NJ5-3;Q96NJ5-2	O43929;O43929-2;O43929-3	Origin recognition complex subunit 4	ORC4
0.99504	0.85432	0.90853	0.93944	0.6941	1.2771	0.58152	0.98689	0.72942	0.85944	0.78182	0.82768	0.76172	0.75511				19	19	19	37.1	37.1	37.1	71.689	0	61336000000	32439000000	28897000000	14	13	14	15	14	12	13	13	15	15	14	15	14	15	O60216;Q9H4I0;Q9H4I0-2	O60216	Double-strand-break repair protein rad21 homolog	RAD21
0.97369	0.89156	0.91179	0.86	0.72586	1.1207	0.45843	1.0258	0.47583	0.73372	0.59784	0.76608	0.76302	0.74528				4	4	4	55.7	55.7	55.7	10.998	0	32117000000	18375000000	13742000000	3	4	4	4	4	2	3	4	4	3	4	3	3	3	O60220	O60220	Mitochondrial import inner membrane translocase subunit Tim8 A	TIMM8A
NaN	0.98972	1.0324	0.95756	0.8975	1.7784	0.62233	NaN	0.68151	0.83532	0.84025	NaN	0.78042	0.78989				5	4	4	2	1.7	1.7	340.17	0.0015308	27332000000	15032000000	12299000000	1	3	2	1	2	2	2	1	2	2	2	1	2	3	O60229;O60229-2;O60229-3;O60229-6;O60229-4	O60229;O60229-2;O60229-3	Kalirin	KALRN
0.5867	1.1636	0.98738	1.0989	0.79856	1.3592	0.52104	1.1064	0.76544	0.91051	0.97611	0.88316	0.9717	0.85675				20	19	19	25.1	24.2	24.2	119.26	0	24187000000	12258000000	11930000000	5	11	9	12	10	10	10	10	12	12	12	13	12	13	O60231	O60231	Putative pre-mRNA-splicing factor ATP-dependent RNA helicase DHX16	DHX16
0.83866	1.155	1.106	1.0565	0.74523	1.4877	0.84589	1.035	0.90145	0.95134	NaN	NaN	0.95676	0.97838				7	7	7	62.8	62.8	62.8	21.474	0	16342000000	8739900000	7602400000	5	5	5	5	6	4	5	4	4	2	2	3	3	4	O60232	O60232	Sjoegren syndrome/scleroderma autoantigen 1	SSSCA1
1.6434	NaN	NaN	NaN	NaN	NaN	NaN	0.83579	0.349	0.74842	0.71766	0.77029	0.67635	0.70876				5	5	5	4.5	4.5	4.5	160.6	0.00020292	8354400000	5385300000	2969200000	1	2	1	0	0	2	0	3	2	2	2	2	3	2	O60244	O60244	Mediator of RNA polymerase II transcription subunit 14	MED14
NaN	NaN	NaN	NaN	NaN	NaN	NaN	NaN	NaN	NaN	NaN	NaN	NaN	NaN				3	3	3	4.3	4.3	4.3	116.07	0	462260000	295040000	167210000	1	2	2	2	1	2	0	1	1	1	1	0	1	1	O60245;O60245-2	O60245;O60245-2	Protocadherin-7	PCDH7
0.97211	0.97244	0.99824	0.89018	0.78939	1.3907	0.6782	0.97621	0.80473	0.80864	0.79479	1.1441	0.80202	1.0371				14	14	12	51.5	51.5	45.8	40.925	0	37474000000	20731000000	16742000000	9	10	10	7	7	7	8	6	7	5	5	9	7	8	O60256;O60256-3;O60256-2;O60256-4	O60256;O60256-3;O60256-2;O60256-4	Phosphoribosyl pyrophosphate synthase-associated protein 2	PRPSAP2
1.0281	1.051	0.98061	0.78714	0.73676	1.3723	0.62632	1.0079	0.71175	0.82493	0.9006	0.86915	0.8379	0.77763				56	56	56	48.7	48.7	48.7	121.9	0	266270000000	141690000000	124580000000	39	42	39	41	47	36	34	40	34	28	29	30	29	31	O60264;P28370;P28370-2	O60264	SWI/SNF-related matrix-associated actin-dependent regulator of chromatin subfamily A member 5	SMARCA5
0.93356	0.89784	0.86594	0.98613	0.75748	1.3108	0.59647	0.97454	0.72333	0.80528	0.82405	0.80941	0.80961	0.72061				29	29	29	27.6	27.6	27.6	146.2	0	39415000000	20624000000	18791000000	18	17	20	21	22	16	19	14	12	11	13	11	11	12	O60271;O60271-2;O60271-4;O60271-9;O60271-5;O60271-3;Q9UPT6;Q9UPT6-2	O60271;O60271-2;O60271-4;O60271-9;O60271-5;O60271-3	C-Jun-amino-terminal kinase-interacting protein 4	SPAG9
NaN	NaN	NaN	NaN	NaN	NaN	NaN	NaN	NaN	NaN	NaN	NaN	NaN	NaN	+			15	2	2	16.5	1.7	1.7	109.49	1	1404600000	677730000	726860000	7	10	11	9	9	10	9	9	6	8	8	7	8	9	O60282;O60282-2	O60282;O60282-2	Kinesin heavy chain isoform 5C	KIF5C
1.043	0.99243	0.9857	1.1113	0.7845	1.2944	0.60648	1.014	0.66608	0.81241	0.8907	0.83958	0.81921	0.81387				25	25	25	14.8	14.8	14.8	254.39	0	25433000000	13392000000	12041000000	11	6	12	9	11	8	8	12	9	10	8	9	9	9	O60287	O60287	Nucleolar pre-ribosomal-associated protein 1	URB1
NaN	NaN	NaN	NaN	NaN	NaN	NaN	1.293	NaN	NaN	NaN	NaN	NaN	NaN				2	2	2	4.2	4.2	4.2	75.601	0.0092626	4656500000	2245600000	2410800000	0	0	1	1	0	0	0	2	0	0	1	1	1	0	O60294	O60294	Leucine carboxyl methyltransferase 2	LCMT2
1.1093	0.8277	0.96973	0.87734	0.87113	1.263	0.61258	0.99557	0.67602	1.0052	1.0738	1.0444	0.95775	0.77506				25	25	25	22.5	22.5	22.5	171.29	0	23724000000	14101000000	9623500000	8	9	10	10	11	11	9	9	12	8	7	7	7	13	O60306	O60306	Intron-binding protein aquarius	AQR
NaN	NaN	NaN	NaN	NaN	NaN	NaN	NaN	NaN	NaN	NaN	NaN	NaN	NaN				3	2	2	1.9	1.3	1.3	143.14	0.0039355	1786800000	867800000	919000000	2	2	1	2	2	1	1	2	1	2	1	1	1	1	O60307	O60307	Microtubule-associated serine/threonine-protein kinase 3	MAST3
1.007	0.91462	0.8553	0.88736	0.66113	1.1939	0.57801	0.93142	0.72937	0.83484	0.77218	0.8828	0.79836	0.77887				31	31	31	32.7	32.7	32.7	115.88	0	44624000000	24225000000	20399000000	16	15	16	16	14	16	14	17	14	16	18	16	18	14	O60313-2;O60313	O60313-2;O60313	Dynamin-like 120 kDa protein, mitochondrial;Dynamin-like 120 kDa protein, form S1	OPA1
1.0553	0.95509	0.96371	1.0627	0.67872	1.1617	0.63948	1.0624	0.63585	0.80621	0.82231	0.81316	0.70716	0.83273				22	22	22	34.7	34.7	34.7	92.902	0	48646000000	27244000000	21402000000	13	13	12	14	13	10	11	13	17	12	10	11	12	13	O60341;O60341-2	O60341;O60341-2	Lysine-specific histone demethylase 1A	KDM1A
NaN	0.99133	0.8865	NaN	NaN	NaN	NaN	1.5518	0.88214	NaN	NaN	NaN	NaN	0.89009				6	6	6	7.2	7.2	7.2	146.56	0	2050800000	990590000	1060300000	1	2	3	0	0	2	1	3	3	3	2	1	3	3	O60343;O60343-2;O60343-3;O60343-4;O60343-5	O60343;O60343-2;O60343-3	TBC1 domain family member 4	TBC1D4
NaN	NaN	1.0297	1.0052	0.6589	1.2584	0.61557	0.94125	NaN	NaN	NaN	NaN	NaN	NaN				4	4	4	18.4	18.4	18.4	28.306	0	6428900000	3508900000	2919900000	1	1	2	2	2	3	2	2	1	1	1	2	1	0	O60344-4;O60344	O60344-4;O60344	Endothelin-converting enzyme 2;Methyltransferase-like region;Endothelin-converting enzyme 2 region	ECE2
0.82915	0.7311	0.80793	0.85857	0.56779	1.0035	0.53734	NaN	NaN	0.84874	0.98056	NaN	0.70749	NaN				10	1	1	54.7	7.3	7.3	15.529	0.0022796	37445000000	16706000000	20739000000	9	10	10	10	10	10	10	9	9	9	9	9	10	8	O60361	O60361	Putative nucleoside diphosphate kinase	NME2P1
NaN	NaN	0.73279	NaN	0.80248	NaN	NaN	NaN	NaN	NaN	NaN	NaN	NaN	NaN				3	3	3	11.7	11.7	11.7	51.964	0	1268400000	698940000	569430000	1	2	2	2	2	1	1	1	0	1	1	1	0	1	O60427;O60427-2	O60427	Fatty acid desaturase 1	FADS1
1.0719	0.90284	1.0156	1.0433	0.72397	1.3197	0.61852	1.0233	0.67197	0.88337	0.78008	0.83283	0.72857	0.75702				11	11	11	28.4	28.4	28.4	54.554	0	33795000000	17952000000	15843000000	10	7	8	8	8	9	7	8	8	9	7	8	8	8	O60443;O60443-3;O60443-2	O60443	Non-syndromic hearing impairment protein 5	DFNA5
1.0351	0.8586	0.90005	0.88774	0.68825	1.2943	0.551	1.0345	0.72312	0.75492	0.7859	0.8487	0.74734	0.72409				25	23	23	47.1	45.6	45.6	79.187	0	78067000000	42996000000	35072000000	17	18	16	19	16	15	19	17	18	16	14	16	15	18	O60488;O60488-2	O60488;O60488-2	Long-chain-fatty-acid--CoA ligase 4	ACSL4
1.0043	0.94499	1.1255	1.017	0.82462	1.4919	0.57329	1.0647	0.65981	0.72517	0.72206	0.76605	0.69126	0.65263				12	12	10	62.3	62.3	52.5	18.762	0	77492000000	40752000000	36740000000	8	9	10	10	10	9	10	10	9	9	9	10	6	9	O60493;O60493-4;O60493-2;O60493-3	O60493;O60493-4;O60493-2;O60493-3	Sorting nexin-3	SNX3
1.044	0.88661	0.8324	0.87132	0.66549	1.2731	0.61998	0.99115	0.71634	0.84331	0.76295	0.70407	1.2502	0.73392				18	18	18	24.9	24.9	24.9	102.91	0	19770000000	10736000000	9033900000	10	9	12	9	10	11	9	7	8	7	9	8	7	6	O60502;O60502-4;O60502-2;O60502-3	O60502;O60502-4;O60502-2;O60502-3	Bifunctional protein NCOAT;Protein O-GlcNAcase;Histone acetyltransferase	MGEA5
NaN	NaN	NaN	NaN	NaN	1.588	NaN	1.1604	NaN	0.74137	0.75016	0.71784	0.93276	0.85825				4	4	4	4.2	4.2	4.2	150.7	0	8430600000	4686100000	3744400000	0	3	2	1	1	1	1	2	1	1	2	1	2	2	O60503	O60503	Adenylate cyclase type 9	ADCY9
0.90319	NaN	1.1539	1.0125	0.86855	NaN	0.71868	NaN	NaN	NaN	NaN	0.78792	NaN	NaN				5	5	5	11	11	11	75.34	0	10315000000	5591900000	4723400000	2	1	2	3	2	0	3	0	1	1	1	2	2	1	O60504;O60504-2	O60504;O60504-2	Vinexin	SORBS3
0.95972	0.93091	1.0147	0.91308	0.73109	1.3792	0.71953	1.0143	0.78282	0.92063	0.92291	0.95472	0.79639	0.87235				30	21	2	58.1	47.5	7.2	69.602	0	456070000000	234430000000	221640000000	25	25	27	25	24	25	25	23	24	24	24	25	23	24	O60506;O60506-2	O60506;O60506-2	Heterogeneous nuclear ribonucleoprotein Q	SYNCRIP
NaN	NaN	NaN	NaN	NaN	NaN	NaN	NaN	0.65169	0.76592	0.7786	0.75887	0.70409	0.67562				28	1	1	56.4	1.8	1.8	62.656	0.0005902	8199400000	4639000000	3560500000	23	23	25	23	22	23	23	22	23	23	23	24	22	24	O60506-3;O60506-4;O60506-5	O60506-3;O60506-4;O60506-5	Heterogeneous nuclear ribonucleoprotein Q	SYNCRIP
0.98711	0.92912	1.019	0.86568	0.58462	1.2163	0.62529	NaN	0.80206	NaN	NaN	0.91535	NaN	0.79365				7	7	7	16.4	16.4	16.4	65.521	0	4649400000	2493900000	2155400000	3	4	4	3	4	3	3	3	3	3	2	2	1	2	O60508	O60508	Pre-mRNA-processing factor 17	CDC40
NaN	NaN	NaN	NaN	NaN	NaN	NaN	NaN	NaN	NaN	NaN	NaN	NaN	NaN				2	2	2	8.1	8.1	8.1	40.041	0.0076951	0	0	0	0	0	0	0	0	1	0	1	0	0	0	0	0	0	O60513	O60513	Beta-1,4-galactosyltransferase 4;N-acetyllactosamine synthase;Lactotriaosylceramide beta-1,4-galactosyltransferase	B4GALT4
NaN	NaN	NaN	NaN	NaN	NaN	NaN	0.86681	0.85891	0.97944	1.0767	1.1706	1.1473	0.74988				8	5	5	8	5.7	5.7	124.71	0.00040072	17650000000	9046200000	8604000000	4	3	3	4	3	4	4	5	5	5	4	4	4	4	O60518	O60518	Ran-binding protein 6	RANBP6
0.87804	1.113	1.0279	0.81973	0.85296	1.5585	0.5155	1.0622	0.8014	0.9871	0.81839	1.0085	1.064	0.87065				16	16	16	17	17	17	122.95	0	14247000000	7113600000	7133100000	7	8	9	6	7	8	6	4	6	6	7	8	5	6	O60524;O60524-4;O60524-3;O60524-5;O60524-2	O60524;O60524-4;O60524-3;O60524-5	Nuclear export mediator factor NEMF	NEMF
0.99855	1.0172	0.98368	0.99241	0.73172	1.2904	0.58422	0.96933	0.76798	0.87547	0.82334	0.96617	0.70326	0.70969				14	14	14	40.9	40.9	40.9	41.949	0	151220000000	76850000000	74370000000	11	10	11	14	11	12	10	7	9	8	9	9	9	10	O60547;O60547-2	O60547;O60547-2	GDP-mannose 4,6 dehydratase	GMDS
1.0468	0.87401	0.94379	0.82768	0.81236	1.2369	1.1454	1.1478	0.84609	NaN	NaN	0.84581	NaN	NaN				7	7	7	15.4	15.4	15.4	80.684	0	9278600000	5467000000	3811500000	4	4	4	4	5	5	4	2	4	2	2	3	2	2	O60563;O60563-2;O60583;O60583-2	O60563	Cyclin-T1	CCNT1
1.114	1.1463	NaN	0.69564	0.55213	0.9771	0.67855	1.0136	0.7287	0.7765	0.71556	0.71495	0.5394	0.53509				24	24	24	29.4	29.4	29.4	119.54	0	39964000000	22814000000	17150000000	8	7	12	8	6	8	10	11	11	10	10	12	10	13	O60566;O60566-3;O60566-2	O60566;O60566-3;O60566-2	Mitotic checkpoint serine/threonine-protein kinase BUB1 beta	BUB1B
0.92589	1.062	1.028	0.89924	0.81334	1.4178	0.67861	1.0222	0.67939	0.8349	0.80817	0.82343	0.76497	0.73861				23	23	23	32.1	32.1	32.1	84.784	0	69064000000	37542000000	31522000000	17	19	15	17	16	17	16	15	13	10	12	11	9	14	O60568	O60568	Procollagen-lysine,2-oxoglutarate 5-dioxygenase 3	PLOD3
0.92183	1.0167	0.74053	0.94069	0.97759	1.5061	0.58001	1.1261	1.0401	0.96953	1.076	1.3735	NaN	0.96522				6	6	6	25.3	25.3	25.3	28.362	0	5507700000	2916100000	2591600000	3	2	4	3	5	3	4	5	5	3	3	4	3	5	O60573;O60573-2	O60573;O60573-2	Eukaryotic translation initiation factor 4E type 2	EIF4E2
1.0115	0.90415	0.95286	0.94549	0.69189	1.239	0.58854	1.0197	0.81775	0.83154	0.79045	0.92077	0.80012	0.76721				33	33	33	30.5	30.5	30.5	141.35	0	95019000000	49308000000	45711000000	23	25	22	25	24	24	22	20	21	22	24	24	21	23	O60610;O60610-2;O60610-3	O60610;O60610-2;O60610-3	Protein diaphanous homolog 1	DIAPH1
1.3418	1.1358	0.9094	NaN	NaN	NaN	NaN	0.99695	0.77755	0.86511	0.76525	0.7218	0.76454	0.75284				4	4	4	32.7	32.7	32.7	17.79	0	4582700000	2261100000	2321600000	2	2	3	2	1	3	2	3	2	1	2	2	3	2	O60613;O60613-2	O60613	15 kDa selenoprotein	2015-09-01
0.93579	0.8747	1.0966	0.97499	0.67734	1.1606	0.48986	0.98321	0.74089	0.76979	NaN	0.82561	0.79544	0.95295				10	10	10	18	18	18	86.844	0	2600300000	1394500000	1205800000	4	4	5	4	4	3	3	2	4	3	1	4	3	2	O60645;O60645-2;O60645-3	O60645;O60645-2;O60645-3	Exocyst complex component 3	EXOC3
1.0271	1.0077	1.0015	0.96191	0.74977	1.3759	0.60606	1.0635	0.71726	0.8323	0.82651	0.84927	0.77186	0.77999				20	20	20	62.4	62.4	62.4	47.074	0	650870000000	353020000000	297850000000	18	19	19	18	19	19	16	16	15	14	17	15	15	15	O60664;O60664-4;O60664-3;O60664-2	O60664;O60664-4;O60664-3	Perilipin-3	PLIN3
1.1756	NaN	1.0454	1.0686	NaN	1.3978	0.7131	1.2078	0.8175	NaN	0.72528	1.0043	0.95821	NaN				4	4	4	22.7	22.7	22.7	31.827	0	7592800000	4080900000	3511900000	2	2	3	3	3	3	3	2	2	1	3	2	2	1	O60671;O60671-2	O60671;O60671-2	Cell cycle checkpoint protein RAD1	RAD1
NaN	NaN	NaN	NaN	NaN	NaN	NaN	NaN	NaN	NaN	NaN	NaN	NaN	NaN				3	3	3	24.4	24.4	24.4	17.523	0	6520400000	3178900000	3341500000	0	1	0	1	0	1	1	0	1	2	0	0	0	0	O60675;O15525	O60675	Transcription factor MafK	MAFK
1.024	0.91692	0.94947	0.95157	0.78982	1.3973	0.68124	1.1108	0.71111	0.80217	0.71619	0.79961	0.87423	0.64571				14	14	14	30.9	30.9	30.9	59.875	0	11297000000	5523700000	5773200000	4	6	6	8	6	5	6	7	6	4	7	6	4	6	O60678;O60678-2	O60678;O60678-2	Protein arginine N-methyltransferase 3	PRMT3
0.98888	0.98867	0.97339	0.93111	0.71464	1.2988	0.65954	0.99463	0.77367	0.88006	0.79672	0.89608	0.87218	0.76893				18	18	9	33.2	33.2	15.3	60.029	0	181990000000	97921000000	84073000000	12	12	14	15	13	13	13	13	14	13	15	14	13	14	O60684	O60684	Importin subunit alpha-7	KPNA6
1.0414	0.89654	1.0109	0.88331	0.71725	1.2844	0.5431	0.97235	0.71436	0.82033	0.74973	0.83853	0.76316	0.72988				20	20	20	52.6	52.6	52.6	55.023	0	155800000000	83366000000	72437000000	17	16	16	16	18	17	16	17	16	15	14	14	12	15	O60701;O60701-2;O60701-3	O60701;O60701-2;O60701-3	UDP-glucose 6-dehydrogenase	UGDH
1.0311	0.92989	1.0064	0.94758	0.74899	1.3707	0.62685	1.0411	0.74068	0.83924	0.84306	0.8832	0.72449	0.73926				32	32	32	45.4	45.4	45.4	104.98	0	89068000000	48350000000	40717000000	19	20	24	21	22	20	21	21	23	20	18	21	18	20	O60716-3;O60716-5;O60716;O60716-21;O60716-19;O60716-13;O60716-11;O60716-2;O60716-18;O60716-17;O60716-10;O60716-8;O60716-9;O60716-7;O60716-4;O60716-24;O60716-23;O60716-16;O60716-15;O60716-6;O60716-22;O60716-20;O60716-14;O60716-12;O60716-29;O60716-27;O60716-26;O60716-25;O60716-32;O60716-31;O60716-30;O60716-28	O60716-3;O60716-5;O60716;O60716-21;O60716-19;O60716-13;O60716-11;O60716-2;O60716-18;O60716-17;O60716-10;O60716-8;O60716-9;O60716-7;O60716-4;O60716-24;O60716-23;O60716-16;O60716-15;O60716-6;O60716-22;O60716-20;O60716-14;O60716-12;O60716-29;O60716-27;O60716-26;O60716-25;O60716-32;O60716-31;O60716-30;O60716-28	Catenin delta-1	CTNND1
NaN	NaN	NaN	NaN	NaN	NaN	NaN	NaN	NaN	NaN	NaN	NaN	NaN	NaN				2	2	2	9.9	9.9	9.9	31.938	0	791280000	419740000	371540000	0	0	0	0	0	0	0	1	1	0	1	0	0	1	O60725	O60725	Protein-S-isoprenylcysteine O-methyltransferase	ICMT
0.99287	0.96708	0.87214	0.96931	0.73669	1.3067	0.51698	0.99852	0.72532	0.73911	0.75822	0.83783	0.71421	0.70615				22	22	20	45.1	45.1	41	58.47	0	131690000000	72630000000	59059000000	16	17	17	16	15	18	17	17	19	16	16	18	15	16	O60749;O60749-2	O60749;O60749-2	Sorting nexin-2	SNX2
1.0454	0.88258	0.90612	0.75915	0.67706	1.3941	0.58225	0.99532	0.67697	0.80581	0.83187	0.76931	0.77169	0.76628				11	11	11	35.4	35.4	35.4	29.634	0	71509000000	39025000000	32485000000	6	7	7	7	7	7	7	7	7	7	7	7	6	8	O60762	O60762	Dolichol-phosphate mannosyltransferase	DPM1
1.0122	0.92411	0.96425	0.91641	0.70073	1.2113	0.61888	1.0119	0.72454	0.84772	0.86089	0.90374	0.78663	0.7553				34	34	33	39.3	39.3	38.6	107.89	0	126660000000	67134000000	59523000000	21	21	20	20	20	19	21	19	18	17	16	15	14	17	O60763;O60763-2;REV__Q5VZ89-5	O60763;O60763-2	General vesicular transport factor p115	USO1
0.98012	1.0021	1.0513	0.85195	0.70377	1.4619	0.52509	NaN	NaN	NaN	NaN	NaN	NaN	NaN				4	4	4	30.5	30.5	30.5	15.139	0	4425100000	2252400000	2172600000	2	4	3	3	3	2	3	1	1	1	1	1	1	1	O60783	O60783	28S ribosomal protein S14, mitochondrial	MRPS14
NaN	0.88271	NaN	NaN	NaN	NaN	NaN	NaN	NaN	NaN	NaN	NaN	NaN	NaN				4	4	4	13.4	13.4	13.4	53.818	0	1709300000	949240000	760020000	1	3	3	1	1	0	2	2	1	1	2	2	1	2	O60784;O60784-3;O60784-4;O60784-2	O60784;O60784-3;O60784-4;O60784-2	Target of Myb protein 1	TOM1
1.0047	0.87095	0.89736	0.86085	0.674	1.148	0.50962	1.0478	0.60302	0.79889	0.78749	0.78462	0.75454	0.69526				11	11	0	59.5	59.5	0	13.922	0	10893000000000	6134200000000	4758600000000	8	9	8	9	9	8	8	7	7	6	7	8	7	7	Q99877;Q93079;P58876;O60814;Q99879;Q5QNW6;P62807;Q5QNW6-2;P57053	Q99877;Q93079;P58876;O60814;Q99879;Q5QNW6;P62807;Q5QNW6-2;P57053	Histone H2B type 1-N;Histone H2B type 1-H;Histone H2B type 1-D;Histone H2B type 1-K;Histone H2B type 1-M;Histone H2B type 2-F;Histone H2B type 1-C/E/F/G/I;Histone H2B type F-S	HIST1H2BN;HIST1H2BH;HIST1H2BD;HIST1H2BK;HIST1H2BM;HIST2H2BF;HIST1H2BC;H2BFS
0.96188	0.84681	1.1565	1.0528	0.66541	1.135	0.62009	1.1207	0.81946	0.89466	0.80687	0.84806	0.79074	0.79422				18	18	14	36.2	36.2	28.7	58.476	0	28649000000	15933000000	12716000000	8	10	8	12	8	7	11	12	13	11	10	11	9	11	O60825;O60825-2;P16118;P16118-2	O60825;O60825-2	6-phosphofructo-2-kinase/fructose-2,6-bisphosphatase 2;6-phosphofructo-2-kinase;Fructose-2,6-bisphosphatase	PFKFB2
NaN	NaN	0.8457	NaN	0.68833	NaN	0.47394	0.89476	NaN	0.79145	NaN	0.86507	0.93016	0.80678				13	13	13	26.2	26.2	26.2	70.755	0	3268900000	1941900000	1327000000	2	3	4	1	2	3	3	4	3	4	4	5	4	7	O60826	O60826	Coiled-coil domain-containing protein 22	CCDC22
1.1322	1.7409	1.0086	1.4323	1.8267	3.2692	1.1616	0.99728	1.0379	1.2864	1.5401	1.8288	0.69288	1.2729				8	8	8	36.6	36.6	36.6	30.472	0	25754000000	11088000000	14666000000	4	5	5	4	5	4	6	3	5	4	4	3	4	5	O60828;O60828-5;O60828-2;O60828-4;O60828-3;O60828-10;O60828-9;O60828-8;O60828-7;O60828-6	O60828;O60828-5;O60828-2;O60828-4;O60828-3	Polyglutamine-binding protein 1	PQBP1
NaN	NaN	NaN	NaN	NaN	NaN	NaN	0.79853	0.6197	0.67829	NaN	NaN	NaN	0.69843				6	6	5	35.1	35.1	29.7	23.823	0	3208900000	1923900000	1285000000	1	1	1	0	1	2	2	2	3	2	1	2	2	2	O60830-2;O60830	O60830-2;O60830	Mitochondrial import inner membrane translocase subunit Tim17-B	TIMM17B
1.0209	0.88731	0.97167	0.94103	0.79716	1.2557	0.59467	0.96742	0.80511	0.8745	0.84187	0.89885	0.79551	0.7373				20	20	20	42	42	42	57.673	0	136000000000	74552000000	61446000000	14	15	15	14	15	15	16	13	14	13	15	14	14	13	O60832;O60832-2	O60832;O60832-2	H/ACA ribonucleoprotein complex subunit 4	DKC1
1.0253	0.95494	0.91482	0.93507	0.73442	1.2491	0.61814	1.0581	0.7387	0.79897	0.85596	0.78801	0.76933	0.74295				45	45	45	39.6	39.6	39.6	138.83	0	330880000000	176590000000	154290000000	28	33	29	30	31	29	29	26	28	29	27	26	25	25	O60841	O60841	Eukaryotic translation initiation factor 5B	EIF5B
1.072	0.99869	0.99618	0.90036	0.78618	1.3249	0.51553	1.1222	0.63539	0.72294	0.7531	0.76304	0.70932	0.6652				8	8	8	50.7	50.7	50.7	16.368	0	82065000000	45274000000	36790000000	4	3	4	4	5	3	4	3	3	3	3	6	3	3	O60869;O60869-2;O60869-3	O60869;O60869-2;O60869-3	Endothelial differentiation-related factor 1	EDF1
NaN	0.67575	0.79325	0.82233	NaN	2.0375	0.47628	NaN	0.81225	0.99575	0.80947	0.82579	0.86456	0.82701				4	4	4	11.7	11.7	11.7	45.373	0	1458500000	769010000	689540000	1	2	2	3	3	1	2	2	2	1	1	2	2	2	O60870;O60870-2	O60870;O60870-2	DNA/RNA-binding protein KIN17	KIN
1.0348	0.90788	0.90004	0.93295	0.7154	1.3963	0.64764	1.0764	0.68956	0.75602	0.78727	0.78322	0.96398	0.74436				16	16	16	38.6	38.6	38.6	45.745	0	134280000000	73590000000	60691000000	15	15	15	14	14	13	13	11	11	12	10	11	9	10	O60884	O60884	DnaJ homolog subfamily A member 2	DNAJA2
0.90927	1.0899	1.0423	0.94223	0.68942	1.24	0.66027	1.1183	0.71361	0.92433	0.75097	0.82033	1.1366	0.60314				19	19	13	17	17	12.6	152.22	0	19193000000	10260000000	8932500000	9	11	7	7	7	9	7	5	7	5	6	5	5	5	O60885;O60885-2;O60885-3	O60885;O60885-2;O60885-3	Bromodomain-containing protein 4	BRD4
0.88981	0.99766	1.088	1.0885	0.97918	1.4049	0.61838	1.0519	0.73707	0.73611	0.76561	0.69535	0.96199	NaN				4	4	4	33	33	33	19.116	0	29614000000	16491000000	13122000000	2	2	3	3	2	3	3	2	3	2	2	2	2	1	O60888;O60888-3;O60888-2	O60888;O60888-3;O60888-2	Protein CutA	CUTA
1.085	0.98665	1.0196	0.87001	0.82531	1.2901	0.55379	NaN	NaN	NaN	0.85728	0.95045	0.80821	0.72401				5	5	5	18.2	18.2	18.2	31.691	0	8501800000	4476900000	4024900000	3	3	3	4	2	3	5	2	3	3	2	3	3	3	O60921;O60921-2	O60921;O60921-2	Checkpoint protein HUS1	HUS1
0.98155	0.83451	0.88532	0.89528	0.70536	1.1782	0.44876	0.97985	0.67739	0.72993	0.84324	0.78546	0.70159	0.65775				5	5	5	31.1	31.1	31.1	14.21	0	63928000000	34167000000	29761000000	4	4	4	4	4	4	4	3	3	2	3	3	3	3	O60925	O60925	Prefoldin subunit 1	PFDN1
NaN	NaN	NaN	NaN	NaN	NaN	NaN	NaN	NaN	NaN	NaN	NaN	NaN	NaN				2	2	2	41.3	41.3	41.3	13.952	0.00039944	0	0	0	0	1	0	0	1	0	2	0	0	0	0	0	0	0	O60927	O60927	Protein phosphatase 1 regulatory subunit 11	PPP1R11
0.96911	0.99489	0.97146	0.88679	0.70054	1.3085	0.58397	1.1648	0.69291	0.84163	0.70758	0.90295	NaN	0.86612				18	18	18	36.1	36.1	36.1	84.958	0	13438000000	7449600000	5988300000	6	9	10	10	8	9	7	3	4	4	6	6	5	4	O60934	O60934	Nibrin	NBN
1.1619	0.96462	1.228	1.0368	1.0504	1.7147	0.78538	1.0862	0.80028	0.8899	1.0989	0.79418	0.9238	0.86838				7	7	7	56.2	56.2	56.2	22.629	0	21379000000	11308000000	10070000000	4	4	4	5	4	3	4	4	3	4	2	4	2	3	O60936;O60936-3;O60936-1	O60936;O60936-3;O60936-1	Nucleolar protein 3	NOL3
1.0207	0.9555	NaN	NaN	NaN	NaN	0.54445	0.99024	0.75418	1.2281	NaN	0.99371	NaN	1.0976				6	6	6	11.6	11.6	11.6	68.556	0	2127700000	1024500000	1103200000	2	5	2	2	2	2	3	3	3	3	1	2	2	3	O60942;O60942-4;O60942-2;O60942-3	O60942;O60942-4;O60942-2;O60942-3	mRNA-capping enzyme;Polynucleotide 5-triphosphatase;mRNA guanylyltransferase	RNGTT
0.91384	0.90391	0.92605	0.73891	0.65359	1.2616	0.46425	1.0925	0.69893	0.72787	0.89422	0.97663	0.81028	0.84722				15	15	15	23	23	23	82.64	0	21866000000	11667000000	10199000000	7	8	8	9	6	5	5	6	6	6	5	5	4	5	O75027;O75027-2;O75027-3	O75027;O75027-2;O75027-3	ATP-binding cassette sub-family B member 7, mitochondrial	ABCB7
NaN	1.2791	1.6404	1.4285	NaN	1.3781	NaN	NaN	NaN	0.85754	NaN	0.82404	0.69105	0.69241				13	13	12	16.7	16.7	15.6	120.88	0	2667400000	1299200000	1368200000	3	2	3	4	2	4	4	3	3	1	2	2	1	2	O75044;P0DMP2;P0DJJ0	O75044	SLIT-ROBO Rho GTPase-activating protein 2	SRGAP2
NaN	NaN	NaN	NaN	0.89272	NaN	NaN	NaN	NaN	NaN	NaN	NaN	NaN	NaN				3	3	3	4.2	4.2	4.2	99.995	0	1288800000	645640000	643180000	1	1	0	2	3	1	1	1	1	1	1	1	1	1	O75061;O75061-4;O75061-2;O75061-3	O75061;O75061-4;O75061-2;O75061-3	Putative tyrosine-protein phosphatase auxilin	DNAJC6
NaN	NaN	NaN	NaN	NaN	NaN	NaN	NaN	NaN	NaN	0.71402	0.86854	0.74878	NaN				3	3	3	14.4	14.4	14.4	46.432	0	892950000	483250000	409700000	0	0	0	1	0	0	0	1	1	1	3	2	2	1	O75063	O75063	Glycosaminoglycan xylosylkinase	FAM20B
0.95311	0.91546	0.98532	1.0155	0.74639	1.4563	0.65194	1.0393	0.75022	0.83682	0.82627	0.85688	0.88094	0.79747				25	25	25	55.8	55.8	55.8	66.193	0	427640000000	222220000000	205420000000	22	22	21	22	23	22	20	18	17	16	17	17	18	16	O75083;O75083-3	O75083;O75083-3	WD repeat-containing protein 1	WDR1
0.98249	0.88838	0.87088	0.82413	0.67662	1.2441	0.53339	0.95498	0.77195	0.81874	0.79824	0.81536	0.71415	0.76289				50	50	44	41.8	41.8	37	160.9	0	115100000000	63631000000	51472000000	33	35	36	34	34	36	36	30	30	27	29	26	22	23	O75116	O75116	Rho-associated protein kinase 2	ROCK2
0.96487	0.92344	1.041	0.90109	0.7531	1.3383	0.63555	0.89517	0.58903	0.78216	0.69141	0.71136	0.75426	0.64282				26	26	1	24.4	24.4	1.3	141.13	0	54504000000	29183000000	25321000000	6	7	8	9	7	12	7	13	9	8	9	10	5	9	O75122;O75122-2	O75122	CLIP-associating protein 2	CLASP2
NaN	NaN	NaN	NaN	NaN	NaN	NaN	NaN	NaN	NaN	NaN	NaN	NaN	NaN				26	1	1	20.8	1.1	1.1	165.92	0.0039363	185990000	151180000	34809000	5	6	7	8	7	12	6	12	8	7	8	9	4	8	O75122-3	O75122-3	CLIP-associating protein 2	CLASP2
0.81502	NaN	0.96962	NaN	NaN	NaN	NaN	NaN	NaN	NaN	NaN	NaN	NaN	NaN				9	9	9	14.7	14.7	14.7	78.855	0	1252400000	556500000	695860000	3	3	4	2	1	2	2	2	3	3	2	2	1	2	O75127	O75127	Pentatricopeptide repeat-containing protein 1, mitochondrial	PTCD1
NaN	0.60934	1.2553	NaN	0.96795	NaN	0.87282	1.1809	NaN	1.1704	NaN	1.2979	NaN	NaN				10	10	3	10.6	10.6	2.6	135.62	0	2907300000	1402400000	1504800000	1	2	3	4	3	2	3	3	2	3	2	3	2	3	O75128;O75128-3;O75128-7;O75128-2;O75128-5;O75128-4	O75128;O75128-3;O75128-7;O75128-2	Protein cordon-bleu	COBL
1.0449	0.88014	0.86828	0.83122	0.65101	1.1804	0.54317	1.0203	0.67273	0.77238	0.76062	0.66582	0.6532	0.70168				18	18	17	35	35	33.3	60.13	0	234480000000	130490000000	104000000000	15	15	14	13	13	16	14	12	12	13	11	11	11	12	O75131;Q8IYJ1;Q96A23;Q9HCH3;Q9HCH3-2;Q96FN4-2;O95741;Q96A23-2;O95741-2	O75131	Copine-3	CPNE3
NaN	1.0555	NaN	1.0146	NaN	NaN	NaN	NaN	0.87154	NaN	NaN	NaN	NaN	0.68138				14	14	13	16.9	16.9	16	119.39	0	2861900000	1386700000	1475200000	4	4	3	6	3	3	2	3	5	1	3	3	2	3	O75146;O75146-2	O75146;O75146-2	Huntingtin-interacting protein 1-related protein	HIP1R
0.96242	0.89549	0.99547	0.97574	0.67687	1.1615	0.55296	0.93793	0.65099	0.76213	0.68846	0.82887	0.6383	0.65742				32	32	28	33.8	33.8	30.7	113.65	0	26578000000	14075000000	12503000000	15	15	14	11	16	10	15	12	16	13	12	14	8	12	O75150;O75150-4;O75150-3	O75150;O75150-4;O75150-3	E3 ubiquitin-protein ligase BRE1B	RNF40
1.0319	1.0791	0.93463	0.87429	0.97726	1.2576	0.57602	1.16	0.6978	0.85821	0.88836	0.80696	0.85717	0.79325				26	26	26	41.5	41.5	41.5	89.13	0	39870000000	19472000000	20398000000	15	14	15	13	11	9	13	13	14	14	18	16	14	13	O75152	O75152	Zinc finger CCCH domain-containing protein 11A	ZC3H11A
1.0989	1.0347	1.0433	0.96098	0.73894	1.399	0.62628	1.0841	0.77368	0.8555	0.79599	0.78928	0.76906	0.73236				34	34	34	34.5	34.5	34.5	146.67	0	69533000000	36748000000	32785000000	18	19	21	20	17	22	21	23	21	18	19	22	18	18	O75153;Q9Y5I4;Q9Y5I4-2	O75153	Clustered mitochondria protein homolog	CLUH
0.92004	0.95792	0.97391	1.0056	0.74353	1.3338	0.67312	1.1786	0.73961	0.83805	0.94048	0.90481	0.78789	0.72244				35	35	35	20.2	20.2	20.2	254.41	0	25328000000	13629000000	11699000000	14	15	13	15	16	10	16	15	10	18	15	13	13	16	O75165	O75165	DnaJ homolog subfamily C member 13	DNAJC13
0.66411	0.86402	0.96162	0.91818	0.65789	1.3618	0.53066	0.97466	NaN	0.84197	0.94142	NaN	NaN	NaN				7	7	7	12.1	12.1	12.1	81.871	0	9271300000	5812600000	3458700000	4	3	5	6	6	5	5	3	3	3	4	2	3	3	O75175;O75175-2;O75175-3	O75175;O75175-2;O75175-3	CCR4-NOT transcription complex subunit 3	CNOT3
1.027	1.0299	0.97303	1.0328	0.76903	1.331	0.76965	0.94632	0.81044	0.87009	0.82616	0.88765	0.84846	0.7789				30	30	18	15.9	15.9	10.2	274.25	0	137160000000	70089000000	67068000000	12	17	17	13	12	13	15	11	10	13	9	10	9	10	O75179;O75179-7;O75179-2;O75179-6;O75179-4;O75179-3;O75179-5	O75179;O75179-7;O75179-2;O75179-6;O75179-4;O75179-3	Ankyrin repeat domain-containing protein 17	ANKRD17
NaN	NaN	NaN	NaN	NaN	1.3982	0.46181	NaN	NaN	NaN	NaN	NaN	NaN	NaN				4	4	4	5	5	5	133.06	0	931840000	455460000	476380000	1	1	1	0	1	3	3	0	0	1	0	1	1	1	O75182;O75182-2;O75182-3	O75182;O75182-2;O75182-3	Paired amphipathic helix protein Sin3b	SIN3B
NaN	NaN	NaN	1.0779	1.1054	NaN	1.0935	1.0262	1.2372	1.0469	NaN	NaN	NaN	1.0497				4	4	3	12.9	12.9	8.9	36.087	0	3471100000	1952200000	1518900000	1	2	2	2	2	2	2	2	3	2	2	2	3	2	O75190;O75190-3;O75190-2;O75190-4	O75190;O75190-3;O75190-2	DnaJ homolog subfamily B member 6	DNAJB6
NaN	NaN	NaN	NaN	NaN	NaN	NaN	NaN	NaN	NaN	NaN	NaN	NaN	NaN				2	2	2	6.2	6.2	6.2	58.382	0.0087304	79831000	29405000	50426000	0	0	0	0	0	0	0	1	0	1	1	0	0	1	O75191;O75191-2	O75191;O75191-2	Xylulose kinase	XYLB
NaN	NaN	NaN	NaN	NaN	NaN	NaN	NaN	NaN	NaN	NaN	NaN	NaN	NaN				1	1	1	7.6	7.6	7.6	25.841	0.00020408	217150000	143420000	73735000	0	0	0	0	0	0	0	1	1	1	1	1	0	1	O75204	O75204	Transmembrane protein 127	TMEM127
0.99587	0.77528	1.0197	0.91311	0.55107	0.93617	0.33752	0.89095	0.66616	0.89939	0.79496	1.0021	0.64895	0.7579				7	7	7	33.6	33.6	33.6	35.509	0	21692000000	12412000000	9280200000	3	5	4	4	3	3	7	5	3	3	5	3	2	3	O75208;O75208-2	O75208	Ubiquinone biosynthesis protein COQ9, mitochondrial	COQ9
0.98343	0.91696	0.86619	0.93041	0.66632	1.2813	0.52795	1.004	0.72612	0.82905	0.81191	0.8112	0.77846	0.77946				8	8	8	41.5	41.5	41.5	21.007	0	71450000000	38929000000	32521000000	5	7	6	7	6	6	5	6	6	6	7	6	5	6	O75223;O75223-3;O75223-2;O75223-4	O75223;O75223-3	Gamma-glutamylcyclotransferase	GGCT
1.1501	1.0809	1.1259	0.97803	0.78113	NaN	0.65573	1.0231	0.53363	0.76383	0.80313	0.75619	0.85221	0.89422				4	4	4	18.3	18.3	18.3	23.563	0	10757000000	5700400000	5056400000	1	1	1	1	1	1	1	1	1	2	1	2	2	2	O75251;O75251-2	O75251;O75251-2	NADH dehydrogenase [ubiquinone] iron-sulfur protein 7, mitochondrial	NDUFS7
1.0159	0.79449	0.71817	0.76118	0.50489	0.93022	0.58502	0.9324	0.80565	0.88566	1.0872	0.90932	0.92045	0.95217				14	14	14	41.3	41.3	41.3	52.545	0	67293000000	38140000000	29153000000	9	9	8	10	9	8	11	9	9	11	10	11	10	12	O75306;O75306-2	O75306;O75306-2	NADH dehydrogenase [ubiquinone] iron-sulfur protein 2, mitochondrial	NDUFS2
0.99964	1.072	1.0621	1.0787	0.75353	1.3936	0.68963	0.92747	0.72159	0.81531	0.84029	0.84828	0.75636	0.80945				13	13	13	41	41	41	50.925	0	11191000000	6289800000	4901000000	7	7	7	8	7	5	5	6	6	4	3	5	5	7	O75312	O75312	Zinc finger protein ZPR1	ZNF259
0.84593	0.77966	0.74388	0.97431	0.69562	0.93494	0.45617	1.097	0.62594	0.81292	0.76277	0.74045	0.69173	0.68663				7	6	6	28	25.5	25.5	33.742	0	23822000000	14063000000	9758500000	3	3	3	3	3	3	3	6	3	3	3	4	3	3	O75323;O75323-2	O75323;O75323-2	Protein NipSnap homolog 2	GBAS
1.0697	0.9473	0.76829	0.5998	0.39188	0.76434	0.22084	0.59192	NaN	NaN	0.39537	NaN	0.45453	0.24113				17	17	16	24.9	24.9	23.9	84.099	0	5482200000	2970000000	2512200000	7	10	9	9	8	5	8	4	1	2	4	1	4	4	O75330;O75330-4;O75330-2;O75330-3	O75330;O75330-4;O75330-2;O75330-3	Hyaluronan mediated motility receptor	HMMR
1.006	0.94158	0.96652	0.939	0.76162	1.3376	0.58732	1.0106	0.66262	0.77819	0.81214	0.82061	0.71449	0.74125				9	9	1	35.1	35.1	4.7	21.868	0	569650000000	306300000000	263350000000	8	9	8	9	8	8	8	7	7	8	8	8	8	8	O75340	O75340	Programmed cell death protein 6	PDCD6
1.0392	0.97384	0.98622	0.94015	0.75415	1.4196	0.54381	1.0447	0.73376	0.75311	0.77613	0.75152	0.7403	0.7221				12	12	12	61.1	61.1	61.1	12.855	0	370930000000	200060000000	170870000000	11	11	11	11	11	10	11	8	9	9	10	10	9	9	O75347;O75347-2	O75347;O75347-2	Tubulin-specific chaperone A	TBCA
0.97187	1.1547	NaN	1.0633	0.62327	1.5165	NaN	0.73879	0.64913	NaN	NaN	NaN	NaN	NaN				4	4	4	44.1	44.1	44.1	13.757	0	11721000000	8335200000	3386100000	2	3	3	3	4	2	3	2	3	3	1	2	2	2	O75348;O95670;O95670-2	O75348	V-type proton ATPase subunit G 1	ATP6V1G1
1.2116	0.66672	0.77709	1.1556	0.76842	NaN	0.68518	0.64352	0.70864	0.76037	0.71599	1.0462	0.71719	0.76943				9	7	7	25.7	21.2	21.2	49.301	0	10249000000	5749400000	4499100000	5	4	4	5	5	5	6	4	5	5	4	4	4	5	O75351	O75351	Vacuolar protein sorting-associated protein 4B	VPS4B
NaN	NaN	NaN	NaN	NaN	NaN	NaN	NaN	NaN	NaN	NaN	NaN	NaN	NaN				3	3	3	8.1	8.1	8.1	26.638	0	199650000	199650000	0	1	0	0	0	0	1	0	2	2	1	2	2	1	2	O75352;O75352-2	O75352;O75352-2	Mannose-P-dolichol utilization defect 1 protein	MPDU1
NaN	NaN	NaN	NaN	NaN	NaN	NaN	NaN	NaN	NaN	NaN	NaN	NaN	NaN				2	2	2	2.6	2.6	2.6	115.27	0.00059218	272490000	235870000	36625000	0	0	0	0	0	0	0	1	1	1	0	0	0	0	O75362	O75362	Zinc finger protein 217	ZNF217
0.97577	0.86644	0.82698	0.82593	0.63046	1.1609	0.51429	0.98576	0.63593	0.85725	0.82455	0.82322	0.81023	0.76021				19	19	19	52.2	52.2	52.2	39.617	0	674840000000	412270000000	262570000000	17	17	17	17	17	17	17	15	16	16	16	17	16	14	O75367;O75367-3;O75367-2;Q9P0M6	O75367;O75367-3;O75367-2	Core histone macro-H2A.1	H2AFY
1.007	1.1037	1.0854	1.1602	0.80984	1.4422	0.78174	1.1577	0.77946	0.95051	0.93589	1.0082	0.84633	0.82493				7	7	7	78.1	78.1	78.1	12.774	0	17157000000	8823900000	8333200000	4	5	3	3	4	4	5	3	2	3	2	3	3	3	O75368	O75368	SH3 domain-binding glutamic acid-rich-like protein	SH3BGRL
1.0091	0.91933	0.94691	0.95778	0.75316	1.3302	0.60608	1.0138	0.73229	0.83398	0.81205	0.84999	0.79347	0.7535				161	150	147	72.1	69.8	68.1	281.63	0	3553700000000	1897100000000	1656600000000	136	136	136	134	136	137	136	129	124	121	119	124	127	124	O75369-8;O75369;O75369-2;O75369-9;O75369-6;O75369-3;O75369-7;O75369-5;O75369-4	O75369-8;O75369;O75369-2;O75369-9;O75369-6;O75369-3;O75369-7;O75369-5;O75369-4	Filamin-B	FLNB
NaN	0.79749	0.87915	NaN	NaN	NaN	NaN	NaN	NaN	NaN	NaN	NaN	NaN	NaN				18	18	17	12.8	12.8	12.1	270.21	0	2448800000	1236200000	1212600000	3	7	4	3	3	2	4	2	2	3	2	3	1	3	O75376;O75376-2	O75376;O75376-2	Nuclear receptor corepressor 1	NCOR1
0.96359	0.98177	0.922	0.77098	0.7499	1.135	0.817	1.0634	0.6638	0.91633	0.84961	0.83843	1.0399	0.82248				5	5	5	54	54	54	13.711	0	33316000000	16895000000	16421000000	3	3	4	4	3	3	4	5	5	5	3	4	5	4	O75380	O75380	NADH dehydrogenase [ubiquinone] iron-sulfur protein 6, mitochondrial	NDUFS6
0.961	0.88539	0.82049	0.74933	0.61476	0.78742	0.42256	1.0761	0.63424	0.98656	1.0187	0.93539	0.82584	0.70943				6	6	6	21.8	21.8	21.8	41.236	0	8661100000	5030000000	3631000000	3	4	4	3	4	3	4	2	3	3	3	3	3	3	O75381;O75381-2	O75381;O75381-2	Peroxisomal membrane protein PEX14	PEX14
NaN	NaN	NaN	NaN	NaN	NaN	NaN	NaN	NaN	NaN	NaN	NaN	NaN	NaN				5	5	5	9.8	9.8	9.8	80.829	0	5747200000	3155400000	2591800000	0	2	0	2	1	0	0	1	1	2	2	2	2	2	O75382;O75382-4;O75382-3;O75382-2	O75382;O75382-4;O75382-3;O75382-2	Tripartite motif-containing protein 3	TRIM3
1.0215	0.85752	0.8609	0.84967	0.62997	1.0759	0.47332	1.0077	0.65239	0.7965	0.75372	0.74178	0.68357	0.65725				19	19	19	32.2	32.2	32.2	51.712	0	720140000000	399390000000	320750000000	16	17	15	17	15	15	16	16	16	14	16	15	15	15	O75390	O75390	Citrate synthase, mitochondrial	CS
0.85956	0.74034	0.93127	0.90215	0.75769	1.1315	0.42949	1.0219	NaN	0.73311	0.7648	NaN	0.74709	0.49206				6	6	6	35.7	35.7	35.7	26.034	0	17769000000	10940000000	6828400000	5	3	4	3	3	5	4	4	4	3	4	3	4	4	O75391	O75391	Sperm-associated antigen 7	SPAG7
NaN	NaN	NaN	NaN	NaN	NaN	NaN	NaN	NaN	0.73288	NaN	0.6949	0.6863	0.64324				2	2	2	38.5	38.5	38.5	7.6191	0	10522000000	5825800000	4696500000	1	2	2	2	1	1	1	1	2	2	1	2	2	1	O75394	O75394	39S ribosomal protein L33, mitochondrial	MRPL33
1.0084	0.89849	1.0933	0.77143	0.76553	1.4211	0.60016	1.0106	0.66017	0.93262	0.92935	0.86725	0.73451	0.87706				11	11	11	51.2	51.2	51.2	24.593	0	566950000000	297510000000	269440000000	10	10	11	10	11	11	10	10	10	10	10	10	11	10	O75396	O75396	Vesicle-trafficking protein SEC22b	SEC22B
0.98717	0.88785	0.89763	0.88346	0.64685	1.2521	0.54336	0.96097	0.7112	0.84605	0.80209	0.83101	0.71283	0.67208				18	18	16	21.7	21.7	19.7	108.8	0	49070000000	26148000000	22922000000	10	9	10	12	8	9	6	11	10	12	11	11	10	12	O75400;O75400-2;O75400-3	O75400;O75400-2;O75400-3	Pre-mRNA-processing factor 40 homolog A	PRPF40A
1.1338	0.79473	0.85615	1.1602	NaN	1.2101	0.65918	1.1895	NaN	NaN	0.8985	0.77987	0.73108	NaN				6	6	6	12.2	12.2	12.2	65.568	0	3461300000	1806100000	1655100000	2	3	3	2	1	2	3	3	1	1	2	3	2	1	O75419;O75419-2;O75419-3	O75419;O75419-2;O75419-3	Cell division control protein 45 homolog	CDC45
0.72312	0.96226	0.99812	0.90223	0.73264	1.532	0.77226	1.297	0.73021	0.79123	0.89954	0.95843	0.88426	0.86105				7	7	7	29.3	29.3	29.3	29.763	0	13612000000	7726100000	5885700000	3	3	4	4	4	4	5	3	4	3	3	2	2	3	O75431;O75431-2	O75431;O75431-2	Metaxin-2	MTX2
0.98331	0.93513	0.91777	1.0437	0.68468	1.2872	0.60711	0.98587	0.70902	0.81417	0.86038	0.86627	0.74418	0.6883				15	15	14	53.8	53.8	51.7	38.169	0	153100000000	84036000000	69063000000	9	9	10	10	8	9	7	12	11	11	11	12	10	9	O75436;O75436-2	O75436;O75436-2	Vacuolar protein sorting-associated protein 26A	VPS26A
0.96334	0.70312	0.76328	0.77052	0.60051	1.0699	0.46184	0.96764	0.67696	NaN	0.90277	NaN	0.67957	NaN				2	2	2	20.7	20.7	20.7	6.9611	0	12855000000	7363700000	5491700000	1	1	1	1	1	1	1	1	1	1	1	2	1	1	O75438;O75438-2	O75438;O75438-2	NADH dehydrogenase [ubiquinone] 1 beta subcomplex subunit 1	NDUFB1
0.9532	0.91585	0.87256	0.89525	0.61308	1.1415	0.7049	0.98781	0.6218	0.77269	0.72493	0.83148	0.79773	0.67834				19	18	18	44.8	43.4	43.4	54.366	0	99722000000	53033000000	46689000000	18	17	15	17	16	14	16	14	11	10	8	9	10	11	O75439	O75439	Mitochondrial-processing peptidase subunit beta	PMPCB
NaN	NaN	NaN	NaN	NaN	NaN	0.43853	NaN	NaN	NaN	NaN	1.0528	NaN	0.78245				3	3	3	14.5	14.5	14.5	23.306	0	1072100000	608560000	463590000	1	1	1	0	1	0	2	1	1	2	1	3	2	2	O75446	O75446	Histone deacetylase complex subunit SAP30	SAP30
1.007	0.85299	0.91471	0.8623	0.68623	1.23	0.56293	1.0522	0.6798	0.85529	0.8615	0.85608	0.84126	0.79319				17	17	16	29.8	29.8	29.8	60.103	0	121570000000	62592000000	58982000000	14	14	13	13	13	14	14	9	10	10	8	10	10	9	O75475;O75475-2;O75475-3	O75475;O75475-2;O75475-3	PC4 and SFRS1-interacting protein	PSIP1
0.88128	0.92085	0.8893	0.75382	0.70253	1.3891	0.53704	0.99071	0.58189	0.81099	0.91595	0.75508	0.76912	0.74376				11	8	8	35.5	30.1	30.1	38.925	0	11387000000	6221100000	5165600000	7	6	7	8	6	7	6	6	5	4	3	6	4	5	O75477;O94905-2;O94905-3	O75477	Erlin-1	ERLIN1
0.96975	0.84219	0.94364	0.95181	0.56664	1.0504	0.56837	1.0672	0.71537	0.8095	0.8111	0.99008	0.85248	0.69601				9	9	9	39.8	39.8	39.8	30.241	0	45884000000	25151000000	20733000000	5	4	3	3	4	3	4	7	5	8	6	8	8	8	O75489;O75489-2	O75489	NADH dehydrogenase [ubiquinone] iron-sulfur protein 3, mitochondrial	NDUFS3
0.8232	0.97611	0.86641	0.92252	0.61261	1.3302	0.80652	0.89013	0.95778	1.2298	0.8064	1.0676	0.96028	0.84635				7	7	7	22.9	22.9	22.9	31.3	0	85558000000	44760000000	40799000000	7	7	6	6	7	7	6	4	4	4	5	5	4	5	O75494;O75494-3;O75494-4;O75494-5;O75494-6;O75494-2;Q8WXF0	O75494;O75494-3;O75494-4;O75494-5;O75494-6;O75494-2	Serine/arginine-rich splicing factor 10	SRSF10
0.89363	0.67647	NaN	NaN	NaN	NaN	NaN	NaN	NaN	NaN	NaN	NaN	NaN	NaN				5	5	5	18.7	18.7	18.7	23.565	0	5922100000	4701300000	1220900000	4	4	2	2	3	2	2	2	3	1	2	1	1	1	O75496	O75496	Geminin	GMNN
0.90077	0.79141	0.87431	1.0178	0.61615	1.3341	0.56296	0.91416	0.64306	0.70835	0.48862	0.60729	0.59497	NaN				2	2	2	39.5	39.5	39.5	8.5435	0	15214000000	8366900000	6847000000	2	2	2	2	2	1	2	2	2	2	2	2	2	1	O75506	O75506	Heat shock factor-binding protein 1	HSBP1
0.9658	0.90327	0.91342	0.9008	0.6688	1.179	0.61693	0.99576	0.70365	1.0221	1.0097	0.96198	0.89445	0.78759				17	17	17	52.8	52.8	52.8	43.585	0	188270000000	103770000000	84509000000	13	16	16	15	14	16	14	14	14	14	16	15	15	16	O75521;O75521-2	O75521;O75521-2	Enoyl-CoA delta isomerase 2, mitochondrial	ECI2
NaN	NaN	NaN	NaN	NaN	NaN	NaN	NaN	NaN	NaN	NaN	NaN	NaN	NaN				1	1	1	2	2	2	66.155	0.0097791	0	0	0	0	0	0	0	0	0	0	1	0	0	0	0	0	0	O75529;O75529-2	O75529;O75529-2	TAF5-like RNA polymerase II p300/CBP-associated factor-associated factor 65 kDa subunit 5L	TAF5L
0.94136	0.9886	1.3316	0.76736	0.67299	1.3793	0.81115	0.97361	0.73854	0.77956	0.88108	0.78612	0.78596	0.63592				13	13	13	32.4	32.4	32.4	50.197	0	12201000000	6841700000	5359200000	5	6	6	7	7	4	6	7	7	5	8	5	4	7	O75530;O75530-2;O75530-3	O75530;O75530-2;O75530-3	Polycomb protein EED	EED
0.97949	0.83896	0.96518	0.59115	0.6604	1.236	0.80274	0.98037	0.62616	0.81534	0.89555	0.88521	0.7496	0.74259				10	10	10	70.8	70.8	70.8	10.058	0	186110000000	98886000000	87226000000	9	9	8	9	9	9	9	7	7	7	7	7	7	7	O75531	O75531	Barrier-to-autointegration factor;Barrier-to-autointegration factor, N-terminally processed	BANF1
1.0267	1.0428	1.1203	0.94055	0.78791	1.4506	0.76896	1.0132	0.77989	0.89173	0.8867	1.0433	0.86561	0.817				58	58	58	53	53	53	145.83	0	420710000000	205630000000	215080000000	39	43	46	43	46	42	36	35	36	37	38	37	37	35	O75533;O75533-2	O75533	Splicing factor 3B subunit 1	SF3B1
0.99268	0.94376	0.91681	0.89351	0.68318	1.2812	0.56212	1.0016	0.7328	0.81277	0.83374	0.85554	0.78013	0.73385				42	42	42	54.9	54.9	54.9	88.884	0	421160000000	229270000000	191890000000	32	32	33	37	33	32	32	31	28	30	28	31	31	29	O75534;O75534-4;O75534-2;O75534-3	O75534;O75534-4;O75534-2;O75534-3	Cold shock domain-containing protein E1	CSDE1
NaN	NaN	NaN	NaN	NaN	NaN	NaN	NaN	NaN	NaN	NaN	NaN	NaN	NaN				2	2	2	7.4	7.4	7.4	42.506	0	1137500000	786520000	350990000	0	1	0	0	0	0	0	2	2	2	0	2	1	1	O75554;O75554-2	O75554;O75554-2	WW domain-binding protein 4	WBP4
1.0296	0.98552	NaN	NaN	NaN	1.4334	NaN	NaN	NaN	NaN	NaN	NaN	NaN	NaN				5	5	5	23.6	23.6	23.6	34.404	0	2477000000	1258700000	1218300000	4	3	1	2	2	4	4	1	1	1	2	1	1	1	O75569;O75569-3;O75569-2	O75569;O75569-3;O75569-2	Interferon-inducible double stranded RNA-dependent protein kinase activator A	PRKRA
NaN	NaN	NaN	NaN	NaN	NaN	NaN	NaN	NaN	NaN	NaN	NaN	NaN	NaN				3	3	3	2.2	2.2	2.2	180.43	0.0062615	12164000000	8364600000	3799600000	1	1	1	1	1	1	1	0	1	1	1	1	1	1	O75581	O75581	Low-density lipoprotein receptor-related protein 6	LRP6
NaN	NaN	NaN	NaN	NaN	NaN	NaN	NaN	NaN	NaN	NaN	NaN	NaN	NaN				2	2	2	12.6	12.6	12.6	28.424	0.0013441	43374000	0	43374000	0	0	0	0	0	0	0	0	0	1	0	1	0	0	O75586;O75586-3;O75586-2	O75586;O75586-3;O75586-2	Mediator of RNA polymerase II transcription subunit 6	MED6
1.0843	NaN	NaN	NaN	NaN	NaN	NaN	NaN	NaN	NaN	NaN	NaN	1.1139	NaN				10	10	10	3	3	3	510.08	0	853190000	411110000	442090000	3	1	1	3	2	2	3	1	2	1	1	1	2	0	O75592;O75592-2	O75592;O75592-2	Probable E3 ubiquitin-protein ligase MYCBP2	MYCBP2
NaN	NaN	NaN	0.84715	0.80038	NaN	NaN	NaN	NaN	1.0715	1.1992	0.85313	1.579	1.8821				4	4	4	15.5	15.5	15.5	45.285	0	6847500000	3639300000	3208300000	2	2	1	2	3	2	2	3	1	3	3	3	2	1	O75600;O75600-2	O75600;O75600-2	2-amino-3-ketobutyrate coenzyme A ligase, mitochondrial	GCAT
1.0132	1.1064	1.2393	0.9591	0.69847	1.5173	0.57325	1.013	1.1227	1.6732	1.2566	1.1372	0.93692	1.2948				4	4	4	30.9	30.9	30.9	19.343	0	13377000000	6953400000	6423200000	3	3	2	2	1	4	1	2	3	3	3	2	3	3	O75607	O75607	Nucleoplasmin-3	NPM3
0.98983	0.99402	1.0336	1.0054	0.76491	1.4157	0.57267	0.97209	0.63805	0.87381	0.80928	0.98467	0.72832	0.77956				4	4	4	21.7	21.7	21.7	24.669	0	76670000000	38023000000	38647000000	4	4	4	4	4	4	4	4	4	4	4	4	4	4	O75608;O75608-2	O75608;O75608-2	Acyl-protein thioesterase 1	LYPLA1
0.95009	0.86112	0.71404	0.8368	0.66348	1.2073	0.49398	0.85396	0.55576	0.69126	0.68497	0.68741	0.74589	0.6441				12	12	12	38.7	38.7	38.7	48.349	0	35319000000	20298000000	15021000000	6	7	3	6	8	8	6	8	7	8	7	9	7	7	O75616;O75616-2	O75616;O75616-2	GTPase Era, mitochondrial	ERAL1
1.2041	0.77675	0.5806	0.7078	0.55573	0.97364	NaN	1.0021	0.5269	0.66362	0.59377	0.81648	0.69908	0.68475				1	1	1	5.5	5.5	5.5	24.074	0	9595400000	5647700000	3947600000	1	1	1	1	1	1	1	1	1	1	1	1	1	1	O75629	O75629	Protein CREG1	CREG1
0.97182	0.99615	0.96822	0.84946	0.77574	0.95004	0.61267	0.99771	0.85546	NaN	NaN	NaN	NaN	0.868				5	5	5	51.1	51.1	51.1	18.236	0	25500000000	14131000000	11369000000	2	2	1	3	3	2	3	2	2	3	2	2	1	4	O75638-2;O75638	O75638-2;O75638	Cancer/testis antigen 2	CTAG2
0.98126	0.9481	0.9599	0.91317	0.71572	1.3221	0.63491	0.99728	0.71488	0.85784	0.81054	0.8718	0.77922	0.75489				88	88	87	42.1	42.1	41.8	244.5	0	677040000000	359050000000	317990000000	68	67	61	67	62	61	63	63	64	63	59	64	62	63	O75643;O75643-2	O75643	U5 small nuclear ribonucleoprotein 200 kDa helicase	SNRNP200
0.99646	NaN	0.91401	NaN	NaN	NaN	NaN	NaN	0.58268	NaN	NaN	0.72456	0.60892	0.64241				6	6	3	19.5	19.5	8.8	47.744	0	6310600000	3568300000	2742300000	3	2	2	1	3	3	0	1	3	3	2	2	4	2	O75648;O75648-2;O75648-5	O75648;O75648-2	Mitochondrial tRNA-specific 2-thiouridylase 1	TRMU
1.016	0.87533	0.86406	0.90979	0.78924	1.1743	0.5331	1.0508	0.66072	0.82178	0.7781	0.67596	0.721	0.74184				11	11	11	43	43	43	31.444	0	111930000000	56710000000	55216000000	8	8	8	9	9	8	7	5	6	7	6	6	5	5	O75663;O75663-2	O75663;O75663-2	TIP41-like protein	TIPRL
0.9799	0.99562	0.97305	0.97811	0.84457	1.1096	0.47933	1.3513	NaN	NaN	NaN	NaN	NaN	NaN				5	5	5	14.7	14.7	14.7	52.988	0	2299300000	1267800000	1031500000	3	3	3	3	4	3	2	2	1	0	1	2	0	1	O75674;O75674-2;O75674-3	O75674;O75674-2;O75674-3	TOM1-like protein 1	TOM1L1
0.97189	NaN	NaN	NaN	NaN	NaN	NaN	NaN	NaN	NaN	NaN	NaN	NaN	NaN				5	5	5	11.4	11.4	11.4	41.45	0.00078339	966560000	569850000	396710000	2	1	3	2	1	2	1	0	1	0	0	0	0	0	O75683	O75683	Surfeit locus protein 6	SURF6
NaN	1.1448	NaN	0.98943	0.88185	1.7	NaN	NaN	NaN	NaN	0.61243	NaN	NaN	NaN				8	6	6	20.3	17.3	17.3	52.642	0	1979800000	967020000	1012800000	3	4	4	4	4	3	4	5	4	4	3	3	3	4	O75688;O75688-4;O75688-2;O75688-5;O75688-3	O75688;O75688-4;O75688-2;O75688-5	Protein phosphatase 1B	PPM1B
0.96692	0.84587	0.89143	0.79497	0.66985	1.242	0.50783	1.0178	0.65778	0.77275	0.81355	0.73391	0.71524	0.8857				31	31	31	13.8	13.8	13.8	318.38	0	21102000000	11389000000	9712200000	14	15	19	14	15	14	16	14	11	12	11	10	12	13	O75691	O75691	Small subunit processome component 20 homolog	UTP20
0.9934	0.9419	0.93722	0.90782	0.69831	1.3385	0.69908	1.0417	0.74837	0.88536	0.88192	0.87566	0.7767	0.75435				46	46	46	36.4	36.4	36.4	155.2	0	359090000000	192160000000	166920000000	36	39	36	37	41	40	36	33	30	38	34	32	32	35	O75694;O75694-2	O75694;O75694-2	Nuclear pore complex protein Nup155	NUP155
1.148	1.0623	0.98642	0.80794	0.7411	1.28	0.57659	1.065	0.76837	0.86443	1.0221	0.83703	0.85638	0.76793				6	6	6	16.6	16.6	16.6	39.641	0	5889800000	3067700000	2822000000	3	3	4	4	3	3	3	4	2	2	3	2	2	3	O75695	O75695	Protein XRP2	RP2
0.96438	1.0462	1.0987	1.0846	0.83785	1.469	0.63866	1.0373	0.68068	0.82154	0.83174	0.96572	0.7231	0.83209				21	21	21	29.4	29.4	29.4	125.97	0	24367000000	12830000000	11536000000	9	7	7	10	8	8	8	10	7	8	6	9	9	7	O75717;O75717-2	O75717;O75717-2	WD repeat and HMG-box DNA-binding protein 1	WDHD1
0.99668	0.84997	0.96164	0.89632	0.60551	1.2429	0.50768	1.0199	0.59828	0.73002	0.72583	0.79103	0.6453	0.62927				13	13	13	33.7	33.7	33.7	46.561	0	91393000000	51964000000	39429000000	12	11	12	10	12	11	9	7	7	8	7	9	7	7	O75718	O75718	Cartilage-associated protein	CRTAP
1.1166	0.92453	1.0785	0.76467	0.6092	1.4079	0.51747	0.97973	0.51284	0.83635	0.95586	0.7296	0.66516	0.74957				16	10	10	26.4	18.1	18.1	74.761	0	8719700000	4810800000	3908900000	9	12	9	8	9	8	8	10	10	11	10	11	10	11	O75746;O75746-2	O75746;O75746-2	Calcium-binding mitochondrial carrier protein Aralar1	SLC25A12
NaN	NaN	1.1739	NaN	NaN	NaN	NaN	NaN	NaN	NaN	NaN	NaN	NaN	NaN				5	5	5	22	22	22	42.075	0	1342700000	729930000	612780000	2	3	3	1	4	2	3	1	1	1	1	1	1	0	O75781;O75781-2	O75781;O75781-2	Paralemmin-1	PALM
1.1453	1.1644	1.0669	0.86982	0.75428	NaN	0.50057	0.94679	0.5412	0.6813	0.72476	0.68561	0.65654	0.64932				5	5	5	17.1	17.1	17.1	39.008	0	6747000000	3762200000	2984800000	3	2	3	4	2	0	2	3	3	3	3	3	2	3	O75787;O75787-2	O75787;O75787-2	Renin receptor	ATP6AP2
0.81202	0.88134	0.82299	1.0324	0.66792	1.1416	0.49107	1.0769	0.72694	0.79351	0.8643	0.87838	0.8473	0.84265				7	7	7	32.4	32.4	32.4	33.395	0	17591000000	9585000000	8005900000	6	5	6	5	6	4	4	5	4	5	4	5	5	4	O75792	O75792	Ribonuclease H2 subunit A	RNASEH2A
1.0089	0.9711	0.93934	0.89942	0.68085	1.3982	0.53596	0.98566	0.67939	0.76427	0.79789	0.81053	0.74109	0.69792				11	11	11	40.8	40.8	40.8	39.134	0	49057000000	26906000000	22151000000	7	7	7	7	9	7	9	8	8	8	8	7	6	8	O75794	O75794	Cell division cycle protein 123 homolog	CDC123
NaN	NaN	NaN	NaN	NaN	NaN	NaN	NaN	NaN	NaN	NaN	0.67387	NaN	NaN				3	3	3	3.9	3.9	3.9	117.31	0	618950000	388290000	230660000	0	1	0	0	0	0	0	1	0	1	0	1	1	0	O75808;O75808-2	O75808	Calpain-15	SOLH
NaN	NaN	NaN	NaN	NaN	NaN	NaN	NaN	NaN	NaN	NaN	NaN	NaN	1.3152				5	5	5	9.1	9.1	9.1	92.565	0	658140000	344910000	313230000	0	2	0	0	0	0	2	1	2	0	2	2	2	3	O75815;O75815-3;O75815-2	O75815;O75815-3;O75815-2	Breast cancer anti-estrogen resistance protein 3	BCAR3
NaN	NaN	NaN	NaN	NaN	NaN	NaN	NaN	NaN	NaN	NaN	NaN	NaN	NaN				3	3	3	32.1	32.1	32.1	15.651	0	1126400000	604000000	522430000	2	0	2	1	2	1	1	1	1	1	1	1	0	1	O75817	O75817	Ribonuclease P protein subunit p20	POP7
1.0779	0.91398	1.0187	0.99914	0.66067	1.2131	0.64167	0.88593	0.67798	0.92017	0.81439	0.79967	0.62576	0.70643				8	8	8	26.4	26.4	26.4	41.833	0	10104000000	5710800000	4392900000	5	6	5	6	7	6	4	3	3	5	3	4	4	3	O75818;O75818-2	O75818;O75818-2	Ribonuclease P protein subunit p40	RPP40
0.99601	0.9735	0.90705	0.9052	0.72572	1.2687	0.54731	1.015	0.6649	0.76263	0.77836	0.71766	0.7529	0.72846				14	14	14	43.1	43.1	43.1	35.611	0	184920000000	101130000000	83785000000	12	12	11	10	10	11	10	11	9	9	10	9	9	9	O75821	O75821	Eukaryotic translation initiation factor 3 subunit G	EIF3G
1.0399	0.90477	0.88663	0.94315	0.81747	1.3484	0.68251	1.0171	0.74144	0.85628	0.87744	0.92802	0.84575	0.8389				16	16	16	71.3	71.3	71.3	29.062	0	269550000000	138940000000	130600000000	13	13	14	14	13	13	15	12	12	14	14	13	13	14	O75822;O75822-2;O75822-3	O75822;O75822-2;O75822-3	Eukaryotic translation initiation factor 3 subunit J	EIF3J
0.91271	0.95895	1.0282	0.87652	0.73542	1.3777	0.58381	0.9352	0.73877	0.79709	0.83772	0.89884	0.75491	0.76519				11	9	9	49.1	38.6	38.6	30.85	0	36337000000	19664000000	16673000000	7	4	5	6	8	6	4	8	8	6	7	6	7	6	O75828	O75828	Carbonyl reductase [NADPH] 3	CBR3
1.0048	0.91731	0.86769	0.9057	0.66079	1.2433	0.67619	1.0142	0.81759	0.91702	0.81846	0.8795	0.86525	0.82396				10	10	10	62.8	62.8	62.8	24.428	0	105650000000	55758000000	49893000000	8	8	8	8	8	7	7	4	6	6	6	7	7	8	O75832;O75832-2	O75832;O75832-2	26S proteasome non-ATPase regulatory subunit 10	PSMD10
1.0045	0.89354	0.93713	0.68176	0.61463	1.2546	0.5383	0.93967	0.66563	0.81786	0.825	0.73198	0.82719	0.66853				10	10	10	23.4	23.4	23.4	54.812	0	71536000000	40323000000	31213000000	10	10	10	9	10	10	10	7	6	6	7	7	6	4	O75844	O75844	CAAX prenyl protease 1 homolog	ZMPSTE24
1.005	1.0312	1.0683	0.99535	0.7726	1.4346	0.61041	0.99859	0.68462	0.89421	0.78597	0.78936	0.75163	0.69242				24	24	23	59.7	59.7	57.5	46.659	0	421600000000	223410000000	198190000000	19	18	20	19	18	20	18	16	17	17	15	16	16	15	O75874	O75874	Isocitrate dehydrogenase [NADP] cytoplasmic	IDH1
NaN	NaN	NaN	NaN	NaN	NaN	NaN	NaN	NaN	NaN	NaN	NaN	NaN	NaN				3	3	3	5.9	5.9	5.9	61.863	0.0004025	211910000	133350000	78563000	0	1	0	1	0	0	1	0	1	0	1	1	0	1	O75879	O75879	Glutamyl-tRNA(Gln) amidotransferase subunit B, mitochondrial	PET112
0.86081	0.88805	0.87979	0.82145	0.75211	1.1188	0.57346	1.091	0.69331	0.93539	0.84258	0.98427	0.77584	0.84735				5	5	5	19.9	19.9	19.9	33.814	0	115540000000	64322000000	51214000000	4	3	3	3	2	3	3	3	4	4	3	3	4	3	O75880	O75880	Protein SCO1 homolog, mitochondrial	SCO1
NaN	NaN	NaN	NaN	0.64439	NaN	NaN	NaN	NaN	NaN	NaN	NaN	NaN	NaN				2	2	2	18.3	18.3	18.3	21	0	1732300000	1017700000	714550000	1	1	1	2	1	0	1	0	0	0	0	0	0	1	O75884;O75884-2	O75884;O75884-2	Putative hydrolase RBBP9	RBBP9
0.80116	NaN	NaN	0.81524	NaN	NaN	NaN	0.97352	0.74163	NaN	NaN	NaN	0.83377	0.69991				7	5	5	15.4	11.8	11.8	58.164	0	1913200000	1230000000	683190000	5	3	3	5	6	4	6	4	3	3	1	3	2	4	O75886;O75886-2	O75886;O75886-2	Signal transducing adapter molecule 2	STAM2
NaN	1.1333	NaN	1.1827	1.1015	NaN	NaN	1.8463	NaN	NaN	NaN	NaN	NaN	NaN				6	6	6	18.5	18.5	18.5	41.293	0	12039000000	5694200000	6345100000	2	2	1	3	3	0	1	3	2	2	1	1	1	1	O75909-1;O75909;O75909-2;O75909-4	O75909-1;O75909;O75909-2;O75909-4	Cyclin-K	CCNK
NaN	NaN	NaN	NaN	NaN	NaN	NaN	NaN	NaN	NaN	NaN	NaN	NaN	NaN				3	3	3	13.6	13.6	13.6	33.548	0	982070000	541180000	440890000	1	1	1	0	1	2	1	1	1	2	0	1	0	2	O75911	O75911	Short-chain dehydrogenase/reductase 3	DHRS3
1.0484	0.89776	0.97931	0.76187	0.72041	1.4483	0.3918	1.1203	0.78678	1.0625	1.1117	1.0685	0.71104	0.86379				6	6	6	32.4	32.4	32.4	21.614	0	58258000000	32010000000	26247000000	4	5	4	4	4	5	4	4	5	5	4	5	4	5	O75915	O75915	PRA1 family protein 3	ARL6IP5
0.74042	NaN	NaN	NaN	NaN	NaN	NaN	NaN	NaN	NaN	NaN	NaN	NaN	NaN				2	2	1	4	4	1.7	71.835	0.0013529	876510000	519240000	357270000	2	1	2	2	1	1	1	1	0	0	1	1	2	1	O75925;O75925-2	O75925;O75925-2	E3 SUMO-protein ligase PIAS1	PIAS1
1.0098	0.92628	0.91317	0.92476	0.74138	1.4821	0.71734	1.0053	0.77683	0.87607	0.89601	0.88081	0.76647	0.78344				14	14	14	62.7	62.7	62.7	26.131	0	54493000000	29379000000	25114000000	11	13	10	11	9	13	9	9	10	9	10	9	8	9	O75934	O75934	Pre-mRNA-splicing factor SPF27	BCAS2
0.90314	0.912	0.91648	0.94773	0.67275	1.3128	0.51662	1.0518	0.72298	0.80317	0.77563	0.76932	0.61512	0.65015				8	8	8	32.3	32.3	32.3	21.119	0	15998000000	8499900000	7497700000	6	7	6	6	5	7	5	3	3	2	4	2	3	2	O75935;O75935-3;O75935-2	O75935;O75935-3;O75935-2	Dynactin subunit 3	DCTN3
0.99351	0.9027	0.84366	0.91813	0.67875	1.2643	0.54185	1.0825	0.77542	0.83606	0.89583	0.89131	0.75897	0.6885				7	7	7	28.5	28.5	28.5	29.841	0	66250000000	31703000000	34547000000	5	5	5	6	7	5	5	6	6	5	6	5	6	5	O75937	O75937	DnaJ homolog subfamily C member 8	DNAJC8
0.98712	1.103	1.4762	1.1554	0.92576	1.3423	0.70039	1.0349	0.77027	0.81048	0.86528	0.82009	0.76204	0.79803				6	6	6	38.7	38.7	38.7	26.711	0	31149000000	16900000000	14249000000	5	6	5	6	5	5	6	6	6	6	6	6	6	6	O75940	O75940	Survival of motor neuron-related-splicing factor 30	SMNDC1
1.005	0.86339	0.85115	0.78998	0.70212	1.1903	0.45999	0.988	0.61053	0.79022	0.8098	0.70341	0.71337	0.67133				11	11	11	68.9	68.9	68.9	18.491	0	423080000000	236950000000	186130000000	10	10	10	10	10	10	10	9	9	9	9	10	9	9	O75947;O75947-2	O75947;O75947-2	ATP synthase subunit d, mitochondrial	ATP5H
1.0682	1.0326	0.98877	0.90616	0.77863	1.4347	0.65449	1.0321	0.76453	0.85966	0.84663	0.892	0.75329	0.70453				22	22	22	61.4	61.4	61.4	47.355	0	53296000000	28275000000	25021000000	13	11	14	10	13	11	14	11	11	10	9	13	9	13	O75955;O75955-2	O75955;O75955-2	Flotillin-1	FLOT1
1.0634	0.95392	0.94133	0.79598	0.60135	1.5712	0.64609	1.1596	0.77644	0.77243	0.83067	0.93394	0.7916	0.66074				17	17	16	7.1	7.1	6.7	346.9	0	2579400000	1396000000	1183400000	3	4	3	3	4	3	5	3	7	6	2	5	3	5	O75962;O75962-4;O75962-2;O75962-5;O75962-3	O75962;O75962-4;O75962-2;O75962-5	Triple functional domain protein	TRIO
1.0731	0.8939	0.83063	0.75861	0.66621	1.1583	0.45867	1.0487	0.5898	0.77207	0.74023	0.66342	0.68791	0.66312				8	8	8	68	68	68	11.428	0	258440000000	146600000000	111830000000	6	7	7	6	7	6	7	5	5	5	5	5	5	5	O75964	O75964	ATP synthase subunit g, mitochondrial	ATP5L
0.8335	0.96888	0.64203	0.91349	0.76556	1.1493	0.48021	NaN	NaN	NaN	NaN	0.95932	NaN	NaN				13	13	13	14.1	14.1	14.1	152.93	0	6742800000	3810100000	2932700000	4	5	3	7	6	3	6	2	2	1	0	2	0	2	O75976;O75976-2	O75976;O75976-2	Carboxypeptidase D	CPD
1.0208	0.87261	0.86938	0.89529	0.6692	1.3282	0.58628	1.0238	0.74371	0.81811	0.82035	0.90369	0.85006	0.77278				18	18	18	51.6	51.6	51.6	37.432	0	296130000000	156350000000	139780000000	15	16	15	16	16	17	14	11	14	12	13	12	11	13	O76003	O76003	Glutaredoxin-3	GLRX3
0.97037	0.86512	0.89268	0.92224	0.75382	1.3011	0.50889	0.96753	0.68159	0.84279	0.84384	0.83344	0.86914	0.76605				20	20	20	34.5	34.5	34.5	54.972	0	380050000000	198640000000	181420000000	15	15	18	16	16	17	16	14	15	13	14	13	13	14	O76021;O76021-2	O76021	Ribosomal L1 domain-containing protein 1	RSL1D1
NaN	NaN	NaN	NaN	NaN	NaN	NaN	2.0258	NaN	NaN	NaN	NaN	NaN	NaN				3	3	3	5.7	5.7	5.7	100.29	0	415200000	121240000	293960000	1	1	1	1	1	0	1	2	0	2	0	1	0	1	O76024	O76024	Wolframin	WFS1
1.0481	0.84488	0.83243	0.85834	0.65899	1.1216	0.40542	0.98512	0.66658	0.8973	0.84185	0.92383	0.86596	0.74081				20	20	20	39.3	39.3	39.3	69.223	0	64349000000	36122000000	28227000000	12	10	12	12	13	10	13	13	11	11	14	14	12	11	O76031	O76031	ATP-dependent Clp protease ATP-binding subunit clpX-like, mitochondrial	CLPX
0.9422	0.84883	0.92725	0.91006	0.74545	1.3204	0.51018	1.0085	0.79753	0.87903	0.87288	0.92778	0.83834	0.7972				8	8	8	77.2	77.2	77.2	13.331	0	323940000000	172560000000	151380000000	8	8	8	8	8	8	8	8	7	8	8	8	7	8	O76070	O76070	Gamma-synuclein	SNCG
1.0096	0.96045	0.98812	0.94327	0.82032	1.4658	0.71109	1.0983	0.80554	0.94084	0.88475	0.9703	0.8354	0.90831				12	12	12	51.3	51.3	51.3	37.84	0	40341000000	19343000000	20998000000	9	11	9	10	10	7	8	9	9	8	6	7	6	9	O76071	O76071	Probable cytosolic iron-sulfur protein assembly protein CIAO1	CIAO1
1.1954	1.0911	NaN	1.1274	0.86359	1.3817	0.81389	NaN	0.98228	1.2854	NaN	NaN	NaN	1.1953				3	3	3	37.6	37.6	37.6	12.885	0	19391000000	9924300000	9466500000	2	2	1	2	3	3	3	3	3	2	1	2	1	2	Q13068;P0CL82;Q13065;P0CL81;P0CL80;O76087;P0CL80-2;Q13070;Q13069;Q13067;A6NER3;A6NDE8;A1L429	Q13068;P0CL82;Q13065;P0CL81;P0CL80;O76087;P0CL80-2	G antigen 4;G antigen 12I;G antigen 1;G antigen 12G;G antigen 12F;G antigen 7	GAGE4;GAGE12I;GAGE1;GAGE12G;GAGE12F;GAGE7
0.95168	0.86796	0.85413	0.96292	0.73421	1.2648	0.50669	1.0151	0.69171	0.85647	0.79772	0.93347	0.70089	0.77477				22	22	2	39.5	39.5	3.1	74.605	0	110900000000	61208000000	49692000000	17	16	16	15	18	14	14	17	14	17	18	14	15	17	O76094	O76094	Signal recognition particle subunit SRP72	SRP72
NaN	NaN	NaN	NaN	NaN	NaN	NaN	NaN	NaN	NaN	NaN	NaN	NaN	NaN				1	1	1	8.9	8.9	8.9	16.358	0.00059477	268290000	254190000	14103000	0	0	1	0	1	0	0	0	0	0	1	1	1	1	O76095;O76095-2	O76095;O76095-2	Protein JTB	JTB
1.0427	0.99219	0.96362	0.9678	0.76263	1.3968	0.64437	0.97606	0.71239	0.80871	0.78262	0.81866	0.78907	0.77069				19	19	18	73.3	73.3	70.5	31.121	0	215970000000	113650000000	102320000000	15	14	12	14	13	16	14	13	12	12	11	14	12	12	O94760;O94760-2	O94760;O94760-2	N(G),N(G)-dimethylarginine dimethylaminohydrolase 1	DDAH1
NaN	NaN	NaN	NaN	NaN	NaN	NaN	NaN	NaN	NaN	NaN	NaN	NaN	NaN				3	3	3	8.2	8.2	8.2	59.832	0	594510000	417580000	176930000	1	0	1	0	1	0	0	1	1	1	1	1	0	1	O94763;O94763-2;O94763-3;O94763-4	O94763;O94763-2;O94763-3	Unconventional prefoldin RPB5 interactor 1	URI1
1.0092	1.1144	1.0527	0.80536	0.81561	1.4304	0.65415	0.99621	0.72473	0.878	0.96146	0.84223	0.83246	0.87512				30	30	25	46	46	41.5	75.022	0	149040000000	78091000000	70953000000	19	23	24	24	23	23	22	18	19	18	18	18	17	16	O94776;O94776-2	O94776;O94776-2	Metastasis-associated protein MTA2	MTA2
NaN	NaN	NaN	NaN	NaN	NaN	NaN	1.3979	NaN	NaN	NaN	NaN	NaN	NaN				10	8	8	11.8	9.7	9.7	112.13	0	3080800000	1875300000	1205500000	0	2	0	2	2	1	2	2	4	3	2	4	3	5	O94804	O94804	Serine/threonine-protein kinase 10	STK10
NaN	NaN	NaN	NaN	NaN	NaN	NaN	NaN	NaN	NaN	NaN	NaN	NaN	NaN				1	1	1	2.1	2.1	2.1	100.47	0.0046581	138750000	71197000	67556000	0	1	0	0	0	0	0	1	1	1	0	1	0	0	O94806;O94806-2	O94806;O94806-2	Serine/threonine-protein kinase D3	PRKD3
0.84341	1.1699	0.93032	0.83947	0.6426	NaN	NaN	NaN	NaN	NaN	NaN	NaN	NaN	NaN				2	2	2	13.6	13.6	13.6	15.113	0.0062546	1500800000	657340000	843500000	2	2	2	2	2	1	1	1	1	1	1	1	1	1	O94817	O94817	Ubiquitin-like protein ATG12	ATG12
NaN	0.91075	1.995	0.7582	0.60181	NaN	0.34868	1.0168	0.73959	0.8218	0.82095	0.785	0.89123	0.74309				11	11	11	8.2	8.2	8.2	200.55	0	10129000000	5584600000	4544700000	3	4	4	4	6	4	4	6	6	3	4	6	5	6	O94822;O94822-3;O94822-2	O94822;O94822-3	E3 ubiquitin-protein ligase listerin	LTN1
1.0065	0.86986	0.89177	0.84806	0.72041	1.3146	0.52241	1.0475	0.65547	0.9035	0.87038	0.83337	0.77166	0.77133				22	22	22	42.6	42.6	42.6	67.454	0	240580000000	125900000000	114680000000	20	19	19	20	19	19	20	15	17	17	19	17	18	17	O94826	O94826	Mitochondrial import receptor subunit TOM70	TOMM70A
NaN	NaN	NaN	NaN	NaN	NaN	NaN	NaN	NaN	NaN	NaN	NaN	NaN	NaN				3	3	3	4.2	4.2	4.2	108.19	0	546280000	273260000	273020000	0	1	1	1	1	0	0	1	0	1	0	1	2	2	O94829	O94829	Importin-13	IPO13
1.0141	NaN	NaN	1.085	0.83724	NaN	NaN	NaN	NaN	0.95893	0.67606	NaN	NaN	NaN				8	8	8	16.9	16.9	16.9	66.194	0	4775000000	2234200000	2540800000	4	2	5	4	4	3	2	1	4	4	2	2	1	4	O94842;O94842-3;O94842-2;O15405;O15405-2;O94900;Q96NM4;Q96NM4-3;Q96NM4-4;Q96NM4-2	O94842;O94842-3;O94842-2	TOX high mobility group box family member 4	TOX4
1.209	1.1952	0.92274	1.0738	0.65619	1.3475	0.56544	1.0166	0.70991	0.85814	0.75401	0.87517	0.72556	0.70499				17	16	16	20.7	19.3	19.3	113.01	0	40794000000	23068000000	17726000000	6	4	5	8	6	5	6	8	8	9	8	9	7	7	O94855;O94855-2	O94855;O94855-2	Protein transport protein Sec24D	SEC24D
NaN	NaN	NaN	NaN	NaN	NaN	NaN	NaN	NaN	NaN	NaN	NaN	NaN	NaN				1	1	1	4.3	4.3	4.3	46.192	0	275460000	96315000	179140000	1	1	1	1	0	0	1	1	0	0	0	0	0	0	O94864;O94864-2	O94864;O94864-2	STAGA complex 65 subunit gamma	SUPT7L
0.94675	1.0622	0.96616	0.89255	0.86147	1.7465	0.58475	1.0579	0.41015	0.62925	0.60716	NaN	NaN	0.57183				16	16	16	25.1	25.1	25.1	89.594	0	8993800000	5751400000	3242400000	7	5	6	10	5	6	4	5	4	5	5	3	3	5	O94874;O94874-2;O94874-3	O94874;O94874-2;O94874-3	E3 UFM1-protein ligase 1	UFL1
1.0474	0.94555	0.95043	1.0111	0.74166	1.3209	0.63882	0.96869	0.71774	0.74999	0.89357	0.80361	0.73059	0.70509				16	16	16	20	20	20	124.11	0	41633000000	22136000000	19497000000	8	12	11	12	12	11	12	6	8	8	8	8	7	9	O94875;O94875-9;O94875-11;O94875-12;O94875-4;O94875-10;O94875-2;O94875-3;O94875-8;O94875-7;O94875-5;O94875-6	O94875;O94875-9;O94875-11;O94875-12;O94875-4;O94875-10;O94875-2;O94875-3;O94875-8;O94875-7;O94875-5	Sorbin and SH3 domain-containing protein 2	SORBS2
0.60639	NaN	NaN	NaN	0.87631	1.6073	0.90778	0.94592	0.86176	0.94214	0.92876	1.0597	0.97761	0.92872				10	10	10	18.7	18.7	18.7	75.503	0	6221000000	3101500000	3119500000	2	3	3	2	3	5	4	4	5	4	6	3	7	6	O94880-2;O94880	O94880-2;O94880	PHD finger protein 14	PHF14
1.7076	0.80538	0.9934	1.0091	0.6389	1.076	0.45146	1.0338	0.73859	0.7821	0.88959	0.80294	0.72478	0.7125				9	9	9	26.8	26.8	26.8	54.862	0	8418700000	4341400000	4077300000	3	5	4	5	5	4	4	3	3	3	5	3	4	4	O94888	O94888	UBX domain-containing protein 7	UBXN7
1.0099	0.95249	0.9516	0.82698	0.76363	NaN	NaN	NaN	NaN	NaN	NaN	NaN	NaN	NaN				9	9	9	14.9	14.9	14.9	90.063	0	4044700000	2060000000	1984700000	4	4	3	4	5	3	3	1	3	0	2	2	2	2	O94901;O94901-5;O94901-8;O94901-9;O94901-6;O94901-3;O94901-2;O94901-7	O94901;O94901-5;O94901-8;O94901-9;O94901-6	SUN domain-containing protein 1	SUN1
NaN	1.0722	NaN	0.88339	NaN	NaN	NaN	0.92201	0.56322	0.48761	NaN	0.58725	NaN	0.46732				6	6	6	24.7	24.7	24.7	30.344	0	3795400000	2077200000	1718300000	1	3	1	4	2	1	2	3	3	3	1	2	1	3	O94903	O94903	Proline synthase co-transcribed bacterial homolog protein	PROSC
0.98509	0.90231	0.92384	0.81712	0.69585	1.1866	0.46008	0.95393	0.63323	0.78169	0.75946	0.79668	0.67159	0.58771				12	12	9	38.1	38.1	28.9	37.839	0	39743000000	20982000000	18762000000	6	8	8	8	9	10	8	8	8	8	6	9	7	8	O94905	O94905	Erlin-2	ERLIN2
1.0075	0.91071	0.95591	0.85577	0.74289	1.2318	0.6807	1.0174	0.72638	0.80476	0.88756	0.87788	0.85569	0.79058				36	36	36	45.3	45.3	45.3	106.92	0	85838000000	47167000000	38671000000	18	24	23	21	23	17	22	20	21	17	19	21	20	23	O94906;O94906-2	O94906;O94906-2	Pre-mRNA-processing factor 6	PRPF6
0.71279	0.83792	0.82208	0.88333	0.67566	1.0686	NaN	0.9482	0.90207	0.85641	0.90292	0.81442	0.81187	0.74087				7	7	7	6	6	6	173.05	0	16335000000	8985200000	7350100000	3	2	3	4	2	3	3	3	2	3	4	4	3	4	O94913	O94913	Pre-mRNA cleavage complex 2 protein Pcf11	PCF11
0.9556	1.0185	0.84937	1.0014	0.70045	1.2299	0.54419	0.95727	0.60692	0.75374	0.6945	0.73628	0.53835	0.69683				11	11	10	3.4	3.4	3.2	339.59	0	14405000000	8347100000	6058200000	5	4	5	5	6	4	6	4	5	4	4	5	4	4	O94915;O94915-2	O94915	Protein furry homolog-like	FRYL
NaN	NaN	1.0143	NaN	NaN	NaN	NaN	NaN	NaN	NaN	NaN	NaN	NaN	NaN				5	5	5	4.2	4.2	4.2	165.76	0	1092200000	290190000	802000000	0	2	2	4	4	1	0	2	2	0	1	1	0	2	O94916;O94916-2;O94916-3;O94916-4;O94916-5	O94916;O94916-2;O94916-3;O94916-4;O94916-5	Nuclear factor of activated T-cells 5	NFAT5
1.2888	NaN	NaN	1.1045	1.0552	NaN	0.50472	NaN	0.61477	NaN	0.89849	0.867	NaN	0.74821				5	5	5	15.2	15.2	15.2	55.016	0	4852000000	2892900000	1959100000	2	1	1	2	2	2	4	1	3	2	3	2	1	3	O94919	O94919	Endonuclease domain-containing 1 protein	ENDOD1
0.99121	0.80479	0.82481	0.83875	0.64755	1.1362	0.54913	1.0402	0.68247	0.86995	0.79993	0.84148	0.81802	0.82114				18	18	2	36.8	36.8	5.7	65.459	0	108100000000	59886000000	48210000000	10	12	11	11	10	14	11	12	13	13	11	10	12	11	O94925-3	O94925-3	Glutaminase kidney isoform, mitochondrial	GLS
NaN	NaN	NaN	NaN	NaN	NaN	NaN	NaN	NaN	NaN	NaN	NaN	NaN	NaN				4	4	4	7.6	7.6	7.6	71.682	0.0030217	537870000	295830000	242040000	0	0	0	0	0	0	1	1	1	2	1	0	1	2	O94927;O94927-2	O94927	HAUS augmin-like complex subunit 5	HAUS5
NaN	NaN	NaN	NaN	NaN	NaN	NaN	NaN	NaN	NaN	NaN	NaN	NaN	NaN				4	4	4	3.9	3.9	3.9	159.76	0	783930000	581260000	202680000	1	1	1	1	0	0	1	1	0	1	0	0	1	0	O94964;O94964-2;O94964-4;O94964-3	O94964;O94964-2;O94964-4	Protein SOGA1;N-terminal form;C-terminal 80 kDa form	SOGA1
0.88587	1.0451	1.2083	NaN	0.95607	1.3083	NaN	0.94192	0.63478	NaN	0.69936	NaN	NaN	0.7024				11	11	11	16	16	16	141.41	0	4069200000	2253100000	1816100000	1	2	5	2	2	3	1	4	3	5	7	2	2	4	O94966-3;O94966-4;O94966-7;O94966-6;O94966;O94966-5;O94966-2	O94966-3;O94966-4;O94966-7;O94966-6;O94966;O94966-5	Ubiquitin carboxyl-terminal hydrolase 19	USP19
0.9497	0.95438	1.0363	1.0992	0.83272	1.4661	0.65102	NaN	NaN	NaN	NaN	NaN	NaN	NaN				3	3	3	4.4	4.4	4.4	101.95	0.00040429	1384900000	740640000	644230000	2	2	2	2	2	2	2	1	1	0	2	2	2	2	O94967;O94967-2;O94967-3;O94967-4	O94967;O94967-2;O94967-3;O94967-4	WD repeat-containing protein 47	WDR47
1.0749	0.92365	1.0291	1.0688	0.7925	1.4371	0.61862	1.0387	0.68107	0.77058	0.76718	0.6481	0.92239	0.71315				28	18	1	34.4	23.1	1.4	103.96	0	28542000000	15760000000	12783000000	12	15	17	15	16	16	15	14	18	13	17	14	11	14	O94973	O94973	AP-2 complex subunit alpha-2	AP2A2
1.0203	0.91379	0.96563	0.90082	0.73849	1.266	0.54441	0.98106	0.70657	0.80163	0.78584	0.94964	0.88094	0.78223				35	35	35	32.7	32.7	32.7	133.01	0	284220000000	151320000000	132900000000	23	26	24	29	24	28	24	25	27	22	26	26	24	22	O94979;O94979-3;O94979-9;O94979-2;O94979-8;O94979-4;O94979-6;O94979-10;O94979-7;O94979-5	O94979;O94979-3;O94979-9;O94979-2;O94979-8;O94979-4;O94979-6;O94979-10;O94979-7	Protein transport protein Sec31A	SEC31A
1.0197	0.86971	0.99126	0.91642	0.75571	1.3793	0.5701	0.98535	0.87845	0.88938	0.8074	0.85564	0.75041	0.7745				16	16	15	52.6	52.6	50.4	40.623	0	50937000000	26611000000	24326000000	12	13	11	12	11	10	12	7	8	7	6	8	6	6	O94992	O94992	Protein HEXIM1	HEXIM1
NaN	NaN	NaN	NaN	NaN	0.81065	NaN	NaN	NaN	NaN	1.1783	NaN	NaN	NaN				2	2	2	3.4	3.4	3.4	101.4	0.0022757	3872000000	2258400000	1613500000	1	2	1	1	1	1	1	2	2	1	1	1	1	2	O95049;O95049-5;O95049-4;O95049-3	O95049;O95049-5;O95049-4;O95049-3	Tight junction protein ZO-3	TJP3
NaN	NaN	NaN	NaN	NaN	NaN	NaN	0.95654	NaN	NaN	NaN	NaN	NaN	NaN				2	2	2	25.8	25.8	25.8	13.693	0	1139700000	415200000	724480000	0	1	1	1	1	1	1	2	1	1	0	0	0	1	O95059	O95059	Ribonuclease P protein subunit p14	RPP14
NaN	0.95851	NaN	NaN	0.41	NaN	NaN	1.0419	0.61866	NaN	NaN	NaN	NaN	0.28002				7	7	7	23.1	23.1	23.1	45.281	0	2604000000	1742000000	861970000	4	4	2	3	3	2	2	4	3	2	4	2	0	2	O95067	O95067	G2/mitotic-specific cyclin-B2	CCNB2
NaN	NaN	NaN	NaN	NaN	1.2033	NaN	0.89945	0.80388	NaN	NaN	NaN	0.99976	NaN				3	3	3	14.7	14.7	14.7	32.011	0	3369000000	1974100000	1394900000	2	2	1	2	1	1	1	2	2	1	2	2	2	2	O95070	O95070	Protein YIF1A	YIF1A
0.95525	0.95687	0.9928	0.98591	0.74503	1.1906	0.60374	1.0069	0.71862	0.87608	0.71437	0.84938	0.69417	0.75324				45	45	45	22.9	22.9	22.9	309.35	0	22386000000	12338000000	10048000000	10	11	8	12	11	10	16	15	21	20	11	14	16	22	O95071;O95071-2	O95071;O95071-2	E3 ubiquitin-protein ligase UBR5	UBR5
NaN	NaN	NaN	NaN	NaN	NaN	NaN	NaN	0.76683	NaN	NaN	0.73118	0.78654	0.73373				4	4	4	13.1	13.1	13.1	48.962	0	2282000000	1258000000	1024100000	1	1	1	1	1	1	2	1	2	1	1	2	2	2	O95081;O95081-2	O95081;O95081-2	Arf-GAP domain and FG repeat-containing protein 2	AGFG2
NaN	0.71284	NaN	NaN	NaN	NaN	NaN	0.79738	NaN	NaN	NaN	NaN	0.61629	NaN				4	4	4	14.9	14.9	14.9	43.001	0	1173000000	721560000	451410000	1	1	1	1	1	0	1	2	2	2	1	1	2	2	O95084;O95084-2	O95084;O95084-2	Serine protease 23	PRSS23
NaN	NaN	NaN	NaN	NaN	NaN	NaN	NaN	NaN	NaN	NaN	NaN	NaN	NaN				2	2	2	3.1	3.1	3.1	125.87	0	46517000	42157000	4359800	1	0	0	0	0	0	1	1	0	0	0	0	0	0	O95104;O95104-3;O95104-2	O95104;O95104-3;O95104-2	Splicing factor, arginine/serine-rich 15	SCAF4
NaN	NaN	NaN	0.50913	0.42908	1.0783	0.40315	0.88915	0.63157	0.77641	0.73503	0.73707	0.65361	0.70075				3	3	3	27.3	27.3	27.3	15.489	0	9600300000	5352400000	4248000000	2	0	1	2	1	2	2	1	1	1	1	1	2	1	O95139;O95139-2	O95139	NADH dehydrogenase [ubiquinone] 1 beta subcomplex subunit 6	NDUFB6
NaN	NaN	0.83753	NaN	0.66003	1.0098	NaN	0.98611	NaN	NaN	NaN	NaN	NaN	NaN				4	4	4	7.8	7.8	7.8	86.401	0	621680000	297500000	324170000	2	2	1	1	2	1	0	3	2	1	2	1	0	1	O95140	O95140	Mitofusin-2	MFN2
NaN	0.72913	0.82781	0.70292	NaN	0.81506	NaN	NaN	0.56516	0.55779	0.66485	NaN	NaN	NaN				2	2	2	5.8	5.8	5.8	41.142	0.0004038	3175600000	1805300000	1370300000	1	2	2	2	1	2	0	1	2	2	2	2	2	1	O95149	O95149	Snurportin-1	SNUPN
1.071	0.90878	0.89099	0.97104	0.67032	1.08	0.65672	1.1145	NaN	0.67798	NaN	0.65133	NaN	NaN				14	14	14	14.5	14.5	14.5	146.18	0	6496600000	3603700000	2892900000	5	7	9	10	8	8	6	3	2	6	4	4	2	4	O95155;O95155-2;O95155-4;O95155-3	O95155;O95155-2;O95155-4;O95155-3	Ubiquitin conjugation factor E4 B	UBE4B
NaN	NaN	NaN	NaN	NaN	NaN	0.96258	NaN	NaN	0.98251	NaN	0.88616	0.97245	0.80644				3	3	3	12.6	12.6	12.6	34.114	0.0013548	1542000000	785600000	756430000	1	1	1	1	1	0	2	2	1	2	1	2	2	2	O95159	O95159	Zinc finger protein-like 1	ZFPL1
0.94796	1.0609	0.98165	0.9373	0.74746	1.3582	0.61016	1.0202	0.78987	0.95659	0.89862	0.98368	0.98191	0.75438				42	42	42	41.4	41.4	41.4	150.25	0	79325000000	41257000000	38068000000	19	19	20	20	21	18	22	23	24	24	24	22	25	26	O95163	O95163	Elongator complex protein 1	IKBKAP
NaN	NaN	0.49181	0.753	0.71209	NaN	NaN	NaN	NaN	NaN	NaN	NaN	NaN	NaN				2	2	2	50	50	50	9.2787	0	7588900000	4476300000	3112600000	1	1	2	2	2	2	1	1	1	1	1	1	1	1	O95167	O95167	NADH dehydrogenase [ubiquinone] 1 alpha subcomplex subunit 3	NDUFA3
1.0165	0.86348	0.83939	0.80259	0.6517	1.2037	0.6331	0.98721	0.6172	0.83278	0.82234	0.8528	0.82532	0.74291				6	6	6	49.6	49.6	49.6	15.208	0	48018000000	27687000000	20330000000	5	5	5	5	4	4	5	6	4	5	3	4	4	4	O95168;O95168-2	O95168;O95168-2	NADH dehydrogenase [ubiquinone] 1 beta subcomplex subunit 4	NDUFB4
NaN	NaN	1.1322	1.002	NaN	NaN	NaN	NaN	NaN	NaN	NaN	NaN	1.0023	0.87377				6	6	6	34.9	34.9	34.9	21.766	0	3410000000	2072800000	1337200000	4	2	3	2	4	2	2	1	2	3	2	1	3	2	O95169;O95169-3;O95169-2	O95169;O95169-3;O95169-2	NADH dehydrogenase [ubiquinone] 1 beta subcomplex subunit 8, mitochondrial	NDUFB8
NaN	0.98441	0.95912	NaN	0.71312	NaN	NaN	NaN	NaN	NaN	NaN	NaN	0.72945	NaN				1	1	1	8.6	8.6	8.6	12.058	0.0007811	1425200000	817310000	607940000	0	1	1	1	1	1	0	0	0	0	1	1	1	1	O95178	O95178	NADH dehydrogenase [ubiquinone] 1 beta subcomplex subunit 2, mitochondrial	NDUFB2
1.0641	0.60003	0.9176	0.7156	0.51467	1.0936	0.41266	1.0787	0.63487	0.83837	0.85761	1.12	0.72475	0.69641				7	7	7	64.6	64.6	64.6	12.551	0	25148000000	14221000000	10928000000	5	6	6	4	3	4	4	5	4	3	3	3	2	3	O95182	O95182	NADH dehydrogenase [ubiquinone] 1 alpha subcomplex subunit 7	NDUFA7
0.97692	0.99766	1.1194	0.76166	0.60194	1.3129	0.64485	0.96279	0.79832	0.85592	0.97403	0.92453	0.97173	0.92154				5	5	2	30.5	30.5	6.4	25.609	0	76496000000	39419000000	37076000000	3	4	3	4	4	2	4	2	2	2	2	2	2	2	O95197-3;O95197;O95197-5;O95197-4;O95197-7;O95197-2	O95197-3;O95197;O95197-5;O95197-4;O95197-7;O95197-2	Reticulon-3	RTN3
0.9556	0.84683	0.87809	0.78738	0.61471	1.2004	0.54432	0.99515	0.62412	0.85453	0.77307	0.74219	0.68172	0.75138				30	30	30	41	41	41	83.353	0	142200000000	76647000000	65557000000	23	23	26	28	29	27	24	23	23	26	24	24	19	17	O95202;O95202-2;O95202-3	O95202	LETM1 and EF-hand domain-containing protein 1, mitochondrial	LETM1
NaN	NaN	NaN	NaN	NaN	NaN	NaN	NaN	NaN	NaN	NaN	NaN	NaN	NaN				3	3	3	6.7	6.7	6.7	68.481	0	102600000	81831000	20768000	0	1	0	1	1	0	0	0	0	0	0	0	0	0	O95208;O95208-2;O95208-3;O95208-5	O95208;O95208-2;O95208-3	Epsin-2	EPN2
0.9898	0.94578	0.97859	0.91234	0.85816	1.2148	0.69226	1.032	0.68152	0.8403	0.69689	0.85821	0.7186	0.71892				9	9	9	25.2	25.2	25.2	37.404	0	50318000000	27604000000	22713000000	6	5	8	6	7	6	7	4	5	4	5	5	5	5	O95218;O95218-2	O95218;O95218-2	Zinc finger Ran-binding domain-containing protein 2	ZRANB2
NaN	NaN	NaN	NaN	NaN	NaN	NaN	NaN	NaN	NaN	NaN	NaN	NaN	NaN				2	2	2	8.3	8.3	8.3	31.293	0	1536800000	929640000	607120000	1	1	1	1	1	1	1	1	2	0	0	1	0	2	O95229;O95229-2	O95229;O95229-2	ZW10 interactor	ZWINT
0.92687	0.99339	1.0207	0.9488	0.82247	1.3247	0.58386	1.0126	0.76011	0.8783	0.95674	0.7711	0.74995	0.81894				11	11	11	23.6	23.6	23.6	51.466	0	81842000000	40828000000	41014000000	9	10	10	10	9	9	9	6	4	4	4	3	5	5	O95232;O95232-2	O95232	Luc7-like protein 3	LUC7L3
0.96198	0.83911	0.80866	0.74168	0.57895	0.99506	0.37758	1.0391	0.75809	0.84356	0.72582	0.68432	0.57565	0.52672				32	32	32	53.3	53.3	53.3	100.28	0	64610000000	37585000000	27025000000	21	23	25	22	20	18	18	18	21	19	20	22	18	17	O95235;O95235-2	O95235;O95235-2	Kinesin-like protein KIF20A	KIF20A
0.95426	0.89343	0.83813	0.76832	0.70451	1.1985	0.59978	1.0405	0.66624	0.88487	0.79445	0.82548	0.87972	0.75723				30	30	19	30.3	30.3	20.1	139.88	0	46248000000	25988000000	20259000000	15	16	15	20	15	14	16	15	14	15	13	14	16	13	O95239;O95239-2;Q6ZMV9;Q6ZMV9-3	O95239;O95239-2	Chromosome-associated kinesin KIF4A	KIF4A
1.0716	0.98869	1.1052	1.2684	0.82949	1.6652	0.44667	1.0785	0.89992	0.94742	1.0316	0.86425	1.0903	0.91738				5	4	4	3.7	3.3	3.3	208.31	0.001349	115220000000	57134000000	58087000000	1	1	1	1	1	3	1	2	2	2	3	2	2	2	O95248;O95248-4	O95248;O95248-4	Myotubularin-related protein 5	SBF1
NaN	NaN	NaN	NaN	NaN	NaN	NaN	1.6078	NaN	NaN	NaN	NaN	NaN	0.98051				4	4	4	18	18	18	28.612	0	2026900000	1271100000	755860000	1	1	0	0	0	0	0	3	1	0	2	2	0	1	O95249;O95249-2	O95249	Golgi SNAP receptor complex member 1	GOSR1
NaN	NaN	0.90202	NaN	NaN	NaN	NaN	NaN	NaN	NaN	1.0102	NaN	0.75424	0.76934				6	6	5	9.3	9.3	7.5	70.642	0.00040306	1668800000	1086200000	582530000	1	1	3	1	1	0	0	1	2	2	2	2	2	2	O95251;O95251-4;O95251-3;O95251-5;O95251-2;Q8WYB5;Q8WYB5-3;Q8WYB5-2	O95251;O95251-4;O95251-3;O95251-5;O95251-2	Histone acetyltransferase KAT7	KAT7
1.1769	1.0796	1.2847	1.0633	0.8213	1.5503	0.78211	0.9334	0.91463	0.9431	1.0892	0.825	0.82582	1.0148				5	5	5	16.6	16.6	16.6	59.09	0	8742300000	4444900000	4297400000	4	4	4	2	4	4	4	2	3	2	2	2	2	2	O95260;O95260-2	O95260;O95260-2	Arginyl-tRNA--protein transferase 1	ATE1
NaN	NaN	NaN	NaN	NaN	NaN	NaN	NaN	NaN	NaN	NaN	NaN	NaN	NaN				2	2	2	8.3	8.3	8.3	40.262	0	2568800	2568800	0	1	1	0	0	0	0	0	0	0	0	0	0	0	0	O95273;O95273-3;O95273-2	O95273;O95273-3;O95273-2	Cyclin-D1-binding protein 1	CCNDBP1
1.1068	1.1234	1.2008	0.9651	0.80056	1.5726	0.63105	NaN	0.77272	0.87574	0.91408	NaN	NaN	NaN				3	3	3	11	11	11	35.97	0	6000100000	2991300000	3008800000	2	2	2	3	2	2	2	3	2	2	2	2	2	2	O95274	O95274	Ly6/PLAUR domain-containing protein 3	LYPD3
1.0368	0.84146	0.86789	0.65317	0.71138	1.284	0.56719	1.0786	0.67985	0.87754	0.91343	0.90941	0.86956	0.80681				11	11	10	47.3	47.3	47.3	27.228	0	140980000000	75456000000	65522000000	9	7	7	6	8	7	9	7	7	7	9	8	7	8	O95292;O95292-2	O95292	Vesicle-associated membrane protein-associated protein B/C	VAPB
1.0705	0.95576	1.0427	0.97747	0.68348	1.3697	NaN	NaN	NaN	NaN	NaN	NaN	NaN	NaN				5	5	5	52.9	52.9	52.9	14.874	0	3236700000	1834400000	1402300000	3	4	4	4	3	4	4	2	1	3	2	2	2	3	O95295	O95295	SNARE-associated protein Snapin	SNAPIN
1.0715	0.95387	0.96344	0.77998	0.81332	1.4288	0.65549	0.99925	0.67703	0.81489	0.92333	0.7957	0.85269	0.8082				3	3	3	12.6	12.6	12.6	29.082	0	15772000000	8654100000	7117900000	1	2	3	2	3	2	2	2	2	2	2	2	2	2	O95297;O95297-2;O95297-3;O95297-4;O95297-5	O95297;O95297-2;O95297-3;O95297-4	Myelin protein zero-like protein 1	MPZL1
1.0545	0.97905	0.93218	0.78728	0.64801	1.0237	0.48479	1.0271	0.66412	0.79469	0.87911	0.73586	0.75665	0.67062				5	5	5	44.5	44.5	44.5	14.187	0	17916000000	10111000000	7804600000	4	4	4	4	4	3	4	2	3	3	2	2	2	2	O95298;O95298-2;E9PQ53;O95298-3	O95298;O95298-2;E9PQ53	NADH dehydrogenase [ubiquinone] 1 subunit C2;NADH dehydrogenase [ubiquinone] 1 subunit C2, isoform 2	NDUFC2;NDUFC2-KCTD14
1.1479	0.94325	0.86588	0.90835	0.71499	1.2254	0.72644	1.0211	0.57274	0.71838	0.54847	0.69658	0.5919	0.65467				10	10	10	27.6	27.6	27.6	40.75	0	41071000000	21548000000	19522000000	9	9	8	7	8	8	9	7	7	5	6	4	6	6	O95299;O95299-2	O95299;O95299-2	NADH dehydrogenase [ubiquinone] 1 alpha subcomplex subunit 10, mitochondrial	NDUFA10
1.0947	0.92621	0.85853	0.85791	0.62316	1.3738	0.61277	NaN	0.92921	0.97646	0.83471	1.1612	0.94647	0.81039				9	9	9	19.8	19.8	19.8	63.083	0	12672000000	6136400000	6535600000	3	5	4	6	3	5	6	3	4	4	3	3	4	4	O95302;O95302-3;O95302-2;Q75LS8	O95302;O95302-3	Peptidyl-prolyl cis-trans isomerase FKBP9	FKBP9
1.0096	0.98618	1.0195	0.94677	0.70594	1.3298	0.61992	1.072	0.69679	0.80175	0.80084	0.79671	0.76531	0.71964				10	10	10	49.6	49.6	49.6	27.547	0	95434000000	54137000000	41298000000	9	9	9	9	9	8	10	8	8	10	9	8	9	9	O95336	O95336	6-phosphogluconolactonase	PGLS
0.99729	0.91441	0.97044	0.89858	0.71531	1.297	0.64775	0.96213	0.71135	0.80133	0.80898	0.81063	0.83611	0.70987				31	31	30	45.1	45.1	42.8	69.5	0	257020000000	137910000000	119110000000	23	27	21	24	24	25	26	17	18	16	17	17	18	18	O95340;O95340-2	O95340;O95340-2	Bifunctional 3-phosphoadenosine 5-phosphosulfate synthase 2;Sulfate adenylyltransferase;Adenylyl-sulfate kinase	PAPSS2
1.0062	0.87482	0.87728	0.87152	0.65807	1.18	0.50707	0.97576	0.6198	0.80401	0.73497	0.78186	0.76298	0.72467				54	54	54	44.4	44.4	44.4	135.65	0	234930000000	127220000000	107700000000	34	37	34	38	36	32	31	35	30	34	33	30	28	33	O95347;O95347-2	O95347;O95347-2	Structural maintenance of chromosomes protein 2	SMC2
NaN	0.87889	NaN	0.94349	NaN	1.0941	0.53269	0.94862	0.74364	0.91362	0.88161	0.90379	0.84577	0.83243				12	12	12	26.5	26.5	26.5	77.959	0	5261900000	2839800000	2422100000	4	3	3	3	1	3	2	4	7	5	6	6	4	6	O95352;O95352-3;O95352-2	O95352;O95352-3;O95352-2	Ubiquitin-like modifier-activating enzyme ATG7	ATG7
0.96248	0.93963	1.0266	0.9853	0.77941	1.5312	0.72546	NaN	0.65894	NaN	0.73499	1.1868	0.63392	NaN				23	23	23	12.7	12.7	12.7	301.05	0	11964000000	6706200000	5258300000	8	8	9	5	8	8	10	2	7	1	8	4	2	2	O95359-3;O95359;O95359-6;O95359-1;O95359-5;O95359-2	O95359-3;O95359;O95359-6;O95359-1;O95359-5;O95359-2	Transforming acidic coiled-coil-containing protein 2	TACC2
0.95945	0.96421	0.96466	1.0485	0.83027	1.3214	0.66371	1.0283	0.70911	0.94239	0.82488	0.89759	0.74826	0.86802				19	19	19	43.4	43.4	43.4	63.954	0	21041000000	11551000000	9490000000	11	12	12	12	11	11	12	8	10	11	8	9	9	8	O95361;O95361-2;Q309B1;Q309B1-2	O95361;O95361-2	Tripartite motif-containing protein 16	TRIM16
0.94252	0.91446	0.8727	0.88541	0.70544	1.2821	0.4812	0.99558	0.88593	0.79554	1.1284	0.91631	0.72138	0.88537				8	8	8	19.7	19.7	19.7	52.356	0	9550000000	4982600000	4567400000	7	6	5	7	6	5	7	6	6	6	7	6	6	6	O95363	O95363	Phenylalanine--tRNA ligase, mitochondrial	FARS2
NaN	0.91656	NaN	0.72402	0.49775	NaN	0.6758	1.0204	NaN	0.9336	NaN	NaN	0.90266	NaN				6	6	6	17.5	17.5	17.5	61.438	0	3460700000	1961000000	1499600000	1	2	1	3	2	1	2	2	2	2	1	2	2	2	O95365	O95365	Zinc finger and BTB domain-containing protein 7A	ZBTB7A
1.0794	0.85194	1.1741	0.82027	0.66462	NaN	0.43772	0.91033	0.73743	0.84081	0.8076	1.0044	NaN	0.75299				4	4	4	22.5	22.5	22.5	24.737	0	12075000000	7072500000	5002900000	2	3	2	3	3	2	3	3	3	3	3	3	2	2	O95372	O95372	Acyl-protein thioesterase 2	LYPLA2
0.98157	0.90644	0.94687	0.96456	0.72882	1.2588	0.6583	1.0071	0.77289	0.88671	0.85506	0.91146	0.81042	0.8001				35	35	34	35.8	35.8	34.9	119.52	0	1140300000000	608960000000	531310000000	30	29	29	29	29	30	30	26	26	26	26	27	27	26	O95373	O95373	Importin-7	IPO7
NaN	NaN	1.1421	NaN	0.8408	NaN	0.7478	0.97917	0.92757	0.76299	0.80903	1.183	0.92836	0.86503				8	8	8	23.9	23.9	23.9	57.818	0	13866000000	7588800000	6276700000	2	3	4	3	3	3	3	3	4	5	4	2	3	3	O95376	O95376	E3 ubiquitin-protein ligase ARIH2	ARIH2
NaN	NaN	NaN	NaN	NaN	NaN	NaN	NaN	NaN	NaN	NaN	NaN	NaN	NaN				3	3	3	16.7	16.7	16.7	24.385	0	1240700000	690370000	550370000	2	1	2	1	0	1	1	1	1	1	0	1	0	0	O95379-4;O95379-2;O95379-3;O95379	O95379-4;O95379-2;O95379-3;O95379	Tumor necrosis factor alpha-induced protein 8	TNFAIP8
0.88253	NaN	NaN	NaN	NaN	1.465	0.78473	NaN	NaN	NaN	1.3629	NaN	NaN	NaN				9	9	9	23.4	23.4	23.4	68.386	0	1437900000	833880000	604070000	3	2	3	6	0	5	5	3	1	1	3	1	1	0	O95391	O95391	Pre-mRNA-splicing factor SLU7	SLU7
1.05	0.94779	1.0092	1.0166	0.75697	1.4938	0.61772	1.0541	0.81262	0.88963	0.8303	0.95809	0.70949	0.72089				15	15	15	29	29	29	59.851	0	39414000000	21154000000	18261000000	9	8	8	11	9	9	10	5	6	9	7	5	9	6	O95394;O95394-3;O95394-4	O95394;O95394-3;O95394-4	Phosphoacetylglucosamine mutase	PGM3
NaN	NaN	NaN	NaN	NaN	1.8134	NaN	0.93272	0.81215	0.72396	NaN	0.74667	NaN	0.71407				4	4	4	12.6	12.6	12.6	49.669	0	1399900000	707000000	692910000	1	1	0	1	1	1	1	2	3	2	2	2	2	4	O95396	O95396	Adenylyltransferase and sulfurtransferase MOCS3;Molybdopterin-synthase adenylyltransferase;Molybdopterin-synthase sulfurtransferase	MOCS3
1.0518	0.95673	1.0576	0.96651	0.81088	1.35	0.51044	1.083	0.62997	0.80006	0.76851	0.78789	0.75044	0.72508				1	1	1	6.5	6.5	6.5	14.295	0.0035647	302100000000	165550000000	136550000000	1	1	1	1	1	1	1	1	1	1	1	1	1	1	O95399;O95399-2	O95399;O95399-2	Urotensin-2	UTS2
0.94903	1.0033	1.0406	1.0427	0.80222	1.3446	0.69163	1.001	0.71655	0.85778	0.84812	0.88244	0.80207	0.73635				9	9	9	40.5	40.5	40.5	37.646	0	10196000000	5256100000	4939800000	5	4	4	7	5	5	3	4	3	4	2	2	3	4	O95400	O95400	CD2 antigen cytoplasmic tail-binding protein 2	CD2BP2
0.90018	0.83164	1.0193	0.83323	0.64884	1.3259	NaN	1.0077	0.57814	0.90598	0.63837	1.0488	1.1588	0.51684				23	23	23	15.1	15.1	15.1	247.74	0	4824500000	2942800000	1881700000	6	7	8	9	8	6	7	7	7	4	3	2	3	3	O95425;O95425-2;O95425-4;O95425-3	O95425;O95425-2;O95425-4;O95425-3	Supervillin	SVIL
0.98557	0.91172	0.99341	0.94868	0.72115	1.2614	0.60413	0.98303	0.75775	0.86048	0.85983	0.84249	0.71995	0.7752				19	19	19	66	66	66	38.274	0	206490000000	112930000000	93565000000	15	16	15	15	16	16	15	14	14	16	12	14	14	14	O95433;O95433-2	O95433;O95433-2	Activator of 90 kDa heat shock protein ATPase homolog 1	AHSA1
0.90349	0.42115	0.669	0.76382	0.63017	1.1733	0.62956	0.91139	0.55982	0.65594	0.72445	0.6871	0.62622	0.67679				14	14	14	23.5	23.5	23.5	73.45	0	9441400000	5565300000	3876100000	5	5	8	5	4	6	5	6	5	5	5	5	6	4	O95453;O95453-2;O95453-3;O95453-4	O95453;O95453-2;O95453-3;O95453-4	Poly(A)-specific ribonuclease PARN	PARN
0.98327	0.93849	0.91431	0.90604	0.69783	1.313	0.59871	1.0624	0.71359	0.78325	0.79966	0.89615	0.79614	0.69952				10	10	10	31.6	31.6	31.6	32.854	0	42902000000	23947000000	18955000000	4	4	5	4	5	5	6	8	6	8	7	7	7	8	O95456;O95456-2	O95456;O95456-2	Proteasome assembly chaperone 1	PSMG1
NaN	NaN	NaN	0.92004	0.57934	NaN	NaN	1.0654	0.72942	0.81003	0.76001	NaN	0.67757	0.82608				8	8	8	10	10	10	121.85	0	4047800000	2155000000	1892800000	2	2	2	3	2	1	0	5	4	5	5	4	4	3	O95466;O95466-2;O95466-3	O95466;O95466-2;O95466-3	Formin-like protein 1	FMNL1
1.0068	1.1406	1.1428	0.94172	NaN	1.2413	NaN	1.2308	0.67407	NaN	0.88075	1.0167	0.66584	0.77754				7	7	7	21.1	21.1	21.1	63.523	0	5897800000	3289600000	2608200000	3	4	3	3	3	3	4	4	2	3	3	3	2	2	O95470	O95470	Sphingosine-1-phosphate lyase 1	SGPL1
NaN	NaN	NaN	NaN	NaN	NaN	NaN	1.0228	0.60002	0.80906	0.81482	0.82209	0.68525	NaN				6	6	6	25.4	25.4	25.4	30.065	0	3393300000	2095100000	1298300000	1	1	2	1	1	1	1	3	5	2	2	3	3	1	O95478	O95478	Ribosome biogenesis protein NSA2 homolog	NSA2
1.0989	0.81123	NaN	NaN	0.53328	1.3667	NaN	NaN	NaN	NaN	0.77322	NaN	NaN	0.61491				14	12	12	14.5	13.1	13.1	119.75	0	4830800000	2877800000	1953000000	3	3	5	6	4	4	5	8	3	4	5	5	2	8	O95486;O95486-2	O95486	Protein transport protein Sec24A	SEC24A
0.98813	0.99351	0.92924	0.94958	0.75536	1.314	0.52766	1.0608	0.70539	0.7865	0.77224	0.80805	0.73943	0.62841				15	15	13	14.9	14.9	13.6	137.42	0	10045000000	5515500000	4529400000	6	4	6	4	4	5	4	9	6	7	9	9	8	8	O95487;O95487-2;O95487-3	O95487;O95487-2;O95487-3	Protein transport protein Sec24B	SEC24B
NaN	NaN	NaN	NaN	NaN	NaN	NaN	NaN	NaN	NaN	NaN	NaN	NaN	NaN				1	1	1	4.5	4.5	4.5	49.228	0.0062581	256870000	172430000	84438000	0	0	0	0	0	0	0	1	1	0	0	0	0	0	O95544	O95544	NAD kinase	NADK
0.87592	0.82845	0.91189	0.93266	0.75052	NaN	NaN	NaN	NaN	0.77715	NaN	0.8169	NaN	NaN				5	5	5	20.4	20.4	20.4	40.929	0	13114000000	6736000000	6378000000	1	1	3	3	2	1	3	2	1	3	1	2	1	1	O95551;O95551-2;O95551-3	O95551;O95551-2;O95551-3	Tyrosyl-DNA phosphodiesterase 2	TDP2
NaN	0.95245	NaN	NaN	0.8101	1.1482	NaN	0.991	0.81709	1.4445	1.5179	1.2895	0.94522	0.75093				3	3	3	29.1	29.1	29.1	14.279	0	5143600000	2800500000	2343000000	2	2	1	2	2	2	1	2	3	2	3	2	3	2	O95563	O95563	Mitochondrial pyruvate carrier 2	MPC2
NaN	NaN	NaN	NaN	NaN	1.6823	NaN	1.221	0.71904	0.73372	0.79253	0.92226	0.85378	0.74615				6	6	6	32.7	32.7	32.7	27.873	0	7897400000	4562700000	3334700000	1	1	1	2	1	2	2	3	4	3	3	2	2	4	O95571	O95571	Persulfide dioxygenase ETHE1, mitochondrial	ETHE1
0.96114	1.0472	1.0916	0.80391	0.78304	1.4194	0.61031	1.0345	0.64754	0.79267	0.86868	0.77312	0.73901	0.75119				25	25	23	45.6	45.6	44	80.419	0	145940000000	79697000000	66246000000	15	14	16	14	14	13	12	18	17	18	18	17	18	17	O95573	O95573	Long-chain-fatty-acid--CoA ligase 3	ACSL3
0.993	1.0509	1.0404	1.0289	0.7861	1.3804	0.78585	0.91414	0.75006	0.78086	0.75562	0.89296	0.78426	0.71294				27	27	27	22.6	22.6	22.6	194.81	0	14406000000	7631700000	6774100000	11	12	12	14	11	12	9	10	13	11	9	13	10	9	O95602	O95602	DNA-directed RNA polymerase I subunit RPA1	POLR1A
NaN	NaN	NaN	NaN	NaN	NaN	NaN	NaN	NaN	NaN	NaN	NaN	NaN	NaN				8	8	8	2.8	2.8	2.8	378.03	0	441820000	218870000	222950000	0	2	1	1	0	1	1	1	0	0	0	1	1	2	O95613;O95613-2	O95613;O95613-2	Pericentrin	PCNT
0.69824	NaN	NaN	NaN	0.55662	NaN	0.4369	NaN	NaN	NaN	NaN	NaN	NaN	NaN				3	3	3	14.1	14.1	14.1	26.499	0	3375700000	2154600000	1221100000	2	3	2	2	2	1	2	1	2	2	1	1	2	2	O95619	O95619	YEATS domain-containing protein 4	YEATS4
NaN	NaN	NaN	NaN	0.43361	1.3952	0.53682	1.0594	0.76191	0.96124	0.79747	0.83984	0.65974	0.72445				8	8	8	16.7	16.7	16.7	70.338	0	6254900000	3425000000	2829900000	2	2	0	1	3	4	2	3	2	2	3	3	3	3	O95628-8;O95628-4;O95628-9;O95628-10;O95628;O95628-3;O95628-2;O95628-7;O95628-6;O95628-5	O95628-8;O95628-4;O95628-9;O95628-10;O95628;O95628-3;O95628-2;O95628-7;O95628-6;O95628-5	CCR4-NOT transcription complex subunit 4	CNOT4
1.0144	0.87353	0.95207	0.94563	0.68504	1.4392	0.597	1.1382	0.66149	0.84979	0.70514	0.88884	NaN	0.87179				12	12	12	34.4	34.4	34.4	48.076	0	7491400000	3724300000	3767100000	3	5	5	6	3	5	5	4	3	3	5	4	1	3	O95630;O95630-2	O95630;O95630-2	STAM-binding protein	STAMBP
NaN	1.1804	0.82992	1.0506	0.8913	NaN	0.80302	1.055	0.97995	1.2824	NaN	1.4024	1.1539	1.2797				6	6	6	42.6	42.6	42.6	24.96	0	6366400000	3014300000	3352100000	1	2	1	5	3	2	3	2	5	4	2	3	3	4	O95633-2;O95633	O95633-2;O95633	Follistatin-related protein 3	FSTL3
1.0594	0.88465	0.86585	0.93519	0.63102	1.1427	NaN	NaN	NaN	NaN	NaN	NaN	NaN	NaN				4	4	4	20.1	20.1	20.1	30.255	0	1828400000	1143400000	684920000	2	2	2	2	2	2	3	1	1	1	1	0	1	2	O95639;O95639-3;O95639-2	O95639;O95639-3;O95639-2	Cleavage and polyadenylation specificity factor subunit 4	CPSF4
NaN	NaN	1.0145	0.94863	NaN	0.87317	NaN	NaN	0.80854	0.91159	NaN	NaN	NaN	NaN				5	5	5	12.2	12.2	12.2	68.856	0	5895400000	3482200000	2413200000	2	3	3	5	3	3	3	1	2	2	1	1	2	1	O95671;O95671-2;O95671-3	O95671;O95671-2;O95671-3	N-acetylserotonin O-methyltransferase-like protein	ASMTL
NaN	0.88247	0.94396	0.77831	0.74315	1.2697	NaN	1.1204	0.96031	0.94241	1.1147	0.78365	0.78661	0.76858				2	2	2	3.2	3.2	3.2	87.79	0.0015343	7371400000	3917600000	3453800000	2	2	2	1	1	2	1	1	1	1	1	1	1	1	O95672;O95672-2	O95672;O95672-2	Endothelin-converting enzyme-like 1	ECEL1
NaN	NaN	NaN	NaN	NaN	NaN	NaN	NaN	NaN	NaN	NaN	NaN	NaN	NaN				4	4	4	16	16	16	43.064	0	405250000	107920000	297330000	0	2	3	2	1	2	1	1	1	1	1	1	1	1	O95684;O95684-2;Q8N103-3	O95684;O95684-2	FGFR1 oncogene partner	FGFR1OP
NaN	NaN	NaN	NaN	NaN	NaN	NaN	NaN	NaN	NaN	NaN	NaN	NaN	NaN				3	3	3	13.4	13.4	13.4	32.559	0	339320000	158620000	180700000	0	0	0	0	0	0	0	1	1	1	2	1	1	3	O95685	O95685	Protein phosphatase 1 regulatory subunit 3D	PPP1R3D
0.84082	0.98949	0.94626	0.88913	0.73577	NaN	0.72936	0.99686	0.71097	0.96385	0.81235	0.83651	0.93572	0.80909				5	5	5	26.8	26.8	26.8	25.424	0	5926800000	3304000000	2622700000	3	3	2	3	3	1	4	2	2	2	3	1	2	2	O95707	O95707	Ribonuclease P protein subunit p29	POP4
0.89383	NaN	0.91191	0.95859	NaN	1.2144	NaN	0.81758	NaN	0.93578	0.87493	0.78733	0.6177	0.70363				11	11	9	3.1	3.1	2.5	527.22	0	24716000000	12518000000	12198000000	3	1	3	4	2	5	0	3	1	3	2	3	3	5	O95714	O95714	E3 ubiquitin-protein ligase HERC2	HERC2
1.2482	1.0113	1.1925	0.94323	0.93526	1.4492	0.81804	1.2131	0.75419	0.80686	0.91942	1.0571	NaN	0.74233				9	9	9	46.9	46.9	46.9	28.97	0	9432100000	5004200000	4427900000	4	5	5	6	6	5	5	3	6	5	4	5	3	4	O95721	O95721	Synaptosomal-associated protein 29	SNAP29
0.99537	1.0057	0.98863	0.9527	0.67143	1.2996	0.57375	1.0144	0.70878	0.85702	0.82733	0.78647	0.67005	0.72277				16	16	16	38.7	38.7	38.7	58.022	0	50014000000	27011000000	23003000000	12	11	11	12	13	12	13	9	10	8	8	9	9	8	O95747;Q9UEW8;Q9UEW8-2	O95747	Serine/threonine-protein kinase OSR1	OXSR1
0.96074	1.0704	0.93693	0.93047	0.76819	NaN	0.52028	NaN	NaN	NaN	NaN	NaN	NaN	NaN				3	3	3	9.7	9.7	9.7	34.87	0.0004051	2323600000	1120400000	1203200000	3	3	3	3	3	2	2	1	1	1	0	0	0	0	O95749;O95749-2	O95749;O95749-2	Geranylgeranyl pyrophosphate synthase	GGPS1
1.0012	1.0047	0.99659	1.0146	0.76498	1.3882	0.60901	1.0098	0.7797	0.83447	0.85985	0.81076	0.80793	0.77961				38	35	35	50.5	45.3	45.3	94.511	0	186430000000	99483000000	86945000000	30	27	27	28	29	30	28	22	24	28	26	25	23	26	O95757	O95757	Heat shock 70 kDa protein 4L	HSPA4L
NaN	NaN	1.0835	1.0196	1.1411	0.90365	NaN	1.0493	0.72903	0.85776	NaN	0.98323	1.2458	0.88235				11	8	8	24.3	19.7	19.7	59.689	0	8079800000	4483400000	3596400000	7	5	6	8	7	7	7	8	7	8	6	7	8	9	O95758;O95758-2;O95758-1;O95758-6;O95758-5;O95758-4;O95758-7	O95758;O95758-2;O95758-1;O95758-6;O95758-5;O95758-4;O95758-7	Polypyrimidine tract-binding protein 3	PTBP3
0.9084	0.99139	0.9003	0.85273	0.73304	1.347	0.50538	1.018	0.82389	0.90138	0.95617	0.86887	0.96753	1.0439				6	6	6	55.2	55.2	55.2	10.403	0	65468000000	34623000000	30844000000	4	4	4	4	5	4	4	5	6	5	5	5	5	6	O95777	O95777	N-alpha-acetyltransferase 38, NatC auxiliary subunit	NAA38
0.99184	0.90441	0.92124	0.93363	0.71942	1.2627	0.58236	1.0172	0.69292	0.79078	0.80902	0.85866	0.72993	0.69073				36	36	26	42.3	42.3	31.4	107.54	0	227220000000	121820000000	105390000000	19	24	23	24	21	24	20	26	27	27	28	26	27	27	O95782;O95782-2	O95782;O95782-2	AP-2 complex subunit alpha-1	AP2A1
NaN	1.6089	1.8861	1.8227	0.56564	NaN	0.63843	0.96564	0.67856	0.9274	0.88247	NaN	0.85251	0.81265				8	8	8	6.1	6.1	6.1	178.67	0	3334500000	1605700000	1728800000	0	2	4	2	3	1	2	3	3	4	4	3	3	5	O95785;O95785-2;O95785-4;O95785-3	O95785;O95785-2;O95785-4;O95785-3	Protein Wiz	WIZ
NaN	NaN	0.97695	NaN	NaN	NaN	NaN	NaN	NaN	NaN	NaN	NaN	NaN	NaN				2	2	2	2.5	2.5	2.5	106.6	0.0075216	505860000	279570000	226290000	1	0	1	0	1	0	1	0	1	0	0	0	0	0	O95786;O95786-2	O95786;O95786-2	Probable ATP-dependent RNA helicase DDX58	DDX58
1.0397	0.87962	0.86893	0.8046	0.70814	1.0644	NaN	1.0855	0.66815	0.69093	NaN	0.84363	0.71294	0.70262				7	7	7	23.8	23.8	23.8	44.678	0	11041000000	6128000000	4913400000	4	4	7	5	6	3	2	5	5	5	1	4	3	3	O95801	O95801	Tetratricopeptide repeat protein 4	TTC4
NaN	NaN	NaN	NaN	NaN	NaN	NaN	NaN	NaN	NaN	NaN	NaN	NaN	NaN				1	1	1	5.1	5.1	5.1	17.4	0.0030206	0	0	0	0	1	1	1	0	1	1	1	1	1	0	1	1	1	O95807	O95807	Transmembrane protein 50A	TMEM50A
0.93177	0.84138	0.93706	0.96067	0.6815	1.2319	0.77861	0.9851	0.95142	1.0183	0.92764	1.0055	0.89669	0.88555				16	16	16	74.4	74.4	74.4	23.772	0	203730000000	102220000000	101510000000	10	10	11	11	10	12	10	10	11	13	9	12	10	10	O95816;O95816-2	O95816;O95816-2	BAG family molecular chaperone regulator 2	BAG2
1.0043	0.89043	1.0408	1.0449	0.99155	1.3896	0.69706	1.0587	0.85439	1.0502	0.98446	1.1718	1.083	0.98883				27	27	27	75.1	75.1	75.1	61.594	0	120000000000	58501000000	61497000000	15	17	18	20	21	18	21	17	15	15	19	16	14	18	O95817	O95817	BAG family molecular chaperone regulator 3	BAG3
1.0499	1.0194	0.81425	1.1581	0.82338	1.5284	0.87197	1.3606	1.0219	1.2915	0.76871	0.63086	1.5305	1.0345				14	14	8	13.2	13.2	9.3	150.91	0	6278300000	3119500000	3158700000	3	3	5	5	5	3	4	3	4	3	3	4	2	4	O95819-3;O95819;O95819-5;O95819-4;O95819-2	O95819-3;O95819;O95819-5;O95819-4;O95819-2	Mitogen-activated protein kinase kinase kinase kinase 4	MAP4K4
NaN	NaN	NaN	0.96198	0.72871	1.1556	NaN	NaN	NaN	0.91319	0.88944	0.93647	0.77898	0.88818				4	4	4	14.3	14.3	14.3	38.696	0	4373700000	2507500000	1866200000	2	0	2	3	2	2	0	2	2	2	2	2	2	1	O95825;O95825-2	O95825;O95825-2	Quinone oxidoreductase-like protein 1	CRYZL1
1.0124	0.88034	0.90081	0.85256	0.68376	1.2406	0.47133	1.0045	0.62167	0.76128	0.75559	0.73335	0.69476	0.64762				28	28	28	52.9	52.9	52.9	66.9	0	524840000000	297010000000	227830000000	23	23	20	20	19	24	20	17	20	19	19	16	17	17	O95831;O95831-3;O95831-2;O95831-6;O95831-4;O95831-5	O95831;O95831-3;O95831-2	Apoptosis-inducing factor 1, mitochondrial	AIFM1
NaN	NaN	NaN	NaN	NaN	NaN	NaN	NaN	NaN	NaN	NaN	NaN	NaN	NaN				3	3	3	20.8	20.8	20.8	26.648	0	753770000	338540000	415240000	1	0	0	0	0	1	0	1	1	1	1	0	2	1	O95833	O95833	Chloride intracellular channel protein 3	CLIC3
0.99684	1.0404	0.86889	1.071	0.73801	1.1663	0.82954	1.0724	0.76143	0.8895	0.8517	1.1307	0.77716	0.81111				23	23	22	37.6	37.6	36.6	86.47	0	64849000000	34174000000	30675000000	14	12	10	13	16	11	11	11	15	13	15	12	14	13	O95834-2;O95834-3;O95834;O00423;O00423-3	O95834-2;O95834-3;O95834	Echinoderm microtubule-associated protein-like 2	EML2
NaN	NaN	NaN	0.8153	0.75098	1.206	NaN	1.1019	0.69732	NaN	NaN	NaN	0.67706	0.75382				3	3	2	15.7	15.7	10.8	22.147	0	3904900000	2076200000	1828700000	1	2	1	2	3	2	1	3	2	1	2	1	2	2	O95857	O95857	Tetraspanin-13	TSPAN13
0.91148	0.78647	0.91077	0.88775	0.66954	1.2426	0.60077	1.0875	0.74282	0.81929	0.78939	0.79189	0.83646	0.71864				18	18	18	66.6	66.6	66.6	33.392	0	88313000000	47978000000	40335000000	12	13	13	12	14	12	13	11	12	11	12	13	11	11	O95861;O95861-4;O95861-2;O95861-3	O95861;O95861-4;O95861-2;O95861-3	3(2),5-bisphosphate nucleotidase 1	BPNT1
NaN	NaN	NaN	NaN	NaN	NaN	NaN	0.92887	0.7486	1.0052	0.89196	NaN	1.3389	1.1954				7	6	6	36.5	33.7	33.7	29.644	0	2827200000	1320700000	1506500000	4	3	3	1	1	3	3	6	6	3	4	3	3	3	O95865	O95865	N(G),N(G)-dimethylarginine dimethylaminohydrolase 2	DDAH2
NaN	NaN	NaN	NaN	NaN	NaN	NaN	NaN	NaN	NaN	NaN	NaN	NaN	NaN				5	5	5	12.7	12.7	12.7	63.243	0	1068200000	576070000	492140000	0	1	1	1	0	0	0	0	3	2	4	1	2	2	O95870;O95870-2	O95870;O95870-2	Abhydrolase domain-containing protein 16A	ABHD16A
0.99509	0.93489	0.88221	0.94932	0.74542	1.3802	0.59954	1.0337	0.73353	0.79631	0.82127	0.9129	0.74115	0.90854				7	7	7	47.7	47.7	47.7	19.206	0	69590000000	37152000000	32438000000	6	6	6	6	5	5	7	6	7	5	6	5	4	6	O95881	O95881	Thioredoxin domain-containing protein 12	TXNDC12
NaN	NaN	NaN	NaN	NaN	NaN	NaN	NaN	NaN	NaN	NaN	NaN	NaN	NaN				5	5	5	21.5	21.5	21.5	36.694	0	2379900000	1624300000	755690000	0	1	2	2	2	1	0	1	0	1	1	1	1	1	O95900;O95900-2	O95900;O95900-2	Probable tRNA pseudouridine synthase 2	TRUB2
1.0578	0.98242	0.98856	0.90324	0.72891	1.3372	NaN	1.1339	0.83611	0.86467	0.69867	0.96787	0.7037	0.67872				9	9	9	16.1	16.1	16.1	72.757	0	15361000000	8662000000	6698700000	4	4	4	3	4	3	3	5	4	5	3	7	2	4	O95905;O95905-3;O95905-2	O95905;O95905-3;O95905-2	Protein SGT1	ECD
0.78505	0.81268	0.79735	0.76154	0.6351	NaN	0.49557	NaN	NaN	0.73561	NaN	NaN	NaN	0.70954				5	4	4	18.2	15.8	15.8	32.844	0	4372800000	2337500000	2035300000	1	2	1	1	1	0	1	2	1	2	2	2	1	1	O95983;O95983-2	O95983;O95983-2	Methyl-CpG-binding domain protein 3	MBD3
NaN	NaN	NaN	NaN	NaN	NaN	NaN	NaN	NaN	NaN	NaN	NaN	0.73281	NaN				5	5	4	7.7	7.7	6.4	96.661	0	1227000000	932140000	294860000	0	3	1	0	2	0	1	1	1	1	2	2	3	3	O95985;O95985-3;O95985-2	O95985;O95985-3;O95985-2	DNA topoisomerase 3-beta-1	TOP3B
NaN	0.83005	NaN	NaN	NaN	NaN	NaN	NaN	NaN	NaN	NaN	NaN	NaN	0.73846				3	3	3	26.2	26.2	26.2	19.471	0	1007800000	549070000	458730000	1	1	1	2	1	1	1	1	2	2	2	1	1	2	O95989	O95989	Diphosphoinositol polyphosphate phosphohydrolase 1	NUDT3
0.95548	0.86647	0.93797	0.91134	0.71537	1.188	0.65337	1.0492	0.70819	0.83104	0.97474	0.88591	0.78031	0.66945				3	3	3	22.3	22.3	22.3	19.979	0	48857000000	26318000000	22539000000	2	2	2	2	2	2	2	3	3	3	3	3	3	3	O95994;Q8TD06	O95994	Anterior gradient protein 2 homolog	AGR2
NaN	NaN	NaN	NaN	NaN	NaN	NaN	NaN	NaN	NaN	NaN	NaN	NaN	NaN				3	3	3	16.3	16.3	16.3	22.024	0	513710000	321180000	192530000	3	1	2	1	0	1	0	2	1	0	1	0	0	0	O95997;Q9NZH5;Q9NZH5-2;Q9NZH4	O95997;Q9NZH5;Q9NZH5-2	Securin;Securin-2	PTTG1;PTTG2
0.96398	0.98148	0.97934	1.0273	0.9663	1.3385	0.7811	1.1125	0.73085	NaN	0.8711	0.8781	0.75345	0.76218				8	8	8	43.8	43.8	43.8	26.251	0	10018000000	5292800000	4725200000	2	5	3	3	4	3	4	3	3	5	5	5	4	4	O95999	O95999	B-cell lymphoma/leukemia 10	BCL10
0.97982	0.89218	1.0432	0.75528	0.67422	1.0962	0.56962	1.0544	0.6831	0.84501	0.86763	0.80009	1.0881	0.69998				15	15	15	68	68	68	20.776	0	102720000000	58600000000	44122000000	10	10	11	12	9	11	10	12	9	9	10	8	7	8	O96000;O96000-2	O96000;O96000-2	NADH dehydrogenase [ubiquinone] 1 beta subcomplex subunit 10	NDUFB10
NaN	0.81789	0.79299	0.70364	0.72963	NaN	NaN	0.99016	0.80295	0.99288	0.51889	1.2536	0.57536	0.70274				8	8	8	18.2	18.2	18.2	76.096	0	12636000000	7178700000	5457200000	1	2	2	2	3	2	2	6	5	4	5	5	5	5	O96005;O96005-4;O96005-3	O96005;O96005-4;O96005-3	Cleft lip and palate transmembrane protein 1	CLPTM1
1.0671	NaN	NaN	0.99192	0.75373	1.4744	NaN	1.0775	0.62113	0.85583	NaN	0.89895	NaN	NaN				7	7	7	14.6	14.6	14.6	78.155	0	4042100000	2177800000	1864200000	2	2	1	2	3	2	2	2	2	4	2	3	2	2	O96006	O96006	Zinc finger BED domain-containing protein 1	ZBED1
0.99281	1.0858	1.058	1.2216	0.88728	1.6852	NaN	NaN	NaN	0.98307	0.90319	NaN	0.70763	NaN				4	4	4	33	33	33	20.944	0	3520000000	1752700000	1767300000	2	4	2	2	2	2	1	2	1	2	2	2	2	2	O96007	O96007	Molybdopterin synthase catalytic subunit	MOCS2
0.93328	0.84635	0.90707	0.87136	0.65367	1.143	0.78646	1.0205	0.69799	0.87671	0.83707	0.82559	0.66942	0.72296				10	10	10	43.5	43.5	43.5	37.893	0	117280000000	63315000000	53961000000	8	7	8	7	7	7	8	6	7	5	7	6	7	6	O96008;O96008-2	O96008;O96008-2	Mitochondrial import receptor subunit TOM40 homolog	TOMM40
NaN	NaN	NaN	NaN	NaN	NaN	NaN	NaN	NaN	NaN	NaN	NaN	NaN	NaN				3	3	3	8.3	8.3	8.3	64.071	0	2430700000	1258900000	1171700000	1	1	1	1	1	1	1	1	1	1	2	1	1	2	O96013;O96013-2;O96013-3;O96013-4	O96013	Serine/threonine-protein kinase PAK 4	PAK4
NaN	NaN	NaN	NaN	NaN	NaN	NaN	1.0008	0.89596	NaN	1.0978	0.95701	0.90649	0.75662				5	5	5	16.8	16.8	16.8	60.914	0	1702400000	981270000	721120000	0	0	0	0	0	0	1	3	2	3	3	5	3	4	O96017;O96017-9;O96017-13;O96017-4;O96017-12;O96017-11;O96017-8;O96017-7;O96017-3;O96017-6;O96017-5;O96017-2	O96017;O96017-9;O96017-13;O96017-4;O96017-12	Serine/threonine-protein kinase Chk2	CHEK2
1.0351	1.0028	1.0024	0.92955	0.78459	1.3377	0.58219	1.0301	0.68985	0.76334	0.81107	0.7391	0.81663	0.71917				13	13	11	31.5	31.5	26.3	47.46	0	98037000000	57403000000	40635000000	10	10	12	12	10	10	10	8	7	8	5	7	5	7	O96019;O96019-2	O96019;O96019-2	Actin-like protein 6A	ACTL6A
NaN	NaN	NaN	NaN	NaN	NaN	NaN	1.1535	0.77202	0.92253	0.92844	0.94653	1.0964	NaN				10	10	10	10.6	10.6	10.6	152.26	0	2004700000	1168600000	836090000	0	1	1	3	2	0	2	5	4	3	5	4	3	1	O96028;O96028-2;O96028-5;O96028-6;O96028-4;O96028-3;O96028-7	O96028;O96028-2	Histone-lysine N-methyltransferase NSD2	WHSC1
0.99043	0.912	0.8997	0.9597	0.78876	1.2746	0.6532	1.017	0.74088	0.84683	0.7891	0.86595	0.79723	0.76427				25	25	23	69	69	69	36.688	0	5096300000000	2702000000000	2394300000000	21	21	20	22	22	21	21	17	17	20	18	18	18	18	P00338;P00338-3;P00338-5;P00338-2;P00338-4;Q6ZMR3	P00338;P00338-3;P00338-5;P00338-2;P00338-4	L-lactate dehydrogenase A chain	LDHA
1.01	0.85602	0.86979	0.85376	0.6512	1.1509	0.47453	0.98449	0.65187	0.81793	0.84738	0.82778	0.74409	0.71484				27	27	27	52.2	52.2	52.2	61.397	0	366380000000	208910000000	157470000000	23	23	24	22	24	24	24	20	19	20	19	19	18	19	P00367;P00367-3;P49448;P00367-2	P00367;P00367-3;P49448;P00367-2	Glutamate dehydrogenase 1, mitochondrial;Glutamate dehydrogenase 2, mitochondrial	GLUD1;GLUD2
1.0352	0.90327	0.90346	0.96791	0.70786	1.4134	0.56775	1.0911	0.70958	0.79637	0.7256	0.81173	0.78704	0.69223				11	11	11	65.8	65.8	65.8	21.452	0	38961000000	21387000000	17574000000	7	8	7	7	7	6	7	5	6	6	5	6	5	6	P00374;P00374-2;Q86XF0	P00374;P00374-2	Dihydrofolate reductase	DHFR
0.97663	0.78687	0.94684	0.75692	0.69581	1.2652	0.6605	1.024	0.70816	0.82067	0.91601	0.88024	0.74353	0.77764				16	16	16	65.4	65.4	65.4	34.234	0	275250000000	144510000000	130740000000	10	10	11	10	10	9	10	10	11	8	10	8	8	9	P00387;P00387-2;P00387-3	P00387;P00387-2;P00387-3	NADH-cytochrome b5 reductase 3;NADH-cytochrome b5 reductase 3 membrane-bound form;NADH-cytochrome b5 reductase 3 soluble form	CYB5R3
1.0625	0.90787	1.0071	0.90087	0.72015	1.355	0.70241	1.0169	0.76463	0.93304	0.87401	0.92534	0.79206	0.80423				19	19	19	57.1	57.1	57.1	56.256	0	158320000000	83531000000	74789000000	12	15	15	12	9	13	11	11	15	15	13	14	14	13	P00390;P00390-2;P00390-3;P00390-4;P00390-5	P00390;P00390-2;P00390-3;P00390-4;P00390-5	Glutathione reductase, mitochondrial	GSR
0.93262	0.86318	1.0256	0.8562	0.59986	1.1572	0.45603	1.0271	0.65299	0.80821	0.84758	0.7758	0.67888	0.72472				7	7	7	30.8	30.8	30.8	25.565	0	176510000000	97156000000	79357000000	4	4	5	4	5	5	5	5	7	6	5	5	5	6	P00403	P00403	Cytochrome c oxidase subunit 2	MT-CO2
NaN	NaN	NaN	NaN	NaN	NaN	NaN	1.0367	0.88799	1.0867	1.2794	1.056	1.203	0.93589				1	1	1	5.4	5.4	5.4	29.95	0	19131000000	9314600000	9816000000	0	0	0	0	1	0	0	1	1	1	1	1	1	1	P00414	P00414	Cytochrome c oxidase subunit 3	MT-CO3
0.9884	0.87231	0.88105	0.89355	0.65914	1.1465	0.58839	1.0167	0.73093	0.87227	0.93839	0.92033	0.77639	0.81408				9	9	9	72.7	72.7	72.7	15.936	0	603110000000	286270000000	316840000000	8	7	7	8	8	6	8	6	6	6	6	6	8	6	P00441	P00441	Superoxide dismutase [Cu-Zn]	SOD1
1.0074	1.0092	1.0806	1.0369	0.76806	1.5625	0.72171	1.0088	0.72333	0.81389	0.76746	0.8334	0.75589	0.7687				16	16	16	77.5	77.5	77.5	32.118	0	311480000000	167520000000	143960000000	13	13	13	14	14	14	13	14	13	14	15	14	13	12	P00491	P00491	Purine nucleoside phosphorylase	PNP
1.0239	0.93087	0.92123	0.92251	0.67476	1.3912	0.66866	1.0402	0.67491	0.77621	0.76852	0.82039	0.81517	0.70041				12	12	11	62.4	62.4	59.2	24.579	0	200880000000	105410000000	95471000000	10	11	10	10	11	12	11	8	8	10	10	11	10	10	P00492	P00492	Hypoxanthine-guanine phosphoribosyltransferase	HPRT1
0.98488	0.86198	0.85677	0.81215	0.64162	1.1997	0.49349	0.98598	0.67434	0.84425	0.78473	0.83789	0.77543	0.7674				24	24	24	58.6	58.6	58.6	47.517	0	1286700000000	709510000000	577170000000	22	23	22	22	21	22	21	18	20	20	20	19	18	21	P00505;P00505-2	P00505;P00505-2	Aspartate aminotransferase, mitochondrial	GOT2
0.98236	0.9576	1.0713	0.81868	0.79858	1.2736	0.52469	1.0915	0.82588	0.85058	0.93916	0.82259	0.78414	0.79315				31	31	29	32.1	32.1	30.2	134.28	0	82477000000	46086000000	36391000000	15	14	15	20	21	18	20	17	18	19	18	20	18	15	P00533;P00533-4;P00533-3;P00533-2	P00533;P00533-4;P00533-3	Epidermal growth factor receptor	EGFR
1.006	0.92407	0.9177	0.94364	0.67917	1.3045	0.60715	1.012	0.72203	0.81825	0.80522	0.84512	0.80391	0.7603				31	31	26	73.4	73.4	64.7	44.614	0	5900700000000	3164000000000	2736700000000	30	29	29	30	29	29	29	26	25	25	25	25	24	25	P00558;P00558-2	P00558;P00558-2	Phosphoglycerate kinase 1	PGK1
1.0577	1.0412	1.004	1.077	0.85938	1.3976	0.82475	1.0732	0.77404	0.79806	0.90026	0.82235	0.87598	0.89668				14	14	14	71.1	71.1	71.1	21.635	0	195680000000	101440000000	94239000000	12	11	12	12	13	11	12	11	9	8	9	9	10	12	P00568;Q9Y6K8;Q9Y6K8-2;Q9Y6K8-3	P00568	Adenylate kinase isoenzyme 1	AK1
1.0322	0.89161	0.88788	0.88845	0.68958	1.0982	0.50286	NaN	NaN	NaN	0.76018	0.45389	NaN	0.41451				10	10	10	30.3	30.3	30.3	40.764	0	14117000000	7507700000	6609600000	3	4	5	3	5	5	5	1	2	2	2	3	2	2	P00813	P00813	Adenosine deaminase	ADA
1.0354	1.0392	1.1058	0.90296	0.72217	1.5717	0.63692	0.99197	0.65052	0.80432	0.84297	0.75693	0.77918	0.72351				2	2	2	7.1	7.1	7.1	24.817	0	79043000000	42686000000	36358000000	2	1	2	1	1	1	1	1	1	1	1	1	1	1	P00846	P00846	ATP synthase subunit a	MT-ATP6
1.0042	0.9172	0.92724	0.97289	0.7177	1.3255	0.5701	1.022	0.73055	0.80998	0.82394	0.85419	0.77208	0.74922				28	28	28	52.2	52.2	52.2	46.53	0	2046200000000	1084400000000	961750000000	24	24	24	24	24	23	22	18	20	18	19	20	18	18	P00966	P00966	Argininosuccinate synthase	ASS1
NaN	NaN	NaN	NaN	NaN	NaN	NaN	NaN	NaN	NaN	NaN	NaN	NaN	NaN				2	2	2	7.2	7.2	7.2	46.028	0.0096171	461210000	275600000	185610000	0	0	1	0	0	0	0	1	2	0	0	0	0	0	P00973;P00973-2;P00973-4;P00973-3	P00973;P00973-2;P00973-4;P00973-3	2-5-oligoadenylate synthase 1	OAS1
0.88211	NaN	0.71208	NaN	0.77193	NaN	0.72688	1.199	0.58734	0.72226	0.68574	0.74411	0.77546	0.76416				5	5	5	35.7	35.7	35.7	23.171	0	12829000000	7600600000	5228000000	3	1	2	3	4	2	2	4	4	3	5	4	4	3	P01033	P01033	Metalloproteinase inhibitor 1	TIMP1
0.69102	NaN	NaN	0.88848	NaN	NaN	NaN	NaN	0.78133	0.87718	0.88365	0.99395	NaN	NaN				4	4	4	30.8	30.8	30.8	15.799	0	8408900000	5013900000	3395100000	3	2	2	3	3	3	2	3	3	2	3	3	2	3	P01034	P01034	Cystatin-C	CST3
1.0127	0.97424	0.88255	0.91369	0.70264	1.3718	0.53783	1.1031	0.67087	0.84358	0.81116	0.94746	0.85833	0.74253				7	7	2	47.1	47.1	6.9	21.229	0	44117000000	24268000000	19850000000	6	5	6	5	6	5	5	4	4	3	4	3	4	3	P01111	P01111	GTPase NRas	NRAS
NaN	NaN	NaN	NaN	NaN	NaN	NaN	NaN	NaN	NaN	NaN	NaN	NaN	NaN				7	3	2	56.1	22.2	14.3	21.298	0	1181800000	511800000	670010000	4	4	5	6	5	4	4	5	4	3	4	3	4	3	P01112;P01112-2	P01112;P01112-2	GTPase HRas;GTPase HRas, N-terminally processed	HRAS
NaN	NaN	NaN	0.98259	NaN	NaN	NaN	NaN	NaN	NaN	NaN	NaN	NaN	NaN				6	2	2	48.4	14.4	14.4	21.424	0	1165900000	910230000	255620000	4	3	5	5	5	4	4	5	4	4	4	5	3	3	P01116-2;P01116	P01116-2;P01116	GTPase KRas;GTPase KRas, N-terminally processed	KRAS
0.95577	0.91833	0.94129	0.80166	0.82391	1.2385	0.69726	1.1075	0.8715	1.1097	1.0856	1.0152	NaN	0.59068				14	14	13	20.7	20.7	19.9	95.375	0	13237000000	7470100000	5767200000	5	9	8	7	8	7	8	7	5	7	7	2	4	5	P01130;P01130-3;P01130-6;P01130-4;P01130-2;P01130-5	P01130;P01130-3;P01130-6;P01130-4;P01130-2;P01130-5	Low-density lipoprotein receptor	LDLR
1.1458	0.918	0.83005	0.64216	0.22856	0.54985	NaN	1.0768	0.65311	0.71262	0.60023	0.47635	0.33534	0.22158				2	2	2	25.5	25.5	25.5	11.981	0	395010000000	242130000000	152880000000	2	2	2	2	2	2	2	2	2	2	2	2	2	2	P01308;F8WCM5	P01308;F8WCM5	Insulin;Insulin B chain;Insulin A chain;Insulin, isoform 2	INS;INS-IGF2
1.0326	0.93952	1.0679	0.92379	0.81025	1.4115	0.78041	0.95513	0.74422	0.90054	0.90141	0.84246	0.79919	0.89271				13	9	2	42.7	28.8	6.6	40.908	0	36607000000	18038000000	18569000000	8	9	8	9	10	8	9	11	11	9	8	10	9	10	P01891;Q09160	P01891	HLA class I histocompatibility antigen, A-68 alpha chain	HLA-A
NaN	NaN	NaN	NaN	NaN	NaN	NaN	NaN	NaN	NaN	NaN	NaN	NaN	NaN				2	2	1	1.5	1.5	0.9	160.61	0.00040445	137490000	88811000	48676000	1	1	1	1	1	1	1	0	0	0	0	0	0	0	P02462;P02462-2	P02462;P02462-2	Collagen alpha-1(IV) chain;Arresten	COL4A1
0.94062	1.0061	0.9777	1.0275	0.92682	1.4689	0.67357	NaN	NaN	NaN	NaN	NaN	NaN	NaN				6	6	6	35.4	35.4	35.4	20.159	0	6450000000	3026100000	3423900000	4	4	4	6	4	5	4	0	0	1	1	0	0	1	P02511	P02511	Alpha-crystallin B chain	CRYAB
0.97704	0.95608	0.96778	0.97845	0.74929	1.3128	0.6528	1.0206	0.70087	0.83956	0.81177	0.83713	0.81677	0.7581				76	76	74	77.3	77.3	76.2	74.139	0	4731000000000	2513700000000	2217300000000	63	63	61	66	66	66	65	48	47	50	47	49	51	50	P02545;P02545-3;P02545-6;P02545-2;P02545-5;P02545-4	P02545;P02545-3;P02545-6;P02545-2;P02545-5;P02545-4	Prelamin-A/C;Lamin-A/C	LMNA
NaN	NaN	NaN	NaN	NaN	NaN	NaN	NaN	NaN	NaN	NaN	NaN	NaN	NaN				1	1	1	16.2	16.2	16.2	10.852	0	743650000	568460000	175190000	0	1	1	1	1	1	0	1	1	0	1	0	0	0	P02656	P02656	Apolipoprotein C-III	APOC3
NaN	NaN	NaN	NaN	NaN	NaN	NaN	NaN	NaN	NaN	NaN	NaN	NaN	NaN				1	1	1	7.5	7.5	7.5	38.177	0.00020296	12576000	12576000	0	0	0	0	0	0	0	0	0	1	0	0	0	0	0	P02750	P02750	Leucine-rich alpha-2-glycoprotein	LRG1
0.99752	0.90789	0.89577	0.82908	0.70059	1.2421	0.54096	1.0209	0.63368	0.79018	0.76757	0.73529	0.70452	0.66489				38	38	37	50.5	50.5	50.5	84.87	0	1354600000000	737920000000	616650000000	32	32	34	29	31	31	29	29	31	29	31	33	31	30	P02786	P02786	Transferrin receptor protein 1;Transferrin receptor protein 1, serum form	TFRC
1.0341	1.0094	1.0292	1.0111	0.7833	1.4075	0.68847	0.99686	0.81278	0.92754	0.89744	0.90076	0.7849	0.84606				38	38	37	53.4	53.4	52.4	77.063	0	677780000000	349640000000	328140000000	29	29	31	29	31	27	32	31	29	29	28	29	29	29	P02787	P02787	Serotransferrin	TF
NaN	NaN	NaN	1.0075	0.6898	NaN	NaN	NaN	NaN	NaN	0.95957	0.86835	NaN	NaN				3	3	3	11	11	11	51.676	0	2096900000	1139900000	957050000	1	1	0	2	2	2	1	2	2	0	3	2	1	3	P02790	P02790	Hemopexin	HPX
NaN	NaN	0.92961	NaN	NaN	NaN	NaN	0.89639	0.6914	NaN	0.92428	0.98979	1.052	0.9213				5	5	5	34.4	34.4	34.4	21.225	0	4159400000	2098800000	2060500000	1	1	1	0	1	1	1	5	2	2	3	4	3	2	P02794	P02794	Ferritin heavy chain	FTH1
0.86249	0.94082	NaN	0.98067	0.87968	1.714	0.86344	1.0262	0.89835	1.1353	0.54961	0.73902	1.1217	1.2689			+	2	2	2	52.5	52.5	52.5	6.0422	0	30974000000	15981000000	14993000000	1	1	1	1	1	2	2	1	1	1	1	1	1	1	P02795;Q8N339;P80297;P13640;P13640-2;P04732;CON__P67983	P02795;Q8N339;P80297;P13640;P13640-2;P04732;CON__P67983	Metallothionein-2;Metallothionein-1M;Metallothionein-1X;Metallothionein-1G;Metallothionein-1E	MT2A;MT1M;MT1X;MT1G;MT1E
NaN	1.1353	1.2681	1.1875	0.95298	1.7653	1.0272	1.0543	0.91306	1.0542	1.0332	1.0899	1.5378	1.1776				1	1	1	2.8	2.8	2.8	67.026	0	8668600000	4135100000	4533500000	1	1	1	1	1	1	1	1	1	1	1	1	1	1	P03915	P03915	NADH-ubiquinone oxidoreductase chain 5	MT-ND5
1.1059	1.0051	0.81811	0.85887	0.71715	1.1122	0.369	1.1623	0.57072	0.74796	0.73819	0.72151	0.69426	0.79749				2	2	2	35.3	35.3	35.3	7.9916	0	49027000000	27294000000	21732000000	2	2	2	2	2	2	2	2	2	2	2	2	2	2	P03928	P03928	ATP synthase protein 8	MT-ATP8
1.363	1.134	0.98858	0.91292	0.71922	1.4344	0.55258	NaN	NaN	0.86819	NaN	NaN	NaN	NaN				6	5	5	18.8	15.7	15.7	54.305	0	10226000000	6212200000	4013600000	5	5	3	4	5	4	5	3	3	3	2	4	2	3	P04004	P04004	Vitronectin;Vitronectin V65 subunit;Vitronectin V10 subunit;Somatomedin-B	VTN
0.92614	0.92717	0.95621	0.99022	0.76252	1.3554	0.71804	1.0299	0.82921	0.87	0.83385	0.90268	0.93188	0.76706				22	22	22	49.7	49.7	49.7	59.755	0	94592000000	50779000000	43813000000	15	14	15	14	15	15	17	15	14	15	15	13	13	14	P04040	P04040	Catalase	CAT
1.0132	0.92645	0.97499	0.88012	0.83807	1.1419	0.5014	0.98881	0.58127	0.73958	0.78739	0.72411	0.66931	0.6565				12	12	12	27.4	27.4	27.4	59.716	0	17885000000	8735800000	9149400000	9	6	7	8	8	6	7	5	2	4	6	4	4	3	P04062;P04062-4;P04062-2;P04062-5;P04062-3	P04062;P04062-4;P04062-2;P04062-5;P04062-3	Glucosylceramidase	GBA
1.0094	0.92444	0.95106	0.96302	0.77328	1.2913	0.6839	0.95527	0.80541	0.92912	0.87212	0.94646	0.88009	0.85799				30	30	26	85.2	85.2	71.7	39.42	0	3648100000000	1906500000000	1741600000000	28	27	28	28	27	28	27	26	26	23	26	25	25	23	P04075;P04075-2	P04075;P04075-2	Fructose-bisphosphate aldolase A	ALDOA
0.99995	0.82784	0.86625	0.86084	0.65262	1.2995	0.73599	1.024	0.76953	0.8799	0.89866	0.87398	1.0913	0.83272				7	7	7	83.7	83.7	83.7	11.139	0	499020000000	274980000000	224040000000	6	7	7	7	7	7	7	6	6	6	6	6	6	6	P04080	P04080	Cystatin-B	CSTB
1.0029	0.95428	1.0016	0.92732	0.73702	1.3224	0.53375	1.0465	0.73513	0.83117	0.81597	0.80492	0.74605	0.79485				24	24	24	64.7	64.7	64.7	38.714	0	711260000000	376880000000	334370000000	20	19	18	19	19	22	18	17	16	18	18	18	17	17	P04083	P04083	Annexin A1	ANXA1
0.87155	0.87482	0.90693	0.82902	0.6626	1.3306	0.50622	1.0599	0.70129	0.7176	0.71246	0.76369	0.72096	0.63154				9	9	9	15.2	15.2	15.2	85.658	0	6736900000	3794300000	2942600000	3	5	4	4	4	3	3	5	3	4	5	3	3	2	P04150;P04150-2;P04150-6;P04150-3;P04150-9;P04150-8;P04150-10;P04150-13;P04150-12;P04150-11;P04150-7;P04150-5;P04150-16;P04150-15;P04150-14	P04150;P04150-2;P04150-6;P04150-3;P04150-9;P04150-8;P04150-10;P04150-13;P04150-12;P04150-11;P04150-7;P04150-5	Glucocorticoid receptor	NR3C1
NaN	NaN	NaN	NaN	NaN	NaN	NaN	NaN	NaN	NaN	NaN	NaN	NaN	NaN				1	1	1	4.9	4.9	4.9	26.885	0	1852200000	873790000	978450000	1	1	1	1	1	1	1	1	1	1	1	1	1	1	P04156-2;P04156	P04156-2;P04156	Major prion protein	PRNP
1.1541	1.2307	1.1116	1.0579	0.9275	1.6881	0.52587	1.0317	0.92539	0.60652	0.90125	0.96156	0.62208	0.60881				6	6	6	30.2	30.2	30.2	24.722	0	21869000000	11257000000	10612000000	5	5	5	5	5	4	3	5	4	4	4	3	4	4	P04179;P04179-4;P04179-2;P04179-3	P04179;P04179-4;P04179-2;P04179-3	Superoxide dismutase [Mn], mitochondrial	SOD2
0.92606	0.79942	0.80543	0.73747	0.59806	1.2242	0.42825	1.0352	0.62613	0.78405	0.73037	0.69441	0.88346	0.62056				16	16	16	43.3	43.3	43.3	48.534	0	54936000000	30119000000	24817000000	6	7	8	8	8	6	7	8	5	8	5	6	6	8	P04181;P04181-2	P04181;P04181-2	Ornithine aminotransferase, mitochondrial;Ornithine aminotransferase, hepatic form;Ornithine aminotransferase, renal form	OAT
1.018	0.84524	0.87389	0.94098	0.63778	1.0279	0.52312	1.0555	0.8415	0.96511	0.91314	1.0437	0.68148	0.63043				16	16	16	56.4	56.4	56.4	25.468	0	137580000000	72401000000	65177000000	12	14	14	11	13	9	12	9	10	10	11	10	11	12	P04183	P04183	Thymidine kinase, cytosolic	TK1
NaN	NaN	NaN	NaN	NaN	NaN	NaN	NaN	NaN	NaN	NaN	NaN	NaN	NaN				9	1	0	29.5	3	0	40.86	0.0055545	1927100000	1070500000	856560000	5	5	5	6	5	5	6	7	7	5	8	5	6	6	P04222	P04222	HLA class I histocompatibility antigen, Cw-3 alpha chain	HLA-C
0.97537	1.7696	1.1028	1.1014	0.71775	1.4855	0.69948	0.99937	0.79515	0.72413	1.9705	1.2776	1.4456	0.62928			+	32	29	18	55.4	54.3	39	66.038	0	135170000000	62780000000	72390000000	20	20	21	21	19	22	22	19	19	18	19	24	22	17	P04264;CON__P04264	P04264;CON__P04264	Keratin, type II cytoskeletal 1	KRT1
NaN	NaN	NaN	NaN	NaN	NaN	NaN	NaN	NaN	NaN	NaN	0.98293	NaN	0.7471				25	2	1	55.9	4.5	4.5	49.585	0	3231200000	1906400000	1324900000	21	21	21	22	21	20	22	19	19	19	20	20	19	20	P04350	P04350	Tubulin beta-4A chain	TUBB4A
0.98379	0.81197	0.85215	0.91395	0.67986	1.1862	0.7081	0.9973	0.83319	1.0151	0.94377	1.1201	0.97128	0.9501				25	25	3	81.8	81.8	14	36.053	0	12834000000000	7048900000000	5785100000000	23	23	22	23	23	24	24	21	22	21	21	21	21	21	P04406	P04406	Glyceraldehyde-3-phosphate dehydrogenase	GAPDH
1.1151	1.089	1.0773	NaN	0.84696	1.4312	0.57985	1.0928	1.1818	1.0224	1.3021	1.0205	1.0992	0.96037				24	2	2	81.9	4.4	4.4	31.548	0	18518000000	9007400000	9510300000	23	23	22	23	23	24	24	21	22	21	21	21	21	21	P04406-2;O14556	P04406-2	Glyceraldehyde-3-phosphate dehydrogenase	GAPDH
NaN	NaN	NaN	NaN	NaN	NaN	NaN	NaN	NaN	NaN	NaN	NaN	NaN	NaN				5	4	1	6	5	1.7	137.91	0	1078600000	521080000	557500000	1	2	2	1	1	2	4	3	3	3	1	1	2	3	P04626;P04626-5;P04626-4;P04626-3;P04626-2	P04626;P04626-5;P04626-4;P04626-3;P04626-2	Receptor tyrosine-protein kinase erbB-2	ERBB2
NaN	NaN	NaN	NaN	NaN	NaN	NaN	NaN	NaN	NaN	NaN	NaN	NaN	NaN				4	1	1	7.1	1.9	1.9	97.381	0.0046607	0	0	0	1	1	1	0	1	1	3	1	2	2	0	0	2	2	P04626-6	P04626-6	Receptor tyrosine-protein kinase erbB-2	ERBB2
0.90108	0.96307	1.0365	1.059	0.83396	1.4045	1.0219	1.2175	0.78683	0.81016	0.8468	0.88307	1.0071	0.80375				8	8	8	28.7	28.7	28.7	28.315	0	54529000000	29710000000	24819000000	5	6	5	6	6	6	6	5	6	5	5	5	5	6	P04632;Q96L46	P04632	Calpain small subunit 1	CAPNS1
1.0207	0.86868	0.93056	0.88659	0.69969	1.282	0.55743	0.99326	0.70431	0.82242	0.80029	0.80894	0.72198	0.73784				15	15	15	68.8	68.8	68.8	22.782	0	1960900000000	1057600000000	903290000000	12	12	12	12	12	13	12	11	11	11	11	11	11	11	P04792	P04792	Heat shock protein beta-1	HSPB1
1.0298	0.87029	0.83308	0.88578	0.65394	1.1332	0.53246	0.98566	0.65987	0.77955	0.75846	0.94777	0.73974	0.75185				11	11	11	49.5	49.5	49.5	35.716	0	60307000000	32498000000	27809000000	7	6	6	5	6	5	7	8	9	7	8	8	7	6	P04818;P04818-2;P04818-3	P04818;P04818-2;P04818-3	Thymidylate synthase	TYMS
0.99045	0.97459	1.0155	0.79135	0.72915	1.3187	0.69455	0.97365	0.76979	0.90323	0.96087	0.9081	0.95781	0.87005				40	40	40	63.9	63.9	63.9	68.569	0	510430000000	264830000000	245600000000	30	31	31	33	33	29	31	27	26	24	23	27	29	26	P04843	P04843	Dolichyl-diphosphooligosaccharide--protein glycosyltransferase subunit 1	RPN1
1.0047	0.98674	1.0573	0.76304	0.80395	1.4362	0.67269	0.99888	0.83079	1.0661	1.0661	0.94019	0.80512	0.96336				16	16	16	31.4	31.4	31.4	69.283	0	114710000000	64337000000	50373000000	13	11	12	14	13	11	13	9	8	10	9	9	9	9	P04844;P04844-2	P04844;P04844-2	Dolichyl-diphosphooligosaccharide--protein glycosyltransferase subunit 2	RPN2
1.0746	0.97825	1.0475	0.85263	0.83271	1.1464	0.54075	0.98543	0.68067	0.84175	0.89762	0.84507	0.7242	0.7683				15	9	9	46.2	30.1	30.1	40.45	0	26137000000	13648000000	12489000000	12	11	12	12	13	13	13	10	10	10	10	11	9	11	P04899;P04899-4;P04899-6;P04899-3;P04899-5;P04899-2	P04899;P04899-4;P04899-6;P04899-3;P04899-5;P04899-2	Guanine nucleotide-binding protein G(i) subunit alpha-2	GNAI2
NaN	NaN	NaN	NaN	0.67285	NaN	0.65051	NaN	NaN	NaN	NaN	NaN	NaN	NaN				7	1	0	59.2	22.3	0	14.091	0	13786000000	11178000000	2607400000	7	7	6	6	6	6	6	5	5	5	5	4	4	3	P0C0S8;Q9BTM1;Q99878;Q93077;Q7L7L0;P04908;Q96KK5;P20671;P16104;Q9BTM1-2;Q96QV6	P0C0S8;Q9BTM1;Q99878;Q93077;Q7L7L0;P04908;Q96KK5;P20671;P16104;Q9BTM1-2;Q96QV6	Histone H2A type 1;Histone H2A.J;Histone H2A type 1-J;Histone H2A type 1-C;Histone H2A type 3;Histone H2A type 1-B/E;Histone H2A type 1-H;Histone H2A type 1-D;Histone H2A.x;Histone H2A type 1-A	HIST1H2AG;H2AFJ;HIST1H2AJ;HIST1H2AC;HIST3H2A;HIST1H2AB;HIST1H2AH;HIST1H2AD;H2AFX;HIST1H2AA
0.97922	0.84337	0.89337	0.84356	0.71632	1.0376	0.63952	1.0396	0.83606	1.0441	1.1141	0.94111	0.93959	0.95487				18	18	18	23.7	23.7	23.7	137.01	0	24036000000	12674000000	11362000000	6	9	8	11	8	5	8	8	7	6	6	5	5	6	P04920;P04920-2;P04920-3;P48751;P48751-2;P48751-3	P04920;P04920-2;P04920-3	Anion exchange protein 2	SLC4A2
1.0406	0.9421	0.98025	0.85781	0.74054	1.3007	0.58389	1.0324	0.72701	0.83386	0.83679	0.7843	0.74002	0.76049				48	48	32	49.3	49.3	33.7	112.89	0	1179700000000	628050000000	551670000000	42	42	40	42	41	43	43	36	39	38	38	36	39	38	P05023;P05023-4;P05023-3;P05023-2	P05023;P05023-4;P05023-3;P05023-2	Sodium/potassium-transporting ATPase subunit alpha-1	ATP1A1
0.96533	0.89278	0.94873	0.80716	0.70023	1.3608	0.57568	0.95414	0.7048	0.83763	0.8591	0.80737	0.78607	0.73425				10	10	10	35.3	35.3	35.3	35.061	0	142640000000	77321000000	65316000000	8	7	8	5	7	7	8	7	7	7	6	8	6	8	P05026;P05026-2	P05026;P05026-2	Sodium/potassium-transporting ATPase subunit beta-1	ATP1B1
NaN	NaN	NaN	NaN	NaN	NaN	NaN	NaN	NaN	NaN	NaN	NaN	NaN	NaN				5	5	5	10.3	10.3	10.3	86.942	0	1348900000	652570000	696360000	0	1	2	2	1	1	1	2	2	2	3	2	1	1	P05067;P05067-9;P05067-8;P05067-5;P05067-6;P05067-7;P05067-11;P05067-4;P05067-10;P05067-3	P05067;P05067-9;P05067-8;P05067-5;P05067-6;P05067-7;P05067-11;P05067-4;P05067-10;P05067-3	Amyloid beta A4 protein;N-APP;Soluble APP-alpha;Soluble APP-beta;C99;Beta-amyloid protein 42;Beta-amyloid protein 40;C83;P3(42);P3(40);C80;Gamma-secretase C-terminal fragment 59;Gamma-secretase C-terminal fragment 57;Gamma-secretase C-terminal fragment 50;C31	APP
1.1751	1.1051	1.0485	0.6574	0.67464	1.0614	0.50622	1.2707	0.76803	1.7413	1.0313	0.75453	1.0523	1.167				4	4	4	42	42	42	10.659	0	24291000000	11551000000	12740000000	2	2	2	2	2	2	2	3	3	4	4	3	2	3	P05114	P05114	Non-histone chromosomal protein HMG-14	HMGN1
0.98545	0.92818	0.91463	0.82719	0.67829	1.2262	0.49511	1.042	0.66168	0.85557	0.83908	0.84117	0.75008	0.74189				27	27	10	56	56	25.5	32.852	0	3513800000000	1895900000000	1617900000000	23	21	22	23	22	21	21	21	19	19	20	20	21	19	P05141;Q9H0C2	P05141	ADP/ATP translocase 2;ADP/ATP translocase 2, N-terminally processed	SLC25A5
1.2415	1.0821	1.081	1.1321	0.86688	1.4179	0.5466	1.0956	0.83532	0.85587	0.9583	1.0179	0.80996	0.8221				4	4	4	21.2	21.2	21.2	17.887	0	14264000000	7770800000	6493300000	2	3	3	3	3	3	3	3	2	3	3	3	4	3	P05161	P05161	Ubiquitin-like protein ISG15	ISG15
NaN	NaN	NaN	NaN	NaN	NaN	NaN	NaN	NaN	0.74891	1.0287	0.90251	0.91264	0.71061				13	13	13	24.6	24.6	24.6	80.058	0	5660500000	2886600000	2774000000	1	4	4	3	4	2	2	4	3	5	3	3	2	4	P05165;P05165-3;P05165-2	P05165;P05165-3;P05165-2	Propionyl-CoA carboxylase alpha chain, mitochondrial	PCCA
NaN	NaN	0.78848	0.90118	NaN	1.333	NaN	NaN	NaN	NaN	NaN	NaN	NaN	0.68419				13	13	13	35.6	35.6	35.6	58.215	0	1977400000	1201600000	775790000	2	2	3	4	3	3	2	2	4	3	3	2	1	6	P05166;P05166-2	P05166;P05166-2	Propionyl-CoA carboxylase beta chain, mitochondrial	PCCB
0.81287	1.0164	1.122	0.92606	0.8816	1.6169	0.52652	1.1342	0.71947	0.95913	0.85539	0.81306	0.98901	0.88054				16	16	16	46.5	46.5	46.5	57.953	0	33448000000	17770000000	15678000000	6	7	8	7	7	7	6	11	9	11	9	9	9	10	P05187;P10696;P09923	P05187;P10696	Alkaline phosphatase, placental type;Alkaline phosphatase, placental-like	ALPP;ALPPL2
1.0114	0.93548	0.98773	0.96216	0.78188	1.2603	0.51567	1.0064	0.70573	0.78146	0.78224	0.77062	0.72163	0.69566				26	26	26	76.2	76.2	76.2	36.112	0	447030000000	240100000000	206930000000	19	20	18	20	21	19	21	18	15	19	18	18	17	18	P05198	P05198	Eukaryotic translation initiation factor 2 subunit 1	EIF2S1
0.98694	0.97109	0.93434	0.8742	0.8486	1.4052	0.62237	0.97059	0.80781	0.98496	1.1453	0.89883	1.1973	0.71946				13	13	13	33.8	33.8	33.8	57.825	0	35350000000	18309000000	17041000000	6	4	6	6	6	7	6	8	8	7	8	5	7	9	P05362	P05362	Intercellular adhesion molecule 1	ICAM1
0.97548	0.90006	0.92854	1.0061	0.67498	1.3356	0.63248	1.0542	0.80816	0.8507	0.73772	NaN	NaN	NaN				4	3	3	89.5	74.6	74.6	11.514	0	289170000000	180600000000	108570000000	2	2	2	2	2	2	2	4	4	3	3	3	2	2	P05386	P05386	60S acidic ribosomal protein P1	RPLP1
1.0035	0.9093	0.90134	0.88817	0.69166	1.2553	0.53496	0.97106	0.66175	0.77774	0.76906	0.81247	0.74871	0.72965				8	8	7	93	93	78.3	11.665	0	2334700000000	1233700000000	1101100000000	7	7	7	7	7	7	7	7	6	7	7	7	6	7	P05387;P05386-2	P05387	60S acidic ribosomal protein P2	RPLP2
0.96996	0.9564	0.96378	0.94142	0.70859	1.3256	0.56971	1.044	0.71456	0.82392	0.83136	0.84824	0.77808	0.75867				20	20	20	69.1	69.1	69.1	34.273	0	1521100000000	850790000000	670330000000	15	16	15	15	14	15	16	15	15	15	16	15	15	15	P05388;P05388-2;Q8NHW5	P05388;P05388-2;Q8NHW5	60S acidic ribosomal protein P0;60S acidic ribosomal protein P0-like	RPLP0;RPLP0P6
NaN	NaN	NaN	NaN	NaN	NaN	NaN	NaN	NaN	NaN	NaN	NaN	NaN	NaN				3	3	3	13	13	13	35.675	0	250100000	82573000	167530000	1	1	1	0	0	0	0	1	0	0	1	1	1	1	P05412	P05412	Transcription factor AP-1	JUN
0.9974	0.89	NaN	1.0063	NaN	1.149	0.51548	NaN	NaN	NaN	NaN	NaN	NaN	NaN				6	6	6	18.6	18.6	18.6	44.395	0	2339700000	1364800000	974960000	4	2	3	2	2	2	2	2	0	1	2	1	0	2	P05423	P05423	DNA-directed RNA polymerase III subunit RPC4	POLR3D
1.0325	0.90517	0.97221	1.0401	0.74313	1.4521	0.75106	0.98051	0.80289	0.82464	0.86678	0.97987	0.8601	0.80336				18	18	18	42.6	42.6	42.6	46.836	0	273360000000	146720000000	126640000000	12	14	10	13	13	12	13	12	11	10	11	12	11	11	P05455	P05455	Lupus La protein	SSB
NaN	NaN	NaN	NaN	NaN	NaN	NaN	2.9792	0.51572	NaN	NaN	2.5941	NaN	NaN				7	7	6	21.3	21.3	19	48.062	0	3456000000	1944600000	1511400000	3	2	2	2	1	2	2	4	3	2	1	3	3	4	P05549;P05549-5;P05549-6;P05549-2;Q92754;Q6VUC0;Q92754-2	P05549;P05549-5;P05549-6;P05549-2	Transcription factor AP-2-alpha	TFAP2A
1.0252	0.95921	0.91432	0.7644	0.7899	1.2509	0.62016	1.0221	0.67575	0.8784	0.84377	0.81528	0.81001	0.79478				27	27	27	39.7	39.7	39.7	88.414	0	303340000000	166090000000	137250000000	22	23	20	21	23	21	20	17	19	18	17	16	17	17	P05556;P05556-5;P05556-2;P05556-4;P05556-3	P05556;P05556-5;P05556-2;P05556-4;P05556-3	Integrin beta-1	ITGB1
0.99345	0.98462	1.028	0.97838	0.74823	1.3819	0.60536	1.0184	0.6843	0.8203	0.82645	0.80807	0.9259	0.70267				54	54	36	84.2	84.2	69.3	48.057	0	10522000000000	5528800000000	4993400000000	49	45	45	47	46	48	47	42	42	41	40	41	39	40	P05783;CON__H-INV:HIT000015463;CON__Q92764;Q15323;Q14525;CON__Q14525;CON__Q9UE12;CON__Q15323;CON__A2A5Y0;CON__REFSEQ:XP_986630	P05783	Keratin, type I cytoskeletal 18	KRT18
NaN	NaN	0.78122	NaN	NaN	NaN	NaN	1.0253	0.65215	0.77754	0.77061	0.73636	0.80595	0.76958				1	1	1	6.2	6.2	6.2	21.932	0	19454000000	10764000000	8689600000	0	0	1	0	1	1	0	1	1	1	1	1	1	1	P08590;P05976;P05976-2	P08590;P05976;P05976-2	Myosin light chain 3;Myosin light chain 1/3, skeletal muscle isoform	MYL3;MYL1
1.0143	0.9726	1.0578	1.0259	0.7725	1.4922	0.69403	1.0404	0.65845	0.83281	0.80081	0.86449	0.79241	0.7554				11	11	11	32.4	32.4	32.4	40.786	0	44029000000	24091000000	19938000000	5	5	7	6	6	7	6	4	6	6	7	8	6	6	P06132	P06132	Uroporphyrinogen decarboxylase	UROD
0.92929	0.96115	1.1095	NaN	0.88297	1.3463	0.64306	1.0888	NaN	1.0595	0.97803	0.93035	0.7599	0.83979				13	9	4	26.4	19.6	5.6	60.761	0	4660800000	2276700000	2384100000	4	5	5	3	5	7	4	8	2	5	6	6	5	7	P06241	P06241	Tyrosine-protein kinase Fyn	FYN
NaN	NaN	NaN	NaN	NaN	NaN	NaN	NaN	NaN	NaN	NaN	NaN	NaN	NaN				10	1	1	24	3	3	60.14	0	204940000	131340000	73595000	4	5	5	3	5	7	4	5	2	4	3	4	4	5	P06241-2	P06241-2	Tyrosine-protein kinase Fyn	FYN
0.96015	1.1616	0.84897	0.89636	0.60869	1.1064	0.68384	NaN	0.51461	0.68067	NaN	NaN	NaN	NaN				6	6	6	18.6	18.6	18.6	48.766	0	3411500000	1794100000	1617400000	2	3	4	3	3	2	3	3	3	3	3	2	3	1	P06280	P06280	Alpha-galactosidase A	GLA
1.1066	0.92664	1.0102	0.8821	0.69107	1.2446	0.53989	0.96773	0.6067	0.71158	0.73285	0.68671	0.70389	0.72286			+	10	10	10	19.2	19.2	19.2	80.64	0	17513000000	9744500000	7768900000	7	7	8	6	6	6	7	7	5	5	5	7	4	5	P06396-2;P06396;P06396-4;P06396-3;CON__Q3SX14;REV__Q6TDU7-4;REV__Q6TDU7-2;REV__Q6TDU7-3;REV__Q6TDU7	P06396-2;P06396;P06396-4;P06396-3;CON__Q3SX14	Gelsolin	GSN
NaN	NaN	NaN	NaN	NaN	NaN	NaN	NaN	NaN	NaN	1.2655	NaN	NaN	NaN				7	7	7	10.5	10.5	10.5	106.16	0	1374300000	622230000	752030000	1	2	3	2	1	1	2	1	2	2	2	2	1	1	P06400	P06400	Retinoblastoma-associated protein	RB1
1.1988	0.69994	1.0732	1.2387	NaN	1.1013	0.47369	1.3442	1.1428	1.5389	1.3264	1.439	0.76702	1.429				4	4	4	37.8	37.8	37.8	12.203	0	88025000000	36018000000	52007000000	2	2	3	2	2	3	3	2	3	4	3	3	3	3	P06454;P06454-2	P06454;P06454-2	Prothymosin alpha;Prothymosin alpha, N-terminally processed;Thymosin alpha-1	PTMA
1.0372	0.9279	0.93836	0.89904	0.64921	1.2836	0.56066	1.0098	0.70312	0.81393	0.78229	0.81592	0.69126	0.67618				19	19	17	67.3	67.3	60.9	34.095	0	468410000000	252000000000	216410000000	12	18	18	17	18	14	17	15	16	16	16	16	15	14	P06493;P06493-2;Q00526;Q00537;Q07002;Q96Q40;Q07002-3;Q96Q40-4;Q96Q40-3;Q96Q40-5;Q07002-2;Q00537-2	P06493;P06493-2	Cyclin-dependent kinase 1	CDK1
1.0302	0.8853	0.90166	0.88015	0.6523	1.223	0.51079	1.037	0.63193	0.81701	0.78203	0.76532	0.72779	0.74177				27	27	27	59.4	59.4	59.4	56.559	0	3293400000000	1815100000000	1478300000000	22	24	23	23	22	22	23	20	20	20	20	20	20	20	P06576	P06576	ATP synthase subunit beta, mitochondrial	ATP5B
0.97081	0.94683	0.94729	0.92764	0.76842	1.2527	0.50952	1.0325	0.64269	0.75035	0.74054	0.72017	0.69819	0.66278				6	6	6	45.6	45.6	45.6	10.18	0	939980000000	513320000000	426650000000	5	5	5	5	6	5	5	4	4	4	4	4	4	4	P06703	P06703	Protein S100-A6	S100A6
1.0174	1.007	1.0058	0.97854	0.79089	1.3565	0.6194	0.96822	0.82171	0.88412	0.94233	0.84603	0.8594	0.7213				7	7	1	39.2	39.2	9.2	25.097	0	165150000000	86233000000	78921000000	6	7	7	6	6	7	7	6	7	7	6	7	6	6	P06730;P06730-2	P06730;P06730-2	Eukaryotic translation initiation factor 4E	EIF4E
NaN	NaN	NaN	NaN	NaN	NaN	NaN	NaN	NaN	NaN	NaN	NaN	NaN	NaN	+			7	1	1	30.4	3	3	27.259	1	3136300000	3136300000	0	6	6	6	6	6	6	6	5	6	6	5	7	7	6	P06730-3	P06730-3	Eukaryotic translation initiation factor 4E	EIF4E
0.97833	0.90594	0.94552	0.93691	0.73185	1.3284	0.62749	0.98792	0.75555	0.89559	0.83291	0.89317	0.83714	0.7962				32	32	8	82	82	17.1	47.168	0	10995000000000	5806700000000	5188600000000	29	28	29	28	28	29	26	26	26	26	25	27	26	26	P06733	P06733	Alpha-enolase	ENO1
NaN	NaN	NaN	NaN	NaN	NaN	NaN	NaN	NaN	NaN	NaN	NaN	NaN	NaN				24	1	1	85.6	2.9	2.9	36.928	0.0013462	1175100000	679040000	496070000	21	20	21	20	20	21	18	18	18	18	17	20	18	18	P06733-2	P06733-2	Alpha-enolase	ENO1
0.92855	0.82107	1.3322	0.8037	0.62366	1.2505	0.56737	0.79571	0.67849	0.7003	0.67636	0.61199	0.73209	0.58462				20	18	18	27.9	25.5	25.5	97.147	0	17047000000	13038000000	4008900000	8	10	10	10	10	10	10	8	10	6	10	11	9	10	P06737;P06737-2	P06737;P06737-2	Glycogen phosphorylase, liver form	PYGL
1.0155	0.93123	0.92053	0.93971	0.7383	1.2673	0.56508	1.0023	0.72701	0.8083	0.83373	0.88888	0.77376	0.74949				24	24	19	46.1	46.1	36.6	63.146	0	2643800000000	1443200000000	1200600000000	20	22	20	20	21	21	20	22	23	22	22	21	22	21	P06744;P06744-2	P06744;P06744-2	Glucose-6-phosphate isomerase	GPI
1.0127	0.94536	0.97249	0.954	0.75127	1.3287	0.56892	1.0418	0.7457	0.83777	0.83572	0.87324	0.86092	0.76229				16	16	16	59.2	59.2	59.2	32.575	0	5102600000000	2776100000000	2326400000000	14	11	12	12	12	12	13	11	13	12	13	14	13	12	P06748;P06748-2;P06748-3	P06748;P06748-2;P06748-3	Nucleophosmin	NPM1
NaN	NaN	NaN	NaN	NaN	NaN	NaN	NaN	NaN	NaN	NaN	NaN	NaN	NaN				18	1	1	41.1	4.6	4.6	32.95	0.0030143	197320000	88864000	108460000	15	14	11	12	12	14	12	9	9	9	10	10	9	9	P06753	P06753	Tropomyosin alpha-3 chain	TPM3
1.015	0.98787	1.0375	1.01	0.81569	1.3647	0.69424	0.99393	0.772	0.89443	0.88201	0.95473	0.79055	0.74457				33	33	7	79.4	79.4	18.1	29.032	0	1209600000000	628680000000	580920000000	26	27	23	23	24	24	22	19	20	20	20	21	20	20	P06753-2;P06753-3;P06753-6	P06753-2;P06753-3;P06753-6	Tropomyosin alpha-3 chain	TPM3
0.99617	0.93657	0.87994	0.81855	0.66553	1.2132	0.56999	1.1532	0.68999	0.74366	0.84874	0.75777	0.78379	0.70632				22	22	22	26.3	26.3	26.3	116.04	0	35880000000	20381000000	15498000000	15	17	13	11	14	16	17	11	10	10	9	10	11	10	P06756;P06756-3;P06756-2	P06756;P06756-3;P06756-2	Integrin alpha-V;Integrin alpha-V heavy chain;Integrin alpha-V light chain	ITGAV
NaN	NaN	NaN	NaN	0.89889	1.3663	NaN	NaN	0.50379	0.58012	NaN	0.57229	0.54211	NaN				6	6	6	14.3	14.3	14.3	53.162	0	6035800000	3375300000	2660500000	0	1	1	1	2	3	3	1	3	2	1	2	3	2	P06858	P06858	Lipoprotein lipase	LPL
0.6614	0.78767	0.65478	0.9019	0.63911	1.0922	0.48849	0.99459	NaN	0.79572	NaN	NaN	1.2079	0.66583				9	9	9	19.5	19.5	19.5	60.702	0	5604600000	3005300000	2599400000	4	5	5	7	6	5	4	3	2	3	1	1	3	4	P06865;P06865-2	P06865	Beta-hexosaminidase subunit alpha	HEXA
0.98789	0.86534	0.76939	0.72086	0.66334	1.1597	0.50405	0.92551	0.60808	0.83006	0.76562	0.80633	0.79929	0.68006				10	1	0	58.7	7.1	0	13.95	0.00059654	534560000000	291430000000	243130000000	8	9	8	9	9	8	8	7	7	6	7	7	7	7	P33778;Q16778;P23527;P06899;Q6DRA6;Q6DN03	P33778;Q16778;P23527;P06899	Histone H2B type 1-B;Histone H2B type 2-E;Histone H2B type 1-O;Histone H2B type 1-J	HIST1H2BB;HIST2H2BE;HIST1H2BO;HIST1H2BJ
1.0093	0.9247	0.82837	0.70013	0.77094	1.443	0.967	1.0227	0.77271	0.9241	1.1452	0.88057	1.0024	0.77602				21	21	21	40.7	40.7	40.7	52.948	0	97892000000	52257000000	45636000000	11	12	11	10	12	11	11	12	11	10	11	12	8	14	P07099	P07099	Epoxide hydrolase 1	EPHX1
0.99403	0.85811	0.84738	0.89115	0.69486	1.2312	0.73657	0.99286	0.72532	0.84571	0.85217	0.7905	0.85894	0.74339				5	5	3	60.9	60.9	34.5	10.044	0	495590000000	262570000000	233020000000	4	3	4	5	4	4	4	4	4	4	4	4	4	4	P07108;P07108-3;P07108-2;P07108-4;P07108-5	P07108;P07108-3;P07108-2;P07108-4;P07108-5	Acyl-CoA-binding protein	DBI
NaN	NaN	NaN	NaN	NaN	NaN	NaN	NaN	NaN	NaN	NaN	NaN	NaN	NaN	+			3	1	1	27.6	8.9	8.9	13.911	1	417410000	277660000	139750000	2	1	1	2	1	1	1	1	1	1	1	1	1	1	P07108-6	P07108-6	Acyl-CoA-binding protein	DBI
1.0169	0.97909	0.91886	0.96094	0.76809	1.307	0.57772	1.0129	0.76681	0.84043	0.83021	0.86598	0.79118	0.72933				22	20	20	61.1	61.1	61.1	36.638	0	4811400000000	2512400000000	2299100000000	20	20	21	20	19	18	19	16	17	17	15	16	15	15	P07195	P07195	L-lactate dehydrogenase B chain	LDHB
NaN	NaN	NaN	NaN	NaN	NaN	NaN	0.87418	NaN	NaN	NaN	NaN	0.66551	NaN				5	5	5	11.4	11.4	11.4	65.171	0	2016400000	1250300000	766080000	1	2	1	1	2	1	3	2	1	1	2	1	3	3	P07199	P07199	Major centromere autoantigen B	CENPB
NaN	NaN	NaN	NaN	NaN	NaN	NaN	NaN	NaN	NaN	NaN	NaN	NaN	NaN				3	3	3	22.2	22.2	22.2	22.088	0.00058858	303590000	190320000	113270000	1	0	0	1	2	0	1	0	0	0	0	0	0	1	P07203	P07203	Glutathione peroxidase 1	GPX1
1.1186	NaN	0.92192	0.93203	0.80638	1.2339	0.53097	NaN	NaN	NaN	NaN	NaN	NaN	NaN				8	3	3	24.2	10.1	10.1	44.796	0	4047500000	2757600000	1289800000	7	7	6	8	7	7	8	6	6	6	5	7	6	5	P07205	P07205	Phosphoglycerate kinase 2	PGK2
1.0146	0.88813	0.89603	0.91169	0.7145	1.2409	0.5573	1.0192	0.66203	0.79835	0.76765	0.80908	0.71992	0.69018				43	43	43	72.4	72.4	72.4	57.116	0	2859200000000	1555000000000	1304200000000	40	39	38	39	39	37	37	34	33	33	33	33	33	32	P07237	P07237	Protein disulfide-isomerase	P4HB
0.98569	0.90494	0.93195	0.67175	0.66273	1.1297	0.52612	0.92972	0.55454	1.1088	1.2434	NaN	NaN	0.82507				4	4	4	21.1	21.1	21.1	20.863	0	6063300000	3241400000	2821900000	3	2	2	2	2	4	2	2	2	1	2	2	1	2	P07305;P07305-2	P07305;P07305-2	Histone H1.0;Histone H1.0, N-terminally processed	H1F0
NaN	NaN	NaN	NaN	NaN	NaN	NaN	NaN	NaN	NaN	NaN	NaN	NaN	NaN				3	3	3	32.3	32.3	32.3	11.261	0	1311900000	84486000	1227400000	1	1	1	2	0	1	0	2	1	2	1	2	2	1	P07311	P07311	Acylphosphatase-1	ACYP1
0.97419	0.73904	0.72038	0.76973	0.5908	1.1522	0.4705	1.1061	0.57239	0.79717	0.75417	0.77338	0.68615	0.67894				11	11	11	35	35	35	44.552	0	20185000000	11480000000	8704800000	5	5	5	4	5	6	7	7	7	5	5	4	5	5	P07339	P07339	Cathepsin D;Cathepsin D light chain;Cathepsin D heavy chain	CTSD
1.007	0.89797	0.92174	0.84416	0.71881	1.3422	0.51428	1.0058	0.70805	0.79286	0.82134	0.78728	0.74127	0.72861				32	32	32	67.8	67.8	67.8	38.604	0	3974200000000	2146200000000	1828000000000	29	31	31	29	28	32	30	26	26	30	29	27	28	28	P07355;P07355-2;A6NMY6	P07355;P07355-2;A6NMY6	Annexin A2;Putative annexin A2-like protein	ANXA2;ANXA2P2
1.0648	1.0188	1.039	0.93227	0.7738	1.4556	0.6803	1.0044	0.81036	0.81211	1.0213	1.0378	0.78567	0.81626				20	20	20	31.8	31.8	31.8	81.889	0	35664000000	17386000000	18278000000	10	12	13	11	12	11	14	9	13	8	11	10	8	11	P07384	P07384	Calpain-1 catalytic subunit	CAPN1
1.0057	0.94571	1.025	0.9936	0.73834	1.4779	0.64207	1.0433	0.70368	0.80354	0.79046	0.80769	0.7635	0.73071				30	7	6	65.1	20.7	17.3	49.67	0	1647300000000	853950000000	793310000000	25	25	25	26	25	24	26	23	23	23	23	23	22	22	P07437	P07437	Tubulin beta chain	TUBB
1.0079	0.83223	0.78296	0.78182	0.58529	1.162	0.47451	0.99641	0.63157	0.7807	0.74659	0.69371	0.77133	0.70164				19	19	19	38.5	38.5	38.5	58.112	0	312490000000	179070000000	133430000000	15	13	14	16	13	14	15	16	15	16	16	17	16	16	P07602;P07602-2;P07602-3	P07602;P07602-2;P07602-3	Proactivator polypeptide;Saposin-A;Saposin-B-Val;Saposin-B;Saposin-C;Saposin-D	PSAP
1.0579	0.96328	0.94528	0.88022	0.73967	1.3166	0.59126	1.0381	0.68283	0.89828	0.84918	0.85683	0.72746	0.81473				17	17	17	32.6	32.6	32.6	63.111	0	63346000000	34563000000	28783000000	13	15	11	13	11	10	10	7	8	9	10	9	8	9	P07686	P07686	Beta-hexosaminidase subunit beta;Beta-hexosaminidase subunit beta chain B;Beta-hexosaminidase subunit beta chain A	HEXB
1.0359	0.90184	0.83377	0.81609	0.64042	1.0773	0.4811	1.0786	0.76127	0.9046	0.82787	0.98644	0.89758	0.82017				6	6	5	20.4	20.4	18.3	37.564	0	18614000000	10393000000	8220500000	5	4	5	4	5	6	5	3	3	3	3	3	3	3	P07711;P43235;Q5NE16	P07711	Cathepsin L1;Cathepsin L1 heavy chain;Cathepsin L1 light chain	CTSL1
1.0006	0.87088	0.91299	0.93694	0.74825	1.276	0.57644	1.0408	0.73474	0.85165	0.82244	0.85187	0.77893	0.78947				16	16	16	97.1	97.1	97.1	15.054	0	3101700000000	1668000000000	1433700000000	15	13	14	14	13	15	13	14	12	11	12	13	12	12	P07737;CON__P02584	P07737	Profilin-1	PFN1
NaN	NaN	1.0343	NaN	0.70562	NaN	NaN	NaN	NaN	NaN	NaN	NaN	NaN	NaN				3	3	3	13.1	13.1	13.1	30.005	0	1301500000	711100000	590370000	0	1	2	1	2	1	1	0	1	0	1	0	0	0	P07738	P07738	Bisphosphoglycerate mutase	BPGM
1.0021	1.0366	1.0524	0.97577	0.75702	1.3013	0.61441	1.006	0.72828	0.76299	0.77909	0.77857	0.72372	0.70986				10	10	10	48.9	48.9	48.9	19.608	0	126420000000	64366000000	62050000000	7	7	7	7	7	7	7	7	7	7	7	7	7	7	P07741;P07741-2	P07741;P07741-2	Adenine phosphoribosyltransferase	APRT
0.99714	0.90793	0.89793	0.95792	0.72439	1.3127	0.61651	1.034	0.71957	0.84001	0.85886	0.88185	0.81525	0.73614				87	87	86	59.2	59.2	59.2	170.59	0	1750400000000	959230000000	791140000000	69	66	69	70	71	69	70	68	71	68	74	68	67	70	P07814	P07814	Bifunctional glutamate/proline--tRNA ligase;Glutamate--tRNA ligase;Proline--tRNA ligase	EPRS
1.0212	0.82507	0.81965	0.86907	0.71227	1.0419	0.536	NaN	0.82126	NaN	1.0812	1.6427	0.71767	0.75826				5	5	5	18.9	18.9	18.9	37.821	0	11491000000	6425000000	5066400000	4	4	5	4	4	4	4	2	3	3	4	3	3	3	P07858	P07858	Cathepsin B;Cathepsin B light chain;Cathepsin B heavy chain	CTSB
NaN	NaN	NaN	NaN	NaN	NaN	NaN	NaN	NaN	NaN	NaN	NaN	NaN	NaN				3	2	2	6.6	3	3	36.311	0.00058985	7424300000	7424300000	0	2	2	1	2	2	2	2	2	3	2	3	3	1	3	P07864	P07864	L-lactate dehydrogenase C chain	LDHC
0.98373	0.86242	0.87805	0.90727	0.69636	1.2629	0.5967	1.0061	0.72682	0.8445	0.82453	0.88078	0.78352	0.76162				52	36	33	66.4	50.5	46	84.659	0	4417100000000	2506000000000	1911200000000	49	48	49	49	47	48	49	43	46	40	41	42	42	41	P07900;P07900-2;Q14568;Q58FG1	P07900;P07900-2	Heat shock protein HSP 90-alpha	HSP90AA1
0.97377	0.93663	1.007	0.93161	0.72984	1.2659	0.55985	0.98178	0.68334	0.88481	0.78331	0.85984	0.82119	0.75076				22	22	15	58	58	46.4	32.337	0	1843200000000	965600000000	877630000000	20	18	19	20	17	21	19	14	17	17	16	17	15	17	P07910-2;P07910;P07910-4;P07910-3;Q86SE5;Q86SE5-3	P07910-2;P07910;P07910-4;P07910-3	Heterogeneous nuclear ribonucleoproteins C1/C2	HNRNPC
0.92533	0.87669	0.85565	0.89043	0.67294	1.2528	0.56945	1.0213	0.99053	1.3436	1.3691	1.3697	1.3489	1.0741				6	6	6	67	67	67	10.739	0	97663000000	50144000000	47519000000	6	6	6	6	6	6	6	5	5	4	4	5	5	4	P07919;A0A096LP55	P07919;A0A096LP55	Cytochrome b-c1 complex subunit 6, mitochondrial	UQCRH
0.96787	0.8955	1.0861	1.0012	0.77056	1.5243	0.58119	1.0907	0.80273	NaN	0.84717	1.0049	NaN	NaN				19	19	19	14.7	14.7	14.7	198.04	0	7222300000	3654900000	3567500000	10	9	11	9	11	10	8	6	6	8	7	4	6	6	P07942	P07942	Laminin subunit beta-1	LAMB1
1.1334	1.1539	1.4355	1.0116	0.79946	1.6901	0.66631	1.0804	0.84354	0.71854	0.86261	0.96225	NaN	NaN				14	14	9	31.3	31.3	23.2	60.801	0	15147000000	8042400000	7104600000	5	6	6	7	7	5	7	7	4	5	3	5	2	2	P07947;P12931;P12931-2	P07947	Tyrosine-protein kinase Yes	YES1
NaN	NaN	NaN	NaN	NaN	NaN	NaN	1.1437	0.51971	0.87302	0.83842	0.80048	0.61363	0.72137				8	6	1	18.5	15.5	2.9	56.033	0	2333500000	1317200000	1016300000	3	3	4	4	2	3	2	4	4	4	3	3	3	3	P07948-2	P07948-2	Tyrosine-protein kinase Lyn	LYN
1.2051	1.0369	NaN	NaN	0.83225	1.3901	0.47125	NaN	NaN	NaN	NaN	NaN	NaN	NaN	+			22	1	1	50.4	2.5	2.5	32.85	1	5515800000	2825700000	2690000000	19	19	17	16	18	19	18	14	14	14	17	14	13	15	P07951	P07951	Tropomyosin beta chain	TPM2
1.0338	0.92184	0.93384	0.95079	0.78412	1.434	0.5592	0.99327	0.67479	0.78572	0.74095	0.7719	0.71254	0.68416				26	14	0	57	34.2	0	32.989	0	295300000000	161080000000	134210000000	21	21	19	17	19	22	20	15	15	15	18	15	14	17	P07951-2	P07951-2	Tropomyosin beta chain	TPM2
NaN	NaN	NaN	NaN	NaN	NaN	NaN	NaN	NaN	NaN	NaN	NaN	NaN	NaN	+			22	1	1	60.1	4.8	4.8	28.684	1	74580000	0	74580000	17	16	15	14	15	18	16	11	10	11	13	11	11	12	P07951-3	P07951-3	Tropomyosin beta chain	TPM2
1.001	0.85341	0.87873	0.83255	0.64523	1.2463	0.54046	0.99705	0.67837	0.78869	0.80043	0.77944	0.74468	0.7246				25	25	25	52.9	52.9	52.9	50.212	0	902910000000	494610000000	408310000000	24	24	23	23	22	21	23	16	16	16	16	15	17	16	P07954-2;P07954	P07954-2;P07954	Fumarate hydratase, mitochondrial	FH
NaN	NaN	NaN	NaN	NaN	NaN	NaN	NaN	NaN	0.82196	0.74392	0.78386	NaN	0.80923				1	1	1	3.7	3.7	3.7	32.562	0.0022753	770010000	400280000	369730000	1	1	1	1	0	1	0	1	0	1	1	1	1	1	P07992;P07992-4;P07992-2	P07992;P07992-4;P07992-2	DNA excision repair protein ERCC-1	ERCC1
0.99969	0.8983	0.88889	0.82562	0.67412	1.0326	0.53561	0.88462	0.52473	0.82312	0.71771	0.8251	0.62304	0.63242			+	14	14	13	15.8	15.8	14.6	129.38	0	9501400000	5297000000	4204400000	8	4	4	8	6	4	6	7	6	6	4	3	2	3	P07996;P07996-2;CON__Q28194	P07996;P07996-2;CON__Q28194	Thrombospondin-1	THBS1
1.1532	NaN	NaN	0.98014	0.97309	NaN	0.77628	1.2314	NaN	NaN	NaN	NaN	NaN	NaN				4	4	4	7.9	7.9	7.9	80.692	0	7557800000	3742300000	3815400000	3	2	3	2	2	3	2	2	3	3	3	1	2	1	P08047;P08047-3;P08047-2	P08047;P08047-3;P08047-2	Transcription factor Sp1	SP1
NaN	NaN	NaN	NaN	NaN	NaN	NaN	NaN	NaN	NaN	NaN	NaN	NaN	NaN				1	1	1	0.9	0.9	0.9	154.79	0.0013467	398050000	235310000	162740000	0	1	1	1	1	0	0	1	1	1	1	1	1	1	P08069	P08069	Insulin-like growth factor 1 receptor;Insulin-like growth factor 1 receptor alpha chain;Insulin-like growth factor 1 receptor beta chain	IGF1R
0.99286	0.87608	0.90951	0.82133	0.6616	1.3654	0.54047	0.99708	0.72183	0.80479	0.79477	0.78972	0.69698	0.69689				38	38	38	58.4	58.4	58.4	75.872	0	446830000000	242160000000	204680000000	33	33	33	32	34	33	30	33	33	32	32	33	31	31	P08133;P08133-2	P08133;P08133-2	Annexin A6	ANXA6
NaN	0.99151	1.063	0.98696	0.96511	1.7477	1.6577	NaN	0.76799	NaN	NaN	0.53245	1.5395	1.0123				10	3	3	47.7	20.2	20.2	22.006	0	21009000000	12399000000	8610300000	9	8	9	9	10	9	8	7	8	9	8	7	8	9	P08134	P08134	Rho-related GTP-binding protein RhoC	RHOC
1.0213	0.92297	0.96338	0.84653	0.82525	1.3088	0.55305	1.0493	0.69723	0.82993	0.82217	0.75282	0.80116	0.8209				19	19	19	46.4	46.4	46.4	48.717	0	364650000000	197470000000	167180000000	13	14	14	14	13	14	12	15	14	13	16	14	16	16	P08174-2;P08174;P08174-4;P08174-3;P08174-5;P08174-6;P08174-7	P08174-2;P08174;P08174-4;P08174-3;P08174-5;P08174-6;P08174-7	Complement decay-accelerating factor	CD55
0.89443	0.93754	0.83108	0.77148	0.64226	1.3602	0.55487	1.081	0.7267	0.91639	0.82754	0.87073	0.78473	0.7674				21	21	17	21.2	21.2	17.8	141.48	0	24829000000	14448000000	10381000000	5	8	9	7	8	9	10	10	11	6	8	10	10	10	P08183;P08183-2	P08183;P08183-2	Multidrug resistance protein 1	ABCB1
0.99452	0.84657	0.89931	0.83	0.70015	1.2451	0.59633	1.0024	0.67327	0.81296	0.80936	0.79398	0.719	0.74054				31	31	1	53	53	2.7	67.993	0	3617900000000	1962900000000	1655000000000	22	21	20	24	23	21	23	25	26	24	25	27	24	25	P08195	P08195	4F2 cell-surface antigen heavy chain	SLC3A2
NaN	NaN	NaN	NaN	NaN	NaN	NaN	NaN	NaN	NaN	NaN	NaN	NaN	NaN				30	1	1	58.4	1.7	1.7	57.944	0.0099386	143420000	102690000	40730000	21	20	20	23	23	22	23	24	24	23	24	26	23	24	P08195-2	P08195-2	4F2 cell-surface antigen heavy chain	SLC3A2
NaN	NaN	NaN	NaN	NaN	NaN	NaN	NaN	NaN	NaN	NaN	NaN	NaN	NaN				31	1	1	61.4	5.6	5.6	61.815	0	47930000	0	47930000	22	20	20	23	22	21	23	25	25	24	25	27	24	25	P08195-3;P08195-4	P08195-3;P08195-4	4F2 cell-surface antigen heavy chain	SLC3A2
1.0058	0.86623	0.9452	0.95648	0.72988	1.2302	0.62296	1.0222	0.76263	0.91294	0.86498	0.96754	0.75254	0.73223				24	21	21	37.8	34.4	34.4	85.182	0	167700000000	89205000000	78497000000	19	22	19	22	21	18	20	21	22	22	22	21	21	22	P08237;P08237-3;P08237-2	P08237;P08237-3;P08237-2	6-phosphofructokinase, muscle type	PFKM
0.99233	0.9083	0.89199	0.92495	0.71527	1.2905	0.59334	1.0128	0.70146	0.80727	0.8115	0.83998	0.76465	0.71897				56	56	36	59.9	59.9	38.8	83.263	0	16110000000000	8795800000000	7314000000000	47	48	50	47	45	46	49	43	42	40	42	40	43	40	P08238;Q58FF7	P08238	Heat shock protein HSP 90-beta	HSP90AB1
1.0698	0.95407	0.97742	0.72116	0.77065	1.3777	0.60758	0.99174	0.7024	0.86417	0.89535	0.82503	0.8125	0.76608				24	24	24	41.7	41.7	41.7	69.81	0	158400000000	82569000000	75827000000	18	18	16	16	19	18	21	16	17	17	19	18	17	18	P08240;P08240-2	P08240;P08240-2	Signal recognition particle receptor subunit alpha	SRPR
1.021	0.96447	1.0539	1.0238	0.69227	1.4296	0.65749	0.98347	0.68296	0.78814	0.74805	0.81449	0.71911	0.71382				26	26	26	47.1	47.1	47.1	64.369	0	353780000000	187930000000	165850000000	15	11	14	14	12	13	12	16	13	17	16	13	16	16	P08243;P08243-2;P08243-3	P08243;P08243-2;P08243-3	Asparagine synthetase [glutamine-hydrolyzing]	ASNS
0.88501	1.1363	0.99111	0.86915	0.82564	1.7092	0.48137	0.93604	0.65136	NaN	0.89112	NaN	0.827	0.73782				7	7	7	19.9	19.9	19.9	39.33	0	8297900000	3718200000	4579700000	4	5	5	5	3	3	6	2	2	1	2	1	1	1	P08397;P08397-2;P08397-4;P08397-3	P08397;P08397-2;P08397-4;P08397-3	Porphobilinogen deaminase	HMBS
NaN	NaN	NaN	NaN	NaN	NaN	NaN	NaN	NaN	NaN	NaN	NaN	NaN	NaN				3	3	3	24.3	24.3	24.3	12.353	0	473440000	193630000	279810000	1	0	1	1	1	1	0	0	0	1	0	0	0	2	P08493;P08493-2	P08493;P08493-2	Matrix Gla protein	MGP
1.0397	0.87488	0.95924	0.87424	0.70146	1.1734	0.52366	0.97101	0.64222	0.80807	0.80898	0.74965	0.75221	0.70793				25	25	22	59.5	59.5	50.8	43.295	0	325600000000	172750000000	152850000000	21	22	18	22	19	18	22	20	19	19	17	18	19	17	P08559;P08559-4;P08559-3;P08559-2	P08559;P08559-4;P08559-3;P08559-2	Pyruvate dehydrogenase E1 component subunit alpha, somatic form, mitochondrial	PDHA1
NaN	NaN	NaN	NaN	0.89481	NaN	0.75022	NaN	NaN	NaN	NaN	NaN	NaN	NaN				3	3	3	2.6	2.6	2.6	167.55	0	2644700000	1721100000	923570000	1	1	2	2	2	1	2	1	1	1	0	0	0	1	P08572	P08572	Collagen alpha-2(IV) chain;Canstatin	COL4A2
0.96515	0.74259	0.85824	0.70885	0.64778	1.1759	0.62155	1.0283	0.69285	0.814	0.81806	0.76288	0.80749	0.86454				8	8	8	26.5	26.5	26.5	35.422	0	242710000000	130650000000	112060000000	8	8	8	8	8	8	8	8	7	7	7	8	7	8	P08574	P08574	Cytochrome c1, heme protein, mitochondrial	CYC1
0.86604	0.93963	0.89839	0.88725	0.83187	1.535	0.56059	NaN	1.3054	1.6817	NaN	NaN	1.7001	NaN				9	6	6	42.7	35.1	35.1	25.486	0	15050000000	7433200000	7616900000	6	7	5	7	5	5	6	4	5	5	4	3	4	3	P08579	P08579	U2 small nuclear ribonucleoprotein B	SNRPB2
1.0562	1.0728	0.66294	0.70354	NaN	NaN	0.30406	0.9784	NaN	NaN	NaN	NaN	NaN	0.73682				10	10	10	10.3	10.3	10.3	155.54	0	2770000000	1521400000	1248600000	3	4	3	3	1	3	3	5	1	2	1	1	0	2	P08581;P08581-2;P08581-3	P08581;P08581-2	Hepatocyte growth factor receptor	MET
1.0017	0.87473	0.97872	0.9161	0.76685	1.2705	0.6344	0.93564	0.75447	0.89995	0.88635	0.86951	0.7963	0.96474				24	24	24	52.9	52.9	52.9	51.556	0	138650000000	75571000000	63079000000	14	14	15	16	15	14	17	12	12	14	12	12	10	11	P08621;P08621-2;P08621-4;P08621-3	P08621;P08621-2;P08621-4	U1 small nuclear ribonucleoprotein 70 kDa	SNRNP70
1.1562	0.9133	0.96397	1.004	0.83602	1.0533	0.60002	0.93424	1.4379	1.2159	1.6064	1.8689	1.7264	1.3829				10	8	8	26.2	23.4	23.4	55.674	0	13641000000	6153200000	7487700000	6	5	4	8	7	6	5	4	3	4	4	6	4	4	P08651;P08651-4;P08651-5;P08651-3;P08651-6;P08651-2	P08651;P08651-4;P08651-5;P08651-3;P08651-6;P08651-2	Nuclear factor 1 C-type	NFIC
1.0134	0.92248	0.98084	0.87761	0.7669	1.244	0.59452	0.99605	0.68314	0.85342	0.8566	0.88801	0.82875	0.78444				62	62	55	95.1	95.1	91.4	53.651	0	10347000000000	5618000000000	4728700000000	54	51	51	56	53	55	52	49	49	48	47	50	45	46	P08670;P41219;P41219-2;P12036;P12036-2	P08670	Vimentin	VIM
0.91862	0.92339	0.89573	0.85018	0.67891	1.1903	0.5589	1.0169	0.76836	0.84936	0.917	0.87424	0.8116	0.81117				9	9	9	71.1	71.1	71.1	15.55	0	950920000000	502430000000	448490000000	6	6	7	5	5	7	5	6	6	6	7	6	6	6	P08708	P08708	40S ribosomal protein S17	RPS17
1.0315	0.9135	0.93479	0.84659	0.74786	1.2733	0.58038	1.0597	0.71442	0.89823	0.86847	0.91484	0.85945	0.75314				15	14	8	39.3	36.2	19.8	40.532	0	174190000000	93445000000	80748000000	12	11	12	13	12	12	14	10	10	9	8	9	10	9	P08754	P08754	Guanine nucleotide-binding protein G(k) subunit alpha	GNAI3
1.0466	0.97425	0.98061	0.92503	0.74456	1.4321	0.63794	1.0085	0.66935	0.79691	0.76216	0.69252	0.75037	0.73505				20	20	20	50	50	50	35.936	0	935500000000	501580000000	433920000000	19	19	19	19	19	20	19	18	17	18	17	17	18	17	P08758	P08758	Annexin A5	ANXA5
1.0386	0.98599	1.0682	1.0046	0.77803	1.4251	0.69022	1.0113	0.75614	0.82663	0.7998	0.86944	0.72593	0.72702				17	17	17	61.7	61.7	61.7	32.854	0	2179100000000	1143900000000	1035200000000	13	14	16	16	15	13	15	14	10	10	11	12	11	11	P08865	P08865	40S ribosomal protein SA	RPSA
1.0778	1.0327	0.98818	0.85884	0.73628	1.3932	0.55233	1.0034	0.68886	0.85272	0.80662	0.83047	0.8632	0.70918				4	4	4	16.8	16.8	16.8	25.636	0	75669000000	42851000000	32818000000	3	3	3	3	3	3	4	2	2	2	2	2	2	2	P08962;P08962-3;P08962-2	P08962;P08962-3;P08962-2	CD63 antigen	CD63
0.96582	0.92638	0.96678	0.83073	0.55064	1.2184	0.54808	1.1998	0.71841	0.75761	0.81577	0.68681	0.84488	0.68125				10	10	10	33	33	33	38.632	0	17502000000	8555200000	8947200000	7	6	6	7	6	5	7	5	4	4	1	4	4	3	P09001	P09001	39S ribosomal protein L3, mitochondrial	MRPL3
1.0201	1.033	1.1464	1.109	0.80707	1.5624	0.67249	1.0138	0.70583	0.89304	0.84669	0.96994	0.6927	0.80497				11	11	8	44	44	37.9	31.279	0	126150000000	69150000000	57005000000	8	6	6	7	7	5	6	6	5	6	7	6	6	7	P09012	P09012	U1 small nuclear ribonucleoprotein A	SNRPA
NaN	NaN	NaN	NaN	NaN	NaN	NaN	NaN	NaN	NaN	NaN	NaN	NaN	NaN				2	2	2	6.2	6.2	6.2	30.77	0.00039984	158530000	119900000	38624000	0	0	0	1	1	0	1	0	0	0	0	0	0	0	P09038;P09038-2;P09038-3;P09038-1	P09038;P09038-2;P09038-3;P09038-1	Fibroblast growth factor 2	FGF2
0.99237	0.94221	0.94823	0.96958	0.67745	1.3264	0.60479	1.0603	0.59445	0.79245	0.81898	0.7479	0.7786	0.70751				11	11	11	39.9	39.9	39.9	44.292	0	44068000000	24073000000	19995000000	7	8	9	7	7	6	8	6	6	7	7	7	8	7	P09110;P09110-2	P09110;P09110-2	3-ketoacyl-CoA thiolase, peroxisomal	ACAA1
0.82206	0.86549	0.79624	0.61248	0.64601	1.2213	0.69955	NaN	NaN	NaN	NaN	NaN	NaN	NaN				5	5	5	42.4	42.4	42.4	16.156	0	6006600000	2828300000	3178300000	3	3	3	3	2	2	2	0	0	2	0	1	2	2	P09132;P09132-2	P09132	Signal recognition particle 19 kDa protein	SRP19
0.86577	0.96176	1.303	1.7074	1.3037	2.1612	1.706	1.0712	1.3354	1.4469	1.8501	2.0331	2.166	1.8982				4	4	4	25.2	25.2	25.2	17.394	0	91705000000	46641000000	45063000000	4	4	4	4	3	4	3	4	3	3	4	4	3	3	P09234	P09234	U1 small nuclear ribonucleoprotein C	SNRPC
0.97118	0.94321	0.98893	0.99422	0.80574	1.2993	0.68334	1.0241	0.82988	0.88203	0.88038	0.95494	0.87791	0.80898				12	12	12	94.1	94.1	94.1	14.716	0	1277000000000	683530000000	593480000000	9	9	9	9	9	10	10	9	11	10	8	10	10	9	P09382	P09382	Galectin-1	LGALS1
1.0782	0.92301	1.0444	1.0216	0.76165	1.3441	0.51234	0.97538	0.6605	0.73819	0.75804	0.81753	0.68383	0.71175				8	8	8	41.8	41.8	41.8	25.789	0	14759000000	8887000000	5872300000	4	6	6	5	5	6	6	7	5	4	4	4	3	4	P09417;P09417-2	P09417;P09417-2	Dihydropteridine reductase	QDPR
0.98516	0.76001	0.83762	0.96284	0.68859	1.214	0.70586	1.0077	0.71836	0.85879	0.85172	1.0315	0.96243	0.80712				14	14	9	48.4	48.4	29.8	24.893	0	627420000000	330050000000	297370000000	13	13	12	12	12	10	12	11	10	10	10	12	9	11	P09429;B2RPK0	P09429;B2RPK0	High mobility group protein B1;Putative high mobility group protein B1-like 1	HMGB1;HMGB1P1
1.0061	0.80863	0.84441	0.9205	0.73626	1.1438	0.50538	0.79998	0.65013	0.88524	0.83444	1.0123	1.023	0.70365				20	8	4	44	24.6	10.6	32.876	0	90938000000	49905000000	41033000000	16	16	14	14	14	16	15	11	12	10	14	11	9	9	P09493-3;P09493-4;P09493-10;P09493-9;P09493;P09493-8;P09493-7;P09493-6	P09493-3;P09493-4;P09493-10;P09493-9;P09493;P09493-8;P09493-7;P09493-6	Tropomyosin alpha-1 chain	TPM1
NaN	NaN	NaN	NaN	NaN	NaN	0.67142	NaN	NaN	NaN	NaN	NaN	NaN	NaN				14	4	2	40.8	14.7	9	28.385	0	8181300000	4226000000	3955300000	10	10	10	10	10	11	11	6	7	7	8	6	6	5	P09493-5	P09493-5	Tropomyosin alpha-1 chain	TPM1
1.0258	0.95578	0.93181	1.0238	0.80716	1.3753	0.58688	1.0031	0.77934	0.92622	0.90656	0.94088	0.77004	0.80026				10	10	10	37.6	37.6	37.6	23.662	0	324250000000	168920000000	155330000000	10	9	9	10	10	9	9	7	8	8	8	8	8	8	P09496-2;P09496;P09496-4;P09496-3;P09496-5	P09496-2;P09496;P09496-4;P09496-3;P09496-5	Clathrin light chain A	CLTA
1.0673	0.86451	0.87688	0.92844	0.72468	1.178	0.4538	1.1201	0.75689	0.85212	0.88165	0.8347	0.7017	0.8259				11	11	11	39.3	39.3	39.3	23.181	0	76684000000	41530000000	35153000000	6	5	6	6	7	6	9	7	7	8	8	6	6	5	P09497-2;P09497	P09497-2;P09497	Clathrin light chain B	CLTB
0.96871	0.88765	0.98569	0.78178	0.75087	1.3748	0.72547	0.94556	0.60644	0.87376	0.82008	0.68141	0.77532	0.92518				20	20	4	58.9	58.9	13.8	35.882	0	67580000000	41554000000	26026000000	13	12	11	12	14	11	13	9	11	8	8	9	9	10	P09525	P09525	Annexin A4	ANXA4
0.97104	0.83501	0.8867	0.91881	0.77716	1.3851	0.58676	1.0695	0.76223	0.85576	0.87402	0.85404	0.74152	0.77588				17	17	17	39.4	39.4	39.4	47.578	0	39570000000	20274000000	19295000000	10	10	13	12	13	9	9	7	6	7	8	6	6	7	P09543;P09543-2	P09543;P09543-2	2,3-cyclic-nucleotide 3-phosphodiesterase	CNP
NaN	NaN	NaN	NaN	NaN	NaN	NaN	NaN	NaN	NaN	NaN	NaN	1.0521	NaN				8	8	8	36.5	36.5	36.5	32.818	0	1044900000	264880000	780040000	0	3	3	2	2	1	2	2	2	3	2	2	4	1	P09601	P09601	Heme oxygenase 1	HMOX1
1.0009	0.83597	0.88504	0.90617	0.71365	1.1676	0.49806	1.0553	0.62549	0.78857	0.7856	0.74845	0.75	0.67874				17	17	17	35.4	35.4	35.4	54.177	0	398410000000	224760000000	173660000000	15	14	14	13	13	14	14	14	14	15	15	14	14	14	P09622;P09622-3;P09622-2	P09622;P09622-3;P09622-2	Dihydrolipoyl dehydrogenase, mitochondrial	DLD
0.94018	0.8682	1.0227	1.0258	0.80843	1.2561	0.99977	0.94345	0.91858	1.2721	1.0866	1.2894	0.98743	0.97572				24	23	1	62.6	62.6	8.9	38.746	0	2797200000000	1452200000000	1345100000000	18	18	18	18	18	17	18	20	20	19	20	19	19	19	P09651;P09651-3;Q32P51	P09651;P09651-3;Q32P51	Heterogeneous nuclear ribonucleoprotein A1;Heterogeneous nuclear ribonucleoprotein A1-like 2	HNRNPA1;HNRNPA1L2
NaN	NaN	NaN	NaN	NaN	NaN	NaN	NaN	NaN	NaN	NaN	NaN	NaN	NaN				24	1	1	76.6	14.1	14.1	34.196	0	901230000	291020000	610210000	17	18	18	19	19	17	19	19	20	19	19	20	20	20	P09651-2	P09651-2	Heterogeneous nuclear ribonucleoprotein A1	HNRNPA1
0.95513	0.949	0.86405	0.87065	0.70088	1.3469	0.69665	0.97576	0.68234	0.80896	0.80748	0.80335	0.73515	0.78116				16	16	16	46.3	46.3	46.3	28.415	0	142270000000	75987000000	66282000000	10	10	10	10	12	10	9	13	10	12	11	11	12	11	P09661	P09661	U2 small nuclear ribonucleoprotein A	SNRPA1
1.0483	0.93752	1.0081	0.80947	0.73863	1.3125	0.41174	1.0837	0.6299	0.78344	0.81022	0.70771	0.73609	0.71347				6	6	6	48	48	48	8.7813	0	116480000000	64669000000	51808000000	6	6	6	6	6	6	6	5	5	5	5	5	5	4	P09669	P09669	Cytochrome c oxidase subunit 6C	COX6C
0.99912	0.8959	0.88789	0.8686	0.70353	1.2388	0.58305	1.0322	0.69666	0.83642	0.83143	0.85221	0.78953	0.75506				49	49	49	47.8	47.8	47.8	113.08	0	1887700000000	1024300000000	863460000000	43	41	40	44	42	42	42	41	38	38	37	40	36	38	P09874	P09874	Poly [ADP-ribose] polymerase 1	PARP1
0.93701	0.95808	1.0678	0.91974	0.70667	1.1396	0.57687	1.0966	0.77389	0.85724	0.79663	0.82948	0.86691	0.75819				31	31	31	28.6	28.6	28.6	165.91	0	56853000000	31073000000	25781000000	12	14	13	13	12	9	9	15	18	17	15	12	12	18	P09884	P09884	DNA polymerase alpha catalytic subunit	POLA1
0.97904	0.94407	0.92076	0.98274	0.71839	1.3915	0.63422	1.0166	0.67724	0.80311	0.81734	0.7847	0.73304	0.71761				33	33	33	60.6	60.6	60.6	69.284	0	362700000000	196820000000	165880000000	25	24	25	22	25	23	25	21	22	24	24	27	22	24	P09960;P09960-4;P09960-2;P09960-3	P09960;P09960-4;P09960-2;P09960-3	Leukotriene A-4 hydrolase	LTA4H
1.0561	0.95985	1.082	0.99102	0.83629	1.5113	0.65547	1.0877	0.75735	0.84942	0.85542	0.84902	0.77688	0.70423				16	12	11	58.5	45.1	43.1	39.455	0	382280000000	208120000000	174160000000	10	8	8	10	9	9	11	6	9	7	7	8	5	6	P09972	P09972	Fructose-bisphosphate aldolase C	ALDOC
0.9587	0.61157	0.65715	0.66352	0.49851	0.87	0.73835	0.98916	0.8939	1.2019	1.2629	1.5049	1.1713	1.0992				7	5	5	56.2	56.2	56.2	13.553	0	346480000000	188510000000	157970000000	5	5	5	6	5	5	5	6	6	5	6	6	6	6	P0C0S5;Q71UI9;Q71UI9-2;Q71UI9-4;Q71UI9-3;Q71UI9-5	P0C0S5;Q71UI9;Q71UI9-2;Q71UI9-4;Q71UI9-3	Histone H2A.Z;Histone H2A.V	H2AFZ;H2AFV
NaN	NaN	NaN	NaN	NaN	NaN	NaN	NaN	NaN	NaN	NaN	NaN	NaN	NaN				1	1	1	14.3	14.3	14.3	30.632	0	0	0	0	0	0	0	0	0	0	0	0	0	0	0	1	0	0	P0C2W1	P0C2W1	F-box/SPRY domain-containing protein 1	FBXO45
1.2767	0.75941	0.89283	0.99674	0.83009	0.97056	0.43917	NaN	NaN	1.1285	NaN	0.81158	NaN	NaN				1	1	1	2.2	2.2	2.2	51.069	0.0078524	48716000000	25521000000	23195000000	1	1	1	1	1	1	1	1	1	1	1	1	0	0	P0C860	P0C860	Putative male-specific lethal-3 protein-like 2	MSL3P1
NaN	NaN	NaN	NaN	NaN	NaN	NaN	NaN	NaN	0.83084	NaN	NaN	NaN	NaN				3	3	3	12.4	12.4	12.4	51.391	0.0011669	1084800000	647960000	436810000	0	1	0	0	0	0	0	1	2	2	1	1	1	2	P0CG12	P0CG12	Chromosome transmission fidelity protein 8 homolog isoform 2	CHTF8
1.0948	1.2666	1.3612	1.435	1.0704	1.4995	0.95473	1.2491	0.7215	0.86253	0.72607	0.81067	0.75718	0.7805				6	6	5	28.3	28.3	25.4	27.507	0	16037000000	8038600000	7998600000	3	5	5	4	4	4	5	3	4	4	5	3	4	4	P0CG30;P0CG29	P0CG30;P0CG29	Glutathione S-transferase theta-2B;Glutathione S-transferase theta-2	GSTT2B;GSTT2
NaN	NaN	NaN	NaN	NaN	NaN	NaN	NaN	NaN	NaN	NaN	NaN	NaN	NaN				8	2	1	7.7	3	2.2	117.39	0.0099529	111000000	81542000	29459000	6	7	6	6	6	6	7	5	6	5	5	5	5	5	P0CG39	P0CG39	POTE ankyrin domain family member J	POTEJ
0.92444	0.84917	0.84805	0.78774	0.60537	1.0975	0.55361	0.99038	0.65853	0.89698	0.80441	0.81077	0.71505	0.7331				20	20	20	45.9	45.9	45.9	64.596	0	83073000000	46235000000	36838000000	14	14	12	13	11	11	14	15	15	12	12	14	12	14	P0CW18	P0CW18	Serine protease 56	PRSS56
1.2512	1.1305	NaN	NaN	0.81197	NaN	0.60186	NaN	NaN	NaN	NaN	NaN	NaN	NaN				2	2	2	15.7	15.7	15.7	16.445	0	1349100000	626530000	722570000	2	2	1	2	2	2	2	1	1	0	1	1	1	1	P0DI82;P0DI81;P0DI81-3	P0DI82;P0DI81;P0DI81-3	Trafficking protein particle complex subunit 2 protein TRAPPC2P1;Trafficking protein particle complex subunit 2	TRAPPC2P1;TRAPPC2
1.2611	0.9795	0.93267	0.90894	NaN	NaN	NaN	NaN	NaN	NaN	NaN	0.81953	NaN	NaN				5	5	3	24.7	24.7	16.9	34.196	0	2656500000	1336300000	1320200000	3	4	3	4	2	2	1	3	1	1	1	2	1	2	P0DMN0;P0DMM9;P0DMM9-3;P0DMM9-2;P50225-2	P0DMN0;P0DMM9;P0DMM9-3;P0DMM9-2
1.0115	0.89762	0.91396	0.94264	0.69526	1.2886	0.5952	1.0073	0.71198	0.85185	0.81503	0.87485	0.75258	0.73303				46	40	3	72.2	66.3	7	70.051	0	5040400000000	2632400000000	2408100000000	37	38	37	36	37	37	38	31	34	34	34	36	32	36	P0DMV9;P0DMV8	P0DMV9;P0DMV8
NaN	NaN	NaN	NaN	NaN	NaN	NaN	NaN	NaN	NaN	NaN	NaN	NaN	NaN	+			43	1	1	71	2	2	63.936	1	10296000000	5040900000	5254600000	34	35	34	33	33	34	34	28	31	31	31	33	29	33	P0DMV8-2	P0DMV8-2
0.99157	0.93545	0.90607	0.94929	0.68847	1.3303	0.62501	1.0034	0.64653	0.74696	0.72192	0.74596	0.71065	0.71602				6	6	6	32.1	32.1	32.1	27.872	0	103360000000	56374000000	46985000000	6	6	5	5	5	5	4	4	5	5	5	4	4	5	Q01081;Q01081-2;P0DN76;Q01081-4;Q8WU68;Q8WU68-3;Q01081-3;Q8WU68-2	Q01081;Q01081-2;P0DN76;Q01081-4	Splicing factor U2AF 35 kDa subunit	U2AF1
1.0597	0.99831	1.0505	1.0018	0.78937	1.4445	0.6664	0.9977	0.64361	0.75993	0.77315	0.7928	0.73008	0.69561				20	20	20	47.2	47.2	47.2	60.586	0	121350000000	66755000000	54592000000	10	12	10	12	13	12	13	12	12	10	8	11	11	11	P35520;P0DN79;P35520-2	P35520;P0DN79;P35520-2	Cystathionine beta-synthase	CBS
NaN	NaN	NaN	NaN	NaN	NaN	NaN	NaN	NaN	NaN	NaN	NaN	NaN	NaN				2	2	2	14.1	14.1	14.1	19.393	0	8397400000	4960400000	3437000000	1	1	1	1	1	1	1	1	2	2	1	2	1	1	P10109	P10109	Adrenodoxin, mitochondrial	FDX1
NaN	NaN	NaN	NaN	NaN	NaN	NaN	NaN	NaN	NaN	NaN	NaN	NaN	NaN				2	2	2	17.1	17.1	17.1	17.652	0	215570000	215570000	0	0	1	1	1	2	1	1	0	0	1	0	0	0	0	P10124	P10124	Serglycin	SRGN
1.0229	1.0304	1.0062	0.98193	0.7067	1.4511	0.59265	1.045	0.69722	0.82359	0.81759	0.81459	0.78158	0.72562				14	14	14	29.9	29.9	29.9	60.67	0	43688000000	23054000000	20635000000	5	8	9	10	9	9	10	8	9	9	7	7	7	8	P10155;P10155-3;P10155-5;P10155-4;P10155-2	P10155;P10155-3;P10155-5;P10155-4;P10155-2	60 kDa SS-A/Ro ribonucleoprotein	TROVE2
NaN	NaN	NaN	NaN	NaN	NaN	NaN	NaN	NaN	NaN	NaN	NaN	NaN	NaN				1	1	1	1.9	1.9	1.9	105.32	0	427100000	165330000	261770000	1	1	0	0	0	0	0	0	1	0	0	1	1	1	P10253	P10253	Lysosomal alpha-glucosidase;76 kDa lysosomal alpha-glucosidase;70 kDa lysosomal alpha-glucosidase	GAA
NaN	NaN	NaN	NaN	NaN	NaN	NaN	NaN	NaN	NaN	NaN	NaN	NaN	NaN				6	3	3	32.6	25.2	25.2	23.48	0	640820000	364930000	275880000	4	3	3	1	2	4	2	3	3	3	2	2	2	3	P10301	P10301	Ras-related protein R-Ras	RRAS
0.90987	0.94609	1.15	NaN	NaN	1.2988	NaN	1.0675	0.81235	1.084	0.93202	NaN	NaN	NaN				11	11	8	21.9	21.9	16.7	67.585	0	16372000000	8698400000	7673600000	3	1	3	3	3	3	4	5	4	2	4	2	1	1	P10398;P10398-2	P10398	Serine/threonine-protein kinase A-Raf	ARAF
1.0162	0.8625	0.89822	0.61119	0.65468	1.2394	0.46331	0.99415	0.63949	0.89682	0.89093	0.92316	0.81063	0.78965				9	9	1	31.1	31.1	7.3	21.865	0	2733400000000	1485800000000	1247600000000	7	7	7	7	6	7	7	6	7	6	6	9	7	6	P10412	P10412	Histone H1.4	HIST1H1E
0.96144	0.90138	0.91562	0.87807	0.6168	1.3291	0.525	1.0011	0.60158	0.77794	0.75862	0.70803	0.67002	0.71004				21	21	21	39.1	39.1	39.1	68.996	0	247330000000	138940000000	108390000000	13	13	13	12	12	15	14	13	13	13	14	14	12	12	P10515	P10515	Dihydrolipoyllysine-residue acetyltransferase component of pyruvate dehydrogenase complex, mitochondrial	DLAT
NaN	NaN	NaN	NaN	NaN	NaN	NaN	0.99435	0.79613	0.8579	0.70473	0.74471	0.83918	0.81344				11	11	9	9.4	9.4	8.1	212.88	0	4505500000	2520600000	1984800000	1	1	1	1	1	1	1	7	6	3	4	6	3	4	P10586;P10586-2;Q13332;Q13332-7;Q13332-5;Q13332-6;Q13332-3;Q13332-4;Q13332-2	P10586;P10586-2	Receptor-type tyrosine-protein phosphatase F	PTPRF
0.99547	0.87641	0.88828	0.91486	0.68401	1.3224	0.58595	1.0343	0.66243	0.78052	0.76937	0.77289	0.7504	0.73012				5	5	5	52.4	52.4	52.4	11.737	0	1832200000000	998390000000	833800000000	5	5	5	5	5	5	5	5	5	5	5	5	5	5	P10599;P10599-2	P10599;P10599-2	Thioredoxin	TXN
0.98239	0.79947	0.81893	0.7783	0.62507	1.1579	0.44919	0.92965	0.61363	0.78019	0.7364	0.79965	0.73054	0.72389				6	6	6	49.6	49.6	49.6	13.696	0	312190000000	175050000000	137140000000	5	5	5	5	5	4	5	4	4	4	4	5	4	3	P10606	P10606	Cytochrome c oxidase subunit 5B, mitochondrial	COX5B
0.96461	0.89526	1.0441	0.90485	0.70033	1.4624	0.58774	1.034	0.84692	0.93517	1.0582	1.3054	0.72178	0.96353				7	7	7	19	19	19	54.465	0	21146000000	11395000000	9750600000	4	5	5	5	5	5	5	5	5	5	4	5	5	5	P10619;P10619-2	P10619;P10619-2	Lysosomal protective protein;Lysosomal protective protein 32 kDa chain;Lysosomal protective protein 20 kDa chain	CTSA
1.0201	0.96766	0.89658	0.74139	0.68397	1.4394	0.52224	1.086	0.86903	0.83165	0.89372	0.70383	0.95332	0.75743				3	3	3	26.5	26.5	26.5	17.598	0	165450000000	87703000000	77747000000	2	2	2	2	2	2	2	2	2	2	2	2	2	2	P10620;P10620-2	P10620;P10620-2	Microsomal glutathione S-transferase 1	MGST1
0.99389	0.92748	0.97236	0.94349	0.77672	1.3634	0.58418	1.0561	0.70078	0.82092	0.72572	0.86386	0.81728	0.75347				19	19	16	45.7	45.7	38.6	42.981	0	62860000000	34377000000	28483000000	12	12	14	14	14	10	13	11	11	9	9	10	9	11	P10644;P10644-2	P10644;P10644-2	cAMP-dependent protein kinase type I-alpha regulatory subunit;cAMP-dependent protein kinase type I-alpha regulatory subunit, N-terminally processed	PRKAR1A
NaN	NaN	NaN	NaN	NaN	NaN	NaN	1.0392	NaN	NaN	NaN	NaN	NaN	NaN				6	6	6	33.6	33.6	33.6	35.015	0	2432500000	1406300000	1026200000	3	2	3	1	2	1	3	3	2	3	3	4	1	2	P10646;P10646-2	P10646;P10646-2	Tissue factor pathway inhibitor	TFPI
0.95547	0.98013	0.89512	0.98788	0.73788	1.3464	0.61302	1.0857	0.71597	0.81965	0.81415	0.79174	0.82137	0.77385				8	8	8	40.8	40.8	40.8	31.462	0	77655000000	41065000000	36590000000	4	5	4	5	4	4	5	6	7	6	6	6	7	7	P10768	P10768	S-formylglutathione hydrolase	ESD
1.013	0.87148	0.8578	0.87477	0.65375	1.1955	0.50916	1.017	0.64799	0.83461	0.82316	0.81857	0.79449	0.72504				42	42	42	77.5	77.5	77.5	61.054	0	7749700000000	4405700000000	3344100000000	37	37	36	37	35	35	34	35	34	34	33	34	34	33	P10809;P10809-2	P10809	60 kDa heat shock protein, mitochondrial	HSPD1
0.93014	0.8938	0.96554	0.83788	0.69497	1.2635	0.65615	0.90342	0.58972	0.77167	0.75394	0.78744	0.68683	0.70729				10	10	10	24.5	24.5	24.5	52.494	0	28670000000	15116000000	13554000000	5	6	6	6	7	6	5	6	5	3	4	5	4	5	P10909;P10909-4;P10909-5;P10909-2;P10909-3	P10909;P10909-4;P10909-5;P10909-2;P10909-3	Clusterin;Clusterin beta chain;Clusterin alpha chain	CLU
1.0119	0.91806	0.95807	0.90274	0.72837	1.2857	0.54529	1.0216	0.67887	0.8097	0.79197	0.82494	0.74443	0.72761				46	44	44	61.3	58.9	58.9	72.332	0	6921300000000	3762900000000	3158400000000	42	42	41	40	43	42	43	36	34	35	33	35	36	33	P11021	P11021	78 kDa glucose-regulated protein	HSPA5
1.304	0.99252	1.0173	1.0664	0.69734	1.2201	0.61709	1.0826	0.7203	0.65264	0.97221	NaN	0.71935	0.68839				19	19	19	18	18	18	177.6	0	7657300000	4316700000	3340600000	7	10	7	8	10	8	11	7	6	6	6	5	5	4	P11047	P11047	Laminin subunit gamma-1	LAMC1
1.2693	0.97409	1.1955	1.1546	0.75782	1.4079	0.85431	1.1993	0.74609	0.83458	0.87563	0.78139	0.80357	0.84459				5	5	5	14.7	14.7	14.7	48.344	0	12328000000	6852400000	5475800000	3	4	4	3	4	3	3	2	5	3	4	3	3	3	P11117;P11117-2	P11117;P11117-2	Lysosomal acid phosphatase	ACP2
0.9771	0.91359	0.94802	0.92334	0.72892	1.3094	0.61327	1.0095	0.72286	0.82593	0.82608	0.85574	0.78933	0.77599				48	47	31	68.6	68.6	54.8	70.897	0	10271000000000	5537700000000	4732900000000	39	38	38	40	40	40	38	32	34	32	32	35	33	34	P11142;P11142-2	P11142;P11142-2	Heat shock cognate 71 kDa protein	HSPA8
1.0109	0.93183	0.94169	0.86289	0.7168	1.2572	0.722	0.9308	0.70352	0.8285	0.84432	0.88244	0.8336	0.85936				10	10	10	14.4	14.4	14.4	54.083	0	159870000000	85669000000	74200000000	8	7	7	6	7	7	5	8	7	6	8	7	7	7	P11166	P11166	Solute carrier family 2, facilitated glucose transporter member 1	SLC2A1
NaN	NaN	1.2203	1.322	NaN	1.4953	0.85123	NaN	NaN	NaN	0.88643	NaN	NaN	NaN				4	4	4	8.5	8.5	8.5	53.924	0	11960000000	5287700000	6672000000	2	1	3	4	1	3	3	2	1	2	2	3	2	3	P11169;Q8TDB8;Q8TDB8-4;Q8TDB8-2;Q8TDB8-5	P11169;Q8TDB8;Q8TDB8-4;Q8TDB8-2;Q8TDB8-5	Solute carrier family 2, facilitated glucose transporter member 3;Solute carrier family 2, facilitated glucose transporter member 14	SLC2A3;SLC2A14
0.92806	0.94354	NaN	0.80546	0.69628	1.667	0.57063	1.1173	NaN	0.82979	0.68734	NaN	NaN	0.66037				11	9	9	14.2	11.3	11.3	97.016	0	5762400000	3383700000	2378700000	4	6	4	5	7	5	7	3	2	3	4	2	2	4	P11171;P11171-2;P11171-4;P11171-3;P11171-5;P11171-6;P11171-7	P11171;P11171-2;P11171-4;P11171-3;P11171-5;P11171-6;P11171-7	Protein 4.1	EPB41
1.014	0.83598	0.87413	0.99226	0.70474	1.2519	0.54712	1.0864	0.73462	0.87337	0.80389	0.83186	0.76407	0.76707				19	19	19	45	45	45	52.221	0	137330000000	76240000000	61089000000	10	12	10	11	11	11	11	10	10	13	12	12	11	11	P11172;P11172-3;P11172-2;P11172-4	P11172;P11172-3;P11172-2;P11172-4	Uridine 5-monophosphate synthase;Orotate phosphoribosyltransferase;Orotidine 5-phosphate decarboxylase	UMPS
0.97468	0.83979	0.88856	0.82698	0.66367	1.1794	0.4727	1.025	0.62446	0.78889	0.79301	0.76781	0.74271	0.70724				12	12	12	46.8	46.8	46.8	39.233	0	416270000000	215980000000	200290000000	11	11	11	10	10	11	10	11	11	11	11	11	11	12	P11177;P11177-2;P11177-3	P11177;P11177-2;P11177-3	Pyruvate dehydrogenase E1 component subunit beta, mitochondrial	PDHB
1.0164	0.84974	0.77254	0.89362	0.70365	1.084	0.79675	1.0071	0.6044	0.93701	0.72888	0.82611	0.69629	0.76738				20	20	20	46.3	46.3	46.3	53.486	0	51853000000	29728000000	22125000000	15	15	12	12	12	13	16	12	10	7	11	9	10	9	P11182	P11182	Lipoamide acyltransferase component of branched-chain alpha-keto acid dehydrogenase complex, mitochondrial	DBT
1.1061	0.94636	0.95041	0.92236	0.74555	1.3481	0.60121	1.0525	0.66413	0.8086	0.80649	0.76758	0.74211	0.68561				26	26	21	36.1	36.1	29.2	96.695	0	38551000000	20296000000	18255000000	12	13	15	14	12	14	14	14	14	13	14	11	13	17	P11216	P11216	Glycogen phosphorylase, brain form	PYGB
0.93762	0.84207	0.80457	0.87508	0.73141	1.305	0.59033	0.9878	0.65153	0.78319	0.75387	0.6913	0.65054	0.60301				4	4	2	22.8	22.8	14.1	23.567	0	38107000000	20726000000	17381000000	4	4	4	4	4	4	4	2	2	3	2	3	2	2	P11233	P11233	Ras-related protein Ral-A	RALA
0.91759	0.85566	0.9077	0.79472	NaN	NaN	0.53712	NaN	NaN	NaN	NaN	NaN	NaN	NaN				4	2	2	19.9	11.2	11.2	23.408	0	5401100000	2938300000	2462800000	4	4	4	4	3	3	4	3	4	3	3	3	3	3	P11234;P11234-3;P11234-2	P11234;P11234-3;P11234-2	Ras-related protein Ral-B	RALB
0.95826	0.87264	0.88861	0.81732	0.75109	1.2668	0.46331	1.0003	0.60556	0.76894	0.72286	0.74551	0.72751	0.6931				7	7	7	11.8	11.8	11.8	44.882	0	277920000000	159140000000	118780000000	6	6	6	6	6	6	6	6	6	5	5	4	6	5	P11279;P11279-2	P11279;P11279-2	Lysosome-associated membrane glycoprotein 1	LAMP1
0.974	0.87671	0.89211	0.85825	0.65196	1.1741	0.51056	1.0001	0.63122	0.76972	0.76106	0.79542	0.82631	0.69342				24	24	24	53.4	53.4	53.4	46.588	0	708870000000	401150000000	307720000000	17	16	16	17	17	17	19	17	16	15	16	16	15	15	P11310;P11310-2	P11310;P11310-2	Medium-chain specific acyl-CoA dehydrogenase, mitochondrial	ACADM
1.0055	0.93778	0.85001	0.6371	0.68614	1.2408	0.51793	0.98174	0.60608	0.8429	0.87697	0.85936	0.82657	0.73199				33	33	28	41.6	41.6	37.3	90.725	0	303740000000	163360000000	140370000000	28	30	27	29	33	30	29	23	24	22	24	23	26	26	P11387	P11387	DNA topoisomerase 1	TOP1
0.99592	0.93945	0.94407	0.73322	0.69885	1.3507	0.58955	1.0344	0.71269	0.94873	0.9542	0.9254	0.88097	0.83288				78	78	60	48	48	39.3	174.38	0	796890000000	424290000000	372600000000	61	64	66	61	66	61	63	57	49	54	53	55	55	52	P11388;P11388-2;P11388-3;P11388-4	P11388;P11388-2;P11388-3;P11388-4	DNA topoisomerase 2-alpha	TOP2A
0.98688	0.89399	0.99547	1.0172	0.72815	1.388	0.69885	0.98639	0.78552	0.93704	0.88672	0.97984	0.82007	0.79616				36	36	36	62.3	62.3	62.3	59.256	0	828160000000	425900000000	402270000000	26	29	26	26	25	26	26	29	26	25	28	27	28	27	P11413;P11413-2;P11413-3	P11413;P11413-2;P11413-3	Glucose-6-phosphate 1-dehydrogenase	G6PD
0.92077	0.96813	0.91548	0.90277	0.74074	1.3188	0.51466	0.98899	0.54245	0.76691	0.65586	0.72988	0.61245	0.54997				6	6	6	46.5	46.5	46.5	17.776	0	18979000000	10665000000	8313400000	5	5	5	4	5	4	6	5	5	4	5	5	5	5	P11441	P11441	Ubiquitin-like protein 4A	UBL4A
1.0353	0.93763	0.951	0.8831	0.65479	1.27	0.52776	1.0413	0.64511	0.80433	0.76415	0.75823	0.74079	0.69794				50	50	50	51.1	51.1	51.1	129.63	0	467420000000	262870000000	204560000000	36	38	37	37	38	35	35	37	39	37	36	33	38	38	P11498;P11498-2	P11498	Pyruvate carboxylase, mitochondrial	PC
1.0875	1.0135	1.0422	0.97688	0.87034	1.4149	0.70804	1.0236	0.70966	0.88646	0.80621	0.74521	0.73109	0.77376				15	15	15	4.7	4.7	4.7	426.74	0	710690000000	381990000000	328710000000	5	5	8	7	8	6	7	6	9	6	7	9	5	8	P11532;P11532-3;P11532-2;P11532-4;P11532-5;P11532-8;P11532-7;P11532-6;P11532-10;P11532-9	P11532;P11532-3;P11532-2;P11532-4;P11532-5;P11532-8;P11532-7;P11532-6;P11532-10;P11532-9	Dystrophin	DMD
0.9971	0.93352	0.96721	0.92706	0.71557	1.3362	0.57896	1.0216	0.68388	0.80574	0.77047	0.81119	0.74663	0.72353				56	56	54	55	55	53.8	101.56	0	985480000000	543920000000	441560000000	47	46	41	47	41	44	43	36	37	35	37	39	33	35	P11586	P11586	C-1-tetrahydrofolate synthase, cytoplasmic;Methylenetetrahydrofolate dehydrogenase;Methenyltetrahydrofolate cyclohydrolase;Formyltetrahydrofolate synthetase;C-1-tetrahydrofolate synthase, cytoplasmic, N-terminally processed	MTHFD1
0.99767	0.9485	0.90962	0.8774	0.68288	1.2771	0.63154	1.1258	0.73032	0.93426	0.78139	0.77498	0.84133	0.77717				52	52	52	29.9	29.9	29.9	274.37	0	120280000000	65944000000	54340000000	21	22	23	23	26	19	24	22	22	20	18	19	13	19	P11717	P11717	Cation-independent mannose-6-phosphate receptor	IGF2R
1.0312	0.94362	0.96745	0.99352	0.71826	1.4084	0.5849	1.0216	0.69351	0.80873	0.80702	0.78277	0.75609	0.68442				14	14	14	40.6	40.6	40.6	39.724	0	236670000000	125640000000	111030000000	11	11	12	12	10	12	12	11	13	12	12	12	12	12	P11766	P11766	Alcohol dehydrogenase class-3	ADH5
1.025	0.92495	0.97789	0.94315	0.74424	1.2215	0.67722	1.0106	0.89356	1.0606	0.95509	1.0168	0.92938	0.84026				10	9	9	41.6	38.9	38.9	33.729	0	11972000000	6466400000	5505200000	8	7	7	7	6	3	8	6	6	5	5	5	6	5	P11802;P11802-2	P11802	Cyclin-dependent kinase 4	CDK4
1.0265	1.0528	1.1573	0.89607	0.72504	0.9288	0.52537	1.0617	0.8256	0.88926	1.052	1.1426	0.73018	1.0711				16	6	5	50.9	21.7	17.6	34.769	0	14712000000	7367300000	7344700000	13	13	14	14	12	15	13	11	9	12	10	10	10	11	P11908;P11908-2	P11908;P11908-2	Ribose-phosphate pyrophosphokinase 2	PRPS2
0.99068	0.90659	0.94778	0.91724	0.71743	1.2443	0.58822	1.004	0.72231	0.85719	0.84218	0.87577	0.82079	0.77877				35	35	23	53.5	53.5	37.6	70.67	0	1845300000000	989910000000	855340000000	32	31	31	34	31	32	30	28	27	27	27	27	27	28	P11940;P11940-2;Q9H361;Q4VXU2;Q4VXU2-2	P11940;P11940-2;Q9H361	Polyadenylate-binding protein 1;Polyadenylate-binding protein 3	PABPC1;PABPC3
1.0094	0.94226	0.99915	0.98888	0.78481	1.3199	0.58851	0.96638	0.74349	0.83035	0.81462	0.82618	0.72099	0.73463				18	18	18	60.5	60.5	60.5	28.768	0	787780000000	419170000000	368620000000	15	16	16	16	16	15	17	13	13	15	12	13	14	13	P12004	P12004	Proliferating cell nuclear antigen	PCNA
0.99481	0.97635	1.0515	1.0276	0.79349	1.4321	0.61011	1.0077	0.73723	0.82556	0.83221	0.86157	0.72965	0.81981				26	26	19	47.2	47.2	33.4	57.41	0	130010000000	64298000000	65712000000	20	19	17	18	19	18	20	17	14	15	15	16	15	17	P12081;P12081-4;P12081-3;P12081-2	P12081;P12081-4;P12081-3;P12081-2	Histidine--tRNA ligase, cytoplasmic	HARS
0.9404	0.7377	0.91398	0.85934	0.58257	1.0713	0.76074	0.90569	0.59365	0.77666	0.78817	0.63036	1.0448	0.81324				23	7	7	65.1	19.5	19.5	33.064	0	28604000000	16515000000	12089000000	19	19	18	16	18	13	20	18	16	16	17	16	18	15	P12235	P12235	ADP/ATP translocase 1	SLC25A4
0.98714	0.94344	0.98461	0.84197	0.67576	1.2336	0.69271	0.95016	0.69147	0.91724	0.88805	0.80855	0.93551	0.82667				25	9	5	66.1	35.9	18.1	32.866	0	223940000000	113030000000	110900000000	20	22	21	22	21	20	21	17	17	18	17	17	16	17	P12236	P12236	ADP/ATP translocase 3	SLC25A6
0.97616	0.9168	0.92956	0.88919	0.70976	1.2451	0.56834	1.0112	0.71135	0.81904	0.85444	0.83792	0.86311	0.77228				26	26	24	56	56	52.7	55.804	0	726810000000	393670000000	333140000000	23	24	24	24	24	24	24	21	22	23	23	24	22	23	P12268	P12268	Inosine-5-monophosphate dehydrogenase 2	IMPDH2
0.94301	0.84588	0.94965	0.91548	0.70035	1.2681	0.58097	0.96298	0.71564	0.88097	0.85206	0.89481	0.75157	0.77635				88	88	88	40.8	40.8	40.8	267.29	0	358310000000	187740000000	170570000000	62	67	64	66	59	68	61	43	46	43	40	43	45	42	P12270;P12270-2	P12270	Nucleoprotein TPR	TPR
1.0173	0.99217	1.0551	1.0144	0.74477	1.4259	0.69175	1.031	0.81576	0.89681	0.87174	0.93099	0.88417	0.84351				16	16	16	48.6	48.6	48.6	42.644	0	625280000000	330110000000	295170000000	14	14	13	15	14	16	14	11	11	11	11	12	11	11	P12277;P06732	P12277	Creatine kinase B-type	CKB
1.0739	1.0153	1.0163	0.99685	0.72287	1.39	0.53603	1.0001	0.79431	0.78509	0.77762	0.86569	0.76492	0.7453				22	22	22	60.4	60.4	60.4	36.375	0	135210000000	76553000000	58658000000	16	17	15	16	19	17	19	13	14	14	14	11	14	14	P12429	P12429	Annexin A3	ANXA3
1.0108	0.99081	1.0484	0.90759	0.66267	1.2879	0.74631	1.0175	0.57409	0.81326	0.73151	0.71209	0.88958	0.69457				14	14	14	41.2	41.2	41.2	47.036	0	88068000000	49508000000	38560000000	10	12	11	11	11	11	11	10	9	7	8	8	7	6	P12532;P12532-2;P17540	P12532;P12532-2	Creatine kinase U-type, mitochondrial	CKMT1A
NaN	NaN	NaN	NaN	NaN	NaN	NaN	1.1027	1.6474	0.83238	0.81246	0.80511	0.65344	0.68525				8	8	1	23.1	23.1	3.6	50.47	0	16667000000	9365000000	7302300000	2	3	1	1	0	2	1	4	2	3	4	6	4	3	P12694	P12694	2-oxoisovalerate dehydrogenase subunit alpha, mitochondrial	BCKDHA
0.96692	0.89528	0.93486	0.97495	0.69422	1.3427	0.63303	1.0153	0.76936	0.84254	0.86344	0.91457	0.80692	0.7552				52	29	27	63.7	41.9	40.2	103.06	0	378250000000	197810000000	180430000000	38	40	38	38	39	40	38	38	35	39	38	39	38	38	P12814;P12814-2;P12814-3;P12814-4;Q08043	P12814;P12814-2;P12814-3;P12814-4	Alpha-actinin-1	ACTN1
1.1254	1.1182	1.2213	1.0141	0.82539	1.4956	0.71596	0.95815	0.84057	0.85826	0.79374	0.79023	0.85032	0.7648				10	10	10	24.7	24.7	24.7	54.548	0	16692000000	9020700000	7671200000	5	6	5	5	6	6	7	5	5	4	4	3	4	6	P12955;P12955-3;P12955-2	P12955;P12955-3;P12955-2	Xaa-Pro dipeptidase	PEPD
0.97509	0.85637	0.896	0.88408	0.67989	1.1979	0.59929	1.0286	0.69829	0.83648	0.82046	0.86957	0.82009	0.75071				35	35	35	53.2	53.2	53.2	69.842	0	1173300000000	631750000000	541550000000	27	25	27	27	26	28	26	23	27	27	27	26	27	26	P12956;P12956-2	P12956;P12956-2	X-ray repair cross-complementing protein 6	XRCC6
0.98763	0.91724	0.91191	0.89999	0.68287	1.287	0.57035	1.0063	0.65968	0.80111	0.77404	0.80494	0.69713	0.70088				36	36	36	48.6	48.6	48.6	82.704	0	1270600000000	692600000000	578000000000	26	28	28	29	28	29	26	28	27	26	26	27	26	27	P13010	P13010	X-ray repair cross-complementing protein 5	XRCC5
NaN	NaN	NaN	NaN	NaN	NaN	NaN	NaN	NaN	NaN	NaN	NaN	NaN	NaN				2	2	2	6.7	6.7	6.7	34.645	0.0013558	184490000	122580000	61910000	0	0	0	0	0	0	0	0	1	0	0	1	1	1	P13051;P13051-2	P13051;P13051-2	Uracil-DNA glycosylase	UNG
1.032	0.9093	0.99683	0.80682	0.70699	1.1976	0.52338	1.0253	0.66	0.80492	0.85361	0.77505	0.77255	0.7355				9	9	9	42.6	42.6	42.6	19.576	0	334010000000	180010000000	154000000000	8	8	9	9	8	8	8	8	7	7	7	7	7	7	P13073	P13073	Cytochrome c oxidase subunit 4 isoform 1, mitochondrial	COX4I1
1.0353	0.8789	1.0095	0.8916	0.73352	1.0904	0.4725	0.9755	0.73682	0.84673	0.80298	0.98715	0.79144	0.87051				5	5	5	21.6	21.6	21.6	27.963	0	81693000000	44545000000	37148000000	3	3	4	4	4	4	4	2	3	2	3	3	4	3	P13284	P13284	Gamma-interferon-inducible lysosomal thiol reductase	IFI30
1.025	0.83002	0.93282	0.83632	0.74011	1.1642	0.73233	0.96413	0.62605	0.84548	0.79285	0.76316	0.86928	0.73512				4	4	4	8.3	8.3	8.3	44.96	0	23217000000	12717000000	10500000000	4	3	3	3	4	3	3	3	3	2	2	3	2	2	P13473;P13473-2;P13473-3	P13473;P13473-2;P13473-3	Lysosome-associated membrane glycoprotein 2	LAMP2
1.0087	1.0303	1.0891	0.97926	0.79547	1.4678	0.60457	1.0702	0.74451	0.89175	0.87516	0.8522	0.79586	0.82072				23	23	23	65.3	65.3	65.3	49.973	0	440690000000	224750000000	215940000000	20	19	20	19	19	20	20	18	19	18	16	17	18	16	P13489	P13489	Ribonuclease inhibitor	RNH1
NaN	1.0366	1.0763	NaN	NaN	0.77473	NaN	1.1374	NaN	NaN	NaN	NaN	NaN	NaN				3	3	3	13.3	13.3	13.3	21.012	0	3075900000	1491800000	1584200000	1	2	3	3	2	2	2	2	1	1	0	0	0	1	P13498	P13498	Cytochrome b-245 light chain	CYBA
0.98763	0.92132	0.91985	0.91642	0.72131	1.295	0.59256	1.0049	0.69869	0.79618	0.77825	0.83536	0.7798	0.70544				66	66	64	67.6	67.6	66.4	95.337	0	7238800000000	3864200000000	3374600000000	57	53	53	54	53	55	54	50	49	48	48	51	47	50	P13639	P13639	Elongation factor 2	EEF2
1.013	0.86123	0.8835	0.88364	0.67645	1.283	0.5717	0.97917	0.71828	0.83355	0.81038	0.89442	0.75864	0.73028				47	47	46	65.3	65.3	62.9	72.932	0	884530000000	476640000000	407890000000	36	39	40	39	37	38	37	40	39	40	39	39	41	39	P13667	P13667	Protein disulfide-isomerase A4	PDIA4
NaN	NaN	NaN	NaN	NaN	NaN	NaN	NaN	NaN	NaN	NaN	NaN	NaN	NaN				21	1	1	44	3.2	3.2	61.049	0.0097808	214560000	108400000	106160000	14	14	13	12	12	11	11	12	11	9	11	9	8	10	P13674	P13674	Prolyl 4-hydroxylase subunit alpha-1	P4HA1
1.035	0.87463	0.87461	0.86909	0.70092	1.2861	0.50286	1.0646	0.71032	0.73887	0.80801	0.87827	0.78598	0.76528				21	21	1	42.1	42.1	1.3	60.966	0	52067000000	28706000000	23361000000	14	14	14	12	12	12	11	11	11	9	11	9	8	10	P13674-2;P13674-3	P13674-2;P13674-3	Prolyl 4-hydroxylase subunit alpha-1	P4HA1
1.0469	0.95211	0.9669	0.92101	0.74083	1.3547	0.76338	1.0309	0.69941	0.81532	0.84625	0.83985	0.76623	0.77191				11	11	11	48.3	48.3	48.3	19.595	0	459410000000	249520000000	209900000000	7	7	7	7	7	7	7	8	9	7	8	7	9	9	P13693;P13693-2;Q56UQ5;Q9HAU6	P13693;P13693-2	Translationally-controlled tumor protein	TPT1
NaN	NaN	NaN	NaN	NaN	NaN	NaN	NaN	NaN	NaN	NaN	NaN	NaN	NaN				3	3	3	14.5	14.5	14.5	36.294	0	47507000	23763000	23744000	0	0	0	1	1	0	1	1	0	1	0	1	0	1	P13716;P13716-2	P13716;P13716-2	Delta-aminolevulinic acid dehydratase	ALAD
1.0031	0.93361	0.97302	0.97517	0.7226	1.314	0.58597	1.027	0.7478	0.80406	0.82367	0.83644	0.82058	0.76565				38	38	35	58.4	58.4	55.1	70.81	0	1317200000000	711420000000	605820000000	36	37	36	37	35	37	36	30	32	31	33	31	31	32	P13797;P13797-2;P13797-3;P13796	P13797;P13797-2;P13797-3	Plastin-3	PLS3
0.98784	0.98648	1.0363	1.0242	0.7881	1.4991	0.68046	1.0199	0.7254	0.79933	0.77566	0.86826	0.7738	0.72568				19	19	19	31	31	31	81.224	0	120190000000	65406000000	54786000000	14	15	16	15	14	15	16	12	15	11	13	13	13	13	P13798	P13798	Acylamino-acid-releasing enzyme	APEH
1.0135	0.89367	0.94927	0.92076	0.67715	1.1983	0.50291	1.0205	0.65588	0.80707	0.76723	0.76287	0.71441	0.68843				17	17	17	63.1	63.1	63.1	35.079	0	552210000000	299870000000	252340000000	14	14	13	13	14	14	13	13	14	14	14	13	14	12	P13804;P13804-2	P13804;P13804-2	Electron transfer flavoprotein subunit alpha, mitochondrial	ETFA
0.91531	0.97559	0.96725	0.96985	0.75884	1.3438	0.67435	1.0438	0.70233	0.8169	0.81339	0.84094	0.66053	0.66651				13	13	12	24.6	24.6	23.2	83.785	0	46087000000	23524000000	22564000000	9	10	9	7	8	11	10	10	9	10	10	12	12	10	P13807;P13807-2	P13807;P13807-2	Glycogen [starch] synthase, muscle	GYS1
1.0129	0.9859	0.99038	1.1432	0.73707	1.4698	0.88342	1.0122	0.73267	0.95985	0.85327	0.79402	0.89341	0.91957				17	17	17	47.5	47.5	47.5	45.518	0	85084000000	44888000000	40196000000	9	12	11	11	14	10	13	8	8	8	9	8	8	8	P13861;P13861-2;P31323	P13861;P13861-2	cAMP-dependent protein kinase type II-alpha regulatory subunit	PRKAR2A
1.0621	0.88194	0.98431	1.2442	0.75404	1.1738	0.51232	NaN	0.78058	0.71404	NaN	0.71449	0.64742	0.69999				12	8	6	35.5	24.2	17.3	46.986	0	19674000000	10494000000	9180400000	8	9	8	9	9	10	9	5	7	6	4	6	5	6	P13929;P13929-2;P13929-3	P13929;P13929-2;P13929-3	Beta-enolase	ENO3
1.0983	0.84336	0.78596	0.89753	0.67089	1.2883	0.59917	0.9482	0.89129	1.0245	0.99522	0.94714	0.68993	0.70274				13	13	13	53.4	53.4	53.4	28.38	0	20192000000	10640000000	9551400000	6	7	9	7	7	8	8	4	6	7	7	9	5	6	P13984	P13984	General transcription factor IIF subunit 2	GTF2F2
1.0111	0.95237	0.97138	0.84971	0.76216	1.2523	0.68527	0.98059	0.79375	0.91728	0.96716	1.0337	0.98285	0.92054				6	6	6	53.1	53.1	53.1	14.177	0	301040000000	158240000000	142800000000	3	3	3	3	4	3	4	5	4	5	4	5	3	4	P13987	P13987	CD59 glycoprotein	CD59
0.92671	0.79513	0.81493	0.73237	0.57315	1.1985	0.59927	0.97328	0.60219	0.81478	0.78975	0.74677	0.78153	0.74365				14	14	14	36.6	36.6	36.6	37.895	0	39255000000	22288000000	16967000000	9	9	6	9	10	9	9	8	7	6	5	6	5	7	P13995;P13995-2	P13995;P13995-2	Bifunctional methylenetetrahydrofolate dehydrogenase/cyclohydrolase, mitochondrial;NAD-dependent methylenetetrahydrofolate dehydrogenase;Methenyltetrahydrofolate cyclohydrolase	MTHFD2
1.0567	0.96211	0.99756	0.96826	0.74999	1.4046	0.59317	1.0669	0.8689	0.87868	0.79237	0.81002	0.89295	0.9934				7	7	7	52.2	52.2	52.2	12.476	0	912790000000	475690000000	437110000000	5	6	5	5	6	6	4	4	4	4	4	4	4	4	P14174	P14174	Macrophage migration inhibitory factor	MIF
1.1921	0.95332	0.94844	0.95943	0.86194	1.2038	0.51092	0.94794	0.75696	0.9514	0.76938	0.81465	0.72209	1.0168				3	3	3	28.6	28.6	28.6	18.848	0	22288000000	11870000000	10418000000	2	1	1	2	2	2	2	2	1	2	1	1	1	1	P14209;P14209-3;P14209-2	P14209;P14209-3	CD99 antigen	CD99
1.0007	0.88913	0.87641	0.91112	0.66337	1.2185	0.64648	1.0143	0.67218	0.82454	0.82051	0.85175	0.88121	0.76494				26	26	26	52.1	52.1	52.1	59.425	0	886980000000	482730000000	404250000000	22	22	21	21	22	20	21	17	17	17	17	17	15	16	P14314;P14314-2	P14314;P14314-2	Glucosidase 2 subunit beta	PRKCSH
1.054	0.97272	1.0306	0.9963	0.79536	1.4809	0.60094	1.0459	0.75232	0.8392	0.81634	0.87525	0.77903	0.81529				11	11	11	25.1	25.1	25.1	48.275	0	399530000000	208950000000	190580000000	9	10	9	10	9	9	9	8	9	8	9	8	8	9	P14324;P14324-2	P14324;P14324-2	Farnesyl pyrophosphate synthase	FDPS
0.82127	1.1246	1.0068	1.1382	0.85972	1.1917	0.65374	1.0148	0.75266	0.86945	0.82695	0.92309	0.77954	0.77582				14	14	14	32.9	32.9	32.9	58.489	0	13028000000	7244900000	5783200000	4	8	6	5	8	6	9	7	5	8	9	6	6	7	P14373;P14373-2	P14373;P14373-2	Zinc finger protein RFP	TRIM27
1.0991	0.93603	0.96626	0.83769	0.60809	1.2385	0.50399	0.99782	0.59831	0.79126	0.76231	0.6965	0.68465	0.60712				2	2	2	27.7	27.7	27.7	9.3959	0	102500000000	59088000000	43412000000	1	2	2	2	2	2	2	2	2	2	2	2	2	2	P14406	P14406	Cytochrome c oxidase subunit 7A2, mitochondrial	COX7A2
1.0256	0.98897	0.96102	0.97814	0.72928	1.3701	0.60518	0.99154	0.66986	0.76467	0.78533	0.77555	0.76315	0.73959				16	16	16	65.8	65.8	65.8	36.573	0	147540000000	83477000000	64065000000	10	13	9	11	11	12	11	10	10	10	11	11	8	9	P14550	P14550	Alcohol dehydrogenase [NADP(+)]	AKR1A1
0.98687	1.0194	1.0646	1.0289	0.77425	1.4544	0.67146	1.0145	0.80385	0.91994	0.89023	0.96578	0.79649	0.8339				43	43	5	78.7	78.7	9.4	57.936	0	6805200000000	3527800000000	3277400000000	36	34	34	36	36	37	37	32	32	33	31	33	31	31	P14618;P14618-3	P14618;P14618-3	Pyruvate kinase PKM	PKM
0.99915	NaN	NaN	NaN	NaN	1.5239	NaN	NaN	NaN	NaN	NaN	NaN	NaN	NaN	+			39	1	1	70.6	1.3	1.3	58.061	1	3213000000	1737700000	1475300000	32	30	30	32	32	33	33	28	28	29	27	29	27	27	P14618-2	P14618-2	Pyruvate kinase PKM	PKM
NaN	NaN	NaN	NaN	0.98151	NaN	NaN	NaN	NaN	NaN	NaN	NaN	NaN	NaN				4	4	4	39.4	39.4	39.4	11.139	0	347490000	252890000	94603000	1	1	1	1	2	0	1	0	0	0	0	0	0	0	P14621	P14621	Acylphosphatase-2	ACYP2
1.0298	0.9189	0.95781	0.94549	0.71375	1.3097	0.57465	0.99995	0.69955	0.85857	0.85095	0.83242	0.80463	0.75043				54	53	53	58.2	56.7	56.7	92.468	0	4038500000000	2149300000000	1889200000000	48	46	47	46	47	45	45	36	37	37	38	38	38	37	P14625;Q58FF3	P14625	Endoplasmin	HSP90B1
1.0263	0.63593	0.19323	0.15273	0.14678	0.22306	0.068712	1.0519	0.36558	0.22841	0.23857	0.21923	0.16905	0.14174				13	13	13	33	33	33	48.337	0	56457000000	41738000000	14718000000	9	9	8	7	8	9	8	9	7	8	8	8	5	8	P14635;P14635-2	P14635;P14635-2	G2/mitotic-specific cyclin-B1	CCNB1
NaN	1.002	NaN	NaN	NaN	NaN	0.79348	NaN	NaN	NaN	NaN	NaN	0.70199	NaN				7	4	4	30.8	19.2	19.2	22.764	0.00059078	1897900000	907040000	990880000	5	5	4	5	6	4	5	3	2	2	2	2	4	3	P14649	P14649	Myosin light chain 6B	MYL6B
1.0605	0.90293	0.96022	0.97783	0.74658	1.4112	0.53355	1.0219	0.78358	0.82888	0.88457	0.81884	0.71998	0.70264				8	8	8	25	25	25	24.61	0	241150000000	124540000000	116610000000	6	6	6	6	6	6	6	5	5	5	5	5	5	5	P14678;P63162;P14678-2;P63162-2;P14678-3	P14678;P63162;P14678-2;P63162-2;P14678-3	Small nuclear ribonucleoprotein-associated proteins B and B;Small nuclear ribonucleoprotein-associated protein N	SNRPB;SNRPN
1.0496	0.98491	1.0402	0.99702	0.78286	1.4179	0.71866	1.0352	0.74711	0.82445	0.8138	0.90734	0.76841	0.7222				33	33	33	34.2	34.2	34.2	117.97	0	158860000000	85476000000	73389000000	21	23	22	20	20	19	21	25	23	23	26	24	22	24	P14735;P14735-2	P14735	Insulin-degrading enzyme	IDE
0.99052	0.94056	0.88736	0.86555	0.71424	1.2223	0.71076	0.99669	0.64616	0.86486	0.79255	0.86724	0.86662	0.76274				7	7	7	75.6	75.6	75.6	10.192	0	149630000000	80736000000	68891000000	5	5	5	5	5	5	5	5	6	6	6	6	6	6	P14854	P14854	Cytochrome c oxidase subunit 6B1	COX6B1
NaN	NaN	NaN	NaN	NaN	NaN	NaN	NaN	0.77363	NaN	NaN	NaN	NaN	NaN				5	5	5	10.5	10.5	10.5	76.471	0	1638300000	804230000	834060000	1	4	2	1	3	1	0	0	3	2	2	3	1	3	P14859;P14859-4;P14859-5;P14859-3;P14859-2;P14859-6;P09086;Q9UKI9;P09086-4;Q9UKI9-3;Q9UKI9-2;P09086-3;P09086-2;P09086-5	P14859;P14859-4;P14859-5;P14859-3;P14859-2;P14859-6;P09086;Q9UKI9;P09086-4;Q9UKI9-3;Q9UKI9-2;P09086-3;P09086-2;P09086-5	POU domain, class 2, transcription factor 1;POU domain, class 2, transcription factor 2;POU domain, class 2, transcription factor 3	POU2F1;POU2F2;POU2F3
1.0189	0.90045	0.91505	0.88717	0.67864	1.2417	0.53941	1.013	0.70116	0.84077	0.80735	0.87169	0.75772	0.74845				27	27	26	63.3	63.3	62.1	64.132	0	1052700000000	581850000000	470860000000	22	22	21	24	21	21	22	21	22	21	21	21	21	22	P14866;P14866-2	P14866;P14866-2	Heterogeneous nuclear ribonucleoprotein L	HNRNPL
0.98792	0.99088	1.0308	0.99901	0.76545	1.3386	0.75919	0.98732	0.74235	0.85924	0.8219	0.93589	0.75234	0.70014				41	41	41	76.2	76.2	76.2	57.136	0	289830000000	154070000000	135760000000	30	31	31	35	31	31	31	31	27	31	28	27	26	25	P14868;P14868-2	P14868;P14868-2	Aspartate--tRNA ligase, cytoplasmic	DARS
1.0131	0.97228	0.97529	0.89975	0.6853	1.3833	0.54236	1.0476	0.72393	0.82482	0.81858	0.83377	0.69953	0.72213				31	31	28	56.4	56.4	51.3	81.744	0	172820000000	93023000000	79795000000	22	25	22	23	25	20	22	21	25	23	24	22	21	23	P14923	P14923	Junction plakoglobin	JUP
1.0143	0.84366	0.85603	0.79841	0.65512	1.2438	0.53914	1.011	0.69438	0.80587	0.86999	0.72462	0.74634	0.70868				8	8	8	57.7	57.7	57.7	13.53	0	202880000000	109940000000	92938000000	7	8	8	7	8	7	8	8	8	8	8	7	8	8	P14927;P14927-2	P14927;P14927-2	Cytochrome b-c1 complex subunit 7	UQCRB
NaN	NaN	NaN	NaN	NaN	NaN	NaN	NaN	NaN	NaN	NaN	NaN	NaN	NaN				5	3	2	7.8	5.4	3.9	84.436	0.0015317	256080000	98903000	157170000	1	0	2	1	0	1	0	0	0	0	1	0	2	1	P15056	P15056	Serine/threonine-protein kinase B-raf	BRAF
NaN	NaN	NaN	NaN	NaN	NaN	NaN	1.0572	NaN	1.0873	0.98133	0.82088	0.94814	0.78444				2	2	2	6.2	6.2	6.2	42.064	0.00039888	1855800000	943780000	911970000	1	0	1	1	0	2	1	2	1	2	2	2	2	2	P15104	P15104	Glutamine synthetase	GLUL
1.0058	0.8375	0.88827	0.88534	0.7174	1.2286	0.49719	0.99875	0.73469	0.86874	0.79611	0.8242	0.65554	0.74236				17	17	16	56.6	56.6	56.6	35.853	0	323160000000	180240000000	142910000000	14	14	14	16	13	15	12	14	14	14	13	14	12	13	P15121	P15121	Aldose reductase	AKR1B1
NaN	NaN	NaN	NaN	NaN	1.1527	1.5529	NaN	NaN	NaN	NaN	NaN	NaN	NaN				3	3	3	9.8	9.8	9.8	45.302	0	6715000000	4315800000	2399200000	1	2	2	1	1	2	2	2	2	1	1	1	1	0	P15151;P15151-3;P15151-2;P15151-4	P15151;P15151-3;P15151-2;P15151-4	Poliovirus receptor	PVR
1.0005	0.89694	0.93344	0.96884	0.75897	1.3507	0.58181	1.0423	0.75174	0.78032	0.83141	0.83825	0.81433	0.75847				28	28	28	47.9	47.9	47.9	68.699	0	526340000000	276030000000	250310000000	20	22	22	24	24	24	25	22	22	22	21	21	21	21	P15170-3;P15170-2;P15170;Q8IYD1	P15170-3;P15170-2;P15170	Eukaryotic peptide chain release factor GTP-binding subunit ERF3A	GSPT1
0.89582	0.86922	0.86105	0.78988	0.74774	1.2189	0.55641	1.0395	0.72512	0.84405	0.83104	0.867	0.7761	0.74939				5	5	5	16.1	16.1	16.1	43.92	0	25643000000	13858000000	11784000000	2	2	2	2	4	2	3	3	3	3	2	2	3	3	P15291;P15291-2	P15291;P15291-2	Beta-1,4-galactosyltransferase 1;Lactose synthase A protein;N-acetyllactosamine synthase;Beta-N-acetylglucosaminylglycopeptide beta-1,4-galactosyltransferase;Beta-N-acetylglucosaminyl-glycolipid beta-1,4-galactosyltransferase;Processed beta-1,4-galactosyltransferase 1	B4GALT1
1.0099	0.93942	0.98217	0.99164	0.80353	1.4101	0.64799	0.99908	0.75846	0.87028	0.8666	0.86471	0.86055	0.80892				50	50	36	63.1	63.1	47.1	69.412	0	1673100000000	873070000000	800010000000	42	41	42	44	42	44	41	35	33	33	35	34	32	34	P15311	P15311	Ezrin	EZR
1.058	0.97814	1.0585	0.89698	0.72297	1.2978	0.65297	1.0695	0.66748	0.87171	0.80133	0.72489	0.87338	0.83211				7	7	7	28	28	28	29.819	0	36712000000	20455000000	16257000000	6	5	5	6	6	7	6	5	6	6	6	6	6	6	P15328	P15328	Folate receptor alpha	FOLR1
NaN	NaN	NaN	NaN	NaN	NaN	NaN	NaN	NaN	NaN	NaN	NaN	NaN	NaN				2	2	2	13.1	13.1	13.1	54.537	0	61857000	0	61857000	0	0	0	1	0	0	0	0	0	0	0	1	0	0	P15336;P15336-4;P15336-5;P15336-3;P15336-7;P15336-2	P15336;P15336-4;P15336-5;P15336-3;P15336-7;P15336-2	Cyclic AMP-dependent transcription factor ATF-2	ATF2
0.98217	0.94264	0.95474	0.99142	0.78503	1.2848	0.61041	1.0093	0.74255	0.85756	0.84088	0.89602	0.84438	0.8144				10	10	10	57.4	57.4	57.4	26.182	0	93992000000	47058000000	46935000000	7	6	7	8	8	7	8	8	8	9	8	10	9	10	P15374	P15374	Ubiquitin carboxyl-terminal hydrolase isozyme L3	UCHL3
NaN	NaN	NaN	NaN	NaN	NaN	NaN	NaN	NaN	NaN	NaN	NaN	NaN	NaN				1	1	1	6.3	6.3	6.3	29.413	0.0011646	167620000	95952000	71672000	0	1	1	1	1	1	1	0	0	0	0	0	0	0	P15407	P15407	Fos-related antigen 1	FOSL1
0.94891	0.71187	0.7854	NaN	NaN	1.3982	0.39099	NaN	NaN	NaN	NaN	NaN	NaN	NaN				2	2	2	7.7	7.7	7.7	35.193	0	2659500000	1492500000	1167000000	1	1	1	1	1	2	1	0	1	1	1	1	1	1	P15408;P15408-3;P15408-2	P15408;P15408-3;P15408-2	Fos-related antigen 2	FOSL2
1.0548	0.86607	0.92894	0.90909	0.8596	1.1104	0.54794	0.95557	0.59076	0.53026	0.88768	0.7062	0.60004	0.58266				4	4	4	12.2	12.2	12.2	41.358	0	16999000000	11036000000	5963100000	3	3	3	3	3	3	3	4	4	3	3	4	3	4	P15529-4;P15529-16;P15529-7;P15529-6;P15529-3;P15529-5;P15529-2;P15529;P15529-15;P15529-9;P15529-12;P15529-14;P15529-8;P15529-11;P15529-13;P15529-10	P15529-4;P15529-16;P15529-7;P15529-6;P15529-3;P15529-5;P15529-2;P15529;P15529-15;P15529-9;P15529-12;P15529-14;P15529-8;P15529-11;P15529-13;P15529-10	Membrane cofactor protein	CD46
0.96327	0.86634	0.92723	1.0428	0.90112	1.2818	0.56707	1.0298	0.73708	0.84844	0.77087	0.85439	0.82234	0.7567				15	1	1	67.8	9.2	9.2	17.149	0	553750000000	292210000000	261540000000	11	12	12	11	12	11	12	9	9	9	10	9	10	9	P15531;P15531-2	P15531;P15531-2	Nucleoside diphosphate kinase A	NME1
1.0087	1.0029	0.9768	1.01	0.71584	1.3098	0.78741	1.007	0.70088	0.87602	0.81741	1.0428	0.88788	0.71481				11	11	11	38.7	38.7	38.7	30.867	0	288660000000	154490000000	134170000000	10	10	10	9	10	10	10	10	10	10	9	10	10	10	P15559;P15559-3;P15559-2	P15559;P15559-3;P15559-2	NAD(P)H dehydrogenase [quinone] 1	NQO1
1.0659	0.91898	0.88758	0.97215	0.59688	1.9541	0.541	0.97683	0.57985	0.75561	0.78677	0.82322	0.6903	0.65803				9	9	9	17.9	17.9	17.9	62.081	0	22216000000	11387000000	10829000000	6	5	7	8	4	5	4	6	4	5	5	6	5	5	P15586;P15586-2	P15586;P15586-2	N-acetylglucosamine-6-sulfatase	GNS
NaN	NaN	NaN	0.82217	NaN	NaN	NaN	NaN	NaN	NaN	NaN	NaN	NaN	NaN				5	5	5	16.3	16.3	16.3	46.442	0.0013498	302970000	172400000	130570000	0	1	0	2	0	0	2	1	0	0	0	0	0	0	P15735;P15735-2;Q16816;Q16816-2	P15735;P15735-2	Phosphorylase b kinase gamma catalytic chain, liver/testis isoform	PHKG2
0.97727	0.97229	1.009	0.87597	0.74861	1.311	0.54988	1.0057	0.72839	0.87169	0.88808	0.83912	0.78971	0.75323				24	24	24	61.1	61.1	61.1	31.324	0	1544500000000	819900000000	724560000000	21	19	20	20	21	19	19	16	15	15	14	16	14	15	P15880	P15880	40S ribosomal protein S2	RPS2
1.0008	0.91458	0.90537	0.85762	0.6699	1.1787	0.52953	0.99863	0.65592	0.81387	0.78216	0.82021	0.77962	0.70548				143	143	143	50.3	50.3	50.3	331.77	0	503660000000	272240000000	231410000000	100	102	95	104	97	90	96	78	78	76	71	78	71	75	P15924;P15924-3;P15924-2	P15924;P15924-3;P15924-2	Desmoplakin	DSP
1.0662	0.84802	1.0806	0.97614	0.7156	1.5947	0.57348	1.0149	0.75221	0.79102	0.83541	0.91098	0.86824	0.85851				6	6	6	31.9	31.9	31.9	29.247	0	55905000000	29943000000	25962000000	6	6	6	6	6	6	6	5	5	5	6	5	5	5	P15927;P15927-2;P15927-3	P15927;P15927-2;P15927-3	Replication protein A 32 kDa subunit	RPA2
1.0309	0.78816	0.77107	0.72965	0.66955	1.282	NaN	NaN	NaN	NaN	NaN	NaN	NaN	NaN				2	2	2	28.6	28.6	28.6	7.2454	0	25835000000	15165000000	10670000000	1	1	1	1	1	1	1	0	0	1	1	1	1	1	P15954	P15954	Cytochrome c oxidase subunit 7C, mitochondrial	COX7C
1.1292	0.67467	0.83908	1.0735	0.96532	1.2695	NaN	NaN	0.64136	0.7522	0.80489	0.7396	NaN	0.69121				3	3	3	21.4	21.4	21.4	24.399	0	2071400000	1227200000	844150000	3	1	1	1	2	1	2	1	1	2	1	2	1	2	P16035	P16035	Metalloproteinase inhibitor 2	TIMP2
NaN	NaN	NaN	NaN	NaN	NaN	NaN	NaN	NaN	NaN	NaN	NaN	NaN	NaN				4	4	4	4.3	4.3	4.3	118.92	0.0030126	11559000000	6275800000	5283400000	1	0	0	0	1	0	0	1	1	1	1	1	0	1	P16066	P16066	Atrial natriuretic peptide receptor 1	NPR1
1.061	1.0562	1.1145	0.86927	0.81198	1.4161	0.71676	1.0575	0.76263	0.87252	0.83861	0.83577	0.77859	0.81431				13	13	13	17.4	17.4	17.4	81.537	0	271630000000	138860000000	132770000000	10	11	11	10	10	10	10	10	8	7	8	8	8	8	P16070;P16070-18;P16070-12;P16070-14;P16070-13;P16070-11;P16070-10;P16070-16;P16070-8;P16070-17;P16070-6;P16070-4;P16070-3;P16070-7;P16070-5;P16070-15;P16070-9;P16070-19	P16070;P16070-18;P16070-12;P16070-14;P16070-13;P16070-11;P16070-10;P16070-16;P16070-8;P16070-17;P16070-6;P16070-4;P16070-3;P16070-7;P16070-5;P16070-15;P16070-9	CD44 antigen	CD44
1.002	0.85744	0.87695	0.87454	0.67142	1.2794	0.63661	1.0063	0.72488	0.7541	0.76249	0.7443	0.80986	0.73855				13	13	13	58.4	58.4	58.4	25.918	0	243480000000	133050000000	110430000000	8	7	6	8	7	7	7	8	9	8	8	7	5	7	P16083	P16083	Ribosyldihydronicotinamide dehydrogenase [quinone]	NQO2
1.0113	1.0387	1.0506	0.99569	0.74833	1.494	0.65026	1.0178	0.72938	0.87619	0.81406	0.88679	0.77781	0.75126				19	19	17	79.1	79.1	74.4	30.375	0	339920000000	182570000000	157350000000	17	18	16	15	15	17	15	15	18	14	16	16	16	16	P16152;P16152-2	P16152;P16152-2	Carbonyl reductase [NADPH] 1	CBR1
NaN	NaN	NaN	NaN	NaN	NaN	NaN	1.1171	0.63074	NaN	NaN	NaN	NaN	NaN				5	5	5	17.2	17.2	17.2	44.297	0	1503100000	880390000	622750000	0	1	2	1	3	2	0	2	2	3	1	2	1	2	P16219	P16219	Short-chain specific acyl-CoA dehydrogenase, mitochondrial	ACADS
1.0395	0.89786	0.92113	0.84967	0.6638	1.3106	0.53701	1.0023	0.74568	0.70548	0.71617	0.7896	0.64439	0.65345				4	4	2	17.6	17.6	12.9	36.688	0	14830000000	7909600000	6920200000	2	2	2	4	3	3	2	3	4	3	3	3	2	3	P16220;P16220-2;P16220-3	P16220;P16220-2;P16220-3	Cyclic AMP-responsive element-binding protein 1	CREB1
0.9956	0.9233	0.92261	0.90774	0.58557	1.2673	0.52939	0.94863	0.60931	0.79945	0.65168	0.7109	0.76735	0.62835				15	15	15	29	29	29	76.074	0	24586000000	13514000000	11072000000	8	7	6	6	7	9	7	10	10	9	7	8	9	9	P16278;P16278-3;P16278-2	P16278;P16278-3;P16278-2	Beta-galactosidase	GLB1
1.0641	0.91813	0.98935	1.0135	0.74971	1.3926	0.77532	1.0025	0.74608	0.91845	0.87124	0.9056	0.93498	1.5197				11	11	11	31.3	31.3	31.3	42.864	0	17612000000	9335900000	8275900000	5	5	9	7	8	8	7	5	6	4	5	4	5	3	P16333;P16333-2;O43639	P16333;P16333-2	Cytoplasmic protein NCK1	NCK1
1.0044	0.79349	0.82741	0.62098	0.62997	1.2098	0.44446	0.99462	0.63386	0.9099	0.98739	0.82954	0.78292	0.81173				8	6	6	29.6	22.6	22.6	22.58	0	919250000000	500610000000	418640000000	7	7	7	7	6	7	7	6	7	6	6	8	7	6	P16401	P16401	Histone H1.5	HIST1H1B
1.1868	NaN	0.92503	0.79871	0.708	1.0462	0.33509	1.1153	0.63808	1.125	NaN	1.2569	NaN	NaN				9	1	1	31.9	7.5	7.5	21.364	0	19400000000	12926000000	6474500000	7	7	7	7	6	7	7	6	7	6	6	9	7	6	P16403;P16402;Q02539	P16403;P16402	Histone H1.2;Histone H1.3	HIST1H1C;HIST1H1D
1.0219	0.93061	1.0002	0.73593	0.78516	1.3579	0.58728	1.0072	0.70579	0.86488	0.94316	0.83081	0.80264	0.7953				34	34	34	48.9	48.9	48.9	76.689	0	738360000000	398040000000	340320000000	24	26	28	25	26	25	27	24	25	25	24	24	25	23	P16435	P16435	NADPH--cytochrome P450 reductase	POR
NaN	NaN	NaN	NaN	NaN	NaN	NaN	NaN	NaN	NaN	NaN	NaN	NaN	NaN				5	3	3	12.4	7.4	7.4	37.221	0.0050186	2208400000	1103000000	1105400000	2	1	1	2	3	1	1	2	2	2	2	2	2	2	P16520;P16520-2	P16520;P16520-2	Guanine nucleotide-binding protein G(I)/G(S)/G(T) subunit beta-3	GNB3
0.97882	0.94605	0.96229	0.73707	0.73912	1.2897	0.68396	0.99071	0.69728	0.8861	0.94602	0.85143	0.81958	0.7832				50	50	32	44	44	29	114.76	0	457810000000	245360000000	212450000000	33	37	36	37	34	32	37	26	26	27	26	24	25	28	P16615;P16615-5;P16615-2;P16615-3;P16615-4	P16615;P16615-5;P16615-2;P16615-3;P16615-4	Sarcoplasmic/endoplasmic reticulum calcium ATPase 2	ATP2A2
1.0216	0.86183	0.92367	0.76566	0.64291	1.53	0.47356	0.71448	0.59205	0.67114	0.75211	0.7226	0.7666	0.70067				9	9	9	27.7	27.7	27.7	46.374	0	10164000000	5598200000	4566100000	4	4	4	4	3	4	4	4	6	3	4	4	4	7	P16930;P16930-2	P16930;P16930-2	Fumarylacetoacetase	FAH
0.94728	0.81618	0.87835	3.3043	0.78439	1.4455	2.1666	0.94882	0.70024	0.78191	0.81247	0.80217	0.79142	2.0215				7	7	5	39.6	39.6	28.2	17.302	0	128280000000	58989000000	69288000000	2	3	3	3	4	6	3	2	2	3	3	3	3	3	P16949;P16949-2	P16949;P16949-2	Stathmin	STMN1
0.859	1.0645	0.98513	NaN	1.0155	1.5249	1.1237	1.0056	0.69763	0.95919	0.79235	0.84218	1.0209	NaN				14	8	8	48.7	36.8	36.8	40.089	0	10204000000	4748200000	5456000000	6	8	9	8	9	6	7	6	5	8	6	7	7	5	P16989;P16989-2;P16989-3	P16989;P16989-2;P16989-3	Y-box-binding protein 3	YBX3
NaN	NaN	NaN	NaN	NaN	NaN	NaN	NaN	NaN	NaN	NaN	NaN	NaN	NaN				2	2	2	3	3	3	77.203	0.0055556	249250000	126460000	122790000	0	0	0	0	0	1	0	1	1	0	1	1	1	1	P17021;P17021-3;P17021-2	P17021;P17021-3;P17021-2	Zinc finger protein 17	ZNF17
NaN	0.83515	NaN	1.2078	NaN	1.3727	1.6854	NaN	NaN	NaN	NaN	NaN	NaN	0.93039				8	8	8	30.2	30.2	30.2	42.155	0	5991200000	3159700000	2831500000	3	4	4	5	2	2	2	2	1	2	2	1	2	2	P17028;P17028-2	P17028;P17028-2	Zinc finger protein 24	ZNF24
0.82446	1.1793	0.69267	NaN	0.88539	1.4061	NaN	NaN	NaN	NaN	NaN	NaN	NaN	NaN				2	2	2	5.7	5.7	5.7	63.629	0.00058962	1805700000	937560000	868120000	1	2	1	2	1	1	2	0	0	0	0	0	1	0	P17029	P17029	Zinc finger protein with KRAB and SCAN domains 1	ZKSCAN1
NaN	NaN	NaN	NaN	NaN	NaN	NaN	NaN	NaN	NaN	NaN	NaN	NaN	NaN				2	2	2	6.6	6.6	6.6	46.564	0	517480000	283560000	233920000	0	1	0	0	1	1	0	1	1	1	1	1	1	1	P17050	P17050	Alpha-N-acetylgalactosaminidase	NAGA
1.0571	1.107	0.99049	0.9068	0.94056	1.7406	0.90519	1.0073	0.69523	0.80504	0.78069	0.75479	0.7068	0.70122				13	3	3	16.5	4.8	4.8	71.027	0	745910000000	394430000000	351470000000	12	12	12	13	13	12	13	10	10	11	11	10	10	11	P17066;P48741	P17066;P48741	Heat shock 70 kDa protein 6;Putative heat shock 70 kDa protein 7	HSPA6;HSPA7
1.0151	2.0503	2.4856	2.7861	2.2853	4.8091	1.94	NaN	NaN	2.8832	3.2975	2.7267	3.7463	NaN				3	3	2	23.4	23.4	15	11.676	0	71058000000	30793000000	40265000000	3	3	3	3	3	3	3	2	2	3	3	3	3	3	P17096;P17096-3	P17096;P17096-3	High mobility group protein HMG-I/HMG-Y	HMGA1
NaN	NaN	NaN	NaN	NaN	NaN	NaN	NaN	NaN	NaN	NaN	NaN	NaN	NaN				2	1	1	14.6	14.6	14.6	10.679	0.00040535	0	0	0	1	1	2	2	2	1	1	0	1	2	2	2	1	1	P17096-2	P17096-2	High mobility group protein HMG-I/HMG-Y	HMGA1
0.93194	0.68833	0.86633	0.76687	0.58076	1.1198	0.38621	0.92718	0.55282	0.6417	0.70003	0.69629	0.63363	0.62141				5	5	5	26	26	26	21.541	0.00020416	12332000000	7138700000	5193700000	3	4	4	3	4	4	4	4	2	1	2	1	1	1	P17152	P17152	Transmembrane protein 11, mitochondrial	TMEM11
0.98271	0.93531	0.94151	0.96386	0.75761	1.3359	0.56229	0.99579	0.63922	0.7536	0.74444	0.81717	0.71329	0.6936				22	22	22	58.4	58.4	58.4	46.247	0	243660000000	135420000000	108240000000	13	16	16	14	15	15	14	17	16	17	18	15	16	16	P17174;P17174-2	P17174;P17174-2	Aspartate aminotransferase, cytoplasmic	GOT1
0.94004	0.83634	0.94299	1.4013	0.70779	1.3481	1.1532	NaN	NaN	NaN	0.84374	0.75635	NaN	0.73475				2	2	2	3.7	3.7	3.7	53.899	0.0030166	4889000000	2592400000	2296600000	1	1	1	1	1	1	1	0	0	1	1	1	2	1	P17213	P17213	Bactericidal permeability-increasing protein	BPI
1.1674	1.049	1.108	1.0511	0.845	1.3362	1.0006	1.1447	NaN	0.86377	0.8763	0.81117	1.3078	0.85363				11	11	9	26.8	26.8	21.3	76.749	0	9034300000	4986800000	4047500000	5	8	5	6	5	3	3	6	5	5	5	6	5	8	P17252;P05771;P05771-2	P17252	Protein kinase C alpha type	PRKCA
NaN	NaN	NaN	NaN	NaN	NaN	NaN	NaN	NaN	NaN	NaN	NaN	NaN	NaN				6	6	6	9.1	9.1	9.1	129.29	0	199550000	124970000	74584000	0	0	0	0	0	0	1	1	1	1	0	2	0	1	P17301	P17301	Integrin alpha-2	ITGA2
0.9861	0.94851	1.0194	0.88952	0.79935	1.3246	0.55279	0.95479	0.83146	1.0261	0.84137	0.97639	0.95511	0.92601				22	22	22	32.5	32.5	32.5	89.405	0	66219000000	34753000000	31466000000	17	16	15	16	16	18	17	11	11	13	14	11	13	12	P17480;P17480-2	P17480;P17480-2	Nucleolar transcription factor 1	UBTF
0.95062	0.80603	NaN	NaN	0.58597	NaN	NaN	NaN	NaN	NaN	NaN	NaN	NaN	NaN				3	3	3	14.1	14.1	14.1	35.173	0	1389500000	706570000	682960000	2	3	2	1	2	1	1	0	0	1	0	1	0	0	P17535	P17535	Transcription factor jun-D	JUND
0.78357	0.67988	0.63143	0.57809	NaN	0.87419	NaN	0.76247	NaN	NaN	0.63853	NaN	0.64276	NaN				3	3	3	9.3	9.3	9.3	52.967	0	32264000000	19042000000	13222000000	1	2	1	1	1	2	1	1	1	1	1	2	1	1	P17544;P17544-2;P17544-4;P17544-3;P17544-6;P17544-5	P17544;P17544-2;P17544-4;P17544-3;P17544-6	Cyclic AMP-dependent transcription factor ATF-7	ATF7
NaN	0.96267	1.1245	NaN	0.99307	1.4972	1.3395	NaN	0.8943	NaN	NaN	NaN	NaN	NaN				4	4	4	46.7	46.7	46.7	16.402	0	2499500000	1105200000	1394200000	1	2	3	1	2	2	3	1	1	0	0	1	1	1	P17568	P17568	NADH dehydrogenase [ubiquinone] 1 beta subcomplex subunit 7	NDUFB7
NaN	0.81073	1.0828	NaN	NaN	NaN	1.5015	NaN	NaN	NaN	1.5056	NaN	NaN	NaN				8	2	2	27.9	8.5	8.5	40.589	0	1503100000	737910000	765220000	6	4	4	4	5	4	4	3	7	3	4	3	3	3	P17612;P17612-2	P17612;P17612-2	cAMP-dependent protein kinase catalytic subunit alpha	PRKACA
0.97846	0.92888	0.95599	0.99269	0.72889	1.3245	0.63873	0.99765	0.83607	0.92266	0.89273	1.0466	0.88753	0.834				25	25	25	42.7	42.7	42.7	79.994	0	134340000000	69701000000	64641000000	13	16	16	16	16	17	15	14	16	13	14	15	14	13	P17655;P17655-2	P17655;P17655-2	Calpain-2 catalytic subunit	CAPN2
NaN	NaN	NaN	NaN	NaN	1.2021	NaN	NaN	NaN	NaN	NaN	NaN	NaN	NaN				2	1	1	6.8	3	3	38.224	0	5521400000	3398200000	2123300000	1	1	1	1	1	1	2	2	2	2	2	2	2	2	P17693	P17693	HLA class I histocompatibility antigen, alpha chain G	HLA-G
NaN	NaN	NaN	NaN	NaN	NaN	NaN	1.176	0.85426	NaN	0.72341	NaN	0.9175	NaN				5	5	5	17.6	17.6	17.6	48.473	0	4179100000	2154400000	2024700000	0	0	1	0	1	1	0	2	2	2	4	3	3	1	P17706;P17706-2;P17706-4;P17706-3	P17706;P17706-2;P17706-4;P17706-3	Tyrosine-protein phosphatase non-receptor type 2	PTPN2
0.96045	0.90386	0.97014	0.99583	0.74757	1.313	0.60424	1.0205	0.8192	0.89961	0.88467	0.92148	0.79261	0.78228				28	28	26	54.5	54.5	50.1	66.69	0	323080000000	168120000000	154960000000	22	25	25	23	21	18	24	18	17	16	19	21	21	18	P17812;P17812-2	P17812;P17812-2	CTP synthase 1	CTPS1
1.0138	0.92824	0.95477	0.90158	0.71804	1.2664	0.59308	1.0246	0.69005	0.8319	0.81815	0.85995	0.73958	0.75281				46	46	34	58	58	42.5	69.147	0	1936900000000	1049400000000	887500000000	40	39	39	40	43	42	40	35	34	32	32	33	33	33	P17844;P17844-2	P17844;P17844-2	Probable ATP-dependent RNA helicase DDX5	DDX5
1.0057	0.94952	0.9164	0.90301	0.67424	1.2535	0.69133	1.025	0.67296	0.79968	0.75085	0.88194	0.72727	0.77759				26	22	21	38.7	32.9	31.8	85.018	0	150080000000	82854000000	67228000000	17	20	18	19	16	16	17	21	21	21	22	20	19	21	P17858;P17858-2	P17858;P17858-2	6-phosphofructokinase, liver type	PFKL
1.003	0.97487	1.0257	0.92181	0.75994	1.3832	0.71186	1.0037	0.75781	0.821	0.84519	0.82593	0.84558	0.81183				11	11	11	35.2	35.2	35.2	26.152	0	321940000000	171740000000	150200000000	11	9	10	10	9	10	8	10	9	9	8	10	9	10	P17931	P17931	Galectin-3	LGALS3
0.98097	0.90184	0.88566	0.90446	0.65784	1.2385	0.47201	1.0646	0.75947	0.9433	0.8632	0.90456	0.76256	0.79345				26	26	26	62.2	62.2	62.2	49.203	0	222850000000	118780000000	104070000000	20	18	18	16	19	20	18	16	16	15	16	15	15	15	P17980	P17980	26S protease regulatory subunit 6A	PSMC3
0.97896	0.97929	0.99748	0.9842	0.75459	1.34	0.60058	0.98298	0.78734	0.86578	0.84885	0.9343	0.84578	0.75293				38	38	38	71.4	71.4	71.4	60.343	0	1672300000000	879930000000	792370000000	33	32	33	31	31	31	31	27	27	29	25	26	28	27	P17987	P17987	T-complex protein 1 subunit alpha	TCP1
0.94989	0.85994	0.93938	0.78632	0.70023	1.2385	0.55623	0.93422	0.72658	0.96339	0.85624	1.218	0.80385	0.80466				18	18	18	52.9	52.9	52.9	49.966	0	26103000000	15463000000	10640000000	10	9	10	10	10	10	11	7	7	4	8	8	7	4	P18031	P18031	Tyrosine-protein phosphatase non-receptor type 1	PTPN1
NaN	NaN	NaN	NaN	0.91943	NaN	NaN	0.78281	0.55811	0.52779	0.93663	0.83649	NaN	0.72801				5	5	5	9.9	9.9	9.9	86.908	0	2037100000	1181900000	855170000	0	0	1	0	2	0	1	4	4	2	4	4	3	3	P18074;P18074-2	P18074;P18074-2	TFIIH basal transcription factor complex helicase XPD subunit	ERCC2
1.019	0.79356	0.88526	0.91784	0.70037	1.1006	0.52757	0.99349	0.74263	0.86832	0.90473	0.8328	0.69099	0.76999				13	13	13	70	70	70	12.538	0	536680000000	287780000000	248900000000	9	9	10	9	9	10	9	10	8	8	9	10	8	9	P18077	P18077	60S ribosomal protein L35a	RPL35A
0.9909	0.99725	0.91618	0.76644	0.68953	1.3026	0.51163	1.1066	0.63987	0.80403	0.77573	0.76035	0.76246	0.66016				15	15	15	26.9	26.9	26.9	88.053	0	18706000000	11063000000	7642700000	8	9	7	9	7	8	8	6	6	7	8	7	5	8	P18084	P18084	Integrin beta-5	ITGB5
1.0011	0.87419	0.96818	0.88167	0.79038	1.4326	0.48868	0.9713	0.64815	0.79296	0.74753	0.77602	0.67873	0.66211				9	7	7	56.1	38.9	38.9	20.511	0	242050000000	122480000000	119570000000	6	6	7	7	8	7	7	7	7	7	8	8	8	8	P18085	P18085	ADP-ribosylation factor 4	ARF4
1.0176	0.93491	0.90283	0.93509	0.68616	1.2849	0.62248	1.0052	0.71992	0.8236	0.82631	0.84501	0.80593	0.74663				23	23	23	69.4	69.4	69.4	29.225	0	1879000000000	996220000000	882770000000	16	16	16	17	16	15	17	12	13	13	13	14	11	13	P18124	P18124	60S ribosomal protein L7	RPL7
1.0279	0.97024	0.96781	0.95074	0.77328	1.3526	0.62585	1.0483	0.73345	0.81887	0.79556	0.83704	0.79993	0.7433				80	80	80	65.1	65.1	65.1	123.8	0	1822100000000	980250000000	841860000000	66	66	63	67	62	64	65	55	56	53	56	52	53	53	P18206;P18206-2;P18206-3	P18206;P18206-2	Vinculin	VCL
NaN	NaN	NaN	NaN	NaN	NaN	NaN	NaN	NaN	NaN	NaN	NaN	NaN	NaN				2	2	2	6.2	6.2	6.2	33.898	0.0039282	0	0	0	0	1	0	1	0	0	0	0	0	0	0	0	0	0	P18440	P18440	Arylamine N-acetyltransferase 1	NAT1
1.0007	0.91611	0.85305	0.83425	0.72175	1.1284	0.46305	0.96073	0.64315	0.82483	0.76435	0.74953	0.86712	0.66255				28	28	6	16.2	16.2	3.1	263.83	0	48954000000	27715000000	21239000000	17	19	16	18	18	17	17	18	11	16	16	16	15	17	P18583;P18583-5;P18583-7;P18583-9;P18583-2;P18583-10;P18583-4;P18583-3;P18583-8	P18583;P18583-5;P18583-7;P18583-9;P18583-2;P18583-10;P18583-4;P18583-3	Protein SON	SON
0.95786	1.0303	1.0634	0.99484	0.78053	1.2728	0.63649	NaN	0.9648	1.169	1.1897	NaN	1.3304	NaN				8	8	8	28.7	28.7	28.7	43.239	0	9165300000	4885800000	4279500000	6	8	8	8	7	7	7	4	3	3	4	4	5	3	P18615;P18615-3;P18615-4	P18615;P18615-3;P18615-4	Negative elongation factor E	NELFE
0.99254	0.92752	0.88117	0.83768	0.7284	1.3495	0.59812	1.008	0.72778	0.88592	0.89877	0.85203	0.82546	0.81878				12	12	12	58.7	58.7	58.7	21.397	0	1115300000000	577430000000	537880000000	10	10	10	10	11	10	10	9	9	10	10	10	10	10	P18621;P18621-3;P18621-2	P18621;P18621-3;P18621-2	60S ribosomal protein L17	RPL17
0.98336	0.96645	1.016	0.98292	0.81506	1.3718	0.61594	1.0464	0.72303	0.8028	0.78652	0.83668	0.76372	0.73499				16	16	10	57.9	57.9	37	28.804	0	1292900000000	688930000000	603980000000	12	13	12	12	13	13	14	10	11	10	10	11	11	11	P18669;P15259	P18669	Phosphoglycerate mutase 1	PGAM1
1.0203	0.84739	1.0089	1.0164	0.70951	1.3685	0.75405	0.99501	0.92424	1.109	1.0159	1.0716	0.86297	0.91639				19	19	19	62.9	62.9	62.9	44.969	0	118600000000	63541000000	55059000000	13	14	14	13	14	11	14	9	12	14	13	10	10	12	P18754;P18754-2	P18754;P18754-2	Regulator of chromosome condensation	RCC1
NaN	NaN	NaN	0.79986	0.83288	NaN	NaN	NaN	NaN	NaN	NaN	NaN	NaN	NaN				2	2	2	11.9	11.9	11.9	32.461	0	474660000	238450000	236200000	1	2	1	1	2	2	1	0	0	0	0	0	0	0	P18827	P18827	Syndecan-1	SDC1
NaN	NaN	NaN	NaN	NaN	NaN	NaN	NaN	NaN	NaN	NaN	NaN	NaN	NaN				3	1	1	15.5	9.6	9.6	29.232	0	0	0	0	1	1	1	2	2	2	2	2	2	2	2	2	2	2	P18846;P18846-2;Q03060-6;Q03060-23;Q03060-9;Q03060-24;Q03060-8;Q03060-32;Q03060-26;Q03060-21;Q03060-31	P18846;P18846-2;Q03060-6;Q03060-23;Q03060-9;Q03060-24;Q03060-8;Q03060-32;Q03060-26;Q03060-21;Q03060-31	Cyclic AMP-dependent transcription factor ATF-1	ATF1
0.93987	0.90963	0.95817	1.0423	0.73364	1.3278	0.56005	1.0194	0.64809	0.78352	0.78349	0.86976	0.68276	0.65024				26	26	26	32.5	32.5	32.5	101.73	0	43056000000	23557000000	19499000000	15	17	18	14	14	11	14	18	15	16	14	13	13	17	P18858;P18858-3;P18858-2	P18858;P18858-3;P18858-2	DNA ligase 1	LIG1
0.92967	0.68182	0.72229	0.73935	0.56773	0.96735	0.44006	0.9255	0.57155	0.7852	0.74904	0.72453	0.72829	0.65488				7	7	7	52.8	52.8	52.8	12.587	0	149380000000	87088000000	62294000000	5	6	5	6	5	5	5	6	5	5	6	5	5	5	P18859;P18859-2	P18859;P18859-2	ATP synthase-coupling factor 6, mitochondrial	ATP5J
0.92356	0.90279	0.92849	0.88392	0.82755	1.574	0.62554	0.81635	0.66093	0.84812	0.74214	0.83122	0.77316	0.65674				18	18	18	37	37	37	69.476	0	20480000000	10764000000	9715700000	5	10	11	10	7	10	8	7	6	9	9	9	8	8	P18887	P18887	DNA repair protein XRCC1	XRCC1
1.0701	0.9515	1.0081	0.95167	0.78705	1.1852	0.47932	1.0065	0.77466	0.69346	0.81816	0.65994	0.75989	0.70279				16	16	16	15.1	15.1	15.1	148.53	0	18037000000	9650400000	8386600000	5	8	6	7	4	4	5	9	7	5	6	5	5	6	P19174;P19174-2	P19174;P19174-2	1-phosphatidylinositol 4,5-bisphosphate phosphodiesterase gamma-1	PLCG1
1.1118	1.0758	1.1032	0.96731	0.86618	NaN	0.63052	1.129	0.59408	0.87144	0.72312	0.71327	0.73129	0.73571				4	4	4	15.7	15.7	15.7	27.96	0	13575000000	6938500000	6636400000	3	3	3	2	2	3	2	2	2	1	1	1	2	1	P19256-3;P19256;P19256-2	P19256-3;P19256;P19256-2	Lymphocyte function-associated antigen 3	CD58
1.0151	0.95362	0.95549	0.96108	0.75657	1.3812	0.61656	1.0329	0.73043	0.8242	0.83745	0.85277	0.8336	0.79517				29	29	29	32.8	32.8	32.8	76.613	0	2816300000000	1469400000000	1346900000000	26	27	25	27	26	25	27	22	21	23	22	24	20	22	P19338	P19338	Nucleolin	NCL
NaN	NaN	NaN	NaN	NaN	NaN	NaN	NaN	NaN	NaN	NaN	NaN	NaN	NaN				4	4	4	22.9	22.9	22.9	31.441	0	954510000	417290000	537220000	1	3	1	1	1	1	1	1	1	0	1	1	0	0	P19387	P19387	DNA-directed RNA polymerase II subunit RPB3	POLR2C
1.1316	0.89659	0.84863	0.99218	0.84678	1.3736	0.63184	1.0054	0.77615	0.80344	0.92125	NaN	0.88461	0.75854				9	9	9	41.4	41.4	41.4	24.551	0	30257000000	15300000000	14957000000	6	6	7	6	7	6	5	5	3	2	3	1	3	4	P19388	P19388	DNA-directed RNA polymerases I, II, and III subunit RPABC1	POLR2E
1.0257	0.87054	0.88551	0.80501	0.58894	0.99007	0.49387	0.98456	0.54225	0.75371	0.72832	0.79207	0.63646	0.76886				8	8	8	42.2	42.2	42.2	27.391	0	30768000000	17709000000	13059000000	7	7	7	7	6	7	5	6	6	6	7	7	6	4	P19404	P19404	NADH dehydrogenase [ubiquinone] flavoprotein 2, mitochondrial	NDUFV2
NaN	NaN	1.9592	NaN	NaN	NaN	NaN	NaN	NaN	NaN	NaN	0.81179	NaN	NaN				4	4	4	8.1	8.1	8.1	89.277	0	695600000	420790000	274810000	0	1	1	2	1	1	1	1	1	2	1	3	2	2	P19447	P19447	TFIIH basal transcription factor complex helicase XPB subunit	ERCC3
0.95702	0.97966	0.96068	0.81988	0.65465	1.1441	0.81121	1.0666	0.69718	0.81643	0.77276	0.81556	0.76751	0.74254				16	16	16	32.3	32.3	32.3	62.094	0	45981000000	27396000000	18585000000	10	11	10	12	11	9	12	8	10	10	11	9	10	9	P19525;P19525-2	P19525;P19525-2	Interferon-induced, double-stranded RNA-activated protein kinase	EIF2AK2
1.0539	1.0171	1.0222	0.91298	0.70388	1.3497	0.62832	1.0402	0.752	0.76094	0.79547	0.77249	0.73594	0.68443				14	14	14	54.6	54.6	54.6	33.824	0	116100000000	61219000000	54882000000	10	11	11	11	11	11	10	9	10	10	9	9	10	9	P19623	P19623	Spermidine synthase	SRM
1.0952	0.92114	0.94357	0.94891	0.74729	1.4455	0.57286	1.0538	0.76269	0.8014	0.89016	0.8769	0.73873	0.77674				13	13	13	46.6	46.6	46.6	41.213	0	47801000000	25833000000	21968000000	7	8	9	8	7	8	9	9	8	8	7	8	8	9	P19784	P19784	Casein kinase II subunit alpha	CSNK2A2
0.86991	0.80533	NaN	0.81813	0.69283	NaN	0.56634	1.1013	0.72209	0.86968	NaN	1.0146	1.0866	0.90681				8	8	8	11.3	11.3	11.3	105.35	0	12345000000	6340200000	6004400000	3	3	2	2	4	3	4	2	2	2	1	1	1	2	P19838;P19838-2;P19838-3	P19838;P19838-2	Nuclear factor NF-kappa-B p105 subunit;Nuclear factor NF-kappa-B p50 subunit	NFKB1
1.0198	0.92782	0.88431	0.99472	0.72928	1.2491	0.44267	0.98582	0.73503	0.8109	0.96226	0.96662	0.87487	0.8004				11	11	11	25.9	25.9	25.9	49.955	0	15582000000	8105300000	7476300000	3	6	7	6	5	4	3	6	6	5	6	6	4	4	P19971;P19971-2	P19971;P19971-2	Thymidine phosphorylase	TYMP
1.0109	0.92226	0.93842	0.88725	0.77029	1.3477	0.62844	0.93263	0.71036	0.84481	0.90622	0.91283	0.76121	0.91528				32	32	18	34.3	34.3	20.7	130.62	0	111940000000	59187000000	52753000000	17	22	20	20	19	20	22	19	19	19	17	18	14	19	P20020-6;P20020-3;P20020;P20020-4;P20020-5;P20020-2	P20020-6;P20020-3;P20020;P20020-4;P20020-5;P20020-2	Plasma membrane calcium-transporting ATPase 1	ATP2B1
1.0175	0.94697	0.92562	0.92429	0.69949	1.3959	0.62389	1.0522	0.70159	0.80055	0.8735	0.81543	0.78876	0.78139				30	30	30	74.8	74.8	74.8	38.388	0	361600000000	194800000000	166800000000	20	23	22	23	22	23	20	19	20	16	19	18	19	17	P20042	P20042	Eukaryotic translation initiation factor 2 subunit 2	EIF2S2
0.97423	1.0443	1.2253	0.89915	0.85104	1.4537	0.68613	0.97439	0.76295	0.90982	0.93723	0.84099	0.86351	0.8579				19	19	19	42.2	42.2	42.2	52.739	0	84032000000	42581000000	41451000000	14	14	14	14	14	13	12	10	8	10	10	10	10	10	P20073;P20073-2	P20073;P20073-2	Annexin A7	ANXA7
1.0049	0.96664	0.95324	0.93186	0.79132	1.3403	0.63703	1.0054	0.72632	0.85456	0.80457	0.89518	0.77282	0.76231				11	11	10	61.2	61.2	56.3	22.168	0	360590000000	187480000000	173110000000	9	10	9	8	8	9	9	7	9	7	8	7	6	9	P20290;P20290-2	P20290;P20290-2	Transcription factor BTF3	BTF3
NaN	NaN	NaN	NaN	NaN	NaN	NaN	NaN	NaN	NaN	NaN	NaN	NaN	NaN				3	2	2	14.1	10.5	10.5	24.984	0.0020928	1417800000	728240000	689520000	2	2	2	2	2	3	2	2	1	1	2	2	2	2	P20336;O95716	P20336;O95716	Ras-related protein Rab-3A;Ras-related protein Rab-3D	RAB3A;RAB3D
0.95046	0.76084	0.94987	0.80153	0.67315	1.2469	0.45048	1.0803	0.56101	0.93736	0.91805	0.97687	NaN	0.7489				8	8	8	39.9	39.9	39.9	24.389	0	16960000000	9809500000	7150300000	5	4	5	5	5	3	4	6	4	4	3	3	4	5	P20338	P20338	Ras-related protein Rab-4A	RAB4A
1.2422	1.2543	1.1585	NaN	0.6916	1.4851	0.75806	0.9473	0.64595	0.88125	0.8959	0.67899	0.81617	0.81063				8	4	4	51.6	32.6	32.6	23.658	0	12331000000	6297000000	6034400000	5	6	5	5	5	6	6	5	5	6	6	5	6	6	P20339;P20339-2	P20339;P20339-2	Ras-related protein Rab-5A	RAB5A
1.0552	1.1028	1.1091	0.92025	0.87818	1.5263	0.62779	0.97473	0.61993	0.73497	0.76251	0.78002	0.6836	0.70259				13	13	13	62.5	62.5	62.5	23.548	0	189950000000	99812000000	90142000000	8	8	10	9	10	7	8	7	9	10	9	9	9	10	P20340-2;P20340;P20340-4;Q9NRW1;P20340-3;Q9NRW1-2;Q9H0N0;Q14964	P20340-2;P20340;P20340-4;Q9NRW1	Ras-related protein Rab-6A;Ras-related protein Rab-6B	RAB6A;RAB6B
0.8446	1.0623	0.83149	0.66622	1.1772	1.6204	0.8314	NaN	0.4812	0.72094	0.52244	0.72737	0.78822	0.68604				16	16	16	17.3	17.3	17.3	127.41	0	5847300000	3181800000	2665500000	5	4	6	6	6	4	3	3	3	5	4	4	6	7	P20585	P20585	DNA mismatch repair protein Msh3	MSH3
0.98499	1.0183	1.055	0.99315	0.82834	1.4038	0.77926	1.0789	0.81717	0.86868	0.87124	0.83707	0.81406	0.81685				12	12	12	46.5	46.5	46.5	26.489	0	314330000000	163540000000	150790000000	11	12	12	11	11	11	12	9	9	8	8	8	8	9	P20618	P20618	Proteasome subunit beta type-1	PSMB1
1.1537	1.0227	1.1288	0.98422	0.77402	1.457	0.63962	1.018	0.69204	0.85008	0.83522	0.87	0.74862	0.73086				7	7	7	22.4	22.4	22.4	30.993	0	37506000000	20519000000	16986000000	3	5	2	2	4	3	5	5	4	3	4	3	3	4	P20645	P20645	Cation-dependent mannose-6-phosphate receptor	M6PR
NaN	NaN	1.1447	NaN	NaN	NaN	NaN	NaN	NaN	NaN	NaN	NaN	NaN	NaN	+			7	3	3	6.7	3.2	3.2	114.12	1	1535800000	767310000	768470000	4	3	5	4	4	3	5	3	3	3	3	3	3	4	P20648	P20648	Potassium-transporting ATPase alpha chain 1	ATP4A
1.0574	0.85191	0.90048	0.8006	0.65581	1.2173	0.49337	0.97595	0.63843	0.80132	0.77455	0.80294	0.74085	0.69244				7	7	7	34.7	34.7	34.7	16.762	0	391920000000	218150000000	173770000000	7	7	7	7	7	7	7	6	6	6	6	6	6	7	P20674	P20674	Cytochrome c oxidase subunit 5A, mitochondrial	COX5A
1.0085	0.89734	0.8842	0.92261	0.74267	1.2723	0.54541	1.0146	0.68302	0.8018	0.79964	0.77799	0.76187	0.73839				52	51	48	73.4	73.4	70.3	66.408	0	936030000000	494640000000	441390000000	40	42	38	42	42	37	41	35	33	34	37	35	34	33	P20700	P20700	Lamin-B1	LMNB1
0.99555	0.9633	0.96152	0.96974	0.79395	1.3812	0.66185	1.0581	0.72259	0.8639	0.83567	0.82794	0.78337	0.7758				31	31	31	52.4	52.4	52.4	80.264	0	215040000000	131330000000	83708000000	22	22	22	22	22	24	21	17	21	21	20	20	18	20	P20810-9;P20810-10;P20810-7;P20810-6;P20810-5;P20810;P20810-4;P20810-8;P20810-2;P20810-3	P20810-9;P20810-10;P20810-7;P20810-6;P20810-5;P20810;P20810-4;P20810-8;P20810-2;P20810-3	Calpastatin	CAST
0.89822	0.84326	0.84709	0.88403	0.72208	1.184	0.63668	1.0143	0.66973	0.77202	0.83078	0.83247	0.69728	0.84231				18	16	16	38.7	35.4	35.4	55.405	0	58690000000	34419000000	24271000000	14	13	16	14	14	14	15	12	11	12	11	12	11	11	P20839;P20839-3;P20839-7;P20839-5;P20839-6;P20839-2;P20839-4	P20839;P20839-3;P20839-7;P20839-5;P20839-6;P20839-2;P20839-4	Inosine-5-monophosphate dehydrogenase 1	IMPDH1
NaN	NaN	NaN	NaN	NaN	NaN	NaN	NaN	NaN	NaN	NaN	NaN	NaN	NaN				4	4	4	19.9	19.9	19.9	28.286	0	517890000	229920000	287970000	1	3	1	2	0	0	1	0	0	0	0	1	1	0	P20851-2;P20851	P20851-2;P20851	C4b-binding protein beta chain	C4BPB
NaN	NaN	NaN	NaN	NaN	NaN	NaN	NaN	0.77528	NaN	0.94995	NaN	0.73423	0.74448				7	7	7	6.3	6.3	6.3	183.56	0	3237100000	1981800000	1255300000	0	1	0	2	0	0	1	2	3	1	2	1	2	3	P20908	P20908	Collagen alpha-1(V) chain	COL5A1
NaN	NaN	NaN	NaN	NaN	NaN	NaN	NaN	NaN	NaN	NaN	NaN	NaN	NaN				2	2	2	9.5	9.5	9.5	37.208	0	1378400000	755680000	622680000	0	0	0	1	1	0	1	1	1	2	1	0	1	1	P20933	P20933	N(4)-(beta-N-acetylglucosaminyl)-L-asparaginase;Glycosylasparaginase alpha chain;Glycosylasparaginase beta chain	AGA
NaN	NaN	NaN	NaN	NaN	NaN	NaN	NaN	NaN	NaN	NaN	NaN	NaN	NaN				6	6	6	8.3	8.3	8.3	116.4	0	383720000	285620000	98097000	0	1	2	0	1	0	0	0	2	0	0	2	1	3	P20936;P20936-2;P20936-4;P20936-3	P20936;P20936-2;P20936-4	Ras GTPase-activating protein 1	RASA1
NaN	0.83608	0.87055	0.85923	0.73022	1.172	0.72155	NaN	0.7741	0.91362	0.88799	0.9256	NaN	0.89354				1	1	1	10.8	10.8	10.8	11.53	0	30096000000	13976000000	16120000000	1	1	1	1	1	1	1	1	1	1	1	1	1	1	P20962	P20962	Parathymosin	PTMS
0.96377	0.96404	0.95864	1.1689	0.6643	1.3682	0.73619	0.95031	0.69138	0.77867	0.85352	0.83815	0.80588	0.78021				14	14	14	19.2	19.2	19.2	92.706	0	22466000000	12915000000	9551400000	5	5	6	4	4	5	6	5	7	9	7	10	7	8	P21127;P21127-8;P21127-3;P21127-2;Q9UQ88;P21127-12;P21127-4;P21127-5;P21127-10;P21127-6;P21127-9;Q9UQ88-4;Q9UQ88-3;Q9UQ88-2;Q9UQ88-5;Q9UQ88-10;Q9UQ88-9;Q9UQ88-8	P21127;P21127-8;P21127-3;P21127-2;Q9UQ88;P21127-12;P21127-4;P21127-5;P21127-10;P21127-6;P21127-9;Q9UQ88-4;Q9UQ88-3;Q9UQ88-2;Q9UQ88-5;Q9UQ88-10;Q9UQ88-9	Cyclin-dependent kinase 11B;Cyclin-dependent kinase 11A	CDK11B;CDK11A
1.0071	0.95994	0.92435	0.98038	0.71706	1.2952	0.70705	1.0674	0.68301	0.87984	0.89661	0.90236	0.75671	0.78001				19	19	17	74.7	74.7	67.6	26.559	0	448230000000	262030000000	186190000000	17	16	16	16	15	16	16	16	14	15	15	13	15	17	P21266	P21266	Glutathione S-transferase Mu 3	GSTM3
1.0471	0.96528	0.93545	1.001	0.85526	1.4613	0.7827	0.97902	0.79782	0.86499	0.91962	0.92049	0.85811	0.79522				16	16	16	41.5	41.5	41.5	56.5	0	76562000000	38881000000	37680000000	8	8	8	8	8	9	8	11	10	9	11	10	8	11	P21281;P15313	P21281	V-type proton ATPase subunit B, brain isoform	ATP6V1B2
0.98498	0.96674	0.87779	0.96884	0.71067	1.4222	0.56595	0.99323	0.66566	0.77222	0.75557	0.79009	0.71829	0.79282				19	19	19	43.5	43.5	43.5	43.941	0	39374000000	21540000000	17834000000	13	11	10	9	10	13	13	8	10	9	10	9	9	12	P21283;Q8NEY4;Q8NEY4-2	P21283	V-type proton ATPase subunit C 1	ATP6V1C1
1.0264	1.01	0.97199	1.0245	0.75096	1.3887	0.80072	1.0192	0.85021	0.94358	0.85876	0.86052	0.90344	1.0686				12	12	12	68.9	68.9	68.9	20.567	0	591550000000	315900000000	275650000000	9	9	9	9	9	9	9	9	9	9	9	9	9	9	P21291	P21291	Cysteine and glycine-rich protein 1	CSRP1
0.99977	0.9277	0.9589	0.97231	0.76033	1.3032	0.63445	1.0075	0.74	0.83777	0.83238	0.85872	0.78627	0.75062				162	162	149	68	68	64.3	280.74	0	6695700000000	3560900000000	3134700000000	138	135	140	139	143	140	140	120	120	118	121	118	121	120	P21333;P21333-2	P21333;P21333-2	Filamin-A	FLNA
1.6675	1.0287	1.2585	NaN	1.1333	NaN	0.61532	1.5133	0.62817	0.80363	0.95267	NaN	0.51995	0.67421				13	13	13	5.5	5.5	5.5	319.37	0	6942700000	1693600000	5249100000	5	4	3	2	4	2	3	6	5	3	3	2	2	2	P21359;P21359-2;P21359-6;P21359-4;P21359-3;P21359-5	P21359;P21359-2;P21359-6	Neurofibromin;Neurofibromin truncated	NF1
1.0353	0.98515	0.96435	0.96102	0.73021	1.3465	0.60076	1.0408	0.78465	0.80875	0.79388	0.85358	0.81243	0.74183				30	30	29	38.5	38.5	37.3	98.398	0	142160000000	79143000000	63016000000	18	17	18	18	18	23	19	20	19	20	17	19	17	17	P21399;O00408;O00408-5;O00408-4;O00408-3	P21399	Cytoplasmic aconitate hydratase	ACO1
NaN	NaN	0.96659	NaN	NaN	NaN	NaN	NaN	NaN	NaN	NaN	NaN	NaN	NaN				4	4	4	16.5	16.5	16.5	30.898	0	1320300000	761580000	558670000	2	1	1	1	0	0	1	3	1	1	1	3	1	2	P21583;P21583-3;P21583-2	P21583;P21583-3;P21583-2	Kit ligand;Soluble KIT ligand	KITLG
1.0064	0.85059	0.8961	0.8141	0.678	1.2473	0.58019	1.0051	0.66859	0.83866	0.89079	0.8252	0.94045	0.79479				24	24	24	80.6	80.6	80.6	30.772	0	1635300000000	890770000000	744550000000	21	20	20	21	19	21	21	19	19	19	19	19	18	18	P21796	P21796	Voltage-dependent anion-selective channel protein 1	VDAC1
0.99854	0.94723	0.80637	0.78582	0.66943	1.3803	0.47671	1.0379	0.61135	0.78385	0.76312	0.7648	0.74494	0.65219				12	12	12	48.6	48.6	48.6	31.629	0	51657000000	26646000000	25011000000	8	7	5	7	8	6	6	8	8	9	9	8	9	9	P21912	P21912	Succinate dehydrogenase [ubiquinone] iron-sulfur subunit, mitochondrial	SDHB
0.90226	0.827	0.81783	0.78021	0.58574	1.3566	0.58199	0.93905	0.61055	0.73611	0.71511	0.65142	0.74804	0.65522				4	4	4	11.4	11.4	11.4	25.416	0	44931000000	24854000000	20077000000	2	4	3	2	3	4	3	2	2	2	2	2	2	2	P21926	P21926	CD9 antigen	CD9
0.87711	0.79136	0.80642	NaN	0.54934	1.2547	0.48575	0.96821	0.63266	NaN	0.81309	0.70713	NaN	NaN				5	5	5	14	14	14	43.122	0	6833600000	3558800000	3274800000	3	3	2	1	2	2	4	2	3	1	3	2	1	1	P21953;P21953-2	P21953	2-oxoisovalerate dehydrogenase subunit beta, mitochondrial	BCKDHB
0.96258	0.98745	1.0846	0.82942	0.80303	1.4881	0.78574	1.0097	0.78184	1.005	1.0164	0.88267	0.95309	0.88091				15	15	15	71.2	71.2	71.2	30.037	0	111000000000	56259000000	54744000000	11	13	10	12	11	10	11	10	10	11	12	14	10	11	P21964;P21964-2	P21964;P21964-2	Catechol O-methyltransferase	COMT
0.86674	0.73559	0.70087	0.72389	0.47663	1.0196	0.4472	0.97297	0.61685	0.68032	0.74384	0.7136	0.72015	0.63783				14	14	14	24.5	24.5	24.5	83.134	0	11810000000	7432700000	4377100000	6	6	5	5	5	4	8	8	11	9	7	8	7	9	P22033	P22033	Methylmalonyl-CoA mutase, mitochondrial	MUT
0.96013	0.96493	0.9783	1.0184	0.77149	1.3916	0.70675	0.90538	0.71035	0.82366	0.90585	0.90966	0.83118	0.70346				22	22	22	33.2	33.2	33.2	89.42	0	77489000000	41988000000	35502000000	16	15	16	17	19	11	20	13	12	9	14	14	11	13	P22059;Q969R2;Q969R2-6;Q969R2-3;Q969R2-2	P22059	Oxysterol-binding protein 1	OSBP
1.0524	0.77473	0.92577	0.90551	0.75596	1.2078	0.55953	0.95989	0.67229	0.89874	0.86884	0.89575	0.91081	0.82483				12	12	12	62.6	62.6	62.6	24.636	0	62186000000	34508000000	27678000000	7	9	7	7	7	9	7	5	6	6	6	6	7	6	P22061;P22061-2	P22061;P22061-2	Protein-L-isoaspartate(D-aspartate) O-methyltransferase	PCMT1
0.95727	0.95833	0.99001	0.93877	0.74023	1.2281	0.79529	0.97031	0.65287	0.94012	0.8927	1.0415	0.80288	0.71734				12	12	10	44.5	44.5	36.4	33.784	0	224590000000	122280000000	102310000000	9	9	11	10	9	8	9	9	10	9	10	10	9	10	P22087	P22087	rRNA 2-O-methyltransferase fibrillarin	FBL
0.99156	0.9318	0.98364	0.93987	0.7209	1.263	0.63467	1.009	0.73714	0.82521	0.81404	0.85899	0.75173	0.73047				42	42	42	45.2	45.2	45.2	107.77	0	905740000000	485290000000	420450000000	34	34	35	34	34	35	35	32	32	33	31	33	32	32	P22102;P22102-2	P22102;P22102-2	Trifunctional purine biosynthetic protein adenosine-3;Phosphoribosylamine--glycine ligase;Phosphoribosylformylglycinamidine cyclo-ligase;Phosphoribosylglycinamide formyltransferase	GART
0.98438	1.0299	0.9803	1.0345	0.79344	1.3432	0.6034	1.0075	0.73273	0.81694	0.80259	0.85832	0.78824	0.73055				24	24	24	52.2	52.2	52.2	47.079	0	652380000000	338000000000	314390000000	20	19	19	20	19	20	18	16	15	14	14	15	17	16	P22234;P22234-2	P22234;P22234-2	Multifunctional protein ADE2;Phosphoribosylaminoimidazole-succinocarboxamide synthase;Phosphoribosylaminoimidazole carboxylase	PAICS
1.056	0.90656	0.87296	0.88284	0.6469	1.2611	0.44591	1.0534	0.67587	0.78725	0.74724	0.75612	0.73026	0.65818				16	16	16	38.4	38.4	38.4	58.993	0	175310000000	98270000000	77037000000	14	12	14	14	14	11	11	12	11	11	13	13	10	11	P22307;P22307-8;P22307-7;P22307-4;P22307-2;P22307-3;P22307-6;P22307-5	P22307;P22307-8;P22307-7;P22307-4	Non-specific lipid-transfer protein	SCP2
0.98756	0.98837	0.99196	0.93933	0.7325	1.3621	0.59783	1.0413	0.73731	0.85879	0.84348	0.8536	0.77912	0.75957				50	50	50	53.7	53.7	53.7	117.85	0	1396100000000	726070000000	669990000000	34	33	31	34	33	34	32	36	35	34	37	36	34	37	P22314;P22314-2	P22314;P22314-2	Ubiquitin-like modifier-activating enzyme 1	UBA1
NaN	NaN	NaN	NaN	NaN	NaN	NaN	NaN	NaN	NaN	NaN	NaN	NaN	NaN				16	1	1	75.7	11.2	11.2	17.298	0.0013514	169460000	169460000	0	11	12	12	13	12	11	12	12	11	11	11	11	13	10	P22392	P22392	Nucleoside diphosphate kinase B	NME2
1.0242	0.92448	0.94626	0.96452	0.72152	1.2956	0.56211	1.0377	0.70892	0.78811	0.78595	0.84078	0.76837	0.73224				21	21	0	74.5	74.5	0	30.137	0	4034400000000	2157900000000	1876500000000	14	16	16	15	16	14	16	14	13	13	14	13	15	12	P22392-2	P22392-2	Nucleoside diphosphate kinase B	NME2
NaN	NaN	NaN	NaN	NaN	NaN	NaN	0.72267	0.58874	0.73103	0.73325	0.60727	0.60483	0.58199				2	2	1	9.4	9.4	6.1	33.538	0	2857000000	1627100000	1229900000	1	0	1	1	1	0	0	2	1	2	1	1	1	1	P22415;P22415-2	P22415;P22415-2	Upstream stimulatory factor 1	USF1
0.97663	0.92323	0.99863	0.88525	0.74721	1.1962	0.501	1.333	NaN	0.92787	1.1759	0.89069	1.1027	0.86646				14	14	14	33.6	33.6	33.6	53.836	0	21339000000	11562000000	9777000000	6	7	8	9	8	7	8	4	3	4	3	6	3	5	P22570;P22570-7;P22570-3;P22570-4;P22570-6;P22570-5;P22570-2	P22570;P22570-7;P22570-3;P22570-4;P22570-6;P22570-5;P22570-2	NADPH:adrenodoxin oxidoreductase, mitochondrial	FDXR
0.98186	0.91517	0.9636	0.9143	0.78889	1.3147	0.69712	0.9856	0.76548	0.92869	0.88873	0.9576	0.8858	0.81863				32	32	31	75.9	75.9	75.9	37.429	0	4439900000000	2379900000000	2060000000000	26	28	28	29	27	30	26	28	27	26	27	27	27	27	P22626;P22626-2	P22626;P22626-2	Heterogeneous nuclear ribonucleoproteins A2/B1	HNRNPA2B1
1.022	0.94648	0.99547	0.77586	0.91344	1.2845	0.63827	1.056	0.8687	1.0395	0.88946	0.87671	0.80533	0.87883				10	10	9	13	13	11.7	104.76	0	7525300000	3990200000	3535200000	5	5	6	3	7	6	6	4	5	4	6	4	4	5	P22670;P48378;P48380;P48378-2	P22670	MHC class II regulatory factor RFX1	RFX1
NaN	NaN	NaN	NaN	NaN	NaN	NaN	NaN	NaN	NaN	NaN	NaN	NaN	NaN				6	6	6	10	10	10	99.632	0	638080000	421450000	216630000	1	1	1	2	1	0	2	1	2	2	1	2	0	1	P22681	P22681	E3 ubiquitin-protein ligase CBL	CBL
1.0614	0.94848	0.91135	0.85626	0.75624	1.3301	0.72737	1.0017	0.56713	0.73921	0.73243	0.70883	0.69187	0.63835				8	8	2	31.1	31.1	11.7	40.622	0	39961000000	21872000000	18089000000	5	4	5	4	5	3	3	4	8	3	4	4	4	3	P22694;P22694-2;P22694-4;P22694-3;P22694-5;P22694-7;P22694-6;P22694-9;P22694-10;P22694-8	P22694;P22694-2;P22694-4;P22694-3;P22694-5;P22694-7;P22694-6;P22694-9;P22694-10;P22694-8	cAMP-dependent protein kinase catalytic subunit beta	PRKACB
1.0154	0.89235	0.89733	0.83472	0.71172	1.2889	0.52665	1.0466	0.67817	0.84823	0.84576	0.82206	0.79512	0.75033				22	22	22	53	53	53	48.442	0	459650000000	250680000000	208960000000	18	16	19	17	16	17	16	17	16	16	15	13	18	17	P22695	P22695	Cytochrome b-c1 complex subunit 2, mitochondrial	UQCRC2
0.87191	0.89553	0.98667	0.98225	0.74087	1.3599	0.48729	1.0467	0.79895	0.88143	0.977	0.80128	0.85622	0.8685				9	9	9	29.6	29.6	29.6	47.862	0	14257000000	7042100000	7215200000	7	6	6	5	5	7	4	4	3	3	3	3	3	4	P22830;P22830-2	P22830;P22830-2	Ferrochelatase, mitochondrial	FECH
1.027	1.0106	1.1367	1.0048	0.79592	1.3798	NaN	NaN	1.0403	NaN	0.9742	1.2593	0.82594	NaN				3	3	3	23.4	23.4	23.4	31.368	0	4533400000	2814900000	1718500000	3	3	3	3	3	2	1	2	3	2	3	2	2	2	P23025	P23025	DNA repair protein complementing XP-A cells	XPA
0.69477	NaN	0.9293	NaN	NaN	NaN	NaN	NaN	NaN	NaN	NaN	NaN	NaN	NaN				13	2	2	29.3	5	5	77.213	0	646840000	334180000	312660000	6	8	8	7	9	10	9	5	6	4	6	4	5	5	P23142;CON__ENSEMBL:ENSBTAP00000016046	P23142	Fibulin-1	FBLN1
0.9702	0.94624	0.93248	0.90985	0.72817	1.2567	0.57131	0.92245	0.76765	0.7667	0.82617	0.80832	0.84755	0.69802				16	16	5	33.1	33.1	8.1	74.433	0	20482000000	11446000000	9036300000	9	11	11	10	13	13	11	10	8	6	9	7	7	5	P23142-4;P23142-2;P23142-3	P23142-4;P23142-2;P23142-3	Fibulin-1	FBLN1
1.0555	0.97335	0.95532	0.92213	0.7684	1.414	0.61957	1.0319	0.75178	0.95314	0.79927	0.88629	0.79451	0.80123				16	16	14	52.8	52.8	45.2	33.969	0	120360000000	63061000000	57300000000	13	9	12	11	12	10	12	12	11	11	11	11	12	10	P23193;P23193-2	P23193;P23193-2	Transcription elongation factor A protein 1	TCEA1
NaN	NaN	NaN	NaN	NaN	NaN	NaN	NaN	NaN	NaN	NaN	NaN	NaN	NaN				4	4	4	5	5	5	126.6	0	1027800000	538270000	489570000	1	1	1	0	0	1	2	0	1	0	2	0	0	0	P23229;P23229-2;P23229-7;P23229-4;P23229-5;P23229-3;P23229-9;P23229-6	P23229;P23229-2;P23229-7;P23229-4;P23229-5;P23229-3;P23229-9;P23229-6	Integrin alpha-6;Integrin alpha-6 heavy chain;Integrin alpha-6 light chain	ITGA6
1.0083	0.96775	0.99324	0.94374	0.80824	1.416	0.61933	1.0314	0.75186	0.85462	0.85523	0.89363	0.76334	0.75259				41	41	39	47	47	47	76.149	0	1200000000000	623720000000	576240000000	30	31	31	33	31	30	32	24	24	24	25	24	25	24	P23246;P23246-2	P23246;P23246-2	Splicing factor, proline- and glutamine-rich	SFPQ
1.0256	0.95774	0.94184	1.0439	0.67867	1.3273	0.63689	1.0385	0.77094	0.87088	0.93097	0.98112	0.7738	0.82085				13	13	13	42.6	42.6	42.6	51.169	0	73119000000	40124000000	32995000000	10	10	11	11	11	11	11	10	11	10	10	9	9	7	P23258;Q9NRH3	P23258;Q9NRH3	Tubulin gamma-1 chain;Tubulin gamma-2 chain	TUBG1;TUBG2
1.0157	0.83572	0.83649	0.86722	0.63973	1.2247	0.52674	1.0307	0.67845	0.80771	0.77334	0.79106	0.77251	0.72315				15	15	15	60.2	60.2	60.2	23.742	0	2828100000000	1520900000000	1307200000000	13	12	13	11	11	13	13	14	13	13	13	14	13	13	P23284	P23284	Peptidyl-prolyl cis-trans isomerase B	PPIB
NaN	NaN	NaN	NaN	NaN	NaN	NaN	NaN	NaN	NaN	NaN	NaN	NaN	NaN				1	1	1	16	16	16	10.546	0.0017176	9372000	9372000	0	0	0	0	0	0	0	0	1	0	0	0	0	0	0	P23297	P23297	Protein S100-A1	S100A1
1.0467	0.97707	1.0379	0.94618	0.67232	1.0973	0.64644	0.94624	0.6478	0.82223	0.78222	0.78561	0.67533	0.69573				17	17	16	31.7	31.7	30.1	65.443	0	32897000000	17909000000	14988000000	7	6	9	7	10	8	10	9	11	10	9	9	11	11	P23368;P23368-2	P23368;P23368-2	NAD-dependent malic enzyme, mitochondrial	ME2
1.0389	0.89592	0.98728	0.93494	0.70773	1.3558	0.63403	1.0229	0.68385	0.87683	0.84401	0.85982	0.79969	0.73758				18	18	18	52	52	52	53.165	0	172830000000	93126000000	79703000000	11	13	12	13	14	12	12	17	15	15	15	16	15	15	P23381;P23381-2	P23381;P23381-2	Tryptophan--tRNA ligase, cytoplasmic;T1-TrpRS;T2-TrpRS	WARS
1.0115	0.98685	0.99485	0.99811	0.7783	1.4044	0.6635	1.02	0.74557	0.843	0.81927	0.87505	0.76415	0.7487				28	28	28	88.1	88.1	88.1	26.688	0	2730100000000	1419400000000	1310700000000	25	28	25	26	28	26	25	24	23	24	23	24	22	25	P23396;P23396-2	P23396;P23396-2	40S ribosomal protein S3	RPS3
1.0177	0.86352	0.83649	0.87896	0.59311	1.2378	0.42418	0.9974	0.62106	0.85599	0.79121	0.87244	0.72869	0.7191				2	2	2	17.3	17.3	17.3	18.884	0	71100000000	41242000000	29858000000	2	2	2	2	2	2	2	2	2	2	2	2	2	2	P23434	P23434	Glycine cleavage system H protein, mitochondrial	GCSH
NaN	NaN	NaN	NaN	NaN	NaN	NaN	NaN	NaN	NaN	NaN	NaN	NaN	NaN				4	4	4	4.2	4.2	4.2	133.28	0	892350000	588040000	304310000	1	1	1	1	0	1	0	2	0	1	1	0	1	0	P23458	P23458	Tyrosine-protein kinase JAK1	JAK1
NaN	NaN	NaN	NaN	NaN	NaN	NaN	NaN	NaN	NaN	NaN	NaN	NaN	NaN				6	3	3	6.5	3.8	3.8	100.42	0.00040024	274170000	88177000	185990000	3	4	5	3	3	2	3	2	1	2	1	2	1	2	P23497;P23497-4;P23497-2;P23497-7;P23497-6;P23497-5;P23497-3;Q9H930;Q9H930-1;Q9H930-2;Q9H930-3	P23497;P23497-4;P23497-2;P23497-7;P23497-6;P23497-5;P23497-3	Nuclear autoantigen Sp-100	SP100
NaN	NaN	NaN	NaN	NaN	NaN	NaN	NaN	NaN	NaN	NaN	NaN	NaN	NaN				2	2	2	11.5	11.5	11.5	36.876	0	186850000	107680000	79173000	1	1	1	0	0	0	1	0	0	0	0	1	0	0	P23511;P23511-2	P23511;P23511-2	Nuclear transcription factor Y subunit alpha	NFYA
0.9905	0.89072	0.8996	0.91754	0.70377	1.3696	0.59028	1.0123	0.66373	0.75912	0.77926	0.78567	0.72075	0.68426				26	26	26	51.9	51.9	51.9	47.716	0	987800000000	541520000000	446270000000	21	20	22	22	22	21	21	20	18	19	20	20	18	20	P23526;P23526-2	P23526;P23526-2	Adenosylhomocysteinase	AHCY
0.99079	0.89425	0.89665	0.87578	0.71263	1.3416	0.54633	0.99116	0.71094	0.82887	0.81687	0.85408	0.73929	0.76174				15	15	12	78.9	78.9	65.1	18.502	0	2933700000000	1539400000000	1394400000000	13	13	14	13	12	12	12	11	11	11	12	13	12	12	P23528	P23528	Cofilin-1	CFL1
0.97844	0.93022	0.96744	0.95554	0.7902	1.2941	0.56665	0.98132	0.73073	0.78009	0.8394	0.81946	0.8613	0.79997				33	33	33	47.8	47.8	47.8	69.15	0	809070000000	424880000000	384190000000	21	22	22	23	23	23	24	22	22	23	23	22	24	21	P23588;P23588-2	P23588;P23588-2	Eukaryotic translation initiation factor 4B	EIF4B
NaN	NaN	NaN	NaN	NaN	NaN	NaN	NaN	NaN	NaN	NaN	NaN	NaN	NaN				2	2	2	9.4	9.4	9.4	39.103	0	409820000	282010000	127810000	0	0	1	0	1	1	1	1	0	0	0	0	0	1	P23610	P23610	Factor VIII intron 22 protein	F8A1
1.0858	0.87613	NaN	0.93854	1.1314	1.2603	0.61049	NaN	0.63528	0.7614	0.77898	0.75225	0.64142	1.0041				26	14	11	24.8	13.5	11.5	137.92	0	10651000000	6150400000	4500800000	10	13	11	15	12	12	14	11	12	9	9	10	7	10	P23634;P23634-6;P23634-7;P23634-8;P23634-2;P23634-5;P23634-4;P23634-3	P23634;P23634-6;P23634-7;P23634-8;P23634-2;P23634-5;P23634-4;P23634-3	Plasma membrane calcium-transporting ATPase 4	ATP2B4
0.97401	0.8485	0.84106	0.84271	0.63649	1.1653	0.38832	1.0409	0.6457	0.76564	0.7779	0.79872	0.66	0.71352				15	15	15	28.6	28.6	28.6	73.776	0	31693000000	17924000000	13769000000	11	10	9	11	11	9	12	9	11	12	9	10	8	10	P23786	P23786	Carnitine O-palmitoyltransferase 2, mitochondrial	CPT2
1.0231	0.89836	0.95829	0.95232	0.7029	1.232	0.5428	1.0097	0.70743	0.85277	0.85981	0.94995	0.7369	0.73282				12	12	12	48.1	48.1	48.1	23.819	0	119040000000	62847000000	56195000000	9	10	10	9	11	10	10	10	9	10	8	9	9	10	P23919;P23919-2	P23919;P23919-2	Thymidylate kinase	DTYMK
1.0238	0.94945	0.92261	0.95915	0.73159	1.3534	0.59151	1.0154	0.71328	0.84422	0.79291	0.86123	0.7519	0.70992				36	36	36	55.7	55.7	55.7	90.069	0	558940000000	299260000000	259680000000	24	26	26	26	28	25	28	24	28	26	27	27	25	27	P23921	P23921	Ribonucleoside-diphosphate reductase large subunit	RRM1
NaN	1.1569	NaN	0.90324	0.62108	NaN	NaN	NaN	NaN	NaN	NaN	NaN	NaN	NaN				4	3	3	9.3	8.1	8.1	73.475	0	1052900000	678040000	374860000	1	2	1	2	3	1	2	1	0	1	1	1	0	0	P24386	P24386	Rab proteins geranylgeranyltransferase component A 1	CHM
1.033	0.94154	0.95445	0.92028	0.71194	1.3399	0.59312	1.0034	0.68554	0.82073	0.81289	0.84256	0.75584	0.75779				12	9	9	60.9	55.6	55.6	24.763	0	596750000000	320410000000	276340000000	12	12	12	11	11	12	10	9	9	8	9	9	9	9	P24534	P24534	Elongation factor 1-beta	EEF1B2
0.99814	0.78999	0.90243	0.76522	0.70949	1.1252	0.46521	1.0331	0.70112	0.89348	0.84576	0.82612	0.88285	0.75091				11	11	11	42.2	42.2	42.2	28.908	0	288470000000	156050000000	132430000000	9	8	8	6	6	7	8	6	9	8	9	7	8	8	P24539	P24539	ATP synthase subunit b, mitochondrial	ATP5F1
0.97958	0.90136	1.0088	0.99181	0.77571	1.3881	0.59922	1.0967	0.76163	0.82182	0.8682	1.0252	0.76067	0.91091				10	10	4	70.3	70.3	22.8	18.042	0	107120000000	55858000000	51266000000	8	6	6	7	8	7	7	8	8	8	7	7	9	8	P24666;P24666-4;P24666-3	P24666;P24666-4;P24666-3	Low molecular weight phosphotyrosine protein phosphatase	ACP1
NaN	NaN	NaN	NaN	NaN	NaN	NaN	NaN	NaN	NaN	NaN	NaN	NaN	NaN				7	1	1	63.3	15.8	15.8	17.977	0	214070000	66559000	147510000	5	4	5	6	6	5	5	5	6	6	4	5	6	7	P24666-2	P24666-2	Low molecular weight phosphotyrosine protein phosphatase	ACP1
1.0039	0.86861	0.89008	0.85202	0.64961	1.1646	0.49921	1.0111	0.61971	0.79636	0.76922	0.76928	0.71015	0.69213				21	21	21	51.8	51.8	51.8	45.199	0	487640000000	264410000000	223230000000	20	19	20	19	19	18	18	15	15	15	15	14	15	15	P24752;P24752-2	P24752	Acetyl-CoA acetyltransferase, mitochondrial	ACAT1
1.005	0.90665	1.0733	0.80022	0.66312	1.3158	0.65894	1.0112	1.0314	0.95444	NaN	1.0589	NaN	NaN				18	18	18	14	14	14	217.17	0	6006000000	3240100000	2765900000	5	9	7	10	11	9	9	6	2	5	3	6	2	4	P24928;P24928-2	P24928	DNA-directed RNA polymerase II subunit RPB1	POLR2A
0.9972	0.94376	0.96934	0.89458	0.725	1.3043	0.5553	1.0291	0.7215	0.77993	0.81415	0.79905	0.73867	0.72564				15	13	13	57.4	51	51	33.929	0	105520000000	58493000000	47027000000	11	11	12	11	10	13	11	12	12	12	13	12	12	12	P24941;P24941-2	P24941;P24941-2	Cyclin-dependent kinase 2	CDK2
NaN	NaN	NaN	NaN	NaN	NaN	NaN	NaN	NaN	NaN	NaN	NaN	0.98893	NaN				5	5	5	2.6	2.6	2.6	311.64	0	16224000000	8217200000	8007300000	0	0	0	1	2	0	4	1	0	0	0	0	2	1	P25054;P25054-2	P25054;P25054-2	Adenomatous polyposis coli protein	APC
1.007	0.92522	0.97369	0.97618	0.67971	1.2506	0.63877	0.99242	0.75598	0.91407	0.85712	0.96859	0.77898	0.85425				48	48	48	60.5	60.5	60.5	90.98	0	422600000000	221300000000	201290000000	41	39	41	41	39	40	35	34	33	34	33	32	33	35	P25205;P25205-2	P25205;P25205-2	DNA replication licensing factor MCM3	MCM3
1.5494	NaN	NaN	NaN	NaN	NaN	NaN	NaN	NaN	NaN	NaN	NaN	NaN	1.1197				1	1	1	8.2	8.2	8.2	22.831	0.00040494	3379900000	1888200000	1491700000	1	1	1	1	1	1	1	1	1	1	1	1	1	1	P25208	P25208	Nuclear transcription factor Y subunit beta	NFYB
1.0748	0.96916	0.97607	0.91135	0.74845	1.2597	0.57725	NaN	0.96411	NaN	0.93319	NaN	0.97371	0.85774				8	8	8	29.3	29.3	29.3	33.178	0	13669000000	7135800000	6533000000	6	6	6	7	4	3	6	4	3	3	4	3	5	4	P25325;P25325-2	P25325;P25325-2	3-mercaptopyruvate sulfurtransferase	MPST
NaN	NaN	NaN	NaN	NaN	NaN	NaN	NaN	NaN	NaN	NaN	NaN	NaN	NaN				3	3	3	1	1	1	337.08	0.0013553	366360000	194080000	172270000	0	2	1	0	1	0	1	1	0	1	0	0	1	0	P25391	P25391	Laminin subunit alpha-1	LAMA1
0.97453	0.88888	0.9537	1.0273	0.74574	1.2688	0.6979	0.997	0.72111	0.9689	0.82626	1.0053	0.86076	0.82413				10	10	10	76.5	76.5	76.5	14.515	0	1443300000000	734500000000	708790000000	9	8	8	8	8	8	8	8	9	8	8	9	8	8	P25398	P25398	40S ribosomal protein S12	RPS12
0.91585	0.92075	1.1197	0.90616	0.71505	1.3768	0.60481	1.0579	0.8032	0.9741	0.95206	0.88154	0.77295	0.77064				14	11	10	21.1	17.7	16.6	88.06	0	13294000000	6901100000	6392600000	7	10	10	10	8	8	9	8	7	9	8	8	9	9	P25440;P25440-2;P25440-4;P25440-3	P25440;P25440-2;P25440-4;P25440-3	Bromodomain-containing protein 2	BRD2
NaN	NaN	NaN	NaN	NaN	NaN	NaN	NaN	NaN	NaN	NaN	NaN	NaN	NaN				2	2	2	10.4	10.4	10.4	37.732	0.00020517	1529000000	667560000	861400000	0	0	0	1	1	0	1	0	1	0	1	0	0	1	P25445;P25445-6	P25445;P25445-6	Tumor necrosis factor receptor superfamily member 6	FAS
0.80799	0.77805	1.0487	0.67689	0.74869	1.0943	0.75986	1.1476	0.69482	1.021	0.90935	0.85491	0.80657	0.7897				3	3	3	10.9	10.9	10.9	44.712	0	11907000000	6505000000	5401600000	3	2	3	3	3	2	3	2	2	2	2	2	2	2	P25490;O15391	P25490	Transcriptional repressor protein YY1	YY1
0.99302	0.86229	0.93465	0.91472	0.65134	1.3201	0.61136	1.0274	0.66042	0.79708	0.79063	0.7708	0.74532	0.71989				19	19	18	47.6	47.6	44.1	38.044	0	177790000000	94019000000	83775000000	15	15	16	12	14	15	13	11	12	11	9	10	13	11	P25685;P25685-2	P25685;P25685-2	DnaJ homolog subfamily B member 1	DNAJB1
0.98791	0.91072	0.93482	0.88501	0.67901	1.1718	0.58608	1.0073	0.70323	0.8501	0.82182	0.86466	0.83765	0.78096				34	34	34	52.8	52.8	52.8	59.75	0	3007400000000	1622400000000	1385000000000	30	28	28	29	29	28	29	25	25	25	25	26	25	25	P25705;P25705-2;P25705-3	P25705;P25705-2;P25705-3	ATP synthase subunit alpha, mitochondrial	ATP5A1
0.99949	0.96337	0.93116	0.94619	0.75444	1.4454	0.62953	1.0548	0.69431	0.78018	0.82858	0.80231	0.72447	0.76024				18	18	18	67.7	67.7	67.7	29.555	0	783880000000	416150000000	367730000000	16	17	16	16	16	16	16	15	16	16	16	16	15	15	P25786;P25786-2	P25786;P25786-2	Proteasome subunit alpha type-1	PSMA1
1.1317	1.2562	1.2083	1.1104	0.90755	1.5127	0.63192	1.048	0.72428	0.81917	0.76013	0.8528	0.79556	0.76303				11	11	11	47.9	47.9	47.9	25.898	0	196180000000	100910000000	95266000000	7	8	7	7	9	7	9	6	7	7	8	7	7	7	P25787	P25787	Proteasome subunit alpha type-2	PSMA2
0.98003	0.94245	0.97053	0.93521	0.74768	1.3767	0.66932	1.0015	0.78865	0.89133	0.84689	0.79472	0.84435	0.77472				14	14	14	49.8	49.8	49.8	28.433	0	376270000000	192320000000	183950000000	13	12	13	13	11	10	12	10	9	9	8	9	9	9	P25788;P25788-2	P25788;P25788-2	Proteasome subunit alpha type-3	PSMA3
0.97844	0.90412	0.8968	0.92259	0.70162	1.2937	0.5211	0.97739	0.74288	0.78212	0.79335	0.78421	0.72427	0.66417				11	11	11	50.2	50.2	50.2	29.483	0	352380000000	189870000000	162510000000	10	11	10	10	8	11	9	10	10	10	10	10	10	10	P25789;P25789-2	P25789;P25789-2	Proteasome subunit alpha type-4	PSMA4
0.98742	0.94254	0.95455	0.87525	0.86885	1.274	0.50326	1.028	0.67983	0.78391	0.74663	0.76934	0.72498	0.76213				4	4	4	42.1	42.1	42.1	10.4	0	227160000000	124090000000	103080000000	2	2	2	2	2	3	2	2	3	2	2	2	2	2	P25815	P25815	Protein S100-P	S100P
NaN	NaN	NaN	NaN	NaN	NaN	NaN	NaN	NaN	NaN	NaN	NaN	NaN	NaN				6	6	6	7.7	7.7	7.7	116.61	0	979940000	398630000	581300000	2	0	2	1	1	1	1	1	1	2	1	1	0	2	P26006;P26006-1	P26006;P26006-1	Integrin alpha-3;Integrin alpha-3 heavy chain;Integrin alpha-3 light chain	ITGA3
1.0095	0.91189	0.94584	0.92312	0.77896	1.3123	0.587	0.99332	0.73958	0.84399	0.80627	0.85153	0.79816	0.79071				48	35	31	67.6	52.5	46.6	67.819	0	847150000000	455270000000	391880000000	40	40	38	38	39	39	37	35	34	33	32	29	32	32	P26038	P26038	Moesin	MSN
0.99566	0.86892	0.94488	0.94052	0.70683	1.1466	0.57589	0.99689	0.73045	0.84155	0.9163	1.0002	0.7117	0.81118				25	25	25	61.5	61.5	61.5	54.416	0	138220000000	77137000000	61083000000	17	17	18	16	15	15	18	16	15	17	15	15	17	17	P26196	P26196	Probable ATP-dependent RNA helicase DDX6	DDX6
0.9867	0.88286	1.0692	0.77573	0.81111	1.2603	0.59455	1.0457	0.65678	0.87645	0.87816	0.90172	0.72352	0.74028				48	48	48	34.2	34.2	34.2	183.16	0	64385000000	34835000000	29549000000	22	27	26	24	29	24	25	22	23	24	24	19	20	22	P26358;P26358-2;P26358-3	P26358;P26358-2;P26358-3	DNA (cytosine-5)-methyltransferase 1	DNMT1
0.98239	0.88988	0.89544	0.86155	0.62043	1.2271	0.58798	1.0078	0.72178	0.82118	0.80108	0.85128	0.77308	0.71716				16	16	16	44.6	44.6	44.6	53.5	0	305450000000	168160000000	137290000000	13	12	12	13	10	11	12	11	11	10	11	11	12	10	P26368;P26368-2	P26368;P26368-2	Splicing factor U2AF 65 kDa subunit	U2AF2
1.0159	0.93898	0.92855	0.87846	0.72389	1.26	0.57117	1.0272	0.68371	0.81004	0.77643	0.77424	0.74181	0.72389				16	16	16	54	54	54	24.261	0	1433500000000	792610000000	640900000000	11	12	12	14	14	12	12	7	9	7	8	9	8	8	P26373;P26373-2	P26373;P26373-2	60S ribosomal protein L13	RPL13
1.0063	1.2912	0.9539	0.94255	0.69925	1.3006	0.50201	1.0542	0.61604	0.7943	NaN	NaN	NaN	NaN				7	7	6	12.7	12.7	11.4	74.071	0	4064000000	2313800000	1750100000	3	5	2	3	5	4	4	2	2	2	1	1	1	1	P26374	P26374	Rab proteins geranylgeranyltransferase component A 2	CHML
1.0194	0.88477	0.88312	0.89416	0.66096	1.2347	0.49491	1.0076	0.74868	0.7714	0.7878	0.80769	0.72055	0.71173				16	16	16	37.6	37.6	37.6	46.319	0	112600000000	61216000000	51381000000	13	14	13	12	12	12	12	11	11	12	10	11	12	10	P26440;P26440-2	P26440;P26440-2	Isovaleryl-CoA dehydrogenase, mitochondrial	IVD
1.0161	0.88209	0.87349	0.89078	0.69595	1.2354	0.53427	1.034	0.7257	0.80682	0.83271	0.90765	0.76535	0.77443				6	6	6	41.6	41.6	41.6	11.728	0	1788500000000	964230000000	824310000000	5	5	5	5	5	5	5	4	4	4	4	5	4	4	P26447	P26447	Protein S100-A4	S100A4
0.96484	0.77734	0.81365	0.83256	0.70945	1.0942	0.49504	1.0398	0.72812	1.0823	0.89142	1.1254	0.98136	0.8543				9	6	6	34	22.5	22.5	24.033	0	101210000000	56497000000	44712000000	8	7	8	7	7	7	8	7	7	7	5	7	7	6	P26583	P26583	High mobility group protein B2	HMGB2
1.0306	0.87484	0.88399	0.86722	0.69787	1.2255	0.58701	1.0454	0.69236	0.82997	0.78753	0.80728	0.76689	0.73233				15	15	12	35.8	35.8	33	57.221	0	734220000000	401050000000	333170000000	14	12	11	12	12	13	12	13	12	10	11	10	11	11	P26599;P26599-2;P26599-3	P26599;P26599-2;P26599-3	Polypyrimidine tract-binding protein 1	PTBP1
1.0197	0.94748	0.97074	0.9506	0.73267	1.3547	0.58458	1.0002	0.71498	0.79725	0.76101	0.80258	0.7524	0.71382				47	47	43	66.9	66.9	61.4	83.434	0	1988900000000	1040300000000	948590000000	34	36	35	36	36	36	37	36	39	39	39	40	38	36	P26639;P26639-2	P26639;P26639-2	Threonine--tRNA ligase, cytoplasmic	TARS
1.0251	0.93827	1.0336	0.95113	0.80389	1.3887	0.58973	1.0151	0.74488	0.83057	0.85713	0.87792	0.759	0.7675				58	58	58	51.4	51.4	51.4	140.47	0	643330000000	339550000000	303770000000	39	40	40	40	35	39	41	39	38	41	44	38	41	40	P26640;P26640-2	P26640	Valine--tRNA ligase	VARS
1.0276	0.96491	0.95432	0.97268	0.75889	1.3603	0.58063	1.0335	0.71518	0.82461	0.82452	0.82824	0.77245	0.73846				24	24	24	45.1	45.1	45.1	50.118	0	2443600000000	1306700000000	1136900000000	20	20	20	18	21	21	20	20	20	20	20	21	20	20	P26641;P26641-2	P26641;P26641-2	Elongation factor 1-gamma	EEF1G
0.95196	0.65362	0.69213	0.84437	0.64339	1.1408	0.65259	1.1462	0.82147	0.9646	1.0009	0.9133	0.92743	0.82984				5	5	5	35.2	35.2	35.2	15.649	0	88063000000	51231000000	36832000000	4	4	4	4	4	4	4	4	4	4	4	4	3	4	P26885	P26885	Peptidyl-prolyl cis-trans isomerase FKBP2	FKBP2
1.1365	1.0191	1.0418	0.79438	0.78987	1.5164	0.6003	0.93117	0.6244	0.71533	0.77274	0.9007	0.78614	0.86021				10	10	10	40.3	40.3	40.3	31.73	0	25931000000	12143000000	13788000000	7	6	7	8	8	7	6	5	4	6	5	3	6	4	P27105;P27105-2	P27105;P27105-2	Erythrocyte band 7 integral membrane protein	STOM
1.003	0.81535	0.87241	0.84542	0.64246	1.1123	0.47913	0.95987	0.62984	0.75559	0.76172	0.87105	0.72851	0.67073				13	13	13	66.4	66.4	66.4	25.268	0	126520000000	67548000000	58975000000	12	11	12	11	12	11	12	12	10	11	9	9	10	10	P27144	P27144	GTP:AMP phosphotransferase AK4, mitochondrial	AK4
0.96816	0.93185	0.96958	0.98777	0.78815	1.3578	0.52464	1.0181	0.73297	0.82926	0.82795	0.85426	0.81581	0.76031				17	13	13	64.9	57.1	57.1	27.764	0	745690000000	405060000000	340630000000	14	12	14	13	13	13	14	13	14	14	14	14	12	13	P27348	P27348	14-3-3 protein theta	YWHAQ
NaN	NaN	NaN	NaN	NaN	NaN	NaN	NaN	NaN	NaN	NaN	NaN	NaN	NaN				6	2	1	10.9	3.9	2.5	84.488	0.0039333	117460000	17092000	100370000	1	2	1	2	1	2	4	2	1	1	1	3	0	3	P27448;P27448-3;P27448-4;P27448-6;P27448-2;P27448-8;P27448-7	P27448;P27448-3;P27448-4;P27448-6;P27448-2;P27448-8;P27448-7	MAP/microtubule affinity-regulating kinase 3	MARK3
NaN	NaN	NaN	NaN	NaN	NaN	NaN	NaN	NaN	NaN	NaN	NaN	NaN	NaN				4	4	4	8.6	8.6	8.6	86.636	0	572270000	164270000	408000000	2	2	1	2	1	0	0	3	1	1	1	1	1	2	P27540;P27540-2;P27540-3;P27540-4	P27540;P27540-2;P27540-3;P27540-4	Aryl hydrocarbon receptor nuclear translocator	ARNT
1.0211	0.9697	0.94751	0.85665	0.75155	1.2698	0.52022	1.0526	0.66004	0.83138	0.77486	0.89344	0.85035	0.72422				18	18	18	66.4	66.4	66.4	24.604	0	1450200000000	767240000000	682940000000	15	14	14	15	13	16	14	12	12	12	13	12	12	12	P27635;Q96L21	P27635;Q96L21	60S ribosomal protein L10;60S ribosomal protein L10-like	RPL10;RPL10L
0.95852	0.96637	1.0437	0.95264	0.72931	1.2904	0.58121	1.005	0.64412	0.82473	0.80317	0.78607	0.77319	0.69417				25	25	25	49.8	49.8	49.8	68.137	0	228100000000	125580000000	102520000000	18	19	18	19	18	19	17	20	17	15	20	19	17	17	P27694	P27694	Replication protein A 70 kDa DNA-binding subunit;Replication protein A 70 kDa DNA-binding subunit, N-terminally processed	RPA1
1.0151	0.93605	0.9593	0.9341	0.77413	1.3595	0.57589	1.0025	0.69566	0.8057	0.78425	0.81513	0.74699	0.72521				16	16	16	56	56	56	35.554	0	426800000000	230610000000	196190000000	11	10	12	10	10	10	13	9	10	10	10	11	10	10	P27695	P27695	DNA-(apurinic or apyrimidinic site) lyase;DNA-(apurinic or apyrimidinic site) lyase, mitochondrial	APEX1
1.1069	1.3198	1.2571	NaN	NaN	1.7302	0.8875	1.1481	0.73546	1.1018	0.90292	1.1851	NaN	0.70138				7	7	7	35.8	35.8	35.8	30.518	0	4663500000	2392900000	2270600000	3	1	3	2	1	2	2	3	4	4	3	4	2	5	P27707	P27707	Deoxycytidine kinase	DCK
0.95972	0.94675	0.93944	0.92163	0.71176	1.3805	0.55512	0.99368	0.70595	0.81841	0.80705	0.79656	0.72311	0.71295				65	61	61	38.3	36.8	36.8	242.98	0	205070000000	108980000000	96089000000	37	38	44	41	42	39	41	42	40	31	41	37	31	34	P27708	P27708	CAD protein;Glutamine-dependent carbamoyl-phosphate synthase;Aspartate carbamoyltransferase;Dihydroorotase	CAD
0.98395	0.84681	0.87106	0.89147	0.68342	1.1669	0.59707	1.0303	0.71576	0.82385	0.82683	0.85919	0.79486	0.75681				26	26	26	66.2	66.2	66.2	48.141	0	3296000000000	1802100000000	1493900000000	23	23	23	22	23	22	22	20	20	20	20	20	21	20	P27797	P27797	Calreticulin	CALR
1.0055	0.88674	0.90681	0.80111	0.7603	1.3407	0.53363	1.0113	0.68778	0.82697	0.86981	0.84049	0.7838	0.77997				42	42	17	41.6	41.6	18.3	121	0	776930000000	410600000000	366330000000	34	35	36	35	37	36	35	30	33	33	34	34	35	31	P27816;P27816-6;P27816-2	P27816;P27816-6;P27816-2	Microtubule-associated protein 4	MAP4
NaN	NaN	0.88759	0.51756	0.51826	NaN	NaN	NaN	NaN	NaN	NaN	NaN	NaN	NaN				23	5	5	29.9	8.1	8.1	91.153	0	1131000000	657540000	473470000	15	16	18	18	18	18	17	16	16	16	16	15	17	15	P27816-4	P27816-4	Microtubule-associated protein 4	MAP4
NaN	NaN	NaN	NaN	NaN	NaN	NaN	NaN	NaN	NaN	NaN	NaN	NaN	NaN				22	1	1	29	1.6	1.6	85.251	0.0035687	513570000	66900000	446670000	17	18	19	18	20	19	19	14	15	17	17	16	17	15	P27816-5;P27816-7	P27816-5	Microtubule-associated protein 4	MAP4
1.019	1.0234	1.0339	0.81029	0.83669	1.3823	0.66074	1.0191	0.69093	0.83611	0.90016	0.79963	0.80636	0.78449				25	25	25	36.3	36.3	36.3	67.567	0	2105600000000	1114900000000	990730000000	21	20	20	20	18	21	20	21	20	21	21	21	19	20	P27824;P27824-2;P27824-3	P27824;P27824-2;P27824-3	Calnexin	CANX
NaN	NaN	NaN	NaN	NaN	NaN	NaN	1.5567	NaN	0.82253	NaN	NaN	NaN	NaN				3	3	3	15.5	15.5	15.5	23.264	0.0013446	2151700000	817440000	1334300000	0	1	0	0	1	0	0	2	1	2	1	0	0	1	P28065;P28065-2	P28065;P28065-2	Proteasome subunit beta type-9	PSMB9
1.0437	0.99495	1.0279	0.99574	0.82253	1.4273	0.66263	1.0388	0.7222	0.84369	0.80223	0.90221	0.83713	0.80757				14	14	14	66.8	66.8	66.8	26.411	0	990550000000	522010000000	468540000000	13	13	13	13	12	11	12	9	11	11	9	11	10	9	P28066;P28066-2	P28066;P28066-2	Proteasome subunit alpha type-5	PSMA5
1.0197	1.084	0.99456	1.022	0.88201	1.3241	0.72835	0.92241	0.67122	0.78732	0.80394	0.77445	0.66532	0.63471				10	10	10	39.4	39.4	39.4	29.204	0	171940000000	92147000000	79797000000	8	7	9	9	10	8	9	7	6	6	7	7	7	5	P28070	P28070	Proteasome subunit beta type-4	PSMB4
1.0212	0.97585	0.99322	0.9788	0.77055	1.4254	0.62408	1.0789	0.65185	0.72276	0.77826	0.71702	0.75923	0.67771				7	7	7	23.4	23.4	23.4	25.357	0	174670000000	91949000000	82726000000	6	7	6	6	6	6	6	5	5	5	5	5	5	5	P28072	P28072	Proteasome subunit beta type-6	PSMB6
1.0516	1.0008	1.0924	1.0566	0.87516	1.353	0.6399	0.99144	0.85489	0.96945	0.90771	1.0932	0.93003	0.91455				18	18	18	63.5	63.5	63.5	28.48	0	362070000000	186600000000	175470000000	14	13	13	13	15	14	16	15	13	15	14	14	13	13	P28074;P28074-3;P28074-2	P28074;P28074-3	Proteasome subunit beta type-5	PSMB5
1.0158	0.92652	1.014	0.85277	0.72481	1.3119	0.51681	1.0018	0.60507	0.8055	0.81409	0.73124	0.71587	0.73592				15	15	15	27.5	27.5	27.5	75.475	0	134950000000	75014000000	59940000000	14	11	11	11	13	12	11	10	11	12	11	11	11	10	P28288;P28288-2;P28288-3	P28288;P28288-2	ATP-binding cassette sub-family D member 3	ABCD3
NaN	NaN	NaN	NaN	NaN	NaN	NaN	NaN	NaN	NaN	NaN	NaN	NaN	NaN				3	3	3	2.6	2.6	2.6	138.38	0.00040008	3887500000	2287300000	1600200000	0	1	1	1	0	1	1	1	0	1	2	0	1	0	P28290;P28290-2;P28290-3	P28290;P28290-2;P28290-3	Sperm-specific antigen 2	SSFA2
NaN	NaN	NaN	NaN	NaN	NaN	NaN	NaN	NaN	NaN	NaN	NaN	NaN	NaN				2	2	2	7.9	7.9	7.9	46.944	0	128070000	94371000	33703000	0	0	0	0	0	0	1	1	1	1	1	1	0	0	P28300	P28300	Protein-lysine 6-oxidase	LOX
1.0233	0.87999	0.89443	0.79664	0.5852	1.1702	0.5095	1.0544	0.63245	0.83427	0.7974	0.7804	0.7243	0.72324				37	37	37	57.2	57.2	57.2	79.467	0	140340000000	77828000000	62508000000	28	27	24	27	24	22	22	22	22	21	18	20	18	19	P28331;P28331-2;P28331-4;P28331-5;P28331-3	P28331;P28331-2;P28331-4;P28331-5;P28331-3	NADH-ubiquinone oxidoreductase 75 kDa subunit, mitochondrial	NDUFS1
0.96948	1.1097	1.0057	0.92884	0.75982	1.3322	0.69272	0.91018	0.67128	0.78116	0.69825	1.11	0.6595	0.67914				29	29	29	35.1	35.1	35.1	123.63	0	45071000000	26195000000	18876000000	16	15	14	16	15	13	19	16	14	15	15	15	13	18	P28340	P28340	DNA polymerase delta catalytic subunit	POLD1
0.88581	0.90818	0.86593	0.94954	0.67825	1.1966	0.56911	NaN	0.51496	0.80009	NaN	0.75478	0.77386	0.74578				6	6	6	17.4	17.4	17.4	47.945	0	8776200000	4989600000	3786600000	5	4	3	3	4	3	4	1	3	2	1	2	2	2	P28347;P28347-2;Q99594;Q15561;Q15562;Q15561-3;Q15562-2;Q15562-4	P28347;P28347-2;Q99594;Q15561;Q15562;Q15561-3;Q15562-2;Q15562-4	Transcriptional enhancer factor TEF-1;Transcriptional enhancer factor TEF-5;Transcriptional enhancer factor TEF-3;Transcriptional enhancer factor TEF-4	TEAD1;TEAD3;TEAD4;TEAD2
0.9835	0.92527	0.93425	0.9725	0.7507	1.3401	0.61838	0.98746	0.71639	0.75198	0.76365	0.80526	0.79921	0.73484				18	18	14	56.1	56.1	46.7	41.389	0	69597000000	36513000000	33084000000	14	15	14	13	13	14	14	13	13	11	11	12	11	12	P28482;P28482-2;Q16659;P31152	P28482;P28482-2	Mitogen-activated protein kinase 1	MAPK1
NaN	NaN	NaN	NaN	NaN	NaN	NaN	NaN	NaN	NaN	NaN	NaN	NaN	NaN				3	3	3	16.1	16.1	16.1	24.01	0.0030177	981370000	410090000	571280000	0	1	1	1	1	0	2	2	2	1	1	2	1	1	P28676	P28676	Grancalcin	GCA
1.0869	0.97462	0.9582	0.83144	0.69998	1.4686	0.53805	1.3482	0.8449	1.0953	1.0266	1.2167	0.8027	0.7703				7	7	4	15	15	9.9	56.921	0	9689900000	5144700000	4545200000	2	5	4	3	3	3	2	2	3	2	2	4	2	5	P28702;P28702-3	P28702;P28702-3	Retinoic acid receptor RXR-beta	RXRB
NaN	0.99867	NaN	NaN	NaN	NaN	NaN	NaN	NaN	NaN	NaN	NaN	NaN	NaN				5	5	5	7	7	7	133.11	0	938470000	280950000	657520000	2	4	3	3	3	2	1	2	1	1	0	0	0	1	P28715;P28715-2	P28715	DNA repair protein complementing XP-G cells	ERCC5
1.0572	0.86265	0.93944	0.81694	0.79705	1.2347	0.62361	1.0877	0.69392	0.86517	0.81633	0.93271	0.8604	0.78537				12	12	12	29.5	29.5	29.5	63.544	0	43541000000	23981000000	19560000000	7	9	9	7	8	8	8	8	8	6	10	8	8	8	P28799;P28799-3;P28799-2	P28799;P28799-3;P28799-2	Granulins;Acrogranin;Paragranulin;Granulin-1;Granulin-2;Granulin-3;Granulin-4;Granulin-5;Granulin-6;Granulin-7	GRN
0.9373	0.88735	0.76825	0.89927	0.59152	1.0433	0.57461	0.92566	0.64747	0.71966	0.74123	0.77543	0.67203	0.72575				16	16	16	38.7	38.7	38.7	56.166	0	7367800000	4108100000	3259700000	5	6	7	5	5	5	5	7	7	9	8	6	6	8	P28838;P28838-2	P28838;P28838-2	Cytosol aminopeptidase	LAP3
1.0583	0.93829	0.94368	0.85814	0.65566	1.1944	0.53427	NaN	NaN	NaN	NaN	1.0071	NaN	0.93836				8	8	8	24.8	24.8	24.8	49.452	0	5080400000	2622800000	2457500000	4	4	5	4	4	4	4	4	2	3	3	2	1	2	P29083	P29083	General transcription factor IIE subunit 1	GTF2E1
1.0304	0.81815	0.86545	0.83841	0.79929	1.6154	0.60193	NaN	0.69384	0.79561	0.78148	0.6995	0.71824	0.73316				7	7	7	27.5	27.5	27.5	33.043	0	8657000000	4936600000	3720400000	5	3	4	3	5	4	5	1	3	3	2	2	2	4	P29084	P29084	Transcription initiation factor IIE subunit beta	GTF2E2
0.97327	0.93857	1.058	1.0218	0.71011	1.3923	0.63782	0.97742	0.71973	0.93378	0.86061	0.92951	0.80859	0.75035				38	38	38	39.9	39.9	39.9	138.35	0	85217000000	48311000000	36906000000	28	28	30	29	26	25	29	26	27	21	24	26	25	28	P29144	P29144	Tripeptidyl-peptidase 2	TPP2
1.0359	1.0072	0.948	1.0206	0.7911	1.4074	0.5294	1.0925	0.70226	0.83269	0.8088	0.8288	0.75746	0.7252				11	11	11	34.8	34.8	34.8	36.694	0	65202000000	34401000000	30801000000	8	10	10	9	11	8	9	6	5	6	6	3	6	5	P29218-3;P29218;P29218-2	P29218-3;P29218	Inositol monophosphatase 1	IMPA1
NaN	1.1924	NaN	NaN	NaN	NaN	NaN	NaN	NaN	NaN	NaN	NaN	NaN	NaN				5	4	4	6	4.9	4.9	108.27	0.0030149	961440000	507710000	453730000	2	3	0	3	2	2	2	2	1	1	0	1	0	1	P29317;P29323;P54762;P54764;P29323-2;P29317-2;P54762-5;P54764-2;P29323-3	P29317	Ephrin type-A receptor 2	EPHA2
NaN	NaN	NaN	NaN	NaN	NaN	NaN	NaN	NaN	NaN	NaN	NaN	NaN	NaN				4	4	4	8.6	8.6	8.6	67.56	0.0035701	569760000	303920000	265840000	0	1	1	1	2	1	1	0	2	2	1	1	1	1	P29350;P29350-2;P29350-3;P29350-4	P29350;P29350-2;P29350-3;P29350-4	Tyrosine-protein phosphatase non-receptor type 6	PTPN6
0.86609	1.0218	1.2376	0.98438	0.65535	1.1172	0.5816	0.8926	0.58597	0.69373	0.74436	0.73506	0.83671	0.64393				14	14	13	43.9	43.9	41.4	51.681	0	15754000000	8425700000	7328300000	5	8	6	7	7	6	7	8	7	7	7	6	8	7	P29353-7;P29353-6;P29353;P29353-2;P29353-3;P29353-5;Q6S5L8	P29353-7;P29353-6;P29353;P29353-2;P29353-3;P29353-5	SHC-transforming protein 1	SHC1
NaN	NaN	NaN	NaN	1.1052	NaN	0.96001	0.95707	0.60624	0.74497	0.51303	0.54194	NaN	0.739				9	9	9	41.3	41.3	41.3	32.868	0	8604700000	4161200000	4443500000	3	1	2	4	4	1	2	4	6	4	5	3	3	4	P29372;P29372-5;P29372-4;P29372-2	P29372;P29372-5;P29372-4;P29372-2	DNA-3-methyladenine glycosylase	MPG
1.0449	0.86845	0.81503	0.85167	0.63419	1.2346	0.48941	0.92129	0.66013	0.75774	0.79858	0.7628	0.80726	0.72053				8	8	8	44.9	44.9	44.9	15.693	0	23395000000	13712000000	9682700000	6	7	8	6	4	5	6	6	4	4	3	4	3	3	P29373;P29762	P29373	Cellular retinoic acid-binding protein 2	CRABP2
NaN	NaN	NaN	NaN	NaN	NaN	NaN	NaN	NaN	NaN	NaN	NaN	NaN	NaN				2	2	2	1.6	1.6	1.6	192.09	0.0060919	558670000	193540000	365130000	0	0	0	0	0	0	0	0	1	0	0	0	0	0	P29375;P29375-2	P29375;P29375-2	Lysine-specific demethylase 5A	KDM5A
1.0131	0.93843	0.96062	0.95684	0.75216	1.355	0.56712	1.014	0.71053	0.80875	0.8064	0.81281	0.73971	0.71788				40	40	40	72.6	72.6	72.6	67.877	0	6881600000000	3813000000000	3068700000000	30	27	31	29	28	29	28	27	29	27	27	27	27	26	P29401;P29401-2	P29401;P29401-2	Transketolase	TKT
1.1673	0.63141	0.68058	0.65104	NaN	NaN	NaN	0.95191	0.80647	NaN	NaN	NaN	NaN	NaN				5	5	3	14.8	14.8	10.6	44.505	0	5988400000	3757300000	2231100000	2	4	3	4	2	3	3	4	2	2	3	2	1	1	P29558;P29558-2;Q6XE24;Q6XE24-3;Q6XE24-4;Q6XE24-5;Q6XE24-2	P29558;P29558-2	RNA-binding motif, single-stranded-interacting protein 1	RBMS1
NaN	NaN	0.89174	0.94506	0.68145	NaN	0.75255	NaN	NaN	NaN	NaN	NaN	NaN	0.74144				7	7	7	8.7	8.7	8.7	97.55	0	2182400000	1144300000	1038100000	2	3	2	2	5	2	4	2	2	1	2	1	1	2	P29590;P29590-4;P29590-2;P29590-3;P29590-14;P29590-11;P29590-10;P29590-12;P29590-5;P29590-9;P29590-13;P29590-8	P29590;P29590-4;P29590-2;P29590-3;P29590-14;P29590-11;P29590-10;P29590-12;P29590-5;P29590-9;P29590-13;P29590-8	Protein PML	PML
0.97842	0.98788	1.0463	0.99338	0.7927	1.3906	0.682	0.98629	0.73098	0.84342	0.83162	0.94598	0.91425	0.84721				23	23	0	83.6	83.6	0	31.121	0	1363400000000	717290000000	646090000000	19	18	19	19	21	21	21	16	15	16	17	16	16	17	P29692	P29692	Elongation factor 1-delta	EEF1D
NaN	NaN	NaN	NaN	NaN	NaN	NaN	NaN	NaN	NaN	NaN	NaN	NaN	NaN	+			23	1	1	37.1	2.2	2.2	71.407	1	309190000	157470000	151710000	19	17	18	19	20	20	20	16	16	16	17	17	16	17	P29692-2	P29692-2	Elongation factor 1-delta	EEF1D
1.111	1.0085	1.3631	NaN	0.8644	NaN	0.80381	NaN	0.50586	NaN	NaN	NaN	NaN	NaN				22	1	1	86.4	8.2	8.2	28.558	0	4783400000	2518600000	2264800000	18	17	18	18	20	20	20	15	15	16	16	15	16	16	P29692-3	P29692-3	Elongation factor 1-delta	EEF1D
NaN	NaN	NaN	NaN	NaN	NaN	NaN	NaN	NaN	NaN	NaN	NaN	NaN	NaN				21	1	1	82.4	11.1	11.1	29.07	0	1639200000	917710000	721510000	17	16	16	17	19	19	19	13	12	13	14	13	13	15	P29692-4	P29692-4	Elongation factor 1-delta	EEF1D
NaN	0.87766	NaN	NaN	NaN	NaN	NaN	NaN	NaN	NaN	NaN	NaN	NaN	NaN	+			5	2	2	12.6	3.9	3.9	42.933	1	4233400000	2324000000	1909400000	4	5	4	3	3	4	4	3	4	4	4	3	4	3	P29803	P29803	Pyruvate dehydrogenase E1 component subunit alpha, testis-specific form, mitochondrial	PDHA2
0.94032	0.98655	0.93762	1.1142	1.1162	1.9049	0.87206	1.0078	0.73222	0.83061	0.83057	0.79011	1.0701	1.0607				13	13	13	63.9	63.9	63.9	31.554	0	219710000000	101710000000	118010000000	7	9	9	9	10	9	10	9	9	10	9	11	10	10	P29966	P29966	Myristoylated alanine-rich C-kinase substrate	MARCKS
1.1768	1.302	1.1106	1.2811	NaN	1.3731	0.48115	0.94794	0.74416	0.98887	0.81641	0.93068	0.77159	0.85415				9	9	5	32	32	18.9	42.123	0	14263000000	7900500000	6362500000	5	5	4	5	3	5	6	5	5	5	5	5	5	5	P29992;O95837	P29992	Guanine nucleotide-binding protein subunit alpha-11	GNA11
0.97931	0.68029	NaN	0.73063	NaN	NaN	NaN	0.82272	0.59691	0.86909	NaN	0.84048	0.71307	0.59022				9	9	9	20.8	20.8	20.8	61.719	0	4877200000	2876900000	2000200000	3	3	2	2	2	2	1	5	2	3	1	4	3	4	P30038;P30038-3;P30038-2	P30038;P30038-3;P30038-2	Delta-1-pyrroline-5-carboxylate dehydrogenase, mitochondrial	ALDH4A1
1.0361	0.92616	0.92221	0.93387	0.71668	1.3482	0.50542	1.0208	0.67284	0.80864	0.75155	0.74193	0.73004	0.66676				13	13	13	50.6	50.6	50.6	28.993	0	454190000000	247870000000	206320000000	10	10	10	10	10	9	10	10	9	10	9	9	10	9	P30040;P30040-2	P30040	Endoplasmic reticulum resident protein 29	ERP29
0.99606	0.95288	1.0078	0.97584	0.74317	1.3587	0.5928	1.0095	0.70547	0.79926	0.80596	0.82121	0.76575	0.70561				21	21	21	86.2	86.2	86.2	25.035	0	1891600000000	1015000000000	876610000000	17	18	18	18	17	18	18	17	18	17	16	16	17	16	P30041	P30041	Peroxiredoxin-6	PRDX6
0.891	0.95467	0.87642	0.88365	0.6173	1.1835	0.74509	0.86945	0.73749	0.88878	1.0071	0.84753	0.90508	0.7652				11	11	11	51.5	51.5	51.5	28.17	0	92974000000	49086000000	43887000000	7	7	8	7	7	7	6	6	8	7	6	5	7	7	P30042;P30042-2	P30042;P30042-2	ES1 protein homolog, mitochondrial	C21orf33
0.97904	0.92748	1.0017	1.0929	0.80966	1.6039	0.71706	0.97987	0.87724	0.92961	0.88699	1.0864	1.0152	0.80641				14	14	14	74.8	74.8	74.8	22.119	0	133020000000	68155000000	64864000000	9	11	10	11	8	12	10	11	8	9	10	11	10	9	P30043	P30043	Flavin reductase (NADPH)	BLVRB
0.97399	0.85007	0.86421	0.87846	0.63695	1.2775	0.55246	1.0642	0.69076	0.78942	0.77125	0.77743	0.74001	0.69821				8	8	8	37.9	37.9	37.9	22.086	0	780600000000	425410000000	355190000000	8	8	8	8	7	8	8	6	7	6	6	6	6	7	P30044;P30044-2;P30044-3;P30044-4	P30044;P30044-2;P30044-3;P30044-4	Peroxiredoxin-5, mitochondrial	PRDX5
0.89058	0.71678	0.78625	1.0063	0.63183	1.162	0.6867	1.0285	0.70167	0.81201	0.81091	0.87073	0.71959	0.80571				10	10	10	64.4	64.4	64.4	12.712	0	239880000000	128110000000	111770000000	8	7	6	7	4	7	6	6	5	7	6	7	6	8	P30046;A6NHG4;P30046-2	P30046;A6NHG4;P30046-2	D-dopachrome decarboxylase;D-dopachrome decarboxylase-like protein	DDT;DDTL
NaN	1.198	1.0938	1.1595	0.79996	1.5948	0.55335	1.0207	0.73401	0.89425	0.82075	0.92327	0.72164	0.87525				4	4	4	75	75	75	9.6981	0	15526000000	9541400000	5984600000	1	3	2	3	3	1	3	3	2	2	2	2	2	3	P30047;P30047-2	P30047;P30047-2	GTP cyclohydrolase 1 feedback regulatory protein	GCHFR
0.97685	0.88213	0.86921	0.86923	0.62729	1.1448	0.5376	1.0392	0.62611	0.80882	0.77226	0.77919	0.7513	0.69056				11	11	11	45.7	45.7	45.7	27.692	0	959270000000	511860000000	447400000000	11	10	11	11	11	11	11	10	9	9	9	9	9	9	P30048;P30048-2	P30048;P30048-2	Thioredoxin-dependent peroxide reductase, mitochondrial	PRDX3
1.0596	1.0534	0.95968	1.1329	0.79636	1.4757	0.45388	0.96806	0.61758	0.75227	0.73012	0.84889	0.60517	0.72436				3	3	3	17.3	17.3	17.3	17.49	0	111370000000	63802000000	47566000000	2	2	3	3	3	3	3	2	2	3	2	2	3	3	P30049	P30049	ATP synthase subunit delta, mitochondrial	ATP5D
1.0137	0.89762	0.9205	0.99048	0.69262	1.2893	0.60131	1.004	0.7978	0.94316	1.0011	0.84862	0.7322	0.80912				15	15	15	81.2	81.2	81.2	17.818	0	915020000000	528650000000	386360000000	11	12	12	11	11	11	14	7	8	8	8	7	8	8	P30050;P30050-2	P30050;P30050-2	60S ribosomal protein L12	RPL12
1.0098	0.87613	0.86208	0.84644	0.66343	1.1621	0.50611	0.98232	0.63317	0.78117	0.77267	0.76977	0.75467	0.69038				14	14	14	57.6	57.6	57.6	31.387	0	802430000000	446070000000	356350000000	12	12	12	12	12	11	12	11	11	11	12	12	11	11	P30084	P30084	Enoyl-CoA hydratase, mitochondrial	ECHS1
0.94176	0.8824	0.93151	0.98173	0.79112	1.2726	0.58612	1.0093	0.71328	0.84909	0.88695	0.84464	0.79371	0.724				9	9	9	39.3	39.3	39.3	22.222	0	126200000000	70091000000	56113000000	7	7	7	7	6	6	7	6	6	6	7	6	6	6	P30085;P30085-2	P30085;P30085-2	UMP-CMP kinase	CMPK1
1.0205	0.93719	1.0006	0.9966	0.72454	1.3811	0.66358	1.0109	0.77787	0.86363	0.84522	0.91155	0.83932	0.81643				12	12	12	76.5	76.5	76.5	21.057	0	1087100000000	577290000000	509770000000	10	10	9	10	10	9	10	9	10	10	9	10	10	10	P30086	P30086	Phosphatidylethanolamine-binding protein 1;Hippocampal cholinergic neurostimulating peptide	PEBP1
1.0336	0.93069	0.94866	0.92694	0.7377	1.2821	0.57882	1.0227	0.69843	0.83244	0.81493	0.87247	0.80229	0.76053				41	40	40	68.9	65.9	65.9	56.782	0	3360300000000	1814700000000	1545500000000	37	37	38	36	39	35	39	32	33	32	30	33	33	33	P30101	P30101	Protein disulfide-isomerase A3	PDIA3
1.0323	0.93409	0.93682	0.94679	0.76457	1.3132	0.5285	1.0148	0.71198	0.79747	0.79667	0.84212	0.74409	0.73821				25	25	22	44.3	44.3	38.9	65.308	0	627640000000	344540000000	283100000000	23	21	23	23	23	22	24	21	21	21	21	21	21	21	P30153	P30153	Serine/threonine-protein phosphatase 2A 65 kDa regulatory subunit A alpha isoform	PPP2R1A
1.003	1.0574	0.98165	1.0099	0.74294	1.4405	0.59305	1.0013	0.69615	0.9897	0.81634	0.7267	0.91837	0.68664				20	17	17	39.3	33.9	33.9	66.213	0	24923000000	12716000000	12206000000	10	9	9	10	9	12	10	8	10	11	9	10	7	9	P30154;P30154-2;P30154-4;P30154-3;P30154-5	P30154;P30154-2;P30154-4;P30154-3;P30154-5	Serine/threonine-protein phosphatase 2A 65 kDa regulatory subunit A beta isoform	PPP2R1B
1.0029	0.8319	0.75995	0.86195	0.59288	1.2691	0.47721	0.99656	0.71283	0.83359	0.89439	0.79456	0.75519	0.79935				12	12	12	16.5	16.5	16.5	91.866	0	13941000000	7744000000	6197400000	7	5	5	7	6	7	4	9	7	8	5	5	7	8	P30260;P30260-2	P30260;P30260-2	Cell division cycle protein 27 homolog	CDC27
1.0393	0.81288	0.79498	0.8073	0.60722	1.0952	0.52054	1.0661	0.5812	0.73036	0.74604	0.71319	0.82952	0.74693				12	11	10	68.1	61.8	58.5	22.04	0	138630000000	84697000000	53930000000	10	10	9	12	10	8	8	9	9	8	9	8	8	8	P30405;P30405-2	P30405	Peptidyl-prolyl cis-trans isomerase F, mitochondrial	PPIF
0.99207	0.84934	0.88226	0.86064	0.72799	1.255	0.6043	1.0656	0.77229	0.81008	0.81111	0.89154	0.77355	0.71385				14	14	14	36.9	36.9	36.9	56.806	0	171080000000	91438000000	79644000000	11	11	11	11	11	11	10	10	10	9	9	10	11	9	P30419;P30419-2;O60551	P30419;P30419-2	Glycylpeptide N-tetradecanoyltransferase 1	NMT1
NaN	NaN	NaN	NaN	NaN	NaN	NaN	1.131	NaN	1.2112	NaN	NaN	NaN	1.0562	+			8	2	0	23.2	5	0	40.496	1	1709500000	818910000	890620000	5	5	4	4	5	5	5	6	7	7	5	6	5	6	P30493;Q29940	P30493;Q29940	HLA class I histocompatibility antigen, B-55 alpha chain;HLA class I histocompatibility antigen, B-59 alpha chain	HLA-B
0.98102	1.0671	1.295	0.91208	0.91546	1.496	0.7808	1.0479	0.7144	0.86014	0.94738	0.86969	0.86971	0.80962				14	14	1	44.3	44.3	4.1	40.885	0	73721000000	38944000000	34777000000	8	7	6	9	8	8	9	9	11	9	11	9	9	9	P30508;P30505;Q29960-2;P30510;Q29960;Q9TNN7;Q07000;Q95604	P30508;P30505;Q29960-2;P30510;Q29960;Q9TNN7;Q07000;Q95604	HLA class I histocompatibility antigen, Cw-12 alpha chain;HLA class I histocompatibility antigen, Cw-8 alpha chain;HLA class I histocompatibility antigen, Cw-16 alpha chain;HLA class I histocompatibility antigen, Cw-14 alpha chain;HLA class I histocompatibility antigen, Cw-5 alpha chain;HLA class I histocompatibility antigen, Cw-15 alpha chain;HLA class I histocompatibility antigen, Cw-17 alpha c…	HLA-C
1.037	0.89593	0.98755	0.81659	0.70259	1.3106	0.6332	0.99328	0.63272	0.89656	0.87381	0.83119	0.89	1.0985				11	11	11	43.7	43.7	43.7	36.032	0	18932000000	10603000000	8328800000	7	6	5	6	6	4	5	4	6	7	4	5	5	5	P30519;P30519-2	P30519;P30519-2	Heme oxygenase 2	HMOX2
1.0247	0.96166	1.0224	1.0035	0.72646	1.4403	0.60053	1.1168	0.79551	0.86161	0.86236	0.81841	0.79365	0.78698				21	21	21	55	55	55	50.097	0	115130000000	62462000000	52666000000	12	14	14	13	12	13	13	14	11	12	11	13	13	12	P30520;Q8N142;Q8N142-2	P30520	Adenylosuccinate synthetase isozyme 2	ADSS
0.96594	0.9522	0.88753	0.95831	0.77238	1.1532	0.63506	1.0366	0.68783	0.88783	0.8475	0.85839	0.79613	0.8519				11	11	11	31.7	31.7	31.7	41.465	0	24425000000	13275000000	11151000000	8	8	8	9	7	8	6	4	6	4	5	6	4	5	P30533	P30533	Alpha-2-macroglobulin receptor-associated protein	LRPAP1
NaN	NaN	NaN	NaN	NaN	NaN	NaN	1.2018	NaN	NaN	0.73646	NaN	NaN	1.5779				3	3	3	13.6	13.6	13.6	18.828	0.00059242	35659000000	18804000000	16855000000	2	3	1	2	1	1	1	2	2	2	2	2	2	2	P30536	P30536	Translocator protein	TSPO
1.0799	0.99272	0.96818	0.96198	0.76358	1.4816	0.63694	1.0168	0.67921	0.78211	0.76269	0.79588	0.72025	0.72546				18	18	18	39.3	39.3	39.3	54.889	0	156120000000	86723000000	69400000000	11	13	13	13	13	12	11	13	13	12	11	10	10	10	P30566;P30566-2	P30566;P30566-2	Adenylosuccinate lyase	ADSL
0.97272	0.86624	0.8668	0.93458	0.72376	1.2961	0.54969	0.93677	0.72515	0.80738	0.80686	0.87715	0.76661	0.69434				57	57	55	43.3	43.3	41.5	156.78	0	126950000000	68033000000	58915000000	39	43	43	43	37	39	42	31	27	30	28	35	29	29	P30622-2;P30622;P30622-1	P30622-2;P30622;P30622-1	CAP-Gly domain-containing linker protein 1	CLIP1
1.0167	1.0389	0.96221	0.89515	0.76205	1.5193	0.53337	0.99806	0.63121	0.76871	0.75009	0.7224	0.70026	0.69423				13	13	13	55.1	55.1	55.1	21.676	0	81745000000	40118000000	41627000000	5	7	7	8	6	6	7	9	8	9	9	9	10	7	P30626;P30626-3;P30626-2	P30626;P30626-3;P30626-2	Sorcin	SRI
NaN	NaN	1.0145	1.0389	NaN	NaN	NaN	NaN	NaN	NaN	NaN	NaN	NaN	NaN				5	4	4	27.1	24.2	24.2	27.335	0	2110400000	1004400000	1106100000	1	2	2	2	1	0	1	1	1	1	1	1	1	2	P30711;P30711-2	P30711	Glutathione S-transferase theta-1	GSTT1
0.9921	0.93712	0.93898	0.94134	0.72836	1.4737	0.63594	0.91092	0.75436	0.85822	0.83842	0.86333	0.81876	0.73653				20	20	19	48.5	48.5	45.9	42.741	0	155030000000	82745000000	72285000000	16	14	15	15	15	14	16	14	12	11	14	11	12	11	P30740;P30740-2;O75830	P30740;P30740-2	Leukocyte elastase inhibitor	SERPINB1
1.0088	0.90252	0.96737	NaN	NaN	1.1551	NaN	0.98409	0.67754	0.78186	0.77169	0.73442	0.80126	0.70323				3	3	3	6.8	6.8	6.8	67.638	0	8198300000	4435000000	3763300000	1	1	1	1	1	1	1	2	3	2	1	3	1	2	P30825;P52569;P52569-3	P30825	High affinity cationic amino acid transporter 1	SLC7A1
0.94674	0.85361	0.8723	0.87533	0.67353	1.2484	0.58712	1.0226	0.61574	0.97389	0.77333	0.83355	0.82301	0.79144				11	11	10	29.8	29.8	28	57.206	0	23415000000	13056000000	10359000000	7	6	6	6	6	4	7	7	8	7	6	7	6	8	P30837;P00352;P05091;P05091-2	P30837	Aldehyde dehydrogenase X, mitochondrial	ALDH1B1
NaN	NaN	NaN	NaN	NaN	NaN	NaN	NaN	NaN	NaN	NaN	NaN	NaN	NaN				2	1	1	6.8	4.2	4.2	50.394	0.00059067	97645000	56211000	41434000	1	1	1	1	1	1	1	2	1	2	1	2	2	2	P30838	P30838	Aldehyde dehydrogenase, dimeric NADP-preferring	ALDH3A1
0.97129	0.90467	1.0165	0.89716	0.63521	1.236	0.55163	NaN	NaN	0.72089	NaN	0.67445	NaN	NaN				13	13	13	17.9	17.9	17.9	133.9	0	6294900000	2661600000	3633300000	6	5	4	8	8	6	4	4	4	3	3	5	3	3	P30876	P30876	DNA-directed RNA polymerase II subunit RPB2	POLR2B
0.98016	0.89245	0.93272	0.82852	0.68205	1.1	0.49382	1.0002	0.64863	0.81793	0.79999	0.85519	0.76951	0.75724				29	29	29	56.9	56.9	56.9	72.691	0	538310000000	294250000000	244060000000	22	23	23	22	23	21	24	19	16	18	20	21	19	19	P31040;P31040-2;P31040-3	P31040;P31040-2;P31040-3	Succinate dehydrogenase [ubiquinone] flavoprotein subunit, mitochondrial	SDHA
0.99553	0.93082	0.95034	0.97516	0.6989	1.3975	0.7887	1.0528	0.65279	0.77713	0.76757	0.81684	0.71183	0.71298				22	13	13	57.3	43.6	43.6	50.582	0	51998000000	29427000000	22571000000	19	20	20	20	21	17	19	16	16	17	17	16	16	15	P31150	P31150	Rab GDP dissociation inhibitor alpha	GDI1
0.95925	0.96513	0.95359	0.97689	0.71071	1.3378	0.65155	1.0021	0.75522	0.83338	0.86585	0.9171	0.85246	0.78571				23	23	18	50.4	50.4	37.7	43.66	0	705180000000	376350000000	328830000000	18	20	18	17	19	17	18	16	14	14	15	16	18	16	P31153;P31153-2	P31153;P31153-2	S-adenosylmethionine synthase isoform type-2	MAT2A
NaN	0.90809	1.0137	0.92271	0.66128	1.5935	0.55174	NaN	NaN	NaN	NaN	NaN	NaN	NaN				5	2	2	15.7	8.7	8.7	43.072	0	390370000	190450000	199920000	3	3	3	4	2	2	3	2	2	2	1	2	1	2	P31321	P31321	cAMP-dependent protein kinase type I-beta regulatory subunit	PRKAR1B
1.0031	0.83954	0.85695	0.83799	0.62484	1.1567	0.50162	0.99096	0.64524	0.79319	0.78254	0.78932	0.72851	0.69488				96	96	92	70.5	70.5	68.3	164.94	0	6757100000000	3735100000000	3022000000000	84	80	84	82	82	83	83	77	78	79	76	77	76	75	P31327;P31327-3;P31327-2	P31327;P31327-3;P31327-2	Carbamoyl-phosphate synthase [ammonia], mitochondrial	CPS1
NaN	NaN	NaN	NaN	NaN	NaN	0.37215	NaN	NaN	NaN	NaN	NaN	NaN	NaN				3	3	3	19.2	19.2	19.2	21.641	0	654980000	286800000	368180000	3	2	3	3	3	0	2	0	0	1	0	1	1	0	P31431;P31431-2	P31431;P31431-2	Syndecan-4	SDC4
NaN	0.98759	1.0132	0.86268	0.76861	1.5227	0.85335	1.0058	NaN	1.0006	1.066	NaN	1.1053	0.87201				9	6	2	31.9	23.3	8.8	42.963	0	6291200000	3439200000	2852000000	5	6	5	7	6	6	5	5	4	5	6	5	6	6	P31483;P31483-3	P31483;P31483-3	Nucleolysin TIA-1 isoform p40	TIA1
0.98881	0.89915	1.0134	0.96047	0.77622	1.2798	0.81684	1.0338	0.74751	0.84817	0.85285	0.804	0.87199	0.77192				17	17	17	43.3	43.3	43.3	44.868	0	464480000000	249710000000	214760000000	13	14	15	17	17	15	13	12	12	14	14	13	14	13	P31689;P31689-2	P31689;P31689-2	DnaJ homolog subfamily A member 1	DNAJA1
NaN	NaN	NaN	NaN	NaN	NaN	NaN	NaN	NaN	NaN	NaN	NaN	NaN	NaN				4	2	2	11.5	5	5	55.686	0	459680000	204700000	254980000	2	0	0	0	2	1	0	1	2	2	2	1	1	1	P31749;P31749-2;Q9Y243;Q9Y243-2	P31749;P31749-2;Q9Y243;Q9Y243-2	RAC-alpha serine/threonine-protein kinase;RAC-gamma serine/threonine-protein kinase	AKT1;AKT3
NaN	NaN	NaN	NaN	NaN	NaN	NaN	NaN	NaN	0.79061	NaN	1.0031	NaN	NaN				5	5	3	18.3	18.3	11.9	55.768	0	949420000	638460000	310970000	1	0	0	1	2	1	0	1	1	3	1	4	1	1	P31751;P31751-2	P31751;P31751-2	RAC-beta serine/threonine-protein kinase	AKT2
1.0232	1.0076	1.0404	0.8573	0.7507	1.3127	0.63862	1.0467	0.67198	0.94051	0.8879	0.91711	0.88469	0.87901				21	21	20	57.3	57.3	55.8	52.645	0	480900000000	256480000000	224410000000	18	20	20	20	20	19	18	16	17	16	17	17	17	17	P31930	P31930	Cytochrome b-c1 complex subunit 1, mitochondrial	UQCRC1
1.0075	0.92083	0.86883	0.91087	0.68759	1.2376	0.49284	1.0401	0.67059	0.82612	0.72944	0.78789	0.71293	0.75143				9	9	9	46.1	46.1	46.1	35.329	0	86484000000	49574000000	36910000000	7	9	7	8	6	8	7	8	7	8	6	7	7	6	P31937	P31937	3-hydroxyisobutyrate dehydrogenase, mitochondrial	HIBADH
1.015	0.94465	0.9943	0.96043	0.74132	1.4366	0.72059	1.0268	0.72588	0.81325	0.82118	0.88501	0.82991	0.81078				39	39	39	75.5	75.5	75.5	64.615	0	609060000000	327070000000	281990000000	32	33	32	31	34	30	34	32	32	31	28	32	32	32	P31939;P31939-2	P31939;P31939-2	Bifunctional purine biosynthesis protein PURH;Phosphoribosylaminoimidazolecarboxamide formyltransferase;IMP cyclohydrolase	ATIC
1.0859	1.0304	1.1588	1.0414	0.80494	1.3729	0.75935	1.0167	0.79054	1.0288	0.9605	0.99207	0.84553	0.88443				14	12	12	54.6	51.7	51.7	36.926	0	133330000000	68354000000	64981000000	10	12	11	12	12	11	11	9	11	9	10	12	10	11	P31942;P31942-2;P31942-3;P31942-4;P31942-6;P31942-5	P31942;P31942-2;P31942-3;P31942-4	Heterogeneous nuclear ribonucleoprotein H3	HNRNPH3
0.94717	0.95949	1.0854	1.0409	0.83032	1.3844	1.0324	0.97205	0.88166	1.0915	0.99628	1.2348	1.0897	0.87372				21	21	13	54.8	54.8	34.5	49.229	0	959710000000	476950000000	482760000000	16	15	18	18	17	17	17	18	19	18	18	18	17	18	P31943	P31943	Heterogeneous nuclear ribonucleoprotein H;Heterogeneous nuclear ribonucleoprotein H, N-terminally processed	HNRNPH1
1.0058	0.95128	1.0877	1.0153	0.82756	1.198	0.65511	1.0051	0.83313	0.89413	0.92071	0.97044	0.89143	0.83292				16	9	9	64.2	45.1	45.1	28.082	0	1075700000000	575290000000	500410000000	14	14	13	14	14	15	13	12	14	14	13	15	14	13	P31946;P31946-2	P31946;P31946-2	14-3-3 protein beta/alpha;14-3-3 protein beta/alpha, N-terminally processed	YWHAB
1.0761	1.0325	1.0401	1.035	0.8392	1.4381	0.58502	1.0728	0.72347	0.83445	0.86519	0.87264	0.86295	0.78612				19	16	16	64.9	60.9	60.9	27.774	0	572290000000	299640000000	272660000000	15	15	15	14	15	15	14	12	13	13	13	13	12	12	P31947;P31947-2	P31947;P31947-2	14-3-3 protein sigma	SFN
1.0217	0.9072	0.90876	0.93315	0.72786	1.3447	0.56871	1.0228	0.71698	0.78771	0.79079	0.8647	0.76305	0.76368				43	43	43	69.4	69.4	69.4	62.639	0	1366700000000	727780000000	638900000000	38	37	38	38	40	37	38	31	32	29	29	30	32	32	P31948;P31948-2;P31948-3	P31948;P31948-2;P31948-3	Stress-induced-phosphoprotein 1	STIP1
0.99563	0.90027	0.96446	0.94667	0.81023	1.2333	0.49176	1.0135	0.68237	0.76177	0.7352	0.73908	0.7215	0.70172				8	8	8	82.9	82.9	82.9	11.74	0	574190000000	301650000000	272540000000	5	5	6	4	4	5	4	4	5	4	3	3	4	5	P31949	P31949	Protein S100-A11	S100A11
0.99539	0.98949	1.0661	0.89669	0.77046	1.3531	0.60738	1.0509	0.69822	0.8363	0.84098	0.85678	0.75794	0.7907				38	38	38	33.8	33.8	33.8	139.52	0	390690000000	203900000000	186790000000	28	31	28	28	32	31	30	24	25	20	22	26	26	23	P32004-2;P32004-3;P32004	P32004-2;P32004-3;P32004	Neural cell adhesion molecule L1	L1CAM
NaN	NaN	NaN	NaN	NaN	NaN	NaN	NaN	NaN	NaN	NaN	NaN	NaN	NaN				5	3	3	4.8	3.5	3.5	112.85	0.0004029	1283200000	1175000000	108180000	1	1	1	0	1	0	2	0	0	1	0	1	0	0	P32019;P32019-3;P32019-2;P32019-4	P32019;P32019-3;P32019-2;P32019-4	Type II inositol 1,4,5-trisphosphate 5-phosphatase	INPP5B
0.96634	1.0077	1.0141	1.0442	0.79717	1.4458	0.61695	0.99117	0.78521	0.82304	0.79392	0.81235	0.73374	0.81929				18	17	17	75.3	75.3	75.3	21.892	0	1401000000000	725310000000	675690000000	12	12	12	13	15	13	13	12	13	12	12	12	11	12	P32119;P32119-2	P32119	Peroxiredoxin-2	PRDX2
NaN	NaN	NaN	NaN	NaN	NaN	NaN	1.0993	0.73005	0.62379	0.64855	NaN	0.83469	NaN				5	4	4	14.2	12.5	12.5	46.105	0.0022762	414980000	174860000	240120000	1	1	0	1	2	1	1	1	2	1	1	1	1	0	P32121;P32121-3;P32121-4;P32121-5;P32121-2	P32121;P32121-3;P32121-4;P32121-5;P32121-2	Beta-arrestin-2	ARRB2
NaN	NaN	NaN	NaN	NaN	NaN	NaN	NaN	NaN	0.87201	1.0002	1.0135	0.70534	0.90525				3	3	2	7.7	7.7	5.4	61.244	0	1071100000	546130000	524980000	1	1	1	1	1	0	0	1	2	2	2	3	2	2	P32189;P32189-1;P32189-4;Q14409;P32189-2	P32189;P32189-1;P32189-4;Q14409;P32189-2	Glycerol kinase;Putative glycerol kinase 3	GK;GK3P
1.0837	1.0474	1.0993	1.0239	0.81628	1.4806	0.68137	1.1025	0.77339	1.0173	0.97906	0.94137	0.88906	0.8499				6	6	6	66.4	66.4	66.4	16.185	0	26962000000	14316000000	12646000000	4	3	4	4	5	4	4	3	4	4	4	3	4	4	P32320	P32320	Cytidine deaminase	CDA
NaN	NaN	NaN	NaN	NaN	1.0027	NaN	NaN	NaN	NaN	NaN	NaN	NaN	NaN				2	2	2	16.9	16.9	16.9	20.016	0	4331200000	2574800000	1756400000	1	1	0	0	1	1	1	2	0	1	1	2	1	1	P32321;P32321-2	P32321;P32321-2	Deoxycytidylate deaminase	DCTD
1.004	0.8627	0.84628	0.82441	0.6837	1.0851	0.49026	0.99195	0.65169	0.91128	0.79683	0.92632	0.71846	0.83205				16	16	15	58	58	53.9	33.36	0	356140000000	192440000000	163700000000	14	14	15	15	12	13	14	15	14	15	14	15	14	15	P32322;P32322-3;P32322-2	P32322;P32322-3;P32322-2	Pyrroline-5-carboxylate reductase 1, mitochondrial	PYCR1
0.99909	0.99515	1.0362	1.0344	0.76484	1.4152	0.65138	1.0007	0.7463	0.86274	0.85062	0.83207	0.74785	0.70007				24	24	24	60.8	60.8	60.8	44.934	0	1211600000000	635810000000	575810000000	18	19	18	20	20	19	21	18	19	20	20	18	18	18	P32754;P32754-2	P32754;P32754-2	4-hydroxyphenylpyruvate dioxygenase	HPD
NaN	NaN	NaN	NaN	NaN	NaN	NaN	NaN	NaN	NaN	NaN	NaN	NaN	NaN				3	3	3	5.3	5.3	5.3	62.031	0	568950000	407070000	161870000	1	1	1	1	1	0	0	0	1	2	2	1	1	2	P32780;P32780-2	P32780;P32780-2	General transcription factor IIH subunit 1	GTF2H1
1.0382	0.98766	0.98583	1.011	0.7577	1.3026	0.75327	1.047	0.89112	0.90425	0.75039	0.76759	0.70065	0.73119				13	13	13	46.4	46.4	46.4	44.508	0	73223000000	39118000000	34105000000	7	7	8	8	8	7	10	10	9	8	9	9	7	8	P32929;P32929-2;P32929-3	P32929;P32929-2;P32929-3	Cystathionine gamma-lyase	CTH
0.97588	0.90688	0.90908	0.85152	0.7478	1.2253	0.62072	1.0238	0.70131	0.8148	0.82204	0.848	0.84318	0.76202				11	11	11	69.3	69.3	69.3	21.863	0	1029700000000	563520000000	466210000000	7	7	8	8	8	7	8	9	7	8	7	7	7	7	P32969	P32969	60S ribosomal protein L9	RPL9
0.97389	0.85923	0.94707	0.91933	0.74251	1.2889	0.59466	1.0192	0.70064	0.81241	0.79746	0.81291	0.75243	0.72269				53	53	39	58.6	58.6	42.9	109.68	0	263420000000	142280000000	121140000000	31	35	36	35	37	37	36	32	28	33	34	29	32	32	P33176	P33176	Kinesin-1 heavy chain	KIF5B
1.0463	1.0562	1.0273	0.95674	0.84868	1.4826	0.60054	0.97908	0.67786	0.87142	0.74208	0.74922	0.77	0.69871				19	19	10	47	47	28.9	60.959	0	81821000000	42645000000	39175000000	11	14	15	15	16	13	15	14	15	16	13	14	10	14	P33240;P33240-2	P33240;P33240-2	Cleavage stimulation factor subunit 2	CSTF2
0.99369	0.94238	0.99402	1.0147	0.80962	1.198	0.82021	0.99507	0.74816	0.97285	0.94369	1.0346	0.85668	0.82943				14	14	14	59.9	59.9	59.9	26.563	0	322370000000	177280000000	145080000000	12	11	8	11	10	11	11	12	11	11	11	11	11	12	P33316;P33316-2	P33316;P33316-2	Deoxyuridine 5-triphosphate nucleotidohydrolase, mitochondrial	DUT
NaN	NaN	NaN	1.0426	0.89285	NaN	NaN	NaN	NaN	NaN	NaN	NaN	1.0783	NaN				5	5	5	4.9	4.9	4.9	171.59	0.00040274	15717000000	7866300000	7850700000	2	1	3	2	3	1	1	2	1	1	1	1	1	1	P33527;P33527-5;P33527-2;P33527-3;P33527-9;P33527-8;P33527-6;P33527-7;P33527-4	P33527;P33527-5;P33527-2;P33527-3;P33527-9;P33527-8;P33527-6;P33527-7;P33527-4	Multidrug resistance-associated protein 1	ABCC1
1.0596	0.96764	1.0286	0.93554	0.73799	1.3257	0.65329	NaN	NaN	NaN	0.81433	NaN	0.88428	NaN				3	2	2	32.9	24.1	24.1	9.8602	0.00020412	22296000000	11685000000	10612000000	3	2	2	2	3	2	3	2	1	1	2	1	2	1	P33552	P33552	Cyclin-dependent kinases regulatory subunit 2	CKS2
1.3899	0.89791	1.0495	0.73788	0.76787	1.1044	0.53712	0.94174	0.57155	0.83012	0.93306	0.80714	0.70154	0.76336				10	10	10	19.1	19.1	19.1	82.936	0	7815000000	4474400000	3340600000	4	5	4	5	5	5	5	5	4	4	4	4	3	4	P33897	P33897	ATP-binding cassette sub-family D member 1	ABCD1
NaN	NaN	NaN	1.0521	NaN	NaN	0.90994	1.6588	NaN	NaN	NaN	NaN	NaN	NaN				9	9	9	14	14	14	97.071	0	2730900000	1632700000	1098200000	2	1	2	4	3	1	3	6	1	1	3	3	2	3	P33981;P33981-2	P33981;P33981-2	Dual specificity protein kinase TTK	TTK
0.98311	0.96189	0.94736	0.96994	0.72032	1.3789	0.69884	1.0294	0.71603	0.8157	0.80058	0.80642	0.77559	0.76074				37	37	36	52.3	52.3	51.4	96.557	0	508880000000	269370000000	239510000000	27	31	32	35	30	32	31	27	29	30	29	30	29	31	P33991	P33991	DNA replication licensing factor MCM4	MCM4
1.005	0.99906	1.0414	0.95681	0.75438	1.4092	0.60636	0.99124	0.71472	0.83464	0.81538	0.85111	0.81381	0.72872				43	43	43	62.5	62.5	62.5	82.285	0	471480000000	248950000000	222530000000	31	31	34	32	28	32	31	32	31	33	30	29	30	29	P33992	P33992	DNA replication licensing factor MCM5	MCM5
1.0381	1.07	1.069	0.92188	0.76878	1.3895	0.66054	0.99647	0.70126	0.78353	0.8058	0.8508	0.8096	0.71408				35	35	35	49	49	49	81.307	0	355960000000	186790000000	169180000000	26	24	26	26	27	26	28	26	29	25	25	26	25	23	P33993;P33993-3;P33993-2	P33993;P33993-3	DNA replication licensing factor MCM7	MCM7
0.98028	0.98538	1.2284	0.93602	0.7665	1.2951	0.68093	1.0963	0.66174	0.70128	0.75935	0.6809	0.73711	0.61202				13	12	12	33.5	30.6	30.6	53.082	0	52471000000	29038000000	23434000000	7	7	8	8	7	8	7	9	7	9	7	8	8	8	P34896;P34896-2;P34896-3;P34896-4	P34896;P34896-2;P34896-3;P34896-4	Serine hydroxymethyltransferase, cytosolic	SHMT1
1.0303	0.8806	0.95915	0.90206	0.67129	1.1748	0.592	1.0057	0.72447	0.90708	0.80685	0.85279	0.76592	0.74382				36	36	35	67.5	67.5	67.5	55.992	0	1006800000000	529510000000	477300000000	27	26	26	26	26	27	27	25	24	25	23	24	26	24	P34897;P34897-3;P34897-2	P34897;P34897-3;P34897-2	Serine hydroxymethyltransferase, mitochondrial	SHMT2
NaN	NaN	NaN	NaN	NaN	NaN	NaN	NaN	NaN	NaN	NaN	NaN	NaN	NaN	+			18	1	1	30	1.6	1.6	70.374	1	304860000	304860000	0	15	16	15	14	14	14	16	13	13	12	13	13	11	14	P34931	P34931	Heat shock 70 kDa protein 1-like	HSPA1L
1.0062	0.9683	0.97288	0.99362	0.7634	1.3802	0.61013	1.0343	0.76136	0.86223	0.84238	0.86696	0.83647	0.80573				58	58	55	65.8	65.8	63	94.33	0	1758900000000	932210000000	826730000000	49	48	46	47	47	51	48	41	47	46	44	45	41	42	P34932;P34932-2	P34932	Heat shock 70 kDa protein 4	HSPA4
0.9628	0.91199	0.74215	0.95013	0.60517	0.88843	NaN	0.85011	0.8037	0.91297	0.86532	0.81205	0.94766	0.76318				6	6	6	20.1	20.1	20.1	46.655	0	10657000000	5710000000	4946800000	5	4	3	4	4	3	2	3	4	3	6	3	3	5	P34949;P34949-2	P34949;P34949-2	Mannose-6-phosphate isomerase	MPI
NaN	NaN	NaN	NaN	NaN	NaN	NaN	1.1419	0.66161	0.70013	0.8273	0.69384	0.61397	0.67728				7	7	7	20.6	20.6	20.6	61.68	0	6327700000	2974000000	3353700000	2	2	1	1	0	1	1	4	5	5	2	4	4	3	P35052;P35052-2	P35052;P35052-2	Glypican-1;Secreted glypican-1	GPC1
1.0165	0.84825	0.94476	0.86354	0.6942	1.1835	0.57326	0.98631	0.68534	0.87552	0.8977	0.79536	0.86038	0.74133				36	36	35	50.7	50.7	49.4	100.07	0	94281000000	52407000000	41874000000	20	22	24	22	19	17	21	16	18	15	14	15	17	18	P35221;P35221-2;P35221-3;P26232;P26232-2;P26232-5;P26232-3;P26232-4;P26232-6;REV__Q9P2T0-2;REV__Q9P2T0	P35221;P35221-2	Catenin alpha-1	CTNNA1
1.1542	0.99016	0.79385	0.95337	NaN	1.512	NaN	NaN	NaN	NaN	NaN	NaN	NaN	NaN				9	6	6	19.6	14.7	14.7	85.496	0	772780000	354940000	417840000	4	4	5	5	3	5	2	5	4	3	2	3	2	2	P35222;P35222-2	P35222	Catenin beta-1	CTNNB1
1.0179	0.91706	0.95381	0.92215	0.67399	1.2336	0.47596	1.0451	0.62685	0.82482	0.7562	0.78165	0.67928	0.67347				18	18	18	64.3	64.3	64.3	29.804	0	895330000000	504600000000	390730000000	15	14	14	15	15	14	14	14	14	14	14	14	15	15	P35232;P35232-2	P35232	Prohibitin	PHB
0.98988	0.9206	1.0046	0.98602	0.70015	1.3515	0.73956	1.0053	0.7517	0.81617	0.81298	0.95428	0.8288	0.77439				19	19	18	57.4	57.4	55.3	42.621	0	447320000000	238870000000	208450000000	14	16	15	15	16	15	16	13	13	13	13	14	14	13	P35237	P35237	Serpin B6	SERPINB6
1.0805	1.0295	1.0325	1.0207	0.76472	1.4857	0.62725	0.99151	0.79088	0.97248	0.9542	1.1386	0.85284	0.76558				39	21	21	51.6	29.7	29.7	68.563	0	203960000000	109630000000	94327000000	32	30	29	29	31	30	29	25	24	24	23	24	25	24	P35241;P35241-5;P35241-4;P35241-2;P35241-3	P35241;P35241-5;P35241-4	Radixin	RDX
1.0065	0.76574	0.78723	0.82244	0.68064	1.1858	0.65039	0.92993	0.69767	0.82875	0.92079	0.82442	0.87646	0.87373				7	7	7	62.8	62.8	62.8	13.569	0	36973000000	21173000000	15800000000	6	6	6	5	5	6	5	6	4	4	4	4	5	5	P35244	P35244	Replication protein A 14 kDa subunit	RPA3
0.9643	0.93253	0.92933	0.85751	0.69749	1.1372	0.51536	1.0162	0.62461	0.72766	0.73142	0.70506	0.69607	0.64199				14	14	14	41	41	41	39.681	0	74580000000	41727000000	32853000000	8	10	9	8	7	8	7	11	12	11	10	9	10	11	P35249;P35249-2	P35249;P35249-2	Replication factor C subunit 4	RFC4
1.0307	0.91691	0.87949	0.98714	0.70789	1.2221	0.5057	1.0464	0.66069	0.75407	0.73739	0.78261	0.72526	0.69085				16	16	16	46.9	46.9	46.9	39.157	0	73805000000	40139000000	33666000000	11	12	11	14	13	12	12	10	12	13	11	12	9	13	P35250;P35250-2	P35250;P35250-2	Replication factor C subunit 2	RFC2
0.96688	0.8567	0.86794	0.71515	0.82769	1.3041	0.70601	0.99162	0.80161	0.78585	0.84343	0.87209	0.66719	0.6694				23	23	23	26.9	26.9	26.9	128.25	0	17649000000	9598200000	8050700000	10	13	11	10	11	11	10	12	10	11	15	11	9	11	P35251;P35251-2	P35251;P35251-2	Replication factor C subunit 1	RFC1
1.018	0.95424	0.94561	0.88944	0.73928	1.3706	0.64832	0.98761	0.69796	0.80617	0.82954	0.78383	0.83606	0.74838				7	7	6	47.7	47.7	47.7	14.787	0	655630000000	359430000000	296200000000	5	6	5	5	5	5	5	4	4	4	4	4	4	4	P35268	P35268	60S ribosomal protein L22	RPL22
1.1102	0.96713	1.1393	1.1009	0.87299	1.389	0.70825	1.1643	1.0086	1.0654	0.99952	1.2405	0.89409	1.0463				12	12	12	25.9	25.9	25.9	58.24	0	32368000000	13836000000	18532000000	7	6	9	9	10	7	9	6	6	8	7	8	5	7	P35269	P35269	General transcription factor IIF subunit 1	GTF2F1
1.0797	0.91156	0.94733	0.99573	0.76965	1.602	0.54848	1.064	0.69742	0.84085	0.76198	0.81019	0.71464	0.73121				12	12	12	48.7	48.7	48.7	28.048	0	128750000000	70097000000	58654000000	10	11	11	10	11	10	11	8	11	10	8	7	6	7	P35270;REV__Q16649	P35270	Sepiapterin reductase	SPR
0.98894	0.98765	1.0527	0.98571	0.75833	1.4176	0.6789	1.0101	0.77724	0.85212	0.81386	0.93175	0.77962	0.78668				64	64	64	54.7	54.7	54.7	174.76	0	212470000000	114950000000	97516000000	40	38	39	41	39	37	39	41	43	46	41	44	40	42	P35573;P35573-2;P35573-3	P35573;P35573-2;P35573-3	Glycogen debranching enzyme;4-alpha-glucanotransferase;Amylo-alpha-1,6-glucosidase	AGL
0.99186	0.92343	0.95801	0.95359	0.73736	1.2997	0.61815	1.0028	0.76418	0.84466	0.85586	0.8903	0.81495	0.79463				149	149	39	67	67	18.4	226.53	0	6166100000000	3303800000000	2862300000000	121	119	119	126	124	121	124	113	111	113	115	111	112	111	P35579;REV__Q9UKV3-5	P35579	Myosin-9	MYH9
NaN	NaN	NaN	NaN	NaN	NaN	NaN	NaN	NaN	NaN	NaN	NaN	NaN	NaN	+			106	1	1	67.9	1.2	1.2	159.86	1	227450000	141060000	86389000	83	81	80	87	86	82	85	78	77	78	80	78	78	77	P35579-2	P35579-2	Myosin-9	MYH9
0.98651	0.90687	0.94543	0.98839	0.75114	1.2687	0.58273	0.99638	0.75333	0.85023	0.81959	0.86692	0.77587	0.76895				100	78	73	52	42.6	40	229	0	228680000000	120990000000	107680000000	62	66	67	71	67	65	68	55	56	54	53	56	50	54	P35580;P35580-2;P35580-5;P35580-3;P35580-4	P35580;P35580-2;P35580-5;P35580-3;P35580-4	Myosin-10	MYH10
0.98862	0.93121	0.93237	0.91552	0.7063	1.2896	0.62279	1.0322	0.70149	0.81984	0.82729	0.83588	0.74268	0.67438				43	43	43	58.2	58.2	58.2	102.49	0	350620000000	195370000000	155260000000	30	31	27	30	28	29	29	26	28	27	26	30	25	27	P35606;P35606-2	P35606;P35606-2	Coatomer subunit beta	COPB2
NaN	NaN	NaN	NaN	NaN	NaN	NaN	NaN	NaN	NaN	NaN	NaN	NaN	NaN	+			15	1	1	15	0.8	0.8	103.92	1	898870000	545110000	353760000	12	13	13	14	13	12	12	11	9	12	11	10	11	11	P35609-2;P35609	P35609-2;P35609	Alpha-actinin-2	ACTN2
1.1567	1.1868	1.0505	0.95877	0.89186	1.6186	1.0986	1.0865	0.72796	0.81377	0.86135	0.96914	0.85815	0.88185				7	7	7	16.5	16.5	16.5	64.734	0	36346000000	19154000000	17192000000	3	4	4	3	4	4	2	6	6	5	5	5	4	4	P35610;P35610-3;P35610-2	P35610;P35610-3;P35610-2	Sterol O-acyltransferase 1	SOAT1
NaN	NaN	NaN	NaN	NaN	NaN	NaN	NaN	NaN	NaN	NaN	NaN	NaN	NaN				5	5	4	8.7	8.7	7.6	80.954	0	1329400000	948240000	381120000	1	2	2	1	1	2	2	1	1	2	1	2	2	0	P35611;P35611-2;P35611-6;P35611-3;P35611-4;P35611-5	P35611;P35611-2;P35611-6;P35611-3;P35611-4;P35611-5	Alpha-adducin	ADD1
1.0176	1.0249	1.1461	0.9103	0.80186	1.376	0.74969	0.99646	0.84804	0.93777	0.99977	1.1291	0.92949	0.92149				11	11	4	37.1	37.1	15.3	42.2	0	457400000000	241080000000	216320000000	9	7	7	8	9	9	8	7	8	7	7	9	8	8	P35613;P35613-2;P35613-4	P35613;P35613-2;P35613-4	Basigin	BSG
NaN	NaN	NaN	NaN	NaN	NaN	NaN	NaN	NaN	NaN	NaN	NaN	NaN	NaN	+			8	1	1	54.5	6.8	6.8	19.438	1	675960000	283740000	392220000	7	6	5	7	7	7	6	6	6	6	6	6	6	6	P35613-3	P35613-3	Basigin	BSG
0.98785	0.89022	0.88322	0.89659	0.73739	1.2381	0.60309	1.0094	0.7115	0.79082	0.79418	0.83105	0.7844	0.87868				9	9	7	17.7	17.7	13.3	53.425	0	856790000000	452060000000	404730000000	5	5	5	5	5	6	8	8	8	7	6	8	6	7	P35637;P35637-2	P35637;P35637-2	RNA-binding protein FUS	FUS
0.97372	0.94719	0.97888	0.8872	0.79491	1.4155	0.6757	1.0076	0.83871	0.94025	1.0499	0.85143	0.73576	0.83036				34	34	1	23.6	23.6	1	213.62	0	39069000000	19141000000	19928000000	13	14	16	16	17	18	17	17	14	17	13	14	11	12	P35658;P35658-2;P35658-4;P35658-3	P35658;P35658-2;P35658-4;P35658-3	Nuclear pore complex protein Nup214	NUP214
1.0626	0.95404	0.91808	0.87495	0.72688	1.2623	0.52971	0.99636	0.63097	0.78371	0.77762	0.82157	0.75977	0.72472				18	18	18	40.5	40.5	40.5	42.674	0	334280000000	186620000000	147650000000	11	12	12	11	11	11	13	10	10	10	12	10	8	10	P35659;P35659-2	P35659;P35659-2	Protein DEK	DEK
NaN	NaN	NaN	NaN	NaN	NaN	NaN	NaN	NaN	NaN	NaN	NaN	NaN	NaN	+			24	1	1	11	0.6	0.6	227.34	1	89072000	89072000	0	18	18	20	21	20	19	20	17	18	17	17	16	16	17	P35749;P35749-4;P35749-3;P35749-2	P35749;P35749-4;P35749-3;P35749-2	Myosin-11	MYH11
0.88258	0.85558	0.89203	0.78928	0.6306	1.2582	0.61776	1.0186	0.80549	0.86834	0.85766	0.98126	0.83223	0.75948				6	6	6	52.8	52.8	52.8	11.776	0	45588000000	25088000000	20500000000	4	6	5	4	4	4	4	4	5	4	4	4	5	4	P35754	P35754	Glutaredoxin-1	GLRX
1.0219	0.93903	1.1935	0.89947	0.87058	1.5469	0.90484	0.85505	1.3498	1.0718	NaN	0.9105	1.0629	0.83961				8	8	6	24.1	24.1	20.4	42.447	0	7082600000	3584900000	3497700000	4	3	4	6	6	5	4	5	2	4	1	3	3	4	P35813;P35813-3;P35813-2	P35813;P35813-3;P35813-2	Protein phosphatase 1A	PPM1A
0.94456	0.91175	0.68902	0.76956	0.68454	NaN	0.49414	NaN	NaN	NaN	NaN	NaN	NaN	NaN				5	5	5	19.1	19.1	19.1	34.36	0	10216000000	5086700000	5129500000	2	3	1	4	3	1	3	0	0	0	1	1	1	1	P35914;P35914-3;P35914-2	P35914;P35914-3;P35914-2	Hydroxymethylglutaryl-CoA lyase, mitochondrial	HMGCL
1.0183	0.91022	0.98966	0.87897	0.73412	1.3245	0.55695	1.0246	0.70266	0.81096	0.77498	0.8154	0.72239	0.72892				32	32	32	73	73	73	48.633	0	425490000000	228370000000	197120000000	26	25	26	29	27	26	25	24	23	26	27	24	26	26	P35998;P35998-2	P35998;P35998-2	26S protease regulatory subunit 7	PSMC2
1.1274	0.98169	1.0047	1.025	0.68385	1.3757	0.69278	NaN	NaN	0.76692	0.79642	NaN	NaN	NaN				6	6	6	37.5	37.5	37.5	20.878	0	10261000000	5525100000	4736000000	2	3	3	3	2	3	2	3	3	3	6	2	2	2	P36404;P36404-2	P36404;P36404-2	ADP-ribosylation factor-like protein 2	ARL2
0.99782	0.89354	0.91623	0.955	0.64506	1.2081	0.69029	1.0745	0.62264	0.68864	0.6654	0.694	0.66719	0.65144				9	9	9	72	72	72	20.455	0	55726000000	30268000000	25458000000	7	7	7	6	6	7	7	6	7	6	7	7	7	6	P36405	P36405	ADP-ribosylation factor-like protein 3	ARL3
1.0339	0.82691	0.79994	0.88928	0.58247	1.1772	0.56616	1.032	0.69674	0.83796	0.92133	0.87575	0.68102	0.74253				10	10	8	27.5	27.5	23.5	44.424	0	52749000000	28390000000	24359000000	4	4	6	6	5	5	4	6	7	9	7	7	8	9	P36507	P36507	Dual specificity mitogen-activated protein kinase kinase 2	MAP2K2
0.93712	0.85659	0.95598	0.88689	0.64396	1.1636	0.50574	0.96792	0.65637	0.81326	0.82428	0.84429	0.70936	0.65124				14	14	14	41.3	41.3	41.3	32.996	0	448200000000	245800000000	202410000000	12	11	10	12	10	12	11	9	9	8	8	8	8	8	P36542;P36542-2	P36542;P36542-2	ATP synthase subunit gamma, mitochondrial	ATP5C1
1.0995	1.1694	1.0763	1.0438	0.76871	1.3543	0.51504	0.9899	0.70897	0.8171	0.79992	0.76897	0.82916	0.7085				9	9	8	41.6	41.6	37.6	26.145	0	41745000000	22202000000	19543000000	8	6	6	6	6	6	6	6	7	7	5	7	7	7	P36543;P36543-3;P36543-2;Q96A05	P36543;P36543-3;P36543-2	V-type proton ATPase subunit E 1	ATP6V1E1
0.89931	0.80108	0.86446	0.94124	0.58055	1.1637	0.50828	0.90019	0.74782	0.77943	0.85739	0.73686	0.94471	0.69786				13	13	13	33.7	33.7	33.7	50.151	0	24856000000	14240000000	10616000000	4	4	4	4	3	6	4	5	8	7	6	6	6	8	P36551;P36551-2	P36551	Coproporphyrinogen-III oxidase, mitochondrial	CPOX
1.0022	0.88621	0.94257	0.92981	0.71818	1.255	0.54546	1.0493	0.73714	0.86017	0.84995	0.89298	0.73122	0.81696				26	26	26	51.1	51.1	51.1	47.697	0	2717400000000	1443800000000	1273600000000	25	24	23	24	23	24	23	19	20	21	20	20	21	21	P36578	P36578	60S ribosomal protein L4	RPL4
1.0718	NaN	NaN	NaN	NaN	NaN	NaN	NaN	NaN	NaN	NaN	NaN	3.535	NaN				3	3	3	20.3	20.3	20.3	22.519	0	4129700000	1773400000	2356300000	2	1	1	1	1	1	2	1	1	0	1	0	2	2	P36639;P36639-4;P36639-3;P36639-2	P36639;P36639-4;P36639-3;P36639-2	7,8-dihydro-8-oxoguanine triphosphatase	NUDT1
1.009	0.95691	0.97593	0.83633	0.68755	1.269	0.57121	1.0191	0.63611	0.79347	0.80071	0.7623	0.75894	0.70811				41	41	41	47.1	47.1	47.1	106.49	0	504670000000	275370000000	229300000000	27	27	29	28	26	26	28	25	27	28	28	29	25	30	P36776;P36776-2;P36776-3	P36776;P36776-2;P36776-3	Lon protease homolog, mitochondrial	LONP1
[truncated: 4,215 more rows]

## Sheet: Filtered IDs and replace values
Ratio H/L 1_00	Ratio H/L 1_10	Ratio H/L 1_20	Ratio H/L 1_30	Ratio H/L 1_40	Ratio H/L 1_50	Ratio H/L 1_60	Ratio H/L 2_00	Ratio H/L 2_10	Ratio H/L 2_20	Ratio H/L 2_30	Ratio H/L 2_40	Ratio H/L 2_50	Ratio H/L 2_60	Only identified by site	Reverse	Potential contaminant	Peptides	Razor + unique peptides	Unique peptides	Sequence coverage [%]	Unique + razor sequence coverage [%]	Unique sequence coverage [%]	Mol. weight [kDa]	Q-value	Intensity	Intensity L	Intensity H	Peptides 1_00	Peptides 1_10	Peptides 1_20	Peptides 1_30	Peptides 1_40	Peptides 1_50	Peptides 1_60	Peptides 2_00	Peptides 2_10	Peptides 2_20	Peptides 2_30	Peptides 2_40	Peptides 2_50	Peptides 2_60	Protein IDs	Majority protein IDs	Protein names	Gene names
[truncated: 5,492 more rows]

[truncated: 3 more sheets: Clustering Output, Figure 3 Half Live Data, Figure 3 Venn Diagram]
